# Supplementary material
Source: PubMed Central journal article supplement (PMC4300528)
Supplement: NIHMS631900-supplement-Supp_TableS1.pdf [file NIHMS631900-supplement-Supp_TableS1.pdf]

Supplemental Table 1:  
MG1655 - total lipids detected

| Chemical Formula | No. of Batches detected in (of 6) | measured m/z | Neutral Mass | Ion Detected          | Error (ppm) |
|------------------|-----------------------------------|--------------|--------------|-----------------------|-------------|
| C4H8O4           | 5                                 | 159.00550    | 120.04226    | [M+K] <sup>+</sup>    | 0.566       |
| C8H15OS          | 1                                 | 160.09190    | 159.08440    | [M+H] <sup>+</sup>    | 1.437       |
| C5H8O3S          | 1                                 | 171.00880    | 148.01940    | [M+Na] <sup>+</sup>   | 1.047       |
| C8H6O2           | 3                                 | 173.00000    | 134.03680    | [M+K] <sup>+</sup>    | 0.289       |
| C9H16O           | 1                                 | 179.08320    | 140.12010    | [M+K] <sup>+</sup>    | 0.279       |
| C11H22O2         | 1                                 | 187.16950    | 186.16198    | [M+H] <sup>+</sup>    | 1.336       |
| C12H26           | 1                                 | 193.19210    | 170.20345    | [M+Na] <sup>+</sup>   | 2.956       |
| C12H25NO         | 1                                 | 200.20020    | 199.19360    | [M+H] <sup>+</sup>    | 3.347       |
| C10H18O4         | 1                                 | 201.11280    | 202.12051    | [M-H] <sup>-</sup>    | 2.188       |
| C11H19ClO        | 1                                 | 203.11960    | 202.11244    | [M+H] <sup>+</sup>    | 0.556       |
| C10H18O4         | 1                                 | 203.12830    | 202.12051    | [M+H] <sup>+</sup>    | 2.560       |
| C10H14O2         | 1                                 | 205.06240    | 166.09938    | [M+K] <sup>+</sup>    | 0.634       |
| C12H18O3         | 2                                 | 209.11760    | 210.12560    | [M-H] <sup>-</sup>    | 3.467       |
| C13H22O2         | 1                                 | 209.15480    | 210.16198    | [M-H] <sup>-</sup>    | 0.430       |
| C9H16O4          | 1                                 | 211.09420    | 188.10480    | [M+Na] <sup>+</sup>   | 0.848       |
| C12H20O3         | 2                                 | 211.13330    | 212.14125    | [M-H] <sup>-</sup>    | 3.197       |
| C13H24O2         | 1                                 | 211.17040    | 212.17763    | [M-H] <sup>-</sup>    | 0.189       |
| C14H28O          | 1                                 | 211.20680    | 212.21402    | [M-H] <sup>-</sup>    | 0.260       |
| C12H22O3         | 2                                 | 213.14890    | 214.15690    | [M-H] <sup>-</sup>    | 3.401       |
| C13H26O2         | 2                                 | 213.18530    | 214.19328    | [M-H] <sup>-</sup>    | 3.330       |
| C11H20O4         | 2                                 | 215.12810    | 216.13616    | [M-H] <sup>-</sup>    | 3.672       |
| C14H30O          | 1                                 | 215.23770    | 214.22970    | [M+H] <sup>+</sup>    | 3.392       |
| C13H26O          | 1                                 | 221.18860    | 198.19870    | [M+Na] <sup>+</sup>   | 3.070       |
| C13H20O3         | 1                                 | 223.13410    | 224.14125    | [M-H] <sup>-</sup>    | 0.560       |
| C12H18O4         | 2                                 | 225.11240    | 226.12051    | [M-H] <sup>-</sup>    | 3.731       |
| C14H26O2         | 2                                 | 225.18520    | 226.19328    | [M-H] <sup>-</sup>    | 3.597       |
| C15H30O          | 2                                 | 225.22150    | 226.22967    | [M-H] <sup>-</sup>    | 3.978       |
| C10H21NO2        | 1                                 | 226.11950    | 187.15720    | [M+K] <sup>+</sup>    | 3.759       |
| C7H9BrO2         | 1                                 | 226.96810    | 203.97860    | [M+Na] <sup>+</sup>   | 1.229       |
| C11H16O5         | 1                                 | 227.09260    | 228.09978    | [M-H] <sup>-</sup>    | 0.418       |
| C12H20O4         | 2                                 | 227.12810    | 228.13616    | [M-H] <sup>-</sup>    | 3.478       |
| C13H24O3         | 2                                 | 227.16450    | 228.17255    | [M-H] <sup>-</sup>    | 3.412       |
| C14H28O2         | 2                                 | 227.20080    | 228.20893    | [M-H] <sup>-</sup>    | 3.785       |
| C12H22O4         | 2                                 | 229.14370    | 230.15181    | [M-H] <sup>-</sup>    | 3.666       |
| C13H27NO2        | 1                                 | 230.21170    | 229.20420    | [M+H] <sup>+</sup>    | 0.999       |
| C12H16O3         | 1                                 | 231.09970    | 208.10990    | [M+Na] <sup>+</sup>   | 2.505       |
| C13H26O3         | 1                                 | 231.19460    | 230.18820    | [M+H] <sup>+</sup>    | 3.741       |
| C10H10O4         | 5                                 | 233.02040    | 194.05791    | [M+K] <sup>+</sup>    | 2.832       |
| C14H18O3         | 1                                 | 233.11840    | 234.12560    | [M-H] <sup>-</sup>    | 0.322       |
| C15H22O2         | 1                                 | 233.15480    | 234.16198    | [M-H] <sup>-</sup>    | 0.386       |
| C12H25NO         | 1                                 | 236.14190    | 199.19361    | [M-2H+K] <sup>-</sup> | 1.330       |
| C14H22O3         | 2                                 | 237.14970    | 238.15690    | [M-H] <sup>-</sup>    | 0.316       |
| C15H26O2         | 2                                 | 237.18620    | 238.19328    | [M-H] <sup>-</sup>    | 0.801       |
| C10H17NO4        | 1                                 | 238.10390    | 215.11576    | [M+Na] <sup>+</sup>   | 4.536       |
| C12H25NO2        | 2                                 | 238.17730    | 215.18853    | [M+Na] <sup>+</sup>   | 1.889       |
| C12H16O5         | 1                                 | 239.09270    | 240.09978    | [M-H] <sup>-</sup>    | 0.816       |
| C14H24O3         | 1                                 | 239.16540    | 240.17255    | [M-H] <sup>-</sup>    | 0.523       |
| C15H26O2         | 1                                 | 239.20040    | 238.19328    | [M+H] <sup>+</sup>    | 0.627       |
| C15H28O2         | 2                                 | 239.20080    | 240.20893    | [M-H] <sup>-</sup>    | 3.595       |
| C16H32O          | 1                                 | 239.23800    | 240.24532    | [M-H] <sup>-</sup>    | 0.192       |

|          |   |           |           |            |       |
|----------|---|-----------|-----------|------------|-------|
| C16H18O2 | 2 | 241.12260 | 242.13068 | [M-H]-     | 3.359 |
| C14H26O3 | 2 | 241.18000 | 242.18820 | [M-H]-     | 3.835 |
| C15H30O2 | 2 | 241.21640 | 242.22458 | [M-H]-     | 3.777 |
| C16H32O  | 1 | 241.25180 | 240.24532 | [M+H]+     | 3.258 |
| C16H20O2 | 1 | 243.13920 | 244.14633 | [M-H]-     | 0.576 |
| C13H24O4 | 2 | 243.15930 | 244.16746 | [M-H]-     | 3.660 |
| C15H18O3 | 1 | 245.11830 | 246.12560 | [M-H]-     | 0.102 |
| C16H22O2 | 1 | 245.15480 | 246.16198 | [M-H]-     | 0.367 |
| C13H20O3 | 1 | 247.13030 | 224.14120 | [M+Na]+    | 0.490 |
| C15H20O3 | 1 | 247.13410 | 248.14125 | [M-H]-     | 0.506 |
| C14H24O2 | 2 | 247.16690 | 224.17763 | [M+Na]+    | 0.198 |
| C16H24O2 | 2 | 247.16940 | 248.17763 | [M-H]-     | 3.884 |
| C6H10O8  | 1 | 249.00060 | 210.03760 | [M+K]+     | 0.602 |
| C15H22O3 | 1 | 249.14970 | 250.15690 | [M-H]-     | 0.301 |
| C15H30O  | 1 | 249.21860 | 226.22967 | [M+Na]+    | 1.152 |
| C15H24O3 | 1 | 251.16540 | 252.17255 | [M-H]-     | 0.498 |
| C16H28O2 | 1 | 251.20180 | 252.20893 | [M-H]-     | 0.557 |
| C17H32O  | 1 | 251.23810 | 252.24532 | [M-H]-     | 0.215 |
| C13H18O5 | 2 | 253.10720 | 254.11543 | [M-H]-     | 3.773 |
| C16H30O2 | 2 | 253.21630 | 254.22458 | [M-H]-     | 3.993 |
| C17H34O  | 1 | 253.25380 | 254.26097 | [M-H]-     | 0.411 |
| C14H16O2 | 1 | 255.07800 | 216.11503 | [M+K]+     | 0.706 |
| C15H28O3 | 2 | 255.19560 | 256.20385 | [M-H]-     | 3.825 |
| C16H32O2 | 2 | 255.23200 | 256.24023 | [M-H]-     | 3.765 |
| C17H22O2 | 1 | 257.15490 | 258.16198 | [M-H]-     | 0.739 |
| C14H26O4 | 2 | 257.17490 | 258.18311 | [M-H]-     | 3.655 |
| C15H16O4 | 2 | 259.09670 | 260.10486 | [M-H]-     | 3.435 |
| C17H24O2 | 2 | 259.16950 | 260.17763 | [M-H]-     | 3.318 |
| C18H28O  | 2 | 259.20690 | 260.21402 | [M-H]-     | 0.598 |
| C15H18O4 | 2 | 261.11210 | 262.12051 | [M-H]-     | 4.366 |
| C16H22O3 | 1 | 261.14980 | 262.15690 | [M-H]-     | 0.670 |
| C17H26O2 | 1 | 261.18610 | 262.19328 | [M-H]-     | 0.345 |
| C18H30O  | 2 | 261.22250 | 262.22967 | [M-H]-     | 0.398 |
| C15H20O4 | 2 | 263.12790 | 264.13616 | [M-H]-     | 3.762 |
| C17H28O2 | 1 | 263.20170 | 264.20893 | [M-H]-     | 0.152 |
| C18H18O2 | 1 | 265.12360 | 266.13068 | [M-H]-     | 0.717 |
| C15H20O4 | 1 | 265.14310 | 264.13616 | [M+H]+     | 1.245 |
| C15H22O4 | 1 | 265.14470 | 266.15181 | [M-H]-     | 0.603 |
| C16H26O3 | 2 | 265.18110 | 266.18820 | [M-H]-     | 0.660 |
| C17H30O2 | 1 | 265.21750 | 266.22458 | [M-H]-     | 0.713 |
| C11H16O5 | 2 | 267.06230 | 228.09978 | [M+K]+     | 2.340 |
| C13H26O3 | 1 | 267.13800 | 230.18820 | [M-2H+K]-  | 4.511 |
| C18H20O2 | 4 | 267.13800 | 268.14633 | [M-H]-     | 3.968 |
| C14H30O2 | 1 | 267.17440 | 230.22458 | [M-2H+K]-  | 4.563 |
| C16H28O3 | 2 | 267.19560 | 268.20385 | [M-H]-     | 3.653 |
| C17H32O2 | 1 | 267.23300 | 268.24023 | [M-H]-     | 0.146 |
| C18H34O  | 1 | 267.26760 | 266.26097 | [M+H]+     | 2.380 |
| C15H18O3 | 1 | 269.11600 | 246.12560 | [M+Na]+    | 4.400 |
| C12H22O4 | 1 | 269.11600 | 230.15180 | [M+K]+     | 3.902 |
| C15H20O3 | 1 | 269.11720 | 248.14125 | [M-2H+Na]- | 4.812 |
| C18H20O2 | 1 | 269.15380 | 268.14633 | [M+H]+     | 0.743 |
| C18H22O2 | 1 | 269.15480 | 270.16198 | [M-H]-     | 0.334 |
| C17H28O  | 2 | 269.19000 | 248.21402 | [M-2H+Na]- | 4.922 |

|            |   |           |           |            |       |
|------------|---|-----------|-----------|------------|-------|
| C16H3003   | 2 | 269.21120 | 270.21950 | [M-H]-     | 3.811 |
| C17H3402   | 2 | 269.24870 | 270.25588 | [M-H]-     | 0.331 |
| C18H2402   | 2 | 271.17040 | 272.17763 | [M-H]-     | 0.148 |
| C15H2804   | 1 | 271.19160 | 272.19876 | [M-H]-     | 0.402 |
| C16H3203   | 1 | 271.22800 | 272.23515 | [M-H]-     | 0.457 |
| C10H19BrO2 | 1 | 273.04520 | 250.05680 | [M+Na]+    | 3.007 |
| C17H2203   | 1 | 273.14980 | 274.15690 | [M-H]-     | 0.641 |
| C16H2802   | 1 | 273.18490 | 252.20893 | [M-2H+Na]- | 4.795 |
| C18H2602   | 4 | 273.18490 | 274.19328 | [M-H]-     | 4.063 |
| C17H2403   | 1 | 275.16530 | 276.17255 | [M-H]-     | 0.091 |
| C18H2802   | 2 | 275.20170 | 276.20893 | [M-H]-     | 0.145 |
| C16H2204   | 1 | 277.14470 | 278.15181 | [M-H]-     | 0.577 |
| C17H2603   | 1 | 277.18100 | 278.18820 | [M-H]-     | 0.271 |
| C18H3002   | 2 | 277.21730 | 278.22458 | [M-H]-     | 0.040 |
| C18H1603   | 1 | 279.10290 | 280.10995 | [M-H]-     | 0.806 |
| C15H2005   | 1 | 279.12380 | 280.13108 | [M-H]-     | 0.018 |
| C17H2803   | 1 | 279.19670 | 280.20385 | [M-H]-     | 0.444 |
| C18H3202   | 2 | 279.23320 | 280.24023 | [M-H]-     | 0.856 |
| C18H33NO   | 3 | 280.26400 | 279.25621 | [M+H]+     | 1.841 |
| C18H1603   | 1 | 281.11800 | 280.10990 | [M+H]+     | 2.953 |
| C15H2205   | 1 | 281.13920 | 282.14673 | [M-H]-     | 0.907 |
| C17H3003   | 1 | 281.21230 | 282.21950 | [M-H]-     | 0.263 |
| C18H3402   | 1 | 281.24860 | 282.25588 | [M-H]-     | 0.039 |
| C18H29N    | 1 | 282.21930 | 259.23000 | [M+Na]+    | 0.283 |
| C18H35NO   | 4 | 282.27970 | 281.27186 | [M+H]+     | 2.005 |
| C18H2003   | 1 | 283.13400 | 284.14125 | [M-H]-     | 0.088 |
| C17H3003   | 1 | 283.22620 | 282.21950 | [M+H]+     | 1.998 |
| C17H3203   | 1 | 283.22790 | 284.23515 | [M-H]-     | 0.085 |
| C18H3602   | 1 | 283.26420 | 284.27153 | [M-H]-     | 0.215 |
| C18H37NO   | 1 | 284.29490 | 283.28751 | [M+H]+     | 0.408 |
| C16H1405   | 1 | 285.07680 | 286.08413 | [M-H]-     | 0.193 |
| C18H2203   | 1 | 285.14960 | 286.15690 | [M-H]-     | 0.088 |
| C17H2802   | 1 | 285.18370 | 264.20893 | [M-2H+Na]- | 0.386 |
| C19H2602   | 2 | 285.18600 | 286.19328 | [M-H]-     | 0.035 |
| C16H3004   | 1 | 285.20720 | 286.21441 | [M-H]-     | 0.207 |
| C17H3203   | 1 | 285.24300 | 284.23515 | [M+H]+     | 2.047 |
| C17H3403   | 1 | 285.24340 | 286.25080 | [M-H]-     | 0.442 |
| C18H2403   | 2 | 287.16520 | 288.17255 | [M-H]-     | 0.261 |
| C19H2802   | 1 | 287.20170 | 288.20893 | [M-H]-     | 0.139 |
| C17H2204   | 1 | 289.14450 | 290.15181 | [M-H]-     | 0.138 |
| C18H2603   | 1 | 289.18080 | 290.18820 | [M-H]-     | 0.432 |
| C19H3002   | 2 | 289.21720 | 290.22458 | [M-H]-     | 0.384 |
| C18H2002   | 1 | 291.13610 | 268.14633 | [M+Na]+    | 1.886 |
| C15H2403   | 1 | 291.13610 | 252.17255 | [M+K]+     | 1.391 |
| C18H2803   | 1 | 291.19650 | 292.20385 | [M-H]-     | 0.261 |
| C17H3202   | 1 | 291.23070 | 268.24020 | [M+Na]+    | 4.392 |
| C19H3002   | 1 | 291.23070 | 290.22458 | [M+H]+     | 3.952 |
| C19H3202   | 2 | 291.23290 | 292.24023 | [M-H]-     | 0.209 |
| C13H1805   | 1 | 293.07850 | 254.11543 | [M+K]+     | 0.256 |
| C18H3003   | 1 | 293.21220 | 294.21950 | [M-H]-     | 0.089 |
| C19H3402   | 1 | 293.24860 | 294.25588 | [M-H]-     | 0.038 |
| C19H31N    | 1 | 294.22010 | 273.24565 | [M-2H+Na]- | 0.710 |
| C16H2405   | 1 | 295.15490 | 296.16238 | [M-H]-     | 0.695 |

|            |   |           |           |            |       |
|------------|---|-----------|-----------|------------|-------|
| C20H24O2   | 3 | 295.17030 | 296.17763 | [M-H]-     | 0.203 |
| C17H28O4   | 1 | 295.19140 | 296.19876 | [M-H]-     | 0.308 |
| C18H32O3   | 1 | 295.22770 | 296.23515 | [M-H]-     | 0.596 |
| C17H36O    | 1 | 295.23920 | 256.27662 | [M+K]+     | 1.917 |
| C20H32     | 1 | 295.23920 | 272.25040 | [M+Na]+    | 1.429 |
| C19H36O2   | 1 | 295.26410 | 296.27153 | [M-H]-     | 0.545 |
| C18H29N    | 1 | 296.17780 | 259.23000 | [M-2H+K]-  | 2.698 |
| C15H20O6   | 1 | 297.13340 | 296.12599 | [M+H]+     | 0.471 |
| C16H26O5   | 1 | 297.17050 | 298.17803 | [M-H]-     | 0.858 |
| C20H26O2   | 2 | 297.18590 | 298.19328 | [M-H]-     | 0.370 |
| C17H30O4   | 1 | 297.20700 | 298.21441 | [M-H]-     | 0.474 |
| C18H34O3   | 1 | 297.24340 | 298.25080 | [M-H]-     | 0.424 |
| C19H38O2   | 2 | 297.27990 | 298.28718 | [M-H]-     | 0.037 |
| C18H31NO   | 8 | 298.21450 | 277.24056 | [M-2H+Na]- | 2.428 |
| C19H24O3   | 1 | 299.16520 | 300.17255 | [M-H]-     | 0.251 |
| C16H28O5   | 1 | 299.18640 | 300.19368 | [M-H]-     | 0.020 |
| C20H28O2   | 3 | 299.20160 | 300.20893 | [M-H]-     | 0.201 |
| C17H32O4   | 1 | 299.22250 | 300.23006 | [M-H]-     | 0.973 |
| C18H34O3   | 1 | 299.25790 | 298.25080 | [M+H]+     | 0.568 |
| C18H36O3   | 1 | 299.25890 | 300.26645 | [M-H]-     | 0.922 |
| C18H33NO   | 1 | 300.23060 | 279.25621 | [M-2H+Na]- | 0.913 |
| C18H37NO2  | 1 | 300.29020 | 299.28243 | [M+H]+     | 1.668 |
| C16H22O4   | 1 | 301.14180 | 278.15181 | [M+Na]+    | 2.554 |
| C18H22O4   | 1 | 301.14450 | 302.15181 | [M-H]-     | 0.133 |
| C19H26O3   | 2 | 301.18080 | 302.18820 | [M-H]-     | 0.415 |
| C16H28O5   | 1 | 301.19990 | 300.19370 | [M+H]+     | 3.552 |
| C20H30O2   | 3 | 301.21710 | 302.22458 | [M-H]-     | 0.700 |
| C16H27NO2  | 1 | 302.15210 | 265.20418 | [M-2H+K]-  | 2.247 |
| C19H28O3   | 1 | 303.19650 | 304.20385 | [M-H]-     | 0.251 |
| C20H32O2   | 3 | 303.23270 | 304.24023 | [M-H]-     | 0.861 |
| C18H35NO   | 1 | 304.26120 | 281.27186 | [M+Na]+    | 0.378 |
| C15H22O5   | 3 | 305.13610 | 282.14673 | [M+Na]+    | 0.505 |
| C17H22O5   | 1 | 305.13930 | 306.14673 | [M-H]-     | 0.508 |
| C19H30O3   | 1 | 305.21210 | 306.21950 | [M-H]-     | 0.413 |
| C20H34O2   | 2 | 305.24850 | 306.25588 | [M-H]-     | 0.364 |
| C20H28O    | 1 | 307.20450 | 284.21402 | [M+Na]+    | 4.115 |
| C17H32O2   | 1 | 307.20450 | 268.24023 | [M+K]+     | 3.643 |
| C16H31ClO3 | 1 | 307.20450 | 306.19617 | [M+H]+     | 3.437 |
| C19H32O3   | 1 | 307.22770 | 308.23515 | [M-H]-     | 0.573 |
| C20H36O2   | 2 | 307.26420 | 308.27153 | [M-H]-     | 0.199 |
| C16H31O5   | 1 | 308.15820 | 271.20950 | [M-2H+K]-  | 0.325 |
| C16H33NO2  | 2 | 308.19930 | 271.25113 | [M-2H+K]-  | 1.392 |
| C17H26O5   | 2 | 309.17080 | 310.17803 | [M-H]-     | 0.146 |
| C16H30O3   | 1 | 309.18410 | 270.21950 | [M+K]+     | 4.690 |
| C18H30O4   | 1 | 309.20720 | 310.21441 | [M-H]-     | 0.191 |
| C20H30O    | 2 | 309.21910 | 286.22967 | [M+Na]+    | 0.689 |
| C17H34O2   | 2 | 309.21910 | 270.25588 | [M+K]+     | 0.223 |
| C20H38O2   | 2 | 309.27970 | 310.28718 | [M-H]-     | 0.682 |
| C19H31N    | 1 | 310.19390 | 273.24565 | [M-2H+K]-  | 1.125 |
| C16H35NO2  | 1 | 310.21490 | 273.26678 | [M-2H+K]-  | 1.544 |
| C18H24O3   | 1 | 311.16320 | 288.17255 | [M+Na]+    | 4.609 |
| C15H28O4   | 1 | 311.16320 | 272.19880 | [M+K]+     | 4.017 |
| C21H28O2   | 1 | 311.20150 | 312.20893 | [M-H]-     | 0.514 |

|            |   |           |           |           |       |
|------------|---|-----------|-----------|-----------|-------|
| C18H32O4   | 1 | 311.22260 | 312.23006 | [M-H]-    | 0.614 |
| C19H36O3   | 1 | 311.25900 | 312.26645 | [M-H]-    | 0.565 |
| C20H40O2   | 2 | 311.29550 | 312.30283 | [M-H]-    | 0.196 |
| C19H22O4   | 1 | 313.14440 | 314.15181 | [M-H]-    | 0.447 |
| C16H33ClO  | 1 | 313.17020 | 276.22199 | [M-2H+K]- | 1.258 |
| C20H26O3   | 1 | 313.18070 | 314.18820 | [M-H]-    | 0.718 |
| C19H32O    | 2 | 313.19370 | 276.24532 | [M-2H+K]- | 0.690 |
| C21H30O2   | 2 | 313.21720 | 314.22458 | [M-H]-    | 0.354 |
| C18H34O4   | 1 | 313.23830 | 314.24571 | [M-H]-    | 0.450 |
| C19H38O3   | 1 | 313.27410 | 314.28210 | [M-H]-    | 2.317 |
| C19H36O3   | 6 | 313.27410 | 312.26645 | [M+H]+    | 1.226 |
| C18H31NO   | 1 | 314.18870 | 277.24056 | [M-2H+K]- | 1.477 |
| C12H23BrO2 | 2 | 315.03530 | 278.08814 | [M-2H+K]- | 4.571 |
| C17H24O3   | 1 | 315.13640 | 276.17255 | [M+K]+    | 2.237 |
| C19H24O4   | 2 | 315.16010 | 316.16746 | [M-H]-    | 0.286 |
| C20H28O3   | 3 | 315.19640 | 316.20385 | [M-H]-    | 0.558 |
| C21H32O2   | 2 | 315.23280 | 316.24023 | [M-H]-    | 0.511 |
| C18H36O4   | 1 | 315.25390 | 316.26136 | [M-H]-    | 0.606 |
| C18H33NO   | 1 | 316.20450 | 279.25621 | [M-2H+K]- | 0.993 |
| C18H30O2   | 1 | 317.18770 | 278.22458 | [M+K]+    | 0.098 |
| C20H30O3   | 3 | 317.21220 | 318.21950 | [M-H]-    | 0.082 |
| C19H34O2   | 1 | 317.24510 | 294.25590 | [M+Na]+   | 0.066 |
| C21H32O2   | 2 | 317.24760 | 316.24023 | [M+H]+    | 0.312 |
| C21H34O2   | 1 | 317.24840 | 318.25588 | [M-H]-    | 0.665 |
| C20H38O    | 1 | 317.28050 | 294.29227 | [M+Na]+   | 3.111 |
| C18H33NO2  | 1 | 318.23990 | 295.25113 | [M+Na]+   | 1.414 |
| C21H35NO   | 1 | 318.27910 | 317.27186 | [M+H]+    | 0.107 |
| C22H24O2   | 1 | 319.17010 | 320.17763 | [M-H]-    | 0.815 |
| C17H28O4   | 1 | 319.18680 | 296.19876 | [M+Na]+   | 3.703 |
| C19H28O4   | 1 | 319.19140 | 320.19876 | [M-H]-    | 0.285 |
| C20H32O3   | 2 | 319.22790 | 320.23515 | [M-H]-    | 0.075 |
| C21H36O2   | 2 | 319.26420 | 320.27153 | [M-H]-    | 0.191 |
| C17H33NO2  | 1 | 320.19930 | 283.25113 | [M-2H+K]- | 1.340 |
| C15H22O5   | 1 | 321.10890 | 282.14673 | [M+K]+    | 3.036 |
| C20H34O3   | 2 | 321.24350 | 322.25080 | [M-H]-    | 0.081 |
| C21H38O2   | 1 | 321.27980 | 322.28718 | [M-H]-    | 0.345 |
| C17H35NO2  | 2 | 322.21500 | 285.26678 | [M-2H+K]- | 1.176 |
| C20H37NO2  | 1 | 322.27520 | 323.28243 | [M-H]-    | 0.127 |
| C18H28O5   | 1 | 323.18640 | 324.19368 | [M-H]-    | 0.019 |
| C22H28O2   | 1 | 323.20160 | 324.20893 | [M-H]-    | 0.186 |
| C19H32O4   | 1 | 323.22270 | 324.23006 | [M-H]-    | 0.282 |
| C20H34O3   | 1 | 323.25810 | 322.25080 | [M+H]+    | 0.105 |
| C20H36O3   | 1 | 323.25910 | 324.26645 | [M-H]-    | 0.235 |
| C21H40O2   | 2 | 323.29550 | 324.30283 | [M-H]-    | 0.189 |
| C16H33NO3  | 1 | 324.19420 | 287.24604 | [M-2H+K]- | 1.370 |
| C18H30O5   | 1 | 325.20210 | 326.20933 | [M-H]-    | 0.135 |
| C19H34O4   | 1 | 325.23850 | 326.24571 | [M-H]-    | 0.181 |
| C20H36O3   | 2 | 325.27430 | 324.26645 | [M+H]+    | 1.795 |
| C20H38O3   | 2 | 325.27480 | 326.28210 | [M-H]-    | 0.080 |
| C21H42O2   | 2 | 325.31110 | 326.31848 | [M-H]-    | 0.341 |
| C18H31NO4  | 1 | 326.23120 | 325.22531 | [M+H]+    | 4.227 |
| C18H24O3   | 1 | 327.13660 | 288.17255 | [M+K]+    | 2.766 |
| C20H24O4   | 1 | 327.16030 | 328.16746 | [M-H]-    | 0.336 |

|            |   |           |           |            |       |
|------------|---|-----------|-----------|------------|-------|
| C19H28O2   | 1 | 327.17240 | 288.20893 | [M+K]+     | 0.978 |
| C21H28O3   | 1 | 327.19660 | 328.20385 | [M-H]-     | 0.073 |
| C18H32O5   | 1 | 327.21770 | 328.22498 | [M-H]-     | 0.018 |
| C22H32O2   | 2 | 327.23300 | 328.24023 | [M-H]-     | 0.119 |
| C20H40O3   | 2 | 327.29030 | 328.29775 | [M-H]-     | 0.538 |
| C19H33NO2  | 1 | 328.22540 | 307.25113 | [M-2H+Na]- | 1.185 |
| C19H22O5   | 1 | 329.13950 | 330.14673 | [M-H]-     | 0.137 |
| C18H26O3   | 2 | 329.14990 | 290.18820 | [M+K]+     | 4.390 |
| C16H24O7   | 1 | 329.16020 | 328.15221 | [M+H]+     | 2.203 |
| C16H31ClO2 | 2 | 329.16510 | 290.20126 | [M+K]+     | 2.099 |
| C16H27F3O2 | 2 | 329.16950 | 308.19632 | [M-2H+Na]- | 4.484 |
| C16H30F2O2 | 2 | 329.16950 | 292.22139 | [M-2H+K]-  | 1.483 |
| C21H30O3   | 2 | 329.21230 | 330.21950 | [M-H]-     | 0.225 |
| C20H34O    | 1 | 329.22330 | 290.26097 | [M+K]+     | 2.479 |
| C18H34O5   | 1 | 329.23330 | 330.24063 | [M-H]-     | 0.170 |
| C20H34O2   | 1 | 329.24570 | 306.25588 | [M+Na]+    | 1.816 |
| C22H34O2   | 3 | 329.24870 | 330.25588 | [M-H]-     | 0.270 |
| C18H29NO3  | 1 | 330.20250 | 307.21474 | [M+Na]+    | 4.437 |
| C19H24O5   | 1 | 331.15500 | 332.16238 | [M-H]-     | 0.317 |
| C18H28O3   | 1 | 331.16580 | 292.20385 | [M+K]+     | 3.611 |
| C20H28O4   | 2 | 331.19150 | 332.19876 | [M-H]-     | 0.027 |
| C21H32O3   | 2 | 331.22800 | 332.23515 | [M-H]-     | 0.374 |
| C18H34O5   | 1 | 331.24810 | 330.24063 | [M+H]+     | 0.616 |
| C22H36O2   | 1 | 331.26440 | 332.27153 | [M-H]-     | 0.420 |
| C18H33NO2  | 1 | 332.19930 | 295.25113 | [M-2H+K]-  | 1.291 |
| C20H30O4   | 2 | 333.20710 | 334.21441 | [M-H]-     | 0.123 |
| C21H34O3   | 1 | 333.24350 | 334.25080 | [M-H]-     | 0.078 |
| C22H38O2   | 1 | 333.27990 | 334.28718 | [M-H]-     | 0.033 |
| C16H27NO4  | 1 | 334.14230 | 297.19401 | [M-2H+K]-  | 0.925 |
| C18H35NO2  | 2 | 334.21510 | 297.26678 | [M-2H+K]-  | 0.835 |
| C20H29FO3  | 1 | 335.20160 | 336.21007 | [M-H]-     | 3.592 |
| C20H32O4   | 2 | 335.22270 | 336.23006 | [M-H]-     | 0.271 |
| C20H40O2   | 1 | 335.29070 | 312.30283 | [M+Na]+    | 4.032 |
| C22H40O2   | 1 | 335.29550 | 336.30283 | [M-H]-     | 0.182 |
| C18H37NO2  | 2 | 336.23050 | 299.28243 | [M-2H+K]-  | 1.573 |
| C19H30O5   | 1 | 337.20200 | 338.20933 | [M-H]-     | 0.166 |
| C18H36O2S  | 1 | 337.21730 | 316.24360 | [M-2H+Na]- | 2.856 |
| C20H34O4   | 1 | 337.23840 | 338.24571 | [M-H]-     | 0.122 |
| C19H38O3   | 1 | 337.27070 | 314.28210 | [M+Na]+    | 1.829 |
| C22H42O2   | 1 | 337.31130 | 338.31848 | [M-H]-     | 0.264 |
| C11H26NO6P | 1 | 338.11370 | 299.14978 | [M+K]+     | 2.286 |
| C18H39NO2  | 1 | 338.24640 | 301.29808 | [M-2H+K]-  | 0.825 |
| C21H35NO   | 1 | 338.24640 | 317.27186 | [M-2H+Na]- | 0.367 |
| C19H24O4   | 1 | 339.15720 | 316.16746 | [M+Na]+    | 1.530 |
| C16H28O5   | 1 | 339.15720 | 300.19368 | [M+K]+     | 1.103 |
| C18H28O6   | 1 | 339.18140 | 340.18859 | [M-H]-     | 0.233 |
| C20H28O3   | 1 | 339.19460 | 316.20385 | [M+Na]+    | 4.520 |
| C17H32O4   | 1 | 339.19460 | 300.23006 | [M+K]+     | 4.095 |
| C20H36O4   | 1 | 339.25400 | 340.26136 | [M-H]-     | 0.268 |
| C21H40O3   | 1 | 339.29040 | 340.29775 | [M-H]-     | 0.224 |
| C22H44O2   | 1 | 339.32680 | 340.33413 | [M-H]-     | 0.180 |
| C20H33NO   | 1 | 340.20430 | 303.25621 | [M-2H+K]-  | 1.511 |
| C19H26O3   | 1 | 341.14970 | 302.18820 | [M+K]+     | 4.822 |

|            |   |           |           |           |       |
|------------|---|-----------|-----------|-----------|-------|
| C18H3006   | 1 | 341.19700 | 342.20424 | [M-H]-    | 0.085 |
| C22H3003   | 2 | 341.21220 | 342.21950 | [M-H]-    | 0.076 |
| C19H3405   | 1 | 341.23330 | 342.24063 | [M-H]-    | 0.164 |
| C21H3402   | 1 | 341.24550 | 318.25588 | [M+Na]+   | 1.166 |
| C23H3402   | 1 | 341.24850 | 342.25588 | [M-H]-    | 0.325 |
| C20H3604   | 1 | 341.26810 | 340.26136 | [M+H]+    | 1.556 |
| C20H3804   | 1 | 341.26960 | 342.27701 | [M-H]-    | 0.413 |
| C20H35NO   | 1 | 342.22000 | 305.27186 | [M-2H+K]- | 1.356 |
| C19H2006   | 1 | 343.11870 | 344.12599 | [M-H]-    | 0.058 |
| C21H2804   | 1 | 343.19140 | 344.19876 | [M-H]-    | 0.265 |
| C20H3202   | 1 | 343.20380 | 304.24023 | [M+K]+    | 1.221 |
| C22H3203   | 2 | 343.22790 | 344.23515 | [M-H]-    | 0.070 |
| C19H3405   | 1 | 343.24870 | 342.24063 | [M+H]+    | 2.342 |
| C19H3605   | 1 | 343.24910 | 344.25628 | [M-H]-    | 0.274 |
| C21H3602   | 1 | 343.26020 | 320.27153 | [M+Na]+   | 1.608 |
| C23H3602   | 2 | 343.26430 | 344.27153 | [M-H]-    | 0.114 |
| C20H3804   | 1 | 343.28540 | 342.27701 | [M+H]+    | 3.260 |
| C18H29NO3  | 1 | 344.16280 | 307.21474 | [M-2H+K]- | 1.581 |
| C19H33NO2  | 1 | 344.19930 | 307.25113 | [M-2H+K]- | 1.246 |
| C19H2206   | 1 | 345.13430 | 346.14164 | [M-H]-    | 0.203 |
| C16H2408   | 1 | 345.15400 | 344.14712 | [M+H]+    | 1.130 |
| C20H2605   | 1 | 345.17060 | 346.17803 | [M-H]-    | 0.449 |
| C21H3004   | 1 | 345.20700 | 346.21441 | [M-H]-    | 0.408 |
| C22H3403   | 2 | 345.24340 | 346.25080 | [M-H]-    | 0.365 |
| C23H3802   | 1 | 345.28000 | 346.28718 | [M-H]-    | 0.258 |
| C19H35NO2  | 1 | 346.21500 | 309.26678 | [M-2H+K]- | 1.095 |
| C22H35NO2  | 1 | 346.27520 | 345.26678 | [M+H]+    | 3.324 |
| C23H39NO   | 2 | 346.31030 | 345.30316 | [M+H]+    | 0.387 |
| C19H2406   | 2 | 347.14990 | 348.15729 | [M-H]-    | 0.346 |
| C20H2805   | 2 | 347.18630 | 348.19368 | [M-H]-    | 0.305 |
| C24H2802   | 2 | 347.20150 | 348.20893 | [M-H]-    | 0.461 |
| C21H3204   | 2 | 347.22280 | 348.23006 | [M-H]-    | 0.026 |
| C23H4002   | 1 | 347.29560 | 348.30283 | [M-H]-    | 0.112 |
| C25H46     | 1 | 347.36620 | 346.35995 | [M+H]+    | 2.939 |
| C19H37NO2  | 1 | 348.23070 | 311.28243 | [M-2H+K]- | 0.945 |
| C19H35NO2  | 1 | 348.23090 | 309.26678 | [M+K]+    | 2.788 |
| C22H39NO2  | 1 | 348.29080 | 349.29808 | [M-H]-    | 0.026 |
| C19H2606   | 1 | 349.16570 | 350.17294 | [M-H]-    | 0.086 |
| C22H300    | 1 | 349.19330 | 310.22967 | [M+K]+    | 1.386 |
| C18H3005   | 1 | 349.19780 | 326.20933 | [M+Na]+   | 2.139 |
| C20H3005   | 2 | 349.20200 | 350.20933 | [M-H]-    | 0.160 |
| C21H3404   | 3 | 349.23840 | 350.24571 | [M-H]-    | 0.117 |
| C22H3803   | 1 | 349.27470 | 350.28210 | [M-H]-    | 0.361 |
| C21H4202   | 2 | 349.30720 | 326.31848 | [M+Na]+   | 1.437 |
| C23H4202   | 1 | 349.31120 | 350.31848 | [M-H]-    | 0.031 |
| C18H35NO3  | 1 | 350.21000 | 313.26169 | [M-2H+K]- | 0.839 |
| C16H34NO5P | 1 | 350.21000 | 351.21746 | [M-H]-    | 0.548 |
| C18H33NO4  | 1 | 350.22860 | 327.24096 | [M+Na]+   | 4.511 |
| C22H41NO2  | 1 | 350.30640 | 351.31373 | [M-H]-    | 0.168 |
| C20H3205   | 2 | 351.21770 | 352.22498 | [M-H]-    | 0.017 |
| C22H3202   | 2 | 351.22880 | 328.24023 | [M+Na]+   | 1.856 |
| C21H3604   | 1 | 351.25400 | 352.26136 | [M-H]-    | 0.259 |
| C23H4402   | 2 | 351.32680 | 352.33413 | [M-H]-    | 0.174 |

|            |   |           |           |                        |       |
|------------|---|-----------|-----------|------------------------|-------|
| C25H50     | 1 | 351.39780 | 350.39125 | [M+H] <sup>+</sup>     | 2.052 |
| C17H37NO4S | 1 | 352.25130 | 351.24433 | [M+H] <sup>+</sup>     | 0.857 |
| C22H43NO2  | 1 | 352.32210 | 353.32938 | [M-H] <sup>-</sup>     | 0.026 |
| C15H23BrO2 | 1 | 353.05070 | 314.08814 | [M+K] <sup>+</sup>     | 1.671 |
| C19H30O6   | 1 | 353.19700 | 354.20424 | [M-H] <sup>-</sup>     | 0.082 |
| C23H30O3   | 1 | 353.21220 | 354.21950 | [M-H] <sup>-</sup>     | 0.074 |
| C20H34O5   | 2 | 353.23330 | 354.24063 | [M-H] <sup>-</sup>     | 0.159 |
| C24H34O2   | 2 | 353.24860 | 354.25588 | [M-H] <sup>-</sup>     | 0.031 |
| C21H38O4   | 2 | 353.26970 | 354.27701 | [M-H] <sup>-</sup>     | 0.116 |
| C22H42O3   | 1 | 353.30600 | 354.31340 | [M-H] <sup>-</sup>     | 0.357 |
| C23H44O2   | 1 | 353.34130 | 352.33413 | [M+H] <sup>+</sup>     | 0.286 |
| C23H46O2   | 1 | 353.34240 | 354.34978 | [M-H] <sup>-</sup>     | 0.314 |
| C21H35NO   | 1 | 354.21990 | 317.27186 | [M-2H+K] <sup>-</sup>  | 1.592 |
| C22H37NO   | 1 | 354.27630 | 331.28751 | [M+Na] <sup>+</sup>    | 1.228 |
| C22H43NO2  | 1 | 354.33690 | 353.32938 | [M+H] <sup>+</sup>     | 0.708 |
| C20H30O3   | 3 | 355.16780 | 318.21950 | [M-2H+K] <sup>-</sup>  | 0.833 |
| C20H28O4   | 1 | 355.18820 | 332.19876 | [M+Na] <sup>+</sup>    | 0.614 |
| C15H31O7P  | 1 | 355.18820 | 354.18074 | [M+H] <sup>+</sup>     | 0.526 |
| C19H32O6   | 1 | 355.21250 | 356.21989 | [M-H] <sup>-</sup>     | 0.341 |
| C23H32O3   | 1 | 355.22780 | 356.23515 | [M-H] <sup>-</sup>     | 0.214 |
| C18H36O5   | 1 | 355.24490 | 332.25628 | [M+Na] <sup>+</sup>    | 1.681 |
| C20H36O5   | 1 | 355.24890 | 356.25628 | [M-H] <sup>-</sup>     | 0.298 |
| C24H36O2   | 2 | 355.26410 | 356.27153 | [M-H] <sup>-</sup>     | 0.453 |
| C21H40O4   | 2 | 355.28520 | 356.29266 | [M-H] <sup>-</sup>     | 0.538 |
| C25H38O    | 1 | 355.29980 | 354.29227 | [M+H] <sup>+</sup>     | 0.743 |
| C25H40O    | 2 | 355.30050 | 356.30792 | [M-H] <sup>-</sup>     | 0.411 |
| C22H44O3   | 1 | 355.32160 | 356.32905 | [M-H] <sup>-</sup>     | 0.495 |
| C20H33NO2  | 1 | 356.19930 | 319.25113 | [M-2H+K] <sup>-</sup>  | 1.204 |
| C18H39NO3  | 3 | 356.25740 | 317.29299 | [M+K] <sup>+</sup>     | 3.526 |
| C16H31BrO  | 2 | 357.11820 | 318.15583 | [M+K] <sup>+</sup>     | 2.170 |
| C16H20O9   | 2 | 357.11820 | 356.11074 | [M+H] <sup>+</sup>     | 0.546 |
| C21H26O5   | 1 | 357.17060 | 358.17803 | [M-H] <sup>-</sup>     | 0.434 |
| C22H30O4   | 2 | 357.20710 | 358.21441 | [M-H] <sup>-</sup>     | 0.115 |
| C21H34O2   | 1 | 357.21920 | 318.25588 | [M+K] <sup>+</sup>     | 0.473 |
| C23H34O3   | 1 | 357.24350 | 358.25080 | [M-H] <sup>-</sup>     | 0.073 |
| C20H36O5   | 1 | 357.26230 | 356.25628 | [M+H] <sup>+</sup>     | 3.488 |
| C20H38O5   | 1 | 357.26490 | 358.27193 | [M-H] <sup>-</sup>     | 0.683 |
| C22H38O2   | 1 | 357.27680 | 334.28718 | [M+Na] <sup>+</sup>    | 1.114 |
| C24H38O2   | 3 | 357.28000 | 358.28718 | [M-H] <sup>-</sup>     | 0.249 |
| C25H42O    | 1 | 357.31650 | 358.32357 | [M-H] <sup>-</sup>     | 0.571 |
| C20H35NO2  | 1 | 358.21480 | 321.26678 | [M-2H+K] <sup>-</sup>  | 1.616 |
| C19H20O7   | 1 | 359.11340 | 360.12091 | [M-H] <sup>-</sup>     | 0.654 |
| C21H28O5   | 1 | 359.18630 | 360.19368 | [M-H] <sup>-</sup>     | 0.295 |
| C22H32O4   | 1 | 359.22260 | 360.23006 | [M-H] <sup>-</sup>     | 0.532 |
| C23H36O3   | 1 | 359.25890 | 360.26645 | [M-H] <sup>-</sup>     | 0.768 |
| C24H40O2   | 3 | 359.29530 | 360.30283 | [M-H] <sup>-</sup>     | 0.726 |
| C22H29NO2  | 1 | 360.19410 | 339.21983 | [M-2H+Na] <sup>-</sup> | 1.080 |
| C20H35NO2  | 1 | 360.22970 | 321.26678 | [M+K] <sup>+</sup>     | 0.636 |
| C20H37NO2  | 1 | 360.23060 | 323.28243 | [M-2H+K] <sup>-</sup>  | 1.191 |
| C24H41NO   | 1 | 360.32680 | 359.31881 | [M+H] <sup>+</sup>     | 1.987 |
| C19H22O7   | 1 | 361.12910 | 362.13656 | [M-H] <sup>-</sup>     | 0.512 |
| C20H26O6   | 1 | 361.16550 | 362.17294 | [M-H] <sup>-</sup>     | 0.471 |
| C21H30O5   | 1 | 361.20190 | 362.20933 | [M-H] <sup>-</sup>     | 0.432 |



|            |   |           |           |            |       |
|------------|---|-----------|-----------|------------|-------|
| C22H34O4   | 1 | 361.23820 | 362.24571 | [M-H]-     | 0.667 |
| C23H38O3   | 1 | 361.27480 | 362.28210 | [M-H]-     | 0.072 |
| C24H40O2   | 1 | 361.30840 | 360.30283 | [M+H]+     | 4.708 |
| C22H42O2   | 1 | 361.30840 | 338.31848 | [M+Na]+    | 1.932 |
| C24H42O2   | 2 | 361.31100 | 362.31848 | [M-H]-     | 0.584 |
| C18H31NO4  | 1 | 362.17350 | 325.22531 | [M-2H+K]-  | 1.129 |
| C20H39NO2  | 1 | 362.24610 | 325.29808 | [M-2H+K]-  | 1.598 |
| C19H24O7   | 1 | 363.14480 | 364.15221 | [M-H]-     | 0.372 |
| C18H28O5   | 1 | 363.15820 | 324.19368 | [M+K]+     | 3.783 |
| C20H28O6   | 1 | 363.18110 | 364.18859 | [M-H]-     | 0.609 |
| C19H34O4   | 1 | 363.19300 | 326.24571 | [M-2H+K]-  | 3.610 |
| C22H30O3   | 2 | 363.19300 | 342.21950 | [M-2H+Na]- | 3.183 |
| C23H32O    | 1 | 363.20760 | 324.24532 | [M+K]+     | 2.384 |
| C21H32O5   | 1 | 363.21760 | 364.22498 | [M-H]-     | 0.292 |
| C25H32O2   | 1 | 363.23270 | 364.24023 | [M-H]-     | 0.719 |
| C20H36O4   | 1 | 363.25210 | 340.26136 | [M+Na]+    | 4.179 |
| C22H34O4   | 2 | 363.25210 | 362.24571 | [M+H]+     | 2.425 |
| C22H36O4   | 1 | 363.25390 | 364.26136 | [M-H]-     | 0.526 |
| C21H40O2   | 4 | 363.26450 | 324.30283 | [M+K]+     | 4.077 |
| C23H40O3   | 2 | 363.29040 | 364.29775 | [M-H]-     | 0.209 |
| C24H44O2   | 1 | 363.32670 | 364.33413 | [M-H]-     | 0.443 |
| C18H33NO4  | 1 | 364.18890 | 327.24096 | [M-2H+K]-  | 1.809 |
| C19H37NO3  | 1 | 364.22520 | 327.27734 | [M-2H+K]-  | 2.043 |
| C17H36NO5P | 1 | 364.22520 | 365.23311 | [M-H]-     | 1.763 |
| C20H30O6   | 2 | 365.19680 | 366.20424 | [M-H]-     | 0.468 |
| C21H34O5   | 2 | 365.23330 | 366.24063 | [M-H]-     | 0.153 |
| C24H46O2   | 1 | 365.34250 | 366.34978 | [M-H]-     | 0.030 |
| C20H43NO2  | 1 | 366.27760 | 329.32938 | [M-2H+K]-  | 1.035 |
| C23H39NO   | 1 | 366.27760 | 345.30316 | [M-2H+Na]- | 0.612 |
| C22H41NO3  | 1 | 366.30120 | 367.30864 | [M-H]-     | 0.475 |
| C19H20O6   | 1 | 367.11620 | 344.12599 | [M+Na]+    | 2.694 |
| C16H24O7   | 1 | 367.11620 | 328.15221 | [M+K]+     | 2.302 |
| C20H32O6   | 2 | 367.21260 | 368.21989 | [M-H]-     | 0.057 |
| C22H32O3   | 1 | 367.22270 | 344.23515 | [M+Na]+    | 4.539 |
| C24H32O3   | 1 | 367.22780 | 368.23515 | [M-H]-     | 0.207 |
| C19H36O5   | 1 | 367.24430 | 344.25628 | [M+Na]+    | 3.259 |
| C21H36O5   | 1 | 367.24890 | 368.25628 | [M-H]-     | 0.289 |
| C21H34O5   | 2 | 367.24930 | 366.24063 | [M+H]+     | 3.823 |
| C25H36O2   | 1 | 367.26430 | 368.27153 | [M-H]-     | 0.106 |
| C23H44O3   | 1 | 367.32180 | 368.32905 | [M-H]-     | 0.065 |
| C24H48O2   | 1 | 367.35810 | 368.36543 | [M-H]-     | 0.166 |
| C22H37NO   | 1 | 368.23560 | 331.28751 | [M-2H+K]-  | 1.396 |
| C22H43NO3  | 2 | 368.31700 | 369.32429 | [M-H]-     | 0.065 |
| C21H30O3   | 1 | 369.18260 | 330.21950 | [M+K]+     | 0.125 |
| C20H34O6   | 1 | 369.22830 | 370.23554 | [M-H]-     | 0.079 |
| C24H34O3   | 1 | 369.24350 | 370.25080 | [M-H]-     | 0.070 |
| C22H42O4   | 1 | 369.30110 | 370.30831 | [M-H]-     | 0.160 |
| C25H46     | 2 | 369.34780 | 346.35995 | [M+Na]+    | 3.715 |
| C27H44     | 1 | 369.35020 | 368.34430 | [M+H]+     | 3.712 |
| C22H36FNO  | 1 | 370.25130 | 349.27809 | [M-2H+Na]- | 3.924 |
| C22H37NO2  | 1 | 370.27110 | 347.28243 | [M+Na]+    | 1.485 |
| C20H28O4   | 3 | 371.16270 | 332.19876 | [M+K]+     | 2.126 |
| C22H28O5   | 2 | 371.18620 | 372.19368 | [M-H]-     | 0.555 |

|            |   |           |           |            |       |
|------------|---|-----------|-----------|------------|-------|
| C20H36O6   | 1 | 371.24390 | 372.25119 | [M-H]-     | 0.057 |
| C24H36O3   | 1 | 371.25910 | 372.26645 | [M-H]-     | 0.205 |
| C23H40O2   | 1 | 371.29050 | 348.30283 | [M+Na]+    | 4.180 |
| C25H40O2   | 1 | 371.29570 | 372.30283 | [M-H]-     | 0.374 |
| C26H44O    | 1 | 371.33170 | 372.33922 | [M-H]-     | 0.662 |
| C23H46O3   | 1 | 371.35360 | 370.34470 | [M+H]+     | 4.400 |
| C25H48     | 1 | 371.36340 | 348.37560 | [M+Na]+    | 3.829 |
| C22H30O5   | 3 | 373.20180 | 374.20933 | [M-H]-     | 0.686 |
| C21H34O4   | 1 | 373.23470 | 350.24571 | [M+Na]+    | 0.622 |
| C23H34O4   | 1 | 373.23820 | 374.24571 | [M-H]-     | 0.646 |
| C24H38O3   | 1 | 373.27460 | 374.28210 | [M-H]-     | 0.605 |
| C23H42O2   | 1 | 373.30920 | 350.31848 | [M+Na]+    | 4.013 |
| C25H40O2   | 1 | 373.30920 | 372.30283 | [M+H]+     | 2.414 |
| C25H42O2   | 2 | 373.31110 | 374.31848 | [M-H]-     | 0.297 |
| C26H44O    | 1 | 373.34620 | 372.33922 | [M+H]+     | 0.766 |
| C22H41NO2  | 3 | 374.30290 | 351.31373 | [M+Na]+    | 0.134 |
| C24H39NO2  | 2 | 374.30600 | 373.29808 | [M+H]+     | 1.739 |
| C21H28O6   | 1 | 375.18130 | 376.18859 | [M-H]-     | 0.056 |
| C20H32O5   | 1 | 375.21390 | 352.22498 | [M+Na]+    | 0.792 |
| C22H32O5   | 2 | 375.21760 | 376.22498 | [M-H]-     | 0.283 |
| C23H36O4   | 1 | 375.25390 | 376.26136 | [M-H]-     | 0.509 |
| C22H40O2   | 1 | 375.26650 | 336.30283 | [M+K]+     | 1.383 |
| C24H40O3   | 1 | 375.29030 | 376.29775 | [M-H]-     | 0.469 |
| C25H44O2   | 1 | 375.32660 | 376.33413 | [M-H]-     | 0.695 |
| C22H29NO2  | 1 | 376.16800 | 339.21983 | [M-2H+K]-  | 1.140 |
| C20H37NO3  | 1 | 376.22530 | 339.27734 | [M-2H+K]-  | 1.712 |
| C22H43NO2  | 3 | 376.31860 | 353.32938 | [M+Na]+    | 0.000 |
| C24H41NO2  | 1 | 376.31960 | 375.31373 | [M+H]+     | 3.718 |
| C20H26O7   | 1 | 377.16040 | 378.16786 | [M-H]-     | 0.493 |
| C21H30O6   | 1 | 377.19690 | 378.20424 | [M-H]-     | 0.188 |
| C20H34O5   | 1 | 377.22860 | 354.24063 | [M+Na]+    | 3.306 |
| C22H34O5   | 2 | 377.23320 | 378.24063 | [M-H]-     | 0.414 |
| C23H38O4   | 3 | 377.26970 | 378.27701 | [M-H]-     | 0.109 |
| C24H42O3   | 1 | 377.30600 | 378.31340 | [M-H]-     | 0.334 |
| C25H46O2   | 2 | 377.34250 | 378.34978 | [M-H]-     | 0.029 |
| C22H44FNO  | 1 | 378.31390 | 357.34069 | [M-2H+Na]- | 3.841 |
| C18H28O6   | 1 | 379.15030 | 340.18859 | [M+K]+     | 3.801 |
| C21H29FO5  | 1 | 379.19130 | 380.19990 | [M-H]-     | 3.518 |
| C24H28O4   | 1 | 379.19130 | 380.19876 | [M-H]-     | 0.504 |
| C22H34O5   | 1 | 379.24830 | 378.24063 | [M+H]+     | 1.065 |
| C22H36O5   | 2 | 379.24870 | 380.25628 | [M-H]-     | 0.807 |
| C21H44NO2  | 1 | 379.28520 | 342.33720 | [M-2H+K]-  | 1.592 |
| C23H40O4   | 2 | 379.28520 | 380.29266 | [M-H]-     | 0.504 |
| C24H44O3   | 1 | 379.32160 | 380.32905 | [M-H]-     | 0.464 |
| C25H48O2   | 2 | 379.35810 | 380.36543 | [M-H]-     | 0.161 |
| C24H41NO   | 1 | 380.29290 | 359.31881 | [M-2H+Na]- | 1.509 |
| C23H41NO3  | 1 | 380.31770 | 379.30864 | [M+H]+     | 4.696 |
| C21H29ClO4 | 2 | 381.18220 | 380.17544 | [M+H]+     | 1.335 |
| C22H30O3   | 2 | 381.18220 | 342.21950 | [M+K]+     | 1.170 |
| C24H30O4   | 1 | 381.20700 | 382.21441 | [M-H]-     | 0.370 |
| C25H34O3   | 1 | 381.24350 | 382.25080 | [M-H]-     | 0.068 |
| C22H38O5   | 1 | 381.26470 | 382.27193 | [M-H]-     | 0.115 |
| C26H38O2   | 1 | 381.27980 | 382.28718 | [M-H]-     | 0.291 |

|            |   |           |           |            |       |
|------------|---|-----------|-----------|------------|-------|
| C23H42O4   | 1 | 381.30090 | 382.30831 | [M-H]-     | 0.370 |
| C27H42O    | 1 | 381.31630 | 382.32357 | [M-H]-     | 0.010 |
| C24H46O3   | 1 | 381.33730 | 382.34470 | [M-H]-     | 0.330 |
| C25H50O2   | 1 | 381.37360 | 382.38108 | [M-H]-     | 0.553 |
| C22H35NO2  | 1 | 382.21480 | 345.26678 | [M-2H+K]-  | 1.515 |
| C19H37NO4  | 1 | 382.23580 | 343.27226 | [M+K]+     | 1.023 |
| C23H39NO   | 1 | 382.25130 | 345.30316 | [M-2H+K]-  | 1.214 |
| C24H32O4   | 1 | 383.22260 | 384.23006 | [M-H]-     | 0.498 |
| C24H30O4   | 1 | 383.22310 | 382.21441 | [M+H]+     | 3.703 |
| C26H40O2   | 1 | 383.29530 | 384.30283 | [M-H]-     | 0.681 |
| C23H44O4   | 1 | 383.31650 | 384.32396 | [M-H]-     | 0.498 |
| C24H48O3   | 1 | 383.35280 | 384.36035 | [M-H]-     | 0.720 |
| C16H34NO7P | 1 | 384.21600 | 383.20729 | [M+H]+     | 3.743 |
| C22H37NO2  | 1 | 384.23040 | 347.28243 | [M-2H+K]-  | 1.637 |
| C23H38FNO  | 1 | 384.26680 | 363.29374 | [M-2H+Na]- | 4.172 |
| C24H49NO2  | 1 | 384.38330 | 383.37633 | [M+H]+     | 0.780 |
| C15H22O9   | 1 | 385.09110 | 346.12639 | [M+K]+     | 4.064 |
| C21H30O4   | 2 | 385.17860 | 346.21441 | [M+K]+     | 2.697 |
| C23H30O5   | 1 | 385.20180 | 386.20933 | [M-H]-     | 0.665 |
| C24H34O4   | 1 | 385.23820 | 386.24571 | [M-H]-     | 0.626 |
| C23H38O3   | 1 | 385.27140 | 362.28210 | [M+Na]+    | 0.215 |
| C26H42O2   | 2 | 385.31110 | 386.31848 | [M-H]-     | 0.288 |
| C27H43F    | 1 | 385.32770 | 386.33488 | [M-H]-     | 0.236 |
| C23H44O4   | 1 | 385.33190 | 384.32396 | [M+H]+     | 1.736 |
| C17H36NO5P | 1 | 386.20960 | 365.23311 | [M-2H+Na]- | 4.733 |
| C22H39NO2  | 1 | 386.24610 | 349.29808 | [M-2H+K]-  | 1.499 |
| C22H28O6   | 1 | 387.18110 | 388.18859 | [M-H]-     | 0.571 |
| C23H32O5   | 2 | 387.21760 | 388.22498 | [M-H]-     | 0.274 |
| C22H38O3   | 1 | 387.23260 | 350.28210 | [M-2H+K]-  | 4.917 |
| C24H36O4   | 1 | 387.25410 | 388.26136 | [M-H]-     | 0.023 |
| C23H40O3   | 1 | 387.28530 | 364.29775 | [M+Na]+    | 4.304 |
| C25H40O3   | 2 | 387.29040 | 388.29775 | [M-H]-     | 0.196 |
| C26H42O2   | 1 | 387.32610 | 386.31848 | [M+H]+     | 0.901 |
| C26H44O2   | 2 | 387.32690 | 388.33413 | [M-H]-     | 0.101 |
| C27H46O    | 1 | 387.36240 | 386.35487 | [M+H]+     | 0.682 |
| C17H38NO5P | 1 | 388.22530 | 367.24876 | [M-2H+Na]- | 4.837 |
| C22H41NO2  | 1 | 388.26170 | 351.31373 | [M-2H+K]-  | 1.620 |
| C17H24O10  | 1 | 389.14590 | 388.13695 | [M+H]+     | 4.317 |
| C22H30O6   | 1 | 389.19700 | 390.20424 | [M-H]-     | 0.075 |
| C23H34O5   | 2 | 389.23320 | 390.24063 | [M-H]-     | 0.401 |
| C24H38O4   | 1 | 389.26960 | 390.27701 | [M-H]-     | 0.362 |
| C23H42O2   | 1 | 389.28270 | 350.31848 | [M+K]+     | 2.746 |
| C25H42O3   | 1 | 389.30600 | 390.31340 | [M-H]-     | 0.324 |
| C24H46O2   | 2 | 389.34050 | 366.34978 | [M+Na]+    | 3.848 |
| C26H44O2   | 1 | 389.34050 | 388.33413 | [M+H]+     | 2.314 |
| C26H46O2   | 1 | 389.34230 | 390.34978 | [M-H]-     | 0.542 |
| C16H36NO5P | 1 | 390.18350 | 353.23311 | [M-2H+K]-  | 4.582 |
| C21H39NO3  | 1 | 390.24100 | 353.29299 | [M-2H+K]-  | 1.522 |
| C20H39NO4S | 1 | 390.26580 | 389.25998 | [M+H]+     | 3.721 |
| C22H43NO2  | 1 | 390.27720 | 353.32938 | [M-2H+K]-  | 1.996 |
| C20H39NO6  | 2 | 390.28580 | 389.27774 | [M+H]+     | 2.027 |
| C22H41NO3  | 1 | 390.29790 | 367.30864 | [M+Na]+    | 0.090 |
| C19H30O6   | 1 | 391.15470 | 354.20424 | [M-2H+K]-  | 4.753 |

|            |   |           |           |            |       |
|------------|---|-----------|-----------|------------|-------|
| C19H30O5S  | 1 | 391.15470 | 370.18140 | [M-2H+Na]- | 3.472 |
| C21H38O4   | 2 | 391.22530 | 354.27701 | [M-2H+K]-  | 0.795 |
| C19H37O6P  | 1 | 391.22530 | 392.23278 | [M-H]-     | 0.532 |
| C24H34O3   | 1 | 391.22530 | 370.25080 | [M-2H+Na]- | 0.399 |
| C21H36O5   | 1 | 391.24480 | 368.25628 | [M+Na]+    | 1.781 |
| C24H40O4   | 1 | 391.28520 | 392.29266 | [M-H]-     | 0.488 |
| C26H48O2   | 1 | 391.35780 | 392.36543 | [M-H]-     | 0.922 |
| C25H52     | 1 | 391.37080 | 352.40690 | [M+K]+     | 1.914 |
| C21H41NO3  | 1 | 392.25690 | 355.30864 | [M-2H+K]-  | 0.877 |
| C19H40NO5P | 1 | 392.25690 | 393.26441 | [M-H]-     | 0.617 |
| C24H37NO2  | 1 | 392.25690 | 371.28243 | [M-2H+Na]- | 0.482 |
| C22H39N3O3 | 1 | 392.29320 | 393.29914 | [M-H]-     | 3.385 |
| C22H45NO2  | 1 | 392.29320 | 355.34503 | [M-2H+K]-  | 1.094 |
| C24H41NO3  | 3 | 392.31400 | 391.30864 | [M+H]+     | 4.879 |
| C22H43NO3  | 3 | 392.31400 | 369.32429 | [M+Na]+    | 1.236 |
| C23H47NO2  | 2 | 392.34940 | 369.36068 | [M+Na]+    | 1.277 |
| C20H26O8   | 1 | 393.15550 | 394.16277 | [M-H]-     | 0.003 |
| C25H30O4   | 1 | 393.20710 | 394.21441 | [M-H]-     | 0.104 |
| C24H34O2   | 1 | 393.22020 | 354.25588 | [M+K]+     | 2.973 |
| C21H38O4   | 1 | 393.23870 | 354.27701 | [M+K]+     | 3.715 |
| C19H37O6P  | 1 | 393.23870 | 392.23278 | [M+H]+     | 3.428 |
| C24H34O3   | 1 | 393.23870 | 370.25080 | [M+Na]+    | 3.349 |
| C23H38O5   | 1 | 393.26450 | 394.27193 | [M-H]-     | 0.397 |
| C27H38O2   | 1 | 393.27970 | 394.28718 | [M-H]-     | 0.537 |
| C24H42O4   | 1 | 393.30080 | 394.30831 | [M-H]-     | 0.613 |
| C23H46O3   | 1 | 393.33350 | 370.34470 | [M+Na]+    | 1.060 |
| C26H50O2   | 2 | 393.37360 | 394.38108 | [M-H]-     | 0.536 |
| C22H44FNO  | 1 | 394.28740 | 357.34069 | [M-2H+K]-  | 4.801 |
| C22H45NO2  | 2 | 394.30660 | 355.34503 | [M+K]+     | 4.004 |
| C22H39N3O3 | 2 | 394.30660 | 393.29914 | [M+H]+     | 0.477 |
| C25H43NO   | 1 | 394.30830 | 373.33446 | [M-2H+Na]- | 2.090 |
| C16H20O9   | 2 | 395.07380 | 356.11074 | [M+K]+     | 0.215 |
| C22H36O6   | 1 | 395.24360 | 396.25119 | [M-H]-     | 0.812 |
| C23H40O5   | 2 | 395.28020 | 396.28758 | [M-H]-     | 0.268 |
| C27H40O2   | 2 | 395.29540 | 396.30283 | [M-H]-     | 0.407 |
| C24H42O4   | 1 | 395.31550 | 394.30831 | [M+H]+     | 0.205 |
| C26H52O2   | 1 | 395.38930 | 396.39673 | [M-H]-     | 0.407 |
| C24H41NO   | 1 | 396.26680 | 359.31881 | [M-2H+K]-  | 1.549 |
| C17H26O9   | 2 | 397.14700 | 374.15769 | [M+Na]+    | 0.234 |
| C24H30O5   | 1 | 397.20180 | 398.20933 | [M-H]-     | 0.645 |
| C25H34O4   | 1 | 397.23820 | 398.24571 | [M-H]-     | 0.607 |
| C26H38O3   | 1 | 397.27460 | 398.28210 | [M-H]-     | 0.569 |
| C22H40N2O4 | 1 | 397.30540 | 396.29881 | [M+H]+     | 1.706 |
| C27H40O2   | 1 | 397.31060 | 396.30283 | [M+H]+     | 1.256 |
| C27H42O2   | 2 | 397.31100 | 398.31848 | [M-H]-     | 0.531 |
| C24H46O4   | 1 | 397.33210 | 398.33961 | [M-H]-     | 0.607 |
| C22H35NO3  | 1 | 398.20970 | 361.26169 | [M-2H+K]-  | 1.492 |
| C23H39NO2  | 1 | 398.24610 | 361.29808 | [M-2H+K]-  | 1.454 |
| C21H28O5   | 1 | 399.15800 | 360.19368 | [M+K]+     | 2.941 |
| C24H32O5   | 1 | 399.21760 | 400.22498 | [M-H]-     | 0.266 |
| C23H36O4   | 1 | 399.24920 | 376.26136 | [M+Na]+    | 3.461 |
| C25H36O4   | 1 | 399.25390 | 400.26136 | [M-H]-     | 0.478 |
| C24H40O2   | 1 | 399.26460 | 360.30283 | [M+K]+     | 3.459 |

|            |   |           |           |            |       |
|------------|---|-----------|-----------|------------|-------|
| C20H41O4P  | 1 | 399.26460 | 376.27425 | [M+Na]+    | 2.833 |
| C26H40O3   | 1 | 399.29020 | 400.29775 | [M-H]-     | 0.691 |
| C27H44O2   | 1 | 399.32660 | 400.33413 | [M-H]-     | 0.654 |
| C18H23O8S  | 1 | 400.11910 | 399.11140 | [M+H]+     | 1.075 |
| C22H37NO3  | 1 | 400.22550 | 363.27734 | [M-2H+K]-  | 1.109 |
| C23H41NO3  | 2 | 400.28290 | 379.30864 | [M-2H+Na]- | 1.009 |
| C20H26O6   | 1 | 401.13550 | 362.17294 | [M+K]+     | 1.471 |
| C21H29FO5  | 1 | 401.17570 | 380.19990 | [M-2H+Na]- | 2.832 |
| C23H30O6   | 1 | 401.19690 | 402.20424 | [M-H]-     | 0.177 |
| C24H34O5   | 1 | 401.23340 | 402.24063 | [M-H]-     | 0.110 |
| C23H38O3   | 1 | 401.24440 | 362.28210 | [M+K]+     | 2.108 |
| C25H38O4   | 3 | 401.26970 | 402.27701 | [M-H]-     | 0.102 |
| C26H40O3   | 1 | 401.30570 | 400.29775 | [M+H]+     | 1.704 |
| C26H42O3   | 1 | 401.30600 | 402.31340 | [M-H]-     | 0.314 |
| C27H46O2   | 2 | 401.34230 | 402.34978 | [M-H]-     | 0.526 |
| C23H41NO3  | 1 | 402.29830 | 379.30864 | [M+Na]+    | 1.081 |
| C23H32O6   | 2 | 403.21250 | 404.21989 | [M-H]-     | 0.300 |
| C24H36O5   | 1 | 403.24880 | 404.25628 | [M-H]-     | 0.511 |
| C25H40O4   | 1 | 403.28540 | 404.29266 | [M-H]-     | 0.022 |
| C26H44O3   | 1 | 403.32170 | 404.32905 | [M-H]-     | 0.188 |
| C27H48O2   | 3 | 403.35810 | 404.36543 | [M-H]-     | 0.151 |
| C26H46N2O  | 1 | 403.36860 | 402.36101 | [M+H]+     | 0.786 |
| C17H38NO5P | 1 | 404.19910 | 367.24876 | [M-2H+K]-  | 4.300 |
| C22H41NO3  | 1 | 404.25650 | 367.30864 | [M-2H+K]-  | 1.840 |
| C22H39NO4  | 1 | 404.27870 | 381.28791 | [M+Na]+    | 3.883 |
| C26H45NO2  | 1 | 404.35210 | 403.34503 | [M+H]+     | 0.492 |
| C22H30O7   | 1 | 405.19190 | 406.19916 | [M-H]-     | 0.035 |
| C17H35O7P  | 1 | 405.19980 | 382.21204 | [M+Na]+    | 3.613 |
| C23H34O6   | 1 | 405.22820 | 406.23554 | [M-H]-     | 0.175 |
| C24H38O5   | 1 | 405.26460 | 406.27193 | [M-H]-     | 0.138 |
| C25H42O4   | 1 | 405.30100 | 406.30831 | [M-H]-     | 0.101 |
| C25H50O    | 1 | 405.34950 | 366.38617 | [M+K]+     | 0.454 |
| C30H44     | 1 | 405.35200 | 404.34430 | [M+H]+     | 1.058 |
| C27H50O2   | 1 | 405.37370 | 406.38108 | [M-H]-     | 0.274 |
| C17H19O8S  | 1 | 406.07060 | 383.08010 | [M+Na]+    | 3.150 |
| C22H43NO3  | 2 | 406.27230 | 369.32429 | [M-2H+K]-  | 1.462 |
| C24H39NO4  | 1 | 406.29510 | 405.28791 | [M+H]+     | 0.194 |
| C23H47NO2  | 1 | 406.30870 | 369.36068 | [M-2H+K]-  | 1.427 |
| C26H43NO   | 1 | 406.30870 | 385.33446 | [M-2H+Na]- | 1.044 |
| C26H32O4   | 1 | 407.22260 | 408.23006 | [M-H]-     | 0.469 |
| C25H36O2   | 2 | 407.23350 | 368.27153 | [M+K]+     | 2.900 |
| C23H36O6   | 1 | 407.24370 | 408.25119 | [M-H]-     | 0.543 |
| C22H42O4   | 1 | 407.25890 | 370.30831 | [M-2H+K]-  | 4.884 |
| C24H40O5   | 1 | 407.28000 | 408.28758 | [M-H]-     | 0.751 |
| C23H46O3   | 1 | 407.29530 | 370.34470 | [M-2H+K]-  | 4.920 |
| C28H40O2   | 1 | 407.29530 | 408.30283 | [M-H]-     | 0.641 |
| C27H44O    | 1 | 407.32770 | 384.33922 | [M+Na]+    | 1.809 |
| C24H48O2   | 2 | 407.32910 | 368.36543 | [M+K]+     | 1.274 |
| C26H48O3   | 1 | 407.35280 | 408.36035 | [M-H]-     | 0.678 |
| C27H52O2   | 1 | 407.38920 | 408.39673 | [M-H]-     | 0.641 |
| C16H17O8S  | 1 | 408.02860 | 369.06440 | [M+K]+     | 2.573 |
| C24H37NO2  | 1 | 408.23050 | 371.28243 | [M-2H+K]-  | 1.296 |
| C26H45NO   | 1 | 408.32450 | 387.35011 | [M-2H+Na]- | 0.671 |

|            |   |           |           |            |       |
|------------|---|-----------|-----------|------------|-------|
| C19H30O5S  | 1 | 409.14630 | 370.18140 | [M+K]+     | 4.282 |
| C22H34O7   | 1 | 409.22350 | 410.23046 | [M-H]-     | 0.767 |
| C19H39O7P  | 1 | 409.23550 | 410.24334 | [M-H]-     | 1.400 |
| C24H36O4   | 1 | 409.23550 | 388.26136 | [M-2H+Na]- | 1.273 |
| C23H38O6   | 1 | 409.25960 | 410.26684 | [M-H]-     | 0.071 |
| C27H38O3   | 1 | 409.27490 | 410.28210 | [M-H]-     | 0.181 |
| C24H40O5   | 1 | 409.29670 | 408.28758 | [M+H]+     | 4.530 |
| C28H42O2   | 2 | 409.31120 | 410.31848 | [M-H]-     | 0.027 |
| C27H43F    | 1 | 409.32570 | 386.33488 | [M+Na]+    | 3.909 |
| C24H50O2   | 1 | 409.34450 | 370.38108 | [M+K]+     | 0.657 |
| C26H50O3   | 1 | 409.36870 | 410.37600 | [M-H]-     | 0.064 |
| C27H52O2   | 1 | 409.40410 | 408.39673 | [M+H]+     | 0.242 |
| C27H54O2   | 1 | 409.40500 | 410.41238 | [M-H]-     | 0.271 |
| C16H19O8S  | 1 | 410.04450 | 371.08010 | [M+K]+     | 3.048 |
| C24H39NO2  | 1 | 410.24620 | 373.29808 | [M-2H+K]-  | 1.168 |
| C25H43NO   | 1 | 410.28270 | 373.33446 | [M-2H+K]-  | 0.887 |
| C27H38O3   | 1 | 411.29030 | 410.28210 | [M+H]+     | 2.271 |
| C27H40O3   | 1 | 411.29030 | 412.29775 | [M-H]-     | 0.428 |
| C28H44O2   | 2 | 411.32680 | 412.33413 | [M-H]-     | 0.148 |
| C29H46O    | 1 | 411.36280 | 410.35487 | [M+H]+     | 1.614 |
| C18H19O9S  | 1 | 412.08270 | 411.07500 | [M+H]+     | 1.043 |
| C23H37NO3  | 1 | 412.22540 | 375.27734 | [M-2H+K]-  | 1.320 |
| C24H41NO2  | 1 | 412.26180 | 375.31373 | [M-2H+K]-  | 1.283 |
| C24H39NO3  | 2 | 412.28020 | 389.29299 | [M+Na]+    | 4.887 |
| C22H30O6   | 1 | 413.19370 | 390.20424 | [M+Na]+    | 0.576 |
| C21H32O6S  | 1 | 413.19980 | 412.19196 | [M+H]+     | 1.372 |
| C23H34O4   | 1 | 413.20690 | 374.24571 | [M+K]+     | 4.746 |
| C23H34O5   | 1 | 413.23040 | 390.24063 | [M+Na]+    | 1.338 |
| C24H38O4   | 3 | 413.26630 | 390.27701 | [M+Na]+    | 0.165 |
| C27H42O3   | 1 | 413.30600 | 414.31340 | [M-H]-     | 0.305 |
| C28H46O2   | 2 | 413.34230 | 414.34978 | [M-H]-     | 0.510 |
| C28H44O2   | 1 | 413.34330 | 412.33413 | [M+H]+     | 4.594 |
| C22H35NO4  | 1 | 414.20470 | 377.25661 | [M-2H+K]-  | 1.229 |
| C19H40NO5P | 1 | 414.24100 | 393.26441 | [M-2H+Na]- | 4.654 |
| C23H39NO3  | 1 | 414.24100 | 377.29299 | [M-2H+K]-  | 1.434 |
| C22H39N3O3 | 1 | 414.27300 | 393.29914 | [M-2H+Na]- | 1.936 |
| C26H39NO3  | 1 | 414.30210 | 413.29299 | [M+H]+     | 4.432 |
| C23H43NO3S | 1 | 414.30210 | 413.29637 | [M+H]+     | 3.710 |
| C27H43NO2  | 1 | 414.33810 | 413.32938 | [M+H]+     | 3.502 |
| C25H30O4   | 1 | 415.19090 | 394.21441 | [M-2H+Na]- | 4.405 |
| C22H34O5   | 2 | 415.19090 | 378.24063 | [M-2H+K]-  | 4.032 |
| C22H34O4S  | 1 | 415.19090 | 394.21778 | [M-2H+Na]- | 3.716 |
| C24H32O6   | 2 | 415.21250 | 416.21989 | [M-H]-     | 0.291 |
| C23H36O4   | 2 | 415.22260 | 376.26136 | [M+K]+     | 4.602 |
| C19H37O6P  | 5 | 415.22260 | 392.23278 | [M+Na]+    | 1.447 |
| C25H36O5   | 1 | 415.24870 | 416.25628 | [M-H]-     | 0.737 |
| C24H40O4   | 1 | 415.28110 | 392.29266 | [M+Na]+    | 1.883 |
| C26H40O4   | 1 | 415.28510 | 416.29266 | [M-H]-     | 0.701 |
| C27H44O3   | 1 | 415.32150 | 416.32905 | [M-H]-     | 0.665 |
| C28H48O2   | 2 | 415.35800 | 416.36543 | [M-H]-     | 0.388 |
| C30H54     | 1 | 415.42950 | 414.42255 | [M+H]+     | 0.773 |
| C18H38NO6P | 1 | 416.22020 | 395.24368 | [M-2H+Na]- | 4.476 |
| C22H37NO4  | 1 | 416.22020 | 379.27226 | [M-2H+K]-  | 1.583 |

|            |   |           |           |            |       |
|------------|---|-----------|-----------|------------|-------|
| C23H41NO3  | 2 | 416.25660 | 379.30864 | [M-2H+K]-  | 1.547 |
| C27H45NO2  | 1 | 416.35410 | 415.34503 | [M+H]+     | 4.326 |
| C20H26O8   | 1 | 417.15290 | 394.16277 | [M+Na]+    | 2.177 |
| C25H36O5   | 1 | 417.26400 | 416.25628 | [M+H]+     | 1.088 |
| C26H42O4   | 2 | 417.30090 | 418.30831 | [M-H]-     | 0.338 |
| C27H46O3   | 1 | 417.33720 | 418.34470 | [M-H]-     | 0.542 |
| C28H50O2   | 3 | 417.37380 | 418.38108 | [M-H]-     | 0.026 |
| C18H40NO5P | 1 | 418.21460 | 381.26441 | [M-2H+K]-  | 3.797 |
| C22H37NO4  | 1 | 418.23520 | 379.27226 | [M+K]+     | 0.500 |
| C22H39NO4  | 1 | 418.23610 | 381.28791 | [M-2H+K]-  | 0.978 |
| C23H41NO3  | 1 | 418.27210 | 379.30864 | [M+K]+     | 0.732 |
| C23H43NO3  | 1 | 418.27230 | 381.32429 | [M-2H+K]-  | 1.420 |
| C21H39NO7  | 1 | 418.27870 | 417.27265 | [M+H]+     | 2.926 |
| C24H41N3O3 | 1 | 418.30880 | 419.31479 | [M-H]-     | 3.055 |
| C24H47NO2  | 1 | 418.30880 | 381.36068 | [M-2H+K]-  | 1.147 |
| C27H43NO   | 1 | 418.30880 | 397.33446 | [M-2H+Na]- | 0.775 |
| C24H45NO3  | 1 | 418.32820 | 395.33994 | [M+Na]+    | 2.307 |
| C18H37O7P  | 1 | 419.21610 | 396.22769 | [M+Na]+    | 1.942 |
| C22H38O5   | 1 | 419.22260 | 382.27193 | [M-2H+K]-  | 4.947 |
| C23H40O5   | 1 | 419.27690 | 396.28758 | [M+Na]+    | 0.246 |
| C29H40O2   | 1 | 419.29540 | 420.30283 | [M-H]-     | 0.384 |
| C26H44O4   | 1 | 419.31650 | 420.32396 | [M-H]-     | 0.456 |
| C25H48O2   | 1 | 419.33020 | 380.36543 | [M+K]+     | 3.861 |
| C30H42O    | 1 | 419.33020 | 418.32357 | [M+H]+     | 1.517 |
| C27H46O3   | 1 | 419.35240 | 418.34470 | [M+H]+     | 1.035 |
| C27H48O3   | 1 | 419.35290 | 420.36035 | [M-H]-     | 0.420 |
| C26H52O2   | 1 | 419.38500 | 396.39673 | [M+Na]+    | 2.270 |
| C28H52O2   | 2 | 419.38930 | 420.39673 | [M-H]-     | 0.384 |
| C27H56O    | 1 | 419.42150 | 396.43312 | [M+Na]+    | 1.996 |
| C23H45NO3  | 1 | 420.28800 | 383.33994 | [M-2H+K]-  | 1.294 |
| C24H43N3O3 | 1 | 420.32450 | 421.33044 | [M-H]-     | 3.159 |
| C24H49NO2  | 1 | 420.32450 | 383.37633 | [M-2H+K]-  | 1.023 |
| C27H45NO   | 1 | 420.32450 | 399.35011 | [M-2H+Na]- | 0.652 |
| C27H46FNO  | 1 | 420.36490 | 419.35634 | [M+H]+     | 3.062 |
| C25H51NO2  | 1 | 420.38240 | 397.39198 | [M+Na]+    | 2.852 |
| C15H28O7P2 | 1 | 421.09480 | 382.13103 | [M+K]+     | 1.470 |
| C23H31FO6  | 1 | 421.20180 | 422.21047 | [M-H]-     | 3.321 |
| C24H38O6   | 1 | 421.25930 | 422.26684 | [M-H]-     | 0.643 |
| C23H42O4   | 1 | 421.27020 | 382.30831 | [M+K]+     | 2.993 |
| C21H41O6P  | 1 | 421.27020 | 420.26408 | [M+H]+     | 2.725 |
| C26H38O3   | 1 | 421.27020 | 398.28210 | [M+Na]+    | 2.651 |
| C23H44O4   | 1 | 421.27460 | 384.32396 | [M-2H+K]-  | 4.840 |
| C28H38O3   | 1 | 421.27460 | 422.28210 | [M-H]-     | 0.536 |
| C25H42O5   | 1 | 421.29580 | 422.30323 | [M-H]-     | 0.370 |
| C24H46O4   | 1 | 421.32880 | 398.33961 | [M+Na]+    | 0.076 |
| C26H44O4   | 1 | 421.33190 | 420.32396 | [M+H]+     | 1.588 |
| C28H54O2   | 2 | 421.40500 | 422.41238 | [M-H]-     | 0.263 |
| C17H21O8S  | 1 | 422.04520 | 385.09570 | [M-2H+K]-  | 2.132 |
| C22H41NO4  | 1 | 422.26740 | 383.30356 | [M+K]+     | 1.636 |
| C26H43NO   | 1 | 422.28230 | 385.33446 | [M-2H+K]-  | 1.809 |
| C23H45NO3  | 1 | 422.30460 | 383.33994 | [M+K]+     | 3.566 |
| C24H49NO2  | 1 | 422.33810 | 383.37633 | [M+K]+     | 3.268 |
| C27H45NO   | 1 | 422.33810 | 399.35011 | [M+Na]+    | 2.924 |

|            |   |           |           |                        |       |
|------------|---|-----------|-----------|------------------------|-------|
| C24H43N3O3 | 1 | 422.33810 | 421.33044 | [M+H] <sup>+</sup>     | 0.919 |
| C27H47NO   | 1 | 422.33970 | 401.36576 | [M-2H+Na] <sup>-</sup> | 1.714 |
| C24H40O6   | 1 | 423.27540 | 424.28249 | [M-H] <sup>-</sup>     | 0.423 |
| C24H38O6   | 1 | 423.27590 | 422.26684 | [M+H] <sup>+</sup>     | 4.227 |
| C25H41FO4  | 1 | 423.29050 | 424.29889 | [M-H] <sup>-</sup>     | 2.644 |
| C28H40O3   | 1 | 423.29050 | 424.29775 | [M-H] <sup>-</sup>     | 0.057 |
| C24H48O3   | 1 | 423.32190 | 384.36035 | [M+K] <sup>+</sup>     | 3.770 |
| C29H44O2   | 1 | 423.32680 | 424.33413 | [M-H] <sup>-</sup>     | 0.144 |
| C28H56O2   | 1 | 423.42070 | 424.42803 | [M-H] <sup>-</sup>     | 0.144 |
| C26H45NO   | 1 | 424.29820 | 387.35011 | [M-2H+K] <sup>-</sup>  | 1.211 |
| C28H41NO2  | 1 | 424.32190 | 423.31373 | [M+H] <sup>+</sup>     | 2.123 |
| C27H43N3O  | 1 | 424.33440 | 425.34061 | [M-H] <sup>-</sup>     | 2.493 |
| C21H29BrO4 | 1 | 425.13410 | 424.12492 | [M+H] <sup>+</sup>     | 4.493 |
| C22H32O8   | 1 | 425.21910 | 424.20972 | [M+H] <sup>+</sup>     | 4.960 |
| C19H37O8P  | 1 | 425.23040 | 424.22261 | [M+H] <sup>+</sup>     | 1.228 |
| C27H38O4   | 1 | 425.26970 | 426.27701 | [M-H] <sup>-</sup>     | 0.096 |
| C24H40O6   | 1 | 425.28860 | 424.28249 | [M+H] <sup>+</sup>     | 2.730 |
| C27H43F    | 1 | 425.29980 | 386.33488 | [M+K] <sup>+</sup>     | 4.164 |
| C28H42O3   | 1 | 425.30600 | 426.31340 | [M-H] <sup>-</sup>     | 0.296 |
| C29H46O2   | 1 | 425.34230 | 426.34978 | [M-H] <sup>-</sup>     | 0.496 |
| C26H50O4   | 1 | 425.36340 | 426.37091 | [M-H] <sup>-</sup>     | 0.567 |
| C28H56O2   | 1 | 425.43590 | 424.42803 | [M+H] <sup>+</sup>     | 1.408 |
| C29H60O    | 1 | 425.46990 | 424.46442 | [M+H] <sup>+</sup>     | 4.198 |
| C20H37NO4S | 1 | 426.20640 | 387.24433 | [M+K] <sup>+</sup>     | 2.539 |
| C24H39NO3  | 1 | 426.24130 | 389.29299 | [M-2H+K] <sup>-</sup>  | 0.690 |
| C22H38NO5P | 1 | 426.24130 | 427.24876 | [M-H] <sup>-</sup>     | 0.450 |
| C25H43NO2  | 1 | 426.27750 | 389.32938 | [M-2H+K] <sup>-</sup>  | 1.124 |
| C26H44FNO  | 1 | 426.31410 | 405.34069 | [M-2H+Na] <sup>-</sup> | 2.939 |
| C27H40O4   | 1 | 427.28530 | 428.29266 | [M-H] <sup>-</sup>     | 0.213 |
| C28H44O3   | 1 | 427.32160 | 428.32905 | [M-H] <sup>-</sup>     | 0.412 |
| C27H48O2   | 1 | 427.35630 | 404.36543 | [M+Na] <sup>+</sup>    | 3.856 |
| C29H48O2   | 1 | 427.35800 | 428.36543 | [M-H] <sup>-</sup>     | 0.377 |
| C23H46N4O3 | 1 | 427.36310 | 426.35699 | [M+H] <sup>+</sup>     | 2.717 |
| C23H37NO4  | 1 | 428.22030 | 391.27226 | [M-2H+K] <sup>-</sup>  | 1.305 |
| C20H39NO4S | 1 | 428.22350 | 389.25998 | [M+K] <sup>+</sup>     | 0.859 |
| C24H41NO3  | 1 | 428.25690 | 391.30864 | [M-2H+K] <sup>-</sup>  | 0.803 |
| C25H45NO2  | 1 | 428.29320 | 391.34503 | [M-2H+K] <sup>-</sup>  | 1.002 |
| C25H49NO4  | 1 | 428.37300 | 427.36616 | [M+H] <sup>+</sup>     | 1.004 |
| C22H30O6   | 1 | 429.16740 | 390.20424 | [M+K] <sup>+</sup>     | 0.021 |
| C18H37O9P  | 1 | 429.22440 | 428.21752 | [M+H] <sup>+</sup>     | 0.916 |
| C26H38O5   | 1 | 429.26440 | 430.27193 | [M-H] <sup>-</sup>     | 0.596 |
| C27H42O4   | 1 | 429.30090 | 430.30831 | [M-H] <sup>-</sup>     | 0.328 |
| C28H46O3   | 1 | 429.33730 | 430.34470 | [M-H] <sup>-</sup>     | 0.293 |
| C29H50O2   | 2 | 429.37380 | 430.38108 | [M-H] <sup>-</sup>     | 0.026 |
| C23H39NO4  | 1 | 430.23600 | 393.28791 | [M-2H+K] <sup>-</sup>  | 1.183 |
| C21H35O7P  | 1 | 431.21750 | 430.21204 | [M+H] <sup>+</sup>     | 4.204 |
| C26H32O4   | 1 | 431.21750 | 408.23006 | [M+Na] <sup>+</sup>    | 4.132 |
| C19H37O7P  | 1 | 431.21750 | 408.22769 | [M+Na] <sup>+</sup>    | 1.359 |
| C24H42O4   | 1 | 431.25890 | 394.30831 | [M-2H+K] <sup>-</sup>  | 4.612 |
| C26H38O5   | 1 | 431.27900 | 430.27193 | [M+H] <sup>+</sup>     | 0.454 |
| C26H40O5   | 1 | 431.28010 | 432.28758 | [M-H] <sup>-</sup>     | 0.478 |
| C27H41FO3  | 1 | 431.29530 | 432.30397 | [M-H] <sup>-</sup>     | 3.255 |
| C27H44O4   | 1 | 431.31660 | 432.32396 | [M-H] <sup>-</sup>     | 0.211 |



|            |   |           |           |            |       |
|------------|---|-----------|-----------|------------|-------|
| C28H48O3   | 1 | 431.35290 | 432.36035 | [M-H]-     | 0.408 |
| C27H52O2   | 1 | 431.38480 | 408.39673 | [M+Na]+    | 2.670 |
| C29H52O2   | 1 | 431.38930 | 432.39673 | [M-H]-     | 0.373 |
| C22H39N3O3 | 1 | 432.26390 | 393.29914 | [M+K]+     | 3.720 |
| C24H45NO3  | 1 | 432.28820 | 395.33994 | [M-2H+K]-  | 0.796 |
| C18H35O7P  | 2 | 433.17470 | 394.21204 | [M+K]+     | 1.138 |
| C22H36O6   | 1 | 433.20170 | 396.25119 | [M-2H+K]-  | 4.407 |
| C24H31FO6  | 1 | 433.20170 | 434.21047 | [M-H]-     | 3.460 |
| C21H37O7P  | 2 | 433.23280 | 432.22769 | [M+H]+     | 4.993 |
| C19H39O7P  | 4 | 433.23280 | 410.24334 | [M+Na]+    | 0.545 |
| C23H38O5   | 1 | 433.23470 | 394.27193 | [M+K]+     | 0.868 |
| C27H38O2   | 1 | 433.25190 | 394.28718 | [M+K]+     | 3.621 |
| C27H38O3   | 1 | 433.27080 | 410.28210 | [M+Na]+    | 1.193 |
| C26H42O5   | 1 | 433.29610 | 434.30323 | [M-H]-     | 0.332 |
| C28H42O2   | 1 | 433.30850 | 410.31848 | [M+Na]+    | 1.842 |
| C27H43FO3  | 1 | 433.31120 | 434.31962 | [M-H]-     | 2.663 |
| C27H44O4   | 1 | 433.33000 | 432.32396 | [M+H]+     | 2.841 |
| C27H46O4   | 1 | 433.33230 | 434.33961 | [M-H]-     | 0.095 |
| C28H50O3   | 1 | 433.36880 | 434.37600 | [M-H]-     | 0.171 |
| C29H54O2   | 1 | 433.40530 | 434.41238 | [M-H]-     | 0.436 |
| C28H58O    | 1 | 433.43920 | 410.44877 | [M+Na]+    | 2.799 |
| C22H37NO5  | 1 | 434.23090 | 395.26717 | [M+K]+     | 1.326 |
| C26H39NO3  | 1 | 434.26760 | 413.29299 | [M-2H+Na]- | 0.124 |
| C27H43NO   | 1 | 434.28260 | 397.33446 | [M-2H+K]-  | 1.068 |
| C27H43NO2  | 1 | 434.30340 | 413.32938 | [M-2H+Na]- | 1.471 |
| C26H43NO4  | 1 | 434.32590 | 433.31921 | [M+H]+     | 1.333 |
| C25H51NO2  | 1 | 434.34020 | 397.39198 | [M-2H+K]-  | 0.875 |
| C28H47NO   | 1 | 434.34020 | 413.36570 | [M-2H+Na]- | 0.368 |
| C21H29ClO5 | 1 | 435.13510 | 396.17035 | [M+K]+     | 3.668 |
| C21H32O6S  | 1 | 435.17940 | 412.19196 | [M+Na]+    | 4.099 |
| C18H37O7P  | 1 | 435.18870 | 396.22769 | [M+K]+     | 4.924 |
| C25H40O6   | 1 | 435.27500 | 436.28249 | [M-H]-     | 0.508 |
| C26H43O3P  | 1 | 435.30330 | 434.29498 | [M+H]+     | 2.405 |
| C28H44O    | 1 | 435.30330 | 396.33922 | [M+K]+     | 2.146 |
| C23H44N2O4 | 1 | 435.31870 | 412.33011 | [M+Na]+    | 1.445 |
| C25H50O3   | 1 | 435.32670 | 398.37600 | [M-2H+K]-  | 4.833 |
| C27H48O4   | 1 | 435.34780 | 436.35526 | [M-H]-     | 0.439 |
| C29H48O    | 1 | 435.35840 | 412.37052 | [M+Na]+    | 3.071 |
| C28H52O3   | 1 | 435.38440 | 436.39165 | [M-H]-     | 0.055 |
| C29H56O2   | 1 | 435.42070 | 436.42803 | [M-H]-     | 0.140 |
| C22H39NO5  | 1 | 436.24680 | 397.28282 | [M+K]+     | 1.893 |
| C23H43NO3S | 1 | 436.28370 | 413.29637 | [M+Na]+    | 4.327 |
| C26H39NO3  | 4 | 436.28370 | 413.29299 | [M+Na]+    | 3.404 |
| C27H45NO   | 1 | 436.29830 | 399.35011 | [M-2H+K]-  | 0.949 |
| C27H45NO2  | 1 | 436.31960 | 415.34503 | [M-2H+Na]- | 0.204 |
| C24H32O6   | 2 | 437.19670 | 416.21989 | [M-2H+Na]- | 4.915 |
| C25H42O6   | 1 | 437.29120 | 438.29814 | [M-H]-     | 0.752 |
| C29H42O3   | 1 | 437.30620 | 438.31340 | [M-H]-     | 0.169 |
| C27H42F2O2 | 1 | 437.32290 | 436.31529 | [M+H]+     | 0.782 |
| C26H46O5   | 1 | 437.32740 | 438.33453 | [M-H]-     | 0.329 |
| C25H50O3   | 1 | 437.33880 | 398.37600 | [M+K]+     | 0.791 |
| C28H46O2   | 1 | 437.33880 | 414.34978 | [M+Na]+    | 0.462 |
| C27H48O4   | 1 | 437.36340 | 436.35526 | [M+H]+     | 1.987 |

|            |   |           |           |            |       |
|------------|---|-----------|-----------|------------|-------|
| C29H58O2   | 1 | 437.43640 | 438.44368 | [M-H]-     | 0.025 |
| C31H64     | 1 | 437.50590 | 436.50080 | [M+H]+     | 4.962 |
| C27H47NO   | 1 | 438.31390 | 401.36576 | [M-2H+K]-  | 1.059 |
| C23H31ClO6 | 1 | 439.18670 | 438.18092 | [M+H]+     | 3.390 |
| C24H32O5   | 1 | 439.18670 | 400.22498 | [M+K]+     | 3.247 |
| C25H36O4   | 1 | 439.22550 | 400.26136 | [M+K]+     | 2.252 |
| C30H40     | 1 | 439.27710 | 400.31300 | [M+K]+     | 2.160 |
| C27H44O2   | 1 | 439.29830 | 400.33413 | [M+K]+     | 2.320 |
| C29H44O3   | 1 | 439.32160 | 440.32905 | [M-H]-     | 0.401 |
| C30H48O2   | 2 | 439.35800 | 440.36543 | [M-H]-     | 0.366 |
| C25H41NO3  | 1 | 440.25690 | 403.30864 | [M-2H+K]-  | 0.781 |
| C26H39N3O3 | 1 | 440.29330 | 441.29914 | [M-H]-     | 3.243 |
| C26H45NO2  | 1 | 440.29330 | 403.34503 | [M-2H+K]-  | 0.747 |
| C28H41NO3  | 1 | 440.31590 | 439.30864 | [M+H]+     | 0.032 |
| C27H46FNO  | 1 | 440.32960 | 419.35634 | [M-2H+Na]- | 3.186 |
| C27H47NO2  | 1 | 440.34850 | 417.36068 | [M+Na]+    | 3.182 |
| C23H33ClO6 | 1 | 441.20170 | 440.19657 | [M+H]+     | 4.848 |
| C24H34O5   | 1 | 441.20170 | 402.24063 | [M+K]+     | 4.705 |
| C26H34O6   | 1 | 441.22830 | 442.23554 | [M-H]-     | 0.066 |
| C21H39O6P  | 2 | 441.23790 | 418.24843 | [M+Na]+    | 0.569 |
| C26H42O2S  | 1 | 441.28150 | 418.29055 | [M+Na]+    | 3.911 |
| C27H43FO   | 1 | 441.29150 | 402.32979 | [M+K]+     | 3.272 |
| C30H42     | 1 | 441.29150 | 402.32865 | [M+K]+     | 0.682 |
| C26H39F3O2 | 5 | 441.29810 | 440.29022 | [M+H]+     | 1.391 |
| C26H42O4   | 6 | 441.29810 | 418.30831 | [M+Na]+    | 1.287 |
| C28H42O4   | 1 | 441.30090 | 442.30831 | [M-H]-     | 0.320 |
| C27H46O3   | 1 | 441.33590 | 418.34470 | [M+Na]+    | 4.493 |
| C29H44O3   | 1 | 441.33590 | 440.32905 | [M+H]+     | 0.943 |
| C29H46O3   | 1 | 441.33740 | 442.34470 | [M-H]-     | 0.059 |
| C30H50O2   | 3 | 441.37370 | 442.38108 | [M-H]-     | 0.251 |
| C18H36NO9P | 1 | 442.22070 | 441.21277 | [M+H]+     | 1.488 |
| C20H40NO6P | 1 | 442.23610 | 421.25933 | [M-2H+Na]- | 4.778 |
| C24H39NO4  | 1 | 442.23610 | 405.28791 | [M-2H+K]-  | 0.925 |
| C25H41NO4  | 1 | 442.29490 | 419.30356 | [M+Na]+    | 4.793 |
| C24H41N3O3 | 1 | 442.30320 | 419.31479 | [M+Na]+    | 1.838 |
| C24H43N3O3 | 1 | 442.30430 | 421.33044 | [M-2H+Na]- | 1.813 |
| C18H28O11  | 1 | 443.15250 | 420.16317 | [M+Na]+    | 0.255 |
| C23H32O6   | 1 | 443.18410 | 404.21989 | [M+K]+     | 2.390 |
| C18H35O10P | 2 | 443.20510 | 442.19679 | [M+H]+     | 2.351 |
| C25H32O7   | 1 | 443.20760 | 444.21481 | [M-H]-     | 0.144 |
| C19H39O9P  | 2 | 443.24170 | 442.23317 | [M+H]+     | 2.836 |
| C26H34O6   | 2 | 443.24470 | 442.23554 | [M+H]+     | 4.262 |
| C27H40O5   | 1 | 443.28020 | 444.28758 | [M-H]-     | 0.239 |
| C26H44O3   | 1 | 443.29180 | 404.32905 | [M+K]+     | 0.893 |
| C29H40O2   | 1 | 443.29180 | 420.30283 | [M+Na]+    | 0.568 |
| C28H44O4   | 1 | 443.31660 | 444.32396 | [M-H]-     | 0.205 |
| C27H48O3   | 1 | 443.34900 | 420.36035 | [M+Na]+    | 1.279 |
| C29H48O3   | 1 | 443.35290 | 444.36035 | [M-H]-     | 0.397 |
| C28H52O2   | 1 | 443.38740 | 420.39673 | [M+Na]+    | 3.266 |
| C30H50O2   | 1 | 443.38740 | 442.38108 | [M+H]+     | 2.145 |
| C28H54O2   | 2 | 443.38920 | 422.41238 | [M-2H+Na]- | 4.869 |
| C30H52O2   | 3 | 443.38920 | 444.39673 | [M-H]-     | 0.589 |
| C30H60     | 1 | 443.45770 | 420.46950 | [M+Na]+    | 2.305 |

|            |   |           |           |            |       |
|------------|---|-----------|-----------|------------|-------|
| C28H41NO2  | 1 | 444.28800 | 423.31373 | [M-2H+Na]- | 0.876 |
| C22H30O7   | 1 | 445.16020 | 406.19916 | [M+K]+     | 4.731 |
| C24H38O5   | 1 | 445.23320 | 406.27193 | [M+K]+     | 4.214 |
| C20H39O7P  | 1 | 445.23320 | 422.24334 | [M+Na]+    | 1.428 |
| C22H39O7P  | 1 | 445.23800 | 446.24334 | [M-H]-     | 4.328 |
| C24H40O5   | 1 | 445.23800 | 408.28758 | [M-2H+K]-  | 4.097 |
| C23H38N2O4 | 1 | 445.24830 | 406.28316 | [M+K]+     | 4.474 |
| C28H40O3   | 1 | 445.27450 | 424.29775 | [M-2H+Na]- | 4.703 |
| C25H41FO4  | 1 | 445.27450 | 424.29889 | [M-2H+Na]- | 2.136 |
| C27H42O5   | 1 | 445.29590 | 446.30323 | [M-H]-     | 0.126 |
| C28H43FO3  | 1 | 445.31140 | 446.31962 | [M-H]-     | 2.142 |
| C28H46O4   | 1 | 445.33210 | 446.33961 | [M-H]-     | 0.541 |
| C29H48O3   | 1 | 445.36660 | 444.36035 | [M+H]+     | 2.281 |
| C29H50O3   | 1 | 445.36850 | 446.37600 | [M-H]-     | 0.507 |
| C28H54O2   | 2 | 445.40290 | 422.41238 | [M+Na]+    | 2.914 |
| C30H52O2   | 2 | 445.40290 | 444.39673 | [M+H]+     | 2.472 |
| C28H56O2   | 1 | 445.40490 | 424.42803 | [M-2H+Na]- | 4.960 |
| C30H54O2   | 1 | 445.40490 | 446.41238 | [M-H]-     | 0.474 |
| C19H38NO7P | 1 | 446.22800 | 423.23859 | [M+Na]+    | 0.419 |
| C20H44NO6P | 1 | 446.26750 | 425.29063 | [M-2H+Na]- | 4.959 |
| C27H43NO4  | 1 | 446.32710 | 445.31921 | [M+H]+     | 1.391 |
| C26H51NO2  | 1 | 446.34020 | 409.39198 | [M-2H+K]-  | 0.851 |
| C23H38O6   | 1 | 447.21760 | 410.26684 | [M-2H+K]-  | 4.828 |
| C27H44O5   | 1 | 447.31160 | 448.31888 | [M-H]-     | 0.013 |
| C29H46O2   | 1 | 447.32660 | 426.34978 | [M-2H+Na]- | 4.826 |
| C26H50O3   | 1 | 447.32660 | 410.37600 | [M-2H+K]-  | 4.480 |
| C28H45FO3  | 1 | 447.32660 | 448.33527 | [M-H]-     | 3.139 |
| C30H48     | 1 | 447.33880 | 408.37560 | [M+K]+     | 0.110 |
| C28H48O4   | 1 | 447.34800 | 448.35526 | [M-H]-     | 0.020 |
| C30H56O2   | 2 | 447.42070 | 448.42803 | [M-H]-     | 0.136 |
| C18H19O9S  | 1 | 448.02470 | 411.07490 | [M-2H+K]-  | 2.678 |
| C19H21O9S  | 1 | 448.08080 | 425.09060 | [M+Na]+    | 2.185 |
| C26H53NO2  | 1 | 448.35560 | 411.40763 | [M-2H+K]-  | 1.405 |
| C21H30O9   | 1 | 449.17660 | 426.18899 | [M+Na]+    | 3.578 |
| C19H39O7P  | 1 | 449.20860 | 410.24334 | [M+K]+     | 4.690 |
| C23H38O7   | 1 | 449.24880 | 426.26176 | [M+Na]+    | 4.846 |
| C27H46O5   | 1 | 449.32730 | 450.33453 | [M-H]-     | 0.098 |
| C31H46O2   | 1 | 449.34250 | 450.34978 | [M-H]-     | 0.024 |
| C23H46N4O3 | 1 | 449.34400 | 426.35699 | [M+Na]+    | 4.923 |
| C28H45FO3  | 1 | 449.34400 | 448.33527 | [M+H]+     | 3.240 |
| C28H48O4   | 1 | 449.36050 | 448.35526 | [M+H]+     | 4.520 |
| C26H50O4   | 1 | 449.36050 | 426.37091 | [M+Na]+    | 0.819 |
| C28H50O4   | 1 | 449.36370 | 450.37091 | [M-H]-     | 0.131 |
| C30H56O2   | 1 | 449.43400 | 448.42803 | [M+H]+     | 2.895 |
| C30H58O2   | 2 | 449.43620 | 450.44368 | [M-H]-     | 0.469 |
| C18H21O9S  | 1 | 450.04010 | 413.09060 | [M-2H+K]-  | 2.000 |
| C26H39NO3  | 1 | 450.24120 | 413.29299 | [M-2H+K]-  | 0.875 |
| C23H43NO5  | 1 | 450.26220 | 413.31412 | [M-2H+K]-  | 1.164 |
| C21H42NO7P | 1 | 450.26220 | 451.26989 | [M-H]-     | 0.937 |
| C27H43NO2  | 1 | 450.27780 | 413.32938 | [M-2H+K]-  | 0.398 |
| C28H47NO   | 1 | 450.31380 | 413.36570 | [M-2H+K]-  | 1.110 |
| C26H53NO2  | 1 | 450.36950 | 411.40763 | [M+K]+     | 2.842 |
| C23H30O9   | 1 | 451.19510 | 450.18899 | [M+H]+     | 2.562 |

|             |   |           |           |            |       |
|-------------|---|-----------|-----------|------------|-------|
| C27H4003    | 1 | 451.25960 | 412.29775 | [M+K]+     | 2.872 |
| C29H4004    | 1 | 451.28540 | 452.29266 | [M-H]-     | 0.020 |
| C30H4403    | 1 | 451.32170 | 452.32905 | [M-H]-     | 0.168 |
| C22H47N2O5P | 1 | 451.33070 | 450.32226 | [M+H]+     | 2.590 |
| C27H4805    | 1 | 451.34280 | 452.35018 | [M-H]-     | 0.235 |
| C31H4802    | 1 | 451.35800 | 452.36543 | [M-H]-     | 0.357 |
| C30H6002    | 1 | 451.45180 | 452.45933 | [M-H]-     | 0.578 |
| C30H5802    | 1 | 451.45200 | 450.44368 | [M+H]+     | 2.324 |
| C31H620     | 1 | 451.48510 | 450.48007 | [M+H]+     | 4.953 |
| C21H42NO7P  | 1 | 452.27740 | 451.26989 | [M+H]+     | 0.526 |
| C23H43NO5   | 1 | 452.27740 | 413.31412 | [M+K]+     | 0.279 |
| C21H44NO7P  | 1 | 452.27810 | 453.28554 | [M-H]-     | 0.380 |
| C27H45NO2   | 1 | 452.29310 | 415.34503 | [M-2H+K]-  | 1.170 |
| C22H48NO6P  | 1 | 452.31440 | 453.32193 | [M-H]-     | 0.568 |
| C27H45NO3   | 1 | 452.31440 | 431.33994 | [M-2H+Na]- | 0.451 |
| C27H43NO3   | 1 | 452.31470 | 429.32429 | [M+Na]+    | 2.620 |
| C22H46NO6P  | 1 | 452.31470 | 451.30628 | [M+H]+     | 2.549 |
| C21H34O8    | 1 | 453.18880 | 414.22537 | [M+K]+     | 0.616 |
| C21H34O7S   | 1 | 453.19320 | 430.20253 | [M+Na]+    | 3.202 |
| C26H38O5    | 1 | 453.26270 | 430.27193 | [M+Na]+    | 3.426 |
| C28H38O5    | 1 | 453.26470 | 454.27193 | [M-H]-     | 0.097 |
| C27H42O3    | 1 | 453.27730 | 414.31340 | [M+K]+     | 1.663 |
| C27H42O4    | 1 | 453.29970 | 430.30831 | [M+Na]+    | 4.783 |
| C22H45O7P   | 1 | 453.29970 | 452.29029 | [M+H]+     | 4.714 |
| C29H4004    | 1 | 453.29970 | 452.29266 | [M+H]+     | 0.510 |
| C29H42O4    | 2 | 453.30110 | 454.30831 | [M-H]-     | 0.130 |
| C26H46O6    | 1 | 453.32220 | 454.32944 | [M-H]-     | 0.064 |
| C30H4403    | 1 | 453.33410 | 452.32905 | [M+H]+     | 4.888 |
| C28H46O3    | 1 | 453.33410 | 430.34470 | [M+Na]+    | 0.404 |
| C23H49O6P   | 1 | 453.33410 | 452.32668 | [M+H]+     | 0.335 |
| C30H46O3    | 2 | 453.33730 | 454.34470 | [M-H]-     | 0.278 |
| C27H4805    | 2 | 453.35750 | 452.35018 | [M+H]+     | 0.119 |
| C31H5002    | 1 | 453.37370 | 454.38108 | [M-H]-     | 0.245 |
| C30H6002    | 1 | 453.46500 | 452.45933 | [M+H]+     | 3.531 |
| C20H40NO8P  | 1 | 454.25810 | 453.24916 | [M+H]+     | 3.683 |
| C26H43NO3   | 2 | 454.27240 | 417.32429 | [M-2H+K]-  | 1.087 |
| C22H41NO7   | 1 | 454.27810 | 431.28830 | [M+Na]+    | 1.266 |
| C21H41N3O6  | 1 | 454.28970 | 431.29954 | [M+Na]+    | 2.074 |
| C21H44NO7P  | 2 | 454.29280 | 453.28554 | [M+H]+     | 0.026 |
| C27H47NO2   | 1 | 454.30870 | 417.36068 | [M-2H+K]-  | 1.277 |
| C28H48FNO   | 1 | 454.34500 | 433.37199 | [M-2H+Na]- | 3.638 |
| C20H39O9P   | 1 | 455.24130 | 454.23317 | [M+H]+     | 1.883 |
| C26H4004    | 1 | 455.25730 | 416.29266 | [M+K]+     | 3.271 |
| C26H4005    | 1 | 455.27660 | 432.28758 | [M+Na]+    | 0.433 |
| C28H4005    | 1 | 455.28020 | 456.28758 | [M-H]-     | 0.233 |
| C29H42O4    | 1 | 455.31660 | 454.30831 | [M+H]+     | 2.238 |
| C29H44O4    | 1 | 455.31660 | 456.32396 | [M-H]-     | 0.200 |
| C28H48O2    | 1 | 455.32920 | 416.36543 | [M+K]+     | 1.359 |
| C30H48O3    | 2 | 455.35300 | 456.36035 | [M-H]-     | 0.167 |
| C31H52O2    | 1 | 455.38950 | 456.39673 | [M-H]-     | 0.086 |
| C32H54O     | 1 | 455.42550 | 454.41747 | [M+H]+     | 1.678 |
| C23H37NO6S  | 1 | 456.24120 | 455.23416 | [M+H]+     | 0.509 |
| C25H41NO4   | 1 | 456.25190 | 419.30356 | [M-2H+K]-  | 0.568 |

|             |   |           |           |                        |       |
|-------------|---|-----------|-----------|------------------------|-------|
| C20H41O9P   | 1 | 457.25610 | 456.24882 | [M+H] <sup>+</sup>     | 0.015 |
| C27H46O3    | 1 | 457.30620 | 418.34470 | [M+K] <sup>+</sup>     | 3.599 |
| C27H40N2O4  | 1 | 457.30620 | 456.29881 | [M+H] <sup>+</sup>     | 0.267 |
| C27H43FO3   | 1 | 457.30980 | 434.31962 | [M+Na] <sup>+</sup>    | 2.088 |
| C27H48O4    | 1 | 457.33210 | 436.35526 | [M-2H+Na] <sup>-</sup> | 4.765 |
| C29H46O4    | 1 | 457.33210 | 458.33961 | [M-H] <sup>-</sup>     | 0.527 |
| C29H44O4    | 1 | 457.33240 | 456.32396 | [M+H] <sup>+</sup>     | 2.556 |
| C28H50O3    | 1 | 457.36300 | 434.37600 | [M+Na] <sup>+</sup>    | 4.847 |
| C28H52O3    | 1 | 457.36850 | 436.39165 | [M-2H+Na] <sup>-</sup> | 4.797 |
| C30H50O3    | 2 | 457.36850 | 458.37600 | [M-H] <sup>-</sup>     | 0.494 |
| C29H56O2    | 1 | 457.40480 | 436.42803 | [M-2H+Na] <sup>-</sup> | 4.611 |
| C27H39NO5   | 1 | 458.29220 | 457.28282 | [M+H] <sup>+</sup>     | 4.595 |
| C29H43NO2   | 1 | 458.30370 | 437.32938 | [M-2H+Na] <sup>-</sup> | 0.740 |
| C30H51NO2   | 1 | 458.39910 | 457.39198 | [M+H] <sup>+</sup>     | 0.327 |
| C25H40O6    | 2 | 459.27160 | 436.28249 | [M+Na] <sup>+</sup>    | 0.244 |
| C27H40O6    | 1 | 459.27540 | 460.28249 | [M-H] <sup>-</sup>     | 0.390 |
| C29H42O3    | 1 | 459.29020 | 438.31340 | [M-2H+Na] <sup>-</sup> | 4.668 |
| C28H44O5    | 1 | 459.31180 | 460.31888 | [M-H] <sup>-</sup>     | 0.422 |
| C29H48O4    | 1 | 459.34800 | 460.35526 | [M-H] <sup>-</sup>     | 0.020 |
| C28H52O3    | 1 | 459.37860 | 436.39165 | [M+Na] <sup>+</sup>    | 4.935 |
| C30H52O3    | 1 | 459.38430 | 460.39165 | [M-H] <sup>-</sup>     | 0.165 |
| C20H40NO6P  | 1 | 460.22070 | 421.25933 | [M+K] <sup>+</sup>     | 3.861 |
| C21H44NO6P  | 1 | 460.28040 | 437.29063 | [M+Na] <sup>+</sup>    | 1.199 |
| C21H46NO6P  | 1 | 460.28300 | 439.30628 | [M-2H+Na] <sup>-</sup> | 4.482 |
| C28H41NO3   | 1 | 460.28300 | 439.30864 | [M-2H+Na] <sup>-</sup> | 0.660 |
| C25H34O8    | 1 | 461.21830 | 462.22537 | [M-H] <sup>-</sup>     | 0.431 |
| C21H43O6P   | 1 | 461.24370 | 422.27973 | [M+K] <sup>+</sup>     | 1.782 |
| C24H38O7    | 2 | 461.24870 | 438.26176 | [M+Na] <sup>+</sup>    | 4.937 |
| C21H43O7P   | 1 | 461.26370 | 438.27464 | [M+Na] <sup>+</sup>    | 0.356 |
| C23H43O7P   | 1 | 461.26950 | 462.27464 | [M-H] <sup>-</sup>     | 4.611 |
| C27H42O6    | 1 | 461.29100 | 462.29814 | [M-H] <sup>-</sup>     | 0.280 |
| C29H42O3    | 1 | 461.30140 | 438.31340 | [M+Na] <sup>+</sup>    | 2.638 |
| C29H44O3    | 1 | 461.30600 | 440.32905 | [M-2H+Na] <sup>-</sup> | 4.973 |
| C30H46O     | 1 | 461.32020 | 422.35487 | [M+K] <sup>+</sup>     | 4.734 |
| C28H46O5    | 1 | 461.32720 | 462.33453 | [M-H] <sup>-</sup>     | 0.121 |
| C30H48O2    | 2 | 461.34200 | 440.36543 | [M-2H+Na] <sup>-</sup> | 4.138 |
| C29H50O4    | 1 | 461.36330 | 462.37091 | [M-H] <sup>-</sup>     | 0.739 |
| C28H56O3    | 1 | 461.39980 | 440.42295 | [M-2H+Na] <sup>-</sup> | 4.755 |
| C29H58O     | 1 | 461.41040 | 422.44877 | [M+K] <sup>+</sup>     | 3.286 |
| C30H62      | 1 | 461.44660 | 422.48515 | [M+K] <sup>+</sup>     | 3.686 |
| C23H37NO5S  | 1 | 462.22920 | 439.23925 | [M+Na] <sup>+</sup>    | 1.584 |
| C28H41NO2   | 1 | 462.27550 | 423.31373 | [M+K] <sup>+</sup>     | 2.983 |
| C21H46NO6P  | 1 | 462.29700 | 439.30628 | [M+Na] <sup>+</sup>    | 3.249 |
| C28H41NO3   | 3 | 462.29700 | 439.30864 | [M+Na] <sup>+</sup>    | 1.871 |
| C15H29O10P3 | 1 | 463.10520 | 462.09736 | [M+H] <sup>+</sup>     | 1.224 |
| C22H32O8    | 1 | 463.17230 | 424.20972 | [M+K] <sup>+</sup>     | 1.233 |
| C20H41O7P   | 1 | 463.22010 | 424.25899 | [M+K] <sup>+</sup>     | 4.410 |
| C29H36O5    | 1 | 463.24920 | 464.25628 | [M-H] <sup>-</sup>     | 0.419 |
| C27H42O6    | 3 | 463.30330 | 462.29814 | [M+H] <sup>+</sup>     | 4.556 |
| C23H46N4O3  | 1 | 463.30650 | 426.35699 | [M-2H+K] <sup>-</sup>  | 1.962 |
| C27H44O6    | 1 | 463.30650 | 464.31379 | [M-H] <sup>-</sup>     | 0.045 |
| C26H50O4    | 1 | 463.32170 | 426.37091 | [M-2H+K] <sup>-</sup>  | 4.725 |
| C31H44O3    | 1 | 463.32170 | 464.32905 | [M-H] <sup>-</sup>     | 0.164 |

|            |   |           |           |            |       |
|------------|---|-----------|-----------|------------|-------|
| C28H48O5   | 1 | 463.34320 | 464.35018 | [M-H]-     | 0.635 |
| C30H50O2   | 3 | 463.35800 | 442.38108 | [M-2H+Na]- | 4.875 |
| C27H54O3   | 1 | 463.35800 | 426.40730 | [M-2H+K]-  | 4.541 |
| C28H56O3   | 1 | 463.41060 | 440.42295 | [M+Na]+    | 3.381 |
| C31H60O2   | 1 | 463.45200 | 464.45933 | [M-H]-     | 0.132 |
| C20H44NO6P | 1 | 464.25160 | 425.29063 | [M+K]+     | 4.689 |
| C22H44NO7P | 1 | 464.27820 | 465.28554 | [M-H]-     | 0.155 |
| C28H39N3O3 | 1 | 464.29290 | 465.29914 | [M-H]-     | 2.214 |
| C25H49NO4  | 1 | 464.31350 | 427.36616 | [M-2H+K]-  | 2.714 |
| C23H48NO6P | 1 | 464.31350 | 465.32193 | [M-H]-     | 2.492 |
| C18H35O10P | 1 | 465.18810 | 442.19679 | [M+Na]+    | 4.495 |
| C24H32O9   | 1 | 465.21140 | 464.20464 | [M+H]+     | 1.088 |
| C23H40O7   | 1 | 465.22810 | 428.27741 | [M-2H+K]-  | 4.501 |
| C29H38O5   | 1 | 465.26460 | 466.27193 | [M-H]-     | 0.120 |
| C28H41F3O2 | 1 | 465.30090 | 466.30587 | [M-H]-     | 4.952 |
| C28H44O4   | 1 | 465.30090 | 444.32396 | [M-2H+Na]- | 4.898 |
| C23H47O7P  | 1 | 465.30090 | 466.30594 | [M-H]-     | 4.786 |
| C27H46O6   | 1 | 465.32240 | 466.32944 | [M-H]-     | 0.492 |
| C31H44O3   | 1 | 465.33460 | 464.32905 | [M+H]+     | 3.688 |
| C29H46O3   | 1 | 465.33460 | 442.34470 | [M+Na]+    | 1.468 |
| C29H48O3   | 1 | 465.33720 | 444.36035 | [M-2H+Na]- | 4.715 |
| C31H46O3   | 2 | 465.33720 | 466.34470 | [M-H]-     | 0.486 |
| C29H46F2O2 | 1 | 465.35370 | 464.34659 | [M+H]+     | 0.340 |
| C28H50O5   | 1 | 465.35840 | 466.36583 | [M-H]-     | 0.335 |
| C31H62O2   | 1 | 465.46770 | 466.47498 | [M-H]-     | 0.024 |
| C27H43NO3  | 1 | 466.27220 | 429.32429 | [M-2H+K]-  | 1.488 |
| C25H32O7   | 2 | 467.20420 | 444.21481 | [M+Na]+    | 0.370 |
| C23H41O6P  | 1 | 467.25150 | 444.26408 | [M+Na]+    | 3.850 |
| C23H40O8   | 1 | 467.26130 | 444.27232 | [M+Na]+    | 0.518 |
| C27H39F3O3 | 1 | 467.28000 | 468.28513 | [M-H]-     | 4.578 |
| C27H42O5   | 1 | 467.28000 | 446.30323 | [M-2H+Na]- | 4.524 |
| C22H45O8P  | 1 | 467.28000 | 468.28521 | [M-H]-     | 4.413 |
| C23H47O7P  | 1 | 467.31170 | 466.30594 | [M+H]+     | 3.238 |
| C28H44O4   | 1 | 467.31170 | 444.32396 | [M+Na]+    | 3.171 |
| C28H41F3O2 | 1 | 467.31170 | 466.30587 | [M+H]+     | 3.073 |
| C28H46O4   | 1 | 467.31660 | 446.33961 | [M-2H+Na]- | 4.984 |
| C30H44O4   | 2 | 467.31660 | 468.32396 | [M-H]-     | 0.195 |
| C27H48O6   | 1 | 467.33740 | 468.34509 | [M-H]-     | 0.901 |
| C29H50O3   | 1 | 467.35290 | 446.37600 | [M-2H+Na]- | 4.802 |
| C31H48O3   | 2 | 467.35290 | 468.36035 | [M-H]-     | 0.377 |
| C28H50O5   | 4 | 467.37450 | 466.36583 | [M+H]+     | 3.004 |
| C32H52O2   | 2 | 467.38940 | 468.39673 | [M-H]-     | 0.131 |
| C27H45NO3  | 1 | 468.28800 | 431.33994 | [M-2H+K]-  | 1.162 |
| C23H50NO6P | 1 | 468.34610 | 467.33758 | [M+H]+     | 2.675 |
| C24H30O8   | 1 | 469.18330 | 446.19407 | [M+Na]+    | 0.017 |
| C25H34O7   | 1 | 469.22180 | 446.23046 | [M+Na]+    | 4.525 |
| C22H39O7P  | 1 | 469.23190 | 446.24334 | [M+Na]+    | 1.415 |
| C21H43O9P  | 1 | 469.25930 | 470.26447 | [M-H]-     | 4.469 |
| C27H41F3O3 | 1 | 469.29580 | 470.30078 | [M-H]-     | 4.878 |
| C27H44O5   | 1 | 469.29580 | 448.31888 | [M-2H+Na]- | 4.824 |
| C22H47O8P  | 1 | 469.29580 | 470.30086 | [M-H]-     | 4.713 |
| C29H42O5   | 1 | 469.29580 | 470.30323 | [M-H]-     | 0.332 |
| C28H46O4   | 1 | 469.32870 | 446.33961 | [M+Na]+    | 0.281 |

|            |   |           |           |            |       |
|------------|---|-----------|-----------|------------|-------|
| C28H48O4   | 1 | 469.33200 | 448.35526 | [M-2H+Na]- | 4.430 |
| C30H46O4   | 2 | 469.33200 | 470.33961 | [M-H]-     | 0.727 |
| C31H50O3   | 2 | 469.36850 | 470.37600 | [M-H]-     | 0.481 |
| C30H56O2   | 2 | 469.40480 | 448.42803 | [M-2H+Na]- | 4.493 |
| C32H54O2   | 2 | 469.40480 | 470.41238 | [M-H]-     | 0.663 |
| C30H60O3   | 1 | 469.46210 | 468.45425 | [M+H]+     | 1.244 |
| C20H40NO9P | 1 | 470.24980 | 469.24407 | [M+H]+     | 3.279 |
| C26H43NO4  | 1 | 470.26740 | 433.31921 | [M-2H+K]-  | 0.870 |
| C27H45NO4  | 2 | 470.32260 | 447.33486 | [M+Na]+    | 3.147 |
| C24H49NO4S | 1 | 470.32530 | 447.33823 | [M+Na]+    | 4.578 |
| C26H47BrO2 | 1 | 471.28100 | 470.27594 | [M+H]+     | 4.691 |
| C27H46O5   | 1 | 471.31140 | 450.33453 | [M-2H+Na]- | 4.698 |
| C28H50O4   | 1 | 471.34770 | 450.37091 | [M-2H+Na]- | 4.517 |
| C30H48O4   | 2 | 471.34770 | 472.35526 | [M-H]-     | 0.617 |
| C31H52O3   | 1 | 471.38400 | 472.39165 | [M-H]-     | 0.798 |
| C30H58O2   | 2 | 471.42060 | 450.44368 | [M-2H+Na]- | 4.792 |
| C32H56O2   | 1 | 471.42060 | 472.42803 | [M-H]-     | 0.342 |
| C25H39NO5  | 1 | 472.24440 | 433.28282 | [M+K]+     | 3.333 |
| C22H46NO6P | 1 | 472.28260 | 451.30628 | [M-2H+Na]- | 3.521 |
| C26H43NO5  | 1 | 472.30210 | 449.31412 | [M+Na]+    | 2.636 |
| C28H48FNO  | 1 | 472.33740 | 433.37199 | [M+K]+     | 4.778 |
| C27H42F2O3 | 3 | 473.28290 | 452.31020 | [M-2H+Na]- | 4.148 |
| C32H42O3   | 1 | 473.30630 | 474.31340 | [M-H]-     | 0.368 |
| C27H48O5   | 1 | 473.32720 | 452.35018 | [M-2H+Na]- | 4.994 |
| C29H46O5   | 1 | 473.32720 | 474.33453 | [M-H]-     | 0.118 |
| C30H50O4   | 1 | 473.36350 | 474.37091 | [M-H]-     | 0.298 |
| C30H60O2   | 1 | 473.43630 | 452.45933 | [M-2H+Na]- | 4.877 |
| C21H42NO7P | 3 | 474.25870 | 451.26989 | [M+Na]+    | 0.871 |
| C21H44NO7P | 1 | 474.26020 | 453.28554 | [M-2H+Na]- | 0.004 |
| C23H40NO7P | 4 | 474.26180 | 473.25424 | [M+H]+     | 0.607 |
| C22H48NO6P | 1 | 474.29850 | 453.32193 | [M-2H+Na]- | 4.033 |
| C24H42O7S  | 1 | 475.27010 | 474.26513 | [M+H]+     | 4.835 |
| C22H45O7P  | 1 | 475.27870 | 452.29029 | [M+Na]+    | 1.713 |
| C29H42O4   | 2 | 475.28510 | 454.30831 | [M-2H+Na]- | 4.479 |
| C26H46O5   | 1 | 475.28510 | 438.33453 | [M-2H+K]-  | 4.153 |
| C26H46O6   | 1 | 475.30560 | 454.32944 | [M-2H+Na]- | 3.154 |
| C28H44O6   | 1 | 475.30560 | 476.31379 | [M-H]-     | 1.938 |
| C32H42O3   | 1 | 475.32030 | 474.31340 | [M+H]+     | 0.770 |
| C30H46O3   | 2 | 475.32090 | 454.34470 | [M-2H+Na]- | 3.248 |
| C32H44O3   | 1 | 475.32090 | 476.32905 | [M-H]-     | 1.843 |
| C29H48O5   | 1 | 475.34260 | 476.35018 | [M-H]-     | 0.644 |
| C31H50O2   | 1 | 475.35740 | 454.38108 | [M-2H+Na]- | 3.490 |
| C30H62O2   | 1 | 475.45160 | 454.47498 | [M-2H+Na]- | 4.120 |
| C20H23O9S  | 6 | 476.05270 | 439.10630 | [M-2H+K]-  | 4.621 |
| C20H40NO7P | 1 | 476.21650 | 437.25424 | [M+K]+     | 1.873 |
| C23H42NO7P | 4 | 476.27490 | 475.26989 | [M+H]+     | 4.749 |
| C21H44NO7P | 2 | 476.27490 | 453.28554 | [M+Na]+    | 0.288 |
| C24H48NO6P | 1 | 476.31370 | 477.32193 | [M-H]-     | 2.009 |
| C29H45NO3  | 1 | 476.31370 | 455.33994 | [M-2H+Na]- | 1.898 |
| C25H42O6   | 1 | 477.26010 | 438.29814 | [M+K]+     | 2.495 |
| C28H38O5   | 1 | 477.26010 | 454.27193 | [M+Na]+    | 2.194 |
| C28H40O5   | 1 | 477.26440 | 456.28758 | [M-2H+Na]- | 4.534 |
| C29H44O4   | 1 | 477.30080 | 456.32396 | [M-2H+Na]- | 4.565 |

|            |   |           |           |            |       |
|------------|---|-----------|-----------|------------|-------|
| C30H46O3   | 1 | 477.33380 | 454.34470 | [M+Na]+    | 0.245 |
| C30H48O3   | 2 | 477.33700 | 456.36035 | [M-2H+Na]- | 4.177 |
| C29H50O5   | 1 | 477.35820 | 478.36583 | [M-H]-     | 0.746 |
| C31H52O2   | 1 | 477.37350 | 456.39673 | [M-2H+Na]- | 4.418 |
| C28H56O3   | 1 | 477.37350 | 440.42295 | [M-2H+K]-  | 4.093 |
| C32H62O2   | 1 | 477.46730 | 478.47498 | [M-H]-     | 0.861 |
| C20H42NO7P | 1 | 478.23150 | 439.26989 | [M+K]+     | 3.224 |
| C21H46NO6P | 1 | 478.26770 | 439.30628 | [M+K]+     | 3.611 |
| C23H46NO7P | 1 | 478.29370 | 479.30119 | [M-H]-     | 0.464 |
| C24H48NO6P | 1 | 478.32880 | 477.32193 | [M+H]+     | 0.830 |
| C29H45NO3  | 1 | 478.32880 | 455.33994 | [M+Na]+    | 0.763 |
| C30H51NO2  | 1 | 478.36540 | 457.39198 | [M-2H+Na]- | 2.592 |
| C23H33ClO6 | 1 | 479.15950 | 440.19657 | [M+K]+     | 0.457 |
| C20H42O7P2 | 1 | 479.23050 | 456.24058 | [M+Na]+    | 1.457 |
| C23H45O8P  | 1 | 479.28020 | 480.28521 | [M-H]-     | 4.720 |
| C29H46O4   | 1 | 479.31650 | 458.33961 | [M-2H+Na]- | 4.650 |
| C24H49O7P  | 1 | 479.31650 | 480.32159 | [M-H]-     | 4.542 |
| C31H44O4   | 1 | 479.31650 | 480.32396 | [M-H]-     | 0.398 |
| C28H48O6   | 1 | 479.33740 | 480.34509 | [M-H]-     | 0.878 |
| C30H48O3   | 1 | 479.34730 | 456.36035 | [M+Na]+    | 4.729 |
| C30H50O3   | 2 | 479.35290 | 458.37600 | [M-2H+Na]- | 4.681 |
| C32H48O3   | 1 | 479.35290 | 480.36035 | [M-H]-     | 0.367 |
| C29H50O5   | 1 | 479.37100 | 478.36583 | [M+H]+     | 4.372 |
| C28H56O3   | 1 | 479.38410 | 440.42295 | [M+K]+     | 4.164 |
| C31H52O2   | 1 | 479.38410 | 456.39673 | [M+Na]+    | 3.863 |
| C20H25O9S  | 1 | 480.08580 | 441.12190 | [M+K]+     | 1.562 |
| C23H46NO7P | 3 | 480.30740 | 479.30119 | [M+H]+     | 2.211 |
| C29H36O6   | 1 | 481.25930 | 480.25119 | [M+H]+     | 1.743 |
| C27H42N2O3 | 1 | 481.28490 | 442.31954 | [M+K]+     | 4.586 |
| C28H44O5   | 1 | 481.29590 | 460.31888 | [M-2H+Na]- | 4.912 |
| C27H44O5S  | 1 | 481.30050 | 480.29095 | [M+H]+     | 4.741 |
| C29H46O3   | 1 | 481.30910 | 442.34470 | [M+K]+     | 2.605 |
| C29H48O4   | 1 | 481.33220 | 460.35526 | [M-2H+Na]- | 4.735 |
| C29H46F2O3 | 2 | 481.34750 | 480.34150 | [M+H]+     | 2.645 |
| C30H50O3   | 1 | 481.36450 | 458.37600 | [M+Na]+    | 1.490 |
| C30H52O3   | 1 | 481.36850 | 460.39165 | [M-2H+Na]- | 4.558 |
| C32H50O3   | 1 | 481.36850 | 482.37600 | [M-H]-     | 0.469 |
| C31H54O    | 1 | 481.38110 | 442.41747 | [M+K]+     | 1.005 |
| C30H58O4   | 1 | 481.42600 | 482.43351 | [M-H]-     | 0.501 |
| C32H64O2   | 1 | 481.49940 | 480.49063 | [M+H]+     | 3.113 |
| C22H44NO8P | 1 | 482.28730 | 481.28046 | [M+H]+     | 0.885 |
| C23H41O6P  | 1 | 483.22900 | 444.26408 | [M+K]+     | 3.667 |
| C27H42O6   | 1 | 483.27340 | 462.29814 | [M-2H+Na]- | 1.239 |
| C22H45O9P  | 1 | 483.27340 | 484.28012 | [M-H]-     | 1.132 |
| C28H46O5   | 1 | 483.31130 | 462.33453 | [M-2H+Na]- | 4.374 |
| C30H44O5   | 1 | 483.31130 | 484.31888 | [M-H]-     | 0.633 |
| C29H48O4   | 1 | 483.34570 | 460.35526 | [M+Na]+    | 2.520 |
| C29H50O4   | 1 | 483.34770 | 462.37091 | [M-2H+Na]- | 4.405 |
| C31H48O4   | 1 | 483.34770 | 484.35526 | [M-H]-     | 0.602 |
| C21H42NO9P | 1 | 484.26550 | 483.25972 | [M+H]+     | 3.081 |
| C27H43NO4  | 1 | 484.28060 | 445.31921 | [M+K]+     | 3.632 |
| C27H45NO4  | 1 | 484.28320 | 447.33486 | [M-2H+K]-  | 0.535 |
| C28H38O7   | 1 | 485.25430 | 486.26176 | [M-H]-     | 0.383 |



|             |   |           |           |            |       |
|-------------|---|-----------|-----------|------------|-------|
| C23H43O7P   | 1 | 485.26570 | 462.27464 | [M+Na]+    | 3.784 |
| C22H45O9P   | 2 | 485.28880 | 484.28012 | [M+H]+     | 2.899 |
| C27H44O6    | 1 | 485.29060 | 464.31379 | [M-2H+Na]- | 4.428 |
| C29H42O6    | 1 | 485.29060 | 486.29814 | [M-H]-     | 0.558 |
| C30H42N2O2  | 1 | 485.31220 | 462.32463 | [M+Na]+    | 3.398 |
| C28H48O5    | 1 | 485.32690 | 464.35018 | [M-2H+Na]- | 4.253 |
| C25H50O7    | 2 | 485.34430 | 462.35566 | [M+Na]+    | 1.189 |
| C27H48O7    | 2 | 485.34770 | 484.34001 | [M+H]+     | 0.874 |
| C31H50O4    | 1 | 485.36320 | 486.37091 | [M-H]-     | 0.909 |
| C32H54O3    | 2 | 485.39980 | 486.40730 | [M-H]-     | 0.466 |
| C31H60O2    | 1 | 485.43600 | 464.45933 | [M-2H+Na]- | 4.139 |
| C33H58O2    | 1 | 485.43600 | 486.44368 | [M-H]-     | 0.847 |
| C22H44NO7P  | 1 | 486.26020 | 465.28554 | [M-2H+Na]- | 0.004 |
| C22H47N2O5P | 1 | 487.26960 | 450.32226 | [M-2H+K]-  | 2.588 |
| C28H40O7    | 1 | 487.26960 | 488.27741 | [M-H]-     | 1.100 |
| C28H42N2O3S | 1 | 487.30030 | 486.29162 | [M+H]+     | 2.902 |
| C27H46O6    | 1 | 487.30640 | 466.32944 | [M-2H+Na]- | 4.718 |
| C28H50O5    | 1 | 487.34250 | 466.36583 | [M-2H+Na]- | 4.133 |
| C30H48O5    | 2 | 487.34250 | 488.35018 | [M-H]-     | 0.833 |
| C31H52O4    | 1 | 487.37940 | 488.38656 | [M-H]-     | 0.224 |
| C30H56O2    | 1 | 487.39130 | 448.42803 | [M+K]+     | 0.244 |
| C31H62O2    | 1 | 487.45200 | 466.47498 | [M-2H+Na]- | 4.839 |
| C22H44NO7P  | 1 | 488.27510 | 465.28554 | [M+Na]+    | 0.690 |
| C28H39N3O3  | 3 | 488.28670 | 465.29914 | [M+Na]+    | 3.406 |
| C22H43O7P   | 1 | 489.23620 | 450.27464 | [M+K]+     | 3.256 |
| C24H40O8S   | 1 | 489.25060 | 488.24439 | [M+H]+     | 2.173 |
| C29H38O5    | 1 | 489.26050 | 466.27193 | [M+Na]+    | 1.322 |
| C28H42O7    | 1 | 489.28520 | 490.29306 | [M-H]-     | 1.198 |
| C28H44F2O3  | 1 | 489.31340 | 466.32585 | [M+Na]+    | 3.421 |
| C31H46O2    | 1 | 489.31340 | 450.34978 | [M+K]+     | 0.958 |
| C27H48O6    | 1 | 489.32200 | 468.34509 | [M-2H+Na]- | 4.596 |
| C29H46O6    | 1 | 489.32200 | 490.32944 | [M-H]-     | 0.349 |
| C28H50O4    | 1 | 489.33200 | 450.37091 | [M+K]+     | 4.212 |
| C31H46O3    | 1 | 489.33200 | 466.34470 | [M+Na]+    | 3.918 |
| C31H48O3    | 2 | 489.33730 | 468.36035 | [M-2H+Na]- | 4.688 |
| C23H51N2O5P | 1 | 489.34050 | 466.35356 | [M+Na]+    | 4.663 |
| C30H50O5    | 1 | 489.35830 | 490.36583 | [M-H]-     | 0.523 |
| C30H48O5    | 1 | 489.35890 | 488.35018 | [M+H]+     | 2.971 |
| C31H51FO3   | 1 | 489.37310 | 490.38222 | [M-H]-     | 3.789 |
| C32H52O2    | 2 | 489.37310 | 468.39673 | [M-2H+Na]- | 3.492 |
| C31H52O4    | 1 | 489.39220 | 488.38656 | [M+H]+     | 3.333 |
| C31H54O4    | 1 | 489.39490 | 490.40221 | [M-H]-     | 0.084 |
| C30H58O2    | 1 | 489.40520 | 450.44368 | [M+K]+     | 3.333 |
| C20H21O10S  | 6 | 490.03300 | 453.08550 | [M-2H+K]-  | 2.245 |
| C23H50NO6P  | 1 | 490.32860 | 467.33758 | [M+Na]+    | 3.675 |
| C21H41O9P   | 1 | 491.23810 | 468.24882 | [M+Na]+    | 0.114 |
| C25H40O8    | 1 | 491.25950 | 468.27232 | [M+Na]+    | 4.157 |
| C27H42F2O3  | 1 | 491.27100 | 452.31020 | [M+K]+     | 4.790 |
| C30H46O4    | 2 | 491.31650 | 470.33961 | [M-2H+Na]- | 4.537 |
| C25H49O7P   | 1 | 491.31650 | 492.32159 | [M-H]-     | 4.431 |
| C31H50O3    | 2 | 491.35270 | 470.37600 | [M-2H+Na]- | 4.160 |
| C33H48O3    | 1 | 491.35270 | 492.36035 | [M-H]-     | 0.765 |
| C30H52O5    | 1 | 491.37390 | 492.38148 | [M-H]-     | 0.623 |

|             |   |           |           |            |       |
|-------------|---|-----------|-----------|------------|-------|
| C32H54O2    | 2 | 491.38910 | 470.41238 | [M-2H+Na]- | 4.190 |
| C31H54O4    | 1 | 491.40970 | 490.40221 | [M+H]+     | 0.446 |
| C31H64O     | 1 | 491.45980 | 452.49572 | [M+K]+     | 1.900 |
| C33H64O2    | 1 | 491.48320 | 492.49063 | [M-H]-     | 0.328 |
| C20H23O10S  | 5 | 492.04730 | 455.10110 | [M-2H+K]-  | 4.878 |
| C24H41O7P   | 1 | 493.23160 | 472.25899 | [M-2H+Na]- | 4.162 |
| C23H43O9P   | 1 | 493.25940 | 494.26447 | [M-H]-     | 4.454 |
| C29H42O5    | 1 | 493.29000 | 470.30323 | [M+Na]+    | 4.961 |
| C22H47O8P   | 1 | 493.29000 | 470.30086 | [M+Na]+    | 0.160 |
| C27H41F3O3  | 1 | 493.29000 | 470.30078 | [M+Na]+    | 0.004 |
| C31H42O5    | 1 | 493.29560 | 494.30323 | [M-H]-     | 0.722 |
| C30H48O4    | 2 | 493.33190 | 472.35526 | [M-2H+Na]- | 4.012 |
| C25H51O7P   | 1 | 493.33190 | 494.33724 | [M-H]-     | 3.906 |
| C32H46O4    | 1 | 493.33190 | 494.33961 | [M-H]-     | 0.894 |
| C33H48O3    | 1 | 493.36780 | 492.36035 | [M+H]+     | 0.373 |
| C31H52O3    | 1 | 493.36860 | 472.39165 | [M-2H+Na]- | 4.650 |
| C30H52O5    | 2 | 493.38870 | 492.38148 | [M+H]+     | 0.093 |
| C32H56O2    | 1 | 493.40500 | 472.42803 | [M-2H+Na]- | 4.680 |
| C33H66O2    | 1 | 493.49880 | 494.50628 | [M-H]-     | 0.428 |
| C19H38NO9P  | 1 | 494.19280 | 455.22842 | [M+K]+     | 2.485 |
| C28H41NO4   | 1 | 494.26900 | 455.30356 | [M+K]+     | 4.635 |
| C24H48NO7P  | 1 | 494.32460 | 493.31684 | [M+H]+     | 0.987 |
| C30H51NO2   | 1 | 494.33990 | 457.39198 | [M-2H+K]-  | 1.376 |
| C23H37O7P   | 1 | 495.19050 | 456.22769 | [M+K]+     | 0.693 |
| C20H42O7P2  | 1 | 495.20400 | 456.24058 | [M+K]+     | 0.543 |
| C24H40O6S   | 1 | 495.21790 | 456.25456 | [M+K]+     | 0.378 |
| C26H42F2O4  | 1 | 495.26660 | 456.30512 | [M+K]+     | 3.368 |
| C29H46O5    | 1 | 495.31160 | 474.33453 | [M-2H+Na]- | 4.874 |
| C24H49O8P   | 1 | 495.31160 | 496.31651 | [M-H]-     | 4.769 |
| C30H50O4    | 1 | 495.34780 | 474.37091 | [M-2H+Na]- | 4.500 |
| C31H52O3    | 1 | 495.37870 | 472.39165 | [M+Na]+    | 4.374 |
| C32H56O     | 1 | 495.39840 | 456.43312 | [M+K]+     | 4.308 |
| C34H56O2    | 1 | 495.42090 | 496.42803 | [M-H]-     | 0.281 |
| C33H66O2    | 1 | 495.51190 | 494.50628 | [M+H]+     | 3.332 |
| C23H40NO7P  | 1 | 496.24300 | 473.25424 | [M+Na]+    | 0.933 |
| C24H50NO7P  | 3 | 496.34010 | 495.33249 | [M+H]+     | 0.681 |
| C25H54NO6P  | 1 | 496.37820 | 495.36888 | [M+H]+     | 4.136 |
| C22H43O10P  | 1 | 497.25410 | 498.25939 | [M-H]-     | 3.986 |
| C25H40N2O6S | 1 | 497.26780 | 496.26071 | [M+H]+     | 0.364 |
| C23H45O9P   | 1 | 497.28580 | 496.28012 | [M+H]+     | 3.203 |
| C28H44O6    | 1 | 497.29050 | 476.31379 | [M-2H+Na]- | 4.120 |
| C23H47O9P   | 1 | 497.29050 | 498.29577 | [M-H]-     | 4.016 |
| C30H42O6    | 1 | 497.29050 | 498.29814 | [M-H]-     | 0.746 |
| C29H48O5    | 1 | 497.32690 | 476.35018 | [M-2H+Na]- | 4.150 |
| C24H51O8P   | 1 | 497.32690 | 498.33216 | [M-H]-     | 4.046 |
| C30H50O3    | 1 | 497.34160 | 458.37600 | [M+K]+     | 4.934 |
| C32H50O4    | 1 | 497.36340 | 498.37091 | [M-H]-     | 0.485 |
| C34H58O2    | 1 | 497.43600 | 498.44368 | [M-H]-     | 0.826 |
| C23H42NO7P  | 2 | 498.25740 | 475.26989 | [M+Na]+    | 3.438 |
| C22H44NO9P  | 3 | 498.28360 | 497.27537 | [M+H]+     | 1.923 |
| C24H48NO6P  | 1 | 498.29860 | 477.32193 | [M-2H+Na]- | 4.040 |
| C20H32Br2O2 | 4 | 499.02450 | 462.07690 | [M-2H+K]-  | 2.004 |
| C15H29O10P3 | 1 | 499.04610 | 462.09736 | [M-2H+K]-  | 0.275 |

|             |   |           |           |            |       |
|-------------|---|-----------|-----------|------------|-------|
| C26H36O8    | 1 | 499.22790 | 476.24102 | [M+Na]+    | 4.691 |
| C28H44O5    | 1 | 499.28260 | 460.31888 | [M+K]+     | 1.150 |
| C25H50O7    | 1 | 499.30610 | 462.35566 | [M-2H+K]-  | 3.693 |
| C30H44O6    | 1 | 499.30610 | 500.31379 | [M-H]-     | 0.843 |
| C29H50O5    | 1 | 499.34250 | 478.36583 | [M-2H+Na]- | 4.033 |
| C26H52O7    | 1 | 499.36130 | 476.37131 | [M+Na]+    | 1.548 |
| C33H56O3    | 1 | 499.41530 | 500.42295 | [M-H]-     | 0.753 |
| C32H62O2    | 1 | 499.45150 | 478.47498 | [M-2H+Na]- | 3.722 |
| C34H60O2    | 1 | 499.45150 | 500.45933 | [M-H]-     | 1.123 |
| C24H50NO6P  | 1 | 500.31360 | 479.33758 | [M-2H+Na]- | 2.724 |
| C20H32Br2O2 | 3 | 501.03900 | 462.07690 | [M+K]+     | 2.096 |
| C15H29O10P3 | 2 | 501.05860 | 462.09736 | [M+K]+     | 3.818 |
| C25H34O9    | 1 | 501.20920 | 478.22029 | [M+Na]+    | 0.613 |
| C27H44O7    | 1 | 501.28550 | 480.30871 | [M-2H+Na]- | 4.257 |
| C23H49N2O5P | 1 | 501.28550 | 464.33791 | [M-2H+K]-  | 2.017 |
| C30H42N2O2  | 1 | 501.28880 | 462.32463 | [M+K]+     | 2.039 |
| C28H48O6    | 1 | 501.32190 | 480.34509 | [M-2H+Na]- | 4.287 |
| C29H50O4    | 1 | 501.33340 | 462.37091 | [M+K]+     | 1.318 |
| C32H54O4    | 1 | 501.39490 | 502.40221 | [M-H]-     | 0.082 |
| C32H64O2    | 1 | 501.46750 | 480.49063 | [M-2H+Na]- | 4.405 |
| C23H46NO7P  | 2 | 502.29100 | 479.30119 | [M+Na]+    | 1.169 |
| C25H44NO7P  | 4 | 502.29120 | 501.28554 | [M+H]+     | 3.209 |
| C24H50NO6P  | 1 | 502.32890 | 479.33758 | [M+Na]+    | 4.185 |
| C29H36O5    | 1 | 503.21870 | 464.25628 | [M+K]+     | 1.443 |
| C29H36O6    | 1 | 503.23790 | 480.25119 | [M+Na]+    | 4.992 |
| C23H45O8P   | 1 | 503.27690 | 480.28521 | [M+Na]+    | 4.910 |
| C27H44O6    | 1 | 503.27690 | 464.31379 | [M+K]+     | 0.081 |
| C31H44O3    | 1 | 503.29330 | 464.32905 | [M+K]+     | 2.194 |
| C24H49O7P   | 1 | 503.31310 | 480.32159 | [M+Na]+    | 4.542 |
| C28H48O5    | 1 | 503.31310 | 464.35018 | [M+K]+     | 0.449 |
| C31H44O4    | 1 | 503.31310 | 480.32396 | [M+Na]+    | 0.163 |
| C31H52O5    | 1 | 503.37420 | 504.38148 | [M-H]-     | 0.012 |
| C30H58O4    | 1 | 503.41050 | 482.43351 | [M-2H+Na]- | 4.626 |
| C31H62O3    | 1 | 503.44650 | 482.46990 | [M-2H+Na]- | 3.861 |
| C25H39NO6S  | 1 | 504.24050 | 481.24981 | [M+Na]+    | 2.909 |
| C28H39N3O3  | 1 | 504.26180 | 465.29914 | [M+K]+     | 0.976 |
| C24H52NO6P  | 1 | 504.34230 | 481.35323 | [M+Na]+    | 0.293 |
| C30H59NO3   | 1 | 504.44080 | 481.44950 | [M+Na]+    | 4.131 |
| C25H38O8    | 1 | 505.22110 | 466.25667 | [M+K]+     | 2.532 |
| C25H38O9    | 1 | 505.24070 | 482.25159 | [M+Na]+    | 0.212 |
| C24H41O9P   | 3 | 505.25380 | 504.24882 | [M+H]+     | 4.538 |
| C22H43O9P   | 3 | 505.25380 | 482.26447 | [M+Na]+    | 0.210 |
| C27H34F6O2  | 2 | 505.25390 | 504.24630 | [M+H]+     | 0.649 |
| C27H46O5S   | 1 | 505.29620 | 482.30660 | [M+Na]+    | 0.754 |
| C27H48O7    | 1 | 505.31680 | 484.34001 | [M-2H+Na]- | 4.223 |
| C29H46O7    | 1 | 505.31680 | 506.32436 | [M-H]-     | 0.566 |
| C35H46      | 1 | 505.32270 | 466.35995 | [M+K]+     | 0.794 |
| C31H48O4    | 1 | 505.33200 | 484.35526 | [M-2H+Na]- | 4.114 |
| C31H52O5    | 1 | 505.38930 | 504.38148 | [M+H]+     | 1.096 |
| C31H54O5    | 1 | 505.38950 | 506.39713 | [M-H]-     | 0.704 |
| C30H60O3    | 1 | 505.40450 | 468.45425 | [M-2H+K]-  | 3.273 |
| C31H62O3    | 1 | 505.46150 | 482.46990 | [M+Na]+    | 4.715 |
| C34H66O2    | 1 | 505.49890 | 506.50628 | [M-H]-     | 0.220 |

|             |   |           |           |            |       |
|-------------|---|-----------|-----------|------------|-------|
| C22H46NO8P  | 2 | 506.28740 | 483.29611 | [M+Na]+    | 4.093 |
| C26H52NO6P  | 1 | 506.36050 | 505.35323 | [M+H]+     | 0.006 |
| C22H45O8P   | 3 | 507.24810 | 468.28521 | [M+K]+     | 0.509 |
| C27H39F3O3  | 2 | 507.24960 | 468.28513 | [M+K]+     | 2.600 |
| C27H38O9    | 1 | 507.25760 | 506.25159 | [M+H]+     | 2.476 |
| C25H40O9    | 1 | 507.25760 | 484.26724 | [M+Na]+    | 2.253 |
| C24H43O9P   | 3 | 507.26970 | 506.26447 | [M+H]+     | 4.027 |
| C27H42F2O4  | 1 | 507.26970 | 468.30512 | [M+K]+     | 2.823 |
| C27H36F6O2  | 2 | 507.26970 | 506.26195 | [M+H]+     | 0.942 |
| C22H45O9P   | 1 | 507.26970 | 484.28012 | [M+Na]+    | 0.702 |
| C29H46O7    | 3 | 507.32980 | 506.32436 | [M+H]+     | 3.599 |
| C27H48O7    | 1 | 507.32980 | 484.34001 | [M+Na]+    | 1.129 |
| C31H48O4    | 1 | 507.34300 | 484.35526 | [M+Na]+    | 2.921 |
| C31H50O4    | 1 | 507.34780 | 486.37091 | [M-2H+Na]- | 4.393 |
| C32H52O2    | 1 | 507.36020 | 468.39673 | [M+K]+     | 0.629 |
| C32H54O3    | 2 | 507.38370 | 486.40730 | [M-2H+Na]- | 3.437 |
| C31H54O5    | 2 | 507.40610 | 506.39713 | [M+H]+     | 3.358 |
| C33H58O2    | 1 | 507.42040 | 486.44368 | [M-2H+Na]- | 4.058 |
| C34H68O2    | 1 | 507.51460 | 508.52193 | [M-H]-     | 0.120 |
| C20H40NO9P  | 1 | 508.20710 | 469.24407 | [M+K]+     | 0.240 |
| C28H42N2O3S | 1 | 509.28120 | 486.29162 | [M+Na]+    | 0.713 |
| C30H48O5    | 2 | 509.32630 | 488.35018 | [M-2H+Na]- | 2.874 |
| C32H46O5    | 1 | 509.32630 | 510.33453 | [M-H]-     | 1.877 |
| C31H52O4    | 1 | 509.36300 | 488.38656 | [M-2H+Na]- | 3.493 |
| C33H50O4    | 1 | 509.36300 | 510.37091 | [M-H]-     | 1.258 |
| C32H54O2    | 1 | 509.37610 | 470.41238 | [M+K]+     | 1.117 |
| C30H52O6    | 2 | 509.38440 | 508.37639 | [M+H]+     | 1.451 |
| C34H68O2    | 1 | 509.52950 | 508.52193 | [M+H]+     | 0.587 |
| C24H48NO8P  | 2 | 510.31880 | 509.31176 | [M+H]+     | 0.445 |
| C21H29IO4   | 1 | 511.07250 | 472.10698 | [M+K]+     | 4.630 |
| C30H48O4    | 1 | 511.31810 | 472.35526 | [M+K]+     | 0.608 |
| C30H50O5    | 1 | 511.34220 | 490.36583 | [M-2H+Na]- | 3.352 |
| C32H48O5    | 1 | 511.34220 | 512.35018 | [M-H]-     | 1.381 |
| C33H50O4    | 1 | 511.37570 | 510.37091 | [M+H]+     | 4.852 |
| C31H54O4    | 1 | 511.37870 | 490.40221 | [M-2H+Na]- | 3.577 |
| C24H50NO8P  | 4 | 512.33470 | 511.32741 | [M+H]+     | 0.045 |
| C31H45NO5   | 3 | 512.33490 | 511.32977 | [M+H]+     | 4.185 |
| C26H42NO7S  | 1 | 513.27360 | 512.26820 | [M+H]+     | 3.647 |
| C29H46O5    | 1 | 513.29840 | 474.33453 | [M+K]+     | 1.410 |
| C26H52O7    | 1 | 513.32190 | 476.37131 | [M-2H+K]-  | 3.885 |
| C30H50O3S   | 2 | 513.33820 | 490.34807 | [M+Na]+    | 1.775 |
| C30H52O5    | 1 | 513.35790 | 492.38148 | [M-2H+Na]- | 3.436 |
| C33H64O2    | 1 | 513.46760 | 492.49063 | [M-2H+Na]- | 4.497 |
| C25H49O7P   | 1 | 515.31230 | 492.32159 | [M+Na]+    | 2.884 |
| C29H48O5    | 1 | 515.31230 | 476.35018 | [M+K]+     | 1.991 |
| C31H48O6    | 1 | 515.33720 | 516.34509 | [M-H]-     | 1.205 |
| C33H56O4    | 1 | 515.41020 | 516.41786 | [M-H]-     | 0.759 |
| C33H66O2    | 1 | 515.48320 | 494.50628 | [M-2H+Na]- | 4.382 |
| C24H48NO6P  | 1 | 516.28410 | 477.32193 | [M+K]+     | 1.892 |
| C26H45NO7S  | 1 | 516.29700 | 515.29168 | [M+H]+     | 3.771 |
| C24H30O11   | 1 | 517.16840 | 494.17882 | [M+Na]+    | 0.702 |
| C23H43O9P   | 1 | 517.25330 | 494.26447 | [M+Na]+    | 0.762 |
| C30H46O7    | 1 | 517.31650 | 518.32436 | [M-H]-     | 1.133 |

|             |   |           |           |                        |       |
|-------------|---|-----------|-----------|------------------------|-------|
| C27H48O9    | 2 | 517.33630 | 516.32984 | [M+H] <sup>+</sup>     | 1.558 |
| C32H54O5    | 1 | 517.38980 | 518.39713 | [M-H] <sup>-</sup>     | 0.108 |
| C33H56O4    | 1 | 517.42600 | 516.41786 | [M+H] <sup>+</sup>     | 1.679 |
| C33H66O2    | 1 | 517.49350 | 494.50628 | [M+Na] <sup>+</sup>    | 3.869 |
| C24H50NO7P  | 1 | 518.31970 | 495.33249 | [M+Na] <sup>+</sup>    | 3.884 |
| C26H48NO7P  | 1 | 518.32470 | 517.31684 | [M+H] <sup>+</sup>     | 1.134 |
| C25H33ClO8  | 1 | 519.17350 | 496.18640 | [M+Na] <sup>+</sup>    | 4.083 |
| C25H36O9    | 1 | 519.20120 | 480.23594 | [M+K] <sup>+</sup>     | 4.072 |
| C30H30O8    | 1 | 519.20120 | 518.19407 | [M+H] <sup>+</sup>     | 0.272 |
| C25H44O7P2  | 4 | 519.26100 | 518.25623 | [M+H] <sup>+</sup>     | 4.816 |
| C23H45O9P   | 1 | 519.27050 | 496.28012 | [M+Na] <sup>+</sup>    | 2.226 |
| C27H44O7    | 2 | 519.27410 | 480.30871 | [M+K] <sup>+</sup>     | 4.321 |
| C32H48O3    | 1 | 519.32520 | 480.36035 | [M+K] <sup>+</sup>     | 3.281 |
| C32H50O4    | 1 | 519.34710 | 498.37091 | [M-2H+Na] <sup>-</sup> | 2.944 |
| C34H48O4    | 1 | 519.34710 | 520.35526 | [M-H] <sup>-</sup>     | 1.716 |
| C35H68O2    | 1 | 519.51400 | 520.52193 | [M-H] <sup>-</sup>     | 1.272 |
| C23H48NO7P  | 1 | 520.27790 | 481.31684 | [M+K] <sup>+</sup>     | 4.021 |
| C26H50NO7P  | 1 | 520.34020 | 519.33249 | [M+H] <sup>+</sup>     | 0.842 |
| C31H63NO3   | 2 | 520.46900 | 497.48080 | [M+Na] <sup>+</sup>    | 1.952 |
| C25H35ClO8  | 3 | 521.19010 | 498.20205 | [M+Na] <sup>+</sup>    | 2.245 |
| C25H46O7P2  | 1 | 521.28090 | 520.27188 | [M+H] <sup>+</sup>     | 3.355 |
| C35H46O2    | 1 | 521.33970 | 498.34978 | [M+Na] <sup>+</sup>    | 1.339 |
| C34H50O4    | 1 | 521.36300 | 522.37091 | [M-H] <sup>-</sup>     | 1.229 |
| C30H58O4    | 1 | 521.39790 | 482.43351 | [M+K] <sup>+</sup>     | 2.376 |
| C33H56O3    | 1 | 521.39960 | 500.42295 | [M-2H+Na] <sup>-</sup> | 3.824 |
| C31H62O3    | 1 | 521.43060 | 482.46990 | [M+K] <sup>+</sup>     | 4.691 |
| C34H58O2    | 1 | 521.43060 | 498.44368 | [M+Na] <sup>+</sup>    | 4.415 |
| C35H68O2    | 1 | 521.53150 | 520.52193 | [M+H] <sup>+</sup>     | 4.408 |
| C22H27O10S  | 1 | 522.09480 | 483.13250 | [M+K] <sup>+</sup>     | 1.628 |
| C21H42NO9P  | 1 | 522.22190 | 483.25972 | [M+K] <sup>+</sup>     | 1.861 |
| C25H42NO7P  | 2 | 522.26170 | 499.26989 | [M+Na] <sup>+</sup>    | 4.953 |
| C22H46NO8P  | 1 | 522.26170 | 483.29611 | [M+K] <sup>+</sup>     | 4.678 |
| C26H52NO7P  | 2 | 522.35560 | 521.34814 | [M+H] <sup>+</sup>     | 0.360 |
| C27H49BrO2  | 1 | 523.25480 | 484.29159 | [M+K] <sup>+</sup>     | 0.113 |
| C30H44O5    | 1 | 523.27970 | 484.31888 | [M+K] <sup>+</sup>     | 4.445 |
| C26H53O8P   | 1 | 523.34260 | 524.34781 | [M-H] <sup>-</sup>     | 3.940 |
| C32H54O4    | 1 | 523.37880 | 502.40221 | [M-2H+Na] <sup>-</sup> | 3.686 |
| C36H60O2    | 2 | 523.45220 | 524.45933 | [M-H] <sup>-</sup>     | 0.266 |
| C25H44NO7P  | 1 | 524.27460 | 501.28554 | [M+Na] <sup>+</sup>    | 0.311 |
| C26H54NO7P  | 1 | 524.36860 | 523.36379 | [M+H] <sup>+</sup>     | 4.695 |
| C25H43O7P   | 1 | 525.23600 | 486.27464 | [M+K] <sup>+</sup>     | 3.414 |
| C22H46O8S2  | 1 | 525.25410 | 502.26342 | [M+Na] <sup>+</sup>    | 2.785 |
| C28H42N2O3S | 1 | 525.25410 | 486.29162 | [M+K] <sup>+</sup>     | 1.268 |
| C31H52O5    | 1 | 525.35820 | 504.38148 | [M-2H+Na] <sup>-</sup> | 3.929 |
| C26H55O8P   | 1 | 525.35820 | 526.36346 | [M-H] <sup>-</sup>     | 3.828 |
| C33H58O2    | 1 | 525.40660 | 486.44368 | [M+K] <sup>+</sup>     | 0.440 |
| C35H58O3    | 1 | 525.43090 | 526.43860 | [M-H] <sup>-</sup>     | 0.811 |
| C34H68O3    | 1 | 525.52170 | 524.51685 | [M+H] <sup>+</sup>     | 4.597 |
| C24H48NO9P  | 2 | 526.31450 | 525.30667 | [M+H] <sup>+</sup>     | 1.060 |
| C33H67NO3   | 1 | 526.51710 | 525.51210 | [M+H] <sup>+</sup>     | 4.302 |
| C24H40O8S   | 1 | 527.20510 | 488.24439 | [M+K] <sup>+</sup>     | 4.634 |
| C30H52O3Si  | 1 | 527.33030 | 488.36858 | [M+K] <sup>+</sup>     | 2.706 |
| C31H54O5    | 1 | 527.37380 | 506.39713 | [M-2H+Na] <sup>-</sup> | 3.819 |

|            |   |           |           |            |       |
|------------|---|-----------|-----------|------------|-------|
| C35H60O3   | 1 | 527.44640 | 528.45425 | [M-H]-     | 1.092 |
| C34H66O2   | 1 | 527.48290 | 506.50628 | [M-2H+Na]- | 3.714 |
| C36H64O2   | 1 | 527.48290 | 528.49063 | [M-H]-     | 0.874 |
| C29H46O6   | 1 | 529.29180 | 490.32944 | [M+K]+     | 1.494 |
| C27H45O8P  | 1 | 529.29180 | 528.28521 | [M+H]+     | 1.281 |
| C30H52O6   | 1 | 529.35350 | 508.37639 | [M-2H+Na]- | 4.626 |
| C32H50O6   | 1 | 529.35350 | 530.36074 | [M-H]-     | 0.055 |
| C31H54O4   | 1 | 529.36440 | 490.40221 | [M+K]+     | 1.815 |
| C35H60O3   | 4 | 529.46120 | 528.45425 | [M+H]+     | 0.597 |
| C35H62O3   | 1 | 529.46250 | 530.46990 | [M-H]-     | 0.238 |
| C25H50NO7P | 1 | 530.31990 | 507.33249 | [M+Na]+    | 3.419 |
| C26H54NO6P | 1 | 530.35660 | 507.36888 | [M+Na]+    | 2.825 |
| C27H40O6S  | 1 | 531.22020 | 492.25456 | [M+K]+     | 4.682 |
| C22H43O12P | 1 | 531.25750 | 530.24922 | [M+H]+     | 1.905 |
| C25H49O7P  | 1 | 531.28580 | 492.32159 | [M+K]+     | 1.990 |
| C33H48O3   | 1 | 531.32100 | 492.36035 | [M+K]+     | 4.698 |
| C40H50     | 1 | 531.39920 | 530.39125 | [M+H]+     | 1.278 |
| C34H60O4   | 1 | 531.44190 | 532.44916 | [M-H]-     | 0.017 |
| C35H62O3   | 1 | 531.47630 | 530.46990 | [M+H]+     | 1.629 |
| C34H68O2   | 1 | 531.51210 | 508.52193 | [M+Na]+    | 1.784 |
| C24H48NO7P | 1 | 532.28120 | 493.31684 | [M+K]+     | 2.269 |
| C26H56NO6P | 1 | 532.37260 | 509.38453 | [M+Na]+    | 2.156 |
| C25H33ClO8 | 1 | 533.13250 | 496.18640 | [M-2H+K]-  | 4.687 |
| C23H43O9P  | 1 | 533.22510 | 494.26447 | [M+K]+     | 4.732 |
| C28H46O7   | 1 | 533.28530 | 494.32436 | [M+K]+     | 4.137 |
| C26H45O9P  | 2 | 533.28530 | 532.28012 | [M+H]+     | 3.925 |
| C24H47O9P  | 2 | 533.28530 | 510.29577 | [M+Na]+    | 0.574 |
| C32H46O4   | 1 | 533.30500 | 494.33961 | [M+K]+     | 4.198 |
| C40H52     | 1 | 533.41470 | 532.40690 | [M+H]+     | 0.992 |
| C34H60O4   | 3 | 533.45780 | 532.44916 | [M+H]+     | 2.566 |
| C33H66O3   | 1 | 533.48790 | 510.50120 | [M+Na]+    | 4.718 |
| C36H70O2   | 1 | 533.52980 | 534.53758 | [M-H]-     | 0.958 |
| C23H45O9P  | 1 | 535.24140 | 496.28012 | [M+K]+     | 3.499 |
| C30H40O7   | 1 | 535.26400 | 512.27741 | [M+Na]+    | 4.908 |
| C31H44O3S  | 1 | 535.26400 | 496.30112 | [M+K]+     | 0.501 |
| C30H46O8   | 2 | 535.32580 | 534.31927 | [M+H]+     | 1.384 |
| C32H48O5   | 1 | 535.34090 | 512.35018 | [M+Na]+    | 2.808 |
| C27H53O8P  | 1 | 535.34250 | 536.34781 | [M-H]-     | 3.665 |
| C22H44NO9P | 1 | 536.23990 | 497.27537 | [M+K]+     | 2.570 |
| C26H50NO8P | 1 | 536.33510 | 535.32741 | [M+H]+     | 0.789 |
| C27H54NO7P | 1 | 536.37000 | 535.36379 | [M+H]+     | 1.980 |
| C35H53NO3  | 1 | 536.40760 | 535.40255 | [M+H]+     | 4.129 |
| C28H58NO6P | 1 | 536.40760 | 535.40018 | [M+H]+     | 0.285 |
| C31H63NO3  | 1 | 536.44210 | 497.48080 | [M+K]+     | 3.439 |
| C24H34O11  | 2 | 537.17210 | 498.21012 | [M+K]+     | 2.171 |
| C26H49O9P  | 1 | 537.31630 | 536.31142 | [M+H]+     | 4.454 |
| C32H50O4   | 1 | 537.33150 | 498.37091 | [M+K]+     | 4.766 |
| C27H53O8P  | 1 | 537.35320 | 536.34781 | [M+H]+     | 3.495 |
| C33H56O4   | 1 | 537.39470 | 516.41786 | [M-2H+Na]- | 4.055 |
| C36H72O2   | 1 | 537.56080 | 536.55323 | [M+H]+     | 0.556 |
| C26H46NO7P | 1 | 538.29170 | 515.30119 | [M+Na]+    | 2.391 |
| C26H52NO8P | 1 | 538.34890 | 537.34306 | [M+H]+     | 2.651 |
| C27H56NO7P | 1 | 538.38560 | 537.37944 | [M+H]+     | 2.065 |

|              |   |           |           |                        |       |
|--------------|---|-----------|-----------|------------------------|-------|
| C28H60NO6P   | 1 | 538.42310 | 537.41583 | [M+H] <sup>+</sup>     | 0.006 |
| C25H37ClO8   | 1 | 539.17930 | 500.21770 | [M+K] <sup>+</sup>     | 2.873 |
| C27H35ClO9   | 1 | 539.20310 | 538.19696 | [M+H] <sup>+</sup>     | 2.103 |
| C30H44O7     | 1 | 539.29820 | 516.30871 | [M+Na] <sup>+</sup>    | 0.506 |
| C27H48O8     | 1 | 539.29820 | 500.33492 | [M+K] <sup>+</sup>     | 0.239 |
| C31H48O6     | 2 | 539.33700 | 516.34509 | [M+Na] <sup>+</sup>    | 4.984 |
| C26H51O9P    | 2 | 539.33700 | 538.32707 | [M+H] <sup>+</sup>     | 4.926 |
| C33H56O3     | 1 | 539.38390 | 500.42295 | [M+K] <sup>+</sup>     | 4.071 |
| C34H60O2     | 2 | 539.42210 | 500.45933 | [M+K] <sup>+</sup>     | 0.706 |
| C40H58       | 1 | 539.46200 | 538.45385 | [M+H] <sup>+</sup>     | 1.629 |
| C37H62O2     | 1 | 539.48140 | 538.47498 | [M+H] <sup>+</sup>     | 1.577 |
| C23H44N2O8PS | 1 | 540.26430 | 539.25550 | [M+H] <sup>+</sup>     | 2.832 |
| C25H50NO9P   | 2 | 540.32920 | 539.32232 | [M+H] <sup>+</sup>     | 0.725 |
| C26H54NO8P   | 2 | 540.36620 | 539.35871 | [M+H] <sup>+</sup>     | 0.413 |
| C30H30O8     | 1 | 541.18570 | 518.19407 | [M+Na] <sup>+</sup>    | 4.450 |
| C27H37ClO9   | 1 | 541.22090 | 540.21261 | [M+H] <sup>+</sup>     | 1.877 |
| C27H38F6O4   | 1 | 541.27310 | 540.26743 | [M+H] <sup>+</sup>     | 2.960 |
| C32H54O4     | 1 | 541.36740 | 502.40221 | [M+K] <sup>+</sup>     | 3.766 |
| C37H48O3     | 1 | 541.36740 | 540.36035 | [M+H] <sup>+</sup>     | 0.399 |
| C35H58O4     | 1 | 541.42590 | 542.43351 | [M-H] <sup>-</sup>     | 0.630 |
| C40H60       | 2 | 541.47740 | 540.46950 | [M+H] <sup>+</sup>     | 1.162 |
| C24H42NO9P   | 1 | 542.24670 | 519.25972 | [M+Na] <sup>+</sup>    | 4.136 |
| C27H36O9     | 1 | 543.19700 | 504.23594 | [M+K] <sup>+</sup>     | 3.840 |
| C33H52O6     | 1 | 543.36850 | 544.37639 | [M-H] <sup>-</sup>     | 1.143 |
| C35H58O4     | 1 | 543.44020 | 542.43351 | [M+H] <sup>+</sup>     | 1.069 |
| C35H60O4     | 1 | 543.44130 | 544.44916 | [M-H] <sup>-</sup>     | 1.088 |
| C28H50NO7P   | 1 | 544.33840 | 543.33249 | [M+H] <sup>+</sup>     | 2.502 |
| C26H32F6O3   | 1 | 545.18640 | 506.22557 | [M+K] <sup>+</sup>     | 4.250 |
| C33H52O6     | 1 | 545.38160 | 544.37639 | [M+H] <sup>+</sup>     | 3.779 |
| C35H60O4     | 4 | 545.45700 | 544.44916 | [M+H] <sup>+</sup>     | 1.043 |
| C35H62O4     | 1 | 545.45780 | 546.46481 | [M-H] <sup>-</sup>     | 0.475 |
| C34H68O3     | 1 | 545.49370 | 524.51685 | [M-2H+Na] <sup>-</sup> | 4.022 |
| C40H64       | 1 | 545.50960 | 544.50080 | [M+H] <sup>+</sup>     | 2.803 |
| C35H70O2     | 1 | 545.52630 | 522.53758 | [M+Na] <sup>+</sup>    | 0.920 |
| C25H50NO7P   | 1 | 546.29600 | 507.33249 | [M+K] <sup>+</sup>     | 0.655 |
| C25H50NO8P   | 1 | 546.31570 | 523.32741 | [M+Na] <sup>+</sup>    | 1.699 |
| C26H54NO7P   | 1 | 546.35530 | 523.36379 | [M+Na] <sup>+</sup>    | 4.186 |
| C28H52NO7P   | 1 | 546.35530 | 545.34814 | [M+H] <sup>+</sup>     | 0.205 |
| C25H32O11    | 1 | 547.15830 | 508.19447 | [M+K] <sup>+</sup>     | 1.250 |
| C25H49O9P    | 1 | 547.29820 | 524.31142 | [M+Na] <sup>+</sup>    | 4.466 |
| C35H62O4     | 6 | 547.47320 | 546.46481 | [M+H] <sup>+</sup>     | 2.044 |
| C37H72O2     | 1 | 547.54540 | 548.55323 | [M-H] <sup>-</sup>     | 1.025 |
| C23H44NO9P   | 1 | 548.23690 | 509.27537 | [M+K] <sup>+</sup>     | 2.959 |
| C24H48NO9P   | 1 | 548.29410 | 525.30667 | [M+Na] <sup>+</sup>    | 3.270 |
| C32H63NO3    | 1 | 548.44660 | 509.48080 | [M+K] <sup>+</sup>     | 4.841 |
| C25H51O9P    | 1 | 549.31840 | 526.32707 | [M+Na] <sup>+</sup>    | 3.834 |
| C33H50O4     | 1 | 549.33670 | 510.37091 | [M+K] <sup>+</sup>     | 4.804 |
| C31H60O5     | 1 | 549.39520 | 512.44408 | [M-2H+K] <sup>-</sup>  | 4.594 |
| C35H58O3     | 2 | 549.42960 | 526.43860 | [M+Na] <sup>+</sup>    | 3.245 |
| C36H62O2     | 2 | 549.46610 | 526.47498 | [M+Na] <sup>+</sup>    | 3.454 |
| C33H66O3     | 2 | 549.46610 | 510.50120 | [M+K] <sup>+</sup>     | 3.192 |
| C35H66O4     | 1 | 549.48820 | 550.49611 | [M-H] <sup>-</sup>     | 1.167 |
| C40H68       | 1 | 549.53870 | 548.53210 | [M+H] <sup>+</sup>     | 1.221 |

|              |   |           |           |            |       |
|--------------|---|-----------|-----------|------------|-------|
| C24H31O11S   | 1 | 550.14850 | 527.15871 | [M+Na]+    | 1.029 |
| C22H42NO10P  | 1 | 550.21990 | 511.25464 | [M+K]+     | 3.840 |
| C23H46NO9P   | 2 | 550.25640 | 511.29102 | [M+K]+     | 4.049 |
| C27H52NO8P   | 1 | 550.35080 | 549.34306 | [M+H]+     | 0.859 |
| C32H65NO3    | 2 | 550.46230 | 511.49645 | [M+K]+     | 4.914 |
| C25H33ClO9   | 1 | 551.14550 | 512.18131 | [M+K]+     | 1.880 |
| C26H42NO7S   | 1 | 551.22940 | 512.26820 | [M+K]+     | 3.541 |
| C24H49O9P    | 1 | 551.27230 | 512.31142 | [M+K]+     | 4.123 |
| C40H48       | 1 | 551.36750 | 528.37560 | [M+Na]+    | 4.857 |
| C36H64O2     | 1 | 551.48190 | 528.49063 | [M+Na]+    | 3.714 |
| C38H62O2     | 2 | 551.48190 | 550.47498 | [M+H]+     | 0.636 |
| C35H66O4     | 6 | 551.50400 | 550.49611 | [M+H]+     | 1.122 |
| C26H43NO8S   | 1 | 552.25940 | 529.27094 | [M+Na]+    | 1.382 |
| C29H62NO6P   | 1 | 552.43820 | 551.43148 | [M+H]+     | 0.990 |
| C30H42O7     | 1 | 553.25360 | 514.29306 | [M+K]+     | 4.710 |
| C26H43O9P    | 2 | 553.25360 | 530.26447 | [M+Na]+    | 0.170 |
| C30H42O8     | 1 | 553.27510 | 530.28797 | [M+Na]+    | 3.781 |
| C29H44O10    | 1 | 553.30100 | 552.29345 | [M+H]+     | 0.504 |
| C40H50       | 1 | 553.37990 | 530.39125 | [M+Na]+    | 1.034 |
| C34H60O4     | 1 | 553.42580 | 532.44916 | [M-2H+Na]- | 3.576 |
| C35H62O3     | 4 | 553.45960 | 530.46990 | [M+Na]+    | 0.873 |
| C26H48NO7P   | 1 | 554.26460 | 517.31684 | [M-2H+K]-  | 1.519 |
| C26H51O10P   | 1 | 555.32690 | 554.32199 | [M+H]+     | 4.246 |
| C31H48O7     | 1 | 555.32690 | 532.34001 | [M+Na]+    | 4.190 |
| C40H52       | 1 | 555.39650 | 532.40690 | [M+Na]+    | 0.681 |
| C24H40NO9P   | 1 | 556.20540 | 517.24407 | [M+K]+     | 3.276 |
| C27H37ClO10  | 1 | 557.21440 | 556.20753 | [M+H]+     | 0.716 |
| C26H36O13    | 1 | 557.22200 | 556.21560 | [M+H]+     | 1.554 |
| C40H54       | 1 | 557.40980 | 534.42255 | [M+Na]+    | 3.538 |
| C40H60O      | 1 | 557.47290 | 556.46442 | [M+H]+     | 2.178 |
| C38H68O2     | 1 | 557.53080 | 556.52193 | [M+H]+     | 2.868 |
| C24H42NO9P   | 1 | 558.22430 | 519.25972 | [M+K]+     | 2.558 |
| C28H58NO6P   | 1 | 558.39120 | 535.40018 | [M+Na]+    | 3.227 |
| C35H53NO3    | 1 | 558.39120 | 535.40255 | [M+Na]+    | 1.014 |
| C29H45BrO3   | 1 | 559.21710 | 520.25521 | [M+K]+     | 2.246 |
| C25H46O7P2   | 1 | 559.23240 | 520.27188 | [M+K]+     | 4.705 |
| C27H39ClO10  | 1 | 559.23240 | 558.22318 | [M+H]+     | 3.489 |
| C34H48O4     | 1 | 559.31760 | 520.35526 | [M+K]+     | 1.450 |
| C40H56       | 1 | 559.42540 | 536.43820 | [M+Na]+    | 3.614 |
| C36H64O4     | 2 | 559.47320 | 560.48046 | [M-H]-     | 0.016 |
| C37H68O3     | 1 | 559.50900 | 560.51685 | [M-H]-     | 1.029 |
| C36H72O2     | 1 | 559.54120 | 536.55323 | [M+Na]+    | 2.238 |
| C26H36BrNO3S | 1 | 560.12100 | 521.15993 | [M+K]+     | 3.708 |
| C25H48NO9P   | 1 | 560.29580 | 537.30667 | [M+Na]+    | 0.166 |
| C26H52NO8P   | 1 | 560.33290 | 537.34306 | [M+Na]+    | 1.110 |
| C27H56NO7P   | 1 | 560.36930 | 537.37944 | [M+Na]+    | 1.137 |
| C35H49N3O3   | 1 | 560.38700 | 559.37739 | [M+H]+     | 4.172 |
| C27H35ClO9   | 1 | 561.18710 | 538.19696 | [M+Na]+    | 1.630 |
| C26H51O9P    | 1 | 561.31510 | 538.32707 | [M+Na]+    | 2.127 |
| C32H48O8     | 1 | 561.34050 | 560.33492 | [M+H]+     | 3.012 |
| C40H58       | 2 | 561.44220 | 538.45385 | [M+Na]+    | 1.553 |
| C36H64O4     | 6 | 561.48860 | 560.48046 | [M+H]+     | 1.548 |
| C27H58NO6P   | 1 | 562.36210 | 523.40018 | [M+K]+     | 2.182 |



|            |   |           |           |            |       |
|------------|---|-----------|-----------|------------|-------|
| C33H65NO3  | 1 | 562.45820 | 523.49645 | [M+K]+     | 2.480 |
| C25H34O13  | 1 | 563.17270 | 542.19995 | [M-2H+Na]- | 3.384 |
| C40H50O2   | 1 | 563.38970 | 562.38108 | [M+H]+     | 2.394 |
| C33H54O7   | 1 | 563.39440 | 562.38696 | [M+H]+     | 0.309 |
| C35H64O5   | 1 | 563.46860 | 564.47538 | [M-H]-     | 0.877 |
| C35H62O5   | 4 | 563.46960 | 562.45973 | [M+H]+     | 4.621 |
| C34H68O3   | 2 | 563.48170 | 524.51685 | [M+K]+     | 3.024 |
| C24H48NO9P | 1 | 564.27060 | 525.30667 | [M+K]+     | 1.379 |
| C29H51NO6S | 1 | 564.33360 | 541.34371 | [M+Na]+    | 1.182 |
| C28H54NO8P | 1 | 564.36510 | 563.35871 | [M+H]+     | 1.554 |
| C33H67NO3  | 1 | 564.47490 | 525.51210 | [M+K]+     | 0.611 |
| C23H43O12P | 1 | 565.24060 | 542.24922 | [M+Na]+    | 3.823 |
| C27H45O9P  | 1 | 565.25440 | 544.28012 | [M-2H+Na]- | 0.678 |
| C36H62O3   | 2 | 565.45800 | 542.46990 | [M+Na]+    | 1.975 |
| C35H64O5   | 4 | 565.48270 | 564.47538 | [M+H]+     | 0.095 |
| C27H48NO7P | 1 | 566.26420 | 529.31684 | [M-2H+K]-  | 2.193 |
| C28H50NO7P | 2 | 566.32450 | 543.33249 | [M+Na]+    | 4.921 |
| C24H32O12S | 1 | 567.15180 | 544.16145 | [M+Na]+    | 1.985 |
| C28H55O9P  | 1 | 567.36780 | 566.35837 | [M+H]+     | 3.800 |
| C40H54O2   | 1 | 567.42070 | 566.41238 | [M+H]+     | 1.849 |
| C35H60O4   | 1 | 567.44100 | 544.44916 | [M+Na]+    | 4.614 |
| C36H64O2   | 1 | 567.45640 | 528.49063 | [M+K]+     | 4.615 |
| C41H58O    | 1 | 567.45640 | 566.44877 | [M+H]+     | 0.641 |
| C37H74O3   | 1 | 567.57120 | 566.56380 | [M+H]+     | 0.236 |
| C26H43NO8S | 2 | 568.23310 | 529.27094 | [M+K]+     | 1.746 |
| C27H48NO7P | 1 | 568.27900 | 529.31684 | [M+K]+     | 1.746 |
| C27H54NO9P | 1 | 568.36290 | 567.35362 | [M+H]+     | 3.533 |
| C35H63NO3  | 2 | 568.46890 | 545.48080 | [M+Na]+    | 1.963 |
| C22H43O12P | 2 | 569.21410 | 530.24922 | [M+K]+     | 3.043 |
| C33H54O6   | 1 | 569.38160 | 546.39204 | [M+Na]+    | 0.594 |
| C28H57O9P  | 2 | 569.38160 | 568.37402 | [M+H]+     | 0.537 |
| C28H44NO9P | 1 | 570.28070 | 569.27537 | [M+H]+     | 3.405 |
| C26H46NO9P | 1 | 570.28070 | 547.29102 | [M+Na]+    | 0.801 |
| C28H54NO7P | 1 | 570.35390 | 547.36379 | [M+Na]+    | 1.555 |
| C31H48O7   | 1 | 571.30370 | 532.34001 | [M+K]+     | 0.952 |
| C40H52O    | 1 | 571.39360 | 548.40182 | [M+Na]+    | 4.486 |
| C27H52NO8P | 3 | 572.33050 | 549.34306 | [M+Na]+    | 3.107 |
| C29H42O10  | 1 | 573.26880 | 550.27780 | [M+Na]+    | 3.102 |
| C40H54     | 1 | 573.38820 | 534.42255 | [M+K]+     | 4.358 |
| C36H70O2   | 2 | 573.49830 | 534.53758 | [M+K]+     | 4.239 |
| C36H72O3   | 1 | 573.52460 | 552.54815 | [M-2H+Na]- | 3.128 |
| C26H50NO9P | 1 | 574.31340 | 551.32232 | [M+Na]+    | 3.233 |
| C28H48NO9P | 1 | 574.31340 | 573.30667 | [M+H]+     | 0.944 |
| C27H54NO7P | 2 | 574.32820 | 535.36379 | [M+K]+     | 2.190 |
| C29H44O9   | 1 | 575.26010 | 536.29854 | [M+K]+     | 2.757 |
| C27H53O8P  | 1 | 575.31190 | 536.34781 | [M+K]+     | 1.637 |
| C40H56     | 1 | 575.40130 | 536.43820 | [M+K]+     | 0.089 |
| C40H56O    | 1 | 575.42000 | 552.43312 | [M+Na]+    | 4.061 |
| C32H62O8   | 1 | 575.44990 | 574.44447 | [M+H]+     | 3.199 |
| C40H62O2   | 1 | 575.48490 | 574.47498 | [M+H]+     | 4.603 |
| C36H72O2   | 1 | 575.51610 | 536.55323 | [M+K]+     | 0.488 |
| C36H72O3   | 2 | 575.54000 | 552.54815 | [M+Na]+    | 4.575 |
| C25H45O11S | 1 | 576.25870 | 553.26830 | [M+Na]+    | 2.046 |

|            |   |           |           |            |       |
|------------|---|-----------|-----------|------------|-------|
| C26H52NO8P | 1 | 576.30740 | 537.34306 | [M+K]+     | 2.070 |
| C30H58NO7P | 2 | 576.40460 | 575.39509 | [M+H]+     | 3.883 |
| C34H67NO3  | 1 | 576.47450 | 537.51210 | [M+K]+     | 1.292 |
| C35H71NO3  | 1 | 576.53380 | 553.54340 | [M+Na]+    | 2.054 |
| C26H51O10P | 1 | 577.30910 | 554.32199 | [M+Na]+    | 3.653 |
| C35H60O6   | 1 | 577.44760 | 576.43899 | [M+H]+     | 2.319 |
| C32H64O8   | 1 | 577.46790 | 576.46012 | [M+H]+     | 0.881 |
| C36H64O5   | 2 | 577.48400 | 576.47538 | [M+H]+     | 2.345 |
| C38H66O2   | 2 | 577.49760 | 554.50628 | [M+Na]+    | 3.633 |
| C40H74     | 1 | 577.56610 | 554.57905 | [M+Na]+    | 3.761 |
| C39H76O2   | 1 | 577.58950 | 576.58453 | [M+H]+     | 3.984 |
| C28H52NO9P | 1 | 578.34800 | 577.33797 | [M+H]+     | 4.769 |
| C29H56NO8P | 1 | 578.38090 | 577.37436 | [M+H]+     | 1.257 |
| C34H69NO3  | 2 | 578.49310 | 539.52775 | [M+K]+     | 3.812 |
| C34H69NO4  | 2 | 578.51020 | 555.52266 | [M+Na]+    | 2.906 |
| C25H34O14  | 1 | 579.16730 | 558.19486 | [M-2H+Na]- | 3.835 |
| C31H63O7P  | 1 | 579.43910 | 578.43114 | [M+H]+     | 1.184 |
| C36H66O5   | 1 | 579.49920 | 578.49103 | [M+H]+     | 1.560 |
| C38H68O2   | 1 | 579.50830 | 556.52193 | [M+Na]+    | 4.921 |
| C28H50NO7P | 1 | 580.27910 | 543.33249 | [M-2H+K]-  | 3.433 |
| C28H48NO8P | 1 | 580.30060 | 557.31176 | [M+Na]+    | 0.651 |
| C25H34O14  | 1 | 581.18570 | 558.19486 | [M+Na]+    | 2.784 |
| C41H56O2   | 1 | 581.43250 | 580.42803 | [M+H]+     | 4.817 |
| C36H62O3   | 1 | 581.43250 | 542.46990 | [M+K]+     | 0.939 |
| C36H64O4   | 2 | 581.45740 | 560.48046 | [M-2H+Na]- | 3.919 |
| C26H42NO9P | 1 | 582.22390 | 543.25972 | [M+K]+     | 1.766 |
| C28H56NO9P | 1 | 582.37590 | 581.36927 | [M+H]+     | 1.102 |
| C23H45O12P | 2 | 583.22690 | 544.26487 | [M+K]+     | 1.917 |
| C26H47O12P | 1 | 583.28960 | 582.28052 | [M+H]+     | 3.107 |
| C36H54O6   | 1 | 583.39690 | 582.39204 | [M+H]+     | 4.133 |
| C40H54O3   | 3 | 583.41230 | 582.40730 | [M+H]+     | 3.884 |
| C35H62O5   | 1 | 583.43670 | 562.45973 | [M-2H+Na]- | 3.966 |
| C41H58O2   | 1 | 583.45070 | 582.44368 | [M+H]+     | 0.430 |
| C26H44NO9P | 1 | 584.23900 | 545.27537 | [M+K]+     | 0.818 |
| C28H52NO7P | 1 | 584.31300 | 545.34814 | [M+K]+     | 2.923 |
| C35H63NO4  | 1 | 584.46420 | 561.47571 | [M+Na]+    | 1.251 |
| C27H53O11P | 1 | 585.33950 | 584.33255 | [M+H]+     | 0.554 |
| C40H50O2   | 1 | 585.37260 | 562.38108 | [M+Na]+    | 3.926 |
| C38H58O2   | 1 | 585.40860 | 546.44368 | [M+K]+     | 3.022 |
| C41H60O2   | 1 | 585.46420 | 584.45933 | [M+H]+     | 4.101 |
| C38H74O2   | 3 | 585.56070 | 562.56888 | [M+Na]+    | 4.437 |
| C28H54NO8P | 2 | 586.34880 | 563.35871 | [M+Na]+    | 1.487 |
| C28H53O9P  | 2 | 587.33360 | 564.34272 | [M+Na]+    | 2.820 |
| C27H55O11P | 1 | 587.35280 | 586.34820 | [M+H]+     | 4.553 |
| C40H52O    | 1 | 587.36670 | 548.40182 | [M+K]+     | 2.952 |
| C29H57O8P  | 1 | 587.36670 | 564.37911 | [M+Na]+    | 2.775 |
| C40H58O3   | 1 | 587.44480 | 586.43860 | [M+H]+     | 1.815 |
| C35H64O5   | 1 | 587.46560 | 564.47538 | [M+Na]+    | 1.707 |
| C40H68     | 1 | 587.49690 | 548.53210 | [M+K]+     | 2.807 |
| C38H76O2   | 2 | 587.57180 | 564.58453 | [M+Na]+    | 3.322 |
| C28H56NO8P | 1 | 588.36430 | 565.37436 | [M+Na]+    | 1.227 |
| C29H60NO7P | 1 | 588.40260 | 565.41074 | [M+Na]+    | 4.482 |
| C34H52O8   | 1 | 589.37520 | 588.36622 | [M+H]+     | 2.900 |

|              |   |           |           |                     |       |
|--------------|---|-----------|-----------|---------------------|-------|
| C31H57O8P    | 1 | 589.38720 | 588.37911 | [M+H] <sup>+</sup>  | 1.393 |
| C37H64O5     | 6 | 589.48100 | 588.47538 | [M+H] <sup>+</sup>  | 2.792 |
| C35H66O5     | 6 | 589.48100 | 566.49103 | [M+Na] <sup>+</sup> | 1.277 |
| C37H74O2     | 1 | 589.53060 | 550.56888 | [M+K] <sup>+</sup>  | 2.427 |
| C30H47O10    | 2 | 590.30880 | 567.31693 | [M+Na] <sup>+</sup> | 4.494 |
| C26H50NO10P  | 2 | 590.30880 | 567.31724 | [M+Na] <sup>+</sup> | 3.967 |
| C27H54NO9P   | 2 | 590.34070 | 567.35362 | [M+Na] <sup>+</sup> | 3.630 |
| C28H58NO7P   | 1 | 590.35550 | 551.39509 | [M+K] <sup>+</sup>  | 4.645 |
| C28H44N2O8S  | 1 | 591.27120 | 568.28184 | [M+Na] <sup>+</sup> | 0.233 |
| C30H48O10    | 1 | 591.31460 | 568.32475 | [M+Na] <sup>+</sup> | 1.062 |
| C31H59O8P    | 2 | 591.40360 | 590.39476 | [M+H] <sup>+</sup>  | 2.656 |
| C35H68O5     | 3 | 591.49850 | 568.50668 | [M+Na] <sup>+</sup> | 4.401 |
| C37H66O5     | 5 | 591.49850 | 590.49103 | [M+H] <sup>+</sup>  | 0.345 |
| C40H72       | 1 | 591.52860 | 552.56340 | [M+K] <sup>+</sup>  | 3.464 |
| C40H78O2     | 1 | 591.60860 | 590.60018 | [M+H] <sup>+</sup>  | 1.942 |
| C26H52NO9P   | 2 | 592.29890 | 553.33797 | [M+K] <sup>+</sup>  | 3.751 |
| C30H58NO8P   | 3 | 592.39890 | 591.39001 | [M+H] <sup>+</sup>  | 2.740 |
| C35H71NO3    | 1 | 592.50600 | 553.54340 | [M+K] <sup>+</sup>  | 0.920 |
| C35H71NO4    | 1 | 592.52840 | 569.53831 | [M+Na] <sup>+</sup> | 1.467 |
| C25H47O12P   | 1 | 593.26880 | 570.28052 | [M+Na] <sup>+</sup> | 1.583 |
| C27H45O12P   | 1 | 593.27290 | 592.26487 | [M+H] <sup>+</sup>  | 1.284 |
| C40H48O4     | 1 | 593.36320 | 592.35526 | [M+H] <sup>+</sup>  | 1.127 |
| C33H52O9     | 1 | 593.36600 | 592.36114 | [M+H] <sup>+</sup>  | 4.055 |
| C34H56O8     | 2 | 593.40380 | 592.39752 | [M+H] <sup>+</sup>  | 1.670 |
| C33H62O6     | 1 | 593.41600 | 554.45464 | [M+K] <sup>+</sup>  | 3.018 |
| C31H61O8P    | 1 | 593.41600 | 592.41041 | [M+H] <sup>+</sup>  | 2.829 |
| C32H65O7P    | 1 | 593.45510 | 592.44679 | [M+H] <sup>+</sup>  | 1.746 |
| C37H68O5     | 3 | 593.51480 | 592.50668 | [M+H] <sup>+</sup>  | 1.439 |
| C40H74       | 2 | 593.54030 | 554.57905 | [M+K] <sup>+</sup>  | 3.203 |
| C40H80O2     | 1 | 593.62480 | 592.61583 | [M+H] <sup>+</sup>  | 2.862 |
| C29H56NO9P   | 1 | 594.37800 | 593.36927 | [M+H] <sup>+</sup>  | 2.453 |
| C32H68NO6P   | 1 | 594.48420 | 593.47843 | [M+H] <sup>+</sup>  | 2.518 |
| C25H32O14    | 1 | 595.13970 | 556.17921 | [M+K] <sup>+</sup>  | 4.471 |
| C27H37ClO10  | 1 | 595.17000 | 556.20753 | [M+K] <sup>+</sup>  | 1.141 |
| C24H45O12P   | 1 | 595.23080 | 556.26487 | [M+K] <sup>+</sup>  | 4.674 |
| C25H49O11P   | 1 | 595.26650 | 556.30125 | [M+K] <sup>+</sup>  | 3.523 |
| C32H44O8     | 1 | 595.26650 | 556.30362 | [M+K] <sup>+</sup>  | 0.455 |
| C25H49O12P   | 1 | 595.28760 | 572.29617 | [M+Na] <sup>+</sup> | 3.714 |
| C27H47O12P   | 1 | 595.28760 | 594.28052 | [M+H] <sup>+</sup>  | 0.316 |
| C30H53O8P    | 2 | 595.33850 | 572.34781 | [M+Na] <sup>+</sup> | 2.471 |
| C26H45NO10S2 | 2 | 596.25550 | 595.24850 | [M+H] <sup>+</sup>  | 0.444 |
| C28H48NO8P   | 1 | 596.27200 | 557.31176 | [M+K] <sup>+</sup>  | 4.875 |
| C29H52NO7P   | 2 | 596.31020 | 557.34814 | [M+K] <sup>+</sup>  | 1.831 |
| C33H57NO8    | 2 | 596.41570 | 595.40842 | [M+H] <sup>+</sup>  | 0.017 |
| C27H39ClO10  | 1 | 597.18460 | 558.22318 | [M+K] <sup>+</sup>  | 2.895 |
| C32H46O8     | 1 | 597.28310 | 558.31927 | [M+K] <sup>+</sup>  | 1.137 |
| C37H72O5     | 1 | 597.54460 | 596.53798 | [M+H] <sup>+</sup>  | 1.081 |
| C41H72O2     | 1 | 597.55770 | 596.55323 | [M+H] <sup>+</sup>  | 4.687 |
| C27H44O11S   | 1 | 599.25200 | 576.26044 | [M+Na] <sup>+</sup> | 3.907 |
| C27H51O12P   | 1 | 599.31870 | 598.31182 | [M+H] <sup>+</sup>  | 0.647 |
| C30H57O8P    | 1 | 599.36710 | 576.37911 | [M+Na] <sup>+</sup> | 2.052 |
| C32H54O10    | 2 | 599.37780 | 598.37170 | [M+H] <sup>+</sup>  | 1.954 |
| C40H54O4     | 1 | 599.40920 | 598.40221 | [M+H] <sup>+</sup>  | 0.469 |

|               |   |           |           |         |       |
|---------------|---|-----------|-----------|---------|-------|
| C35H60O6      | 1 | 599.42890 | 576.43899 | [M+Na]+ | 1.148 |
| C42H62O2      | 1 | 599.48350 | 598.47498 | [M+H]+  | 2.083 |
| C29H56NO8P    | 3 | 600.36650 | 577.37436 | [M+Na]+ | 4.867 |
| C30H60NO6P    | 1 | 600.38060 | 561.41583 | [M+K]+  | 2.703 |
| C30H60NO7P    | 1 | 600.40150 | 577.41074 | [M+Na]+ | 2.560 |
| C35H63NO4     | 2 | 600.43740 | 561.47571 | [M+K]+  | 2.432 |
| C36H67NO3     | 2 | 600.47350 | 561.51210 | [M+K]+  | 2.906 |
| C29H41ClO11   | 1 | 601.24300 | 600.23374 | [M+H]+  | 3.303 |
| C29H55O8P     | 2 | 601.32640 | 562.36346 | [M+K]+  | 0.348 |
| C40H50O3      | 2 | 601.36460 | 578.37600 | [M+Na]+ | 1.026 |
| C40H56O4      | 1 | 601.42390 | 600.41786 | [M+H]+  | 2.047 |
| C41H60O3      | 1 | 601.46000 | 600.45425 | [M+H]+  | 2.521 |
| C39H78O2      | 2 | 601.59160 | 578.60018 | [M+Na]+ | 3.654 |
| C26H45NO9S2   | 1 | 602.24050 | 579.25358 | [M+Na]+ | 3.821 |
| C28H54NO9P    | 1 | 602.34510 | 579.35362 | [M+Na]+ | 3.747 |
| C30H62NO7P    | 1 | 602.41780 | 579.42639 | [M+Na]+ | 3.630 |
| C37H73NO3     | 1 | 602.54540 | 579.55905 | [M+Na]+ | 4.756 |
| C29H57O8P     | 1 | 603.34480 | 564.37911 | [M+K]+  | 4.212 |
| C41H56O2      | 1 | 603.41650 | 580.42803 | [M+Na]+ | 1.246 |
| C38H66O5      | 5 | 603.49670 | 602.49103 | [M+H]+  | 2.645 |
| C36H68O5      | 4 | 603.49670 | 580.50668 | [M+Na]+ | 1.331 |
| C37H72O4      | 1 | 603.53480 | 580.54306 | [M+Na]+ | 4.172 |
| C39H70O4      | 6 | 603.53580 | 602.52741 | [M+H]+  | 1.854 |
| C38H76O2      | 1 | 603.54620 | 564.58453 | [M+K]+  | 2.454 |
| C36H71NO3     | 1 | 604.50790 | 565.54340 | [M+K]+  | 2.241 |
| C32H44O11     | 1 | 605.29570 | 604.28837 | [M+H]+  | 0.106 |
| C41H58O       | 1 | 605.41050 | 566.44877 | [M+K]+  | 2.339 |
| C32H61O8P     | 1 | 605.41540 | 604.41041 | [M+H]+  | 3.764 |
| C41H58O2      | 1 | 605.43030 | 582.44368 | [M+Na]+ | 4.298 |
| C33H65O7P     | 2 | 605.45490 | 604.44679 | [M+H]+  | 1.381 |
| C37H74O3      | 1 | 605.52590 | 566.56380 | [M+K]+  | 1.727 |
| C17H27N3O17P2 | 1 | 606.07570 | 607.08158 | [M-H]-  | 2.298 |
| C25H48N2O8PS  | 1 | 606.25160 | 567.28680 | [M+K]+  | 2.722 |
| C25H48N2O9PS  | 1 | 606.27020 | 583.28190 | [M+Na]+ | 1.519 |
| C30H50NO7P    | 1 | 606.29430 | 567.33249 | [M+K]+  | 2.213 |
| C27H54NO9P    | 1 | 606.31410 | 567.35362 | [M+K]+  | 4.407 |
| C31H60NO8P    | 1 | 606.41350 | 605.40566 | [M+H]+  | 0.945 |
| C34H48O7      | 1 | 607.30250 | 568.34001 | [M+K]+  | 1.080 |
| C32H44F6O4    | 1 | 607.32330 | 606.31438 | [M+H]+  | 2.714 |
| C27H53O11P    | 1 | 607.32330 | 584.33255 | [M+Na]+ | 2.511 |
| C40H56O2      | 5 | 607.39180 | 568.42803 | [M+K]+  | 1.019 |
| C40H56O3      | 2 | 607.41240 | 584.42295 | [M+Na]+ | 0.384 |
| C41H60O       | 1 | 607.42900 | 568.46442 | [M+K]+  | 2.361 |
| C33H67O7P     | 1 | 607.47230 | 606.46244 | [M+H]+  | 4.257 |
| C35H68O5      | 1 | 607.47230 | 568.50668 | [M+K]+  | 4.073 |
| C28H44NO9P    | 1 | 608.24140 | 569.27537 | [M+K]+  | 4.732 |
| C35H71NO4     | 1 | 608.50030 | 569.53831 | [M+K]+  | 1.906 |
| C25H47O12P    | 1 | 609.24380 | 570.28052 | [M+K]+  | 0.217 |
| C34H56O9      | 2 | 609.39740 | 608.39244 | [M+H]+  | 3.784 |
| C40H58O2      | 1 | 609.40910 | 570.44368 | [M+K]+  | 3.723 |
| C40H58O3      | 1 | 609.42760 | 586.43860 | [M+Na]+ | 0.356 |
| C41H62O2      | 1 | 609.46610 | 586.47498 | [M+Na]+ | 3.114 |
| C38H72O5      | 1 | 609.54790 | 608.53798 | [M+H]+  | 4.354 |

|              |   |           |           |         |       |
|--------------|---|-----------|-----------|---------|-------|
| C25H49O12P   | 1 | 611.25890 | 572.29617 | [M+K]+  | 0.684 |
| C34H52O7     | 1 | 611.33350 | 572.37131 | [M+K]+  | 1.564 |
| C39H72O3     | 1 | 611.53440 | 588.54815 | [M+Na]+ | 4.852 |
| C38H74O5     | 1 | 611.56130 | 610.55363 | [M+H]+  | 0.661 |
| C29H57O11P   | 4 | 613.36880 | 612.36385 | [M+H]+  | 3.789 |
| C35H58O6     | 1 | 613.38470 | 574.42334 | [M+K]+  | 2.920 |
| C40H52O5     | 1 | 613.38700 | 612.38148 | [M+H]+  | 2.846 |
| C33H57O8P    | 2 | 613.38700 | 612.37911 | [M+H]+  | 1.012 |
| C33H56O10    | 2 | 613.39370 | 612.38735 | [M+H]+  | 1.501 |
| C32H62O8     | 1 | 613.40980 | 574.44447 | [M+K]+  | 3.552 |
| C40H62O2     | 1 | 613.44000 | 574.47498 | [M+K]+  | 3.047 |
| C39H64O5     | 1 | 613.48210 | 612.47538 | [M+H]+  | 0.890 |
| C40H78O2     | 2 | 613.58720 | 590.60018 | [M+Na]+ | 3.589 |
| C30H58NO8P   | 1 | 614.38050 | 591.39001 | [M+Na]+ | 2.070 |
| C40H48O4     | 1 | 615.34560 | 592.35526 | [M+Na]+ | 1.817 |
| C32H54O11    | 1 | 615.37250 | 614.36662 | [M+H]+  | 2.252 |
| C31H61O8P    | 1 | 615.40010 | 592.41041 | [M+Na]+ | 0.764 |
| C40H54O5     | 1 | 615.40300 | 614.39713 | [M+H]+  | 2.268 |
| C33H59O8P    | 2 | 615.40300 | 614.39476 | [M+H]+  | 1.578 |
| C33H58O10    | 1 | 615.41000 | 614.40300 | [M+H]+  | 0.440 |
| C32H64O8     | 2 | 615.42400 | 576.46012 | [M+K]+  | 1.185 |
| C39H66O5     | 4 | 615.49650 | 614.49103 | [M+H]+  | 2.918 |
| C37H68O5     | 2 | 615.49650 | 592.50668 | [M+Na]+ | 0.980 |
| C39H76O2     | 2 | 615.55010 | 576.58453 | [M+K]+  | 3.930 |
| C40H80O2     | 3 | 615.60210 | 592.61583 | [M+Na]+ | 4.795 |
| C28H52NO9P   | 1 | 616.30370 | 577.33797 | [M+K]+  | 4.183 |
| C29H56NO9P   | 1 | 616.35580 | 593.36927 | [M+Na]+ | 4.369 |
| C30H60NO8P   | 2 | 616.39670 | 593.40566 | [M+Na]+ | 2.956 |
| C27H47O12P   | 1 | 617.27100 | 594.28052 | [M+Na]+ | 2.043 |
| C33H54O8     | 1 | 617.34240 | 578.38187 | [M+K]+  | 4.246 |
| C40H50O4     | 2 | 617.36180 | 594.37091 | [M+Na]+ | 2.702 |
| C39H68O5     | 5 | 617.51240 | 616.50668 | [M+H]+  | 2.504 |
| C37H70O5     | 5 | 617.51240 | 594.52233 | [M+Na]+ | 1.381 |
| C40H72O4     | 1 | 617.55210 | 616.54306 | [M+H]+  | 2.865 |
| C39H78O3     | 1 | 617.58130 | 594.59510 | [M+Na]+ | 4.885 |
| C40H82O2     | 2 | 617.61990 | 594.63148 | [M+Na]+ | 1.299 |
| C26H45NO9S2  | 2 | 618.21390 | 579.25358 | [M+K]+  | 4.578 |
| C26H45NO10S2 | 1 | 618.23670 | 595.24850 | [M+Na]+ | 1.643 |
| C30H62NO7P   | 1 | 618.39160 | 579.42639 | [M+K]+  | 3.328 |
| C35H54O9     | 1 | 619.38630 | 618.37679 | [M+H]+  | 3.623 |
| C33H65O8P    | 1 | 619.43420 | 620.44171 | [M-H]-  | 0.386 |
| C42H60O2     | 1 | 619.45070 | 596.45933 | [M+Na]+ | 3.468 |
| C34H67O7P    | 2 | 619.47060 | 618.46244 | [M+H]+  | 1.430 |
| C42H82O2     | 1 | 619.63630 | 618.63148 | [M+H]+  | 3.956 |
| C32H62NO8P   | 1 | 620.42920 | 619.42131 | [M+H]+  | 1.004 |
| C34H70NO6P   | 1 | 620.49900 | 619.49408 | [M+H]+  | 3.782 |
| C29H49O12P   | 1 | 621.30220 | 620.29617 | [M+H]+  | 1.993 |
| C27H51O12P   | 1 | 621.30220 | 598.31182 | [M+Na]+ | 1.869 |
| C40H54O3     | 1 | 621.37350 | 582.40730 | [M+K]+  | 4.915 |
| C42H62O2     | 1 | 621.46530 | 598.47498 | [M+Na]+ | 1.767 |
| C34H69O7P    | 1 | 621.48800 | 620.47809 | [M+H]+  | 4.241 |
| C36H70O5     | 1 | 621.48800 | 582.52233 | [M+K]+  | 4.061 |
| C41H64O4     | 1 | 621.48800 | 620.48046 | [M+H]+  | 0.433 |

|               |   |           |           |                        |       |
|---------------|---|-----------|-----------|------------------------|-------|
| C34H68O9      | 1 | 621.49310 | 620.48634 | [M+H] <sup>+</sup>     | 0.814 |
| C35H73O6P     | 1 | 621.51900 | 620.51448 | [M+H] <sup>+</sup>     | 4.423 |
| C27H36O15     | 2 | 623.19300 | 600.20543 | [M+Na] <sup>+</sup>    | 2.643 |
| C29H51O12P    | 2 | 623.32180 | 622.31182 | [M+H] <sup>+</sup>     | 4.351 |
| C41H60O2      | 1 | 623.42490 | 584.45933 | [M+K] <sup>+</sup>     | 3.880 |
| C41H60O3      | 1 | 623.44550 | 600.45425 | [M+Na] <sup>+</sup>    | 3.261 |
| C43H74O2      | 1 | 623.57550 | 622.56888 | [M+H] <sup>+</sup>     | 1.044 |
| C30H58NO10P   | 2 | 624.38720 | 623.37984 | [M+H] <sup>+</sup>     | 0.149 |
| C29H47O10P    | 1 | 625.25570 | 586.29069 | [M+K] <sup>+</sup>     | 2.978 |
| C30H52O7P2    | 1 | 625.28020 | 586.31883 | [M+K] <sup>+</sup>     | 2.848 |
| C31H55O9P     | 1 | 625.34460 | 602.35837 | [M+Na] <sup>+</sup>    | 4.789 |
| C33H52O11     | 1 | 625.35760 | 624.35097 | [M+H] <sup>+</sup>     | 1.017 |
| C32H59O8P     | 1 | 625.38140 | 602.39476 | [M+Na] <sup>+</sup>    | 4.125 |
| C31H61O10P    | 1 | 625.40450 | 624.40024 | [M+H] <sup>+</sup>     | 4.811 |
| C40H58O3      | 1 | 625.40450 | 586.43860 | [M+K] <sup>+</sup>     | 4.404 |
| C42H56O4      | 1 | 625.42680 | 624.41786 | [M+H] <sup>+</sup>     | 2.669 |
| C41H62O2      | 1 | 625.44090 | 586.47498 | [M+K] <sup>+</sup>     | 4.427 |
| C34H66O8      | 1 | 625.46710 | 602.47577 | [M+Na] <sup>+</sup>    | 3.370 |
| C30H47N3O9S   | 1 | 626.31350 | 625.30331 | [M+H] <sup>+</sup>     | 4.670 |
| C31H57O8P     | 1 | 627.34330 | 588.37911 | [M+K] <sup>+</sup>     | 1.659 |
| C29H55O12P    | 2 | 627.34960 | 626.34312 | [M+H] <sup>+</sup>     | 1.258 |
| C33H65O7P     | 2 | 627.43370 | 604.44679 | [M+Na] <sup>+</sup>    | 3.690 |
| C34H68O8      | 2 | 627.48060 | 604.49142 | [M+Na] <sup>+</sup>    | 0.067 |
| C38H68O5      | 1 | 627.49800 | 604.50668 | [M+Na] <sup>+</sup>    | 3.351 |
| C40H66O5      | 1 | 627.49800 | 626.49103 | [M+H] <sup>+</sup>     | 0.472 |
| C41H80O2      | 1 | 627.60230 | 604.61583 | [M+Na] <sup>+</sup>    | 4.385 |
| C17H27N3O17P2 | 1 | 628.05310 | 607.08158 | [M-2H+Na] <sup>-</sup> | 4.995 |
| C31H60NO8P    | 1 | 628.39480 | 605.40566 | [M+Na] <sup>+</sup>    | 0.124 |
| C33H50O10     | 1 | 629.32930 | 606.34040 | [M+Na] <sup>+</sup>    | 0.512 |
| C32H63O8P     | 2 | 629.41290 | 606.42606 | [M+Na] <sup>+</sup>    | 3.781 |
| C33H67O7P     | 1 | 629.45470 | 606.46244 | [M+Na] <sup>+</sup>    | 4.822 |
| C38H70O5      | 1 | 629.51370 | 606.52233 | [M+Na] <sup>+</sup>    | 3.420 |
| C40H68O5      | 1 | 629.51370 | 628.50668 | [M+H] <sup>+</sup>     | 0.391 |
| C30H58NO8P    | 1 | 630.35080 | 591.39001 | [M+K] <sup>+</sup>     | 3.739 |
| C31H62NO8P    | 2 | 630.41160 | 607.42131 | [M+Na] <sup>+</sup>    | 1.700 |
| C32H66NO7P    | 1 | 630.44790 | 607.45769 | [M+Na] <sup>+</sup>    | 1.566 |
| C33H52O9      | 1 | 631.32360 | 592.36114 | [M+K] <sup>+</sup>     | 1.087 |
| C34H56O9      | 1 | 631.37890 | 608.39244 | [M+Na] <sup>+</sup>    | 4.367 |
| C33H58O11     | 1 | 631.40490 | 630.39792 | [M+H] <sup>+</sup>     | 0.453 |
| C34H63O8P     | 1 | 631.43070 | 630.42606 | [M+H] <sup>+</sup>     | 4.164 |
| C34H65O8P     | 1 | 631.43520 | 632.44171 | [M-H] <sup>-</sup>     | 1.205 |
| C38H72O5      | 1 | 631.52600 | 608.53798 | [M+Na] <sup>+</sup>    | 1.895 |
| C40H80O3      | 3 | 631.59850 | 608.61075 | [M+Na] <sup>+</sup>    | 2.323 |
| C29H56NO10P   | 1 | 632.35280 | 609.36419 | [M+Na] <sup>+</sup>    | 0.961 |
| C38H75NO3     | 1 | 632.53710 | 593.57470 | [M+K] <sup>+</sup>     | 1.178 |
| C30H59O10P    | 1 | 633.37420 | 610.38459 | [M+Na] <sup>+</sup>    | 0.616 |
| C36H56O9      | 2 | 633.40150 | 632.39244 | [M+H] <sup>+</sup>     | 2.832 |
| C42H58O3      | 2 | 633.42690 | 610.43860 | [M+Na] <sup>+</sup>    | 1.448 |
| C37H64N2O6    | 4 | 633.48610 | 632.47644 | [M+H] <sup>+</sup>     | 3.774 |
| C35H69O7P     | 4 | 633.48610 | 632.47809 | [M+H] <sup>+</sup>     | 1.162 |
| C41H70O2      | 1 | 633.50030 | 594.53758 | [M+K] <sup>+</sup>     | 0.680 |
| C39H78O3      | 1 | 633.55650 | 594.59510 | [M+K] <sup>+</sup>     | 2.756 |
| C42H74O2      | 1 | 633.55650 | 610.56888 | [M+Na] <sup>+</sup>    | 2.529 |

|              |   |           |           |                     |       |
|--------------|---|-----------|-----------|---------------------|-------|
| C33H64NO8P   | 1 | 634.44450 | 633.43696 | [M+H] <sup>+</sup>  | 0.430 |
| C33H66NO8P   | 1 | 634.44510 | 635.45261 | [M-H] <sup>-</sup>  | 0.374 |
| C27H49O12P   | 1 | 635.25750 | 596.29617 | [M+K] <sup>+</sup>  | 2.862 |
| C28H53O12P   | 1 | 635.31830 | 612.32747 | [M+Na] <sup>+</sup> | 2.534 |
| C39H48O6     | 1 | 635.33400 | 612.34509 | [M+Na] <sup>+</sup> | 0.491 |
| C41H56O3     | 1 | 635.38410 | 596.42295 | [M+K] <sup>+</sup>  | 3.141 |
| C39H64O5     | 1 | 635.46680 | 612.47538 | [M+Na] <sup>+</sup> | 3.467 |
| C34H67O8P    | 1 | 635.46680 | 634.45736 | [M+H] <sup>+</sup>  | 3.416 |
| C43H70O3     | 1 | 635.54190 | 634.53250 | [M+H] <sup>+</sup>  | 3.358 |
| C43H86O2     | 1 | 635.67250 | 634.66278 | [M+H] <sup>+</sup>  | 3.853 |
| C33H66NO8P   | 3 | 636.46060 | 635.45261 | [M+H] <sup>+</sup>  | 1.136 |
| C35H74NO6P   | 1 | 636.53280 | 635.52538 | [M+H] <sup>+</sup>  | 0.239 |
| C41H81NO3    | 1 | 636.62840 | 635.62165 | [M+H] <sup>+</sup>  | 0.809 |
| C29H39ClO11  | 1 | 637.17960 | 598.21809 | [M+K] <sup>+</sup>  | 2.580 |
| C32H54O11    | 1 | 637.35740 | 614.36662 | [M+Na] <sup>+</sup> | 2.452 |
| C29H59O11P   | 1 | 637.36600 | 614.37950 | [M+Na] <sup>+</sup> | 4.275 |
| C33H59O8P    | 1 | 637.38200 | 614.39476 | [M+Na] <sup>+</sup> | 3.106 |
| C42H84O3     | 1 | 637.64900 | 636.64205 | [M+H] <sup>+</sup>  | 0.496 |
| C29H41ClO11  | 1 | 639.19860 | 600.23374 | [M+K] <sup>+</sup>  | 2.669 |
| C40H56O4     | 1 | 639.37850 | 600.41786 | [M+K] <sup>+</sup>  | 3.927 |
| C36H56O8     | 2 | 639.38940 | 616.39752 | [M+Na] <sup>+</sup> | 4.157 |
| C33H61O8P    | 4 | 639.40240 | 616.41041 | [M+Na] <sup>+</sup> | 4.332 |
| C40H56O5     | 4 | 639.40240 | 616.41278 | [M+Na] <sup>+</sup> | 0.630 |
| C35H59O8P    | 4 | 639.40240 | 638.39476 | [M+H] <sup>+</sup>  | 0.580 |
| C41H60O3     | 1 | 639.41740 | 600.45425 | [M+K] <sup>+</sup>  | 0.006 |
| C32H63O10P   | 1 | 639.42220 | 638.41589 | [M+H] <sup>+</sup>  | 1.500 |
| C42H64O2     | 2 | 639.45680 | 600.49063 | [M+K] <sup>+</sup>  | 4.721 |
| C39H74O6     | 1 | 639.55870 | 638.54854 | [M+H] <sup>+</sup>  | 4.517 |
| C34H67NO5S   | 1 | 640.43690 | 601.47400 | [M+K] <sup>+</sup>  | 0.386 |
| C34H68NO6P   | 2 | 640.46880 | 617.47843 | [M+Na] <sup>+</sup> | 1.799 |
| C29H47O12P   | 1 | 641.26670 | 618.28052 | [M+Na] <sup>+</sup> | 4.739 |
| C31H55O9P    | 1 | 641.32360 | 602.35837 | [M+K] <sup>+</sup>  | 3.237 |
| C32H59O8P    | 1 | 641.36050 | 602.39476 | [M+K] <sup>+</sup>  | 4.040 |
| C33H63O7P    | 1 | 641.39450 | 602.43114 | [M+K] <sup>+</sup>  | 0.321 |
| C33H63O8P    | 5 | 641.41410 | 618.42606 | [M+Na] <sup>+</sup> | 1.840 |
| C35H61O8P    | 4 | 641.41520 | 640.41041 | [M+H] <sup>+</sup>  | 3.865 |
| C34H66O9     | 1 | 641.46100 | 618.47069 | [M+Na] <sup>+</sup> | 1.704 |
| C42H82O2     | 2 | 641.61760 | 618.63148 | [M+Na] <sup>+</sup> | 4.835 |
| C30H47N3O10S | 1 | 642.30700 | 641.29822 | [M+H] <sup>+</sup>  | 2.351 |
| C32H62NO8P   | 1 | 642.41170 | 619.42131 | [M+Na] <sup>+</sup> | 1.824 |
| C29H49O12P   | 1 | 643.28510 | 620.29617 | [M+Na] <sup>+</sup> | 0.449 |
| C32H61O8P    | 1 | 643.37130 | 604.41041 | [M+K] <sup>+</sup>  | 3.511 |
| C35H63O8P    | 5 | 643.43210 | 642.42606 | [M+H] <sup>+</sup>  | 1.910 |
| C33H65O8P    | 5 | 643.43210 | 620.44171 | [M+Na] <sup>+</sup> | 1.818 |
| C41H64O4     | 1 | 643.47130 | 620.48046 | [M+Na] <sup>+</sup> | 2.514 |
| C36H67O7P    | 2 | 643.47130 | 642.46244 | [M+H] <sup>+</sup>  | 2.465 |
| C38H68O5     | 2 | 643.47130 | 604.50668 | [M+K] <sup>+</sup>  | 2.291 |
| C41H70O5     | 2 | 643.52750 | 642.52233 | [M+H] <sup>+</sup>  | 3.257 |
| C39H72O5     | 2 | 643.52750 | 620.53798 | [M+Na] <sup>+</sup> | 0.471 |
| C43H72O2     | 1 | 643.54350 | 620.55323 | [M+Na] <sup>+</sup> | 1.628 |
| C31H60NO8P   | 1 | 644.37040 | 605.40566 | [M+K] <sup>+</sup>  | 2.472 |
| C32H64NO8P   | 3 | 644.42580 | 621.43696 | [M+Na] <sup>+</sup> | 0.587 |
| C33H68NO7P   | 2 | 644.46400 | 621.47334 | [M+Na] <sup>+</sup> | 2.230 |

|               |   |           |           |                        |       |
|---------------|---|-----------|-----------|------------------------|-------|
| C36H69NO8     | 2 | 644.50710 | 643.50232 | [M+H] <sup>+</sup>     | 3.863 |
| C39H75NO3     | 1 | 644.54080 | 605.57470 | [M+K] <sup>+</sup>     | 4.585 |
| C40H79NO3     | 1 | 644.59290 | 621.60600 | [M+Na] <sup>+</sup>    | 3.593 |
| C32H44F6O4    | 1 | 645.27740 | 606.31438 | [M+K] <sup>+</sup>     | 0.205 |
| C33H50O10     | 1 | 645.30200 | 606.34040 | [M+K] <sup>+</sup>     | 2.404 |
| C31H49O12P    | 1 | 645.30200 | 644.29617 | [M+H] <sup>+</sup>     | 2.228 |
| C40H64O5      | 3 | 645.45020 | 624.47538 | [M-2H+Na] <sup>-</sup> | 0.254 |
| C35H67O8P     | 3 | 645.45020 | 646.45736 | [M-H] <sup>-</sup>     | 0.172 |
| C41H66O3      | 3 | 645.46420 | 606.50120 | [M+K] <sup>+</sup>     | 0.226 |
| C36H73N2O5P   | 1 | 645.53180 | 644.52571 | [M+H] <sup>+</sup>     | 1.829 |
| C17H27N3O17P2 | 2 | 646.04730 | 607.08158 | [M+K] <sup>+</sup>     | 3.983 |
| C30H58NO10P   | 2 | 646.37060 | 623.37984 | [M+Na] <sup>+</sup>    | 2.386 |
| C34H64NO8P    | 1 | 646.44610 | 645.43696 | [M+H] <sup>+</sup>     | 2.897 |
| C29H53O12P    | 1 | 647.31600 | 624.32747 | [M+Na] <sup>+</sup>    | 1.066 |
| C31H61O10P    | 2 | 647.39260 | 624.40024 | [M+Na] <sup>+</sup>    | 4.850 |
| C40H66O5      | 2 | 647.46580 | 626.49103 | [M-2H+Na] <sup>-</sup> | 0.176 |
| C35H69O8P     | 1 | 647.46580 | 648.47301 | [M-H] <sup>-</sup>     | 0.094 |
| C39H76O5      | 1 | 647.56080 | 624.56928 | [M+Na] <sup>+</sup>    | 3.556 |
| C41H74O5      | 1 | 647.56080 | 646.55363 | [M+H] <sup>+</sup>     | 0.148 |
| C45H74O2      | 1 | 647.57770 | 646.56888 | [M+H] <sup>+</sup>     | 2.392 |
| C43H82O3      | 1 | 647.63430 | 646.62640 | [M+H] <sup>+</sup>     | 0.979 |
| C35H70NO7P    | 1 | 648.49840 | 647.48899 | [M+H] <sup>+</sup>     | 3.297 |
| C42H81NO3     | 1 | 648.63210 | 647.62165 | [M+H] <sup>+</sup>     | 4.910 |
| C31H53O12P    | 2 | 649.33340 | 648.32747 | [M+H] <sup>+</sup>     | 2.062 |
| C29H55O12P    | 1 | 649.33340 | 626.34312 | [M+Na] <sup>+</sup>    | 1.632 |
| C33H54O11     | 1 | 649.35840 | 626.36662 | [M+Na] <sup>+</sup>    | 3.947 |
| C42H58O3      | 1 | 649.40390 | 610.43860 | [M+K] <sup>+</sup>     | 3.317 |
| C36H73O7P     | 1 | 649.51490 | 648.50939 | [M+H] <sup>+</sup>     | 2.716 |
| C42H74O2      | 1 | 649.53170 | 610.56888 | [M+K] <sup>+</sup>     | 0.510 |
| C33H64NO9P    | 1 | 650.43950 | 649.43187 | [M+H] <sup>+</sup>     | 0.550 |
| C34H68NO8P    | 1 | 650.47860 | 649.46826 | [M+H] <sup>+</sup>     | 4.724 |
| C27H48O11S2   | 1 | 651.22590 | 612.26381 | [M+K] <sup>+</sup>     | 1.629 |
| C32H58O13     | 3 | 651.39360 | 650.38775 | [M+H] <sup>+</sup>     | 2.174 |
| C34H61O8P     | 1 | 651.40240 | 628.41041 | [M+Na] <sup>+</sup>    | 4.252 |
| C39H64O5      | 1 | 651.43620 | 612.47538 | [M+K] <sup>+</sup>     | 3.571 |
| C42H66O5      | 1 | 651.49710 | 650.49103 | [M+H] <sup>+</sup>     | 1.836 |
| C42H82O4      | 1 | 651.62580 | 650.62131 | [M+H] <sup>+</sup>     | 4.268 |
| C43H86O3      | 1 | 651.66240 | 650.65770 | [M+H] <sup>+</sup>     | 3.938 |
| C32H45NO13    | 2 | 652.29350 | 651.28910 | [M+H] <sup>+</sup>     | 4.392 |
| C32H62NO10P   | 1 | 652.41640 | 651.41114 | [M+H] <sup>+</sup>     | 3.076 |
| C28H55O12P    | 1 | 653.30460 | 614.34312 | [M+K] <sup>+</sup>     | 2.555 |
| C40H54O5      | 2 | 653.35780 | 614.39713 | [M+K] <sup>+</sup>     | 3.790 |
| C33H59O8P     | 1 | 653.35780 | 614.39476 | [M+K] <sup>+</sup>     | 0.167 |
| C31H57O12P    | 1 | 653.36740 | 652.35877 | [M+H] <sup>+</sup>     | 2.083 |
| C33H58O11     | 1 | 653.39030 | 630.39792 | [M+Na] <sup>+</sup>    | 4.841 |
| C34H63O8P     | 1 | 653.41310 | 630.42606 | [M+Na] <sup>+</sup>    | 3.336 |
| C36H61O8P     | 1 | 653.41870 | 652.41041 | [M+H] <sup>+</sup>     | 1.563 |
| C33H65O10P    | 2 | 653.43800 | 652.43154 | [M+H] <sup>+</sup>     | 1.238 |
| C34H69O9P     | 1 | 653.47640 | 652.46792 | [M+H] <sup>+</sup>     | 1.846 |
| C33H62NO8P    | 2 | 654.41080 | 631.42131 | [M+Na] <sup>+</sup>    | 0.416 |
| C33H61O8P     | 1 | 655.37240 | 616.41041 | [M+K] <sup>+</sup>     | 1.768 |
| C36H63O8P     | 4 | 655.43040 | 654.42606 | [M+H] <sup>+</sup>     | 4.469 |
| C34H65O8P     | 4 | 655.43040 | 632.44171 | [M+Na] <sup>+</sup>    | 0.809 |



|             |   |           |           |            |       |
|-------------|---|-----------|-----------|------------|-------|
| C34H69N2O5P | 1 | 655.45780 | 616.49441 | [M+K]+     | 0.365 |
| C40H72O4    | 2 | 655.50870 | 616.54306 | [M+K]+     | 3.797 |
| C35H62NO8P  | 4 | 656.42640 | 655.42131 | [M+H]+     | 3.316 |
| C33H64NO8P  | 3 | 656.42640 | 633.43696 | [M+Na]+    | 0.338 |
| C34H68NO7P  | 2 | 656.46410 | 633.47334 | [M+Na]+    | 2.341 |
| C41H79NO3   | 1 | 656.59500 | 633.60600 | [M+Na]+    | 0.329 |
| C35H54O9    | 1 | 657.34060 | 618.37679 | [M+K]+     | 1.010 |
| C35H54O10   | 1 | 657.35790 | 634.37170 | [M+Na]+    | 4.597 |
| C31H61O12P  | 3 | 657.39660 | 656.39007 | [M+H]+     | 1.124 |
| C34H66O9    | 1 | 657.43120 | 618.47069 | [M+K]+     | 4.010 |
| C34H67O8P   | 3 | 657.44720 | 634.45736 | [M+Na]+    | 0.943 |
| C36H65O8P   | 3 | 657.44760 | 656.44171 | [M+H]+     | 2.098 |
| C36H67O8P   | 1 | 657.44900 | 658.45736 | [M-H]-     | 1.656 |
| C41H64O5    | 1 | 657.44900 | 636.47538 | [M-2H+Na]- | 1.576 |
| C35H73O6P   | 1 | 657.46280 | 620.51448 | [M-2H+K]-  | 0.424 |
| C43H70O3    | 3 | 657.52390 | 634.53250 | [M+Na]+    | 3.320 |
| C42H72O5    | 1 | 657.54300 | 656.53798 | [M+H]+     | 3.416 |
| C40H74O5    | 1 | 657.54300 | 634.55363 | [M+Na]+    | 0.233 |
| C42H74O5    | 1 | 657.54340 | 658.55363 | [M-H]-     | 4.496 |
| C40H76O5    | 1 | 657.54340 | 636.56928 | [M-2H+Na]- | 0.815 |
| C44H76O2    | 1 | 657.56010 | 636.58453 | [M-2H+Na]- | 1.382 |
| C44H74O2    | 1 | 657.56020 | 634.56888 | [M+Na]+    | 3.191 |
| C32H62NO8P  | 1 | 658.38650 | 619.42131 | [M+K]+     | 3.103 |
| C32H64NO8P  | 1 | 658.38700 | 621.43696 | [M-2H+K]-  | 2.192 |
| C35H64NO8P  | 5 | 658.44220 | 657.43696 | [M+H]+     | 3.078 |
| C33H66NO8P  | 2 | 658.44220 | 635.45261 | [M+Na]+    | 0.565 |
| C34H70NO7P  | 2 | 658.47820 | 635.48899 | [M+Na]+    | 0.020 |
| C40H77NO3   | 2 | 658.55440 | 619.59035 | [M+K]+     | 1.374 |
| C32H61O10P  | 1 | 659.39180 | 636.40024 | [M+Na]+    | 3.549 |
| C42H58O6    | 1 | 659.43040 | 658.42334 | [M+H]+     | 0.320 |
| C41H64O4    | 3 | 659.44050 | 620.48046 | [M+K]+     | 4.718 |
| C34H69O7P   | 2 | 659.44050 | 620.47809 | [M+K]+     | 1.128 |
| C34H68O9    | 1 | 659.44650 | 620.48634 | [M+K]+     | 4.528 |
| C43H64O5    | 1 | 659.46570 | 660.47538 | [M-H]-     | 3.648 |
| C36H69O8P   | 1 | 659.46570 | 660.47301 | [M-H]-     | 0.059 |
| C41H66O5    | 1 | 659.46570 | 638.49103 | [M-2H+Na]- | 0.021 |
| C41H64O5    | 1 | 659.46670 | 636.47538 | [M+Na]+    | 3.189 |
| C36H67O8P   | 1 | 659.46670 | 658.45736 | [M+H]+     | 3.140 |
| C39H72O5    | 1 | 659.49960 | 620.53798 | [M+K]+     | 2.314 |
| C37H71O7P   | 1 | 659.49960 | 658.49374 | [M+H]+     | 2.144 |
| C43H72O2    | 1 | 659.51550 | 620.55323 | [M+K]+     | 1.336 |
| C42H74O5    | 2 | 659.55850 | 658.55363 | [M+H]+     | 3.633 |
| C40H76O5    | 3 | 659.55850 | 636.56928 | [M+Na]+    | 0.005 |
| C44H76O2    | 1 | 659.57650 | 636.58453 | [M+Na]+    | 4.166 |
| C42H84O3    | 2 | 659.62840 | 636.64205 | [M+Na]+    | 4.346 |
| C33H68NO7P  | 1 | 660.43700 | 621.47334 | [M+K]+     | 0.769 |
| C35H68NO8P  | 1 | 660.46250 | 661.46826 | [M-H]-     | 2.291 |
| C36H70NO7P  | 1 | 660.49430 | 659.48899 | [M+H]+     | 2.970 |
| C40H73N3O4  | 1 | 660.56600 | 659.56011 | [M+H]+     | 2.085 |
| C36H69O8P   | 2 | 661.47800 | 660.47301 | [M+H]+     | 3.445 |
| C41H66O5    | 2 | 661.47800 | 638.49103 | [M+Na]+    | 3.397 |
| C43H64O5    | 2 | 661.48580 | 660.47538 | [M+H]+     | 4.768 |
| C43H74O2    | 1 | 661.53500 | 622.56888 | [M+K]+     | 4.488 |

|              |   |           |           |           |       |
|--------------|---|-----------|-----------|-----------|-------|
| C39H74O6     | 1 | 661.53500 | 638.54854 | [M+Na]+   | 4.175 |
| C44H78O2     | 1 | 661.59190 | 638.60018 | [M+Na]+   | 3.776 |
| C46H76O2     | 1 | 661.59190 | 660.58453 | [M+H]+    | 0.150 |
| C35H67NO8S   | 1 | 662.46290 | 661.45874 | [M+H]+    | 4.698 |
| C37H71NO6    | 2 | 662.47640 | 625.52814 | [M-2H+K]- | 0.513 |
| C35H70NO8P   | 2 | 662.47640 | 663.48391 | [M-H]-    | 0.358 |
| C35H68NO8P   | 5 | 662.47800 | 661.46826 | [M+H]+    | 3.733 |
| C40H81NO3    | 3 | 662.58360 | 623.62165 | [M+K]+    | 1.804 |
| C33H52O11    | 1 | 663.31650 | 624.35097 | [M+K]+    | 3.594 |
| C37H58O10    | 1 | 663.40910 | 662.40300 | [M+H]+    | 1.765 |
| C34H63O10P   | 2 | 663.42360 | 662.41589 | [M+H]+    | 0.665 |
| C36H75N2O6P  | 1 | 663.54130 | 662.53628 | [M+H]+    | 3.385 |
| C45H90O2     | 1 | 663.70280 | 662.69408 | [M+H]+    | 2.182 |
| C32H51NO12   | 1 | 664.32930 | 641.34113 | [M+Na]+   | 1.582 |
| C34H66NO9P   | 3 | 664.45810 | 663.44752 | [M+H]+    | 4.979 |
| C35H70NO8P   | 5 | 664.49200 | 663.48391 | [M+H]+    | 1.239 |
| C37H71NO6    | 5 | 664.49200 | 625.52814 | [M+K]+    | 1.068 |
| C41H71NO4    | 1 | 664.52880 | 641.53831 | [M+Na]+   | 1.910 |
| C36H74NO7P   | 1 | 664.52880 | 663.52029 | [M+H]+    | 1.861 |
| C37H78NO6P   | 1 | 664.56090 | 663.55668 | [M+H]+    | 4.586 |
| C33H54O11    | 1 | 665.32830 | 626.36662 | [M+K]+    | 2.203 |
| C34H59O8P    | 1 | 665.35610 | 626.39476 | [M+K]+    | 2.719 |
| C30H59O12P   | 1 | 665.36640 | 642.37442 | [M+Na]+   | 4.148 |
| C37H61O8P    | 1 | 665.41800 | 664.41041 | [M+H]+    | 0.482 |
| C34H65O10P   | 2 | 665.43570 | 664.43154 | [M+H]+    | 4.672 |
| C34H67O10P   | 1 | 665.43980 | 666.44719 | [M-H]-    | 0.179 |
| C35H69O9P    | 1 | 665.47660 | 664.46792 | [M+H]+    | 2.113 |
| C42H80O5     | 1 | 665.60920 | 664.60058 | [M+H]+    | 2.034 |
| C30H49N3O10S | 2 | 666.30100 | 643.31387 | [M+Na]+   | 3.138 |
| C29H57O12P   | 1 | 667.32290 | 628.35877 | [M+K]+    | 1.470 |
| C34H61O8P    | 1 | 667.37600 | 628.41041 | [M+K]+    | 3.658 |
| C35H65O8P    | 5 | 667.43330 | 644.44171 | [M+Na]+   | 3.551 |
| C37H63O8P    | 5 | 667.43330 | 666.42606 | [M+H]+    | 0.043 |
| C36H69O7P    | 1 | 667.46750 | 644.47809 | [M+Na]+   | 0.277 |
| C40H68O5     | 2 | 667.47070 | 628.50668 | [M+K]+    | 1.309 |
| C35H71O9P    | 1 | 667.49040 | 666.48357 | [M+H]+    | 0.665 |
| C36H73N2O5P  | 1 | 667.51270 | 644.52571 | [M+Na]+   | 3.344 |
| C43H70O5     | 1 | 667.53090 | 666.52233 | [M+H]+    | 1.953 |
| C46H82O2     | 1 | 667.64020 | 666.63148 | [M+H]+    | 2.170 |
| C34H64NO8P   | 1 | 668.42850 | 645.43696 | [M+Na]+   | 3.474 |
| C35H67O7P    | 2 | 669.42700 | 630.46244 | [M+K]+    | 2.100 |
| C37H65O8P    | 6 | 669.44770 | 668.44171 | [M+H]+    | 1.911 |
| C35H67O8P    | 6 | 669.44770 | 646.45736 | [M+Na]+   | 1.673 |
| C35H71N2O6P  | 2 | 669.49260 | 646.50498 | [M+Na]+   | 2.385 |
| C36H70O9     | 2 | 669.49260 | 646.50199 | [M+Na]+   | 2.081 |
| C43H82O3     | 1 | 669.61310 | 646.62640 | [M+Na]+   | 3.759 |
| C43H88O4     | 2 | 669.67270 | 668.66826 | [M+H]+    | 4.229 |
| C36H64NO8P   | 2 | 670.44100 | 669.43696 | [M+H]+    | 4.813 |
| C34H66NO8P   | 2 | 670.44100 | 647.45261 | [M+Na]+   | 1.235 |
| C35H70NO7P   | 1 | 670.47910 | 647.48899 | [M+Na]+   | 1.323 |
| C42H81NO3    | 1 | 670.60770 | 647.62165 | [M+Na]+   | 4.721 |
| C37H67O8P    | 5 | 671.46220 | 670.45736 | [M+H]+    | 3.617 |
| C35H69O8P    | 5 | 671.46220 | 648.47301 | [M+Na]+   | 0.045 |

|             |   |           |           |            |       |
|-------------|---|-----------|-----------|------------|-------|
| C44H72O2    | 1 | 671.51320 | 632.55323 | [M+K]+     | 4.737 |
| C43H74O5    | 1 | 671.55940 | 670.55363 | [M+H]+     | 2.228 |
| C41H76O5    | 1 | 671.55940 | 648.56928 | [M+Na]+    | 1.345 |
| C32H60NO10P | 2 | 672.38650 | 649.39549 | [M+Na]+    | 2.665 |
| C33H64NO9P  | 2 | 672.42310 | 649.43187 | [M+Na]+    | 2.985 |
| C36H66NO8P  | 5 | 672.45840 | 671.45261 | [M+H]+     | 2.196 |
| C34H68NO8P  | 4 | 672.45840 | 649.46826 | [M+Na]+    | 1.371 |
| C36H68NO8P  | 1 | 672.45990 | 673.46826 | [M-H]-     | 1.616 |
| C35H72NO7P  | 2 | 672.49600 | 649.50464 | [M+Na]+    | 3.178 |
| C37H69O8P   | 1 | 673.47970 | 672.47301 | [M+H]+     | 0.860 |
| C42H66O5    | 1 | 673.47970 | 650.49103 | [M+Na]+    | 0.812 |
| C37H71O8P   | 2 | 673.48120 | 674.48866 | [M-H]-     | 0.281 |
| C42H68O5    | 2 | 673.48120 | 652.50668 | [M-2H+Na]- | 0.202 |
| C43H70O4    | 1 | 673.51970 | 650.52741 | [M+Na]+    | 4.555 |
| C38H73O7P   | 1 | 673.51970 | 672.50939 | [M+H]+     | 4.508 |
| C40H74O5    | 1 | 673.51970 | 634.55363 | [M+K]+     | 4.341 |
| C42H82O4    | 1 | 673.61240 | 650.62131 | [M+Na]+    | 2.773 |
| C43H86O3    | 1 | 673.64620 | 650.65770 | [M+Na]+    | 1.064 |
| C32H62NO10P | 3 | 674.40250 | 651.41114 | [M+Na]+    | 3.176 |
| C34H70NO7P  | 1 | 674.45020 | 635.48899 | [M+K]+     | 2.879 |
| C36H68NO8P  | 2 | 674.47540 | 673.46826 | [M+H]+     | 0.188 |
| C36H70NO8P  | 1 | 674.47640 | 675.48391 | [M-H]-     | 0.351 |
| C37H72NO7P  | 1 | 674.51480 | 673.50464 | [M+H]+     | 4.282 |
| C38H76NO6P  | 1 | 674.54750 | 673.54103 | [M+H]+     | 1.183 |
| C31H57O12P  | 1 | 675.34940 | 652.35877 | [M+Na]+    | 2.088 |
| C32H61O10P  | 1 | 675.36140 | 636.40024 | [M+K]+     | 2.945 |
| C41H64O5    | 1 | 675.44110 | 636.47538 | [M+K]+     | 3.811 |
| C36H69O9P   | 1 | 675.46120 | 676.46792 | [M-H]-     | 0.808 |
| C38H74O9    | 1 | 675.54040 | 674.53329 | [M+H]+     | 0.231 |
| C45H80O2    | 1 | 675.60670 | 652.61583 | [M+Na]+    | 2.439 |
| C47H78O2    | 1 | 675.60670 | 674.60018 | [M+H]+     | 1.112 |
| C43H88O3    | 3 | 675.65960 | 652.67335 | [M+Na]+    | 4.393 |
| C33H57NO13  | 1 | 676.39250 | 675.38300 | [M+H]+     | 3.304 |
| C35H68NO9P  | 1 | 676.45550 | 677.46317 | [M-H]-     | 0.594 |
| C36H70NO8P  | 4 | 676.49190 | 675.48391 | [M+H]+     | 1.069 |
| C36H72NO8P  | 1 | 676.49230 | 677.49956 | [M-H]-     | 0.019 |
| C37H74NO7P  | 1 | 676.52580 | 675.52029 | [M+H]+     | 2.606 |
| C35H65O10P  | 1 | 677.44100 | 676.43154 | [M+H]+     | 3.234 |
| C42H60O7    | 1 | 677.44100 | 676.43350 | [M+H]+     | 0.340 |
| C41H66O5    | 1 | 677.45150 | 638.49103 | [M+K]+     | 3.950 |
| C37H67O7P   | 2 | 677.45150 | 654.46244 | [M+Na]+    | 0.244 |
| C40H78O5    | 2 | 677.54690 | 638.58493 | [M+K]+     | 1.736 |
| C38H77O7P   | 2 | 677.54690 | 676.54069 | [M+H]+     | 1.570 |
| C38H76O9    | 1 | 677.55310 | 676.54894 | [M+H]+     | 4.584 |
| C44H78O2    | 1 | 677.56620 | 638.60018 | [M+K]+     | 4.234 |
| C35H68NO9P  | 1 | 678.46770 | 677.46317 | [M+H]+     | 4.041 |
| C36H72NO8P  | 3 | 678.50920 | 677.49956 | [M+H]+     | 3.497 |
| C38H80NO6P  | 1 | 678.57910 | 677.57233 | [M+H]+     | 0.734 |
| C40H54O7S   | 2 | 679.36330 | 678.35903 | [M+H]+     | 4.414 |
| C43H82O5    | 1 | 679.62590 | 678.61623 | [M+H]+     | 3.537 |
| C41H71NO4   | 1 | 680.50360 | 641.53831 | [M+K]+     | 3.145 |
| C30H59O12P  | 1 | 681.33530 | 642.37442 | [M+K]+     | 3.330 |
| C36H67O7P   | 1 | 681.42670 | 642.46244 | [M+K]+     | 1.623 |

|             |   |           |           |                        |       |
|-------------|---|-----------|-----------|------------------------|-------|
| C38H65O8P   | 4 | 681.44770 | 680.44171 | [M+H] <sup>+</sup>     | 1.877 |
| C36H67O8P   | 4 | 681.44770 | 658.45736 | [M+Na] <sup>+</sup>    | 1.644 |
| C35H69O8PS  | 1 | 681.45260 | 680.44508 | [M+H] <sup>+</sup>     | 0.365 |
| C39H69O7P   | 1 | 681.48700 | 680.47809 | [M+H] <sup>+</sup>     | 2.401 |
| C41H70O5    | 1 | 681.48700 | 642.52233 | [M+K] <sup>+</sup>     | 2.236 |
| C43H84O5    | 1 | 681.63660 | 680.63188 | [M+H] <sup>+</sup>     | 3.735 |
| C37H64NO8P  | 5 | 682.44180 | 681.43696 | [M+H] <sup>+</sup>     | 3.556 |
| C35H66NO8P  | 5 | 682.44180 | 659.45261 | [M+Na] <sup>+</sup>    | 0.041 |
| C40H73N3O4  | 4 | 682.54700 | 659.56011 | [M+Na] <sup>+</sup>    | 3.411 |
| C36H69O7P   | 2 | 683.44400 | 644.47809 | [M+K] <sup>+</sup>     | 4.033 |
| C38H67O8P   | 6 | 683.46270 | 682.45736 | [M+H] <sup>+</sup>     | 2.822 |
| C43H64O5    | 4 | 683.46270 | 660.47538 | [M+Na] <sup>+</sup>    | 2.776 |
| C36H69O8P   | 4 | 683.46270 | 660.47301 | [M+Na] <sup>+</sup>    | 0.688 |
| C37H73O7P   | 1 | 683.50150 | 660.50939 | [M+Na] <sup>+</sup>    | 4.221 |
| C39H71O7P   | 1 | 683.50150 | 682.49374 | [M+H] <sup>+</sup>     | 0.711 |
| C41H72O5    | 1 | 683.50150 | 644.53798 | [M+K] <sup>+</sup>     | 0.547 |
| C42H76O5    | 1 | 683.56090 | 660.56928 | [M+Na] <sup>+</sup>    | 3.515 |
| C44H74O5    | 2 | 683.56090 | 682.55363 | [M+H] <sup>+</sup>     | 0.006 |
| C35H68NO7P  | 3 | 684.43830 | 645.47334 | [M+K] <sup>+</sup>     | 2.642 |
| C35H67NO8S  | 1 | 684.44630 | 661.45874 | [M+Na] <sup>+</sup>    | 2.430 |
| C37H66NO8P  | 6 | 684.46200 | 683.45261 | [M+H] <sup>+</sup>     | 3.102 |
| C36H72NO6P  | 2 | 684.47040 | 645.50973 | [M+K] <sup>+</sup>     | 3.619 |
| C40H63N5O3  | 2 | 684.48120 | 661.49309 | [M+Na] <sup>+</sup>    | 1.623 |
| C39H74NO6P  | 1 | 684.52990 | 683.52538 | [M+H] <sup>+</sup>     | 4.014 |
| C42H85NO5   | 1 | 684.64860 | 683.64278 | [M+H] <sup>+</sup>     | 2.111 |
| C36H54O10   | 1 | 685.33460 | 646.37170 | [M+K] <sup>+</sup>     | 0.366 |
| C37H58O10   | 1 | 685.38980 | 662.40300 | [M+Na] <sup>+</sup>    | 3.534 |
| C34H63O10P  | 1 | 685.40620 | 662.41589 | [M+Na] <sup>+</sup>    | 1.590 |
| C36H71O7P   | 1 | 685.45510 | 646.49374 | [M+K] <sup>+</sup>     | 2.617 |
| C36H70O9    | 2 | 685.46230 | 646.50199 | [M+K] <sup>+</sup>     | 4.137 |
| C36H71O8P   | 2 | 685.47540 | 662.48866 | [M+Na] <sup>+</sup>    | 3.618 |
| C35H70N2O8  | 2 | 685.47540 | 646.51322 | [M+K] <sup>+</sup>     | 1.414 |
| C38H69O8P   | 1 | 685.47710 | 684.47301 | [M+H] <sup>+</sup>     | 4.638 |
| C43H66O5    | 1 | 685.47710 | 662.49103 | [M+Na] <sup>+</sup>    | 4.591 |
| C45H66O5    | 1 | 685.48140 | 686.49103 | [M-H] <sup>-</sup>     | 3.437 |
| C43H68O5    | 1 | 685.48140 | 664.50668 | [M-2H+Na] <sup>-</sup> | 0.093 |
| C38H71O8P   | 1 | 685.48140 | 686.48866 | [M-H] <sup>-</sup>     | 0.016 |
| C37H75O7P   | 1 | 685.51200 | 662.52504 | [M+Na] <sup>+</sup>    | 3.304 |
| C36H75N2O6P | 1 | 685.52690 | 662.53628 | [M+Na] <sup>+</sup>    | 2.047 |
| C33H62NO10P | 2 | 686.39890 | 663.41114 | [M+Na] <sup>+</sup>    | 2.124 |
| C34H66NO8P  | 1 | 686.41430 | 647.45261 | [M+K] <sup>+</sup>     | 2.123 |
| C34H66NO9P  | 1 | 686.43890 | 663.44752 | [M+Na] <sup>+</sup>    | 3.142 |
| C35H70NO7P  | 1 | 686.45180 | 647.48899 | [M+K] <sup>+</sup>     | 0.498 |
| C37H68NO8P  | 5 | 686.47430 | 685.46826 | [M+H] <sup>+</sup>     | 1.787 |
| C37H70NO8P  | 1 | 686.47870 | 687.48391 | [M-H] <sup>-</sup>     | 3.005 |
| C36H74NO7P  | 3 | 686.50610 | 663.52029 | [M+Na] <sup>+</sup>    | 4.973 |
| C38H72NO7P  | 3 | 686.51040 | 685.50464 | [M+H] <sup>+</sup>     | 2.202 |
| C37H78NO6P  | 1 | 686.54620 | 663.55668 | [M+Na] <sup>+</sup>    | 0.438 |
| C43H85NO3   | 2 | 686.64260 | 663.65295 | [M+Na] <sup>+</sup>    | 0.632 |
| C37H61O8P   | 1 | 687.39790 | 664.41041 | [M+Na] <sup>+</sup>    | 2.517 |
| C36H63O10P  | 2 | 687.42170 | 686.41589 | [M+H] <sup>+</sup>     | 2.122 |
| C34H65O10P  | 1 | 687.42170 | 664.43154 | [M+Na] <sup>+</sup>    | 1.367 |
| C35H69O9P   | 2 | 687.45740 | 664.46792 | [M+Na] <sup>+</sup>    | 0.371 |

|              |   |           |           |            |       |
|--------------|---|-----------|-----------|------------|-------|
| C35H71O9P    | 1 | 687.46050 | 666.48357 | [M-2H+Na]- | 3.296 |
| C43H68O4     | 5 | 687.47830 | 648.51176 | [M+K]+     | 4.930 |
| C36H72O9     | 2 | 687.47830 | 648.51764 | [M+K]+     | 3.616 |
| C35H73N2O6P  | 1 | 687.48600 | 648.52063 | [M+K]+     | 3.235 |
| C45H68O5     | 1 | 687.49670 | 688.50668 | [M-H]-     | 3.936 |
| C38H73O8P    | 1 | 687.49670 | 688.50431 | [M-H]-     | 0.493 |
| C43H70O5     | 1 | 687.49670 | 666.52233 | [M-2H+Na]- | 0.416 |
| C43H68O5     | 1 | 687.49910 | 664.50668 | [M+Na]+    | 4.659 |
| C38H71O8P    | 1 | 687.49910 | 686.48866 | [M+H]+     | 4.612 |
| C45H66O5     | 2 | 687.49950 | 686.49103 | [M+H]+     | 1.751 |
| C39H75O7P    | 1 | 687.53330 | 686.52504 | [M+H]+     | 1.434 |
| C38H75N2O6P  | 1 | 687.54160 | 686.53628 | [M+H]+     | 2.830 |
| C32H60NO10P  | 1 | 688.35550 | 649.39549 | [M+K]+     | 4.557 |
| C33H64NO9P   | 1 | 688.39660 | 649.43187 | [M+K]+     | 2.292 |
| C36H68NO9P   | 1 | 688.45570 | 689.46317 | [M-H]-     | 0.293 |
| C37H72NO8P   | 3 | 688.49280 | 689.49956 | [M-H]-     | 0.745 |
| C37H70NO8P   | 5 | 688.49370 | 687.48391 | [M+H]+     | 3.665 |
| C36H76NO6P   | 2 | 688.50410 | 649.54103 | [M+K]+     | 0.113 |
| C38H74NO7P   | 2 | 688.52680 | 687.52029 | [M+H]+     | 1.108 |
| C42H83NO3    | 1 | 688.60170 | 649.63730 | [M+K]+     | 1.823 |
| C34H67O9P    | 3 | 689.41350 | 650.45227 | [M+K]+     | 2.791 |
| C36H65O10P   | 4 | 689.43690 | 688.43154 | [M+H]+     | 2.769 |
| C34H67O10P   | 4 | 689.43690 | 666.44719 | [M+Na]+    | 0.711 |
| C35H71O9P    | 1 | 689.47610 | 666.48357 | [M+Na]+    | 4.794 |
| C37H71O9P    | 1 | 689.47610 | 690.48357 | [M-H]-     | 0.296 |
| C38H73O8P    | 1 | 689.51400 | 688.50431 | [M+H]+     | 3.511 |
| C45H68O5     | 2 | 689.51630 | 688.50668 | [M+H]+     | 3.414 |
| C42H82O5     | 1 | 689.60820 | 666.61623 | [M+Na]+    | 3.992 |
| C44H80O5     | 1 | 689.60820 | 688.60058 | [M+H]+     | 0.513 |
| C34H59NO13   | 2 | 690.40660 | 689.39865 | [M+H]+     | 0.992 |
| C36H70NO9P   | 1 | 690.47110 | 691.47882 | [M-H]-     | 0.655 |
| C37H74NO8P   | 2 | 690.50780 | 691.51521 | [M-H]-     | 0.200 |
| C37H72NO8P   | 6 | 690.50820 | 689.49956 | [M+H]+     | 1.988 |
| C42H85NO3    | 2 | 690.61500 | 651.65295 | [M+K]+     | 1.586 |
| C36H61O8P    | 1 | 691.37560 | 652.41041 | [M+K]+     | 2.952 |
| C33H65O10P   | 1 | 691.39430 | 652.43154 | [M+K]+     | 0.563 |
| C37H65O7P    | 1 | 691.41070 | 652.44679 | [M+K]+     | 1.093 |
| C34H69O9P    | 5 | 691.42980 | 652.46792 | [M+K]+     | 1.843 |
| C39H63O8P    | 3 | 691.43130 | 690.42606 | [M+H]+     | 2.934 |
| C36H69O10P   | 1 | 691.45660 | 692.46284 | [M-H]-     | 1.491 |
| C36H67O10P   | 1 | 691.45690 | 690.44719 | [M+H]+     | 3.530 |
| C42H68O5     | 1 | 691.47010 | 652.50668 | [M+K]+     | 0.396 |
| C37H71O9P    | 3 | 691.48780 | 690.48357 | [M+H]+     | 4.402 |
| C38H75O8P    | 2 | 691.52570 | 690.51996 | [M+H]+     | 2.211 |
| C43H72O5     | 2 | 691.52570 | 668.53798 | [M+Na]+    | 2.165 |
| C45H70O5     | 1 | 691.52700 | 690.52233 | [M+H]+     | 3.754 |
| C48H82O2     | 1 | 691.63910 | 690.63148 | [M+H]+     | 0.505 |
| C33H57NO14   | 1 | 692.38600 | 691.37791 | [M+H]+     | 1.184 |
| C37H74NO8P   | 5 | 692.52480 | 691.51521 | [M+H]+     | 3.353 |
| C38H78NO7P   | 1 | 692.55700 | 691.55159 | [M+H]+     | 2.690 |
| C39H82NO6P   | 1 | 692.59360 | 691.58798 | [M+H]+     | 2.379 |
| C31H51NaO12S | 1 | 693.28720 | 670.29990 | [M+Na]+    | 2.767 |
| C31H59O12P   | 1 | 693.33490 | 654.37442 | [M+K]+     | 3.849 |

|             |   |           |           |                     |       |
|-------------|---|-----------|-----------|---------------------|-------|
| C39H65O8P   | 1 | 693.44950 | 692.44171 | [M+H] <sup>+</sup>  | 0.751 |
| C36H69O10P  | 1 | 693.47010 | 692.46284 | [M+H] <sup>+</sup>  | 0.013 |
| C36H71O10P  | 1 | 693.47160 | 694.47849 | [M-H] <sup>-</sup>  | 0.549 |
| C37H73O9P   | 1 | 693.50490 | 692.49922 | [M+H] <sup>+</sup>  | 2.298 |
| C44H84O5    | 1 | 693.63740 | 692.63188 | [M+H] <sup>+</sup>  | 2.517 |
| C35H68NO10P | 1 | 694.46210 | 693.45809 | [M+H] <sup>+</sup>  | 4.690 |
| C36H72NO9P  | 1 | 694.50350 | 693.49447 | [M+H] <sup>+</sup>  | 2.530 |
| C38H73NO8   | 1 | 694.52490 | 671.53362 | [M+Na] <sup>+</sup> | 2.965 |
| C37H69O7P   | 2 | 695.44200 | 656.47809 | [M+K] <sup>+</sup>  | 1.087 |
| C35H66O13   | 1 | 695.45640 | 694.45035 | [M+H] <sup>+</sup>  | 1.748 |
| C39H67O8P   | 6 | 695.46290 | 694.45736 | [M+H] <sup>+</sup>  | 2.486 |
| C37H69O8P   | 5 | 695.46290 | 672.47301 | [M+Na] <sup>+</sup> | 0.963 |
| C42H72O5    | 1 | 695.50020 | 656.53798 | [M+K] <sup>+</sup>  | 1.331 |
| C43H76O5    | 1 | 695.55610 | 672.56928 | [M+Na] <sup>+</sup> | 3.446 |
| C44H86O5    | 1 | 695.65370 | 694.64753 | [M+H] <sup>+</sup>  | 1.577 |
| C38H66NO8P  | 2 | 696.45760 | 695.45261 | [M+H] <sup>+</sup>  | 3.269 |
| C36H68NO8P  | 1 | 696.45760 | 673.46826 | [M+Na] <sup>+</sup> | 0.175 |
| C38H75NO8   | 1 | 696.53670 | 673.54927 | [M+Na] <sup>+</sup> | 2.571 |
| C44H89NO4   | 1 | 696.68780 | 695.67916 | [M+H] <sup>+</sup>  | 1.966 |
| C37H71O8P   | 6 | 697.47910 | 674.48866 | [M+Na] <sup>+</sup> | 1.749 |
| C39H69O8P   | 6 | 697.47910 | 696.47301 | [M+H] <sup>+</sup>  | 1.690 |
| C38H74O9    | 1 | 697.52030 | 674.53329 | [M+Na] <sup>+</sup> | 3.164 |
| C43H78O5    | 1 | 697.57550 | 674.58493 | [M+Na] <sup>+</sup> | 1.940 |
| C45H76O5    | 1 | 697.57550 | 696.56928 | [M+H] <sup>+</sup>  | 1.499 |
| C32H53NO11S | 1 | 698.29580 | 659.33394 | [M+K] <sup>+</sup>  | 1.843 |
| C34H62NO10P | 1 | 698.39810 | 675.41114 | [M+Na] <sup>+</sup> | 3.233 |
| C36H70NO7P  | 2 | 698.45400 | 659.48899 | [M+K] <sup>+</sup>  | 2.660 |
| C38H68NO8P  | 5 | 698.47420 | 697.46826 | [M+H] <sup>+</sup>  | 1.900 |
| C36H70NO8P  | 1 | 698.47420 | 675.48391 | [M+Na] <sup>+</sup> | 1.535 |
| C44H85NO3   | 1 | 698.64130 | 675.65295 | [M+Na] <sup>+</sup> | 1.240 |
| C33H63O13P  | 3 | 699.40670 | 698.40063 | [M+H] <sup>+</sup>  | 1.721 |
| C35H65O10P  | 1 | 699.41850 | 676.43154 | [M+Na] <sup>+</sup> | 3.231 |
| C36H69O9P   | 1 | 699.45530 | 676.46792 | [M+Na] <sup>+</sup> | 2.638 |
| C37H73O7P   | 1 | 699.47040 | 660.50939 | [M+K] <sup>+</sup>  | 3.065 |
| C39H73O8P   | 1 | 699.49800 | 700.50431 | [M-H] <sup>-</sup>  | 1.374 |
| C39H71O8P   | 1 | 699.49840 | 698.48866 | [M+H] <sup>+</sup>  | 3.533 |
| C37H77N2O6P | 1 | 699.53820 | 676.55193 | [M+Na] <sup>+</sup> | 4.213 |
| C38H76O9    | 1 | 699.53820 | 676.54894 | [M+Na] <sup>+</sup> | 0.061 |
| C46H76O2    | 1 | 699.54880 | 660.58453 | [M+K] <sup>+</sup>  | 1.600 |
| C43H80O5    | 2 | 699.59160 | 676.60058 | [M+Na] <sup>+</sup> | 2.577 |
| C45H78O5    | 1 | 699.59160 | 698.58493 | [M+H] <sup>+</sup>  | 0.852 |
| C47H80O2    | 1 | 699.60820 | 676.61583 | [M+Na] <sup>+</sup> | 4.500 |
| C49H78O2    | 1 | 699.60820 | 698.60018 | [M+H] <sup>+</sup>  | 1.071 |
| C46H92O2    | 1 | 699.69640 | 676.70973 | [M+Na] <sup>+</sup> | 3.649 |
| C36H62NO10P | 1 | 700.41620 | 699.41114 | [M+H] <sup>+</sup>  | 3.151 |
| C34H64NO10P | 2 | 700.41620 | 677.42679 | [M+Na] <sup>+</sup> | 0.274 |
| C35H67NO8S  | 1 | 700.42200 | 661.45874 | [M+K] <sup>+</sup>  | 0.154 |
| C35H68NO8P  | 1 | 700.43080 | 661.46826 | [M+K] <sup>+</sup>  | 0.867 |
| C40H63N5O3  | 1 | 700.45350 | 661.49309 | [M+K] <sup>+</sup>  | 3.912 |
| C35H68NO9P  | 2 | 700.45540 | 677.46317 | [M+Na] <sup>+</sup> | 4.293 |
| C36H72NO7P  | 2 | 700.46990 | 661.50464 | [M+K] <sup>+</sup>  | 3.009 |
| C38H70NO8P  | 5 | 700.49010 | 699.48391 | [M+H] <sup>+</sup>  | 1.537 |
| C36H72NO8P  | 2 | 700.49050 | 677.49956 | [M+Na] <sup>+</sup> | 2.458 |

|             |   |           |           |            |       |
|-------------|---|-----------|-----------|------------|-------|
| C38H72NO8P  | 1 | 700.49210 | 701.49956 | [M-H]-     | 0.267 |
| C37H76NO7P  | 1 | 700.52360 | 677.53594 | [M+Na]+    | 2.233 |
| C38H63O8P   | 1 | 701.41190 | 678.42606 | [M+Na]+    | 4.819 |
| C37H65O10P  | 2 | 701.43690 | 700.43154 | [M+H]+     | 2.722 |
| C35H67O10P  | 4 | 701.43690 | 678.44719 | [M+Na]+    | 0.699 |
| C36H73O9P   | 1 | 701.47590 | 680.49922 | [M-2H+Na]- | 2.874 |
| C37H75O7P   | 1 | 701.48550 | 662.52504 | [M+K]+     | 3.840 |
| C39H73O8P   | 1 | 701.51410 | 700.50431 | [M+H]+     | 3.594 |
| C40H77O7P   | 2 | 701.54970 | 700.54069 | [M+H]+     | 2.475 |
| C42H78O5    | 2 | 701.54970 | 662.58493 | [M+K]+     | 2.315 |
| C39H77N2O6P | 1 | 701.55770 | 700.55193 | [M+H]+     | 2.132 |
| C46H78O2    | 1 | 701.56600 | 662.60018 | [M+K]+     | 3.804 |
| C41H80O8    | 2 | 701.59090 | 700.58532 | [M+H]+     | 2.410 |
| C45H80O5    | 1 | 701.60550 | 700.60058 | [M+H]+     | 3.344 |
| C43H82O5    | 1 | 701.60550 | 678.61623 | [M+Na]+    | 0.076 |
| C49H80O2    | 1 | 701.62590 | 700.61583 | [M+H]+     | 3.989 |
| C34H66NO9P  | 1 | 702.41410 | 663.44752 | [M+K]+     | 4.880 |
| C36H64NO10P | 3 | 702.43090 | 701.42679 | [M+H]+     | 4.494 |
| C34H66NO10P | 2 | 702.43090 | 679.44244 | [M+Na]+    | 1.079 |
| C35H70NO8P  | 1 | 702.44810 | 663.48391 | [M+K]+     | 1.485 |
| C38H65NO9   | 1 | 702.45240 | 679.46594 | [M+Na]+    | 3.923 |
| C38H72NO8P  | 4 | 702.50840 | 701.49956 | [M+H]+     | 2.239 |
| C38H74NO8P  | 2 | 702.50850 | 703.51521 | [M-H]-     | 0.800 |
| C37H78NO6P  | 1 | 702.51930 | 663.55668 | [M+K]+     | 0.752 |
| C39H76NO7P  | 1 | 702.54060 | 701.53594 | [M+H]+     | 3.719 |
| C39H78NO7P  | 2 | 702.54130 | 703.55159 | [M-H]-     | 4.303 |
| C40H80NO6P  | 1 | 702.57980 | 701.57233 | [M+H]+     | 0.288 |
| C43H85NO3   | 1 | 702.61350 | 663.65295 | [M+K]+     | 3.693 |
| C40H56O6S   | 1 | 703.34130 | 664.37976 | [M+K]+     | 2.295 |
| C37H61O8P   | 1 | 703.37060 | 664.41041 | [M+K]+     | 4.207 |
| C34H65O10P  | 1 | 703.39200 | 664.43154 | [M+K]+     | 3.823 |
| C34H64O13   | 2 | 703.42540 | 680.43470 | [M+Na]+    | 2.108 |
| C35H69O8PS  | 1 | 703.43090 | 680.44508 | [M+Na]+    | 4.836 |
| C37H67O10P  | 3 | 703.45240 | 702.44719 | [M+H]+     | 2.927 |
| C35H69O10P  | 5 | 703.45240 | 680.46284 | [M+Na]+    | 0.483 |
| C39H69O7P   | 2 | 703.46570 | 680.47809 | [M+Na]+    | 2.296 |
| C36H73O9P   | 1 | 703.48510 | 680.49922 | [M+Na]+    | 4.755 |
| C39H75O8P   | 1 | 703.52480 | 702.51996 | [M+H]+     | 3.453 |
| C39H77O8P   | 1 | 703.52500 | 704.53561 | [M-H]-     | 4.746 |
| C44H74O5    | 1 | 703.52500 | 682.55363 | [M-2H+Na]- | 4.671 |
| C39H79N2O6P | 1 | 703.57280 | 702.56758 | [M+H]+     | 2.908 |
| C45H82O5    | 1 | 703.62010 | 702.61623 | [M+H]+     | 4.826 |
| C43H84O5    | 1 | 703.62010 | 680.63188 | [M+Na]+    | 1.417 |
| C34H68NO9P  | 3 | 704.42880 | 665.46317 | [M+K]+     | 3.518 |
| C36H66NO10P | 1 | 704.44690 | 703.44244 | [M+H]+     | 3.985 |
| C37H70NO9P  | 3 | 704.48590 | 703.47882 | [M+H]+     | 0.273 |
| C37H72NO9P  | 1 | 704.48700 | 705.49447 | [M-H]-     | 0.288 |
| C38H74NO8P  | 5 | 704.52390 | 703.51521 | [M+H]+     | 2.018 |
| C39H78NO7P  | 1 | 704.55540 | 703.55159 | [M+H]+     | 4.915 |
| C36H58O12   | 1 | 705.38070 | 682.39283 | [M+Na]+    | 1.917 |
| C35H71O9P   | 3 | 705.44490 | 666.48357 | [M+K]+     | 2.586 |
| C40H65O8P   | 1 | 705.44670 | 704.44171 | [M+H]+     | 3.231 |
| C37H69O10P  | 3 | 705.47120 | 704.46284 | [M+H]+     | 1.546 |

|              |   |           |           |            |       |
|--------------|---|-----------|-----------|------------|-------|
| C37H71O10P   | 1 | 705.47200 | 706.47849 | [M-H]-     | 1.107 |
| C39H73O7P    | 1 | 705.48110 | 684.50939 | [M-2H+Na]- | 4.187 |
| C39H71O7P    | 1 | 705.48310 | 682.49374 | [M+Na]+    | 0.191 |
| C41H69O7P    | 2 | 705.48840 | 704.47809 | [M+H]+     | 4.303 |
| C43H70O5     | 1 | 705.48840 | 666.52233 | [M+K]+     | 4.145 |
| C41H71O7P    | 1 | 705.48990 | 706.49374 | [M-H]-     | 4.856 |
| C43H72O5     | 1 | 705.48990 | 668.53798 | [M-2H+K]-  | 4.712 |
| C39H77O8P    | 1 | 705.54580 | 704.53561 | [M+H]+     | 4.140 |
| C49H84O2     | 1 | 705.65750 | 704.64713 | [M+H]+     | 4.392 |
| C34H59NO14   | 1 | 706.40250 | 705.39356 | [M+H]+     | 2.364 |
| C36H68NO10P  | 1 | 706.46780 | 705.45809 | [M+H]+     | 3.458 |
| C37H74NO9P   | 1 | 706.50250 | 707.51012 | [M-H]-     | 0.500 |
| C37H72NO9P   | 4 | 706.50350 | 705.49447 | [M+H]+     | 2.487 |
| C39H74NO6P   | 1 | 706.51380 | 683.52538 | [M+Na]+    | 1.131 |
| C38H76NO8P   | 1 | 706.53980 | 705.53086 | [M+H]+     | 2.366 |
| C40H84NO6P   | 2 | 706.61210 | 705.60363 | [M+H]+     | 1.701 |
| C42H85NO4    | 2 | 706.61210 | 667.64786 | [M+K]+     | 1.543 |
| C32H53NaO12S | 1 | 707.30300 | 684.31555 | [M+Na]+    | 2.500 |
| C37H71O10P   | 1 | 707.48270 | 706.47849 | [M+H]+     | 4.324 |
| C37H73O10P   | 1 | 707.48730 | 708.49414 | [M-H]-     | 0.609 |
| C41H71O7P    | 1 | 707.50260 | 706.49374 | [M+H]+     | 2.242 |
| C37H68NO8P   | 1 | 708.45610 | 685.46826 | [M+Na]+    | 1.945 |
| C39H66NO8P   | 3 | 708.45790 | 707.45261 | [M+H]+     | 2.791 |
| C36H70NO10P  | 1 | 708.48220 | 707.47374 | [M+H]+     | 1.684 |
| C37H74NO9P   | 1 | 708.52020 | 707.51012 | [M+H]+     | 3.962 |
| C41H73NO8    | 1 | 708.54200 | 707.53362 | [M+H]+     | 1.567 |
| C38H71O7P    | 4 | 709.46000 | 670.49374 | [M+K]+     | 4.378 |
| C40H69O8P    | 3 | 709.47890 | 708.47301 | [M+H]+     | 1.944 |
| C45H66O5     | 2 | 709.47890 | 686.49103 | [M+Na]+    | 1.899 |
| C38H71O8P    | 2 | 709.47890 | 686.48866 | [M+Na]+    | 1.438 |
| C37H73O8PS   | 1 | 709.48040 | 708.47638 | [M+H]+     | 4.582 |
| C38H77O9P    | 1 | 709.53770 | 708.53052 | [M+H]+     | 0.132 |
| C44H78O5     | 1 | 709.57450 | 686.58493 | [M+Na]+    | 0.497 |
| C39H68NO8P   | 6 | 710.47420 | 709.46826 | [M+H]+     | 1.868 |
| C37H70NO8P   | 1 | 710.47420 | 687.48391 | [M+Na]+    | 1.509 |
| C38H73NO8    | 1 | 710.49690 | 671.53362 | [M+K]+     | 0.183 |
| C38H73O7P    | 1 | 711.46940 | 672.50939 | [M+K]+     | 4.419 |
| C37H73N2O6P  | 1 | 711.48690 | 672.52063 | [M+K]+     | 4.391 |
| C45H68O5     | 1 | 711.49350 | 688.50668 | [M+Na]+    | 3.369 |
| C38H73O8P    | 1 | 711.49350 | 688.50431 | [M+Na]+    | 0.042 |
| C40H71O8P    | 3 | 711.49890 | 710.48866 | [M+H]+     | 4.176 |
| C39H77O7P    | 1 | 711.52740 | 688.54069 | [M+Na]+    | 3.535 |
| C50H72       | 1 | 711.52740 | 672.56340 | [M+K]+     | 1.193 |
| C34H59NO13   | 1 | 712.39100 | 689.39865 | [M+Na]+    | 4.399 |
| C35H64NO10P  | 1 | 712.41370 | 689.42679 | [M+Na]+    | 3.240 |
| C36H68NO8P   | 1 | 712.43120 | 673.46826 | [M+K]+     | 0.291 |
| C36H70NO8P   | 1 | 712.43370 | 675.48391 | [M-2H+K]-  | 1.675 |
| C34H66NO12P  | 4 | 712.43980 | 711.43227 | [M+H]+     | 0.369 |
| C36H68NO9P   | 5 | 712.45230 | 689.46317 | [M+Na]+    | 0.131 |
| C37H72NO7P   | 3 | 712.46570 | 673.50464 | [M+K]+     | 2.936 |
| C39H70NO8P   | 6 | 712.49000 | 711.48391 | [M+H]+     | 1.652 |
| C37H74NO8P   | 1 | 712.49160 | 691.51521 | [M-2H+Na]- | 2.431 |
| C39H72NO8P   | 1 | 712.49160 | 713.49956 | [M-H]-     | 0.964 |



|              |   |           |           |            |       |
|--------------|---|-----------|-----------|------------|-------|
| C38H76NO6P   | 3 | 712.50250 | 673.54103 | [M+K]+     | 2.355 |
| C38H75NO8    | 3 | 712.50910 | 673.54927 | [M+K]+     | 4.660 |
| C38H76NO7P   | 5 | 712.52500 | 689.53594 | [M+Na]+    | 0.230 |
| C42H81NO7    | 1 | 712.60810 | 711.60131 | [M+H]+     | 0.667 |
| C34H65O13P   | 2 | 713.42710 | 712.41628 | [M+H]+     | 4.970 |
| C38H65O10P   | 1 | 713.44160 | 712.43154 | [M+H]+     | 3.912 |
| C46H64O6     | 3 | 713.47460 | 712.47029 | [M+H]+     | 4.150 |
| C37H71O9P    | 2 | 713.47460 | 690.48357 | [M+Na]+    | 2.530 |
| C38H74O9     | 4 | 713.49320 | 674.53329 | [M+K]+     | 4.535 |
| C38H75O8P    | 2 | 713.50600 | 690.51996 | [M+Na]+    | 4.457 |
| C47H68O5     | 5 | 713.51230 | 712.50668 | [M+H]+     | 2.307 |
| C45H70O5     | 4 | 713.51230 | 690.52233 | [M+Na]+    | 1.055 |
| C40H73O8P    | 5 | 713.51230 | 712.50431 | [M+H]+     | 1.010 |
| C39H79O7P    | 1 | 713.54370 | 690.55634 | [M+Na]+    | 2.614 |
| C46H80O5     | 1 | 713.61080 | 712.60058 | [M+H]+     | 4.140 |
| C33H57NO13   | 1 | 714.34300 | 675.38300 | [M+K]+     | 4.403 |
| C33H57NO14   | 1 | 714.36850 | 691.37791 | [M+Na]+    | 1.916 |
| C34H62NO10P  | 1 | 714.37530 | 675.41114 | [M+K]+     | 1.418 |
| C37H64NO10P  | 1 | 714.43170 | 713.42679 | [M+H]+     | 3.299 |
| C35H66NO10P  | 1 | 714.43170 | 691.44244 | [M+Na]+    | 0.059 |
| C36H70NO8P   | 1 | 714.44780 | 675.48391 | [M+K]+     | 1.040 |
| C36H70NO9P   | 1 | 714.46640 | 691.47882 | [M+Na]+    | 2.300 |
| C36H72NO9P   | 1 | 714.47090 | 693.49447 | [M-2H+Na]- | 2.473 |
| C37H74NO7P   | 1 | 714.48000 | 675.52029 | [M+K]+     | 4.819 |
| C39H72NO8P   | 4 | 714.50670 | 713.49956 | [M+H]+     | 0.178 |
| C39H74NO8P   | 2 | 714.50850 | 715.51521 | [M-H]-     | 0.787 |
| C38H80NO6P   | 1 | 714.51900 | 677.57233 | [M-2H+K]-  | 2.698 |
| C40H76NO7P   | 5 | 714.54060 | 713.53594 | [M+H]+     | 3.657 |
| C38H78NO7P   | 3 | 714.54060 | 691.55159 | [M+Na]+    | 0.299 |
| C44H85NO3    | 1 | 714.61360 | 675.65295 | [M+K]+     | 3.491 |
| C36H52O13    | 2 | 715.32930 | 692.34080 | [M+Na]+    | 1.002 |
| C33H55NaO13S | 1 | 715.33530 | 714.32611 | [M+H]+     | 2.681 |
| C42H60O7     | 1 | 715.39840 | 676.43390 | [M+K]+     | 1.887 |
| C39H65O8P    | 2 | 715.43360 | 692.44171 | [M+Na]+    | 3.732 |
| C36H69O9P    | 2 | 715.43360 | 676.46792 | [M+K]+     | 3.531 |
| C41H63O8P    | 2 | 715.43360 | 714.42606 | [M+H]+     | 0.379 |
| C36H69O10P   | 4 | 715.45360 | 692.46284 | [M+Na]+    | 2.152 |
| C38H67O10P   | 5 | 715.45360 | 714.44719 | [M+H]+     | 1.201 |
| C37H73O8P    | 3 | 715.47100 | 676.50431 | [M+K]+     | 4.949 |
| C37H73O9P    | 1 | 715.48760 | 692.49922 | [M+Na]+    | 1.181 |
| C46H68O6     | 1 | 715.49160 | 716.50159 | [M-H]-     | 3.803 |
| C37H75O9P    | 1 | 715.49160 | 694.51487 | [M-2H+Na]- | 2.888 |
| C39H73O9P    | 1 | 715.49160 | 716.49922 | [M-H]-     | 0.495 |
| C38H76O9     | 3 | 715.50960 | 676.54894 | [M+K]+     | 3.474 |
| C37H77N2O6P  | 1 | 715.51730 | 676.55193 | [M+K]+     | 3.108 |
| C47H70O5     | 2 | 715.52660 | 714.52233 | [M+H]+     | 4.187 |
| C40H75O8P    | 2 | 715.52660 | 714.51996 | [M+H]+     | 0.879 |
| C45H72O5     | 2 | 715.52660 | 692.53798 | [M+Na]+    | 0.834 |
| C42H82O8     | 1 | 715.60640 | 714.60097 | [M+H]+     | 2.573 |
| C46H92O2     | 1 | 715.67320 | 676.70973 | [M+K]+     | 0.444 |
| C46H92O3     | 1 | 715.69310 | 692.70465 | [M+Na]+    | 1.073 |
| C36H72NO9P   | 1 | 716.48490 | 693.49447 | [M+Na]+    | 1.683 |
| C38H72NO9P   | 1 | 716.48690 | 717.49447 | [M-H]-     | 0.423 |

|              |   |           |           |            |       |
|--------------|---|-----------|-----------|------------|-------|
| C37H76NO7P   | 2 | 716.50070 | 677.53594 | [M+K]+     | 2.243 |
| C39H76NO8P   | 2 | 716.52330 | 717.53086 | [M-H]-     | 0.402 |
| C39H74NO8P   | 5 | 716.52350 | 715.51521 | [M+H]+     | 1.426 |
| C38H80NO6P   | 1 | 716.53740 | 677.57233 | [M+K]+     | 2.682 |
| C40H78NO7P   | 1 | 716.56190 | 715.55159 | [M+H]+     | 4.238 |
| C40H53NaO8S  | 1 | 717.34230 | 716.33589 | [M+H]+     | 1.197 |
| C39H67O7P    | 1 | 717.42680 | 678.46244 | [M+K]+     | 1.681 |
| C35H66O13    | 2 | 717.43910 | 694.45035 | [M+Na]+    | 0.651 |
| C37H64O13    | 4 | 717.44490 | 716.43470 | [M+H]+     | 4.090 |
| C36H71O9P    | 5 | 717.44490 | 678.48357 | [M+K]+     | 2.542 |
| C41H65O8P    | 2 | 717.44590 | 716.44171 | [M+H]+     | 4.292 |
| C38H69O10P   | 5 | 717.46880 | 716.46284 | [M+H]+     | 1.824 |
| C36H71O10P   | 4 | 717.46880 | 694.47849 | [M+Na]+    | 1.519 |
| C38H71O10P   | 1 | 717.47240 | 718.47849 | [M-H]-     | 1.646 |
| C39H73O9P    | 1 | 717.50900 | 716.49922 | [M+H]+     | 3.493 |
| C46H68O6     | 1 | 717.50900 | 716.50159 | [M+H]+     | 0.194 |
| C45H74O5     | 1 | 717.54470 | 694.55363 | [M+Na]+    | 2.582 |
| C40H77O8P    | 1 | 717.54470 | 716.53561 | [M+H]+     | 2.538 |
| C47H72O5     | 1 | 717.54470 | 716.53798 | [M+H]+     | 0.761 |
| C44H86O5     | 1 | 717.63870 | 694.64753 | [M+Na]+    | 2.720 |
| C46H84O5     | 1 | 717.63870 | 716.63188 | [M+H]+     | 0.621 |
| C35H70NO9P   | 1 | 718.43900 | 679.47882 | [M+K]+     | 4.137 |
| C39H70NO7P   | 2 | 718.47520 | 695.48899 | [M+Na]+    | 4.194 |
| C38H74NO9P   | 1 | 718.50270 | 719.51012 | [M-H]-     | 0.213 |
| C39H76NO8P   | 5 | 718.53990 | 717.53086 | [M+H]+     | 2.466 |
| C44H89NO3    | 1 | 718.64840 | 679.68425 | [M+K]+     | 1.398 |
| C39H69O7P    | 1 | 719.43950 | 680.47809 | [M+K]+     | 2.424 |
| C36H73O9P    | 4 | 719.46090 | 680.49922 | [M+K]+     | 2.049 |
| C41H67O8P    | 1 | 719.46460 | 718.45736 | [M+H]+     | 0.040 |
| C38H71O10P   | 1 | 719.48220 | 718.47849 | [M+H]+     | 4.947 |
| C38H73O10P   | 2 | 719.48670 | 720.49414 | [M-H]-     | 0.235 |
| C40H75O7P    | 2 | 719.49670 | 698.52504 | [M-2H+Na]- | 4.175 |
| C44H74O5     | 1 | 719.50560 | 682.55363 | [M-2H+K]-  | 4.689 |
| C39H75O9P    | 2 | 719.52030 | 718.51487 | [M+H]+     | 2.563 |
| C40H79O8P    | 1 | 719.55570 | 718.55126 | [M+H]+     | 3.932 |
| C47H74O5     | 1 | 719.56390 | 718.55363 | [M+H]+     | 4.175 |
| C40H83N2O6P  | 1 | 719.60440 | 718.59888 | [M+H]+     | 2.426 |
| C47H84O2     | 1 | 719.61310 | 680.64713 | [M+K]+     | 3.917 |
| C38H68NO8P   | 1 | 720.45580 | 697.46826 | [M+Na]+    | 2.329 |
| C37H70NO10P  | 1 | 720.47910 | 719.47374 | [M+H]+     | 2.647 |
| C39H74NO7P   | 3 | 720.49240 | 699.52029 | [M-2H+Na]- | 3.543 |
| C39H72NO7P   | 2 | 720.49390 | 697.50464 | [M+Na]+    | 0.051 |
| C41H72NO7P   | 4 | 720.49460 | 721.50464 | [M-H]-     | 3.847 |
| C40H82NO7P   | 1 | 720.58970 | 719.58289 | [M+H]+     | 0.643 |
| C33H55NaO12S | 1 | 721.31990 | 698.33120 | [M+Na]+    | 0.718 |
| C36H58O12    | 1 | 721.35760 | 682.39283 | [M+K]+     | 2.244 |
| C39H71O7P    | 3 | 721.45890 | 682.49374 | [M+K]+     | 2.780 |
| C38H73O10P   | 1 | 721.49810 | 720.49414 | [M+H]+     | 4.586 |
| C38H75O10P   | 2 | 721.50260 | 722.50979 | [M-H]-     | 0.112 |
| C40H75O7P    | 1 | 721.51130 | 698.52504 | [M+Na]+    | 4.109 |
| C40H77O7P    | 1 | 721.51240 | 700.54069 | [M-2H+Na]- | 4.094 |
| C39H76N2O7   | 1 | 721.51240 | 684.56525 | [M-2H+K]-  | 2.015 |
| C45H78O5     | 1 | 721.57110 | 698.58493 | [M+Na]+    | 4.223 |

|              |   |           |           |                        |       |
|--------------|---|-----------|-----------|------------------------|-------|
| C47H76O5     | 1 | 721.58000 | 720.56928 | [M+H] <sup>+</sup>     | 4.787 |
| C34H59NO15   | 1 | 722.39550 | 721.38848 | [M+H] <sup>+</sup>     | 0.339 |
| C40H68NO8P   | 3 | 722.47350 | 721.46826 | [M+H] <sup>+</sup>     | 2.806 |
| C41H72NO7P   | 2 | 722.51030 | 721.50464 | [M+H] <sup>+</sup>     | 2.231 |
| C39H74NO7P   | 1 | 722.51030 | 699.52029 | [M+Na] <sup>+</sup>    | 1.088 |
| C41H74NO7P   | 1 | 722.51450 | 723.52029 | [M-H] <sup>-</sup>     | 2.044 |
| C42H85NO5    | 1 | 722.60600 | 683.64278 | [M+K] <sup>+</sup>     | 0.104 |
| C32H53NaO12S | 1 | 723.27900 | 684.31555 | [M+K] <sup>+</sup>     | 0.419 |
| C37H65O10P   | 2 | 723.42040 | 700.43154 | [M+Na] <sup>+</sup>    | 0.498 |
| C40H68O7P2   | 1 | 723.45170 | 722.44403 | [M+H] <sup>+</sup>     | 0.552 |
| C39H73O7P    | 3 | 723.47320 | 684.50939 | [M+K] <sup>+</sup>     | 0.907 |
| C39H73O8P    | 3 | 723.49580 | 700.50431 | [M+Na] <sup>+</sup>    | 3.138 |
| C41H71O8P    | 4 | 723.49580 | 722.48866 | [M+H] <sup>+</sup>     | 0.178 |
| C50H70O2     | 1 | 723.51040 | 702.53758 | [M-2H+Na] <sup>-</sup> | 2.545 |
| C38H75O10P   | 2 | 723.51700 | 722.50979 | [M+H] <sup>+</sup>     | 0.082 |
| C39H76N2O7   | 2 | 723.52680 | 684.56525 | [M+K] <sup>+</sup>     | 2.217 |
| C44H76O5     | 1 | 723.53110 | 684.56928 | [M+K] <sup>+</sup>     | 1.833 |
| C39H79O9P    | 1 | 723.55110 | 722.54617 | [M+H] <sup>+</sup>     | 3.240 |
| C47H78O5     | 1 | 723.59540 | 722.58493 | [M+H] <sup>+</sup>     | 4.428 |
| C49H80O2     | 1 | 723.60480 | 700.61583 | [M+Na] <sup>+</sup>    | 0.348 |
| C38H72NO7P   | 1 | 724.47090 | 685.50464 | [M+K] <sup>+</sup>     | 4.290 |
| C40H70NO8P   | 6 | 724.48990 | 723.48391 | [M+H] <sup>+</sup>     | 1.763 |
| C38H72NO8P   | 2 | 724.48990 | 701.49956 | [M+Na] <sup>+</sup>    | 1.549 |
| C39H76NO7P   | 1 | 724.52330 | 701.53594 | [M+Na] <sup>+</sup>    | 2.573 |
| C41H73NO9    | 1 | 724.53840 | 723.52854 | [M+H] <sup>+</sup>     | 3.582 |
| C40H80NO6P   | 1 | 724.56340 | 701.57233 | [M+Na] <sup>+</sup>    | 2.555 |
| C36H52O15    | 1 | 725.33500 | 724.33063 | [M+H] <sup>+</sup>     | 3.993 |
| C35H65O13P   | 1 | 725.42250 | 724.41628 | [M+H] <sup>+</sup>     | 1.453 |
| C37H67O10P   | 1 | 725.43330 | 702.44719 | [M+Na] <sup>+</sup>    | 4.287 |
| C39H75O7P    | 1 | 725.48550 | 686.52504 | [M+K] <sup>+</sup>     | 3.713 |
| C38H75N2O6P  | 2 | 725.50200 | 686.53628 | [M+K] <sup>+</sup>     | 3.548 |
| C41H73O8P    | 1 | 725.51460 | 724.50431 | [M+H] <sup>+</sup>     | 4.164 |
| C50H70O2     | 1 | 725.52380 | 702.53758 | [M+Na] <sup>+</sup>    | 4.138 |
| C40H79O7P    | 1 | 725.54890 | 702.55634 | [M+Na] <sup>+</sup>    | 4.597 |
| C44H78O5     | 1 | 725.54890 | 686.58493 | [M+K] <sup>+</sup>     | 1.136 |
| C39H79N2O6P  | 1 | 725.55550 | 702.56758 | [M+Na] <sup>+</sup>    | 1.788 |
| C37H70NO9P   | 2 | 726.46600 | 703.47882 | [M+Na] <sup>+</sup>    | 2.812 |
| C38H74NO7P   | 3 | 726.48610 | 687.52029 | [M+K] <sup>+</sup>     | 3.657 |
| C40H72NO8P   | 6 | 726.50560 | 725.49956 | [M+H] <sup>+</sup>     | 1.689 |
| C38H74NO8P   | 1 | 726.50560 | 703.51521 | [M+Na] <sup>+</sup>    | 1.612 |
| C39H78NO7P   | 2 | 726.53780 | 703.55159 | [M+Na] <sup>+</sup>    | 4.148 |
| C41H76NO7P   | 2 | 726.54620 | 725.53594 | [M+H] <sup>+</sup>     | 4.111 |
| C42H80NO6P   | 2 | 726.57730 | 725.57233 | [M+H] <sup>+</sup>     | 3.163 |
| C39H61O8P    | 1 | 727.37400 | 688.41041 | [M+K] <sup>+</sup>     | 0.606 |
| C40H65O8P    | 1 | 727.43420 | 704.44171 | [M+Na] <sup>+</sup>    | 4.495 |
| C40H67O8P    | 1 | 727.43460 | 706.45736 | [M-2H+Na] <sup>-</sup> | 3.548 |
| C37H71O9P    | 1 | 727.43460 | 690.48357 | [M-2H+K] <sup>-</sup>  | 3.335 |
| C35H67O13P   | 1 | 727.44230 | 726.43193 | [M+H] <sup>+</sup>     | 4.256 |
| C37H69O10P   | 1 | 727.44930 | 704.46284 | [M+Na] <sup>+</sup>    | 3.794 |
| C39H67O10P   | 1 | 727.45780 | 726.44719 | [M+H] <sup>+</sup>     | 4.593 |
| C38H73O9P    | 4 | 727.48500 | 704.49922 | [M+Na] <sup>+</sup>    | 4.735 |
| C40H71O9P    | 1 | 727.49370 | 726.48357 | [M+H] <sup>+</sup>     | 3.926 |
| C38H77N2O6P  | 1 | 727.51860 | 688.55193 | [M+K] <sup>+</sup>     | 4.844 |

|             |   |           |           |            |       |
|-------------|---|-----------|-----------|------------|-------|
| C39H77O8P   | 4 | 727.52220 | 704.53561 | [M+Na]+    | 3.615 |
| C41H75O8P   | 4 | 727.52410 | 726.51996 | [M+H]+     | 4.301 |
| C40H81O7P   | 1 | 727.56460 | 704.57199 | [M+Na]+    | 4.653 |
| C47H76O4    | 1 | 727.56460 | 704.57436 | [M+Na]+    | 1.399 |
| C44H80O5    | 1 | 727.56460 | 688.60058 | [M+K]+     | 1.201 |
| C49H74O4    | 2 | 727.56490 | 726.55871 | [M+H]+     | 1.486 |
| C41H79N2O6P | 1 | 727.57660 | 726.56758 | [M+H]+     | 2.411 |
| C36H68NO10P | 1 | 728.44390 | 705.45809 | [M+Na]+    | 4.678 |
| C38H66NO10P | 2 | 728.45150 | 727.44244 | [M+H]+     | 2.461 |
| C37H74NO8P  | 1 | 728.46500 | 691.51521 | [M-2H+K]-  | 1.636 |
| C37H72NO9P  | 1 | 728.48370 | 705.49447 | [M+Na]+    | 0.008 |
| C37H74NO9P  | 1 | 728.48660 | 707.51012 | [M-2H+Na]- | 2.494 |
| C39H72NO9P  | 1 | 728.48660 | 729.49447 | [M-H]-     | 0.828 |
| C40H76NO8P  | 1 | 728.52270 | 729.53086 | [M-H]-     | 1.219 |
| C40H74NO8P  | 4 | 728.52590 | 727.51521 | [M+H]+     | 4.697 |
| C39H82NO6P  | 1 | 728.53790 | 691.58798 | [M-2H+K]-  | 1.815 |
| C40H84NO6P  | 1 | 728.59140 | 705.60363 | [M+Na]+    | 1.989 |
| C42H82NO6P  | 1 | 728.59700 | 727.58798 | [M+H]+     | 2.405 |
| C36H67O10P  | 2 | 729.41100 | 690.44719 | [M+K]+     | 0.906 |
| C40H67O8P   | 3 | 729.44820 | 706.45736 | [M+Na]+    | 2.221 |
| C39H69O10P  | 3 | 729.46750 | 728.46284 | [M+H]+     | 3.577 |
| C37H71O10P  | 5 | 729.46750 | 706.47849 | [M+Na]+    | 0.288 |
| C41H71O7P   | 2 | 729.48210 | 706.49374 | [M+Na]+    | 1.186 |
| C38H75O9P   | 1 | 729.50170 | 706.51487 | [M+Na]+    | 3.283 |
| C38H77O9P   | 1 | 729.50820 | 708.53052 | [M-2H+Na]- | 4.134 |
| C40H75O9P   | 1 | 729.50820 | 730.51487 | [M-H]-     | 0.817 |
| C47H68O6    | 2 | 729.51130 | 728.50160 | [M+H]+     | 3.331 |
| C39H79O7P   | 2 | 729.52020 | 690.55634 | [M+K]+     | 0.968 |
| C38H79N2O6P | 3 | 729.53400 | 690.56758 | [M+K]+     | 4.488 |
| C42H81O7P   | 2 | 729.58220 | 728.57199 | [M+H]+     | 4.024 |
| C44H82O5    | 2 | 729.58220 | 690.61623 | [M+K]+     | 3.871 |
| C45H86O5    | 1 | 729.63520 | 706.64753 | [M+Na]+    | 2.122 |
| C49H86O2    | 1 | 729.65420 | 706.66278 | [M+Na]+    | 3.012 |
| C33H57NO15  | 1 | 730.36160 | 707.37283 | [M+Na]+    | 0.611 |
| C35H66NO10P | 1 | 730.40560 | 691.44244 | [M+K]+     | 0.018 |
| C36H70NO9P  | 2 | 730.44120 | 691.47882 | [M+K]+     | 1.057 |
| C39H66NO8P  | 1 | 730.44120 | 707.45261 | [M+Na]+    | 0.860 |
| C42H59N5O6  | 1 | 730.45220 | 729.44654 | [M+H]+     | 2.197 |
| C36H70NO10P | 4 | 730.46020 | 707.47374 | [M+Na]+    | 3.776 |
| C38H68NO10P | 1 | 730.46860 | 729.45809 | [M+H]+     | 4.440 |
| C37H74NO9P  | 2 | 730.50070 | 707.51012 | [M+Na]+    | 1.856 |
| C39H72NO9P  | 3 | 730.50070 | 729.49447 | [M+H]+     | 1.428 |
| C39H74NO9P  | 1 | 730.50310 | 731.51012 | [M-H]-     | 0.338 |
| C40H78NO8P  | 1 | 730.53960 | 731.54651 | [M-H]-     | 0.496 |
| C40H76NO8P  | 4 | 730.53990 | 729.53086 | [M+H]+     | 2.426 |
| C42H83NO8   | 1 | 730.61580 | 729.61187 | [M+H]+     | 4.571 |
| C40H69O8P   | 2 | 731.46550 | 708.47301 | [M+Na]+    | 4.470 |
| C37H73O9P   | 2 | 731.46550 | 692.49922 | [M+K]+     | 4.274 |
| C42H67O8P   | 4 | 731.46550 | 730.45736 | [M+H]+     | 1.191 |
| C37H73O8PS  | 4 | 731.46550 | 708.47638 | [M+Na]+    | 0.139 |
| C39H71O10P  | 6 | 731.48380 | 730.47849 | [M+H]+     | 2.678 |
| C37H73O10P  | 6 | 731.48380 | 708.49414 | [M+Na]+    | 0.602 |
| C46H66O7    | 5 | 731.48480 | 730.48086 | [M+H]+     | 4.547 |

|             |   |           |           |            |       |
|-------------|---|-----------|-----------|------------|-------|
| C39H73O10P  | 1 | 731.48820 | 732.49414 | [M-H]-     | 1.820 |
| C41H73O7P   | 1 | 731.50180 | 708.50939 | [M+Na]+    | 4.354 |
| C43H73O7P   | 1 | 731.50550 | 732.50939 | [M-H]-     | 4.615 |
| C45H74O5    | 1 | 731.50550 | 694.55363 | [M-2H+K]-  | 4.476 |
| C38H77O9P   | 1 | 731.51770 | 708.53052 | [M+Na]+    | 2.796 |
| C41H79O8P   | 2 | 731.56040 | 730.55126 | [M+H]+     | 2.558 |
| C45H88O5    | 1 | 731.65040 | 708.66318 | [M+Na]+    | 2.731 |
| C49H88O2    | 1 | 731.66850 | 708.67843 | [M+Na]+    | 1.158 |
| C46H92O3    | 1 | 731.66850 | 692.70465 | [M+K]+     | 0.961 |
| C41H66NO8P  | 3 | 732.45640 | 731.45261 | [M+H]+     | 4.747 |
| C36H72NO9P  | 4 | 732.45640 | 693.49447 | [M+K]+     | 1.670 |
| C38H72NO10P | 1 | 732.48220 | 733.48939 | [M-H]-     | 0.112 |
| C39H74NO9P  | 3 | 732.51790 | 731.51012 | [M+H]+     | 0.692 |
| C39H76NO9P  | 1 | 732.51830 | 733.52577 | [M-H]-     | 0.277 |
| C45H75NO4   | 1 | 732.52980 | 693.56961 | [M+K]+     | 4.041 |
| C43H74NO6P  | 1 | 732.52980 | 731.52538 | [M+H]+     | 3.888 |
| C40H78NO8P  | 4 | 732.55570 | 731.54651 | [M+H]+     | 2.624 |
| C46H73N3O4  | 1 | 732.56420 | 731.56011 | [M+H]+     | 4.337 |
| C41H82NO7P  | 1 | 732.58790 | 731.58289 | [M+H]+     | 3.089 |
| C36H71O10P  | 1 | 733.44050 | 694.47849 | [M+K]+     | 1.553 |
| C47H68O5    | 1 | 733.48310 | 712.50668 | [M-2H+Na]- | 2.405 |
| C42H71O8P   | 1 | 733.48310 | 734.48866 | [M-H]-     | 2.333 |
| C39H73O10P  | 1 | 733.50290 | 732.49414 | [M+H]+     | 2.033 |
| C39H75O10P  | 2 | 733.50320 | 734.50979 | [M-H]-     | 0.928 |
| C41H75O7P   | 2 | 733.51650 | 710.52504 | [M+Na]+    | 3.047 |
| C43H73O7P   | 1 | 733.51650 | 732.50939 | [M+H]+     | 0.224 |
| C41H77O7P   | 2 | 733.51760 | 712.54069 | [M-2H+Na]- | 3.062 |
| C45H76O5    | 2 | 733.51760 | 696.56928 | [M-2H+K]-  | 0.376 |
| C43H75O7P   | 2 | 733.51760 | 734.52504 | [M-H]-     | 0.237 |
| C42H85O7P   | 1 | 733.61300 | 732.60329 | [M+H]+     | 3.321 |
| C44H86O5    | 1 | 733.61300 | 694.64753 | [M+K]+     | 3.167 |
| C47H88O5    | 1 | 733.67330 | 732.66318 | [M+H]+     | 3.889 |
| C38H66NO8P  | 3 | 734.41490 | 695.45261 | [M+K]+     | 1.167 |
| C39H70NO7P  | 3 | 734.45220 | 695.48899 | [M+K]+     | 0.079 |
| C41H68NO8P  | 4 | 734.47200 | 733.46826 | [M+H]+     | 4.802 |
| C40H75NO8   | 1 | 734.49550 | 697.54927 | [M-2H+K]-  | 3.227 |
| C38H74NO10P | 1 | 734.49550 | 735.50504 | [M-H]-     | 3.088 |
| C38H72NO10P | 5 | 734.49850 | 733.48939 | [M+H]+     | 2.508 |
| C40H76NO7P  | 2 | 734.50880 | 713.53594 | [M-2H+Na]- | 2.455 |
| C39H76NO9P  | 3 | 734.53080 | 733.52577 | [M+H]+     | 3.054 |
| C40H80NO8P  | 4 | 734.57150 | 733.56216 | [M+H]+     | 2.821 |
| C36H56O14   | 1 | 735.35450 | 712.36701 | [M+Na]+    | 2.355 |
| C38H65O10P  | 3 | 735.42170 | 712.43154 | [M+Na]+    | 1.278 |
| C46H64O6    | 2 | 735.45730 | 712.47029 | [M+Na]+    | 3.008 |
| C42H71O8P   | 2 | 735.49350 | 734.48866 | [M+H]+     | 3.303 |
| C39H75O10P  | 2 | 735.51380 | 734.50979 | [M+H]+     | 4.431 |
| C45H76O5    | 2 | 735.52890 | 696.56928 | [M+K]+     | 4.794 |
| C43H75O7P   | 2 | 735.52890 | 734.52504 | [M+H]+     | 4.642 |
| C41H77O7P   | 2 | 735.52890 | 712.54069 | [M+Na]+    | 1.380 |
| C51H90O2    | 2 | 735.70500 | 734.69408 | [M+H]+     | 4.959 |
| C39H72NO7P  | 2 | 736.46690 | 697.50464 | [M+K]+     | 1.211 |
| C41H70NO8P  | 3 | 736.48920 | 735.48391 | [M+H]+     | 2.684 |
| C39H78NO9P  | 1 | 736.54870 | 735.54142 | [M+H]+     | 0.010 |

|              |   |           |           |            |       |
|--------------|---|-----------|-----------|------------|-------|
| C33H55NaO13S | 1 | 737.31220 | 714.32611 | [M+Na]+    | 4.249 |
| C40H75O7P    | 3 | 737.49130 | 698.52504 | [M+K]+     | 4.212 |
| C40H75O8P    | 1 | 737.50610 | 714.51996 | [M+Na]+    | 4.176 |
| C39H77O10P   | 1 | 737.53020 | 736.52544 | [M+H]+     | 3.402 |
| C41H72N2O9   | 1 | 737.53020 | 736.52378 | [M+H]+     | 1.158 |
| C45H78O5     | 1 | 737.54620 | 698.58493 | [M+K]+     | 2.544 |
| C43H77O7P    | 2 | 737.54620 | 736.54069 | [M+H]+     | 2.392 |
| C41H79O7P    | 2 | 737.54620 | 714.55634 | [M+Na]+    | 0.861 |
| C40H81O9P    | 1 | 737.56550 | 736.56182 | [M+H]+     | 4.873 |
| C50H82O      | 2 | 737.59940 | 698.63657 | [M+K]+     | 0.428 |
| C47H92O5     | 2 | 737.69950 | 736.69448 | [M+H]+     | 3.046 |
| C37H66NO10P  | 1 | 738.43480 | 715.44244 | [M+Na]+    | 4.255 |
| C39H74NO7P   | 3 | 738.48080 | 699.52029 | [M+K]+     | 3.579 |
| C41H72NO8P   | 6 | 738.50560 | 737.49956 | [M+H]+     | 1.661 |
| C39H74NO8P   | 1 | 738.50560 | 715.51521 | [M+Na]+    | 1.586 |
| C40H77NO8    | 2 | 738.52580 | 699.56492 | [M+K]+     | 3.074 |
| C40H78NO7P   | 1 | 738.54180 | 715.55159 | [M+Na]+    | 1.335 |
| C42H76NO7P   | 2 | 738.54440 | 737.53594 | [M+H]+     | 1.607 |
| C40H67O10P   | 3 | 739.45200 | 738.44719 | [M+H]+     | 3.325 |
| C40H66O12    | 1 | 739.46530 | 738.45543 | [M+H]+     | 3.515 |
| C37H71O12P   | 1 | 739.47620 | 738.46832 | [M+H]+     | 0.826 |
| C39H73O9P    | 2 | 739.48890 | 716.49922 | [M+Na]+    | 0.615 |
| C46H68O6     | 2 | 739.49280 | 716.50159 | [M+Na]+    | 2.688 |
| C42H75O8P    | 2 | 739.52400 | 738.51996 | [M+H]+     | 4.366 |
| C47H72O5     | 2 | 739.52400 | 716.53798 | [M+Na]+    | 4.323 |
| C40H77O8P    | 2 | 739.52400 | 716.53561 | [M+Na]+    | 1.122 |
| C41H80O8     | 1 | 739.54730 | 700.58532 | [M+K]+     | 1.583 |
| C37H68NO10P  | 1 | 740.44400 | 717.45809 | [M+Na]+    | 4.468 |
| C39H66NO10P  | 1 | 740.45120 | 739.44244 | [M+H]+     | 2.016 |
| C38H72NO9P   | 4 | 740.48130 | 717.49447 | [M+Na]+    | 3.233 |
| C40H70NO9P   | 3 | 740.48950 | 739.47882 | [M+H]+     | 4.602 |
| C39H76NO7P   | 1 | 740.49870 | 701.53594 | [M+K]+     | 0.531 |
| C39H76NO8P   | 1 | 740.52130 | 717.53086 | [M+Na]+    | 1.649 |
| C41H74NO8P   | 6 | 740.52130 | 739.51521 | [M+H]+     | 1.591 |
| C39H78NO8P   | 1 | 740.52410 | 719.54651 | [M-2H+Na]- | 3.959 |
| C41H76NO8P   | 1 | 740.52410 | 741.53086 | [M-H]-     | 0.691 |
| C40H80NO6P   | 1 | 740.53480 | 701.57233 | [M+K]+     | 0.916 |
| C40H79NO8    | 3 | 740.54200 | 701.58057 | [M+K]+     | 2.323 |
| C40H80NO7P   | 1 | 740.55470 | 717.56724 | [M+Na]+    | 2.382 |
| C42H78NO7P   | 2 | 740.56090 | 739.55159 | [M+H]+     | 2.751 |
| C43H65O8P    | 2 | 741.44620 | 740.44171 | [M+H]+     | 3.748 |
| C41H67O8P    | 1 | 741.44790 | 718.45736 | [M+Na]+    | 1.780 |
| C36H69O13P   | 1 | 741.45490 | 740.44758 | [M+H]+     | 0.062 |
| C40H69O10P   | 5 | 741.46740 | 740.46284 | [M+H]+     | 3.654 |
| C38H71O10P   | 4 | 741.46740 | 718.47849 | [M+Na]+    | 0.418 |
| C39H75O8P    | 3 | 741.48190 | 702.51996 | [M+K]+     | 1.631 |
| C37H73O12P   | 2 | 741.49130 | 740.48397 | [M+H]+     | 0.082 |
| C50H70O2     | 3 | 741.49960 | 702.53758 | [M+K]+     | 1.525 |
| C39H75O9P    | 2 | 741.50190 | 718.51487 | [M+Na]+    | 2.960 |
| C43H74O7     | 3 | 741.50600 | 702.54346 | [M+K]+     | 0.817 |
| C40H79O8P    | 1 | 741.53830 | 718.55126 | [M+Na]+    | 2.940 |
| C47H74O5     | 1 | 741.54070 | 718.55363 | [M+Na]+    | 2.895 |
| C42H77O8P    | 3 | 741.54550 | 740.53561 | [M+H]+     | 3.535 |

|             |   |           |           |            |       |
|-------------|---|-----------|-----------|------------|-------|
| C51H74O2    | 1 | 741.55940 | 718.56888 | [M+Na]+    | 1.750 |
| C41H83O7P   | 1 | 741.58020 | 718.58764 | [M+Na]+    | 4.497 |
| C43H81O7P   | 1 | 741.58020 | 740.57199 | [M+H]+     | 1.262 |
| C46H86O5    | 1 | 741.63330 | 718.64753 | [M+Na]+    | 4.649 |
| C39H68NO10P | 3 | 742.46690 | 741.45809 | [M+H]+     | 2.078 |
| C38H74NO9P  | 1 | 742.50070 | 719.51012 | [M+Na]+    | 1.826 |
| C40H72NO9P  | 2 | 742.50070 | 741.49447 | [M+H]+     | 1.405 |
| C38H76NO9P  | 1 | 742.50210 | 721.52577 | [M-2H+Na]- | 2.245 |
| C40H74NO9P  | 1 | 742.50210 | 743.51012 | [M-H]-     | 1.014 |
| C41H78NO8P  | 2 | 742.53870 | 743.54651 | [M-H]-     | 0.725 |
| C41H76NO8P  | 2 | 742.54150 | 741.53086 | [M+H]+     | 4.541 |
| C42H80NO7P  | 1 | 742.57650 | 741.56724 | [M+H]+     | 2.676 |
| C42H79NO9   | 1 | 742.57960 | 741.57549 | [M+H]+     | 4.249 |
| C41H86NO6P  | 2 | 742.60610 | 719.61928 | [M+Na]+    | 3.231 |
| C41H69O7P   | 2 | 743.44110 | 704.47809 | [M+K]+     | 0.194 |
| C41H69O8P   | 3 | 743.46020 | 720.47301 | [M+Na]+    | 2.730 |
| C43H67O8P   | 2 | 743.46290 | 742.45736 | [M+H]+     | 2.326 |
| C40H71O10P  | 6 | 743.48330 | 742.47849 | [M+H]+     | 3.307 |
| C38H73O10P  | 5 | 743.48330 | 720.49414 | [M+Na]+    | 0.081 |
| C39H77O9P   | 2 | 743.51820 | 720.53052 | [M+Na]+    | 2.078 |
| C47H76O4    | 1 | 743.53380 | 704.57436 | [M+K]+     | 4.991 |
| C40H81O7P   | 3 | 743.53410 | 704.57199 | [M+K]+     | 1.404 |
| C39H81N2O6P | 2 | 743.54680 | 704.58323 | [M+K]+     | 0.570 |
| C43H83O7P   | 2 | 743.59650 | 742.58764 | [M+H]+     | 2.133 |
| C45H84O5    | 2 | 743.59650 | 704.63188 | [M+K]+     | 1.982 |
| C46H88O5    | 1 | 743.65200 | 720.66318 | [M+Na]+    | 0.535 |
| C48H96O2    | 1 | 743.70680 | 704.74103 | [M+K]+     | 3.520 |
| C48H96O3    | 2 | 743.72550 | 720.73595 | [M+Na]+    | 0.446 |
| C34H59NO14  | 1 | 744.35850 | 705.39356 | [M+K]+     | 2.405 |
| C36H68NO10P | 1 | 744.42070 | 705.45809 | [M+K]+     | 0.721 |
| C37H72NO9P  | 1 | 744.45420 | 705.49447 | [M+K]+     | 4.598 |
| C40H68NO8P  | 3 | 744.45950 | 721.46826 | [M+Na]+    | 2.716 |
| C37H72NO10P | 2 | 744.47510 | 721.48939 | [M+Na]+    | 4.713 |
| C41H74NO7P  | 1 | 744.49690 | 723.52029 | [M-2H+Na]- | 2.615 |
| C43H72NO7P  | 1 | 744.49690 | 745.50464 | [M-H]-     | 0.634 |
| C38H76NO9P  | 1 | 744.51170 | 721.52577 | [M+Na]+    | 4.424 |
| C40H76NO9P  | 1 | 744.51850 | 745.52577 | [M-H]-     | 0.004 |
| C40H74NO9P  | 1 | 744.52050 | 743.51012 | [M+H]+     | 4.173 |
| C39H80NO7P  | 1 | 744.53390 | 705.56724 | [M+K]+     | 4.710 |
| C41H78NO8P  | 5 | 744.55580 | 743.54651 | [M+H]+     | 2.716 |
| C41H80NO8P  | 1 | 744.55620 | 745.56216 | [M-H]-     | 1.762 |
| C42H82NO7P  | 1 | 744.59180 | 743.58289 | [M+H]+     | 2.199 |
| C40H68O7P2  | 1 | 745.43390 | 722.44403 | [M+Na]+    | 0.869 |
| C41H71O7P   | 1 | 745.45830 | 706.49374 | [M+K]+     | 1.886 |
| C46H64O8    | 2 | 745.46840 | 744.46012 | [M+H]+     | 1.354 |
| C38H75O9P   | 4 | 745.47450 | 706.51487 | [M+K]+     | 4.727 |
| C41H71O8P   | 2 | 745.47450 | 722.48866 | [M+Na]+    | 4.534 |
| C43H69O8P   | 3 | 745.48270 | 744.47301 | [M+H]+     | 3.248 |
| C40H75O10P  | 2 | 745.50040 | 746.50979 | [M-H]-     | 2.842 |
| C38H75O10P  | 3 | 745.50150 | 722.50979 | [M+Na]+    | 3.340 |
| C40H73O10P  | 5 | 745.50150 | 744.49414 | [M+H]+     | 0.122 |
| C47H70O7    | 1 | 745.50370 | 746.51210 | [M-H]-     | 1.516 |
| C41H77O9P   | 1 | 745.53960 | 744.53052 | [M+H]+     | 2.422 |

|             |   |           |           |                        |       |
|-------------|---|-----------|-----------|------------------------|-------|
| C42H81O8P   | 1 | 745.57660 | 744.56691 | [M+H] <sup>+</sup>     | 3.247 |
| C42H85N2O6P | 1 | 745.62190 | 744.61453 | [M+H] <sup>+</sup>     | 0.139 |
| C46H90O5    | 1 | 745.66540 | 722.67883 | [M+Na] <sup>+</sup>    | 3.551 |
| C37H74NO9P  | 3 | 746.47210 | 707.51012 | [M+K] <sup>+</sup>     | 1.571 |
| C39H74NO10P | 1 | 746.49690 | 747.50504 | [M-H] <sup>-</sup>     | 1.163 |
| C41H74NO7P  | 2 | 746.51170 | 723.52029 | [M+Na] <sup>+</sup>    | 2.928 |
| C43H72NO7P  | 1 | 746.51170 | 745.50464 | [M+H] <sup>+</sup>     | 0.284 |
| C41H73NO9   | 1 | 746.51580 | 723.52854 | [M+Na] <sup>+</sup>    | 2.620 |
| C41H80NO8P  | 2 | 746.57280 | 745.56216 | [M+H] <sup>+</sup>     | 4.517 |
| C36H52O15   | 1 | 747.32130 | 724.33063 | [M+Na] <sup>+</sup>    | 1.944 |
| C35H65O13P  | 1 | 747.40570 | 724.41628 | [M+Na] <sup>+</sup>    | 0.261 |
| C41H73O7P   | 1 | 747.47490 | 708.50939 | [M+K] <sup>+</sup>     | 3.152 |
| C46H66O8    | 3 | 747.48020 | 746.47577 | [M+H] <sup>+</sup>     | 3.801 |
| C38H77O9P   | 1 | 747.49120 | 708.53052 | [M+K] <sup>+</sup>     | 3.310 |
| C41H73O8P   | 1 | 747.49120 | 724.50431 | [M+Na] <sup>+</sup>    | 3.117 |
| C43H70O10   | 1 | 747.50050 | 746.49690 | [M+H] <sup>+</sup>     | 4.911 |
| C40H77O10P  | 2 | 747.51880 | 748.52544 | [M-H] <sup>-</sup>     | 0.844 |
| C46H78O5    | 2 | 747.53050 | 710.58493 | [M-2H+K] <sup>-</sup>  | 4.048 |
| C49H74O4    | 2 | 747.53050 | 726.55871 | [M-2H+Na] <sup>-</sup> | 3.841 |
| C49H88O2    | 1 | 747.64410 | 708.67843 | [M+K] <sup>+</sup>     | 3.368 |
| C38H64NO10P | 2 | 748.41800 | 725.42679 | [M+Na] <sup>+</sup>    | 2.662 |
| C42H70NO8P  | 5 | 748.48780 | 747.48391 | [M+H] <sup>+</sup>     | 4.512 |
| C39H74NO10P | 1 | 748.51070 | 747.50504 | [M+H] <sup>+</sup>     | 2.148 |
| C41H78NO7P  | 3 | 748.52400 | 727.55159 | [M-2H+Na] <sup>-</sup> | 3.010 |
| C43H76NO7P  | 2 | 748.52890 | 749.53594 | [M-H] <sup>-</sup>     | 0.303 |
| C41H75NO9   | 2 | 748.53150 | 725.54419 | [M+Na] <sup>+</sup>    | 2.546 |
| C40H78NO9P  | 2 | 748.54510 | 747.54142 | [M+H] <sup>+</sup>     | 4.800 |
| C42H80NO6P  | 1 | 748.55800 | 725.57233 | [M+Na] <sup>+</sup>    | 4.741 |
| C41H82NO8P  | 1 | 748.58240 | 747.57781 | [M+H] <sup>+</sup>     | 3.577 |
| C42H86NO7P  | 1 | 748.61830 | 747.61419 | [M+H] <sup>+</sup>     | 4.225 |
| C39H67O10P  | 3 | 749.43390 | 726.44719 | [M+Na] <sup>+</sup>    | 3.349 |
| C40H71O9P   | 2 | 749.47260 | 726.48357 | [M+Na] <sup>+</sup>    | 0.260 |
| C41H75O7P   | 4 | 749.49130 | 710.52504 | [M+K] <sup>+</sup>     | 4.144 |
| C43H73O8P   | 1 | 749.51100 | 748.50431 | [M+H] <sup>+</sup>     | 0.773 |
| C40H79O10P  | 1 | 749.53250 | 750.54109 | [M-H] <sup>-</sup>     | 1.760 |
| C40H77O10P  | 1 | 749.53370 | 748.52544 | [M+H] <sup>+</sup>     | 1.322 |
| C46H78O5    | 2 | 749.54810 | 710.58493 | [M+K] <sup>+</sup>     | 0.032 |
| C49H74O4    | 1 | 749.55010 | 726.55871 | [M+Na] <sup>+</sup>    | 2.892 |
| C47H82O5    | 1 | 749.60760 | 726.61623 | [M+Na] <sup>+</sup>    | 2.872 |
| C38H66NO10P | 2 | 750.42890 | 727.44244 | [M+Na] <sup>+</sup>    | 3.675 |
| C42H72NO8P  | 3 | 750.50830 | 749.49956 | [M+H] <sup>+</sup>     | 1.963 |
| C39H76NO10P | 1 | 750.53110 | 749.52069 | [M+H] <sup>+</sup>     | 4.186 |
| C42H81NO7   | 1 | 750.56080 | 711.60131 | [M+K] <sup>+</sup>     | 4.870 |
| C40H80NO9P  | 1 | 750.56080 | 749.55707 | [M+H] <sup>+</sup>     | 4.720 |
| C42H75N3O8  | 2 | 750.56080 | 749.55542 | [M+H] <sup>+</sup>     | 2.514 |
| C42H82NO6P  | 1 | 750.57830 | 727.58798 | [M+Na] <sup>+</sup>    | 1.467 |
| C44H89NO5   | 1 | 750.63370 | 711.67408 | [M+K] <sup>+</sup>     | 4.696 |
| C37H67O13P  | 1 | 751.43750 | 750.43193 | [M+H] <sup>+</sup>     | 2.268 |
| C39H69O10P  | 3 | 751.44970 | 728.46284 | [M+Na] <sup>+</sup>    | 3.141 |
| C40H73O8P   | 1 | 751.46990 | 712.50431 | [M+K] <sup>+</sup>     | 3.248 |
| C47H68O5    | 1 | 751.46990 | 712.50668 | [M+K] <sup>+</sup>     | 0.098 |
| C47H68O6    | 1 | 751.48730 | 728.50160 | [M+Na] <sup>+</sup>    | 4.685 |
| C40H73O9P   | 1 | 751.48730 | 728.49922 | [M+Na] <sup>+</sup>    | 1.524 |



|             |   |           |           |           |       |
|-------------|---|-----------|-----------|-----------|-------|
| C41H77O7P   | 1 | 751.50230 | 712.54069 | [M+K]+    | 2.055 |
| C41H77O8P   | 1 | 751.52260 | 728.53561 | [M+Na]+   | 2.967 |
| C43H75O8P   | 1 | 751.53030 | 750.51996 | [M+H]+    | 4.086 |
| C40H79O10P  | 2 | 751.54860 | 750.54109 | [M+H]+    | 0.321 |
| C46H80O5    | 1 | 751.56730 | 712.60058 | [M+K]+    | 4.755 |
| C41H81N2O6P | 1 | 751.57590 | 728.58323 | [M+Na]+   | 4.594 |
| C41H83O9P   | 2 | 751.58130 | 750.57747 | [M+H]+    | 4.582 |
| C47H84O5    | 2 | 751.61770 | 728.63188 | [M+Na]+   | 4.520 |
| C37H64NO10P | 1 | 752.39150 | 713.42679 | [M+K]+    | 2.077 |
| C42H59N5O6  | 1 | 752.43260 | 729.44654 | [M+Na]+   | 4.194 |
| C38H68NO10P | 1 | 752.44540 | 729.45809 | [M+Na]+   | 2.536 |
| C40H66NO10P | 4 | 752.45320 | 751.44244 | [M+H]+    | 4.642 |
| C39H72NO8P  | 1 | 752.46320 | 713.49956 | [M+K]+    | 0.655 |
| C39H72NO9P  | 1 | 752.48290 | 729.49447 | [M+Na]+   | 1.055 |
| C43H72NO6P  | 2 | 752.50220 | 729.50973 | [M+Na]+   | 4.322 |
| C40H76NO8P  | 2 | 752.52220 | 729.53086 | [M+Na]+   | 2.819 |
| C42H74NO8P  | 6 | 752.52220 | 751.51521 | [M+H]+    | 0.369 |
| C43H78NO7P  | 1 | 752.55740 | 751.55159 | [M+H]+    | 1.944 |
| C41H80NO7P  | 1 | 752.55740 | 729.56724 | [M+Na]+   | 1.244 |
| C41H63O8P   | 1 | 753.39020 | 714.42606 | [M+K]+    | 1.315 |
| C37H69O13P  | 1 | 753.45390 | 752.44758 | [M+H]+    | 1.266 |
| C41H69O10P  | 4 | 753.46640 | 752.46284 | [M+H]+    | 4.923 |
| C40H75O8P   | 1 | 753.48070 | 714.51996 | [M+K]+    | 3.197 |
| C40H75O9P   | 3 | 753.50130 | 730.51487 | [M+Na]+   | 3.709 |
| C42H73O9P   | 1 | 753.50440 | 752.49922 | [M+H]+    | 2.779 |
| C43H77O8P   | 1 | 753.54150 | 752.53561 | [M+H]+    | 1.830 |
| C41H79O8P   | 1 | 753.54150 | 730.55126 | [M+Na]+   | 1.354 |
| C41H83N2O6P | 1 | 753.58720 | 730.59888 | [M+Na]+   | 1.190 |
| C47H86O5    | 1 | 753.63670 | 730.64753 | [M+Na]+   | 0.064 |
| C40H68NO10P | 1 | 754.46370 | 753.45809 | [M+H]+    | 2.196 |
| C38H70NO10P | 1 | 754.46370 | 731.47374 | [M+Na]+   | 0.983 |
| C39H74NO9P  | 2 | 754.49990 | 731.51012 | [M+Na]+   | 0.737 |
| C43H74NO6P  | 2 | 754.51530 | 731.52538 | [M+Na]+   | 0.929 |
| C40H78NO7P  | 2 | 754.51530 | 715.55159 | [M+K]+    | 0.738 |
| C40H78NO8P  | 1 | 754.53810 | 731.54651 | [M+Na]+   | 3.142 |
| C42H76NO8P  | 5 | 754.53810 | 753.53086 | [M+H]+    | 0.037 |
| C43H80NO7P  | 1 | 754.57720 | 753.56724 | [M+H]+    | 3.561 |
| C44H84NO6P  | 2 | 754.60870 | 753.60363 | [M+H]+    | 2.913 |
| C42H86NO6P  | 3 | 754.60870 | 731.61928 | [M+Na]+   | 0.266 |
| C40H53NaO8S | 1 | 755.30230 | 716.33589 | [M+K]+    | 4.317 |
| C46H68O6    | 1 | 755.46790 | 716.50159 | [M+K]+    | 4.182 |
| C37H71O13P  | 3 | 755.47110 | 754.46323 | [M+H]+    | 0.789 |
| C41H71O10P  | 5 | 755.48390 | 754.47849 | [M+H]+    | 2.461 |
| C39H73O10P  | 5 | 755.48390 | 732.49414 | [M+Na]+   | 0.715 |
| C38H75O12P  | 4 | 755.50790 | 754.49962 | [M+H]+    | 1.338 |
| C43H79O8P   | 2 | 755.55500 | 754.55126 | [M+H]+    | 4.671 |
| C41H81O8P   | 3 | 755.55500 | 732.56691 | [M+Na]+   | 1.496 |
| C41H85N2O6P | 1 | 755.60610 | 732.61453 | [M+Na]+   | 3.114 |
| C43H83N2O6P | 1 | 755.60610 | 754.59888 | [M+H]+    | 0.061 |
| C41H68NO8P  | 1 | 756.45830 | 733.46826 | [M+Na]+   | 1.087 |
| C40H70NO10P | 3 | 756.48230 | 755.47374 | [M+H]+    | 1.709 |
| C39H78NO8P  | 1 | 756.49630 | 719.54651 | [M-2H+K]- | 1.576 |
| C39H76NO9P  | 1 | 756.51490 | 733.52577 | [M+Na]+   | 0.124 |

|             |   |           |           |            |       |
|-------------|---|-----------|-----------|------------|-------|
| C41H76NO9P  | 1 | 756.51710 | 757.52577 | [M-H]-     | 1.855 |
| C39H78NO9P  | 1 | 756.51710 | 735.54142 | [M-2H+Na]- | 1.344 |
| C42H78NO8P  | 3 | 756.55340 | 755.54651 | [M+H]+     | 0.500 |
| C42H80NO8P  | 1 | 756.55400 | 757.56216 | [M-H]-     | 1.174 |
| C43H82NO7P  | 1 | 756.59190 | 755.58289 | [M+H]+     | 2.296 |
| C42H71O8P   | 2 | 757.47990 | 734.48866 | [M+Na]+    | 2.667 |
| C39H77O10P  | 1 | 757.49700 | 736.52544 | [M-2H+Na]- | 4.091 |
| C41H72N2O9  | 1 | 757.49700 | 736.52378 | [M-2H+Na]- | 1.906 |
| C41H73O10P  | 6 | 757.49900 | 756.49414 | [M+H]+     | 3.180 |
| C39H75O10P  | 4 | 757.50010 | 734.50979 | [M+Na]+    | 1.439 |
| C47H74O5    | 2 | 757.51490 | 718.55363 | [M+K]+     | 2.477 |
| C40H79O8P   | 2 | 757.51490 | 718.55126 | [M+K]+     | 0.648 |
| C43H75O7P   | 2 | 757.51720 | 734.52504 | [M+Na]+    | 3.875 |
| C47H76O5    | 1 | 757.52000 | 720.56928 | [M-2H+K]-  | 2.804 |
| C43H81O8P   | 2 | 757.57630 | 756.56691 | [M+H]+     | 2.800 |
| C46H86O5    | 1 | 757.61200 | 718.64753 | [M+K]+     | 1.746 |
| C37H70NO10P | 1 | 758.43880 | 719.47374 | [M+K]+     | 2.522 |
| C41H70NO8P  | 3 | 758.47550 | 735.48391 | [M+Na]+    | 3.127 |
| C38H74NO9P  | 4 | 758.47550 | 719.51012 | [M+K]+     | 2.936 |
| C43H68NO8P  | 4 | 758.47550 | 757.46826 | [M+H]+     | 0.036 |
| C38H74NO10P | 2 | 758.49100 | 735.50504 | [M+Na]+    | 4.297 |
| C40H74NO10P | 1 | 758.49800 | 759.50504 | [M-H]-     | 0.306 |
| C39H78NO8P  | 2 | 758.50630 | 719.54651 | [M+K]+     | 4.427 |
| C41H76NO9P  | 1 | 758.53320 | 757.52577 | [M+H]+     | 0.207 |
| C41H78NO9P  | 1 | 758.53480 | 759.54142 | [M-H]-     | 0.853 |
| C45H76NO6P  | 1 | 758.54680 | 757.54103 | [M+H]+     | 1.975 |
| C40H82NO7P  | 1 | 758.54680 | 719.58289 | [M+K]+     | 0.998 |
| C42H80NO8P  | 3 | 758.57040 | 757.56216 | [M+H]+     | 1.281 |
| C44H81NO7   | 1 | 758.59270 | 735.60131 | [M+Na]+    | 2.866 |
| C43H84NO7P  | 2 | 758.60480 | 757.59854 | [M+H]+     | 1.335 |
| C44H88NO6P  | 1 | 758.64580 | 757.63493 | [M+H]+     | 4.748 |
| C42H73O8P   | 1 | 759.49550 | 736.50431 | [M+Na]+    | 2.594 |
| C39H77O8PS  | 2 | 759.49550 | 736.50768 | [M+Na]+    | 1.846 |
| C44H73O8P   | 1 | 759.49870 | 760.50431 | [M-H]-     | 2.187 |
| C41H72N2O9  | 1 | 759.51040 | 736.52378 | [M+Na]+    | 3.430 |
| C41H77O10P  | 1 | 759.51560 | 760.52544 | [M-H]-     | 3.382 |
| C45H77O7P   | 1 | 759.53700 | 760.54069 | [M-H]-     | 4.708 |
| C47H78O5    | 1 | 759.53700 | 722.58493 | [M-2H+K]-  | 4.574 |
| C42H79O9P   | 1 | 759.55020 | 758.54617 | [M+H]+     | 4.271 |
| C43H83O8P   | 1 | 759.58790 | 758.58256 | [M+H]+     | 2.540 |
| C46H88O5    | 1 | 759.62550 | 720.66318 | [M+K]+     | 1.089 |
| C44H87O7P   | 1 | 759.62550 | 758.61894 | [M+H]+     | 0.940 |
| C37H72NO10P | 2 | 760.45080 | 721.48939 | [M+K]+     | 2.285 |
| C41H74NO7P  | 1 | 760.46540 | 723.52029 | [M-2H+K]-  | 4.593 |
| C43H70NO8P  | 4 | 760.48800 | 759.48391 | [M+H]+     | 4.178 |
| C38H76NO9P  | 5 | 760.48800 | 721.52577 | [M+K]+     | 1.214 |
| C40H74NO10P | 1 | 760.50880 | 759.50504 | [M+H]+     | 4.613 |
| C40H76NO10P | 1 | 760.51290 | 761.52069 | [M-H]-     | 0.681 |
| C41H78NO9P  | 1 | 760.54530 | 759.54142 | [M+H]+     | 4.461 |
| C45H78NO6P  | 1 | 760.56190 | 759.55668 | [M+H]+     | 2.693 |
| C42H82NO8P  | 1 | 760.58440 | 759.57781 | [M+H]+     | 0.891 |
| C40H68O7P2  | 2 | 761.40800 | 722.44403 | [M+K]+     | 1.076 |
| C36H67O13P  | 1 | 761.41850 | 738.43193 | [M+Na]+    | 3.487 |

|             |   |           |           |           |       |
|-------------|---|-----------|-----------|-----------|-------|
| C40H66O12   | 1 | 761.44360 | 738.45543 | [M+Na]+   | 1.382 |
| C37H71O12P  | 2 | 761.45710 | 738.46832 | [M+Na]+   | 0.578 |
| C43H68O11   | 1 | 761.48290 | 760.47617 | [M+H]+    | 0.704 |
| C44H73O8P   | 1 | 761.50920 | 760.50431 | [M+H]+    | 3.124 |
| C39H79O9P   | 1 | 761.50920 | 722.54617 | [M+K]+    | 0.163 |
| C42H75O8P   | 1 | 761.50920 | 738.51996 | [M+Na]+   | 0.026 |
| C41H79O10P  | 1 | 761.53380 | 762.54109 | [M-H]-    | 0.025 |
| C41H77O10P  | 2 | 761.53630 | 760.52544 | [M+H]+    | 4.715 |
| C45H77O7P   | 1 | 761.55110 | 760.54069 | [M+H]+    | 4.118 |
| C47H78O5    | 1 | 761.55110 | 722.58493 | [M+K]+    | 3.971 |
| C42H81O9P   | 1 | 761.56810 | 760.56182 | [M+H]+    | 1.305 |
| C45H86O6    | 1 | 761.60470 | 722.64244 | [M+K]+    | 1.171 |
| C43H85O8P   | 1 | 761.60470 | 760.59821 | [M+H]+    | 1.023 |
| C44H89O7P   | 1 | 761.63940 | 760.63459 | [M+H]+    | 3.235 |
| C40H70NO9P  | 1 | 762.46550 | 739.47882 | [M+Na]+   | 3.335 |
| C41H74NO7P  | 1 | 762.48160 | 723.52029 | [M+K]+    | 2.417 |
| C41H73NO9   | 3 | 762.48930 | 723.52854 | [M+K]+    | 3.128 |
| C43H72NO8P  | 6 | 762.50330 | 761.49956 | [M+H]+    | 4.626 |
| C40H76NO10P | 4 | 762.52560 | 761.52069 | [M+H]+    | 3.092 |
| C43H88NO7P  | 1 | 762.63530 | 761.62984 | [M+H]+    | 2.377 |
| C43H65O8P   | 1 | 763.42890 | 740.44171 | [M+Na]+   | 2.659 |
| C36H69O13P  | 2 | 763.43480 | 740.44758 | [M+Na]+   | 2.626 |
| C40H69O10P  | 1 | 763.44970 | 740.46284 | [M+Na]+   | 3.091 |
| C42H67O10P  | 2 | 763.45170 | 762.44719 | [M+H]+    | 3.614 |
| C41H73O8P   | 1 | 763.46870 | 724.50431 | [M+K]+    | 1.625 |
| C41H79N2O6P | 1 | 763.51300 | 726.56758 | [M-2H+K]- | 4.160 |
| C44H75O8P   | 1 | 763.52570 | 762.51996 | [M+H]+    | 2.003 |
| C42H77O8P   | 1 | 763.52570 | 740.53561 | [M+Na]+   | 1.139 |
| C45H79O7P   | 1 | 763.56580 | 762.55634 | [M+H]+    | 2.863 |
| C47H80O5    | 1 | 763.56580 | 724.60058 | [M+K]+    | 2.716 |
| C42H83O9P   | 1 | 763.58140 | 762.57747 | [M+H]+    | 4.379 |
| C39H68NO10P | 1 | 764.44770 | 741.45809 | [M+Na]+   | 0.513 |
| C40H72NO9P  | 1 | 764.48570 | 741.49447 | [M+Na]+   | 2.624 |
| C41H76NO7P  | 1 | 764.49840 | 725.53594 | [M+K]+    | 0.906 |
| C41H75NO9   | 3 | 764.50950 | 725.54419 | [M+K]+    | 2.832 |
| C41H76NO8P  | 2 | 764.52250 | 741.53086 | [M+Na]+   | 3.167 |
| C43H74NO8P  | 3 | 764.52590 | 763.51521 | [M+H]+    | 4.476 |
| C40H78NO10P | 2 | 764.54040 | 763.53634 | [M+H]+    | 4.196 |
| C42H79NO8   | 1 | 764.54610 | 725.58057 | [M+K]+    | 3.113 |
| C42H80NO7P  | 1 | 764.55950 | 741.56724 | [M+Na]+   | 3.971 |
| C44H78NO7P  | 1 | 764.55950 | 763.55159 | [M+H]+    | 0.833 |
| C41H82NO9P  | 1 | 764.57720 | 763.57272 | [M+H]+    | 3.653 |
| C40H71O9P   | 1 | 765.44600 | 726.48357 | [M+K]+    | 0.946 |
| C38H69O13P  | 1 | 765.45250 | 764.44758 | [M+H]+    | 3.075 |
| C38H68O15   | 3 | 765.46600 | 764.45583 | [M+H]+    | 3.794 |
| C42H69O10P  | 4 | 765.46680 | 764.46284 | [M+H]+    | 4.323 |
| C39H73O12P  | 2 | 765.49450 | 764.48397 | [M+H]+    | 4.260 |
| C42H79O8P   | 1 | 765.53790 | 742.55126 | [M+Na]+   | 3.370 |
| C52H76O4    | 1 | 765.58020 | 764.57436 | [M+H]+    | 1.869 |
| C45H81O7P   | 1 | 765.58020 | 764.57199 | [M+H]+    | 1.223 |
| C42H85O9P   | 2 | 765.60320 | 764.59312 | [M+H]+    | 3.665 |
| C39H70NO10P | 1 | 766.46090 | 743.47374 | [M+Na]+   | 2.685 |
| C43H70NO7P  | 1 | 766.48050 | 743.48899 | [M+Na]+   | 2.984 |

|             |   |           |           |                        |       |
|-------------|---|-----------|-----------|------------------------|-------|
| C42H72NO9P  | 2 | 766.49870 | 765.49447 | [M+H] <sup>+</sup>     | 3.970 |
| C40H74NO9P  | 2 | 766.49870 | 743.51012 | [M+Na] <sup>+</sup>    | 0.840 |
| C41H78NO7P  | 2 | 766.51390 | 727.55159 | [M+K] <sup>+</sup>     | 1.100 |
| C41H78NO8P  | 1 | 766.53700 | 743.54651 | [M+Na] <sup>+</sup>    | 1.658 |
| C43H76NO8P  | 6 | 766.53700 | 765.53086 | [M+H] <sup>+</sup>     | 1.472 |
| C42H81NO8   | 2 | 766.55560 | 727.59622 | [M+K] <sup>+</sup>     | 4.918 |
| C40H73O9P   | 1 | 767.46380 | 728.49922 | [M+K] <sup>+</sup>     | 1.858 |
| C45H67O8P   | 3 | 767.46690 | 766.45736 | [M+H] <sup>+</sup>     | 2.959 |
| C38H71O13P  | 5 | 767.47210 | 766.46323 | [M+H] <sup>+</sup>     | 2.080 |
| C45H66O10   | 4 | 767.47210 | 766.46560 | [M+H] <sup>+</sup>     | 1.005 |
| C42H71O10P  | 5 | 767.48570 | 766.47849 | [M+H] <sup>+</sup>     | 0.077 |
| C41H79O8P   | 1 | 767.50080 | 730.55126 | [M-2H+K] <sup>-</sup>  | 1.226 |
| C41H77O8P   | 1 | 767.50150 | 728.53561 | [M+K] <sup>+</sup>     | 3.571 |
| C39H75O12P  | 1 | 767.51010 | 766.49962 | [M+H] <sup>+</sup>     | 4.184 |
| C41H77O9P   | 1 | 767.51700 | 744.53052 | [M+Na] <sup>+</sup>    | 3.576 |
| C41H81N2O6P | 1 | 767.54950 | 728.58323 | [M+K] <sup>+</sup>     | 4.070 |
| C44H79O8P   | 1 | 767.55660 | 766.55126 | [M+H] <sup>+</sup>     | 2.513 |
| C42H81O8P   | 1 | 767.55660 | 744.56691 | [M+Na] <sup>+</sup>    | 0.612 |
| C43H85O7P   | 1 | 767.59510 | 744.60329 | [M+Na] <sup>+</sup>    | 3.368 |
| C45H83O7P   | 3 | 767.59770 | 766.58764 | [M+H] <sup>+</sup>     | 3.630 |
| C47H84O5    | 2 | 767.59770 | 728.63188 | [M+K] <sup>+</sup>     | 3.484 |
| C38H68NO10P | 1 | 768.41880 | 729.45809 | [M+K] <sup>+</sup>     | 3.171 |
| C39H72NO9P  | 1 | 768.45380 | 729.49447 | [M+K] <sup>+</sup>     | 4.975 |
| C43H72NO6P  | 1 | 768.47200 | 729.50973 | [M+K] <sup>+</sup>     | 1.141 |
| C43H74NO7P  | 1 | 768.49550 | 747.52029 | [M-2H+Na] <sup>-</sup> | 0.712 |
| C40H78NO8P  | 1 | 768.49550 | 731.54651 | [M-2H+K] <sup>-</sup>  | 0.510 |
| C43H72NO7P  | 3 | 768.49560 | 745.50464 | [M+Na] <sup>+</sup>    | 2.260 |
| C40H78NO9P  | 1 | 768.51380 | 747.54142 | [M-2H+Na] <sup>-</sup> | 2.971 |
| C40H76NO9P  | 3 | 768.51750 | 745.52577 | [M+Na] <sup>+</sup>    | 3.261 |
| C42H74NO9P  | 4 | 768.51750 | 767.51012 | [M+H] <sup>+</sup>     | 0.139 |
| C41H80NO8P  | 2 | 768.55410 | 745.56216 | [M+Na] <sup>+</sup>    | 3.540 |
| C43H78NO8P  | 4 | 768.55590 | 767.54651 | [M+H] <sup>+</sup>     | 2.761 |
| C42H84NO6P  | 1 | 768.56720 | 729.60363 | [M+K] <sup>+</sup>     | 0.549 |
| C44H82NO7P  | 2 | 768.58880 | 767.58289 | [M+H] <sup>+</sup>     | 1.773 |
| C42H84NO7P  | 1 | 768.59140 | 745.59854 | [M+Na] <sup>+</sup>    | 4.731 |
| C45H86NO6P  | 4 | 768.62370 | 767.61928 | [M+H] <sup>+</sup>     | 3.705 |
| C42H67O8P   | 1 | 769.41750 | 730.45736 | [M+K] <sup>+</sup>     | 3.911 |
| C45H69O8P   | 2 | 769.47810 | 768.47301 | [M+H] <sup>+</sup>     | 2.832 |
| C43H71O8P   | 2 | 769.47810 | 746.48866 | [M+Na] <sup>+</sup>    | 0.286 |
| C40H75O9P   | 1 | 769.47810 | 730.51487 | [M+K] <sup>+</sup>     | 0.099 |
| C38H73O13P  | 3 | 769.48370 | 768.47888 | [M+H] <sup>+</sup>     | 3.189 |
| C43H70O10   | 2 | 769.48370 | 746.49690 | [M+Na] <sup>+</sup>    | 3.148 |
| C45H68O10   | 3 | 769.48870 | 768.48125 | [M+H] <sup>+</sup>     | 0.233 |
| C42H75O10P  | 1 | 769.49940 | 770.50979 | [M-H] <sup>-</sup>     | 4.053 |
| C40H77O10P  | 1 | 769.49940 | 748.52544 | [M-2H+Na] <sup>-</sup> | 0.908 |
| C47H70O7    | 6 | 769.49960 | 746.51220 | [M+Na] <sup>+</sup>    | 2.366 |
| C42H73O10P  | 6 | 769.49960 | 768.49414 | [M+H] <sup>+</sup>     | 2.351 |
| C40H75O10P  | 6 | 769.49960 | 746.50979 | [M+Na] <sup>+</sup>    | 0.767 |
| C41H79O8P   | 1 | 769.51490 | 730.55126 | [M+K] <sup>+</sup>     | 0.638 |
| C39H77O12P  | 1 | 769.52440 | 768.51527 | [M+H] <sup>+</sup>     | 2.418 |
| C42H83O7P   | 2 | 769.54890 | 730.58764 | [M+K] <sup>+</sup>     | 2.461 |
| C41H83N2O6P | 1 | 769.56080 | 730.59888 | [M+K] <sup>+</sup>     | 1.593 |
| C43H87O7P   | 1 | 769.61160 | 746.61894 | [M+Na] <sup>+</sup>    | 4.463 |

|             |   |           |           |                        |       |
|-------------|---|-----------|-----------|------------------------|-------|
| C45H85O7P   | 1 | 769.61160 | 768.60329 | [M+H] <sup>+</sup>     | 1.346 |
| C47H86O5    | 1 | 769.61160 | 730.64753 | [M+K] <sup>+</sup>     | 1.199 |
| C39H74NO9P  | 1 | 770.47280 | 731.51012 | [M+K] <sup>+</sup>     | 0.614 |
| C39H74NO10P | 2 | 770.49100 | 747.50504 | [M+Na] <sup>+</sup>    | 4.230 |
| C43H74NO6P  | 1 | 770.49230 | 731.52538 | [M+K] <sup>+</sup>     | 4.896 |
| C41H72NO10P | 1 | 770.49430 | 769.48939 | [M+H] <sup>+</sup>     | 3.060 |
| C43H74NO7P  | 2 | 770.51320 | 747.52029 | [M+Na] <sup>+</sup>    | 4.784 |
| C46H73N3O4  | 1 | 770.52460 | 731.56011 | [M+K] <sup>+</sup>     | 1.743 |
| C42H76NO9P  | 1 | 770.53170 | 769.52577 | [M+H] <sup>+</sup>     | 1.743 |
| C40H80NO9P  | 1 | 770.53440 | 749.55707 | [M-2H+Na] <sup>-</sup> | 3.461 |
| C42H78NO9P  | 1 | 770.53440 | 771.54142 | [M-H] <sup>-</sup>     | 0.321 |
| C43H80NO8P  | 1 | 770.56720 | 769.56216 | [M+H] <sup>+</sup>     | 2.891 |
| C41H82NO8P  | 1 | 770.56720 | 747.57781 | [M+Na] <sup>+</sup>    | 0.222 |
| C43H82NO8P  | 1 | 770.57130 | 771.57781 | [M-H] <sup>-</sup>     | 0.989 |
| C42H86NO7P  | 3 | 770.60130 | 747.61419 | [M+Na] <sup>+</sup>    | 2.743 |
| C44H84NO7P  | 1 | 770.60290 | 769.59854 | [M+H] <sup>+</sup>     | 3.780 |
| C40H66O14   | 2 | 771.45480 | 770.44526 | [M+H] <sup>+</sup>     | 2.941 |
| C43H73O7P   | 1 | 771.47570 | 732.50939 | [M+K] <sup>+</sup>     | 4.091 |
| C43H73O8P   | 1 | 771.49490 | 748.50431 | [M+Na] <sup>+</sup>    | 1.776 |
| C40H77O9P   | 1 | 771.49490 | 732.53052 | [M+K] <sup>+</sup>     | 1.589 |
| C45H71O8P   | 2 | 771.49820 | 770.48866 | [M+H] <sup>+</sup>     | 2.944 |
| C45H70O10   | 3 | 771.50210 | 770.49690 | [M+H] <sup>+</sup>     | 2.684 |
| C40H77O10P  | 5 | 771.51600 | 748.52544 | [M+Na] <sup>+</sup>    | 1.737 |
| C42H75O10P  | 6 | 771.51600 | 770.50979 | [M+H] <sup>+</sup>     | 1.373 |
| C41H81O8P   | 1 | 771.53210 | 732.56691 | [M+K] <sup>+</sup>     | 2.645 |
| C41H81O9P   | 2 | 771.54740 | 748.56182 | [M+Na] <sup>+</sup>    | 4.724 |
| C44H83O8P   | 2 | 771.58980 | 770.58256 | [M+H] <sup>+</sup>     | 0.038 |
| C42H72NO8P  | 2 | 772.49030 | 749.49956 | [M+Na] <sup>+</sup>    | 1.970 |
| C39H76NO9P  | 2 | 772.49030 | 733.52577 | [M+K] <sup>+</sup>     | 1.783 |
| C39H76NO10P | 2 | 772.50640 | 749.52069 | [M+Na] <sup>+</sup>    | 4.542 |
| C41H74NO10P | 2 | 772.50890 | 771.50504 | [M+H] <sup>+</sup>     | 4.412 |
| C41H76NO10P | 1 | 772.51190 | 773.52069 | [M-H] <sup>-</sup>     | 1.965 |
| C40H80NO9P  | 2 | 772.54290 | 749.55707 | [M+Na] <sup>+</sup>    | 4.393 |
| C42H75N3O8  | 1 | 772.54740 | 749.55542 | [M+Na] <sup>+</sup>    | 3.575 |
| C42H78NO9P  | 1 | 772.54740 | 771.54142 | [M+H] <sup>+</sup>     | 1.674 |
| C44H81NO7   | 1 | 772.54880 | 735.60131 | [M-2H+K] <sup>-</sup>  | 1.430 |
| C42H80NO9P  | 1 | 772.54880 | 773.55707 | [M-H] <sup>-</sup>     | 1.298 |
| C41H84NO7P  | 1 | 772.56020 | 733.59854 | [M+K] <sup>+</sup>     | 1.933 |
| C46H78NO6P  | 2 | 772.56570 | 771.55668 | [M+H] <sup>+</sup>     | 2.268 |
| C43H82NO8P  | 1 | 772.58260 | 771.57781 | [M+H] <sup>+</sup>     | 3.207 |
| C42H88NO6P  | 2 | 772.60120 | 733.63493 | [M+K] <sup>+</sup>     | 4.041 |
| C42H71O8P   | 1 | 773.45430 | 734.48866 | [M+K] <sup>+</sup>     | 3.221 |
| C36H68O17   | 1 | 773.45430 | 772.44566 | [M+H] <sup>+</sup>     | 1.776 |
| C48H68O8    | 1 | 773.49820 | 772.49142 | [M+H] <sup>+</sup>     | 0.635 |
| C45H73O8P   | 2 | 773.51030 | 772.50431 | [M+H] <sup>+</sup>     | 1.653 |
| C43H75O8P   | 2 | 773.51030 | 750.51996 | [M+Na] <sup>+</sup>    | 1.448 |
| C40H79O9P   | 2 | 773.51030 | 734.54617 | [M+K] <sup>+</sup>     | 1.262 |
| C45H74O10   | 1 | 773.51730 | 774.52820 | [M-H] <sup>-</sup>     | 4.694 |
| C45H72O10   | 1 | 773.52210 | 772.51255 | [M+H] <sup>+</sup>     | 2.946 |
| C40H79O10P  | 1 | 773.53290 | 750.54109 | [M+Na] <sup>+</sup>    | 3.348 |
| C42H77O10P  | 3 | 773.53480 | 772.52544 | [M+H] <sup>+</sup>     | 2.703 |
| C42H79O10P  | 1 | 773.53700 | 774.54109 | [M-H] <sup>-</sup>     | 4.112 |
| C45H89O7P   | 1 | 773.64430 | 772.63459 | [M+H] <sup>+</sup>     | 3.149 |

|             |   |           |           |            |       |
|-------------|---|-----------|-----------|------------|-------|
| C47H90O5    | 1 | 773.64430 | 734.67883 | [M+K]+     | 3.003 |
| C38H74NO10P | 1 | 774.46770 | 735.50504 | [M+K]+     | 0.630 |
| C44H72NO8P  | 4 | 774.50330 | 773.49956 | [M+H]+     | 4.554 |
| C39H78NO9P  | 5 | 774.50330 | 735.54142 | [M+K]+     | 1.644 |
| C41H76NO10P | 3 | 774.52520 | 773.52069 | [M+H]+     | 3.561 |
| C45H76NO7P  | 2 | 774.53940 | 773.53594 | [M+H]+     | 4.923 |
| C43H78NO7P  | 2 | 774.53940 | 751.55159 | [M+Na]+    | 1.826 |
| C42H80NO9P  | 2 | 774.56510 | 773.55707 | [M+H]+     | 0.977 |
| C44H81NO7   | 2 | 774.56510 | 735.60131 | [M+K]+     | 0.833 |
| C46H80NO6P  | 2 | 774.57660 | 773.57233 | [M+H]+     | 3.870 |
| C44H81NO8   | 1 | 774.58310 | 751.59622 | [M+Na]+    | 3.022 |
| C39H67O13P  | 2 | 775.43780 | 774.43193 | [M+H]+     | 1.811 |
| C37H69O13P  | 1 | 775.43960 | 752.44758 | [M+Na]+    | 3.604 |
| C42H73O8P   | 3 | 775.47120 | 736.50431 | [M+K]+     | 4.824 |
| C39H77O8PS  | 2 | 775.47120 | 736.50768 | [M+K]+     | 0.476 |
| C38H73O12P  | 3 | 775.47410 | 752.48397 | [M+Na]+    | 1.173 |
| C47H66O9    | 1 | 775.48090 | 774.47070 | [M+H]+     | 3.778 |
| C39H77O10P  | 1 | 775.48730 | 736.52544 | [M+K]+     | 1.662 |
| C44H71O9P   | 3 | 775.49430 | 774.48357 | [M+H]+     | 4.457 |
| C43H77O7P   | 3 | 775.50750 | 736.54069 | [M+K]+     | 4.714 |
| C45H75O8P   | 1 | 775.52550 | 774.51996 | [M+H]+     | 2.229 |
| C40H81O9P   | 1 | 775.52550 | 736.56182 | [M+K]+     | 0.678 |
| C45H74O10   | 1 | 775.53420 | 774.52820 | [M+H]+     | 1.639 |
| C42H66NO10P | 2 | 776.44800 | 775.44244 | [M+H]+     | 2.198 |
| C40H68NO10P | 2 | 776.44800 | 753.45809 | [M+Na]+    | 0.891 |
| C44H74NO8P  | 5 | 776.52020 | 775.51521 | [M+H]+     | 2.934 |
| C42H76NO8P  | 1 | 776.52020 | 753.53086 | [M+Na]+    | 0.156 |
| C41H78NO10P | 2 | 776.54500 | 775.53634 | [M+H]+     | 1.793 |
| C43H80NO7P  | 1 | 776.55340 | 753.56724 | [M+Na]+    | 3.946 |
| C45H78NO7P  | 1 | 776.56070 | 775.55159 | [M+H]+     | 2.366 |
| C42H82NO9P  | 2 | 776.57860 | 775.57272 | [M+H]+     | 1.794 |
| C44H90NO7P  | 1 | 776.65600 | 775.64549 | [M+H]+     | 4.168 |
| C40H66O12   | 1 | 777.41950 | 738.45543 | [M+K]+     | 1.182 |
| C42H75O8P   | 1 | 777.48530 | 738.51996 | [M+K]+     | 2.818 |
| C43H79O7P   | 2 | 777.52000 | 738.55634 | [M+K]+     | 0.651 |
| C45H76O10   | 1 | 777.54980 | 776.54385 | [M+H]+     | 1.699 |
| C43H78O10   | 1 | 777.54980 | 754.55950 | [M+Na]+    | 1.386 |
| C43H83N2O6P | 1 | 777.58970 | 754.59888 | [M+Na]+    | 2.062 |
| C39H66NO10P | 1 | 778.40700 | 739.44244 | [M+K]+     | 1.815 |
| C40H70NO10P | 1 | 778.46180 | 755.47374 | [M+Na]+    | 1.488 |
| C42H68NO10P | 3 | 778.46490 | 777.45809 | [M+H]+     | 0.587 |
| C42H78NO7P  | 1 | 778.51760 | 739.55159 | [M+K]+     | 3.670 |
| C42H78NO8P  | 2 | 778.53730 | 755.54651 | [M+Na]+    | 2.018 |
| C44H76NO8P  | 2 | 778.53730 | 777.53086 | [M+H]+     | 1.064 |
| C41H80NO10P | 2 | 778.55930 | 777.55199 | [M+H]+     | 0.054 |
| C45H80NO7P  | 2 | 778.57600 | 777.56724 | [M+H]+     | 1.910 |
| C42H84NO9P  | 1 | 778.59540 | 777.58837 | [M+H]+     | 0.312 |
| C39H64O13   | 1 | 779.39600 | 740.43470 | [M+K]+     | 2.368 |
| C37H73O12P  | 2 | 779.44340 | 740.48397 | [M+K]+     | 4.771 |
| C43H71O10P  | 4 | 779.48230 | 778.47849 | [M+H]+     | 4.438 |
| C41H75O10P  | 1 | 779.48830 | 758.50979 | [M-2H+Na]- | 4.940 |
| C43H73O10P  | 1 | 779.48830 | 780.49414 | [M-H]-     | 1.836 |
| C42H77O8P   | 1 | 779.49910 | 740.53561 | [M+K]+     | 0.437 |

|             |   |           |           |                        |       |
|-------------|---|-----------|-----------|------------------------|-------|
| C40H75O12P  | 2 | 779.50630 | 778.49962 | [M+H] <sup>+</sup>     | 0.756 |
| C45H79O8P   | 1 | 779.55720 | 778.55126 | [M+H] <sup>+</sup>     | 1.705 |
| C43H81O8P   | 1 | 779.55720 | 756.56691 | [M+Na] <sup>+</sup>    | 1.373 |
| C43H80O10   | 1 | 779.56730 | 756.57515 | [M+Na] <sup>+</sup>    | 3.756 |
| C45H78O10   | 1 | 779.56730 | 778.55950 | [M+H] <sup>+</sup>     | 0.679 |
| C42H83O10P  | 1 | 779.58090 | 778.57239 | [M+H] <sup>+</sup>     | 1.592 |
| C49H94O6    | 1 | 779.71290 | 778.70504 | [M+H] <sup>+</sup>     | 0.754 |
| C43H68NO8P  | 1 | 780.46010 | 757.46826 | [M+Na] <sup>+</sup>    | 3.360 |
| C42H70NO10P | 1 | 780.48430 | 779.47374 | [M+H] <sup>+</sup>     | 4.219 |
| C41H78NO8P  | 1 | 780.49520 | 743.54651 | [M-2H+K] <sup>-</sup>  | 0.118 |
| C41H76NO8P  | 1 | 780.49620 | 741.53086 | [M+K] <sup>+</sup>     | 2.808 |
| C41H76NO9P  | 1 | 780.51690 | 757.52577 | [M+Na] <sup>+</sup>    | 2.442 |
| C43H74NO9P  | 2 | 780.51990 | 779.51012 | [M+H] <sup>+</sup>     | 3.212 |
| C42H80NO8P  | 1 | 780.55290 | 757.56216 | [M+Na] <sup>+</sup>    | 1.949 |
| C44H78NO8P  | 4 | 780.55290 | 779.54651 | [M+H] <sup>+</sup>     | 1.125 |
| C45H82NO7P  | 2 | 780.59350 | 779.58289 | [M+H] <sup>+</sup>     | 4.275 |
| C44H87NO8   | 1 | 780.63600 | 757.64317 | [M+Na] <sup>+</sup>    | 4.623 |
| C49H91NO4   | 1 | 780.68270 | 757.69481 | [M+Na] <sup>+</sup>    | 1.705 |
| C41H64O14   | 3 | 781.44000 | 780.42961 | [M+H] <sup>+</sup>     | 3.991 |
| C39H73O13P  | 1 | 781.48760 | 780.47888 | [M+H] <sup>+</sup>     | 1.850 |
| C43H73O10P  | 2 | 781.50000 | 780.49414 | [M+H] <sup>+</sup>     | 1.803 |
| C41H75O10P  | 1 | 781.50000 | 758.50979 | [M+Na] <sup>+</sup>    | 1.267 |
| C40H77O12P  | 1 | 781.52210 | 780.51527 | [M+H] <sup>+</sup>     | 0.562 |
| C42H79O9P   | 1 | 781.53160 | 758.54617 | [M+Na] <sup>+</sup>    | 4.856 |
| C44H77O9P   | 1 | 781.53910 | 780.53052 | [M+H] <sup>+</sup>     | 1.671 |
| C52H76O5    | 2 | 781.57290 | 780.56928 | [M+H] <sup>+</sup>     | 4.665 |
| C45H81O8P   | 2 | 781.57290 | 780.56691 | [M+H] <sup>+</sup>     | 1.636 |
| C43H83O8P   | 1 | 781.57290 | 758.58256 | [M+Na] <sup>+</sup>    | 1.433 |
| C43H70NO7P  | 1 | 782.45310 | 743.48899 | [M+K] <sup>+</sup>     | 1.224 |
| C45H70NO8P  | 1 | 782.47510 | 783.48391 | [M-H] <sup>-</sup>     | 1.964 |
| C43H72NO8P  | 1 | 782.47510 | 761.49956 | [M-2H+Na] <sup>-</sup> | 1.128 |
| C40H76NO9P  | 1 | 782.47510 | 745.52577 | [M-2H+K] <sup>-</sup>  | 0.929 |
| C40H74NO10P | 1 | 782.49570 | 759.50504 | [M+Na] <sup>+</sup>    | 1.842 |
| C42H72NO10P | 2 | 782.49640 | 781.48939 | [M+H] <sup>+</sup>     | 0.330 |
| C41H77NO10  | 1 | 782.51810 | 743.55475 | [M+K] <sup>+</sup>     | 0.256 |
| C41H78NO9P  | 1 | 782.52750 | 759.54142 | [M+Na] <sup>+</sup>    | 4.018 |
| C43H78NO9P  | 1 | 782.53580 | 783.54142 | [M-H] <sup>-</sup>     | 2.105 |
| C42H82NO8P  | 2 | 782.56480 | 759.57781 | [M+Na] <sup>+</sup>    | 2.848 |
| C44H80NO8P  | 3 | 782.57170 | 781.56216 | [M+H] <sup>+</sup>     | 2.903 |
| C43H86NO7P  | 2 | 782.60490 | 759.61419 | [M+Na] <sup>+</sup>    | 1.899 |
| C45H84NO7P  | 3 | 782.60490 | 781.59854 | [M+H] <sup>+</sup>     | 1.167 |
| C43H75O10P  | 5 | 783.51420 | 782.50979 | [M+H] <sup>+</sup>     | 3.649 |
| C41H77O10P  | 3 | 783.51420 | 760.52544 | [M+Na] <sup>+</sup>    | 0.587 |
| C40H79O12P  | 2 | 783.53630 | 782.53092 | [M+H] <sup>+</sup>     | 2.411 |
| C42H81O9P   | 1 | 783.54890 | 760.56182 | [M+Na] <sup>+</sup>    | 2.738 |
| C43H85O7P   | 1 | 783.56470 | 744.60329 | [M+K] <sup>+</sup>     | 2.226 |
| C43H85O8P   | 2 | 783.58570 | 760.59821 | [M+Na] <sup>+</sup>    | 2.208 |
| C45H83O8P   | 1 | 783.58660 | 782.58256 | [M+H] <sup>+</sup>     | 4.121 |
| C45H82O10   | 1 | 783.59690 | 782.59080 | [M+H] <sup>+</sup>     | 1.494 |
| C45H87N2O6P | 1 | 783.64050 | 782.63018 | [M+H] <sup>+</sup>     | 3.897 |
| C42H74NO10P | 4 | 784.51200 | 783.50504 | [M+H] <sup>+</sup>     | 0.393 |
| C40H78NO10P | 1 | 784.51330 | 763.53634 | [M-2H+Na] <sup>-</sup> | 2.934 |
| C42H76NO10P | 1 | 784.51330 | 785.52069 | [M-H] <sup>-</sup>     | 0.150 |

|             |   |           |           |           |       |
|-------------|---|-----------|-----------|-----------|-------|
| C41H80NO9P  | 1 | 784.54850 | 761.55707 | [M+Na]+   | 2.812 |
| C43H78NO9P  | 1 | 784.54850 | 783.54142 | [M+H]+    | 0.246 |
| C42H84NO7P  | 1 | 784.55990 | 745.59854 | [M+K]+    | 2.285 |
| C42H84NO8P  | 2 | 784.57940 | 761.59346 | [M+Na]+   | 4.179 |
| C44H82NO8P  | 1 | 784.58630 | 783.57781 | [M+H]+    | 1.558 |
| C45H86NO7P  | 3 | 784.62080 | 783.61419 | [M+H]+    | 0.845 |
| C46H89NO8   | 2 | 784.66920 | 783.65882 | [M+H]+    | 3.963 |
| C46H66O8    | 1 | 785.43750 | 746.47577 | [M+K]+    | 1.809 |
| C44H75O8P   | 1 | 785.50960 | 762.51996 | [M+Na]+   | 0.535 |
| C41H79O9P   | 2 | 785.50960 | 746.54617 | [M+K]+    | 0.351 |
| C41H79O10P  | 5 | 785.53310 | 762.54109 | [M+Na]+   | 3.552 |
| C43H77O10P  | 5 | 785.53310 | 784.52544 | [M+H]+    | 0.498 |
| C42H83O8P   | 1 | 785.54540 | 746.58256 | [M+K]+    | 0.393 |
| C44H81O9P   | 3 | 785.56680 | 784.56182 | [M+H]+    | 2.920 |
| C42H83O9P   | 3 | 785.56680 | 762.57747 | [M+Na]+   | 0.134 |
| C56H80O2    | 2 | 785.62520 | 784.61583 | [M+H]+    | 2.672 |
| C39H74NO10P | 1 | 786.47150 | 747.50504 | [M+K]+    | 4.211 |
| C43H74NO7P  | 1 | 786.48310 | 747.52029 | [M+K]+    | 0.436 |
| C40H78NO9P  | 1 | 786.50280 | 747.54142 | [M+K]+    | 2.254 |
| C45H72NO8P  | 3 | 786.50300 | 785.49956 | [M+H]+    | 4.866 |
| C43H74NO8P  | 1 | 786.50300 | 763.51521 | [M+Na]+   | 1.817 |
| C40H78NO10P | 1 | 786.52890 | 763.53634 | [M+Na]+   | 4.248 |
| C42H76NO10P | 1 | 786.52890 | 785.52069 | [M+H]+    | 1.198 |
| C42H78NO10P | 1 | 786.52980 | 787.53634 | [M-H]-    | 0.931 |
| C41H82NO8P  | 2 | 786.53870 | 747.57781 | [M+K]+    | 2.871 |
| C44H78NO7P  | 3 | 786.53870 | 763.55159 | [M+Na]+   | 2.688 |
| C44H84NO8P  | 1 | 786.59760 | 785.59346 | [M+H]+    | 3.977 |
| C48H83NO7   | 1 | 786.62370 | 785.61696 | [M+H]+    | 0.667 |
| C45H88NO7P  | 3 | 786.63740 | 785.62984 | [M+H]+    | 0.365 |
| C45H87NO9   | 2 | 786.64700 | 785.63809 | [M+H]+    | 2.091 |
| C41H64O13   | 1 | 787.42010 | 764.43470 | [M+Na]+   | 4.847 |
| C38H69O13P  | 1 | 787.43460 | 764.44758 | [M+Na]+   | 2.800 |
| C40H66O15   | 1 | 787.44500 | 786.44018 | [M+H]+    | 3.106 |
| C38H68O15   | 1 | 787.44500 | 764.45583 | [M+Na]+   | 0.060 |
| C43H73O8P   | 1 | 787.46410 | 748.50431 | [M+K]+    | 4.266 |
| C39H73O12P  | 2 | 787.47630 | 764.48397 | [M+Na]+   | 3.949 |
| C40H79O10P  | 1 | 787.48630 | 750.54109 | [M-2H+K]- | 4.304 |
| C52H76O4    | 2 | 787.56050 | 764.57436 | [M+Na]+   | 3.913 |
| C45H81O7P   | 2 | 787.56050 | 764.57199 | [M+Na]+   | 0.908 |
| C42H85O9P   | 1 | 787.58370 | 764.59312 | [M+Na]+   | 1.720 |
| C44H83O9P   | 1 | 787.58370 | 786.57747 | [M+H]+    | 1.326 |
| C56H82O2    | 1 | 787.63870 | 786.63148 | [M+H]+    | 0.065 |
| C45H91N2O6P | 1 | 787.67210 | 786.66148 | [M+H]+    | 4.258 |
| C41H68NO10P | 3 | 788.44780 | 765.45809 | [M+Na]+   | 0.624 |
| C42H74NO8P  | 1 | 788.46040 | 751.51521 | [M-2H+K]- | 4.322 |
| C39H76NO10P | 2 | 788.48170 | 749.52069 | [M+K]+    | 2.712 |
| C42H72NO9P  | 3 | 788.48170 | 765.49447 | [M+Na]+   | 2.529 |
| C43H76NO7P  | 1 | 788.49730 | 749.53594 | [M+K]+    | 2.274 |
| C45H74NO8P  | 5 | 788.51910 | 787.51521 | [M+H]+    | 4.284 |
| C40H80NO9P  | 3 | 788.51910 | 749.55707 | [M+K]+    | 1.424 |
| C42H75N3O8  | 3 | 788.51910 | 749.55542 | [M+K]+    | 0.676 |
| C42H78NO10P | 2 | 788.54430 | 787.53634 | [M+H]+    | 0.878 |
| C46H78NO7P  | 1 | 788.55580 | 787.55159 | [M+H]+    | 3.884 |



|             |   |           |           |         |       |
|-------------|---|-----------|-----------|---------|-------|
| C44H80NO7P  | 1 | 788.55580 | 765.56724 | [M+Na]+ | 0.842 |
| C43H82NO9P  | 1 | 788.58190 | 787.57272 | [M+H]+  | 2.418 |
| C45H90NO7P  | 1 | 788.64980 | 787.64549 | [M+H]+  | 3.757 |
| C45H66O10   | 1 | 789.45820 | 766.46560 | [M+Na]+ | 4.279 |
| C40H69O13P  | 1 | 789.45820 | 788.44758 | [M+H]+  | 4.238 |
| C40H68O15   | 1 | 789.46360 | 788.45583 | [M+H]+  | 0.638 |
| C44H69O10P  | 1 | 789.46920 | 788.46284 | [M+H]+  | 1.151 |
| C43H75O8P   | 1 | 789.48430 | 750.51996 | [M+K]+  | 1.509 |
| C39H75O12P  | 2 | 789.49010 | 766.49962 | [M+Na]+ | 1.596 |
| C44H79O8P   | 1 | 789.53740 | 766.55126 | [M+Na]+ | 3.901 |
| C46H77O8P   | 1 | 789.54590 | 788.53561 | [M+H]+  | 3.826 |
| C45H89O8P   | 1 | 789.63620 | 788.62951 | [M+H]+  | 0.733 |
| C41H75O12S  | 1 | 790.49390 | 791.49790 | [M-H]-  | 4.137 |
| C42H74NO9P  | 1 | 790.49850 | 767.51012 | [M+Na]+ | 1.068 |
| C45H76NO8P  | 4 | 790.53620 | 789.53086 | [M+H]+  | 2.439 |
| C43H78NO8P  | 1 | 790.53860 | 767.54651 | [M+Na]+ | 3.632 |
| C42H80NO10P | 1 | 790.55600 | 789.55199 | [M+H]+  | 4.121 |
| C46H80NO7P  | 1 | 790.57660 | 789.56724 | [M+H]+  | 2.640 |
| C44H88NO8P  | 1 | 790.63280 | 789.62476 | [M+H]+  | 0.976 |
| C37H69O13P  | 1 | 791.40750 | 752.44758 | [M+K]+  | 4.086 |
| C38H73O12P  | 1 | 791.44350 | 752.48397 | [M+K]+  | 4.573 |
| C40H71O13P  | 2 | 791.47180 | 790.46323 | [M+H]+  | 1.637 |
| C44H71O10P  | 4 | 791.48200 | 790.47849 | [M+H]+  | 4.749 |
| C43H77O8P   | 2 | 791.49690 | 752.53561 | [M+K]+  | 2.349 |
| C44H81O8P   | 1 | 791.55960 | 768.56691 | [M+Na]+ | 4.384 |
| C46H79O8P   | 1 | 791.55960 | 790.55126 | [M+H]+  | 1.353 |
| C40H68NO10P | 1 | 792.42350 | 753.45809 | [M+K]+  | 2.856 |
| C41H72NO10P | 1 | 792.47820 | 769.48939 | [M+Na]+ | 0.516 |
| C43H70NO10P | 2 | 792.48440 | 791.47374 | [M+H]+  | 4.281 |
| C41H75O12S  | 1 | 792.50660 | 791.49790 | [M+H]+  | 1.804 |
| C42H76NO9P  | 1 | 792.51560 | 769.52577 | [M+Na]+ | 0.765 |
| C44H74NO9P  | 3 | 792.51580 | 791.51012 | [M+H]+  | 2.010 |
| C43H80NO8P  | 1 | 792.55280 | 769.56216 | [M+Na]+ | 1.793 |
| C45H78NO8P  | 1 | 792.55280 | 791.54651 | [M+H]+  | 1.234 |
| C44H84NO6P  | 1 | 792.56490 | 753.60363 | [M+K]+  | 2.370 |
| C45H87NO8   | 1 | 792.62880 | 769.64317 | [M+Na]+ | 4.530 |
| C37H71O13P  | 1 | 793.42910 | 754.46323 | [M+K]+  | 3.423 |
| C42H75O9P   | 3 | 793.47600 | 754.51487 | [M+K]+  | 2.551 |
| C45H71O8P   | 2 | 793.47600 | 770.48866 | [M+Na]+ | 2.369 |
| C47H69O8P   | 2 | 793.47710 | 792.47301 | [M+H]+  | 4.006 |
| C44H73O10P  | 5 | 793.49860 | 792.49414 | [M+H]+  | 3.540 |
| C43H79O8P   | 1 | 793.51580 | 754.55126 | [M+K]+  | 1.753 |
| C41H77O12P  | 2 | 793.52490 | 792.51527 | [M+H]+  | 2.975 |
| C43H78O10   | 1 | 793.52490 | 754.55950 | [M+K]+  | 2.834 |
| C43H83N2O6P | 2 | 793.56470 | 754.59888 | [M+K]+  | 3.370 |
| C43H85O10P  | 2 | 793.59710 | 792.58804 | [M+H]+  | 2.257 |
| C45H87O7P   | 2 | 793.60520 | 770.61894 | [M+Na]+ | 3.736 |
| C44H87N2O6P | 1 | 793.61640 | 770.63018 | [M+Na]+ | 3.776 |
| C41H74NO10P | 1 | 794.49080 | 771.50504 | [M+Na]+ | 4.354 |
| C43H72NO10P | 1 | 794.49340 | 793.48939 | [M+H]+  | 4.101 |
| C41H77O12S  | 2 | 794.51970 | 793.51360 | [M+H]+  | 1.473 |
| C42H78NO9P  | 2 | 794.52870 | 771.54142 | [M+Na]+ | 2.447 |
| C45H80NO8P  | 4 | 794.56570 | 793.56216 | [M+H]+  | 4.692 |

|             |   |           |           |            |       |
|-------------|---|-----------|-----------|------------|-------|
| C43H82NO8P  | 3 | 794.56570 | 771.57781 | [M+Na]+    | 1.673 |
| C36H68O17   | 3 | 795.43670 | 772.44566 | [M+Na]+    | 2.292 |
| C48H68O8    | 1 | 795.48340 | 772.49142 | [M+Na]+    | 3.467 |
| C42H77O9P   | 1 | 795.49320 | 756.53052 | [M+K]+     | 0.596 |
| C45H72O10   | 1 | 795.50390 | 772.51255 | [M+Na]+    | 2.675 |
| C40H75O13P  | 2 | 795.50400 | 794.49453 | [M+H]+     | 2.761 |
| C44H75O10P  | 2 | 795.51860 | 794.50979 | [M+H]+     | 1.937 |
| C43H81O9P   | 3 | 795.54780 | 772.56182 | [M+Na]+    | 4.079 |
| C43H85N2O6P | 2 | 795.57510 | 756.61453 | [M+K]+     | 3.238 |
| C45H89O7P   | 1 | 795.62040 | 772.63459 | [M+Na]+    | 4.292 |
| C40H72NO10P | 1 | 796.45290 | 757.48939 | [M+K]+     | 0.455 |
| C45H76NO6P  | 1 | 796.50690 | 757.54103 | [M+K]+     | 3.417 |
| C43H74NO10P | 2 | 796.51070 | 795.50504 | [M+H]+     | 2.019 |
| C41H78NO10P | 1 | 796.51250 | 775.53634 | [M-2H+Na]- | 1.886 |
| C43H76NO10P | 1 | 796.51250 | 797.52069 | [M-H]-     | 1.153 |
| C45H76NO7P  | 1 | 796.52810 | 773.53594 | [M+Na]+    | 3.686 |
| C44H78NO9P  | 4 | 796.55120 | 795.54142 | [M+H]+     | 3.147 |
| C43H84NO8P  | 1 | 796.58570 | 773.59346 | [M+Na]+    | 3.792 |
| C45H82NO8P  | 1 | 796.58570 | 795.57781 | [M+H]+     | 0.781 |
| C44H88NO6P  | 1 | 796.59960 | 757.63493 | [M+K]+     | 1.911 |
| C44H88NO7P  | 2 | 796.61700 | 773.62984 | [M+Na]+    | 2.591 |
| C49H91NO4   | 1 | 796.65940 | 757.69481 | [M+K]+     | 1.808 |
| C47H66O9    | 1 | 797.45810 | 774.47070 | [M+Na]+    | 2.284 |
| C40H77O13P  | 3 | 797.51400 | 796.51018 | [M+H]+     | 4.331 |
| C45H74O10   | 2 | 797.51400 | 774.52820 | [M+Na]+    | 4.291 |
| C47H73O8P   | 1 | 797.51400 | 796.50431 | [M+H]+     | 3.036 |
| C47H72O10   | 4 | 797.52110 | 796.51255 | [M+H]+     | 1.604 |
| C42H79O10P  | 5 | 797.53360 | 774.54109 | [M+Na]+    | 4.125 |
| C44H77O10P  | 5 | 797.53360 | 796.52544 | [M+H]+     | 1.117 |
| C43H83O8P   | 1 | 797.54820 | 758.58256 | [M+K]+     | 3.123 |
| C41H81O12P  | 1 | 797.55070 | 796.54657 | [M+H]+     | 3.936 |
| C44H87O7P   | 1 | 797.58120 | 758.61894 | [M+K]+     | 1.121 |
| C43H87N2O6P | 1 | 797.59680 | 758.63018 | [M+K]+     | 4.356 |
| C44H87O8P   | 1 | 797.60040 | 774.61386 | [M+Na]+    | 3.360 |
| C43H72NO8P  | 1 | 798.45130 | 761.49956 | [M-2H+K]-  | 3.936 |
| C40H74NO10P | 1 | 798.46680 | 759.50504 | [M+K]+     | 1.738 |
| C45H78NO6P  | 1 | 798.51900 | 759.55668 | [M+K]+     | 1.037 |
| C43H76NO10P | 3 | 798.52480 | 797.52069 | [M+H]+     | 3.955 |
| C41H78NO10P | 2 | 798.52480 | 775.53634 | [M+Na]+    | 0.951 |
| C41H80NO10P | 1 | 798.52820 | 777.55199 | [M-2H+Na]- | 1.944 |
| C43H78NO10P | 1 | 798.52820 | 799.53634 | [M-H]-     | 1.087 |
| C42H82NO8P  | 1 | 798.53740 | 759.57781 | [M+K]+     | 4.456 |
| C45H78NO7P  | 1 | 798.53740 | 775.55159 | [M+Na]+    | 4.275 |
| C43H86NO8P  | 2 | 798.60230 | 775.60911 | [M+Na]+    | 4.972 |
| C45H84NO8P  | 3 | 798.60230 | 797.59346 | [M+H]+     | 1.968 |
| C44H90NO7P  | 1 | 798.63620 | 775.64549 | [M+Na]+    | 1.861 |
| C46H88NO7P  | 2 | 798.63620 | 797.62984 | [M+H]+     | 1.143 |
| C39H69O13P  | 2 | 799.43910 | 776.44758 | [M+Na]+    | 2.871 |
| C43H68O11   | 2 | 799.43910 | 760.47617 | [M+K]+     | 0.270 |
| C44H73O9P   | 1 | 799.48870 | 776.49922 | [M+Na]+    | 0.319 |
| C45H77O8P   | 1 | 799.52600 | 776.53561 | [M+Na]+    | 1.463 |
| C42H81O9P   | 1 | 799.52600 | 760.56182 | [M+K]+     | 1.283 |
| C45H76O10   | 1 | 799.53110 | 776.54385 | [M+Na]+    | 2.466 |

|             |   |           |           |                        |       |
|-------------|---|-----------|-----------|------------------------|-------|
| C47H74O10   | 1 | 799.53150 | 798.52820 | [M+H] <sup>+</sup>     | 4.967 |
| C42H81O10P  | 3 | 799.54990 | 776.55674 | [M+Na] <sup>+</sup>    | 4.928 |
| C44H79O10P  | 5 | 799.55130 | 798.54109 | [M+H] <sup>+</sup>     | 3.678 |
| C44H89O7P   | 1 | 799.60100 | 760.63459 | [M+K] <sup>+</sup>     | 4.072 |
| C46H87O8P   | 2 | 799.62190 | 798.61386 | [M+H] <sup>+</sup>     | 0.964 |
| C40H77NO11S | 1 | 800.49580 | 779.52174 | [M-2H+Na] <sup>-</sup> | 0.747 |
| C43H78NO10P | 3 | 800.54030 | 799.53634 | [M+H] <sup>+</sup>     | 4.132 |
| C43H80NO10P | 1 | 800.54500 | 801.55199 | [M-H] <sup>-</sup>     | 0.352 |
| C42H84NO8P  | 2 | 800.55300 | 761.59346 | [M+K] <sup>+</sup>     | 4.507 |
| C45H80NO7P  | 1 | 800.55590 | 777.56724 | [M+Na] <sup>+</sup>    | 0.705 |
| C42H84NO9P  | 1 | 800.57450 | 777.58837 | [M+Na] <sup>+</sup>    | 3.865 |
| C48H82NO6P  | 1 | 800.59330 | 799.58798 | [M+H] <sup>+</sup>     | 2.433 |
| C43H88NO7P  | 1 | 800.59330 | 761.62984 | [M+K] <sup>+</sup>     | 0.383 |
| C39H71O13P  | 1 | 801.45510 | 778.46323 | [M+Na] <sup>+</sup>    | 3.300 |
| C41H69O13P  | 1 | 801.45510 | 800.44758 | [M+H] <sup>+</sup>     | 0.307 |
| C44H75O8P   | 1 | 801.47990 | 762.51996 | [M+K] <sup>+</sup>     | 4.004 |
| C44H75O9P   | 2 | 801.50440 | 778.51487 | [M+Na] <sup>+</sup>    | 0.381 |
| C45H79O7P   | 2 | 801.51720 | 762.55634 | [M+K] <sup>+</sup>     | 2.862 |
| C45H78O10   | 1 | 801.55030 | 778.55950 | [M+Na] <sup>+</sup>    | 1.969 |
| C44H81O10P  | 1 | 801.56730 | 800.55674 | [M+H] <sup>+</sup>     | 4.106 |
| C49H94O6    | 1 | 801.69580 | 778.70504 | [M+Na] <sup>+</sup>    | 1.917 |
| C51H92O6    | 1 | 801.69580 | 800.68939 | [M+H] <sup>+</sup>     | 1.075 |
| C42H70NO10P | 2 | 802.46020 | 779.47374 | [M+Na] <sup>+</sup>    | 3.437 |
| C40H75O12S  | 2 | 802.48910 | 779.49790 | [M+Na] <sup>+</sup>    | 2.466 |
| C40H78NO10P | 1 | 802.49620 | 763.53634 | [M+K] <sup>+</sup>     | 4.097 |
| C43H74NO9P  | 2 | 802.49730 | 779.51012 | [M+Na] <sup>+</sup>    | 2.547 |
| C40H77NO11S | 2 | 802.50860 | 779.52174 | [M+Na] <sup>+</sup>    | 2.940 |
| C46H76NO8P  | 3 | 802.53570 | 801.53086 | [M+H] <sup>+</sup>     | 3.025 |
| C41H82NO9P  | 3 | 802.53570 | 763.57272 | [M+K] <sup>+</sup>     | 0.216 |
| C44H78NO8P  | 1 | 802.53570 | 779.54651 | [M+Na] <sup>+</sup>    | 0.036 |
| C43H80NO10P | 1 | 802.55620 | 801.55199 | [M+H] <sup>+</sup>     | 3.810 |
| C45H82NO7P  | 1 | 802.56980 | 779.58289 | [M+Na] <sup>+</sup>    | 2.883 |
| C44H84NO9P  | 2 | 802.59520 | 801.58837 | [M+H] <sup>+</sup>     | 0.552 |
| C48H84NO6P  | 2 | 802.61040 | 801.60363 | [M+H] <sup>+</sup>     | 0.620 |
| C45H88NO8P  | 1 | 802.63050 | 801.62476 | [M+H] <sup>+</sup>     | 1.904 |
| C39H74O11P2 | 1 | 803.45690 | 780.47064 | [M+Na] <sup>+</sup>    | 3.687 |
| C43H73O10P  | 1 | 803.48580 | 780.49414 | [M+Na] <sup>+</sup>    | 3.037 |
| C46H75O9P   | 1 | 803.52090 | 802.51487 | [M+H] <sup>+</sup>     | 1.548 |
| C41H81O10P  | 1 | 803.52090 | 764.55674 | [M+K] <sup>+</sup>     | 1.258 |
| C45H81O7P   | 1 | 803.53750 | 764.57199 | [M+K] <sup>+</sup>     | 2.932 |
| C52H76O4    | 2 | 803.53950 | 764.57436 | [M+K] <sup>+</sup>     | 2.475 |
| C47H79O8P   | 1 | 803.55570 | 802.55126 | [M+H] <sup>+</sup>     | 3.521 |
| C53H80O4    | 3 | 803.59690 | 780.60566 | [M+Na] <sup>+</sup>    | 2.511 |
| C42H74NO9P  | 1 | 804.45630 | 767.51012 | [M-2H+K] <sup>-</sup>  | 3.012 |
| C45H70NO8P  | 1 | 804.45630 | 783.48391 | [M-2H+Na] <sup>-</sup> | 2.818 |
| C42H72NO9P  | 1 | 804.45840 | 765.49447 | [M+K] <sup>+</sup>     | 0.966 |
| C42H72NO10P | 1 | 804.48120 | 781.48939 | [M+Na] <sup>+</sup>    | 3.221 |
| C44H70NO10P | 1 | 804.48120 | 803.47374 | [M+H] <sup>+</sup>     | 0.240 |
| C46H78NO8P  | 2 | 804.55770 | 803.54651 | [M+H] <sup>+</sup>     | 4.875 |
| C44H86NO9P  | 1 | 804.61180 | 803.60402 | [M+H] <sup>+</sup>     | 0.630 |
| C46H94NO7P  | 1 | 804.68760 | 803.67679 | [M+H] <sup>+</sup>     | 4.396 |
| C38H54O16   | 2 | 805.30240 | 766.34119 | [M+K] <sup>+</sup>     | 2.410 |
| C39H75O12P  | 2 | 805.46410 | 766.49962 | [M+K] <sup>+</sup>     | 1.652 |

|                |   |           |           |                        |       |
|----------------|---|-----------|-----------|------------------------|-------|
| C41H73O13P     | 1 | 805.48970 | 804.47888 | [M+H] <sup>+</sup>     | 4.402 |
| C45H73O10P     | 2 | 805.49880 | 804.49414 | [M+H] <sup>+</sup>     | 3.239 |
| C40H79O12P     | 1 | 805.52190 | 782.53092 | [M+Na] <sup>+</sup>    | 2.185 |
| C42H77O12P     | 1 | 805.52190 | 804.51527 | [M+H] <sup>+</sup>     | 0.793 |
| C47H81O8P      | 1 | 805.57060 | 804.56691 | [M+H] <sup>+</sup>     | 4.443 |
| C45H83O8P      | 1 | 805.57060 | 782.58256 | [M+Na] <sup>+</sup>    | 1.465 |
| C51H96O6       | 1 | 805.72900 | 804.72069 | [M+H] <sup>+</sup>     | 1.288 |
| C45H70NO8P     | 3 | 806.47290 | 783.48391 | [M+Na] <sup>+</sup>    | 0.283 |
| C44H72NO10P    | 1 | 806.49430 | 805.48939 | [M+H] <sup>+</sup>     | 2.924 |
| C47H84NO7P     | 1 | 806.60220 | 805.59854 | [M+H] <sup>+</sup>     | 4.479 |
| C48H88NO6P     | 1 | 806.64400 | 805.63493 | [M+H] <sup>+</sup>     | 2.234 |
| C39H77O12P     | 2 | 807.47780 | 768.51527 | [M+K] <sup>+</sup>     | 0.767 |
| C41H75O13P     | 3 | 807.50480 | 806.49453 | [M+H] <sup>+</sup>     | 3.710 |
| C45H75O10P     | 3 | 807.51880 | 806.50979 | [M+H] <sup>+</sup>     | 2.156 |
| C47H83O8P      | 1 | 807.58820 | 806.58256 | [M+H] <sup>+</sup>     | 2.017 |
| C45H85O8P      | 1 | 807.58820 | 784.59821 | [M+Na] <sup>+</sup>    | 0.953 |
| C56H80O2       | 2 | 807.60290 | 784.61583 | [M+Na] <sup>+</sup>    | 2.665 |
| C44H87O10P     | 1 | 807.60830 | 806.60369 | [M+H] <sup>+</sup>     | 3.292 |
| C45H91O9P      | 1 | 807.64850 | 806.64007 | [M+H] <sup>+</sup>     | 1.431 |
| C46H95O8P      | 1 | 807.68730 | 806.67646 | [M+H] <sup>+</sup>     | 4.421 |
| C41H74NO10P    | 1 | 808.45460 | 771.50504 | [M-2H+K] <sup>-</sup>  | 1.190 |
| C41H72NO10P    | 1 | 808.45560 | 769.48939 | [M+K] <sup>+</sup>     | 3.787 |
| C42H76NO10P    | 2 | 808.50750 | 785.52069 | [M+Na] <sup>+</sup>    | 2.980 |
| C44H74NO10P    | 1 | 808.51590 | 807.50504 | [M+H] <sup>+</sup>     | 4.443 |
| C45H78NO9P     | 1 | 808.54700 | 807.54142 | [M+H] <sup>+</sup>     | 2.094 |
| C43H80NO9P     | 1 | 808.54700 | 785.55707 | [M+Na] <sup>+</sup>    | 0.873 |
| C46H82NO8P     | 2 | 808.58820 | 807.57781 | [M+H] <sup>+</sup>     | 3.861 |
| C47H86NO7P     | 1 | 808.62180 | 807.61419 | [M+H] <sup>+</sup>     | 0.417 |
| C39H62O15      | 1 | 809.36800 | 770.40888 | [M+K] <sup>+</sup>     | 4.974 |
| C45H77O10P     | 1 | 809.52950 | 808.52544 | [M+H] <sup>+</sup>     | 3.964 |
| C43H79O10P     | 1 | 809.52950 | 786.54109 | [M+Na] <sup>+</sup>    | 1.001 |
| C44H83O8P      | 1 | 809.54390 | 770.58256 | [M+K] <sup>+</sup>     | 2.235 |
| C42H81O12P     | 2 | 809.55510 | 808.54657 | [M+H] <sup>+</sup>     | 1.558 |
| C44H83O9P      | 1 | 809.56490 | 786.57747 | [M+Na] <sup>+</sup>    | 2.217 |
| C45H91N2O6P    | 1 | 809.64740 | 786.66148 | [M+Na] <sup>+</sup>    | 4.072 |
| C23H38N7O17P3S | 2 | 810.13640 | 809.12578 | [M+H] <sup>+</sup>     | 4.133 |
| C42H78NO9P     | 1 | 810.50140 | 771.54142 | [M+K] <sup>+</sup>     | 3.915 |
| C47H72NO8P     | 1 | 810.50490 | 809.49956 | [M+H] <sup>+</sup>     | 2.378 |
| C42H80NO10P    | 1 | 810.52880 | 789.55199 | [M-2H+Na] <sup>-</sup> | 2.655 |
| C46H79NO8      | 1 | 810.52880 | 773.58057 | [M-2H+K] <sup>-</sup>  | 0.456 |
| C44H78NO10P    | 1 | 810.52880 | 811.53634 | [M-H] <sup>-</sup>     | 0.331 |
| C43H82NO8P     | 1 | 810.53950 | 771.57781 | [M+K] <sup>+</sup>     | 1.799 |
| C46H78NO7P     | 1 | 810.53950 | 787.55159 | [M+Na] <sup>+</sup>    | 1.621 |
| C44H86NO7P     | 2 | 810.58030 | 771.61419 | [M+K] <sup>+</sup>     | 3.648 |
| C45H90NO7P     | 1 | 810.63870 | 787.64549 | [M+Na] <sup>+</sup>    | 4.917 |
| C47H88NO7P     | 2 | 810.63870 | 809.62984 | [M+H] <sup>+</sup>     | 1.958 |
| C48H91NO8      | 1 | 810.68510 | 809.67447 | [M+H] <sup>+</sup>     | 4.145 |
| C48H93NO8      | 1 | 810.68680 | 811.69012 | [M-H] <sup>-</sup>     | 4.872 |
| C40H69O13P     | 1 | 811.43890 | 788.44758 | [M+Na] <sup>+</sup>    | 2.582 |
| C41H79O13P     | 1 | 811.53570 | 810.52583 | [M+H] <sup>+</sup>     | 3.199 |
| C43H81O10P     | 1 | 811.54360 | 788.55674 | [M+Na] <sup>+</sup>    | 2.908 |
| C45H79O10P     | 1 | 811.55030 | 810.54109 | [M+H] <sup>+</sup>     | 2.392 |
| C42H83O12P     | 1 | 811.56820 | 810.56222 | [M+H] <sup>+</sup>     | 1.588 |

|               |   |           |           |                        |       |
|---------------|---|-----------|-----------|------------------------|-------|
| C46H83O9P     | 1 | 811.58100 | 810.57747 | [M+H] <sup>+</sup>     | 4.613 |
| C44H85O9P     | 1 | 811.58100 | 788.59312 | [M+Na] <sup>+</sup>    | 1.657 |
| C45H89O7P     | 1 | 811.59950 | 772.63459 | [M+K] <sup>+</sup>     | 2.164 |
| C44H89N2O6P   | 1 | 811.60870 | 772.64583 | [M+K] <sup>+</sup>     | 0.340 |
| C45H89O8P     | 1 | 811.61600 | 788.62951 | [M+Na] <sup>+</sup>    | 3.364 |
| C41H76NO10P   | 1 | 812.48390 | 773.52069 | [M+K] <sup>+</sup>     | 0.076 |
| C47H74NO8P    | 1 | 812.52250 | 811.51521 | [M+H] <sup>+</sup>     | 0.027 |
| C42H80NO10P   | 1 | 812.54280 | 789.55199 | [M+Na] <sup>+</sup>    | 1.958 |
| C44H78NO10P   | 2 | 812.54370 | 811.53634 | [M+H] <sup>+</sup>     | 0.113 |
| C46H79NO8     | 2 | 812.54370 | 773.58057 | [M+K] <sup>+</sup>     | 0.025 |
| C43H84NO9P    | 1 | 812.57910 | 789.58837 | [M+Na] <sup>+</sup>    | 1.853 |
| C44H88NO8P    | 1 | 812.61030 | 789.62476 | [M+Na] <sup>+</sup>    | 4.527 |
| C50H85NO7     | 1 | 812.64160 | 811.63261 | [M+H] <sup>+</sup>     | 2.123 |
| C45H92NO7P    | 3 | 812.65260 | 789.66114 | [M+Na] <sup>+</sup>    | 2.751 |
| C47H90NO7P    | 3 | 812.65260 | 811.64549 | [M+H] <sup>+</sup>     | 0.201 |
| C48H95NO8     | 1 | 812.69460 | 813.70577 | [M-H] <sup>-</sup>     | 4.799 |
| C47H66O9      | 1 | 813.43360 | 774.47070 | [M+K] <sup>+</sup>     | 0.307 |
| C40H71O13P    | 1 | 813.45530 | 790.46323 | [M+Na] <sup>+</sup>    | 3.497 |
| C42H68O15     | 1 | 813.46440 | 812.45583 | [M+H] <sup>+</sup>     | 1.603 |
| C45H75O8P     | 1 | 813.48540 | 774.51996 | [M+K] <sup>+</sup>     | 2.816 |
| C45H76O7P2    | 1 | 813.49730 | 790.50663 | [M+Na] <sup>+</sup>    | 1.780 |
| C46H79O8P     | 1 | 813.54100 | 790.55126 | [M+Na] <sup>+</sup>    | 0.639 |
| C43H83O9P     | 1 | 813.54100 | 774.57747 | [M+K] <sup>+</sup>     | 0.462 |
| C47H89O8P     | 1 | 813.63470 | 812.62951 | [M+H] <sup>+</sup>     | 2.555 |
| C52H92O6      | 1 | 813.70030 | 812.68939 | [M+H] <sup>+</sup>     | 4.471 |
| C29H51N3O18P2 | 1 | 814.25440 | 791.26429 | [M+Na] <sup>+</sup>    | 1.089 |
| C42H66NO10P   | 1 | 814.40620 | 775.44244 | [M+K] <sup>+</sup>     | 0.753 |
| C43H70NO10P   | 1 | 814.46690 | 791.47374 | [M+Na] <sup>+</sup>    | 4.840 |
| C41H75O12S    | 2 | 814.48640 | 791.49790 | [M+Na] <sup>+</sup>    | 0.885 |
| C41H80NO10P   | 2 | 814.49700 | 777.55199 | [M-2H+K] <sup>-</sup>  | 4.405 |
| C44H76NO9P    | 2 | 814.49700 | 793.52577 | [M-2H+Na] <sup>-</sup> | 4.215 |
| C45H78NO8P    | 1 | 814.53960 | 791.54651 | [M+Na] <sup>+</sup>    | 4.752 |
| C42H82NO9P    | 1 | 814.53960 | 775.57272 | [M+K] <sup>+</sup>     | 4.576 |
| C47H76NO8P    | 1 | 814.53960 | 813.53086 | [M+H] <sup>+</sup>     | 1.807 |
| C44H80NO10P   | 1 | 814.55700 | 813.55199 | [M+H] <sup>+</sup>     | 2.772 |
| C42H82NO10P   | 1 | 814.55700 | 791.56764 | [M+Na] <sup>+</sup>    | 0.173 |
| C46H88NO8P    | 1 | 814.62970 | 813.62476 | [M+H] <sup>+</sup>     | 2.858 |
| C47H92NO7P    | 1 | 814.67020 | 813.66114 | [M+H] <sup>+</sup>     | 2.194 |
| C47H69O8P     | 1 | 815.46390 | 792.47301 | [M+Na] <sup>+</sup>    | 2.048 |
| C44H73O9P     | 2 | 815.46640 | 776.49922 | [M+K] <sup>+</sup>     | 4.937 |
| C40H73O13P    | 2 | 815.46640 | 792.47888 | [M+Na] <sup>+</sup>    | 2.091 |
| C46H71O10P    | 1 | 815.48860 | 814.47849 | [M+H] <sup>+</sup>     | 3.484 |
| C41H77O12P    | 1 | 815.50070 | 792.51527 | [M+Na] <sup>+</sup>    | 4.647 |
| C45H77O8P     | 1 | 815.50070 | 776.53561 | [M+K] <sup>+</sup>     | 2.380 |
| C43H75O12P    | 1 | 815.50710 | 814.49962 | [M+H] <sup>+</sup>     | 0.259 |
| C44H89O9P     | 2 | 815.61720 | 792.62442 | [M+Na] <sup>+</sup>    | 4.359 |
| C46H87O9P     | 2 | 815.61720 | 814.60877 | [M+H] <sup>+</sup>     | 1.417 |
| C51H90O7      | 1 | 815.67280 | 814.66866 | [M+H] <sup>+</sup>     | 3.834 |
| C47H95N2O6P   | 1 | 815.69600 | 814.69278 | [M+H] <sup>+</sup>     | 4.961 |
| C52H94O6      | 2 | 815.71030 | 814.70504 | [M+H] <sup>+</sup>     | 2.467 |
| C44H76NO8P    | 1 | 816.49420 | 777.53086 | [M+K] <sup>+</sup>     | 0.235 |
| C44H76NO9P    | 3 | 816.51720 | 793.52577 | [M+Na] <sup>+</sup>    | 2.702 |
| C41H80NO10P   | 1 | 816.51720 | 777.55199 | [M+K] <sup>+</sup>     | 2.525 |

|             |   |           |           |            |       |
|-------------|---|-----------|-----------|------------|-------|
| C45H80NO8P  | 1 | 816.55530 | 793.56216 | [M+Na]+    | 4.802 |
| C47H78NO8P  | 1 | 816.55530 | 815.54651 | [M+H]+     | 1.864 |
| C44H82NO10P | 1 | 816.57800 | 815.56764 | [M+H]+     | 3.787 |
| C48H82NO7P  | 1 | 816.58670 | 815.58289 | [M+H]+     | 4.241 |
| C46H84NO7P  | 1 | 816.58670 | 793.59854 | [M+Na]+    | 1.303 |
| C45H86NO9P  | 1 | 816.60790 | 815.60402 | [M+H]+     | 4.155 |
| C40H75O12P  | 1 | 817.46640 | 778.49962 | [M+K]+     | 4.442 |
| C44H75O9P   | 2 | 817.47840 | 778.51487 | [M+K]+     | 0.460 |
| C45H79O8P   | 1 | 817.51120 | 778.55126 | [M+K]+     | 3.925 |
| C45H85O10P  | 1 | 817.59560 | 816.58804 | [M+H]+     | 0.356 |
| C54H82O4    | 1 | 817.61390 | 794.62131 | [M+Na]+    | 4.119 |
| C47H93O8P   | 3 | 817.66640 | 816.66081 | [M+H]+     | 2.053 |
| C49H94O6    | 1 | 817.66890 | 778.70504 | [M+K]+     | 0.866 |
| C52H96O6    | 1 | 817.72480 | 816.72069 | [M+H]+     | 3.867 |
| C40H77NO11S | 1 | 818.48640 | 779.52174 | [M+K]+     | 1.847 |
| C43H74NO10P | 1 | 818.49630 | 795.50504 | [M+Na]+    | 2.494 |
| C45H72NO10P | 2 | 818.49630 | 817.48939 | [M+H]+     | 0.437 |
| C47H80NO8P  | 1 | 818.57180 | 817.56216 | [M+H]+     | 2.898 |
| C44H84NO10P | 1 | 818.58800 | 817.58329 | [M+H]+     | 3.125 |
| C48H84NO7P  | 1 | 818.60370 | 817.59854 | [M+H]+     | 2.581 |
| C46H86NO7P  | 1 | 818.60370 | 795.61419 | [M+Na]+    | 0.349 |
| C45H88NO9P  | 3 | 818.62320 | 817.61967 | [M+H]+     | 4.572 |
| C47H89NO8   | 1 | 818.64820 | 795.65882 | [M+Na]+    | 0.194 |
| C47H96NO7P  | 1 | 818.69720 | 817.69244 | [M+H]+     | 3.070 |
| C41H64O15   | 1 | 819.41440 | 796.42453 | [M+Na]+    | 0.797 |
| C39H74O11P2 | 1 | 819.43490 | 780.47064 | [M+K]+     | 1.353 |
| C39H73O13P  | 1 | 819.43850 | 780.47888 | [M+K]+     | 4.313 |
| C40H77O12P  | 1 | 819.47500 | 780.51527 | [M+K]+     | 4.172 |
| C44H77O10P  | 1 | 819.51270 | 796.52544 | [M+Na]+    | 2.392 |
| C46H75O10P  | 5 | 819.51610 | 818.50979 | [M+H]+     | 1.170 |
| C44H82O13   | 1 | 819.57970 | 818.57555 | [M+H]+     | 3.803 |
| C45H87O10P  | 1 | 819.61220 | 818.60369 | [M+H]+     | 1.514 |
| C46H91O9P   | 1 | 819.64950 | 818.64007 | [M+H]+     | 2.630 |
| C57H86O3    | 2 | 819.66410 | 818.65770 | [M+H]+     | 1.057 |
| C52H98O6    | 1 | 819.74290 | 818.73634 | [M+H]+     | 0.869 |
| C43H78NO9P  | 1 | 820.48730 | 783.54142 | [M-2H+K]-  | 3.319 |
| C46H74NO8P  | 1 | 820.48730 | 799.51521 | [M-2H+Na]- | 3.130 |
| C43H76NO10P | 1 | 820.50590 | 797.52069 | [M+Na]+    | 4.886 |
| C45H74NO10P | 3 | 820.51250 | 819.50504 | [M+H]+     | 0.234 |
| C46H78NO9P  | 1 | 820.54640 | 819.54142 | [M+H]+     | 2.794 |
| C44H80NO9P  | 1 | 820.54640 | 797.55707 | [M+Na]+    | 0.129 |
| C45H84NO7P  | 1 | 820.56440 | 781.59854 | [M+K]+     | 3.299 |
| C47H82NO8P  | 1 | 820.58860 | 819.57781 | [M+H]+     | 4.292 |
| C39H75O13P  | 4 | 821.45530 | 782.49453 | [M+K]+     | 2.902 |
| C40H79O12P  | 1 | 821.49070 | 782.53092 | [M+K]+     | 4.101 |
| C44H79O9P   | 3 | 821.51300 | 782.54617 | [M+K]+     | 4.475 |
| C42H77O13P  | 2 | 821.51720 | 820.51018 | [M+H]+     | 0.309 |
| C47H74O10   | 1 | 821.51720 | 798.52820 | [M+Na]+    | 0.270 |
| C46H77O10P  | 1 | 821.53530 | 820.52544 | [M+H]+     | 3.154 |
| C43H81O12P  | 2 | 821.55480 | 820.54657 | [M+H]+     | 1.170 |
| C45H82O10   | 1 | 821.55480 | 782.59080 | [M+K]+     | 1.033 |
| C45H89N2O6P | 1 | 821.59750 | 784.64583 | [M-2H+K]-  | 3.742 |
| C45H89O10P  | 1 | 821.62320 | 820.61934 | [M+H]+     | 4.149 |

|             |   |           |           |                        |       |
|-------------|---|-----------|-----------|------------------------|-------|
| C46H93O9P   | 1 | 821.66080 | 820.65572 | [M+H] <sup>+</sup>     | 2.670 |
| C46H95O9P   | 1 | 821.66100 | 822.67137 | [M-H] <sup>-</sup>     | 3.778 |
| C51H92O6    | 1 | 821.66100 | 800.68939 | [M-2H+Na] <sup>-</sup> | 3.714 |
| C52H100O6   | 1 | 821.75710 | 820.75199 | [M+H] <sup>+</sup>     | 2.631 |
| C45H70NO8P  | 1 | 822.44490 | 783.48391 | [M+K] <sup>+</sup>     | 2.623 |
| C45H76NO10P | 3 | 822.52760 | 821.52069 | [M+H] <sup>+</sup>     | 0.435 |
| C44H82NO9P  | 1 | 822.55960 | 799.57272 | [M+Na] <sup>+</sup>    | 2.850 |
| C46H80NO9P  | 1 | 822.56720 | 821.55707 | [M+H] <sup>+</sup>     | 3.473 |
| C48H82NO6P  | 1 | 822.57760 | 799.58798 | [M+Na] <sup>+</sup>    | 0.487 |
| C45H86NO8P  | 2 | 822.60200 | 799.60911 | [M+Na] <sup>+</sup>    | 4.463 |
| C47H84NO8P  | 1 | 822.60200 | 821.59346 | [M+H] <sup>+</sup>     | 1.546 |
| C46H90NO7P  | 2 | 822.63850 | 799.64549 | [M+Na] <sup>+</sup>    | 4.602 |
| C48H88NO7P  | 1 | 822.63850 | 821.62984 | [M+H] <sup>+</sup>     | 1.686 |
| C36H64O18   | 1 | 823.37430 | 784.40927 | [M+K] <sup>+</sup>     | 2.282 |
| C43H77O10P  | 1 | 823.48760 | 784.52544 | [M+K] <sup>+</sup>     | 1.201 |
| C44H81O10P  | 2 | 823.54840 | 800.55674 | [M+Na] <sup>+</sup>    | 2.963 |
| C46H79O10P  | 1 | 823.54840 | 822.54109 | [M+H] <sup>+</sup>     | 0.050 |
| C43H83O12P  | 1 | 823.57090 | 822.56222 | [M+H] <sup>+</sup>     | 1.713 |
| C43H85O12P  | 1 | 823.57370 | 824.57787 | [M-H] <sup>-</sup>     | 3.765 |
| C45H89N2O6P | 1 | 823.61040 | 784.64583 | [M+K] <sup>+</sup>     | 1.729 |
| C46H93N2O6P | 1 | 823.66860 | 800.67713 | [M+Na] <sup>+</sup>    | 2.734 |
| C46H95O9P   | 2 | 823.67980 | 822.67137 | [M+H] <sup>+</sup>     | 1.403 |
| C51H92O6    | 1 | 823.68270 | 800.68939 | [M+Na] <sup>+</sup>    | 4.962 |
| C44H68NO10P | 1 | 824.44500 | 801.45809 | [M+Na] <sup>+</sup>    | 2.799 |
| C43H82NO9P  | 4 | 824.51790 | 787.57272 | [M-2H+K] <sup>-</sup>  | 4.151 |
| C46H78NO8P  | 4 | 824.51790 | 803.54651 | [M-2H+Na] <sup>-</sup> | 3.964 |
| C48H76NO8P  | 3 | 824.52020 | 825.53086 | [M-H] <sup>-</sup>     | 4.109 |
| C43H80NO10P | 2 | 824.54150 | 801.55199 | [M+Na] <sup>+</sup>    | 0.353 |
| C45H78NO10P | 4 | 824.54570 | 823.53634 | [M+H] <sup>+</sup>     | 2.537 |
| C44H84NO9P  | 1 | 824.57580 | 801.58837 | [M+Na] <sup>+</sup>    | 2.176 |
| C48H83NO7   | 1 | 824.57640 | 785.61696 | [M+K] <sup>+</sup>     | 4.493 |
| C46H82NO9P  | 1 | 824.57640 | 823.57272 | [M+H] <sup>+</sup>     | 4.357 |
| C47H86NO8P  | 1 | 824.61580 | 823.60911 | [M+H] <sup>+</sup>     | 0.701 |
| C40H66O16   | 1 | 825.42320 | 802.43509 | [M+Na] <sup>+</sup>    | 1.347 |
| C46H77O9P   | 1 | 825.50570 | 804.53052 | [M-2H+Na] <sup>-</sup> | 0.625 |
| C43H81O10P  | 1 | 825.50570 | 788.55674 | [M-2H+K] <sup>-</sup>  | 0.437 |
| C46H81O10P  | 1 | 825.56040 | 824.55674 | [M+H] <sup>+</sup>     | 4.372 |
| C44H83O10P  | 1 | 825.56040 | 802.57239 | [M+Na] <sup>+</sup>    | 1.466 |
| C51H94O6    | 3 | 825.69690 | 802.70504 | [M+Na] <sup>+</sup>    | 3.194 |
| C53H92O6    | 2 | 825.69690 | 824.68939 | [M+H] <sup>+</sup>     | 0.288 |
| C45H76NO8P  | 1 | 826.48200 | 789.53086 | [M-2H+K] <sup>-</sup>  | 3.076 |
| C42H78NO10P | 1 | 826.50160 | 787.53634 | [M+K] <sup>+</sup>     | 2.555 |
| C46H78NO7P  | 1 | 826.51120 | 787.55159 | [M+K] <sup>+</sup>     | 4.287 |
| C48H76NO8P  | 2 | 826.53430 | 825.53086 | [M+H] <sup>+</sup>     | 4.631 |
| C43H82NO9P  | 2 | 826.53430 | 787.57272 | [M+K] <sup>+</sup>     | 1.903 |
| C46H78NO8P  | 1 | 826.53560 | 803.54651 | [M+Na] <sup>+</sup>    | 0.156 |
| C43H82NO10P | 1 | 826.55880 | 803.56764 | [M+Na] <sup>+</sup>    | 2.348 |
| C45H80NO10P | 2 | 826.56120 | 825.55199 | [M+H] <sup>+</sup>     | 2.349 |
| C47H88NO8P  | 2 | 826.62820 | 825.62476 | [M+H] <sup>+</sup>     | 4.631 |
| C45H90NO8P  | 2 | 826.62820 | 803.64041 | [M+Na] <sup>+</sup>    | 1.729 |
| C40H68O15   | 1 | 827.41820 | 788.45583 | [M+K] <sup>+</sup>     | 0.938 |
| C43H71O13P  | 1 | 827.46980 | 826.46323 | [M+H] <sup>+</sup>     | 0.851 |
| C45H75O10P  | 1 | 827.48510 | 806.50979 | [M-2H+Na] <sup>-</sup> | 0.787 |

|                |   |           |           |            |       |
|----------------|---|-----------|-----------|------------|-------|
| C40H78O13P2    | 1 | 827.48510 | 828.49177 | [M-H]-     | 0.724 |
| C43H83O10P     | 2 | 827.51970 | 790.57239 | [M-2H+K]-  | 1.558 |
| C46H79O9P      | 2 | 827.51970 | 806.54617 | [M-2H+Na]- | 1.370 |
| C44H85O9P      | 1 | 827.55480 | 788.59312 | [M+K]+     | 1.781 |
| C46H83O10P     | 1 | 827.58270 | 826.57239 | [M+H]+     | 3.675 |
| C45H93N2O6P    | 1 | 827.64060 | 788.67713 | [M+K]+     | 0.390 |
| C53H94O6       | 1 | 827.70990 | 826.70504 | [M+H]+     | 2.914 |
| C46H70NO10P    | 1 | 828.48380 | 827.47374 | [M+H]+     | 3.371 |
| C42H80NO10P    | 1 | 828.51310 | 789.55199 | [M+K]+     | 2.460 |
| C46H80NO7P     | 2 | 828.53280 | 789.56724 | [M+K]+     | 2.905 |
| C42H79NO13     | 2 | 828.54410 | 805.55515 | [M+Na]+    | 0.321 |
| C46H80NO8P     | 1 | 828.55490 | 805.56216 | [M+Na]+    | 4.250 |
| C43H84NO9P     | 1 | 828.55490 | 789.58837 | [M+K]+     | 4.076 |
| C48H78NO8P     | 2 | 828.55490 | 827.54651 | [M+H]+     | 1.354 |
| C45H82NO10P    | 1 | 828.57750 | 827.56764 | [M+H]+     | 3.128 |
| C47H84NO7P     | 2 | 828.58570 | 805.59854 | [M+Na]+    | 2.491 |
| C46H86NO9P     | 1 | 828.61420 | 827.60402 | [M+H]+     | 3.508 |
| C47H90NO8P     | 1 | 828.65010 | 827.64041 | [M+H]+     | 2.923 |
| C48H94NO7P     | 1 | 828.68750 | 827.67679 | [M+H]+     | 4.148 |
| C44H71O10P     | 1 | 829.44550 | 790.47849 | [M+K]+     | 4.655 |
| C41H77O12P     | 1 | 829.46200 | 792.51527 | [M-2H+K]-  | 2.253 |
| C45H76O7P2     | 1 | 829.47380 | 790.50663 | [M+K]+     | 4.845 |
| C46H79O9P      | 1 | 829.53950 | 806.54617 | [M+Na]+    | 4.949 |
| C43H83O10P     | 1 | 829.53950 | 790.57239 | [M+K]+     | 4.775 |
| C45H91O9P      | 1 | 829.62730 | 806.64007 | [M+Na]+    | 2.405 |
| C51H98O6       | 1 | 829.72700 | 806.73634 | [M+Na]+    | 1.732 |
| C53H96O6       | 1 | 829.72700 | 828.72069 | [M+H]+     | 1.159 |
| C23H38N7O17P3S | 1 | 830.09840 | 809.12578 | [M-2H+Na]- | 2.460 |
| C44H74NO10P    | 3 | 830.49620 | 807.50504 | [M+Na]+    | 2.337 |
| C46H72NO10P    | 2 | 830.49620 | 829.48939 | [M+H]+     | 0.551 |
| C42H82NO10P    | 1 | 830.53190 | 791.56764 | [M+K]+     | 1.339 |
| C42H81NO11S    | 1 | 830.53990 | 807.55304 | [M+Na]+    | 2.840 |
| C45H84NO10P    | 1 | 830.59120 | 829.58329 | [M+H]+     | 0.773 |
| C46H88NO9P     | 1 | 830.62900 | 829.61967 | [M+H]+     | 2.476 |
| C47H92NO8P     | 2 | 830.66440 | 829.65606 | [M+H]+     | 1.291 |
| C48H96NO7P     | 1 | 830.70060 | 829.69244 | [M+H]+     | 1.068 |
| C42H64O14      | 1 | 831.39220 | 792.42961 | [M+K]+     | 0.675 |
| C47H69O8P      | 1 | 831.43270 | 792.47301 | [M+K]+     | 4.160 |
| C41H77O13P     | 2 | 831.49530 | 808.51018 | [M+Na]+    | 4.937 |
| C44H89O9P      | 1 | 831.58650 | 792.62442 | [M+K]+     | 1.292 |
| C47H85O8P      | 2 | 831.58770 | 808.59821 | [M+Na]+    | 0.325 |
| C46H87O10P     | 1 | 831.61460 | 830.60369 | [M+H]+     | 4.378 |
| C23H38N7O17P3S | 1 | 832.11750 | 809.12578 | [M+Na]+    | 3.001 |
| C44H76NO10P    | 3 | 832.50790 | 809.52069 | [M+Na]+    | 2.413 |
| C46H74NO10P    | 1 | 832.50860 | 831.50504 | [M+H]+     | 4.454 |
| C44H78NO10P    | 1 | 832.50890 | 811.53634 | [M-2H+Na]- | 2.520 |
| C46H84NO8P     | 1 | 832.58400 | 809.59346 | [M+Na]+    | 1.587 |
| C48H82NO8P     | 2 | 832.58870 | 831.57781 | [M+H]+     | 4.350 |
| C45H86NO10P    | 1 | 832.60250 | 831.59894 | [M+H]+     | 4.453 |
| C46H90NO9P     | 1 | 832.64200 | 831.63532 | [M+H]+     | 0.712 |
| C47H94NO8P     | 1 | 832.67490 | 831.67171 | [M+H]+     | 4.897 |
| C41H79O12P     | 3 | 833.49820 | 794.53092 | [M+K]+     | 4.956 |
| C46H83O8P      | 2 | 833.54410 | 794.58256 | [M+K]+     | 1.930 |



|               |   |           |           |            |       |
|---------------|---|-----------|-----------|------------|-------|
| C42H83O12P    | 2 | 833.55070 | 810.56222 | [M+Na]+    | 0.888 |
| C44H81O12P    | 3 | 833.55170 | 832.54657 | [M+H]+     | 2.566 |
| C46H83O9P     | 3 | 833.56400 | 810.57747 | [M+Na]+    | 3.233 |
| C47H87O8P     | 1 | 833.60380 | 810.61386 | [M+Na]+    | 0.864 |
| C47H91N2O6P   | 2 | 833.65230 | 810.66148 | [M+Na]+    | 1.923 |
| C47H93O9P     | 2 | 833.66550 | 832.65572 | [M+H]+     | 3.006 |
| C31H53N3O19P2 | 3 | 834.28030 | 833.27486 | [M+H]+     | 2.190 |
| C43H74NO10P   | 1 | 834.46910 | 795.50504 | [M+K]+     | 1.093 |
| C40H77NO12S   | 1 | 834.47760 | 795.51665 | [M+K]+     | 2.640 |
| C46H76NO10P   | 2 | 834.52400 | 833.52069 | [M+H]+     | 4.743 |
| C44H78NO10P   | 2 | 834.52400 | 811.53634 | [M+Na]+    | 1.868 |
| C45H82NO8P    | 2 | 834.53760 | 795.57781 | [M+K]+     | 4.024 |
| C50H85NO7     | 2 | 834.62190 | 811.63261 | [M+Na]+    | 0.089 |
| C45H88NO10P   | 2 | 834.62190 | 833.61459 | [M+H]+     | 0.050 |
| C46H92NO9P    | 2 | 834.65710 | 833.65097 | [M+H]+     | 1.369 |
| C41H64O15     | 1 | 835.39050 | 796.42453 | [M+K]+     | 3.380 |
| C42H68O15     | 1 | 835.44700 | 812.45583 | [M+Na]+    | 2.338 |
| C47H74O10     | 1 | 835.47280 | 798.52820 | [M-2H+K]-  | 4.789 |
| C43H75O12P    | 1 | 835.47280 | 814.49962 | [M-2H+Na]- | 1.770 |
| C40H77O13P    | 1 | 835.47680 | 796.51018 | [M+K]+     | 4.149 |
| C47H72O10     | 1 | 835.47780 | 796.51255 | [M+K]+     | 2.512 |
| C41H81O12P    | 1 | 835.51350 | 796.54657 | [M+K]+     | 4.525 |
| C43H79O13P    | 2 | 835.53140 | 834.52583 | [M+H]+     | 2.039 |
| C44H83O12P    | 1 | 835.57090 | 834.56222 | [M+H]+     | 1.689 |
| C46H91O10P    | 1 | 835.63950 | 834.63499 | [M+H]+     | 3.302 |
| C44H82NO9P    | 1 | 836.51730 | 799.57272 | [M-2H+K]-  | 4.809 |
| C47H78NO8P    | 1 | 836.51730 | 815.54651 | [M-2H+Na]- | 4.624 |
| C44H80NO9P    | 1 | 836.52190 | 797.55707 | [M+K]+     | 2.005 |
| C49H74NO8P    | 1 | 836.52190 | 835.51521 | [M+H]+     | 0.691 |
| C46H80NO10P   | 1 | 836.54180 | 837.55199 | [M-H]-     | 3.488 |
| C44H82NO10P   | 1 | 836.54180 | 815.56764 | [M-2H+Na]- | 0.595 |
| C46H78NO10P   | 1 | 836.54210 | 835.53634 | [M+H]+     | 1.803 |
| C48H80NO7P    | 1 | 836.55490 | 813.56724 | [M+Na]+    | 1.870 |
| C44H85NO11S   | 1 | 836.59390 | 835.58434 | [M+H]+     | 2.740 |
| C46H88NO7P    | 1 | 836.59390 | 797.62984 | [M+K]+     | 1.084 |
| C44H85NO13    | 1 | 836.60840 | 835.60210 | [M+H]+     | 1.153 |
| C47H91NO8     | 1 | 836.64120 | 797.67447 | [M+K]+     | 4.279 |
| C47H92NO7P    | 1 | 836.64680 | 813.66114 | [M+Na]+    | 4.260 |
| C42H71O13P    | 1 | 837.44980 | 814.46323 | [M+Na]+    | 3.170 |
| C46H71O10P    | 1 | 837.47090 | 814.47849 | [M+Na]+    | 3.809 |
| C43H81O13P    | 1 | 837.54540 | 836.54148 | [M+H]+     | 4.005 |
| C46H87O8P     | 1 | 837.57480 | 798.61386 | [M+K]+     | 2.637 |
| C48H85O9P     | 1 | 837.60210 | 836.59312 | [M+H]+     | 2.037 |
| C46H91N2O6P   | 1 | 837.62410 | 798.66148 | [M+K]+     | 0.628 |
| C46H74NO8P    | 1 | 838.47550 | 799.51521 | [M+K]+     | 3.409 |
| C46H76NO8P    | 1 | 838.48300 | 801.53086 | [M-2H+K]-  | 4.224 |
| C43H80NO10P   | 1 | 838.50020 | 801.55199 | [M-2H+K]-  | 0.463 |
| C46H80NO10P   | 1 | 838.56330 | 837.55199 | [M+H]+     | 4.820 |
| C47H75N5O8    | 1 | 838.56710 | 837.56157 | [M+H]+     | 2.069 |
| C45H86NO9P    | 1 | 838.59420 | 815.60402 | [M+Na]+    | 1.140 |
| C46H90NO7P    | 1 | 838.60450 | 799.64549 | [M+K]+     | 4.940 |
| C46H90NO8P    | 1 | 838.63190 | 815.64041 | [M+Na]+    | 2.708 |
| C48H88NO8P    | 1 | 838.63190 | 837.62476 | [M+H]+     | 0.153 |

|             |   |           |           |            |       |
|-------------|---|-----------|-----------|------------|-------|
| C47H94NO7P  | 1 | 838.66690 | 815.67679 | [M+Na]+    | 1.056 |
| C50H95NO8   | 2 | 838.71550 | 837.70577 | [M+H]+     | 2.933 |
| C40H64O16   | 1 | 839.38360 | 800.41944 | [M+K]+     | 1.202 |
| C41H69O13P  | 1 | 839.41120 | 800.44758 | [M+K]+     | 0.555 |
| C42H73O13P  | 3 | 839.46490 | 816.47888 | [M+Na]+    | 3.818 |
| C46H73O10P  | 1 | 839.48350 | 816.49414 | [M+Na]+    | 0.167 |
| C46H75O10P  | 1 | 839.48730 | 818.50979 | [M-2H+Na]- | 3.396 |
| C48H73O10P  | 1 | 839.48730 | 840.49414 | [M-H]-     | 0.513 |
| C43H77O12P  | 1 | 839.50780 | 816.51527 | [M+Na]+    | 3.943 |
| C44H81O10P  | 1 | 839.52260 | 800.55674 | [M+K]+     | 3.229 |
| C45H85O10P  | 2 | 839.57380 | 816.58804 | [M+Na]+    | 4.121 |
| C47H83O10P  | 2 | 839.57810 | 838.57239 | [M+H]+     | 1.857 |
| C44H87O12P  | 1 | 839.60380 | 838.59352 | [M+H]+     | 3.586 |
| C51H92O6    | 1 | 839.65570 | 800.68939 | [M+K]+     | 3.761 |
| C52H96O6    | 1 | 839.70690 | 816.72069 | [M+Na]+    | 3.588 |
| C46H76NO8P  | 1 | 840.49500 | 801.53086 | [M+K]+     | 1.180 |
| C45H75O12S  | 4 | 840.50680 | 839.49790 | [M+H]+     | 1.939 |
| C46H78NO9P  | 2 | 840.51670 | 819.54142 | [M-2H+Na]- | 0.734 |
| C43H82NO10P | 2 | 840.51670 | 803.56764 | [M-2H+K]-  | 0.550 |
| C47H82NO7P  | 1 | 840.53040 | 803.58289 | [M-2H+K]-  | 1.300 |
| C46H82NO10P | 1 | 840.57830 | 839.56764 | [M+H]+     | 4.035 |
| C48H84NO7P  | 1 | 840.58790 | 817.59854 | [M+Na]+    | 0.162 |
| C45H88NO9P  | 1 | 840.60720 | 817.61967 | [M+Na]+    | 2.015 |
| C46H92NO7P  | 1 | 840.62100 | 801.66114 | [M+K]+     | 3.917 |
| C46H92NO8P  | 2 | 840.64690 | 817.65606 | [M+Na]+    | 1.928 |
| C48H90NO8P  | 2 | 840.64690 | 839.64041 | [M+H]+     | 0.925 |
| C50H97NO8   | 1 | 840.72710 | 839.72142 | [M+H]+     | 1.891 |
| C41H71O13P  | 1 | 841.42470 | 802.46323 | [M+K]+     | 2.001 |
| C44H73O13P  | 1 | 841.48840 | 840.47888 | [M+H]+     | 2.669 |
| C48H73O10P  | 1 | 841.49840 | 840.49414 | [M+H]+     | 3.576 |
| C46H77O10P  | 1 | 841.50330 | 820.52544 | [M-2H+Na]- | 3.804 |
| C48H75O10P  | 1 | 841.50330 | 842.50979 | [M-H]-     | 0.928 |
| C47H79O8P   | 1 | 841.51110 | 802.55126 | [M+K]+     | 3.932 |
| C47H81O8P   | 2 | 841.51550 | 804.56691 | [M-2H+K]-  | 0.011 |
| C45H87O9P   | 2 | 841.57170 | 802.60877 | [M+K]+     | 0.266 |
| C46H93O9P   | 1 | 841.62670 | 820.65572 | [M-2H+Na]- | 4.377 |
| C48H89O9P   | 1 | 841.62980 | 840.62442 | [M+H]+     | 2.250 |
| C46H91O9P   | 1 | 841.62980 | 818.64007 | [M+Na]+    | 0.600 |
| C57H86O3    | 1 | 841.64690 | 818.65770 | [M+Na]+    | 0.020 |
| C54H96O6    | 1 | 841.72780 | 840.72069 | [M+H]+     | 0.192 |
| C44H70NO10P | 1 | 842.43890 | 803.47374 | [M+K]+     | 2.389 |
| C45H74NO10P | 1 | 842.49450 | 819.50504 | [M+Na]+    | 0.286 |
| C43H82NO10P | 1 | 842.52840 | 803.56764 | [M+K]+     | 2.834 |
| C46H78NO9P  | 1 | 842.52840 | 819.54142 | [M+Na]+    | 2.663 |
| C43H84NO10P | 3 | 842.52990 | 805.58329 | [M-2H+K]-  | 2.360 |
| C46H80NO9P  | 3 | 842.52990 | 821.55707 | [M-2H+Na]- | 2.176 |
| C45H90NO9P  | 2 | 842.62730 | 819.63532 | [M+Na]+    | 3.271 |
| C48H92NO8P  | 2 | 842.66200 | 841.65606 | [M+H]+     | 1.576 |
| C41H73O13P  | 2 | 843.43810 | 804.47888 | [M+K]+     | 4.664 |
| C46H77O9P   | 1 | 843.49230 | 804.53052 | [M+K]+     | 1.629 |
| C44H75O13P  | 1 | 843.50380 | 842.49453 | [M+H]+     | 2.366 |
| C48H75O10P  | 1 | 843.51420 | 842.50979 | [M+H]+     | 3.389 |
| C46H77O10P  | 1 | 843.51420 | 820.52544 | [M+Na]+    | 0.545 |

|                |   |           |           |            |       |
|----------------|---|-----------|-----------|------------|-------|
| C47H81O8P      | 2 | 843.52680 | 804.56691 | [M+K]+     | 3.864 |
| C47H83O8P      | 3 | 843.52820 | 806.58256 | [M-2H+K]-  | 3.508 |
| C43H81O12P     | 1 | 843.53270 | 820.54657 | [M+Na]+    | 3.663 |
| C43H83O12P     | 2 | 843.53360 | 822.56222 | [M-2H+Na]- | 3.887 |
| C45H81O12P     | 2 | 843.53630 | 844.54657 | [M-H]-     | 3.555 |
| C44H85O10P     | 1 | 843.55200 | 804.58804 | [M+K]+     | 0.961 |
| C44H87O10P     | 1 | 843.55640 | 806.60369 | [M-2H+K]-  | 4.873 |
| C48H91O9P      | 2 | 843.64590 | 842.64007 | [M+H]+     | 1.712 |
| C46H93O9P      | 1 | 843.64590 | 820.65572 | [M+Na]+    | 1.132 |
| C51H96O6       | 1 | 843.68030 | 804.72069 | [M+K]+     | 4.198 |
| C45H76NO10P    | 1 | 844.50710 | 821.52069 | [M+Na]+    | 3.326 |
| C42H79NO13     | 1 | 844.51600 | 805.55515 | [M+K]+     | 2.718 |
| C46H80NO8P     | 1 | 844.52510 | 805.56216 | [M+K]+     | 0.246 |
| C46H82NO8P     | 1 | 844.52930 | 807.57781 | [M-2H+K]-  | 3.424 |
| C43H84NO10P    | 1 | 844.54410 | 805.58329 | [M+K]+     | 2.768 |
| C46H80NO9P     | 1 | 844.54410 | 821.55707 | [M+Na]+    | 2.598 |
| C46H82NO9P     | 1 | 844.54430 | 823.57272 | [M-2H+Na]- | 3.650 |
| C47H84NO8P     | 1 | 844.58610 | 821.59346 | [M+Na]+    | 4.051 |
| C44H88NO9P     | 1 | 844.58610 | 805.61967 | [M+K]+     | 3.880 |
| C49H82NO8P     | 1 | 844.58610 | 843.57781 | [M+H]+     | 1.210 |
| C48H88NO6P     | 1 | 844.59530 | 805.63493 | [M+K]+     | 3.289 |
| C46H86NO10P    | 1 | 844.60880 | 843.59894 | [M+H]+     | 3.069 |
| C48H88NO7P     | 1 | 844.62230 | 821.62984 | [M+Na]+    | 3.831 |
| C48H94NO8P     | 2 | 844.68090 | 843.67171 | [M+H]+     | 2.275 |
| C42H62O16      | 2 | 845.39080 | 822.40379 | [M+Na]+    | 2.617 |
| C46H79O9P      | 1 | 845.51000 | 806.54617 | [M+K]+     | 0.800 |
| C44H77O13P     | 1 | 845.51950 | 844.51018 | [M+H]+     | 2.420 |
| C46H79O10P     | 2 | 845.52700 | 822.54109 | [M+Na]+    | 3.915 |
| C48H77O10P     | 2 | 845.53670 | 844.52544 | [M+H]+     | 4.720 |
| C43H83O12P     | 1 | 845.54800 | 822.56222 | [M+Na]+    | 4.068 |
| C47H83O8P      | 2 | 845.54800 | 806.58256 | [M+K]+     | 2.709 |
| C48H93O9P      | 2 | 845.66030 | 844.65572 | [M+H]+     | 3.186 |
| C51H98O6       | 1 | 845.70060 | 806.73634 | [M+K]+     | 1.310 |
| C49H101N2O6P   | 1 | 845.74910 | 844.73973 | [M+H]+     | 2.487 |
| C23H38N7O17P3S | 1 | 846.07070 | 809.12578 | [M-2H+K]-  | 4.352 |
| C44H74NO10P    | 1 | 846.47030 | 807.50504 | [M+K]+     | 2.495 |
| C42H81NO12S    | 1 | 846.53340 | 823.54795 | [M+Na]+    | 4.458 |
| C46H82NO9P     | 1 | 846.55880 | 823.57272 | [M+Na]+    | 3.714 |
| C47H86NO7P     | 1 | 846.57430 | 807.61419 | [M+K]+     | 3.594 |
| C47H86NO8P     | 1 | 846.60230 | 823.60911 | [M+Na]+    | 4.691 |
| C49H84NO8P     | 1 | 846.60230 | 845.59346 | [M+H]+     | 1.857 |
| C46H88NO10P    | 1 | 846.61770 | 845.61459 | [M+H]+     | 4.911 |
| C48H90NO7P     | 1 | 846.63810 | 823.64549 | [M+Na]+    | 3.999 |
| C50H88NO7P     | 1 | 846.63810 | 845.62984 | [M+H]+     | 1.166 |
| C47H92NO9P     | 1 | 846.65440 | 845.65097 | [M+H]+     | 4.539 |
| C48H96NO8P     | 1 | 846.69730 | 845.68736 | [M+H]+     | 3.156 |
| C41H77O13P     | 1 | 847.47670 | 808.51018 | [M+K]+     | 3.972 |
| C45H77O10P     | 1 | 847.49010 | 808.52544 | [M+K]+     | 1.783 |
| C42H81O13P     | 1 | 847.53480 | 824.54148 | [M+Na]+    | 4.832 |
| C44H79O13P     | 1 | 847.53480 | 846.52583 | [M+H]+     | 2.001 |
| C43H85O12P     | 1 | 847.56900 | 824.57787 | [M+Na]+    | 2.254 |
| C45H83O12P     | 2 | 847.56900 | 846.56222 | [M+H]+     | 0.577 |
| C47H91O10P     | 1 | 847.64070 | 846.63499 | [M+H]+     | 1.839 |

|                |   |           |           |                        |       |
|----------------|---|-----------|-----------|------------------------|-------|
| C55H91O4P      | 3 | 847.67040 | 846.66550 | [M+H] <sup>+</sup>     | 2.795 |
| C54H102O6      | 1 | 847.77520 | 846.76764 | [M+H] <sup>+</sup>     | 0.340 |
| C48H76NO8P     | 1 | 848.52280 | 825.53086 | [M+Na] <sup>+</sup>    | 3.207 |
| C45H80NO10P    | 2 | 848.54530 | 825.55199 | [M+Na] <sup>+</sup>    | 4.821 |
| C47H78NO10P    | 2 | 848.54530 | 847.53634 | [M+H] <sup>+</sup>     | 1.994 |
| C46H84NO8P     | 2 | 848.55470 | 809.59346 | [M+K] <sup>+</sup>     | 2.249 |
| C48H82NO9P     | 1 | 848.57800 | 847.57272 | [M+H] <sup>+</sup>     | 2.349 |
| C46H84NO9P     | 1 | 848.57800 | 825.58837 | [M+Na] <sup>+</sup>    | 0.478 |
| C49H86NO8P     | 1 | 848.61730 | 847.60911 | [M+H] <sup>+</sup>     | 1.086 |
| C48H92NO6P     | 2 | 848.63150 | 809.66623 | [M+K] <sup>+</sup>     | 2.501 |
| C46H90NO10P    | 1 | 848.63360 | 847.63024 | [M+H] <sup>+</sup>     | 4.605 |
| C48H92NO7P     | 2 | 848.64640 | 825.66114 | [M+Na] <sup>+</sup>    | 4.671 |
| C50H90NO7P     | 1 | 848.65420 | 847.64549 | [M+H] <sup>+</sup>     | 1.693 |
| C41H79O13P     | 3 | 849.48910 | 810.52583 | [M+K] <sup>+</sup>     | 0.137 |
| C45H81O10P     | 1 | 849.50580 | 812.55674 | [M-2H+K] <sup>-</sup>  | 0.543 |
| C46H83O9P      | 1 | 849.54380 | 810.57747 | [M+K] <sup>+</sup>     | 3.738 |
| C44H81O13P     | 1 | 849.54770 | 848.54148 | [M+H] <sup>+</sup>     | 1.241 |
| C45H85O12P     | 1 | 849.58390 | 848.57787 | [M+H] <sup>+</sup>     | 1.458 |
| C58H88O4       | 1 | 849.67400 | 848.66826 | [M+H] <sup>+</sup>     | 1.803 |
| C48H95N2O6P    | 1 | 849.68540 | 826.69278 | [M+Na] <sup>+</sup>    | 4.004 |
| C25H40N7O18P3S | 1 | 850.12590 | 851.13635 | [M-H] <sup>-</sup>     | 3.737 |
| C47H74NO8P     | 1 | 850.47470 | 811.51521 | [M+K] <sup>+</sup>     | 4.301 |
| C44H80NO10P    | 1 | 850.49790 | 813.55199 | [M-2H+K] <sup>-</sup>  | 3.160 |
| C45H82NO10P    | 1 | 850.55430 | 827.56764 | [M+Na] <sup>+</sup>    | 3.009 |
| C46H86NO9P     | 1 | 850.59580 | 827.60402 | [M+Na] <sup>+</sup>    | 3.005 |
| C48H84NO9P     | 2 | 850.59580 | 849.58837 | [M+H] <sup>+</sup>     | 0.185 |
| C42H68O15      | 2 | 851.41680 | 812.45583 | [M+K] <sup>+</sup>     | 2.556 |
| C45H71O13P     | 2 | 851.46760 | 850.46323 | [M+H] <sup>+</sup>     | 3.411 |
| C43H73O13P     | 2 | 851.46760 | 828.47888 | [M+Na] <sup>+</sup>    | 0.593 |
| C40H78O13P2    | 3 | 851.47760 | 828.49177 | [M+Na] <sup>+</sup>    | 3.984 |
| C45H81O10P     | 1 | 851.51790 | 812.55674 | [M+K] <sup>+</sup>     | 2.336 |
| C46H85O9P      | 1 | 851.55300 | 812.59312 | [M+K] <sup>+</sup>     | 3.845 |
| C46H85O10P     | 1 | 851.57420 | 828.58804 | [M+Na] <sup>+</sup>    | 3.593 |
| C45H87O12P     | 1 | 851.60330 | 850.59352 | [M+H] <sup>+</sup>     | 2.949 |
| C47H93N2O6P    | 1 | 851.64240 | 812.67713 | [M+K] <sup>+</sup>     | 2.493 |
| C52H92O6       | 1 | 851.65440 | 812.68939 | [M+K] <sup>+</sup>     | 2.182 |
| C53H96O6       | 1 | 851.71350 | 828.72069 | [M+Na] <sup>+</sup>    | 4.212 |
| C55H94O6       | 1 | 851.71350 | 850.70504 | [M+H] <sup>+</sup>     | 1.395 |
| C25H40N7O18P3S | 2 | 852.14240 | 851.13635 | [M+H] <sup>+</sup>     | 1.428 |
| C47H76NO8P     | 1 | 852.49790 | 813.53086 | [M+K] <sup>+</sup>     | 4.565 |
| C44H80NO10P    | 1 | 852.51370 | 813.55199 | [M+K] <sup>+</sup>     | 1.687 |
| C48H80NO7P     | 2 | 852.53210 | 813.56724 | [M+K] <sup>+</sup>     | 2.002 |
| C45H86NO9P     | 3 | 852.55020 | 815.60402 | [M-2H+K] <sup>-</sup>  | 2.842 |
| C48H82NO8P     | 3 | 852.55020 | 831.57781 | [M-2H+Na] <sup>-</sup> | 2.660 |
| C50H78NO8P     | 2 | 852.55190 | 851.54651 | [M+H] <sup>+</sup>     | 2.203 |
| C48H80NO8P     | 2 | 852.55190 | 829.56216 | [M+Na] <sup>+</sup>    | 0.611 |
| C50H80NO8P     | 2 | 852.55290 | 853.56216 | [M-H] <sup>-</sup>     | 2.332 |
| C44H85NO12S    | 1 | 852.58260 | 851.57925 | [M+H] <sup>+</sup>     | 4.601 |
| C48H86NO9P     | 2 | 852.60890 | 851.60402 | [M+H] <sup>+</sup>     | 2.807 |
| C46H88NO9P     | 2 | 852.60890 | 829.61967 | [M+Na] <sup>+</sup>    | 0.007 |
| C47H92NO7P     | 1 | 852.62200 | 813.66114 | [M+K] <sup>+</sup>     | 2.689 |
| C48H96NO6P     | 1 | 852.65990 | 813.69753 | [M+K] <sup>+</sup>     | 0.912 |
| C48H95NO8      | 1 | 852.67130 | 813.70577 | [M+K] <sup>+</sup>     | 2.791 |

|             |   |           |           |            |       |
|-------------|---|-----------|-----------|------------|-------|
| C46H71O10P  | 3 | 853.44560 | 814.47849 | [M+K]+     | 4.641 |
| C43H75O12P  | 1 | 853.46610 | 814.49962 | [M+K]+     | 3.903 |
| C43H75O13P  | 2 | 853.48710 | 830.49453 | [M+Na]+    | 3.919 |
| C45H73O13P  | 2 | 853.48710 | 852.47888 | [M+H]+     | 1.108 |
| C48H85O10P  | 1 | 853.59180 | 852.58804 | [M+H]+     | 4.111 |
| C46H87O10P  | 1 | 853.59180 | 830.60369 | [M+Na]+    | 1.300 |
| C47H91O8P   | 1 | 853.61200 | 814.64516 | [M+K]+     | 4.324 |
| C52H94O6    | 1 | 853.67060 | 814.70504 | [M+K]+     | 2.821 |
| C55H96O6    | 1 | 853.72610 | 852.72069 | [M+H]+     | 2.181 |
| C53H98O6    | 1 | 853.72610 | 830.73634 | [M+Na]+    | 0.629 |
| C46H74NO10P | 2 | 854.49550 | 831.50504 | [M+Na]+    | 1.452 |
| C48H72NO10P | 2 | 854.49550 | 853.48939 | [M+H]+     | 1.355 |
| C47H78NO8P  | 1 | 854.50960 | 815.54651 | [M+K]+     | 0.068 |
| C44H84NO10P | 1 | 854.53050 | 817.58329 | [M-2H+K]-  | 1.624 |
| C44H82NO10P | 2 | 854.53320 | 815.56764 | [M+K]+     | 2.823 |
| C48H82NO8P  | 1 | 854.56990 | 831.57781 | [M+Na]+    | 3.360 |
| C45H86NO9P  | 1 | 854.56990 | 815.60402 | [M+K]+     | 3.191 |
| C50H80NO8P  | 2 | 854.56990 | 853.56216 | [M+H]+     | 0.552 |
| C46H90NO8P  | 1 | 854.60470 | 815.64041 | [M+K]+     | 1.336 |
| C48H88NO9P  | 1 | 854.63060 | 853.61967 | [M+H]+     | 4.279 |
| C49H92NO8P  | 1 | 854.66310 | 853.65606 | [M+H]+     | 0.267 |
| C50H96NO7P  | 1 | 854.70210 | 853.69244 | [M+H]+     | 2.793 |
| C42H73O13P  | 1 | 855.44550 | 816.47888 | [M+K]+     | 4.052 |
| C46H73O10P  | 1 | 855.45670 | 816.49414 | [M+K]+     | 0.689 |
| C43H77O12P  | 1 | 855.47590 | 816.51527 | [M+K]+     | 2.945 |
| C43H79O13P  | 1 | 855.50280 | 834.52583 | [M-2H+Na]- | 2.695 |
| C45H77O13P  | 1 | 855.50280 | 856.51018 | [M-H]-     | 0.133 |
| C47H79O10P  | 2 | 855.51730 | 834.54109 | [M-2H+Na]- | 1.813 |
| C44H82O13   | 1 | 855.52110 | 818.57555 | [M-2H+K]-  | 3.562 |
| C46H89O9P   | 1 | 855.58780 | 816.62442 | [M+K]+     | 0.264 |
| C52H96O6    | 1 | 855.68420 | 816.72069 | [M+K]+     | 0.418 |
| C45H72NO10P | 2 | 856.44870 | 817.48939 | [M+K]+     | 4.481 |
| C46H76NO10P | 1 | 856.51330 | 833.52069 | [M+Na]+    | 3.959 |
| C48H74NO10P | 2 | 856.51480 | 855.50504 | [M+H]+     | 2.909 |
| C47H80NO8P  | 2 | 856.52370 | 817.56216 | [M+K]+     | 1.877 |
| C44H86NO10P | 1 | 856.54720 | 819.59894 | [M-2H+K]-  | 0.395 |
| C44H84NO10P | 1 | 856.55050 | 817.58329 | [M+K]+     | 4.742 |
| C48H84NO7P  | 1 | 856.55760 | 817.59854 | [M+K]+     | 4.778 |
| C44H83NO13  | 2 | 856.57820 | 833.58645 | [M+Na]+    | 2.958 |
| C45H88NO10P | 1 | 856.60530 | 833.61459 | [M+Na]+    | 1.741 |
| C47H86NO10P | 1 | 856.60530 | 855.59894 | [M+H]+     | 1.060 |
| C46H92NO8P  | 1 | 856.62000 | 817.65606 | [M+K]+     | 0.925 |
| C49H94NO8P  | 2 | 856.68160 | 855.67171 | [M+H]+     | 3.061 |
| C50H98NO7P  | 1 | 856.71780 | 855.70809 | [M+H]+     | 2.845 |
| C45H77O13P  | 1 | 857.52070 | 856.51018 | [M+H]+     | 3.785 |
| C44H82O13   | 2 | 857.53950 | 818.57555 | [M+K]+     | 0.936 |
| C44H85O12P  | 1 | 857.55040 | 836.57787 | [M-2H+Na]- | 2.483 |
| C48H83O9P   | 1 | 857.56780 | 834.57747 | [M+Na]+    | 1.289 |
| C46H91O9P   | 1 | 857.60120 | 818.64007 | [M+K]+     | 2.360 |
| C46H91O10P  | 2 | 857.62180 | 834.63499 | [M+Na]+    | 2.810 |
| C48H89O10P  | 1 | 857.62410 | 856.61934 | [M+H]+     | 2.926 |
| C57H86O4    | 1 | 857.64230 | 834.65261 | [M+Na]+    | 0.546 |
| C55H100O6   | 1 | 857.75730 | 856.75199 | [M+H]+     | 2.287 |

|             |   |           |           |            |       |
|-------------|---|-----------|-----------|------------|-------|
| C53H102O6   | 1 | 857.75730 | 834.76764 | [M+Na]+    | 0.509 |
| C48H76NO10P | 1 | 858.53160 | 857.52069 | [M+H]+     | 4.242 |
| C44H86NO10P | 1 | 858.55820 | 819.59894 | [M+K]+     | 4.529 |
| C44H85NO13  | 1 | 858.58920 | 835.60210 | [M+Na]+    | 2.465 |
| C47H88NO10P | 1 | 858.62540 | 857.61459 | [M+H]+     | 4.125 |
| C48H92NO9P  | 1 | 858.65640 | 857.65097 | [M+H]+     | 2.146 |
| C49H96NO8P  | 3 | 858.69850 | 857.68736 | [M+H]+     | 4.509 |
| C50H100NO7P | 1 | 858.73340 | 857.72374 | [M+H]+     | 2.780 |
| C42H77O13P  | 1 | 859.46930 | 820.51018 | [M+K]+     | 4.694 |
| C46H77O10P  | 1 | 859.49140 | 820.52544 | [M+K]+     | 3.271 |
| C43H81O13P  | 1 | 859.52750 | 836.54148 | [M+Na]+    | 3.729 |
| C45H79O13P  | 1 | 859.53210 | 858.52583 | [M+H]+     | 1.168 |
| C47H81O10P  | 3 | 859.54180 | 836.55674 | [M+Na]+    | 4.840 |
| C47H83O10P  | 1 | 859.54970 | 838.57239 | [M-2H+Na]- | 3.084 |
| C44H85O12P  | 2 | 859.56560 | 836.57787 | [M+Na]+    | 1.733 |
| C45H89O10P  | 1 | 859.57900 | 820.61934 | [M+K]+     | 4.059 |
| C50H84O7P2  | 1 | 859.57900 | 858.56923 | [M+H]+     | 2.906 |
| C46H93O9P   | 1 | 859.61630 | 820.65572 | [M+K]+     | 2.994 |
| C55H102O6   | 2 | 859.77220 | 858.76764 | [M+H]+     | 3.154 |
| C47H75N5O8  | 2 | 860.54680 | 837.56157 | [M+Na]+    | 4.632 |
| C48H78NO10P | 3 | 860.54680 | 859.53634 | [M+H]+     | 3.709 |
| C48H88NO7P  | 1 | 860.59250 | 821.62984 | [M+K]+     | 0.573 |
| C48H94NO9P  | 2 | 860.66970 | 859.66662 | [M+H]+     | 4.872 |
| C49H98NO8P  | 1 | 860.70860 | 859.70301 | [M+H]+     | 1.950 |
| C42H79O13P  | 1 | 861.49030 | 822.52583 | [M+K]+     | 1.528 |
| C46H79O10P  | 1 | 861.50690 | 822.54109 | [M+K]+     | 3.089 |
| C46H81O10P  | 1 | 861.50760 | 824.55674 | [M-2H+K]-  | 2.624 |
| C45H81O13P  | 1 | 861.54640 | 860.54148 | [M+H]+     | 2.732 |
| C43H83O13P  | 1 | 861.54640 | 838.55713 | [M+Na]+    | 0.052 |
| C46H85O12P  | 1 | 861.58260 | 860.57787 | [M+H]+     | 2.947 |
| C44H87O12P  | 1 | 861.58260 | 838.59352 | [M+Na]+    | 0.162 |
| C48H87O9P   | 1 | 861.59580 | 838.60877 | [M+Na]+    | 2.548 |
| C46H95O9P   | 1 | 861.63620 | 822.67137 | [M+K]+     | 1.945 |
| C55H104O6   | 1 | 861.78760 | 860.78329 | [M+H]+     | 3.437 |
| C42H81NO12S | 1 | 862.51010 | 823.54795 | [M+K]+     | 1.163 |
| C46H82NO9P  | 1 | 862.53330 | 823.57272 | [M+K]+     | 2.983 |
| C49H78NO8P  | 1 | 862.53330 | 839.54651 | [M+Na]+    | 2.816 |
| C46H82NO10P | 1 | 862.55560 | 839.56764 | [M+Na]+    | 1.460 |
| C48H80NO10P | 2 | 862.55840 | 861.55199 | [M+H]+     | 0.995 |
| C48H90NO7P  | 3 | 862.61120 | 823.64549 | [M+K]+     | 2.964 |
| C48H90NO8P  | 1 | 862.62690 | 839.64041 | [M+Na]+    | 3.164 |
| C46H87NO13  | 2 | 862.62690 | 861.61775 | [M+H]+     | 2.185 |
| C47H92NO10P | 1 | 862.65480 | 861.64589 | [M+H]+     | 1.903 |
| C48H96NO9P  | 1 | 862.68840 | 861.68227 | [M+H]+     | 1.325 |
| C44H73O13P  | 3 | 863.46720 | 840.47888 | [M+Na]+    | 1.048 |
| C48H73O10P  | 1 | 863.48720 | 840.49414 | [M+Na]+    | 4.447 |
| C46H83O10P  | 1 | 863.52350 | 826.57239 | [M-2H+K]-  | 2.908 |
| C43H85O12P  | 1 | 863.54430 | 824.57787 | [M+K]+     | 3.799 |
| C47H85O10P  | 2 | 863.57820 | 840.58804 | [M+Na]+    | 1.088 |
| C48H89O9P   | 2 | 863.61160 | 840.62442 | [M+Na]+    | 2.368 |
| C59H90O4    | 3 | 863.69180 | 862.68391 | [M+H]+     | 0.716 |
| C49H97N2O6P | 1 | 863.69410 | 840.70843 | [M+Na]+    | 4.108 |
| C55H106O6   | 1 | 863.80560 | 862.79894 | [M+H]+     | 0.708 |

|                |   |           |           |                        |       |
|----------------|---|-----------|-----------|------------------------|-------|
| C27H44N7O17P3S | 1 | 864.17840 | 863.17273 | [M+H] <sup>+</sup>     | 1.854 |
| C45H82NO10P    | 4 | 864.51230 | 827.56764 | [M-2H+K] <sup>-</sup>  | 4.555 |
| C46H90NO11P    | 3 | 864.63290 | 863.62515 | [M+H] <sup>+</sup>     | 0.552 |
| C44H75O13P     | 2 | 865.48520 | 842.49453 | [M+Na] <sup>+</sup>    | 1.670 |
| C50H75O10P     | 1 | 865.50450 | 866.50979 | [M-H] <sup>-</sup>     | 2.289 |
| C45H79O12P     | 2 | 865.51640 | 842.53092 | [M+Na] <sup>+</sup>    | 4.321 |
| C45H81O12P     | 2 | 865.52320 | 844.54657 | [M-2H+Na] <sup>-</sup> | 2.277 |
| C47H79O12P     | 2 | 865.52320 | 866.53092 | [M-H] <sup>-</sup>     | 0.519 |
| C46H89O12P     | 1 | 865.61440 | 864.60917 | [M+H] <sup>+</sup>     | 2.356 |
| C48H91O9P      | 2 | 865.62630 | 842.64007 | [M+Na] <sup>+</sup>    | 3.460 |
| C48H95N2O6P    | 1 | 865.65710 | 826.69278 | [M+K] <sup>+</sup>     | 1.355 |
| C49H99N2O6P    | 1 | 865.71090 | 842.72408 | [M+Na] <sup>+</sup>    | 2.770 |
| C48H78NO8P     | 2 | 866.50750 | 827.54651 | [M+K] <sup>+</sup>     | 2.490 |
| C45H84NO10P    | 1 | 866.52990 | 829.58329 | [M-2H+K] <sup>-</sup>  | 2.294 |
| C45H82NO10P    | 1 | 866.53500 | 827.56764 | [M+K] <sup>+</sup>     | 4.861 |
| C47H90NO8P     | 1 | 866.60140 | 827.64041 | [M+K] <sup>+</sup>     | 2.490 |
| C48H94NO7P     | 1 | 866.63650 | 827.67679 | [M+K] <sup>+</sup>     | 3.973 |
| C43H73O13P     | 2 | 867.44070 | 828.47888 | [M+K] <sup>+</sup>     | 1.538 |
| C40H78O13P2    | 1 | 867.45820 | 828.49177 | [M+K] <sup>+</sup>     | 3.780 |
| C48H79O10P     | 1 | 867.51930 | 846.54109 | [M-2H+Na] <sup>-</sup> | 4.093 |
| C45H87O13P     | 1 | 867.59170 | 866.58843 | [M+H] <sup>+</sup>     | 4.615 |
| C46H91O12P     | 1 | 867.63050 | 866.62482 | [M+H] <sup>+</sup>     | 1.831 |
| C48H97N2O6P    | 1 | 867.67240 | 828.70843 | [M+K] <sup>+</sup>     | 0.949 |
| C46H72NO10P    | 1 | 868.45240 | 829.48939 | [M+K] <sup>+</sup>     | 0.159 |
| C45H86NO10P    | 2 | 868.54650 | 831.59894 | [M-2H+K] <sup>-</sup>  | 1.195 |
| C48H82NO9P     | 2 | 868.54650 | 847.57272 | [M-2H+Na] <sup>-</sup> | 1.017 |
| C46H88NO10P    | 3 | 868.60060 | 845.61459 | [M+Na] <sup>+</sup>    | 3.694 |
| C48H86NO10P    | 2 | 868.60320 | 867.59894 | [M+H] <sup>+</sup>     | 3.463 |
| C50H94NO8P     | 1 | 868.67510 | 867.67171 | [M+H] <sup>+</sup>     | 4.464 |
| C48H96NO8P     | 1 | 868.67510 | 845.68736 | [M+Na] <sup>+</sup>    | 1.703 |
| C49H100NO7P    | 1 | 868.71170 | 845.72374 | [M+Na] <sup>+</sup>    | 1.455 |
| C43H75O13P     | 1 | 869.45810 | 830.49453 | [M+K] <sup>+</sup>     | 0.478 |
| C46H77O13P     | 1 | 869.51600 | 868.51018 | [M+H] <sup>+</sup>     | 1.672 |
| C44H81O13P     | 1 | 869.51770 | 848.54148 | [M-2H+Na] <sup>-</sup> | 1.790 |
| C46H79O13P     | 1 | 869.51770 | 870.52583 | [M-H] <sup>-</sup>     | 0.994 |
| C48H79O10P     | 1 | 869.53190 | 846.54109 | [M+Na] <sup>+</sup>    | 1.829 |
| C45H85O12P     | 1 | 869.54860 | 848.57787 | [M-2H+Na] <sup>-</sup> | 4.518 |
| C47H81O12P     | 1 | 869.55060 | 868.54657 | [M+H] <sup>+</sup>     | 3.725 |
| C47H91O10P     | 1 | 869.62740 | 846.63499 | [M+Na] <sup>+</sup>    | 3.668 |
| C49H89O10P     | 1 | 869.62740 | 868.61934 | [M+H] <sup>+</sup>     | 0.910 |
| C53H98O6       | 2 | 869.70350 | 830.73634 | [M+K] <sup>+</sup>     | 4.608 |
| C56H100O6      | 1 | 869.76210 | 868.75199 | [M+H] <sup>+</sup>     | 3.263 |
| C46H74NO10P    | 2 | 870.46530 | 831.50504 | [M+K] <sup>+</sup>     | 3.318 |
| C47H78NO10P    | 1 | 870.52830 | 847.53634 | [M+Na] <sup>+</sup>    | 3.149 |
| C48H84NO8P     | 1 | 870.54040 | 833.59346 | [M-2H+K] <sup>-</sup>  | 1.905 |
| C48H82NO9P     | 1 | 870.56420 | 847.57272 | [M+Na] <sup>+</sup>    | 2.591 |
| C48H84NO9P     | 2 | 870.56440 | 849.58837 | [M-2H+Na] <sup>-</sup> | 1.570 |
| C45H88NO10P    | 2 | 870.56440 | 833.61459 | [M-2H+K] <sup>-</sup>  | 1.392 |
| C46H90NO10P    | 1 | 870.61550 | 847.63024 | [M+Na] <sup>+</sup>    | 4.547 |
| C47H94NO8P     | 1 | 870.63260 | 831.67171 | [M+K] <sup>+</sup>     | 2.594 |
| C50H90NO7P     | 1 | 870.63260 | 847.64549 | [M+Na] <sup>+</sup>    | 2.428 |
| C47H94NO9P     | 1 | 870.65970 | 847.66662 | [M+Na] <sup>+</sup>    | 4.429 |
| C33H53Na3O16S3 | 2 | 871.22950 | 870.21889 | [M+H] <sup>+</sup>     | 3.833 |

|                |   |           |           |                        |       |
|----------------|---|-----------|-----------|------------------------|-------|
| C46H79O13P     | 1 | 871.53680 | 870.52583 | [M+H] <sup>+</sup>     | 4.241 |
| C50H79O10P     | 1 | 871.55060 | 870.54109 | [M+H] <sup>+</sup>     | 2.571 |
| C45H85O12P     | 2 | 871.56440 | 848.57787 | [M+Na] <sup>+</sup>    | 3.086 |
| C47H83O12P     | 2 | 871.56700 | 870.56222 | [M+H] <sup>+</sup>     | 2.856 |
| C47H85O12P     | 1 | 871.56760 | 872.57787 | [M-H] <sup>-</sup>     | 3.441 |
| C45H87O12P     | 1 | 871.56760 | 850.59352 | [M-2H+Na] <sup>-</sup> | 0.664 |
| C46H89O10P     | 1 | 871.58230 | 832.61934 | [M+K] <sup>+</sup>     | 0.217 |
| C58H88O3       | 1 | 871.63350 | 832.67335 | [M+K] <sup>+</sup>     | 3.438 |
| C55H92O6       | 1 | 871.68260 | 848.68939 | [M+Na] <sup>+</sup>    | 4.574 |
| C54H104O6      | 1 | 871.77470 | 848.78329 | [M+Na] <sup>+</sup>    | 2.509 |
| C56H102O6      | 1 | 871.77470 | 870.76764 | [M+H] <sup>+</sup>     | 0.243 |
| C47H80NO10P    | 1 | 872.54140 | 849.55199 | [M+Na] <sup>+</sup>    | 0.219 |
| C48H84NO8P     | 1 | 872.55410 | 833.59346 | [M+K] <sup>+</sup>     | 2.874 |
| C48H84NO9P     | 1 | 872.57620 | 849.58837 | [M+Na] <sup>+</sup>    | 1.598 |
| C48H90NO10P    | 1 | 872.63940 | 871.63024 | [M+H] <sup>+</sup>     | 2.168 |
| C42H64O19      | 1 | 873.41060 | 872.40419 | [M+H] <sup>+</sup>     | 0.980 |
| C45H71O13P     | 2 | 873.45440 | 850.46323 | [M+Na] <sup>+</sup>    | 2.227 |
| C47H79O10P     | 4 | 873.50370 | 834.54109 | [M+K] <sup>+</sup>     | 0.617 |
| C44H85O12P     | 1 | 873.52480 | 836.57787 | [M-2H+K] <sup>-</sup>  | 1.911 |
| C44H83O12P     | 1 | 873.52610 | 834.56222 | [M+K] <sup>+</sup>     | 0.837 |
| C44H85O13P     | 1 | 873.55070 | 852.57278 | [M-2H+Na] <sup>-</sup> | 3.727 |
| C46H83O13P     | 1 | 873.55070 | 874.55713 | [M-H] <sup>-</sup>     | 0.957 |
| C46H81O13P     | 1 | 873.55270 | 872.54148 | [M+H] <sup>+</sup>     | 4.517 |
| C57H92O6       | 1 | 873.69880 | 872.68939 | [M+H] <sup>+</sup>     | 2.447 |
| C53H102O6      | 1 | 873.73020 | 834.76764 | [M+K] <sup>+</sup>     | 0.678 |
| C49H74NO8P     | 1 | 874.48140 | 835.51521 | [M+K] <sup>+</sup>     | 3.479 |
| C46H78NO10P    | 1 | 874.50220 | 835.53634 | [M+K] <sup>+</sup>     | 3.101 |
| C44H85NO11S    | 1 | 874.54370 | 835.58434 | [M+K] <sup>+</sup>     | 4.331 |
| C48H92NO10P    | 1 | 874.65200 | 873.64589 | [M+H] <sup>+</sup>     | 1.324 |
| C43H81O13P     | 1 | 875.50720 | 836.54148 | [M+K] <sup>+</sup>     | 2.931 |
| C44H85O12P     | 1 | 875.54410 | 836.57787 | [M+K] <sup>+</sup>     | 3.519 |
| C48H85O9P      | 1 | 875.55750 | 836.59312 | [M+K] <sup>+</sup>     | 1.400 |
| C44H85O13P     | 2 | 875.56510 | 852.57278 | [M+Na] <sup>+</sup>    | 3.535 |
| C46H83O13P     | 2 | 875.56510 | 874.55713 | [M+H] <sup>+</sup>     | 0.795 |
| C50H83O10P     | 1 | 875.57800 | 874.57239 | [M+H] <sup>+</sup>     | 1.895 |
| C48H85O10P     | 1 | 875.57800 | 852.58804 | [M+Na] <sup>+</sup>    | 0.845 |
| C54H92O6       | 1 | 875.65020 | 836.68939 | [M+K] <sup>+</sup>     | 2.675 |
| C49H95O10P     | 1 | 875.67360 | 874.66629 | [M+H] <sup>+</sup>     | 0.047 |
| C56H106O6      | 1 | 875.80850 | 874.79894 | [M+H] <sup>+</sup>     | 2.612 |
| C24H38N7O19P3S | 1 | 876.10610 | 853.11561 | [M+Na] <sup>+</sup>    | 1.446 |
| C48H72NO10P    | 1 | 876.47800 | 853.48939 | [M+Na] <sup>+</sup>    | 0.695 |
| C46H80NO10P    | 2 | 876.51200 | 837.55199 | [M+K] <sup>+</sup>     | 3.580 |
| C47H75N5O8     | 1 | 876.52620 | 837.56157 | [M+K] <sup>+</sup>     | 1.694 |
| C45H77O12P     | 1 | 877.46610 | 840.51527 | [M-2H+K] <sup>-</sup>  | 2.543 |
| C45H75O13P     | 2 | 877.48470 | 854.49453 | [M+Na] <sup>+</sup>    | 1.077 |
| C47H73O13P     | 3 | 877.49030 | 876.47888 | [M+H] <sup>+</sup>     | 4.725 |
| C43H83O13P     | 2 | 877.52260 | 838.55713 | [M+K] <sup>+</sup>     | 2.639 |
| C48H87O9P      | 1 | 877.57040 | 838.60877 | [M+K] <sup>+</sup>     | 1.737 |
| C46H85O13P     | 1 | 877.58170 | 876.57278 | [M+H] <sup>+</sup>     | 1.876 |
| C50H85O10P     | 1 | 877.59960 | 876.58804 | [M+H] <sup>+</sup>     | 4.889 |
| C47H89O12P     | 1 | 877.61810 | 876.60917 | [M+H] <sup>+</sup>     | 1.893 |
| C54H94O6       | 1 | 877.66450 | 838.70504 | [M+K] <sup>+</sup>     | 4.207 |
| C49H97O10P     | 1 | 877.68570 | 876.68194 | [M+H] <sup>+</sup>     | 3.998 |



|                |   |           |           |                        |       |
|----------------|---|-----------|-----------|------------------------|-------|
| C57H96O6       | 1 | 877.72600 | 876.72069 | [M+H] <sup>+</sup>     | 2.235 |
| C55H98O6       | 1 | 877.72600 | 854.73634 | [M+Na] <sup>+</sup>    | 0.498 |
| C56H108O6      | 1 | 877.82220 | 876.81459 | [M+H] <sup>+</sup>     | 0.385 |
| C48H76NO10P    | 1 | 878.49730 | 857.52069 | [M-2H+Na] <sup>-</sup> | 2.222 |
| C50H74NO10P    | 1 | 878.49730 | 879.50504 | [M-H] <sup>-</sup>     | 0.533 |
| C47H86NO10P    | 1 | 878.58990 | 855.59894 | [M+Na] <sup>+</sup>    | 1.982 |
| C49H84NO10P    | 2 | 878.58990 | 877.58329 | [M+H] <sup>+</sup>     | 0.749 |
| C48H73O10P     | 1 | 879.45850 | 840.49414 | [M+K] <sup>+</sup>     | 1.377 |
| C45H77O12P     | 1 | 879.47960 | 840.51527 | [M+K] <sup>+</sup>     | 1.343 |
| C45H77O13P     | 3 | 879.50300 | 856.51018 | [M+Na] <sup>+</sup>    | 4.088 |
| C47H75O13P     | 5 | 879.50300 | 878.49453 | [M+H] <sup>+</sup>     | 1.360 |
| C47H85O10P     | 1 | 879.55440 | 840.58804 | [M+K] <sup>+</sup>     | 3.651 |
| C48H89O9P      | 1 | 879.58640 | 840.62442 | [M+K] <sup>+</sup>     | 1.335 |
| C46H87O13P     | 1 | 879.59670 | 878.58843 | [M+H] <sup>+</sup>     | 1.132 |
| C50H87O10P     | 1 | 879.61350 | 878.60369 | [M+H] <sup>+</sup>     | 2.889 |
| C54H96O6       | 2 | 879.68490 | 840.72069 | [M+K] <sup>+</sup>     | 1.203 |
| C55H100O6      | 1 | 879.73800 | 856.75199 | [M+Na] <sup>+</sup>    | 3.652 |
| C57H98O6       | 1 | 879.74750 | 878.73634 | [M+H] <sup>+</sup>     | 4.419 |
| C27H44N7O18P3S | 1 | 880.17290 | 879.16765 | [M+H] <sup>+</sup>     | 2.292 |
| C48H76NO10P    | 3 | 880.50780 | 857.52069 | [M+Na] <sup>+</sup>    | 2.395 |
| C50H74NO10P    | 1 | 880.50940 | 879.50504 | [M+H] <sup>+</sup>     | 3.303 |
| C49H82NO8P     | 1 | 880.52230 | 843.57781 | [M-2H+K] <sup>-</sup>  | 4.665 |
| C46H84NO10P    | 1 | 880.54280 | 841.58329 | [M+K] <sup>+</sup>     | 4.132 |
| C48H92NO9P     | 1 | 880.63590 | 857.65097 | [M+Na] <sup>+</sup>    | 4.876 |
| C50H99NO8      | 1 | 880.69730 | 841.73707 | [M+K] <sup>+</sup>     | 3.316 |
| C48H75O10P     | 2 | 881.47140 | 842.50979 | [M+K] <sup>+</sup>     | 1.746 |
| C45H81O12P     | 1 | 881.49870 | 844.54657 | [M-2H+K] <sup>-</sup>  | 4.006 |
| C45H79O13P     | 1 | 881.51870 | 858.52583 | [M+Na] <sup>+</sup>    | 4.135 |
| C47H77O13P     | 2 | 881.52140 | 880.51018 | [M+H] <sup>+</sup>     | 4.476 |
| C47H87O10P     | 1 | 881.56980 | 842.60369 | [M+K] <sup>+</sup>     | 3.359 |
| C48H91O10P     | 3 | 881.62060 | 858.63499 | [M+Na] <sup>+</sup>    | 4.095 |
| C50H89O10P     | 1 | 881.62240 | 880.61934 | [M+H] <sup>+</sup>     | 4.774 |
| C47H93O12P     | 1 | 881.64830 | 880.64047 | [M+H] <sup>+</sup>     | 0.636 |
| C54H98O6       | 1 | 881.69640 | 842.73634 | [M+K] <sup>+</sup>     | 3.507 |
| C57H100O6      | 1 | 881.76180 | 880.75199 | [M+H] <sup>+</sup>     | 2.878 |
| C27H46N7O18P3S | 1 | 882.19410 | 881.18330 | [M+H] <sup>+</sup>     | 4.005 |
| C48H78NO10P    | 2 | 882.52620 | 859.53634 | [M+Na] <sup>+</sup>    | 0.726 |
| C49H82NO8P     | 1 | 882.53920 | 843.57781 | [M+K] <sup>+</sup>     | 1.992 |
| C46H86NO10P    | 1 | 882.56550 | 843.59894 | [M+K] <sup>+</sup>     | 3.866 |
| C50H86NO8P     | 2 | 882.59450 | 859.60911 | [M+Na] <sup>+</sup>    | 4.338 |
| C47H90NO10P    | 2 | 882.61550 | 859.63024 | [M+Na] <sup>+</sup>    | 4.486 |
| C49H88NO10P    | 2 | 882.62450 | 881.61459 | [M+H] <sup>+</sup>     | 2.993 |
| C44H77O13P     | 1 | 883.47410 | 844.51018 | [M+K] <sup>+</sup>     | 0.867 |
| C48H77O10P     | 2 | 883.48520 | 844.52544 | [M+K] <sup>+</sup>     | 3.836 |
| C45H81O12P     | 1 | 883.50810 | 844.54657 | [M+K] <sup>+</sup>     | 1.832 |
| C56H82O6S      | 1 | 883.58810 | 882.58321 | [M+H] <sup>+</sup>     | 2.698 |
| C48H93O10P     | 1 | 883.64260 | 860.65064 | [M+Na] <sup>+</sup>    | 3.101 |
| C50H91O10P     | 2 | 883.64260 | 882.63499 | [M+H] <sup>+</sup>     | 0.386 |
| C56H92O6       | 1 | 883.67730 | 860.68939 | [M+Na] <sup>+</sup>    | 1.486 |
| C49H101N2O6P   | 1 | 883.70370 | 844.73973 | [M+K] <sup>+</sup>     | 0.931 |
| C48H82NO10P    | 1 | 884.54330 | 863.56764 | [M-2H+Na] <sup>-</sup> | 1.133 |
| C49H86NO8P     | 1 | 884.55370 | 847.60911 | [M-2H+K] <sup>-</sup>  | 4.531 |
| C47H92NO10P    | 1 | 884.63190 | 861.64589 | [M+Na] <sup>+</sup>    | 3.627 |

|                |   |           |           |           |       |
|----------------|---|-----------|-----------|-----------|-------|
| C48H96NO9P     | 1 | 884.67060 | 861.68227 | [M+Na]+   | 1.011 |
| C51H100NO8P    | 1 | 884.71310 | 885.71866 | [M-H]-    | 1.935 |
| C44H79O13P     | 1 | 885.48740 | 846.52583 | [M+K]+    | 1.789 |
| C48H79O10P     | 1 | 885.50610 | 846.54109 | [M+K]+    | 2.102 |
| C45H83O12P     | 1 | 885.52960 | 846.56222 | [M+K]+    | 4.778 |
| C45H83O13P     | 2 | 885.54770 | 862.55713 | [M+Na]+   | 1.519 |
| C47H81O13P     | 2 | 885.54770 | 884.54148 | [M+H]+    | 1.190 |
| C46H87O12P     | 2 | 885.58030 | 862.59352 | [M+Na]+   | 2.755 |
| C47H91O10P     | 1 | 885.59490 | 846.63499 | [M+K]+    | 3.657 |
| C48H95O9P      | 1 | 885.63700 | 846.67137 | [M+K]+    | 2.796 |
| C57H104O6      | 1 | 885.79380 | 884.78329 | [M+H]+    | 3.655 |
| C27H44N7O17P3S | 1 | 886.15940 | 863.17273 | [M+Na]+   | 2.881 |
| C48H82NO10P    | 2 | 886.56070 | 863.56764 | [M+Na]+   | 4.332 |
| C46H89NO11S    | 2 | 886.60850 | 863.61564 | [M+Na]+   | 4.107 |
| C50H90NO7P     | 1 | 886.60850 | 847.64549 | [M+K]+    | 0.161 |
| C52H88NO8P     | 1 | 886.63500 | 885.62476 | [M+H]+    | 3.352 |
| C49H92NO10P    | 1 | 886.65140 | 885.64589 | [M+H]+    | 1.983 |
| C44H81O13P     | 1 | 887.50020 | 848.54148 | [M+K]+    | 4.996 |
| C48H81O10P     | 2 | 887.52010 | 848.55674 | [M+K]+    | 0.238 |
| C49H85O10P     | 1 | 887.57390 | 864.58804 | [M+Na]+   | 3.786 |
| C56H96O6       | 2 | 887.71140 | 864.72069 | [M+Na]+   | 1.675 |
| C58H94O6       | 1 | 887.71140 | 886.70504 | [M+H]+    | 1.027 |
| C48H84NO9P     | 1 | 888.55100 | 849.58837 | [M+K]+    | 0.589 |
| C48H84NO10P    | 1 | 888.56850 | 865.58329 | [M+Na]+   | 4.512 |
| C49H88NO8P     | 1 | 888.58880 | 849.62476 | [M+K]+    | 1.004 |
| C50H92NO7P     | 1 | 888.62590 | 849.66114 | [M+K]+    | 1.808 |
| C49H94NO10P    | 1 | 888.67320 | 887.66154 | [M+H]+    | 4.942 |
| C51H102NO8P    | 1 | 888.74250 | 887.73431 | [M+H]+    | 1.037 |
| C46H75O13P     | 3 | 889.48100 | 866.49453 | [M+Na]+   | 3.097 |
| C47H79O12P     | 1 | 889.52400 | 866.53092 | [M+Na]+   | 4.339 |
| C44H83O13P     | 1 | 889.52400 | 850.55713 | [M+K]+    | 4.178 |
| C48H83O10P     | 1 | 889.53530 | 850.57239 | [M+K]+    | 0.269 |
| C45H87O12P     | 1 | 889.55250 | 850.59352 | [M+K]+    | 4.687 |
| C46H91O12P     | 1 | 889.61760 | 866.62482 | [M+Na]+   | 4.002 |
| C50H97O10P     | 1 | 889.69210 | 888.68194 | [M+H]+    | 3.249 |
| C58H96O6       | 1 | 889.72650 | 888.72069 | [M+H]+    | 1.643 |
| C56H98O6       | 1 | 889.72650 | 866.73634 | [M+Na]+   | 1.053 |
| C57H108O6      | 1 | 889.82450 | 888.81459 | [M+H]+    | 2.965 |
| C47H84NO10P    | 1 | 890.53090 | 853.58329 | [M-2H+K]- | 1.109 |
| C47H82NO10P    | 2 | 890.53130 | 851.56764 | [M+K]+    | 0.575 |
| C48H86NO9P     | 1 | 890.56870 | 851.60402 | [M+K]+    | 1.715 |
| C49H90NO8P     | 1 | 890.60500 | 851.64041 | [M+K]+    | 1.619 |
| C48H91NO11S    | 1 | 890.64210 | 889.63129 | [M+H]+    | 3.977 |
| C50H94NO7P     | 3 | 890.64210 | 851.67679 | [M+K]+    | 2.422 |
| C48H91NO13     | 1 | 890.65720 | 889.64905 | [M+H]+    | 0.994 |
| C50H94NO8P     | 1 | 890.66380 | 867.67171 | [M+Na]+   | 3.223 |
| C52H92NO8P     | 1 | 890.66380 | 889.65606 | [M+H]+    | 0.530 |
| C45H73O13P     | 1 | 891.44110 | 852.47888 | [M+K]+    | 1.048 |
| C46H77O13P     | 1 | 891.50370 | 868.51018 | [M+Na]+   | 4.818 |
| C52H76O12      | 1 | 891.52400 | 892.53368 | [M-H]-    | 2.704 |
| C49H89O10P     | 1 | 891.60690 | 868.61934 | [M+Na]+   | 1.862 |
| C48H91O12P     | 1 | 891.63420 | 890.62482 | [M+H]+    | 2.368 |
| C50H99O10P     | 1 | 891.70600 | 890.69759 | [M+H]+    | 1.280 |

|             |   |           |           |            |       |
|-------------|---|-----------|-----------|------------|-------|
| C47H51NO14  | 1 | 892.29280 | 853.33096 | [M+K]+     | 1.468 |
| C47H86NO10P | 2 | 892.54630 | 855.59894 | [M-2H+K]-  | 1.387 |
| C47H84NO10P | 2 | 892.54870 | 853.58329 | [M+K]+     | 2.534 |
| C49H92NO8P  | 1 | 892.61940 | 853.65606 | [M+K]+     | 0.215 |
| C48H93NO11S | 2 | 892.65560 | 891.64694 | [M+H]+     | 1.559 |
| C50H96NO7P  | 2 | 892.65560 | 853.69244 | [M+K]+     | 0.008 |
| C50H96NO8P  | 1 | 892.67820 | 869.68736 | [M+Na]+    | 1.816 |
| C52H94NO8P  | 1 | 892.67820 | 891.67171 | [M+H]+     | 0.872 |
| C45H75O13P  | 1 | 893.45590 | 854.49453 | [M+K]+     | 1.997 |
| C48H77O13P  | 3 | 893.51390 | 892.51018 | [M+H]+     | 3.978 |
| C46H79O13P  | 2 | 893.51880 | 870.52583 | [M+Na]+    | 4.191 |
| C52H76O12   | 3 | 893.53790 | 892.53368 | [M+H]+     | 3.415 |
| C57H92O6    | 1 | 893.66800 | 872.68939 | [M-2H+Na]- | 4.418 |
| C55H98O6    | 1 | 893.70100 | 854.73634 | [M+K]+     | 1.687 |
| C48H74NO10P | 1 | 894.47080 | 855.50504 | [M+K]+     | 2.920 |
| C50H82NO8P  | 1 | 894.53800 | 855.57781 | [M+K]+     | 3.307 |
| C49H94NO8P  | 1 | 894.63520 | 855.67171 | [M+K]+     | 0.382 |
| C50H84O7P2  | 2 | 895.51580 | 858.56923 | [M-2H+K]-  | 2.269 |
| C47H85O12P  | 1 | 895.56830 | 872.57787 | [M+Na]+    | 1.351 |
| C49H83O12P  | 1 | 895.56830 | 894.56222 | [M+H]+     | 1.328 |
| C48H89O10P  | 1 | 895.58210 | 856.61934 | [M+K]+     | 0.434 |
| C47H91O13P  | 1 | 895.62990 | 894.61973 | [M+H]+     | 3.233 |
| C48H95O12P  | 1 | 895.65980 | 894.65612 | [M+H]+     | 4.007 |
| C58H102O6   | 1 | 895.77080 | 894.76764 | [M+H]+     | 4.590 |
| C56H104O6   | 1 | 895.77080 | 872.78329 | [M+Na]+    | 1.912 |
| C47H88NO10P | 2 | 896.57400 | 857.61459 | [M+K]+     | 4.169 |
| C47H90NO10P | 1 | 896.57800 | 859.63024 | [M-2H+K]-  | 0.935 |
| C48H92NO9P  | 2 | 896.61360 | 857.65097 | [M+K]+     | 0.583 |
| C50H90NO10P | 2 | 896.63320 | 895.63024 | [M+H]+     | 4.805 |
| C48H92NO10P | 1 | 896.63320 | 873.64589 | [M+Na]+    | 2.129 |
| C50H100NO7P | 1 | 896.68520 | 857.72374 | [M+K]+     | 1.888 |
| C47H73O13P  | 1 | 897.45570 | 876.47888 | [M-2H+Na]- | 2.402 |
| C45H81O13P  | 1 | 897.48620 | 860.54148 | [M-2H+K]-  | 4.328 |
| C50H84O7P2  | 1 | 897.53160 | 858.56923 | [M+K]+     | 0.871 |
| C48H81O13P  | 2 | 897.54800 | 896.54148 | [M+H]+     | 0.840 |
| C46H83O13P  | 1 | 897.54850 | 874.55713 | [M+Na]+    | 2.390 |
| C50H83O10P  | 3 | 897.56350 | 874.57239 | [M+Na]+    | 2.106 |
| C48H93O10P  | 1 | 897.60020 | 860.65064 | [M-2H+K]-  | 1.071 |
| C49H95O10P  | 1 | 897.65660 | 874.66629 | [M+Na]+    | 1.214 |
| C56H106O6   | 1 | 897.78480 | 874.79894 | [M+Na]+    | 3.746 |
| C48H94NO10P | 1 | 898.64830 | 875.66154 | [M+Na]+    | 2.736 |
| C47H73O13P  | 1 | 899.46960 | 876.47888 | [M+Na]+    | 1.662 |
| C45H81O13P  | 1 | 899.50150 | 860.54148 | [M+K]+     | 3.484 |
| C50H85O10P  | 1 | 899.57480 | 876.58804 | [M+Na]+    | 2.735 |
| C49H87O12P  | 1 | 899.60320 | 898.59352 | [M+H]+     | 2.680 |
| C48H93O10P  | 1 | 899.61160 | 860.65064 | [M+K]+     | 2.433 |
| C49H97O10P  | 1 | 899.67470 | 876.68194 | [M+Na]+    | 3.935 |
| C55H104O6   | 1 | 899.74950 | 860.78329 | [M+K]+     | 3.399 |
| C52H80NO8P  | 1 | 900.54780 | 877.56216 | [M+Na]+    | 3.974 |
| C46H76O17   | 1 | 901.51760 | 900.50826 | [M+H]+     | 2.301 |
| C46H87O12P  | 1 | 901.55420 | 862.59352 | [M+K]+     | 2.739 |
| C46H89O12P  | 1 | 901.55750 | 864.60917 | [M-2H+K]-  | 0.298 |
| C48H87O13P  | 1 | 901.58550 | 902.58843 | [M-H]-     | 4.809 |

|                |   |           |           |            |       |
|----------------|---|-----------|-----------|------------|-------|
| C48H95O10P     | 1 | 901.62570 | 862.66629 | [M+K]+     | 4.147 |
| C57H88O8       | 1 | 901.65730 | 900.64792 | [M+H]+     | 2.338 |
| C56H94O6       | 1 | 901.66490 | 862.70504 | [M+K]+     | 3.651 |
| C47H98O11P2    | 1 | 901.66490 | 900.65844 | [M+H]+     | 0.901 |
| C55H106O6      | 1 | 901.76280 | 862.79894 | [M+K]+     | 0.785 |
| C27H44N7O18P3S | 3 | 902.15940 | 879.16765 | [M+Na]+    | 2.807 |
| C50H74NO10P    | 1 | 902.49040 | 879.50504 | [M+Na]+    | 4.276 |
| C46H89NO11S    | 1 | 902.58050 | 863.61564 | [M+K]+     | 1.897 |
| C46H89NO12S    | 1 | 902.59790 | 879.61055 | [M+Na]+    | 2.076 |
| C46H89NO13     | 1 | 902.59790 | 863.63340 | [M+K]+     | 1.501 |
| C52H104NO8P    | 1 | 902.76140 | 901.74996 | [M+H]+     | 4.621 |
| C47H79O12P     | 1 | 903.48220 | 866.53092 | [M-2H+K]-  | 2.967 |
| C49H75O13P     | 1 | 903.50390 | 902.49453 | [M+H]+     | 2.320 |
| C45H85O13P     | 1 | 903.53650 | 864.57278 | [M+K]+     | 0.626 |
| C49H85O10P     | 1 | 903.55520 | 864.58804 | [M+K]+     | 4.439 |
| C46H89O12P     | 1 | 903.56900 | 864.60917 | [M+K]+     | 3.673 |
| C50H89O10P     | 1 | 903.60470 | 880.61934 | [M+Na]+    | 4.272 |
| C49H91O12P     | 1 | 903.63140 | 902.62482 | [M+H]+     | 0.762 |
| C56H96O6       | 1 | 903.67980 | 864.72069 | [M+K]+     | 4.473 |
| C50H78NO10P    | 1 | 904.51220 | 883.53634 | [M-2H+Na]- | 1.329 |
| C50H92NO8P     | 1 | 904.61850 | 865.65606 | [M+K]+     | 0.783 |
| C50H75O10P     | 3 | 905.46960 | 866.50979 | [M+K]+     | 3.688 |
| C47H81O12P     | 1 | 905.49440 | 868.54657 | [M-2H+K]-  | 0.849 |
| C47H79O12P     | 2 | 905.49850 | 866.53092 | [M+K]+     | 4.893 |
| C47H79O13P     | 3 | 905.51730 | 882.52583 | [M+Na]+    | 2.479 |
| C49H77O13P     | 4 | 905.52110 | 904.51018 | [M+H]+     | 4.026 |
| C49H93O12P     | 2 | 905.64400 | 904.64047 | [M+H]+     | 4.129 |
| C57H102O6      | 1 | 905.75520 | 882.76764 | [M+Na]+    | 1.836 |
| C59H100O6      | 2 | 905.76300 | 904.75199 | [M+H]+     | 4.127 |
| C50H78NO10P    | 2 | 906.52340 | 883.53634 | [M+Na]+    | 2.382 |
| C47H81O12P     | 1 | 907.50540 | 868.54657 | [M+K]+     | 4.759 |
| C46H76O16      | 2 | 907.50540 | 884.51334 | [M+Na]+    | 3.127 |
| C47H83O12P     | 1 | 907.51480 | 870.56222 | [M-2H+K]-  | 4.387 |
| C49H79O13P     | 5 | 907.53280 | 906.52583 | [M+H]+     | 0.335 |
| C47H81O13P     | 3 | 907.53300 | 884.54148 | [M+Na]+    | 2.529 |
| C58H92O6       | 1 | 907.67450 | 884.68939 | [M+Na]+    | 4.531 |
| C56H100O6      | 1 | 907.71590 | 868.75199 | [M+K]+     | 0.835 |
| C59H102O6      | 3 | 907.77310 | 906.76764 | [M+H]+     | 1.996 |
| C57H104O6      | 1 | 907.77450 | 884.78329 | [M+Na]+    | 2.189 |
| C48H88NO10P    | 2 | 908.57780 | 869.61459 | [M+K]+     | 0.068 |
| C52H88NO8P     | 1 | 908.61090 | 885.62476 | [M+Na]+    | 3.389 |
| C49H92NO10P    | 1 | 908.63950 | 885.64589 | [M+Na]+    | 4.833 |
| C50H96NO8P     | 1 | 908.65470 | 869.68736 | [M+K]+     | 4.613 |
| C50H79O10P     | 2 | 909.50550 | 870.54109 | [M+K]+     | 1.386 |
| C49H81O13P     | 1 | 909.54460 | 908.54148 | [M+H]+     | 4.567 |
| C47H83O13P     | 2 | 909.54460 | 886.55713 | [M+Na]+    | 1.930 |
| C46H95O11PS    | 2 | 909.62180 | 886.63328 | [M+Na]+    | 0.767 |
| C50H95O10P     | 3 | 909.65260 | 886.66629 | [M+Na]+    | 3.199 |
| C29H50N7O18P3S | 2 | 910.22570 | 909.21460 | [M+H]+     | 4.211 |
| C50H82NO10P    | 1 | 910.55860 | 887.56764 | [M+Na]+    | 1.912 |
| C48H89NO13     | 1 | 910.62680 | 887.63340 | [M+Na]+    | 4.595 |
| C52H90NO8P     | 1 | 910.62680 | 887.64041 | [M+Na]+    | 3.107 |
| C49H94NO10P    | 1 | 910.64740 | 887.66154 | [M+Na]+    | 3.689 |

|                |   |           |           |            |       |
|----------------|---|-----------|-----------|------------|-------|
| C51H102NO8P    | 1 | 910.72410 | 887.73431 | [M+Na]+    | 0.627 |
| C42H64O19      | 2 | 911.36590 | 872.40419 | [M+K]+     | 1.576 |
| C47H85O12P     | 1 | 911.54130 | 872.57787 | [M+K]+     | 0.308 |
| C57H92O6       | 1 | 911.64990 | 872.68939 | [M+K]+     | 2.898 |
| C27H44N7O20P3S | 2 | 912.16140 | 911.15748 | [M+H]+     | 3.669 |
| C49H96NO10P    | 1 | 912.66300 | 889.67719 | [M+Na]+    | 3.735 |
| C47H87O12P     | 1 | 913.55450 | 874.59352 | [M+K]+     | 2.374 |
| C57H94O6       | 1 | 913.66540 | 874.70504 | [M+K]+     | 3.056 |
| C58H98O6       | 1 | 913.72980 | 890.73634 | [M+Na]+    | 4.637 |
| C60H96O6       | 1 | 913.72980 | 912.72069 | [M+H]+     | 2.012 |
| C56H106O6      | 1 | 913.76450 | 874.79894 | [M+K]+     | 2.635 |
| C50H86NO10P    | 1 | 914.58380 | 891.59894 | [M+Na]+    | 4.766 |
| C51H90NO8P     | 1 | 914.60570 | 875.64041 | [M+K]+     | 2.342 |
| C48H94NO10P    | 1 | 914.62610 | 875.66154 | [M+K]+     | 1.544 |
| C48H77O13P     | 1 | 915.49890 | 892.51018 | [M+Na]+    | 0.552 |
| C47H89O12P     | 1 | 915.57670 | 876.60917 | [M+K]+     | 4.785 |
| C49H87O13P     | 2 | 915.59160 | 914.58843 | [M+H]+     | 4.482 |
| C47H89O13P     | 2 | 915.59160 | 892.60408 | [M+Na]+    | 1.862 |
| C48H93O11P     | 1 | 915.60680 | 876.64555 | [M+K]+     | 2.079 |
| C59H110O6      | 1 | 915.83570 | 914.83024 | [M+H]+     | 1.979 |
| C50H88NO10P    | 1 | 916.60740 | 893.61459 | [M+Na]+    | 3.918 |
| C52H96NO8P     | 1 | 916.67690 | 893.68736 | [M+Na]+    | 0.350 |
| C50H87O10P     | 2 | 917.56810 | 878.60369 | [M+K]+     | 1.374 |
| C49H89O13P     | 1 | 917.61310 | 916.60408 | [M+H]+     | 1.903 |
| C48H95O12P     | 1 | 917.64610 | 894.65612 | [M+Na]+    | 0.828 |
| C57H98O6       | 1 | 917.70230 | 878.73634 | [M+K]+     | 3.060 |
| C50H74NO10P    | 1 | 918.46690 | 879.50504 | [M+K]+     | 1.402 |
| C50H90NO10P    | 2 | 918.62370 | 895.63024 | [M+Na]+    | 4.617 |
| C51H94NO8P     | 1 | 918.63160 | 879.67171 | [M+K]+     | 3.547 |
| C50H95NO13     | 1 | 918.69080 | 917.68035 | [M+H]+     | 3.467 |
| C52H98NO8P     | 1 | 918.69080 | 895.70301 | [M+Na]+    | 1.555 |
| C48H81O13P     | 1 | 919.52950 | 896.54148 | [M+Na]+    | 1.310 |
| C46H89O13P     | 1 | 919.56620 | 880.60408 | [M+K]+     | 1.124 |
| C49H85O12P     | 1 | 919.56620 | 896.57787 | [M+Na]+    | 0.968 |
| C47H93O12P     | 1 | 919.60060 | 880.64047 | [M+K]+     | 3.283 |
| C49H91O13P     | 2 | 919.62660 | 918.61973 | [M+H]+     | 0.439 |
| C54H104O9      | 1 | 919.75690 | 896.76804 | [M+Na]+    | 0.389 |
| C59H114O6      | 2 | 919.86840 | 918.86154 | [M+H]+     | 0.448 |
| C49H88NO10P    | 1 | 920.57610 | 881.61459 | [M+K]+     | 1.779 |
| C50H92NO10P    | 2 | 920.63490 | 897.64589 | [M+Na]+    | 0.227 |
| C50H97NO13     | 1 | 920.70290 | 919.69600 | [M+H]+     | 0.396 |
| C50H97O12P     | 1 | 921.68220 | 920.67177 | [M+H]+     | 3.430 |
| C61H92O6       | 2 | 921.70040 | 920.68939 | [M+H]+     | 4.056 |
| C57H102O6      | 1 | 921.73100 | 882.76764 | [M+K]+     | 0.226 |
| C60H104O6      | 1 | 921.79510 | 920.78329 | [M+H]+     | 4.923 |
| C50H94NO10P    | 1 | 922.64750 | 899.66154 | [M+Na]+    | 3.532 |
| C52H102NO8P    | 1 | 922.72680 | 899.73431 | [M+Na]+    | 3.545 |
| C49H75O13P     | 1 | 923.47050 | 902.49453 | [M-2H+Na]- | 1.414 |
| C46H76O17      | 1 | 923.49800 | 900.50826 | [M+Na]+    | 0.566 |
| C48H85O13P     | 1 | 923.55920 | 900.57278 | [M+Na]+    | 3.037 |
| C49H89O12P     | 1 | 923.60280 | 900.60917 | [M+Na]+    | 4.775 |
| C51H87O12P     | 1 | 923.60280 | 922.59352 | [M+H]+     | 2.177 |
| C50H93O10P     | 1 | 923.61170 | 884.65064 | [M+K]+     | 2.262 |

|                |   |           |           |            |       |
|----------------|---|-----------|-----------|------------|-------|
| C57H88O8       | 1 | 923.64120 | 900.64792 | [M+Na]+    | 4.392 |
| C47H98O11P2    | 2 | 923.64720 | 900.65844 | [M+Na]+    | 0.501 |
| C58H92O6       | 1 | 923.65230 | 884.68939 | [M+K]+     | 0.262 |
| C50H99O12P     | 1 | 923.69910 | 922.68742 | [M+H]+     | 4.775 |
| C60H106O6      | 1 | 923.80360 | 922.79894 | [M+H]+     | 2.827 |
| C58H108O6      | 1 | 923.80360 | 900.81459 | [M+Na]+    | 0.231 |
| C50H96NO10P    | 2 | 924.66970 | 901.67719 | [M+Na]+    | 3.559 |
| C49H75O13P     | 2 | 925.47930 | 902.49453 | [M+Na]+    | 4.814 |
| C49H77O13P     | 1 | 925.48810 | 904.51018 | [M-2H+Na]- | 3.518 |
| C45H82O15P2    | 2 | 925.52380 | 924.51290 | [M+H]+     | 3.920 |
| C47H85O13P     | 1 | 925.52550 | 888.57278 | [M-2H+K]-  | 4.447 |
| C52H76O14      | 1 | 925.53230 | 924.52351 | [M+H]+     | 1.641 |
| C49H91O12P     | 1 | 925.61850 | 902.62482 | [M+Na]+    | 4.818 |
| C51H89O12P     | 1 | 925.61850 | 924.60917 | [M+H]+     | 2.227 |
| C58H94O6       | 1 | 925.66480 | 886.70504 | [M+K]+     | 3.664 |
| C57H108O6      | 1 | 925.76540 | 888.81459 | [M-2H+K]-  | 2.385 |
| C50H87O13P     | 2 | 927.59280 | 926.58843 | [M+H]+     | 3.131 |
| C48H89O13P     | 2 | 927.59280 | 904.60408 | [M+Na]+    | 0.544 |
| C51H91O12P     | 2 | 927.62810 | 926.62482 | [M+H]+     | 4.300 |
| C49H93O12P     | 1 | 927.62810 | 904.64047 | [M+Na]+    | 1.714 |
| C60H110O6      | 2 | 927.83430 | 926.83024 | [M+H]+     | 3.462 |
| C58H112O6      | 1 | 927.83430 | 904.84589 | [M+Na]+    | 0.876 |
| C49H96NO10P    | 1 | 928.64150 | 889.67719 | [M+K]+     | 1.251 |
| C51H77O13P     | 2 | 929.51670 | 928.51018 | [M+H]+     | 0.811 |
| C47H87O13P     | 3 | 929.55270 | 890.58843 | [M+K]+     | 1.201 |
| C48H91O12P     | 1 | 929.58820 | 890.62482 | [M+K]+     | 0.248 |
| C50H99O10P     | 2 | 929.65990 | 890.69759 | [M+K]+     | 0.902 |
| C59H102O6      | 1 | 929.76090 | 906.76764 | [M+Na]+    | 4.342 |
| C61H100O6      | 2 | 929.76090 | 928.75199 | [M+H]+     | 1.762 |
| C57H110O6      | 2 | 929.79640 | 890.83024 | [M+K]+     | 3.235 |
| C29H48N7O17P3S | 1 | 930.16940 | 891.20403 | [M+K]+     | 2.385 |
| C48H93NO11S    | 1 | 930.61140 | 891.64694 | [M+K]+     | 1.410 |
| C48H93NO12S    | 1 | 930.63340 | 907.64185 | [M+Na]+    | 2.499 |
| C52H94NO8P     | 1 | 930.63340 | 891.67171 | [M+K]+     | 1.567 |
| C43H72O19      | 2 | 931.42870 | 892.46679 | [M+K]+     | 1.327 |
| C49H83O12P     | 1 | 931.51070 | 894.56222 | [M-2H+K]-  | 0.128 |
| C51H78O15      | 1 | 931.54510 | 930.53408 | [M+H]+     | 4.030 |
| C50H91O13P     | 1 | 931.62250 | 930.61973 | [M+H]+     | 4.835 |
| C48H93O13P     | 1 | 931.62250 | 908.63538 | [M+Na]+    | 2.259 |
| C49H97O12P     | 2 | 931.66310 | 908.67177 | [M+Na]+    | 2.265 |
| C51H95O12P     | 1 | 931.66310 | 930.65612 | [M+H]+     | 0.310 |
| C50H101O11P    | 1 | 931.69520 | 908.70815 | [M+Na]+    | 2.334 |
| C52H98O13      | 1 | 931.70660 | 930.70075 | [M+H]+     | 1.521 |
| C58H100O6      | 1 | 931.71940 | 892.75199 | [M+K]+     | 4.570 |
| C52H96NO8P     | 1 | 932.65280 | 893.68736 | [M+K]+     | 2.458 |
| C46H76O19      | 3 | 933.50300 | 932.49809 | [M+H]+     | 2.524 |
| C49H83O12P     | 1 | 933.52140 | 894.56222 | [M+K]+     | 4.252 |
| C51H81O13P     | 3 | 933.55270 | 932.54148 | [M+H]+     | 4.227 |
| C51H80O15      | 3 | 933.55440 | 932.54973 | [M+H]+     | 2.781 |
| C48H95O12P     | 1 | 933.62100 | 894.65612 | [M+K]+     | 1.854 |
| C50H93O13P     | 1 | 933.64210 | 932.63538 | [M+H]+     | 0.593 |
| C51H97O12P     | 1 | 933.68010 | 932.67177 | [M+H]+     | 1.136 |
| C51H99O12P     | 1 | 933.68380 | 934.68742 | [M-H]-     | 3.910 |

|                |   |           |           |                       |       |
|----------------|---|-----------|-----------|-----------------------|-------|
| C60H116O6      | 1 | 933.88360 | 932.87719 | [M+H] <sup>+</sup>    | 0.923 |
| C52H98NO8P     | 3 | 934.66960 | 895.70301 | [M+K] <sup>+</sup>    | 3.683 |
| C51H83O13P     | 3 | 935.55990 | 934.55713 | [M+H] <sup>+</sup>    | 4.814 |
| C49H85O13P     | 2 | 935.55990 | 912.57278 | [M+Na] <sup>+</sup>   | 2.250 |
| C50H95O13P     | 1 | 935.65840 | 934.65103 | [M+H] <sup>+</sup>    | 0.103 |
| C51H99O12P     | 2 | 935.69420 | 934.68742 | [M+H] <sup>+</sup>    | 0.523 |
| C62H94O6       | 1 | 935.71220 | 934.70504 | [M+H] <sup>+</sup>    | 0.120 |
| C58H104O6      | 2 | 935.74320 | 896.78329 | [M+K] <sup>+</sup>    | 3.465 |
| C52H100NO8P    | 1 | 936.68560 | 897.71866 | [M+K] <sup>+</sup>    | 4.048 |
| C48H83O13P     | 1 | 937.52040 | 898.55713 | [M+K] <sup>+</sup>    | 0.124 |
| C51H85O13P     | 1 | 937.57730 | 936.57278 | [M+H] <sup>+</sup>    | 2.937 |
| C49H87O13P     | 1 | 937.57730 | 914.58843 | [M+Na] <sup>+</sup>   | 0.379 |
| C59H94O6       | 1 | 937.66590 | 898.70504 | [M+K] <sup>+</sup>    | 2.444 |
| C51H101O12P    | 1 | 937.71200 | 936.70307 | [M+H] <sup>+</sup>    | 1.771 |
| C58H106O6      | 2 | 937.76600 | 898.79894 | [M+K] <sup>+</sup>    | 4.167 |
| C50H100NO12P   | 1 | 938.70300 | 937.69832 | [M+H] <sup>+</sup>    | 2.757 |
| C43H82O16P2    | 1 | 939.49410 | 916.50782 | [M+Na] <sup>+</sup>   | 3.127 |
| C48H85O13P     | 1 | 939.53950 | 900.57278 | [M+K] <sup>+</sup>    | 3.795 |
| C58H108O6      | 1 | 939.77520 | 900.81459 | [M+K] <sup>+</sup>    | 2.705 |
| C61H110O6      | 1 | 939.83610 | 938.83024 | [M+H] <sup>+</sup>    | 1.502 |
| C59H112O6      | 2 | 939.83610 | 916.84589 | [M+Na] <sup>+</sup>   | 1.050 |
| C50H96NO10P    | 1 | 940.64380 | 901.67719 | [M+K] <sup>+</sup>    | 3.680 |
| C49H75O13P     | 1 | 941.45570 | 902.49453 | [M+K] <sup>+</sup>    | 2.107 |
| C49H77O13P     | 1 | 941.45620 | 904.51018 | [M-2H+K] <sup>-</sup> | 2.745 |
| C48H87O13P     | 1 | 941.54970 | 902.58843 | [M+K] <sup>+</sup>    | 2.001 |
| C59H98O6       | 1 | 941.69870 | 902.73634 | [M+K] <sup>+</sup>    | 0.841 |
| C59H114O6      | 1 | 941.85420 | 918.86154 | [M+Na] <sup>+</sup>   | 3.649 |
| C61H112O6      | 1 | 941.85420 | 940.84589 | [M+H] <sup>+</sup>    | 1.102 |
| C31H52N7O17P3S | 1 | 942.22690 | 919.23533 | [M+Na] <sup>+</sup>   | 2.491 |
| C52H72O14      | 1 | 943.48270 | 920.49221 | [M+Na] <sup>+</sup>   | 1.344 |
| C51H91O13P     | 2 | 943.62340 | 942.61973 | [M+H] <sup>+</sup>    | 3.819 |
| C49H93O13P     | 2 | 943.62340 | 920.63538 | [M+Na] <sup>+</sup>   | 1.277 |
| C51H101O8PS    | 2 | 943.65570 | 904.69548 | [M+K] <sup>+</sup>    | 3.107 |
| C50H97O12P     | 1 | 943.65890 | 920.67177 | [M+Na] <sup>+</sup>   | 2.215 |
| C62H102O6      | 2 | 943.77260 | 942.76764 | [M+H] <sup>+</sup>    | 2.450 |
| C60H104O6      | 1 | 943.77330 | 920.78329 | [M+Na] <sup>+</sup>   | 0.834 |
| C61H114O6      | 1 | 943.86770 | 942.86154 | [M+H] <sup>+</sup>    | 1.178 |
| C48H91NO12S    | 1 | 944.58510 | 905.62620 | [M+K] <sup>+</sup>    | 4.502 |
| C50H83O13P     | 1 | 945.54400 | 922.55713 | [M+Na] <sup>+</sup>   | 2.491 |
| C51H87O12P     | 1 | 945.58470 | 922.59352 | [M+Na] <sup>+</sup>   | 2.073 |
| C48H91O13P     | 1 | 945.58470 | 906.61973 | [M+K] <sup>+</sup>    | 1.921 |
| C49H95O12P     | 1 | 945.62220 | 906.65612 | [M+K] <sup>+</sup>    | 3.100 |
| C51H93O13P     | 2 | 945.64000 | 944.63538 | [M+H] <sup>+</sup>    | 2.807 |
| C49H95O13P     | 2 | 945.64000 | 922.65103 | [M+Na] <sup>+</sup>   | 0.270 |
| C53H100O13     | 1 | 945.72100 | 944.71640 | [M+H] <sup>+</sup>    | 2.820 |
| C60H106O6      | 1 | 945.79190 | 922.79894 | [M+Na] <sup>+</sup>   | 3.951 |
| C62H104O6      | 1 | 945.79190 | 944.78329 | [M+H] <sup>+</sup>    | 1.415 |
| C61H116O6      | 2 | 945.88270 | 944.87719 | [M+H] <sup>+</sup>    | 1.863 |
| C52H99NO13     | 1 | 946.71680 | 945.71165 | [M+H] <sup>+</sup>    | 2.234 |
| C49H81O13P     | 1 | 947.50530 | 908.54148 | [M+K] <sup>+</sup>    | 0.703 |
| C48H93O13P     | 1 | 947.59390 | 908.63538 | [M+K] <sup>+</sup>    | 4.890 |
| C51H89O12P     | 2 | 947.59390 | 924.60917 | [M+Na] <sup>+</sup>   | 4.738 |
| C51H95O13P     | 2 | 947.65510 | 946.65103 | [M+H] <sup>+</sup>    | 3.381 |

|                |   |           |           |            |       |
|----------------|---|-----------|-----------|------------|-------|
| C60H92O6       | 2 | 947.65510 | 908.68939 | [M+K]+     | 2.699 |
| C50H101O11P    | 1 | 947.66810 | 908.70815 | [M+K]+     | 3.381 |
| C61H118O6      | 1 | 947.89970 | 946.89284 | [M+H]+     | 0.435 |
| C29H50N7O18P3S | 1 | 948.18020 | 909.21460 | [M+K]+     | 2.587 |
| C57H105NO9     | 1 | 948.78440 | 947.77894 | [M+H]+     | 1.903 |
| C49H83O13P     | 2 | 949.52240 | 910.55713 | [M+K]+     | 2.228 |
| C50H87O13P     | 1 | 949.57520 | 926.58843 | [M+Na]+    | 2.585 |
| C60H110O6      | 1 | 949.81670 | 926.83024 | [M+Na]+    | 2.909 |
| C54H106NO8P    | 1 | 950.75730 | 927.76561 | [M+Na]+    | 2.599 |
| C51H77O13P     | 1 | 951.50260 | 928.51018 | [M+Na]+    | 3.358 |
| C51H78O15      | 1 | 951.51240 | 930.53408 | [M-2H+Na]- | 3.851 |
| C51H99O13P     | 1 | 951.68730 | 950.68233 | [M+H]+     | 2.421 |
| C61H100O6      | 1 | 951.73860 | 928.75199 | [M+Na]+    | 2.745 |
| C59H108O6      | 1 | 951.77480 | 912.81459 | [M+K]+     | 3.091 |
| C60H114O6      | 1 | 951.83760 | 930.86154 | [M-2H+Na]- | 1.469 |
| C62H112O6      | 1 | 951.83760 | 952.84589 | [M-H]-     | 1.074 |
| C56H99NO9      | 2 | 952.71840 | 929.73199 | [M+Na]+    | 2.945 |
| C51H78O15      | 2 | 953.52270 | 930.53408 | [M+Na]+    | 0.626 |
| C50H91O13P     | 1 | 953.61240 | 930.61973 | [M+Na]+    | 3.613 |
| C52H89O13P     | 1 | 953.61240 | 952.60408 | [M+H]+     | 1.097 |
| C63H100O6      | 1 | 953.75790 | 952.75199 | [M+H]+     | 1.428 |
| C61H102O6      | 1 | 953.75790 | 930.76764 | [M+Na]+    | 1.087 |
| C58H112O9      | 2 | 953.83370 | 952.83064 | [M+H]+     | 4.411 |
| C60H114O6      | 2 | 953.85460 | 930.86154 | [M+Na]+    | 4.023 |
| C62H112O6      | 1 | 953.85460 | 952.84589 | [M+H]+     | 1.508 |
| C44H81N3O15P2  | 3 | 954.51700 | 953.51430 | [M+H]+     | 4.786 |
| C56H108NO8P    | 1 | 954.79280 | 953.78126 | [M+H]+     | 4.474 |
| C43H82O16P2    | 1 | 955.46650 | 916.50782 | [M+K]+     | 4.675 |
| C51H97O12P     | 1 | 955.65870 | 932.67177 | [M+Na]+    | 2.396 |
| C62H114O6      | 1 | 955.87130 | 954.86154 | [M+H]+     | 2.603 |
| C50H95NO13     | 1 | 956.64310 | 917.68035 | [M+K]+     | 0.413 |
| C50H95O13P     | 1 | 957.63740 | 934.65103 | [M+Na]+    | 2.981 |
| C51H99O12P     | 1 | 957.68060 | 934.68742 | [M+Na]+    | 4.135 |
| C61H106O6      | 1 | 957.79040 | 934.79894 | [M+Na]+    | 2.336 |
| C63H104O6      | 1 | 957.79040 | 956.78329 | [M+H]+     | 0.169 |
| C31H52N7O17P3S | 1 | 958.19530 | 919.23533 | [M+K]+     | 3.321 |
| C32H56N7O17P3S | 2 | 958.26050 | 935.26663 | [M+Na]+    | 4.849 |
| C56H112NO8P    | 1 | 958.82440 | 957.81256 | [M+H]+     | 4.768 |
| C53H83O13P     | 1 | 959.56180 | 958.55713 | [M+H]+     | 2.714 |
| C51H85O13P     | 1 | 959.56180 | 936.57278 | [M+Na]+    | 0.214 |
| C51H101O12P    | 1 | 959.69700 | 936.70307 | [M+Na]+    | 4.908 |
| C62H96O6       | 1 | 959.71140 | 936.72069 | [M+Na]+    | 1.549 |
| C54H102O13     | 1 | 959.73910 | 958.73205 | [M+H]+     | 0.226 |
| C61H108O6      | 2 | 959.80540 | 936.81459 | [M+Na]+    | 1.653 |
| C63H106O6      | 1 | 959.80540 | 958.79894 | [M+H]+     | 0.846 |
| C31H54N7O17P3S | 2 | 960.21300 | 921.25098 | [M+K]+     | 1.179 |
| C51H87O13P     | 1 | 961.57410 | 938.58843 | [M+Na]+    | 3.697 |
| C49H95O13P     | 1 | 961.61710 | 922.65103 | [M+K]+     | 3.032 |
| C61H94O6       | 1 | 961.67160 | 922.70504 | [M+K]+     | 3.544 |
| C52H97O13P     | 1 | 961.67160 | 960.66668 | [M+H]+     | 2.448 |
| C64H96O6       | 3 | 961.72580 | 960.72069 | [M+H]+     | 2.248 |
| C62H98O6       | 4 | 961.72580 | 938.73634 | [M+Na]+    | 0.246 |
| C52H76O14      | 1 | 963.49030 | 924.52351 | [M+K]+     | 3.777 |



|                |   |           |           |                        |       |
|----------------|---|-----------|-----------|------------------------|-------|
| C52H99O13P     | 1 | 963.68540 | 962.68233 | [M+H] <sup>+</sup>     | 4.362 |
| C61H96O6       | 1 | 963.68540 | 924.72069 | [M+K] <sup>+</sup>     | 1.617 |
| C62H100O6      | 1 | 963.74580 | 940.75199 | [M+Na] <sup>+</sup>    | 4.760 |
| C64H98O6       | 2 | 963.74760 | 962.73634 | [M+H] <sup>+</sup>     | 4.138 |
| C61H112O6      | 1 | 963.83040 | 940.84589 | [M+Na] <sup>+</sup>    | 4.890 |
| C61H114O6      | 1 | 963.83830 | 942.86154 | [M-2H+Na] <sup>-</sup> | 2.177 |
| C63H112O6      | 2 | 963.83830 | 964.84589 | [M-H] <sup>-</sup>     | 0.334 |
| C33H56N7O18P3S | 1 | 964.26990 | 963.26155 | [M+H] <sup>+</sup>     | 1.123 |
| C54H104NO8P    | 1 | 964.71620 | 925.74996 | [M+K] <sup>+</sup>     | 3.205 |
| C55H92O7P2     | 1 | 965.59970 | 926.63183 | [M+K] <sup>+</sup>     | 4.886 |
| C53H89O13P     | 1 | 965.60870 | 964.60408 | [M+H] <sup>+</sup>     | 2.749 |
| C51H91O13P     | 1 | 965.60870 | 942.61973 | [M+Na] <sup>+</sup>    | 0.264 |
| C62H102O6      | 1 | 965.76040 | 942.76764 | [M+Na] <sup>+</sup>    | 3.662 |
| C64H100O6      | 1 | 965.76040 | 964.75199 | [M+H] <sup>+</sup>     | 1.178 |
| C63H114O6      | 1 | 965.85120 | 966.86154 | [M-H] <sup>-</sup>     | 3.181 |
| C61H116O6      | 1 | 965.85120 | 944.87719 | [M-2H+Na] <sup>-</sup> | 0.675 |
| C33H58N7O18P3S | 1 | 966.28440 | 965.27720 | [M+H] <sup>+</sup>     | 0.069 |
| C54H95NO13     | 1 | 966.68530 | 965.68035 | [M+H] <sup>+</sup>     | 2.395 |
| C63H92O6       | 1 | 967.67490 | 944.68939 | [M+Na] <sup>+</sup>    | 3.837 |
| C53H100O13     | 1 | 967.70240 | 944.71640 | [M+Na] <sup>+</sup>    | 3.325 |
| C51H78O15      | 1 | 969.49980 | 930.53408 | [M+K] <sup>+</sup>     | 2.655 |
| C51H95O12P     | 1 | 969.61980 | 930.65612 | [M+K] <sup>+</sup>     | 0.548 |
| C52H98O13      | 1 | 969.66850 | 930.70075 | [M+K] <sup>+</sup>     | 4.747 |
| C63H94O6       | 1 | 969.69310 | 946.70504 | [M+Na] <sup>+</sup>    | 1.199 |
| C61H102O6      | 1 | 969.72970 | 930.76764 | [M+K] <sup>+</sup>     | 1.126 |
| C62H106O6      | 2 | 969.78530 | 946.79894 | [M+Na] <sup>+</sup>    | 2.952 |
| C64H104O6      | 1 | 969.78620 | 968.78329 | [M+H] <sup>+</sup>     | 4.498 |
| C60H114O6      | 1 | 969.82150 | 930.86154 | [M+K] <sup>+</sup>     | 3.291 |
| C63H116O6      | 1 | 969.88070 | 968.87719 | [M+H] <sup>+</sup>     | 3.879 |
| C61H118O6      | 1 | 969.88070 | 946.89284 | [M+Na] <sup>+</sup>    | 1.405 |
| C33H56N7O17P3S | 2 | 970.25220 | 947.26663 | [M+Na] <sup>+</sup>    | 3.765 |
| C51H97O13P     | 3 | 971.65130 | 948.66668 | [M+Na] <sup>+</sup>    | 4.739 |
| C53H95O13P     | 1 | 971.65570 | 970.65103 | [M+H] <sup>+</sup>     | 2.680 |
| C63H96O6       | 1 | 971.71260 | 948.72069 | [M+Na] <sup>+</sup>    | 2.765 |
| C65H94O6       | 1 | 971.71260 | 970.70504 | [M+H] <sup>+</sup>     | 0.296 |
| C51H99O12P     | 2 | 973.64900 | 934.68742 | [M+K] <sup>+</sup>     | 1.611 |
| C53H97O13P     | 1 | 973.67070 | 972.66668 | [M+H] <sup>+</sup>     | 3.342 |
| C62H94O6       | 1 | 973.67070 | 934.70504 | [M+K] <sup>+</sup>     | 2.576 |
| C51H99O13P     | 1 | 973.67070 | 950.68233 | [M+Na] <sup>+</sup>    | 0.878 |
| C63H98O6       | 1 | 973.72760 | 950.73634 | [M+Na] <sup>+</sup>    | 2.092 |
| C65H96O6       | 1 | 973.72760 | 972.72069 | [M+H] <sup>+</sup>     | 0.372 |
| C64H108O6      | 1 | 973.82060 | 972.81459 | [M+H] <sup>+</sup>     | 1.296 |
| C62H110O6      | 1 | 973.82060 | 950.83024 | [M+Na] <sup>+</sup>    | 1.168 |
| C62H112O6      | 1 | 973.82520 | 952.84589 | [M-2H+Na] <sup>-</sup> | 4.773 |
| C64H110O6      | 1 | 973.82520 | 974.83024 | [M-H] <sup>-</sup>     | 2.288 |
| C32H56N7O17P3S | 2 | 974.22530 | 935.26663 | [M+K] <sup>+</sup>     | 4.601 |
| C52H89O13P     | 1 | 975.59480 | 952.60408 | [M+Na] <sup>+</sup>    | 1.532 |
| C50H97O13P     | 1 | 975.63020 | 936.66668 | [M+K] <sup>+</sup>     | 0.375 |
| C62H96O6       | 1 | 975.68350 | 936.72069 | [M+K] <sup>+</sup>     | 0.351 |
| C54H102O14     | 2 | 975.72990 | 974.72696 | [M+H] <sup>+</sup>     | 4.440 |
| C65H98O6       | 1 | 975.73880 | 974.73634 | [M+H] <sup>+</sup>     | 4.932 |
| C61H108O6      | 1 | 975.77580 | 936.81459 | [M+K] <sup>+</sup>     | 1.990 |
| C64H110O6      | 1 | 975.83550 | 974.83024 | [M+H] <sup>+</sup>     | 2.062 |

|                |   |           |           |            |       |
|----------------|---|-----------|-----------|------------|-------|
| C62H112O6      | 1 | 975.83550 | 952.84589 | [M+Na]+    | 0.397 |
| C31H54N7O18P3S | 1 | 976.20840 | 937.24590 | [M+K]+     | 0.663 |
| C52H91NO13     | 1 | 976.61640 | 937.64905 | [M+K]+     | 4.306 |
| C61H94O8       | 1 | 977.68100 | 954.69487 | [M+Na]+    | 3.164 |
| C63H102O6      | 1 | 977.75840 | 954.76764 | [M+Na]+    | 1.572 |
| C65H100O6      | 1 | 977.75840 | 976.75199 | [M+H]+     | 0.882 |
| C62H114O6      | 1 | 977.85400 | 954.86154 | [M+Na]+    | 3.310 |
| C64H112O6      | 2 | 977.85660 | 976.84589 | [M+H]+     | 3.516 |
| C51H91O13P     | 1 | 979.56500 | 942.61973 | [M-2H+K]-  | 3.404 |
| C51H89O13P     | 1 | 979.57160 | 940.60408 | [M+K]+     | 4.457 |
| C53H103O13P    | 1 | 979.71620 | 978.71363 | [M+H]+     | 4.801 |
| C46H83N3O15P2  | 1 | 980.53450 | 979.52995 | [M+H]+     | 2.772 |
| C56H112NO8P    | 1 | 980.79960 | 957.81256 | [M+Na]+    | 2.222 |
| C53H83O13P     | 1 | 981.54750 | 958.55713 | [M+Na]+    | 1.167 |
| C54H102O13     | 2 | 981.71900 | 958.73205 | [M+Na]+    | 2.310 |
| C63H106O6      | 1 | 981.78520 | 958.79894 | [M+Na]+    | 3.018 |
| C61H116O6      | 1 | 981.83060 | 944.87719 | [M-2H+K]-  | 4.897 |
| C63H92O6       | 1 | 983.65200 | 944.68939 | [M+K]+     | 0.551 |
| C52H97O13P     | 1 | 983.65400 | 960.66668 | [M+Na]+    | 1.937 |
| C63H98O8       | 2 | 983.73430 | 982.72617 | [M+H]+     | 0.872 |
| C62H104O6      | 1 | 983.74890 | 944.78329 | [M+K]+     | 2.499 |
| C65H108O6      | 2 | 983.80350 | 984.81459 | [M-H]-     | 3.885 |
| C63H110O6      | 1 | 983.80350 | 962.83024 | [M-2H+Na]- | 1.425 |
| C65H106O6      | 2 | 983.81100 | 982.79894 | [M+H]+     | 4.867 |
| C61H118O6      | 1 | 983.84130 | 946.89284 | [M-2H+K]-  | 0.144 |
| C62H120O6      | 1 | 983.89310 | 960.90849 | [M+Na]+    | 4.688 |
| C52H99NO13     | 1 | 984.67170 | 945.71165 | [M+K]+     | 3.143 |
| C58H116NO8P    | 1 | 984.83180 | 985.84386 | [M-H]-     | 4.862 |
| C52H98O14      | 2 | 985.65940 | 946.69566 | [M+K]+     | 0.597 |
| C63H94O6       | 1 | 985.67280 | 946.70504 | [M+K]+     | 4.675 |
| C52H99O13P     | 2 | 985.67280 | 962.68233 | [M+Na]+    | 1.263 |
| C62H106O6      | 1 | 985.75850 | 946.79894 | [M+K]+     | 3.644 |
| C63H112O6      | 1 | 985.81580 | 964.84589 | [M-2H+Na]- | 4.820 |
| C65H108O6      | 1 | 985.81860 | 984.81459 | [M+H]+     | 3.309 |
| C63H110O6      | 1 | 985.81860 | 962.83024 | [M+Na]+    | 0.875 |
| C65H110O6      | 1 | 985.82740 | 986.83024 | [M-H]-     | 4.492 |
| C61H118O6      | 1 | 985.85360 | 946.89284 | [M+K]+     | 2.426 |
| C64H120O6      | 1 | 985.91210 | 984.90849 | [M+H]+     | 3.714 |
| C52H101NO13    | 1 | 986.68680 | 947.72730 | [M+K]+     | 3.695 |
| C57H106NO8P    | 2 | 986.75110 | 963.76561 | [M+Na]+    | 3.779 |
| C58H116NO8P    | 1 | 986.85320 | 985.84386 | [M+H]+     | 2.100 |
| C63H96O6       | 3 | 987.68580 | 948.72069 | [M+K]+     | 1.982 |
| C52H101O13P    | 2 | 987.68580 | 964.69798 | [M+Na]+    | 1.423 |
| C64H100O6      | 1 | 987.74270 | 964.75199 | [M+Na]+    | 1.505 |
| C56H106O13     | 2 | 987.76690 | 986.76335 | [M+H]+     | 3.763 |
| C65H110O6      | 1 | 987.83380 | 986.83024 | [M+H]+     | 3.758 |
| C63H112O6      | 1 | 987.83380 | 964.84589 | [M+Na]+    | 1.329 |
| C64H122O6      | 1 | 987.93070 | 986.92414 | [M+H]+     | 0.721 |
| C54H95NO13     | 1 | 988.66950 | 965.68035 | [M+Na]+    | 0.067 |
| C46H82O16P2    | 1 | 989.45970 | 952.50782 | [M-2H+K]-  | 3.318 |
| C53H91O13P     | 1 | 989.60460 | 966.61973 | [M+Na]+    | 4.401 |
| C53H93O13P     | 1 | 991.62170 | 968.63538 | [M+Na]+    | 2.930 |
| C51H94N2O16    | 1 | 991.66630 | 990.66034 | [M+H]+     | 1.320 |

|                |   |            |            |            |       |
|----------------|---|------------|------------|------------|-------|
| C63H100O6      | 1 | 991.71240  | 952.75199  | [M+K]+     | 2.765 |
| C53H79O13P     | 3 | 993.48620  | 954.52583  | [M+K]+     | 2.802 |
| C52H93O13P     | 1 | 993.58020  | 956.63538  | [M-2H+K]-  | 3.808 |
| C65H94O6       | 1 | 993.69280  | 970.70504  | [M+Na]+    | 1.472 |
| C66H104O6      | 1 | 993.78600  | 992.78329  | [M+H]+     | 4.591 |
| C64H106O6      | 1 | 993.78600  | 970.79894  | [M+Na]+    | 2.177 |
| C62H114O6      | 1 | 993.82960  | 954.86154  | [M+K]+     | 4.938 |
| C65H116O6      | 1 | 993.88070  | 992.87719  | [M+H]+     | 3.785 |
| C63H118O6      | 1 | 993.88070  | 970.89284  | [M+Na]+    | 1.371 |
| C35H62N7O18P3S | 1 | 994.31340  | 993.30850  | [M+H]+     | 2.381 |
| C65H96O6       | 1 | 995.70970  | 972.72069  | [M+Na]+    | 0.214 |
| C64H108O6      | 1 | 995.80170  | 972.81459  | [M+Na]+    | 2.122 |
| C66H106O6      | 2 | 995.80370  | 994.79894  | [M+H]+     | 2.523 |
| C64H96O6       | 1 | 997.66440  | 960.72069  | [M-2H+K]-  | 4.903 |
| C53H99O13P     | 1 | 997.67650  | 974.68233  | [M+Na]+    | 4.957 |
| C67H96O6       | 2 | 997.73270  | 996.72069  | [M+H]+     | 4.749 |
| C66H108O6      | 2 | 997.81900  | 996.81459  | [M+H]+     | 2.868 |
| C64H110O6      | 1 | 997.81900  | 974.83024  | [M+Na]+    | 0.464 |
| C62H118O6      | 1 | 997.85150  | 958.89284  | [M+K]+     | 4.502 |
| C53H101O13P    | 1 | 999.68520  | 976.69798  | [M+Na]+    | 2.006 |
| C67H98O6       | 1 | 999.74160  | 998.73634  | [M+H]+     | 2.013 |
| C64H112O6      | 1 | 999.83100  | 976.84589  | [M+Na]+    | 4.114 |
| C66H110O6      | 1 | 999.83880  | 998.83024  | [M+H]+     | 1.288 |
| C64H116O6      | 1 | 1001.84870 | 980.87719  | [M-2H+Na]- | 3.146 |
| C48H85N3O15P2  | 1 | 1004.53560 | 1005.54560 | [M-H]-     | 2.716 |
| C56H99NO13     | 1 | 1014.68550 | 993.71165  | [M-2H+Na]- | 0.793 |
| C67H126O6      | 1 | 1025.94410 | 1026.95544 | [M-H]-     | 3.969 |
| C48H85N3O15P2  | 1 | 1026.52110 | 1005.54560 | [M-2H+Na]- | 0.820 |
| C69H108O6      | 1 | 1031.81040 | 1032.81459 | [M-H]-     | 2.983 |
| C66H122O6      | 1 | 1031.90360 | 1010.92414 | [M-2H+Na]- | 4.650 |
| C68H120O6      | 1 | 1031.90360 | 1032.90849 | [M-H]-     | 2.304 |
| C66H125NO5     | 1 | 1032.93300 | 1011.95578 | [M-2H+Na]- | 2.482 |
| C68H132O6      | 1 | 1043.99470 | 1045.00239 | [M-H]-     | 0.404 |
| C61H101O9P     | 1 | 1045.66320 | 1008.71832 | [M-2H+K]-  | 3.561 |
| C69H122O6      | 1 | 1045.92160 | 1046.92414 | [M-H]-     | 4.520 |
| C66H122O6      | 1 | 1047.87520 | 1010.92414 | [M-2H+K]-  | 2.346 |
| C39H64N7O17P3S | 1 | 1048.30760 | 1027.32923 | [M-2H+Na]- | 3.537 |
| C67H112O6      | 1 | 1049.79180 | 1012.84589 | [M-2H+K]-  | 2.564 |
| C66H124O6      | 1 | 1049.88600 | 1012.93979 | [M-2H+K]-  | 2.278 |
| C69H126O6      | 2 | 1049.95160 | 1050.95544 | [M-H]-     | 3.265 |
| C69H128O6      | 2 | 1051.95990 | 1052.97109 | [M-H]-     | 3.728 |
| C67H130O6      | 2 | 1051.95990 | 1030.98674 | [M-2H+Na]- | 1.428 |
| C69H130O6      | 2 | 1053.97740 | 1054.98674 | [M-H]-     | 1.966 |
| C58H101NO13    | 1 | 1056.67550 | 1019.72730 | [M-2H+K]-  | 0.375 |
| C68H124O6      | 1 | 1057.91920 | 1036.93979 | [M-2H+Na]- | 4.488 |
| C69H134O6      | 3 | 1058.00810 | 1059.01804 | [M-H]-     | 2.525 |
| C51H82O23      | 1 | 1061.52260 | 1062.52470 | [M-H]-     | 4.873 |
| C51H84O23      | 1 | 1063.53540 | 1064.54035 | [M-H]-     | 2.184 |
| C68H132O6      | 2 | 1065.97740 | 1045.00239 | [M-2H+Na]- | 0.326 |
| C68H118O6      | 1 | 1067.84270 | 1030.89284 | [M-2H+K]-  | 1.178 |
| C67H130O6      | 1 | 1067.93770 | 1030.98674 | [M-2H+K]-  | 2.208 |
| C69H124O6      | 1 | 1069.91570 | 1048.93979 | [M-2H+Na]- | 1.166 |
| C69H126O6      | 2 | 1071.92900 | 1050.95544 | [M-2H+Na]- | 1.028 |

|                |   |            |            |            |       |
|----------------|---|------------|------------|------------|-------|
| C69H128O6      | 1 | 1073.94820 | 1052.97109 | [M-2H+Na]- | 2.279 |
| C69H130O6      | 1 | 1075.96610 | 1054.98674 | [M-2H+Na]- | 4.366 |
| C68H130O6      | 1 | 1079.93370 | 1042.98674 | [M-2H+K]-  | 1.520 |
| C43H70N7O17P3S | 1 | 1080.37390 | 1081.37618 | [M-H]-     | 4.617 |
| C69H120O6      | 1 | 1081.85630 | 1044.90849 | [M-2H+K]-  | 0.732 |
| C68H132O6      | 1 | 1081.95100 | 1045.00239 | [M-2H+K]-  | 0.007 |
| C55H102N2O16   | 1 | 1083.67090 | 1046.72294 | [M-2H+K]-  | 0.590 |
| C69H122O6      | 1 | 1083.87690 | 1046.92414 | [M-2H+K]-  | 3.836 |
| C69H126O6      | 1 | 1087.90710 | 1050.95544 | [M-2H+K]-  | 2.811 |
| C69H128O6      | 1 | 1089.91890 | 1052.97109 | [M-2H+K]-  | 0.727 |
| C69H130O6      | 1 | 1091.93440 | 1054.98674 | [M-2H+K]-  | 0.863 |
| C43H78N7O17P3S | 1 | 1126.38530 | 1089.43878 | [M-2H+K]-  | 1.848 |
| C61H114N2O16   | 1 | 1129.81030 | 1130.81684 | [M-H]-     | 0.647 |
| C45H68N7O18P3S | 1 | 1140.32450 | 1119.35545 | [M-2H+Na]- | 4.917 |
| C77H150O3      | 1 | 1160.10720 | 1123.15850 | [M-2H+K]-  | 0.088 |
| C62H116N2O18   | 1 | 1175.81650 | 1176.82232 | [M-H]-     | 1.233 |
| C85H140O       | 3 | 1176.08490 | 1177.09042 | [M-H]-     | 1.491 |
| C85H140O       | 1 | 1198.06820 | 1177.09042 | [M-2H+Na]- | 2.607 |
| C60H111NO21    | 1 | 1202.74390 | 1181.76487 | [M-2H+Na]- | 3.637 |
| C62H114N2O18   | 1 | 1211.75260 | 1174.80667 | [M-2H+K]-  | 2.203 |
| C63H115NO21    | 1 | 1220.79440 | 1221.79617 | [M-H]-     | 4.509 |
| C59H100O26     | 1 | 1223.64280 | 1224.65029 | [M-H]-     | 0.181 |
| C60H111NO22    | 2 | 1234.70710 | 1197.75978 | [M-2H+K]-  | 1.037 |
| C57H92O27      | 1 | 1245.53170 | 1208.58261 | [M-2H+K]-  | 0.396 |
| C62H115NO21    | 1 | 1246.74190 | 1209.79617 | [M-2H+K]-  | 2.299 |
| C82H154O6      | 1 | 1272.12940 | 1235.17454 | [M-2H+K]-  | 4.919 |
| C66H123NO22    | 1 | 1280.84950 | 1281.85368 | [M-H]-     | 2.412 |
| C66H123NO23    | 1 | 1296.83940 | 1297.84860 | [M-H]-     | 1.485 |
| C66H123NO22    | 1 | 1302.83060 | 1281.85368 | [M-2H+Na]- | 1.734 |
| C66H122N2O23   | 1 | 1309.83180 | 1310.84385 | [M-H]-     | 3.645 |
| C67H122N2O21   | 1 | 1311.82330 | 1290.85402 | [M-2H+Na]- | 4.097 |
| C86H172O6      | 1 | 1322.28630 | 1301.31539 | [M-2H+Na]- | 2.838 |
| C80H128O14     | 1 | 1333.90080 | 1312.93041 | [M-2H+Na]- | 3.203 |
| C63H114N2O26   | 1 | 1335.74200 | 1314.76599 | [M-2H+Na]- | 1.011 |
| C82H134O14     | 1 | 1341.97080 | 1342.97740 | [M-H]-     | 0.499 |
| C64H117NO28    | 1 | 1346.77500 | 1347.77622 | [M-H]-     | 4.491 |
| C80H128O14     | 2 | 1349.88290 | 1312.93041 | [M-2H+K]-  | 2.880 |
| C66H121N3O23   | 1 | 1360.79080 | 1323.83909 | [M-2H+K]-  | 2.283 |
| C64H117NO27    | 1 | 1368.73260 | 1331.78131 | [M-2H+K]-  | 1.968 |
| C62H121NO26P2  | 1 | 1378.73690 | 1357.76522 | [M-2H+Na]- | 2.158 |
| C66H121NO28    | 1 | 1396.78370 | 1375.80752 | [M-2H+Na]- | 1.087 |
| C77H146O17P2   | 1 | 1404.00090 | 1405.00353 | [M-H]-     | 3.303 |
| C65H117N3O27   | 1 | 1408.73850 | 1371.78745 | [M-2H+K]-  | 1.737 |
| C69H125N3O26   | 1 | 1410.84820 | 1411.85514 | [M-H]-     | 0.235 |
| C70H129NO27    | 1 | 1414.87040 | 1415.87521 | [M-H]-     | 1.742 |
| C69H126N2O26   | 1 | 1419.83620 | 1398.85989 | [M-2H+Na]- | 1.162 |
| C71H128N2O26   | 1 | 1423.87310 | 1424.87554 | [M-H]-     | 3.392 |
| C69H125N3O27   | 2 | 1426.84490 | 1427.85005 | [M-H]-     | 1.484 |
| C70H129NO27    | 1 | 1436.85470 | 1415.87521 | [M-2H+Na]- | 3.364 |
| C71H129N3O26   | 1 | 1438.87850 | 1439.88644 | [M-H]-     | 0.464 |
| C68H130N2O23P2 | 1 | 1441.80740 | 1404.85397 | [M-2H+K]-  | 3.350 |
| C77H146O17P2   | 1 | 1441.95780 | 1405.00353 | [M-2H+K]-  | 3.930 |
| C72H133N3O23   | 1 | 1444.87840 | 1407.93299 | [M-2H+K]-  | 2.211 |

|                |   |            |            |            |       |
|----------------|---|------------|------------|------------|-------|
| C70H128N2O27   | 1 | 1449.85080 | 1428.87046 | [M-2H+Na]- | 3.921 |
| C92H182O11     | 1 | 1462.36040 | 1463.36822 | [M-H]-     | 0.375 |
| C71H130N2O26   | 1 | 1463.84570 | 1426.89119 | [M-2H+K]-  | 4.037 |
| C70H129N2O28   | 1 | 1468.82320 | 1431.87012 | [M-2H+K]-  | 3.049 |
| C70H125N3O29   | 1 | 1470.82770 | 1471.83988 | [M-H]-     | 3.340 |
| C71H129N3O26   | 1 | 1476.84170 | 1439.88644 | [M-2H+K]-  | 4.511 |
| C72H133N2O27   | 1 | 1480.84880 | 1443.90651 | [M-2H+K]-  | 4.258 |
| C67H119N3O31   | 1 | 1482.76000 | 1461.78276 | [M-2H+Na]- | 1.738 |
| C92H182O11     | 1 | 1484.35000 | 1463.36822 | [M-2H+Na]- | 4.798 |
| C74H135N2O28   | 1 | 1484.90340 | 1485.91707 | [M-H]-     | 4.311 |
| C74H137N2O28   | 1 | 1486.92440 | 1487.93272 | [M-H]-     | 0.707 |
| C74H135N2O27   | 1 | 1490.89410 | 1469.92216 | [M-2H+Na]- | 1.822 |
| C74H137N2O27   | 1 | 1492.91310 | 1471.93781 | [M-2H+Na]- | 0.425 |
| C72H129N3O29   | 1 | 1498.87120 | 1499.87118 | [M-H]-     | 4.861 |
| C73H133N3O26   | 1 | 1504.87210 | 1467.91774 | [M-2H+K]-  | 3.828 |
| C76H138N2O27   | 1 | 1509.93440 | 1510.94871 | [M-H]-     | 4.659 |
| C71H127N3O31   | 1 | 1516.83870 | 1517.84536 | [M-H]-     | 0.400 |
| C75H137N3O26   | 2 | 1516.91850 | 1495.94904 | [M-2H+Na]- | 3.427 |
| C74H134N2O27   | 1 | 1519.86740 | 1482.91741 | [M-2H+K]-  | 0.918 |
| C74H137N2O28   | 1 | 1524.87790 | 1487.93272 | [M-2H+K]-  | 2.243 |
| C74H133N3O29   | 1 | 1526.89510 | 1527.90248 | [M-H]-     | 0.075 |
| C76H138N2O27   | 1 | 1531.92760 | 1510.94871 | [M-2H+Na]- | 2.764 |
| C71H127N3O32   | 1 | 1532.83670 | 1533.84028 | [M-H]-     | 2.408 |
| C75H137N3O26   | 1 | 1532.89450 | 1495.94904 | [M-2H+K]-  | 2.048 |
| C72H130N2O32   | 1 | 1533.85990 | 1534.86068 | [M-H]-     | 4.231 |
| C76H140N2O27   | 1 | 1533.94240 | 1512.96436 | [M-2H+Na]- | 2.207 |
| C74H134N2O28   | 1 | 1535.85700 | 1498.91232 | [M-2H+K]-  | 2.552 |
| C89H182O13P2   | 1 | 1542.28180 | 1521.30557 | [M-2H+Na]- | 1.016 |
| C74H134N2O31   | 1 | 1545.89070 | 1546.89707 | [M-H]-     | 0.585 |
| C75H137N3O27   | 1 | 1548.89460 | 1511.94395 | [M-2H+K]-  | 1.321 |
| C76H140N2O27   | 1 | 1549.91910 | 1512.96436 | [M-2H+K]-  | 3.965 |
| C74H135N3O28   | 1 | 1550.87470 | 1513.92322 | [M-2H+K]-  | 1.858 |
| C71H127N3O32   | 1 | 1554.80810 | 1533.84028 | [M-2H+Na]- | 4.399 |
| C78H148N2O24P2 | 1 | 1557.98730 | 1558.98974 | [M-H]-     | 3.103 |
| C72H131N3O33   | 1 | 1558.83230 | 1537.86035 | [M-2H+Na]- | 1.736 |
| C73H131N3O32   | 1 | 1560.86690 | 1561.87158 | [M-H]-     | 1.660 |
| C76H139N3O28   | 1 | 1562.93660 | 1541.95452 | [M-2H+Na]- | 4.748 |
| C74H135N3O33   | 1 | 1564.89050 | 1565.89165 | [M-H]-     | 3.913 |
| C73H131N3O31   | 2 | 1566.84710 | 1545.87666 | [M-2H+Na]- | 2.696 |
| C78H141N3O28   | 1 | 1566.96050 | 1567.97017 | [M-H]-     | 1.531 |
| C89H166O17P2   | 1 | 1568.15780 | 1569.16003 | [M-H]-     | 3.212 |
| C71H127N3O32   | 1 | 1570.78560 | 1533.84028 | [M-2H+K]-  | 2.087 |
| C75H135N3O31   | 1 | 1572.90380 | 1573.90796 | [M-H]-     | 1.975 |
| C74H134N2O33   | 1 | 1577.88660 | 1578.88690 | [M-H]-     | 4.420 |
| C78H139N3O29   | 2 | 1580.93730 | 1581.94943 | [M-H]-     | 3.077 |
| C73H131N3O32   | 1 | 1582.84220 | 1561.87158 | [M-2H+Na]- | 2.552 |
| C78H141N3O29   | 1 | 1582.95000 | 1583.96508 | [M-H]-     | 4.936 |
| C75H135N3O32   | 1 | 1588.89240 | 1589.90288 | [M-H]-     | 2.020 |
| C78H141N3O28   | 1 | 1588.93760 | 1567.97017 | [M-2H+Na]- | 4.550 |
| C76H138N2O32   | 1 | 1589.91480 | 1590.92328 | [M-H]-     | 0.761 |
| C94H192O13P2   | 1 | 1590.37050 | 1591.38382 | [M-H]-     | 3.806 |
| C78H148N2O24P2 | 1 | 1595.93820 | 1558.98974 | [M-2H+K]-  | 0.085 |
| C75H136N2O31   | 1 | 1597.85800 | 1560.91272 | [M-2H+K]-  | 2.075 |

|              |   |            |            |            |       |
|--------------|---|------------|------------|------------|-------|
| C73H131N3O32 | 1 | 1598.81650 | 1561.87158 | [M-2H+K]-  | 2.301 |
| C74H134N2O32 | 1 | 1599.84510 | 1562.89198 | [M-2H+K]-  | 2.825 |
| C76H137N3O32 | 1 | 1602.91800 | 1603.91853 | [M-H]-     | 4.205 |
| C78H139N3O29 | 1 | 1602.91800 | 1581.94943 | [M-2H+Na]- | 3.802 |
| C78H141N3O29 | 1 | 1604.94210 | 1583.96508 | [M-2H+Na]- | 1.468 |
| C89H166O17P2 | 1 | 1606.10110 | 1569.16003 | [M-2H+K]-  | 4.690 |
| C77H138N2O31 | 1 | 1607.89920 | 1586.92837 | [M-2H+Na]- | 2.379 |
| C75H135N3O31 | 1 | 1610.85480 | 1573.90796 | [M-2H+K]-  | 1.095 |
| C75H135N3O32 | 1 | 1610.88350 | 1589.90288 | [M-2H+Na]- | 3.700 |
| C76H138N2O32 | 2 | 1611.89030 | 1590.92328 | [M-2H+Na]- | 4.740 |
| C74H134N2O33 | 1 | 1615.83630 | 1578.88690 | [M-2H+K]-  | 0.498 |
| C76H137N3O33 | 1 | 1618.91330 | 1619.91344 | [M-H]-     | 4.402 |
| C78H143NO33  | 1 | 1620.94680 | 1621.95425 | [M-H]-     | 0.109 |
| C76H138N2O33 | 1 | 1627.89850 | 1606.91820 | [M-2H+Na]- | 3.468 |
| C80H144N2O31 | 1 | 1627.97320 | 1628.97532 | [M-H]-     | 3.167 |
| C94H192O13P2 | 1 | 1628.32500 | 1591.38382 | [M-2H+K]-  | 4.559 |
| C74H133N3O33 | 1 | 1628.82650 | 1591.88214 | [M-2H+K]-  | 2.606 |
| C79H143N3O31 | 1 | 1628.96020 | 1629.97056 | [M-H]-     | 1.899 |
| C76H139NO33  | 1 | 1630.87660 | 1593.92295 | [M-2H+K]-  | 3.099 |
| C78H141N3O32 | 1 | 1630.93830 | 1631.94983 | [M-H]-     | 2.611 |
| C78H142N2O33 | 1 | 1633.94060 | 1634.94950 | [M-H]-     | 0.995 |
| C79H144N2O31 | 1 | 1637.94590 | 1616.97532 | [M-2H+Na]- | 2.488 |
| C94H190NO15P | 1 | 1641.32980 | 1604.38732 | [M-2H+K]-  | 3.726 |
| C79H141N3O32 | 1 | 1642.94690 | 1643.94983 | [M-H]-     | 2.642 |
| C76H134N4O34 | 1 | 1645.88720 | 1646.88796 | [M-H]-     | 3.957 |
| C80H145NO33  | 1 | 1646.96960 | 1647.96990 | [M-H]-     | 4.234 |
| C80H144N2O31 | 1 | 1649.94680 | 1628.97532 | [M-2H+Na]- | 1.924 |
| C76H136N4O33 | 1 | 1653.88450 | 1632.90869 | [M-2H+Na]- | 0.694 |
| C79H144N2O31 | 1 | 1653.92300 | 1616.97532 | [M-2H+K]-  | 0.553 |
| C78H141NO33  | 1 | 1656.89410 | 1619.93860 | [M-2H+K]-  | 4.167 |
| C78H143NO33  | 1 | 1658.90710 | 1621.95425 | [M-2H+K]-  | 2.564 |
| C80H144N2O31 | 2 | 1665.91640 | 1628.97532 | [M-2H+K]-  | 4.511 |
| C79H143N3O32 | 1 | 1666.93800 | 1645.96548 | [M-2H+Na]- | 1.283 |
| C80H146N2O32 | 1 | 1667.95260 | 1646.98588 | [M-2H+Na]- | 4.760 |
| C78H141N3O32 | 1 | 1668.89450 | 1631.94983 | [M-2H+K]-  | 2.354 |
| C78H141N3O33 | 2 | 1668.91250 | 1647.94474 | [M-2H+Na]- | 4.137 |
| C80H145NO33  | 1 | 1668.95070 | 1647.96990 | [M-2H+Na]- | 3.681 |
| C76H136N4O33 | 1 | 1669.85020 | 1632.90869 | [M-2H+K]-  | 4.247 |
| C82H148N2O32 | 1 | 1671.98960 | 1673.00153 | [M-H]-     | 2.787 |
| C79H142N2O35 | 1 | 1677.92870 | 1678.93933 | [M-H]-     | 1.999 |
| C82H150N2O31 | 2 | 1679.99060 | 1659.02227 | [M-2H+Na]- | 3.765 |
| C80H146N2O33 | 1 | 1683.96330 | 1662.98080 | [M-2H+Na]- | 4.659 |
| C78H141N3O33 | 1 | 1684.89250 | 1647.94474 | [M-2H+K]-  | 0.501 |
| C82H147N3O32 | 2 | 1684.99040 | 1685.99678 | [M-H]-     | 0.529 |
| C82H149N3O32 | 1 | 1687.00330 | 1688.01243 | [M-H]-     | 1.102 |
| C82H148N2O32 | 1 | 1693.97490 | 1673.00153 | [M-2H+Na]- | 0.762 |
| C77H137N3O37 | 1 | 1694.89050 | 1695.89310 | [M-H]-     | 2.753 |
| C78H138N4O34 | 1 | 1695.88690 | 1674.91926 | [M-2H+Na]- | 4.138 |
| C82H150N2O31 | 1 | 1695.96890 | 1659.02227 | [M-2H+K]-  | 1.159 |
| C82H150N2O32 | 1 | 1695.99480 | 1675.01718 | [M-2H+Na]- | 1.745 |
| C80H144N2O33 | 1 | 1697.92190 | 1660.96515 | [M-2H+K]-  | 4.803 |
| C78H141NO38  | 1 | 1698.90140 | 1699.91317 | [M-H]-     | 2.649 |
| C78H140N2O36 | 1 | 1701.88870 | 1680.91859 | [M-2H+Na]- | 2.673 |

|              |   |            |            |            |       |
|--------------|---|------------|------------|------------|-------|
| C82H149N3O33 | 3 | 1702.99520 | 1704.00734 | [M-H]-     | 2.862 |
| C79H141N3O36 | 1 | 1706.91520 | 1707.92949 | [M-H]-     | 4.112 |
| C78H140N2O38 | 1 | 1711.90690 | 1712.90842 | [M-H]-     | 3.359 |
| C82H150N2O32 | 1 | 1711.96120 | 1675.01718 | [M-2H+K]-  | 2.675 |
| C82H150N2O33 | 1 | 1711.98500 | 1691.01210 | [M-2H+Na]- | 1.025 |
| C84H151N3O32 | 1 | 1713.02780 | 1714.02808 | [M-H]-     | 4.081 |
| C84H153N3O32 | 1 | 1715.04120 | 1716.04373 | [M-H]-     | 2.764 |
| C81H145N3O35 | 1 | 1718.95240 | 1719.96587 | [M-H]-     | 3.609 |
| C79H140N4O36 | 1 | 1719.91100 | 1720.92474 | [M-H]-     | 3.760 |
| C78H141NO38  | 1 | 1720.89620 | 1699.91317 | [M-2H+Na]- | 4.863 |
| C80H144N2O37 | 1 | 1723.94180 | 1724.94481 | [M-H]-     | 2.474 |
| C82H149N3O33 | 1 | 1724.97480 | 1704.00734 | [M-2H+Na]- | 4.176 |
| C80H144N4O33 | 1 | 1725.91500 | 1688.97129 | [M-2H+K]-  | 2.834 |
| C84H153N3O33 | 1 | 1731.03830 | 1732.03864 | [M-H]-     | 4.001 |
| C83H148N2O35 | 1 | 1731.97790 | 1732.98628 | [M-H]-     | 0.638 |
| C78H140N2O37 | 1 | 1733.86300 | 1696.91351 | [M-2H+K]-  | 0.516 |
| C81H145N3O36 | 2 | 1734.94500 | 1735.96079 | [M-H]-     | 4.910 |
| C79H140N4O37 | 1 | 1735.90970 | 1736.91965 | [M-H]-     | 1.545 |
| C82H148N2O36 | 1 | 1735.98180 | 1736.98119 | [M-H]-     | 4.539 |
| C78H141NO38  | 2 | 1736.85970 | 1699.91317 | [M-2H+K]-  | 1.192 |
| C80H143N3O37 | 1 | 1736.92900 | 1737.94005 | [M-H]-     | 2.179 |
| C82H148N4O33 | 1 | 1737.97450 | 1717.00259 | [M-2H+Na]- | 1.584 |
| C82H147N3O33 | 1 | 1738.93250 | 1701.99169 | [M-2H+K]-  | 4.482 |
| C80H142N4O34 | 1 | 1739.90210 | 1702.95056 | [M-2H+K]-  | 1.691 |
| C84H150N4O33 | 1 | 1742.00720 | 1743.01824 | [M-H]-     | 2.166 |
| C84H152N4O33 | 1 | 1744.01870 | 1745.03389 | [M-H]-     | 4.543 |
| C83H149N3O35 | 1 | 1746.98730 | 1747.99717 | [M-H]-     | 1.491 |
| C81H144N4O36 | 1 | 1747.95030 | 1748.95604 | [M-H]-     | 0.876 |
| C80H145NO38  | 1 | 1748.92600 | 1727.94447 | [M-2H+Na]- | 3.928 |
| C84H151N3O32 | 2 | 1750.96880 | 1714.02808 | [M-2H+K]-  | 4.500 |
| C82H146N4O34 | 1 | 1751.95380 | 1730.98186 | [M-2H+Na]- | 1.551 |
| C84H153N3O33 | 1 | 1753.00800 | 1732.03864 | [M-2H+Na]- | 3.026 |
| C83H148N2O35 | 1 | 1753.96580 | 1732.98628 | [M-2H+Na]- | 2.774 |
| C82H149NO38  | 1 | 1754.96770 | 1755.97577 | [M-H]-     | 0.457 |
| C79H138N4O37 | 1 | 1755.88530 | 1734.90400 | [M-2H+Na]- | 3.780 |
| C83H150N2O35 | 2 | 1755.96880 | 1735.00193 | [M-2H+Na]- | 4.433 |
| C84H148N4O34 | 1 | 1755.98460 | 1756.99751 | [M-H]-     | 3.211 |
| C81H145N3O36 | 1 | 1756.93630 | 1735.96079 | [M-2H+Na]- | 0.484 |
| C79H140N4O37 | 3 | 1757.89350 | 1736.91965 | [M-2H+Na]- | 0.462 |
| C84H150N4O34 | 2 | 1758.00100 | 1759.01316 | [M-H]-     | 2.780 |
| C80H143N3O36 | 1 | 1758.88570 | 1721.94514 | [M-2H+K]-  | 4.570 |
| C80H143N3O37 | 1 | 1758.90810 | 1737.94005 | [M-2H+Na]- | 3.760 |
| C80H144N2O37 | 1 | 1761.90120 | 1724.94481 | [M-2H+K]-  | 4.424 |
| C81H142N4O37 | 1 | 1761.92080 | 1762.93530 | [M-H]-     | 4.105 |
| C80H144N2O38 | 1 | 1761.92080 | 1740.93972 | [M-2H+Na]- | 3.644 |
| C83H149N3O36 | 1 | 1762.97810 | 1763.99209 | [M-H]-     | 3.811 |
| C78H138N2O39 | 1 | 1763.83690 | 1726.88769 | [M-2H+K]-  | 0.349 |
| C84H152N2O36 | 1 | 1764.01010 | 1765.01249 | [M-H]-     | 2.766 |
| C80H145NO38  | 1 | 1764.89480 | 1727.94447 | [M-2H+K]-  | 0.980 |
| C84H152N4O33 | 1 | 1766.00430 | 1745.03389 | [M-2H+Na]- | 2.408 |
| C82H146N4O34 | 1 | 1767.93550 | 1730.98186 | [M-2H+K]-  | 2.852 |
| C98H195O21PS | 1 | 1770.35260 | 1771.36493 | [M-H]-     | 2.858 |
| C83H150N2O35 | 2 | 1771.94490 | 1735.00193 | [M-2H+K]-  | 3.174 |

|                |   |            |            |            |       |
|----------------|---|------------|------------|------------|-------|
| C81H145N3O36   | 2 | 1772.90140 | 1735.96079 | [M-2H+K]-  | 4.506 |
| C85H151N3O35   | 1 | 1773.01360 | 1774.01282 | [M-H]-     | 4.538 |
| C79H140N4O37   | 1 | 1773.87230 | 1736.91965 | [M-2H+K]-  | 2.282 |
| C82H148N2O36   | 1 | 1773.93210 | 1736.98119 | [M-2H+K]-  | 1.302 |
| C80H143N3O38   | 2 | 1774.90190 | 1753.93497 | [M-2H+Na]- | 4.355 |
| C85H153N3O35   | 1 | 1775.02410 | 1776.02847 | [M-H]-     | 1.632 |
| C84H151N3O36   | 1 | 1776.99160 | 1778.00774 | [M-H]-     | 4.991 |
| C80H144N2O38   | 1 | 1777.89020 | 1740.93972 | [M-2H+K]-  | 1.057 |
| C83H149N3O37   | 1 | 1778.97640 | 1779.98700 | [M-H]-     | 1.874 |
| C82H147N3O38   | 1 | 1780.95820 | 1781.96627 | [M-H]-     | 0.449 |
| C84H151NO38    | 1 | 1780.98650 | 1781.99142 | [M-H]-     | 1.318 |
| C85H154N2O35   | 1 | 1784.01580 | 1763.03323 | [M-2H+Na]- | 4.437 |
| C86H152N4O34   | 2 | 1784.01580 | 1785.02881 | [M-H]-     | 3.216 |
| C83H149N3O35   | 2 | 1784.94390 | 1747.99717 | [M-2H+K]-  | 1.050 |
| C81H144N4O36   | 1 | 1785.90880 | 1748.95604 | [M-2H+K]-  | 2.330 |
| C80H141N3O39   | 1 | 1788.89280 | 1767.91423 | [M-2H+Na]- | 2.183 |
| C82H148N2O38   | 1 | 1789.93860 | 1768.97102 | [M-2H+Na]- | 3.955 |
| C86H154N2O36   | 1 | 1790.01590 | 1791.02814 | [M-H]-     | 2.777 |
| C80H143N3O38   | 2 | 1790.88640 | 1753.93497 | [M-2H+K]-  | 1.581 |
| C80H142N2O39   | 1 | 1791.87180 | 1754.91899 | [M-2H+K]-  | 2.352 |
| C82H144N4O38   | 1 | 1791.94350 | 1792.94587 | [M-H]-     | 2.736 |
| C86H154N4O33   | 2 | 1792.03080 | 1771.04954 | [M-2H+Na]- | 3.681 |
| C86H156N2O36   | 2 | 1792.03080 | 1793.04379 | [M-H]-     | 3.192 |
| C85H151N3O35   | 1 | 1794.99400 | 1774.01282 | [M-2H+Na]- | 3.630 |
| C84H150N4O34   | 1 | 1795.96560 | 1759.01316 | [M-2H+K]-  | 2.139 |
| C81H142N4O37   | 1 | 1799.87570 | 1762.93530 | [M-2H+K]-  | 4.557 |
| C85H154N2O35   | 1 | 1799.98780 | 1763.03323 | [M-2H+K]-  | 3.319 |
| C82H147N3O37   | 1 | 1802.91220 | 1765.97135 | [M-2H+K]-  | 4.301 |
| C82H146N2O39   | 1 | 1803.91840 | 1782.95029 | [M-2H+Na]- | 3.628 |
| C85H152N4O36   | 1 | 1804.01030 | 1805.01864 | [M-H]-     | 0.592 |
| C86H155N3O36   | 1 | 1805.02940 | 1806.03904 | [M-H]-     | 1.312 |
| C85H153N3O37   | 1 | 1807.00250 | 1808.01830 | [M-H]-     | 4.723 |
| C86H154N4O33   | 1 | 1808.00070 | 1771.04954 | [M-2H+K]-  | 1.414 |
| C96H182N2O24P2 | 1 | 1808.24490 | 1809.25579 | [M-H]-     | 2.000 |
| C84H150N2O39   | 1 | 1809.96550 | 1810.98159 | [M-H]-     | 4.870 |
| C86H157NO38    | 1 | 1811.02810 | 1812.03837 | [M-H]-     | 1.658 |
| C83H146N4O37   | 1 | 1811.93230 | 1790.96660 | [M-2H+Na]- | 4.947 |
| C85H153N3O35   | 1 | 1812.98210 | 1776.02847 | [M-2H+K]-  | 2.772 |
| C85H153N3O36   | 1 | 1812.99620 | 1792.02339 | [M-2H+Na]- | 1.020 |
| C83H148N4O36   | 1 | 1813.93800 | 1776.98734 | [M-2H+K]-  | 1.137 |
| C83H148N4O37   | 1 | 1813.95330 | 1792.98225 | [M-2H+Na]- | 1.992 |
| C86H156N2O36   | 1 | 1814.02200 | 1793.04379 | [M-2H+Na]- | 1.957 |
| C87H155N3O36   | 1 | 1817.03740 | 1818.03904 | [M-H]-     | 3.099 |
| C84H152N2O37   | 1 | 1817.96190 | 1781.00741 | [M-2H+K]-  | 3.243 |
| C84H151NO38    | 1 | 1818.93910 | 1781.99142 | [M-2H+K]-  | 0.507 |
| C87H157N3O36   | 1 | 1819.05070 | 1820.05469 | [M-H]-     | 1.804 |
| C84H148N4O38   | 1 | 1819.97450 | 1820.97717 | [M-H]-     | 2.529 |
| C84H153NO38    | 1 | 1820.96050 | 1784.00707 | [M-2H+K]-  | 2.651 |
| C86H155N3O37   | 1 | 1821.02600 | 1822.03395 | [M-H]-     | 0.376 |
| C87H155N3O35   | 1 | 1823.02500 | 1802.04412 | [M-2H+Na]- | 3.410 |
| C83H147N3O40   | 1 | 1824.95260 | 1825.95610 | [M-H]-     | 2.066 |
| C85H151N3O36   | 1 | 1826.96130 | 1790.00774 | [M-2H+K]-  | 2.715 |
| C86H155N3O36   | 1 | 1827.02160 | 1806.03904 | [M-2H+Na]- | 4.325 |



|                |   |            |            |            |       |
|----------------|---|------------|------------|------------|-------|
| C82H144N4O39   | 1 | 1829.92130 | 1808.94078 | [M-2H+Na]- | 3.201 |
| C88H157N3O36   | 1 | 1831.05540 | 1832.05469 | [M-H]-     | 4.359 |
| C87H156N4O36   | 1 | 1832.03650 | 1833.04994 | [M-H]-     | 3.367 |
| C82H147NO43    | 1 | 1832.92600 | 1833.93470 | [M-H]-     | 0.779 |
| C84H152N2O38   | 1 | 1833.95040 | 1797.00232 | [M-2H+K]-  | 0.284 |
| C88H158N2O37   | 1 | 1834.05070 | 1835.05436 | [M-H]-     | 1.971 |
| C88H160N2O37   | 1 | 1836.06550 | 1837.07001 | [M-H]-     | 1.506 |
| C86H154N2O39   | 1 | 1838.00860 | 1839.01289 | [M-H]-     | 1.624 |
| C87H157N3O35   | 1 | 1841.01670 | 1804.05977 | [M-2H+K]-  | 4.523 |
| C88H160N2O36   | 1 | 1842.05020 | 1821.07509 | [M-2H+Na]- | 0.244 |
| C86H155N3O37   | 1 | 1843.01770 | 1822.03395 | [M-2H+Na]- | 4.930 |
| C84H150N4O38   | 1 | 1843.95880 | 1822.99282 | [M-2H+Na]- | 4.706 |
| C84H154N2O37P2 | 1 | 1843.95880 | 1844.97058 | [M-H]-     | 2.446 |
| C87H152N4O37   | 1 | 1844.01410 | 1845.01355 | [M-H]-     | 4.239 |
| C82H144N4O40   | 1 | 1845.90920 | 1824.93570 | [M-2H+Na]- | 0.627 |
| C87H154N4O37   | 1 | 1846.01300 | 1847.02920 | [M-H]-     | 4.839 |
| C86H156N2O38   | 1 | 1846.01300 | 1825.03362 | [M-2H+Na]- | 2.557 |
| C84H151N3O38   | 1 | 1846.95070 | 1809.99757 | [M-2H+K]-  | 2.453 |
| C87H156N4O37   | 1 | 1848.04210 | 1849.04485 | [M-H]-     | 2.444 |
| C86H157NO38    | 3 | 1848.98400 | 1812.03837 | [M-2H+K]-  | 1.607 |
| C88H159N3O37   | 2 | 1849.06140 | 1850.06525 | [M-H]-     | 1.847 |
| C87H154N4O36   | 1 | 1852.00170 | 1831.03429 | [M-2H+Na]- | 3.914 |
| C88H157N3O36   | 1 | 1853.02830 | 1832.05469 | [M-2H+Na]- | 0.566 |
| C87H156N4O36   | 1 | 1854.03310 | 1833.04994 | [M-2H+Na]- | 4.586 |
| C87H155N3O36   | 2 | 1854.98400 | 1818.03904 | [M-2H+K]-  | 1.962 |
| C88H159N3O36   | 1 | 1855.04380 | 1834.07034 | [M-2H+Na]- | 0.646 |
| C85H150N4O37   | 1 | 1855.94230 | 1818.99790 | [M-2H+K]-  | 2.265 |
| C88H158N2O36   | 1 | 1856.01000 | 1819.05944 | [M-2H+K]-  | 1.056 |
| C87H157N3O37   | 1 | 1857.01930 | 1836.04960 | [M-2H+Na]- | 2.673 |
| C84H148N4O38   | 1 | 1857.92540 | 1820.97717 | [M-2H+K]-  | 0.198 |
| C88H160N2O37   | 1 | 1858.03670 | 1837.07001 | [M-2H+Na]- | 4.287 |
| C86H155N3O37   | 1 | 1858.97420 | 1822.03395 | [M-2H+K]-  | 4.494 |
| C86H155N3O38   | 2 | 1859.00820 | 1838.02887 | [M-2H+Na]- | 2.513 |
| C86H154N2O38   | 1 | 1859.97040 | 1823.01797 | [M-2H+K]-  | 2.059 |
| C86H154N2O39   | 1 | 1859.98830 | 1839.01289 | [M-2H+Na]- | 0.406 |
| C87H152N4O38   | 1 | 1859.99710 | 1861.00847 | [M-H]-     | 2.203 |
| C89H160N4O36   | 1 | 1860.07680 | 1861.08124 | [M-H]-     | 1.523 |
| C84H151NO43    | 1 | 1860.95440 | 1861.96600 | [M-H]-     | 2.325 |
| C90H163N3O36   | 1 | 1861.08720 | 1862.10164 | [M-H]-     | 3.852 |
| C82H144N4O40   | 1 | 1861.87750 | 1824.93570 | [M-2H+K]-  | 3.651 |
| C83H147N3O40   | 1 | 1862.89940 | 1825.95610 | [M-2H+K]-  | 2.844 |
| C84H154N2O37P2 | 1 | 1865.94590 | 1844.97058 | [M-2H+Na]- | 0.354 |
| C88H158N2O39   | 1 | 1866.03270 | 1867.04419 | [M-H]-     | 2.259 |
| C87H154N4O36   | 1 | 1867.97590 | 1831.03429 | [M-2H+K]-  | 3.741 |
| C86H152N4O38   | 1 | 1869.97620 | 1849.00847 | [M-2H+Na]- | 3.705 |
| C82H147NO43    | 2 | 1870.87640 | 1833.93470 | [M-2H+K]-  | 3.686 |
| C88H159N3O37   | 2 | 1871.03200 | 1850.06525 | [M-2H+Na]- | 4.230 |
| C86H154N4O38   | 1 | 1871.99110 | 1851.02412 | [M-2H+Na]- | 4.101 |
| C86H153N3O39   | 2 | 1872.98230 | 1852.00813 | [M-2H+Na]- | 0.264 |
| C87H157N3O37   | 1 | 1872.99110 | 1836.04960 | [M-2H+K]-  | 3.793 |
| C84H148N4O39   | 1 | 1873.92590 | 1836.97208 | [M-2H+K]-  | 2.784 |
| C89H158N4O37   | 1 | 1874.05680 | 1875.06050 | [M-H]-     | 1.903 |
| C90H161N3O37   | 1 | 1875.07010 | 1876.08090 | [M-H]-     | 1.885 |

|              |   |            |            |            |       |
|--------------|---|------------|------------|------------|-------|
| C88H156N4O38 | 1 | 1876.04050 | 1877.03977 | [M-H]-     | 4.265 |
| C89H160N4O37 | 2 | 1876.06320 | 1877.07615 | [M-H]-     | 3.029 |
| C90H163N3O37 | 1 | 1877.08160 | 1878.09655 | [M-H]-     | 4.094 |
| C88H157N3O39 | 1 | 1879.03110 | 1880.03943 | [M-H]-     | 0.566 |
| C90H161N3O36 | 1 | 1881.06050 | 1860.08599 | [M-2H+Na]- | 0.079 |
| C87H152N4O37 | 2 | 1881.95850 | 1845.01355 | [M-2H+K]-  | 1.941 |
| C85H150N4O41 | 1 | 1881.96530 | 1882.97756 | [M-H]-     | 2.653 |
| C89H160N4O36 | 1 | 1882.05720 | 1861.08124 | [M-2H+Na]- | 0.692 |
| C86H153N3O41 | 1 | 1882.99630 | 1883.99796 | [M-H]-     | 2.977 |
| C88H157N3O38 | 1 | 1885.02830 | 1864.04452 | [M-2H+Na]- | 4.839 |
| C89H154N4O38 | 1 | 1886.02210 | 1887.02412 | [M-H]-     | 2.785 |
| C85H150N4O40 | 2 | 1887.95680 | 1866.98265 | [M-2H+Na]- | 0.269 |
| C86H154N4O38 | 2 | 1887.96600 | 1851.02412 | [M-2H+K]-  | 3.558 |
| C89H156N4O38 | 2 | 1888.03350 | 1889.03977 | [M-H]-     | 0.531 |
| C86H153N3O39 | 1 | 1888.96310 | 1852.00813 | [M-2H+K]-  | 3.370 |
| C86H155N4O43 | 1 | 1888.99930 | 1889.99730 | [M-H]-     | 4.909 |
| C85H151N3O40 | 1 | 1890.93190 | 1853.98740 | [M-2H+K]-  | 2.168 |
| C88H156N4O39 | 1 | 1892.02100 | 1893.03468 | [M-H]-     | 3.389 |
| C90H161N3O36 | 1 | 1897.04160 | 1860.08599 | [M-2H+K]-  | 3.696 |
| C85H150N4O42 | 1 | 1897.97430 | 1898.97248 | [M-H]-     | 4.790 |
| C90H163N3O36 | 1 | 1899.05590 | 1862.10164 | [M-2H+K]-  | 2.981 |
| C90H163N3O37 | 1 | 1899.07460 | 1878.09655 | [M-2H+Na]- | 1.783 |
| C88H157N3O38 | 1 | 1901.00070 | 1864.04452 | [M-2H+K]-  | 3.988 |
| C86H152N4O39 | 1 | 1901.94530 | 1865.00338 | [M-2H+K]-  | 3.514 |
| C87H155N3O40 | 1 | 1902.99060 | 1882.01870 | [M-2H+Na]- | 1.450 |
| C88H159N3O38 | 1 | 1903.00590 | 1866.06017 | [M-2H+K]-  | 1.508 |
| C90H160N4O38 | 1 | 1904.06790 | 1905.07107 | [M-H]-     | 2.154 |
| C86H153N3O41 | 1 | 1904.97630 | 1883.99796 | [M-2H+Na]- | 1.930 |
| C90H162N4O38 | 1 | 1906.08330 | 1907.08672 | [M-H]-     | 2.021 |
| C90H161N3O39 | 1 | 1907.06410 | 1908.07073 | [M-H]-     | 0.333 |
| C89H156N4O37 | 1 | 1910.00080 | 1873.04485 | [M-2H+K]-  | 3.847 |
| C87H154N4O41 | 3 | 1910.00080 | 1911.00886 | [M-H]-     | 0.415 |
| C89H156N4O38 | 1 | 1910.00720 | 1889.03977 | [M-2H+Na]- | 3.784 |
| C90H161N3O37 | 2 | 1913.02490 | 1876.08090 | [M-2H+K]-  | 2.407 |
| C88H156N4O38 | 1 | 1913.98990 | 1877.03977 | [M-2H+K]-  | 0.800 |
| C88H156N4O39 | 1 | 1914.00510 | 1893.03468 | [M-2H+Na]- | 2.217 |
| C91H158N4O38 | 1 | 1914.05410 | 1915.05542 | [M-H]-     | 3.110 |
| C86H150N4O40 | 1 | 1915.94040 | 1878.98265 | [M-2H+K]-  | 4.777 |
| C87H154N4O40 | 1 | 1915.98990 | 1895.01395 | [M-2H+Na]- | 0.674 |
| C91H160N4O38 | 1 | 1916.07140 | 1917.07107 | [M-H]-     | 3.968 |
| C88H159N4O43 | 1 | 1917.01390 | 1918.02860 | [M-H]-     | 3.874 |
| C86H152N4O40 | 2 | 1917.94110 | 1880.99830 | [M-2H+K]-  | 3.023 |
| C86H152N4O41 | 1 | 1917.97690 | 1896.99321 | [M-2H+Na]- | 4.707 |
| C85H150N4O41 | 1 | 1919.92610 | 1882.97756 | [M-2H+K]-  | 0.033 |
| C89H154N4O38 | 1 | 1923.96460 | 1887.02412 | [M-2H+K]-  | 4.219 |
| C86H154N2O43 | 1 | 1923.96460 | 1902.99255 | [M-2H+Na]- | 1.354 |
| C88H158N2O43 | 1 | 1930.01880 | 1931.02385 | [M-H]-     | 1.153 |
| C90H163N3O38 | 1 | 1931.04360 | 1894.09147 | [M-2H+K]-  | 1.829 |
| C87H154N4O41 | 1 | 1931.99290 | 1911.00886 | [M-2H+Na]- | 4.854 |
| C88H157N3O41 | 1 | 1932.99910 | 1912.02926 | [M-2H+Na]- | 2.496 |
| C86H152N4O41 | 1 | 1933.93800 | 1896.99321 | [M-2H+K]-  | 1.972 |
| C90H158N4O40 | 2 | 1934.02860 | 1935.04525 | [M-H]-     | 4.849 |
| C91H161N3O40 | 1 | 1935.05960 | 1936.06565 | [M-H]-     | 0.631 |

|                |   |            |            |            |       |
|----------------|---|------------|------------|------------|-------|
| C91H160N4O38   | 1 | 1938.04780 | 1917.07107 | [M-2H+Na]- | 1.069 |
| C90H158N4O38   | 1 | 1940.00150 | 1903.05542 | [M-2H+K]-  | 1.298 |
| C90H158N4O39   | 1 | 1940.03450 | 1919.05033 | [M-2H+Na]- | 4.900 |
| C95H156N8O28P2 | 1 | 1940.03450 | 1919.05044 | [M-2H+Na]- | 4.847 |
| C90H160N4O38   | 1 | 1942.01770 | 1905.07107 | [M-2H+K]-  | 1.013 |
| C90H162N4O38   | 1 | 1944.03150 | 1907.08672 | [M-2H+K]-  | 1.964 |
| C87H153N5O41   | 2 | 1944.98530 | 1924.00411 | [M-2H+Na]- | 3.357 |
| C87H154N4O41   | 1 | 1947.95790 | 1911.00886 | [M-2H+K]-  | 0.224 |
| C88H157N3O41   | 1 | 1948.98310 | 1912.02926 | [M-2H+K]-  | 2.687 |
| C92H162N4O38   | 1 | 1952.06080 | 1931.08672 | [M-2H+Na]- | 0.296 |
| C90H160N4O39   | 1 | 1958.01280 | 1921.06598 | [M-2H+K]-  | 0.911 |
| C87H153N5O41   | 1 | 1960.95370 | 1924.00411 | [M-2H+K]-  | 0.504 |
| C88H154N4O44   | 1 | 1969.98910 | 1970.99361 | [M-H]-     | 1.402 |
| C92H165NO43    | 1 | 1971.05880 | 1972.07555 | [M-H]-     | 4.808 |
| C91H163N3O40   | 1 | 1975.02840 | 1938.08130 | [M-2H+K]-  | 0.759 |
| C93H166N4O40   | 1 | 1978.09160 | 1979.10785 | [M-H]-     | 4.539 |
| C91H161N5O41   | 1 | 1979.05330 | 1980.06671 | [M-H]-     | 3.103 |
| C90H160N4O43   | 2 | 1984.03140 | 1985.04564 | [M-H]-     | 3.515 |
| C92H162N4O39   | 2 | 1984.03140 | 1947.08163 | [M-2H+K]-  | 0.588 |
| C92H166N2O43   | 1 | 1986.08150 | 1987.08645 | [M-H]-     | 1.170 |
| C89H157N5O41   | 1 | 1988.98550 | 1952.03541 | [M-2H+K]-  | 0.749 |
| C88H154N4O44   | 1 | 1991.96900 | 1970.99361 | [M-2H+Na]- | 0.367 |

Supplemental Table 2:  
DPB635 - total lipids detected

| Chemical Formula | No. of Batches detected in (of 6) | Ion Detected          | measured m/z | Neutral Mass | Error (ppm) |
|------------------|-----------------------------------|-----------------------|--------------|--------------|-------------|
| C4H8O4           | 4                                 | [M+K] <sup>+</sup>    | 159.00570    | 120.04225    | 1.887       |
| C6H7NO3          | 1                                 | [M+K] <sup>+</sup>    | 180.00580    | 141.04260    | 0.278       |
| C11H22O2         | 1                                 | [M+H] <sup>+</sup>    | 187.16950    | 186.16200    | 1.191       |
| C10H18O4         | 1                                 | [M-H] <sup>-</sup>    | 201.11270    | 202.12051    | 2.685       |
| C12H18O3         | 2                                 | [M-H] <sup>-</sup>    | 209.11760    | 210.12560    | 3.467       |
| C13H22O2         | 2                                 | [M-H] <sup>-</sup>    | 209.15400    | 210.16198    | 3.395       |
| C12H20O3         | 2                                 | [M-H] <sup>-</sup>    | 211.13320    | 212.14125    | 3.671       |
| C13H24O2         | 2                                 | [M-H] <sup>-</sup>    | 211.16960    | 212.17763    | 3.599       |
| C14H28O          | 2                                 | [M-H] <sup>-</sup>    | 211.20600    | 212.21402    | 3.527       |
| C12H22O3         | 2                                 | [M-H] <sup>-</sup>    | 213.14890    | 214.15690    | 3.401       |
| C13H26O2         | 2                                 | [M-H] <sup>-</sup>    | 213.18520    | 214.19328    | 3.799       |
| C11H20O4         | 2                                 | [M-H] <sup>-</sup>    | 215.12810    | 216.13616    | 3.672       |
| C10H12O3         | 1                                 | [M+K] <sup>+</sup>    | 219.04080    | 180.07865    | 4.543       |
| C13H18O3         | 2                                 | [M-H] <sup>-</sup>    | 221.11750    | 222.12560    | 3.731       |
| C14H22O2         | 2                                 | [M-H] <sup>-</sup>    | 221.15390    | 222.16198    | 3.663       |
| C10H16O3         | 1                                 | [M+K] <sup>+</sup>    | 223.07320    | 184.10995    | 0.471       |
| C13H20O3         | 2                                 | [M-H] <sup>-</sup>    | 223.13320    | 224.14125    | 3.473       |
| C14H24O2         | 1                                 | [M-H] <sup>-</sup>    | 223.17050    | 224.17763    | 0.627       |
| C15H28O          | 1                                 | [M-H] <sup>-</sup>    | 223.20690    | 224.21402    | 0.694       |
| C11H19ClO        | 1                                 | [M+Na] <sup>+</sup>   | 225.10110    | 202.11244    | 2.506       |
| C12H18O4         | 2                                 | [M-H] <sup>-</sup>    | 225.11240    | 226.12051    | 3.731       |
| C14H26O2         | 2                                 | [M-H] <sup>-</sup>    | 225.18520    | 226.19328    | 3.597       |
| C15H30O          | 2                                 | [M-H] <sup>-</sup>    | 225.22160    | 226.22967    | 3.534       |
| C11H16O5         | 2                                 | [M-H] <sup>-</sup>    | 227.09160    | 228.09978    | 3.985       |
| C12H20O4         | 2                                 | [M-H] <sup>-</sup>    | 227.12810    | 228.13616    | 3.478       |
| C13H24O3         | 2                                 | [M-H] <sup>-</sup>    | 227.16440    | 228.17255    | 3.852       |
| C14H28O2         | 3                                 | [M-H] <sup>-</sup>    | 227.20080    | 228.20893    | 3.785       |
| C15H18O2         | 1                                 | [M-H] <sup>-</sup>    | 229.12370    | 230.13068    | 1.266       |
| C12H22O4         | 3                                 | [M-H] <sup>-</sup>    | 229.14370    | 230.15181    | 3.666       |
| C15H20O2         | 1                                 | [M-H] <sup>-</sup>    | 231.13910    | 232.14633    | 0.173       |
| C10H10O4         | 4                                 | [M+K] <sup>+</sup>    | 233.02120    | 194.05790    | 0.644       |
| C14H18O3         | 2                                 | [M-H] <sup>-</sup>    | 233.11740    | 234.12560    | 3.968       |
| C15H22O2         | 2                                 | [M-H] <sup>-</sup>    | 233.15380    | 234.16198    | 3.903       |
| C15H24O2         | 2                                 | [M-H] <sup>-</sup>    | 235.17050    | 236.17763    | 0.595       |
| C12H25NO         | 1                                 | [M-2H+K] <sup>-</sup> | 236.14200    | 199.19361    | 0.906       |
| C14H22O3         | 4                                 | [M-H] <sup>-</sup>    | 237.14870    | 238.15690    | 3.900       |
| C13H26O          | 1                                 | [M+K] <sup>+</sup>    | 237.16130    | 198.19800    | 0.632       |
| C15H26O2         | 2                                 | [M-H] <sup>-</sup>    | 237.18610    | 238.19328    | 0.379       |
| C12H25NO2        | 3                                 | [M+Na] <sup>+</sup>   | 238.17660    | 215.18853    | 4.828       |
| C12H16O5         | 1                                 | [M-H] <sup>-</sup>    | 239.09260    | 240.09978    | 0.397       |
| C14H24O3         | 1                                 | [M-H] <sup>-</sup>    | 239.16530    | 240.17255    | 0.105       |
| C15H28O2         | 2                                 | [M-H] <sup>-</sup>    | 239.20080    | 240.20893    | 3.595       |
| C16H32O          | 2                                 | [M-H] <sup>-</sup>    | 239.23710    | 240.24532    | 3.954       |
| C16H18O2         | 2                                 | [M-H] <sup>-</sup>    | 241.12250    | 242.13068    | 3.774       |
| C14H26O3         | 2                                 | [M-H] <sup>-</sup>    | 241.18000    | 242.18820    | 3.835       |
| C15H30O2         | 2                                 | [M-H] <sup>-</sup>    | 241.21640    | 242.22458    | 3.777       |
| C16H20O2         | 2                                 | [M-H] <sup>-</sup>    | 243.13820    | 244.14633    | 3.537       |
| C13H24O4         | 2                                 | [M-H] <sup>-</sup>    | 243.15920    | 244.16746    | 4.071       |
| C14H28O3         | 1                                 | [M-H] <sup>-</sup>    | 243.19670    | 244.20385    | 0.510       |
| C15H18O3         | 2                                 | [M-H] <sup>-</sup>    | 245.11740    | 246.12560    | 3.774       |

|           |   |           |           |           |       |
|-----------|---|-----------|-----------|-----------|-------|
| C16H22O2  | 2 | [M-H]-    | 245.15490 | 246.16198 | 0.775 |
| C5H12O7P2 | 1 | [M+H]+    | 247.01220 | 246.00583 | 3.672 |
| C15H20O3  | 3 | [M-H]-    | 247.13300 | 248.14125 | 3.945 |
| C16H24O2  | 2 | [M-H]-    | 247.16940 | 248.17763 | 3.884 |
| C17H28O   | 2 | [M-H]-    | 247.20690 | 248.21402 | 0.627 |
| C15H22O3  | 1 | [M-H]-    | 249.14970 | 250.15690 | 0.301 |
| C16H26O2  | 2 | [M-H]-    | 249.18610 | 250.19328 | 0.361 |
| C17H30O   | 1 | [M-H]-    | 249.22260 | 250.22967 | 0.819 |
| C15H24O3  | 2 | [M-H]-    | 251.16430 | 252.17255 | 3.882 |
| C16H28O2  | 3 | [M-H]-    | 251.20070 | 252.20893 | 3.822 |
| C17H32O   | 2 | [M-H]-    | 251.23700 | 252.24532 | 4.163 |
| C13H18O5  | 2 | [M-H]-    | 253.10720 | 254.11543 | 3.773 |
| C15H18O2  | 1 | [M+Na]+   | 253.12090 | 230.13068 | 3.947 |
| C12H22O3  | 1 | [M+K]+    | 253.12090 | 214.15690 | 3.378 |
| C16H30O2  | 2 | [M-H]-    | 253.21630 | 254.22458 | 3.993 |
| C17H34O   | 1 | [M-H]-    | 253.25380 | 254.26097 | 0.411 |
| C15H28O3  | 2 | [M-H]-    | 255.19560 | 256.20385 | 3.825 |
| C16H32O2  | 1 | [M-H]-    | 255.23300 | 256.24023 | 0.153 |
| C17H22O2  | 1 | [M-H]-    | 257.15490 | 258.16198 | 0.739 |
| C14H26O4  | 2 | [M-H]-    | 257.17480 | 258.18311 | 4.044 |
| C15H30O3  | 1 | [M-H]-    | 257.21240 | 258.21950 | 0.676 |
| C16H32O2  | 1 | [M+H]+    | 257.24810 | 256.24023 | 2.301 |
| C13H25NO4 | 1 | [M-H]-    | 258.17120 | 259.17836 | 0.430 |
| C15H16O4  | 2 | [M-H]-    | 259.09650 | 260.10486 | 4.207 |
| C17H24O2  | 2 | [M-H]-    | 259.16930 | 260.17763 | 4.090 |
| C18H28O   | 4 | [M-H]-    | 259.20570 | 260.21402 | 4.032 |
| C15H18O4  | 1 | [M-H]-    | 261.11330 | 262.12051 | 0.230 |
| C16H22O3  | 2 | [M-H]-    | 261.14860 | 262.15690 | 3.925 |
| C17H26O2  | 2 | [M-H]-    | 261.18490 | 262.19328 | 4.250 |
| C18H30O   | 2 | [M-H]-    | 261.22260 | 262.22967 | 0.781 |
| C15H20O4  | 1 | [M-H]-    | 263.12910 | 264.13616 | 0.798 |
| C17H28O2  | 2 | [M-H]-    | 263.20060 | 264.20893 | 4.027 |
| C18H18O2  | 1 | [M-H]-    | 265.12350 | 266.13068 | 0.339 |
| C15H22O4  | 1 | [M-H]-    | 265.14470 | 266.15181 | 0.603 |
| C16H26O3  | 4 | [M-H]-    | 265.18000 | 266.18820 | 3.488 |
| C17H30O2  | 2 | [M-H]-    | 265.21630 | 266.22458 | 3.812 |
| C13H26O3  | 1 | [M-2H+K]- | 267.13800 | 230.18820 | 4.511 |
| C18H20O2  | 4 | [M-H]-    | 267.13800 | 268.14633 | 3.968 |
| C14H30O2  | 1 | [M-2H+K]- | 267.17440 | 230.22458 | 4.563 |
| C16H28O3  | 1 | [M-H]-    | 267.19680 | 268.20385 | 0.838 |
| C17H32O2  | 1 | [M-H]-    | 267.23310 | 268.24023 | 0.520 |
| C18H22O2  | 1 | [M-H]-    | 269.15490 | 270.16198 | 0.706 |
| C16H30O3  | 1 | [M-H]-    | 269.21240 | 270.21950 | 0.646 |
| C17H34O2  | 2 | [M-H]-    | 269.24870 | 270.25588 | 0.331 |
| C18H24O2  | 4 | [M-H]-    | 271.16920 | 272.17763 | 4.278 |
| C15H28O4  | 1 | [M-H]-    | 271.19160 | 272.19876 | 0.402 |
| C16H29FO2 | 1 | [M-H]-    | 271.20680 | 272.21516 | 4.015 |
| C19H28O   | 1 | [M-H]-    | 271.20680 | 272.21402 | 0.203 |
| C16H32O3  | 1 | [M-H]-    | 271.22800 | 272.23515 | 0.457 |
| C17H22O3  | 1 | [M-H]-    | 273.14980 | 274.15690 | 0.641 |
| C18H26O2  | 4 | [M-H]-    | 273.18490 | 274.19328 | 4.063 |
| C16H31FO2 | 2 | [M-H]-    | 273.22250 | 274.23081 | 3.803 |
| C19H30O   | 2 | [M-H]-    | 273.22250 | 274.22967 | 0.381 |

|            |   |            |           |           |       |
|------------|---|------------|-----------|-----------|-------|
| C17H24O3   | 1 | [M-H]-     | 275.16530 | 276.17255 | 0.091 |
| C18H28O2   | 2 | [M-H]-     | 275.20180 | 276.20893 | 0.509 |
| C16H22O4   | 1 | [M-H]-     | 277.14470 | 278.15181 | 0.577 |
| C17H26O3   | 1 | [M-H]-     | 277.18100 | 278.18820 | 0.271 |
| C18H30O2   | 2 | [M-H]-     | 277.21740 | 278.22458 | 0.321 |
| C18H31NO   | 1 | [M+H]+     | 278.24700 | 277.24056 | 3.022 |
| C18H16O3   | 1 | [M-H]-     | 279.10280 | 280.10995 | 0.448 |
| C15H20O5   | 1 | [M-H]-     | 279.12390 | 280.13108 | 0.340 |
| C17H28O3   | 1 | [M-H]-     | 279.19670 | 280.20385 | 0.444 |
| C18H32O2   | 2 | [M-H]-     | 279.23310 | 280.24023 | 0.498 |
| C19H36O    | 1 | [M-H]-     | 279.26940 | 280.27662 | 0.193 |
| C18H33NO   | 5 | [M+H]+     | 280.26380 | 279.25621 | 1.103 |
| C15H22O5   | 1 | [M-H]-     | 281.13960 | 282.14673 | 0.516 |
| C17H30O3   | 1 | [M-H]-     | 281.21230 | 282.21950 | 0.263 |
| C18H34O2   | 1 | [M-H]-     | 281.24860 | 282.25588 | 0.039 |
| C19H38O    | 2 | [M-H]-     | 281.28510 | 282.29227 | 0.370 |
| C18H35NO   | 5 | [M+H]+     | 282.27920 | 281.27186 | 0.209 |
| C18H20O3   | 1 | [M-H]-     | 283.13410 | 284.14125 | 0.441 |
| C14H28O4   | 1 | [M+Na]+    | 283.18680 | 260.19876 | 4.174 |
| C20H28O    | 2 | [M-H]-     | 283.20690 | 284.21402 | 0.547 |
| C17H32O3   | 1 | [M-H]-     | 283.22800 | 284.23515 | 0.438 |
| C18H36O2   | 1 | [M-H]-     | 283.26430 | 284.27153 | 0.138 |
| C16H14O5   | 1 | [M-H]-     | 285.07690 | 286.08413 | 0.158 |
| C18H22O3   | 1 | [M-H]-     | 285.14960 | 286.15690 | 0.088 |
| C19H26O2   | 2 | [M-H]-     | 285.18600 | 286.19328 | 0.035 |
| C16H30O4   | 1 | [M-H]-     | 285.20720 | 286.21441 | 0.207 |
| C17H34O3   | 1 | [M-H]-     | 285.24360 | 286.25080 | 0.259 |
| C18H22O3   | 1 | [M+H]+     | 287.16490 | 286.15690 | 2.535 |
| C18H24O3   | 2 | [M-H]-     | 287.16530 | 288.17255 | 0.087 |
| C19H28O2   | 1 | [M-H]-     | 287.20160 | 288.20893 | 0.209 |
| C16H32O4   | 1 | [M-H]-     | 287.22270 | 288.23006 | 0.317 |
| C17H34O3   | 1 | [M+H]+     | 287.25860 | 286.25080 | 1.835 |
| C10H19BrO2 | 1 | [M+K]+     | 289.02040 | 250.05684 | 1.419 |
| C17H22O4   | 1 | [M-H]-     | 289.14450 | 290.15181 | 0.138 |
| C18H26O3   | 1 | [M-H]-     | 289.18090 | 290.18820 | 0.086 |
| C19H30O2   | 2 | [M-H]-     | 289.21730 | 290.22458 | 0.038 |
| C18H28O3   | 1 | [M-H]-     | 291.19660 | 292.20385 | 0.082 |
| C19H32O2   | 2 | [M-H]-     | 291.23310 | 292.24023 | 0.477 |
| C18H30O3   | 1 | [M-H]-     | 293.21220 | 294.21950 | 0.089 |
| C19H34O2   | 1 | [M-H]-     | 293.24870 | 294.25588 | 0.303 |
| C16H31O5   | 1 | [M+Na]+    | 294.19850 | 271.20960 | 1.091 |
| C19H31N    | 2 | [M-2H+Na]- | 294.21990 | 273.24565 | 1.390 |
| C18H33NO2  | 2 | [M-H]-     | 294.24380 | 295.25113 | 0.201 |
| C16H24O5   | 1 | [M-H]-     | 295.15510 | 296.16238 | 0.017 |
| C20H24O2   | 3 | [M-H]-     | 295.17030 | 296.17763 | 0.203 |
| C17H28O4   | 1 | [M-H]-     | 295.19150 | 296.19876 | 0.030 |
| C21H28O    | 1 | [M-H]-     | 295.20680 | 296.21402 | 0.186 |
| C18H32O3   | 1 | [M-H]-     | 295.22760 | 296.23515 | 0.935 |
| C19H36O2   | 2 | [M-H]-     | 295.26410 | 296.27153 | 0.545 |
| C18H29N    | 1 | [M-2H+K]-  | 296.17820 | 259.23000 | 1.347 |
| C16H26O5   | 1 | [M-H]-     | 297.17070 | 298.17803 | 0.185 |
| C20H26O2   | 2 | [M-H]-     | 297.18590 | 298.19328 | 0.370 |
| C17H30O4   | 1 | [M-H]-     | 297.20710 | 298.21441 | 0.138 |

|            |   |            |           |           |       |
|------------|---|------------|-----------|-----------|-------|
| C18H34O3   | 1 | [M-H]-     | 297.24340 | 298.25080 | 0.424 |
| C19H36O2   | 1 | [M+H]+     | 297.27900 | 296.27153 | 0.646 |
| C19H38O2   | 2 | [M-H]-     | 297.27990 | 298.28718 | 0.037 |
| C18H31NO   | 5 | [M-2H+Na]- | 298.21460 | 277.24056 | 2.092 |
| C19H24O3   | 1 | [M-H]-     | 299.16540 | 300.17255 | 0.418 |
| C16H28O5   | 1 | [M-H]-     | 299.18650 | 300.19368 | 0.314 |
| C20H28O2   | 3 | [M-H]-     | 299.20160 | 300.20893 | 0.201 |
| C17H32O4   | 1 | [M-H]-     | 299.22260 | 300.23006 | 0.638 |
| C18H33FO2  | 1 | [M-H]-     | 299.23780 | 300.24646 | 4.642 |
| C21H32O    | 1 | [M-H]-     | 299.23780 | 300.24532 | 0.822 |
| C18H36O3   | 1 | [M-H]-     | 299.25900 | 300.26645 | 0.588 |
| C20H42O    | 1 | [M+H]+     | 299.33080 | 298.32357 | 0.144 |
| C18H33NO   | 2 | [M-2H+Na]- | 300.23060 | 279.25621 | 0.913 |
| C18H22O4   | 1 | [M-H]-     | 301.14450 | 302.15181 | 0.133 |
| C19H26O3   | 2 | [M-H]-     | 301.18090 | 302.18820 | 0.083 |
| C16H30O5   | 1 | [M-H]-     | 301.20210 | 302.20933 | 0.146 |
| C20H30O2   | 3 | [M-H]-     | 301.21720 | 302.22458 | 0.369 |
| C18H35FO2  | 2 | [M-H]-     | 301.25360 | 302.26211 | 4.113 |
| C21H34O    | 1 | [M-H]-     | 301.25360 | 302.26097 | 0.319 |
| C16H27NO2  | 1 | [M-2H+K]-  | 302.15230 | 265.20418 | 1.585 |
| C18H39NO2  | 1 | [M+H]+     | 302.30450 | 301.29808 | 2.832 |
| C19H28O3   | 1 | [M-H]-     | 303.19650 | 304.20385 | 0.251 |
| C20H32O2   | 3 | [M-H]-     | 303.23290 | 304.24023 | 0.201 |
| C15H22O5   | 1 | [M+Na]+    | 305.13600 | 282.14673 | 0.177 |
| C17H22O5   | 1 | [M-H]-     | 305.13940 | 306.14673 | 0.180 |
| C19H30O3   | 1 | [M-H]-     | 305.21210 | 306.21950 | 0.413 |
| C20H34O2   | 2 | [M-H]-     | 305.24860 | 306.25588 | 0.036 |
| C16H29O5   | 1 | [M-2H+K]-  | 306.14290 | 269.19390 | 1.307 |
| C16H29O2S  | 1 | [M-2H+Na]- | 306.16220 | 285.18850 | 3.136 |
| C19H32O3   | 1 | [M-H]-     | 307.22780 | 308.23515 | 0.247 |
| C20H36O2   | 2 | [M-H]-     | 307.26430 | 308.27153 | 0.127 |
| C16H31O5   | 1 | [M-2H+K]-  | 308.15850 | 271.20950 | 1.298 |
| C16H33NO2  | 2 | [M-2H+K]-  | 308.19930 | 271.25113 | 1.392 |
| C17H26O5   | 2 | [M-H]-     | 309.17090 | 310.17803 | 0.469 |
| C20H32     | 1 | [M-2H+K]-  | 309.19900 | 272.25040 | 0.003 |
| C18H30O4   | 1 | [M-H]-     | 309.20720 | 310.21441 | 0.191 |
| C22H30O    | 2 | [M-H]-     | 309.22240 | 310.22967 | 0.013 |
| C20H38O2   | 2 | [M-H]-     | 309.27970 | 310.28718 | 0.682 |
| C16H33NO2  | 1 | [M+K]+     | 310.21490 | 271.25113 | 2.002 |
| C16H35NO2  | 1 | [M-2H+K]-  | 310.21490 | 273.26678 | 1.544 |
| C21H28O2   | 1 | [M-H]-     | 311.20160 | 312.20893 | 0.193 |
| C18H32O4   | 1 | [M-H]-     | 311.22270 | 312.23006 | 0.292 |
| C19H36O3   | 1 | [M-H]-     | 311.25910 | 312.26645 | 0.244 |
| C20H40O2   | 2 | [M-H]-     | 311.29550 | 312.30283 | 0.196 |
| C19H22O4   | 1 | [M-H]-     | 313.14450 | 314.15181 | 0.128 |
| C16H33ClO  | 1 | [M-2H+K]-  | 313.17130 | 276.22199 | 2.254 |
| C20H26O3   | 1 | [M-H]-     | 313.18070 | 314.18820 | 0.718 |
| C19H32O    | 6 | [M-2H+K]-  | 313.19280 | 276.24532 | 3.563 |
| C16H30F2O2 | 3 | [M-2H+Na]- | 313.19460 | 292.22139 | 4.623 |
| C21H30O2   | 2 | [M-H]-     | 313.21720 | 314.22458 | 0.354 |
| C20H36     | 1 | [M-2H+K]-  | 313.22960 | 276.28170 | 2.238 |
| C18H34O4   | 1 | [M-H]-     | 313.23840 | 314.24571 | 0.131 |
| C19H36O3   | 6 | [M+H]+     | 313.27420 | 312.26645 | 1.523 |

|            |   |            |           |           |       |
|------------|---|------------|-----------|-----------|-------|
| C19H38O3   | 1 | [M-H]-     | 313.27470 | 314.28210 | 0.402 |
| C20H43NO   | 1 | [M+H]+     | 314.34200 | 313.33446 | 0.824 |
| C12H23BrO2 | 1 | [M-2H+K]-  | 315.03820 | 278.08814 | 4.634 |
| C19H22O4   | 1 | [M+H]+     | 315.15850 | 314.15181 | 1.863 |
| C19H24O4   | 2 | [M-H]-     | 315.16020 | 316.16746 | 0.032 |
| C20H28O3   | 3 | [M-H]-     | 315.19640 | 316.20385 | 0.558 |
| C21H32O2   | 2 | [M-H]-     | 315.23290 | 316.24023 | 0.194 |
| C18H36O4   | 1 | [M-H]-     | 315.25400 | 316.26136 | 0.289 |
| C20H30O3   | 3 | [M-H]-     | 317.21220 | 318.21950 | 0.082 |
| C21H34O2   | 1 | [M-H]-     | 317.24860 | 318.25588 | 0.035 |
| C18H35NO   | 1 | [M-2H+K]-  | 318.22030 | 281.27186 | 0.515 |
| C21H35NO   | 1 | [M+H]+     | 318.27930 | 317.27186 | 0.500 |
| C17H25ClO2 | 1 | [M+Na]+    | 319.14380 | 296.15431 | 0.849 |
| C22H24O2   | 1 | [M-H]-     | 319.17040 | 320.17763 | 0.125 |
| C19H28O4   | 1 | [M-H]-     | 319.19150 | 320.19876 | 0.028 |
| C20H32O3   | 2 | [M-H]-     | 319.22790 | 320.23515 | 0.075 |
| C21H36O2   | 2 | [M-H]-     | 319.26430 | 320.27153 | 0.122 |
| C17H33NO2  | 1 | [M-2H+K]-  | 320.19920 | 283.25113 | 1.652 |
| C18H37NO   | 1 | [M-2H+K]-  | 320.23590 | 283.28751 | 0.668 |
| C20H34O3   | 2 | [M-H]-     | 321.24340 | 322.25080 | 0.392 |
| C21H38O2   | 1 | [M-H]-     | 321.27980 | 322.28718 | 0.345 |
| C17H35NO2  | 2 | [M-2H+K]-  | 322.21510 | 285.26678 | 0.866 |
| C18H39NO   | 1 | [M-2H+K]-  | 322.25130 | 285.30316 | 1.440 |
| C20H37NO2  | 2 | [M-H]-     | 322.27510 | 323.28243 | 0.183 |
| C18H28O5   | 1 | [M-H]-     | 323.18640 | 324.19368 | 0.019 |
| C22H28O2   | 1 | [M-H]-     | 323.20160 | 324.20893 | 0.186 |
| C19H32O4   | 1 | [M-H]-     | 323.22270 | 324.23006 | 0.282 |
| C23H32O    | 1 | [M-H]-     | 323.23810 | 324.24532 | 0.167 |
| C20H36O3   | 1 | [M-H]-     | 323.25910 | 324.26645 | 0.235 |
| C21H40O2   | 2 | [M-H]-     | 323.29560 | 324.30283 | 0.121 |
| C16H33NO3  | 1 | [M-2H+K]-  | 324.19420 | 287.24604 | 1.370 |
| C18H30O5   | 1 | [M-H]-     | 325.20210 | 326.20933 | 0.135 |
| C19H34O4   | 1 | [M-H]-     | 325.23850 | 326.24571 | 0.181 |
| C20H36O3   | 3 | [M+H]+     | 325.27430 | 324.26645 | 1.774 |
| C20H38O3   | 2 | [M-H]-     | 325.27480 | 326.28210 | 0.080 |
| C21H42O2   | 2 | [M-H]-     | 325.31120 | 326.31848 | 0.034 |
| C18H31NO4  | 3 | [M+H]+     | 326.23100 | 325.22531 | 4.862 |
| C20H24O4   | 1 | [M-H]-     | 327.16040 | 328.16746 | 0.642 |
| C21H28O3   | 1 | [M-H]-     | 327.19670 | 328.20385 | 0.379 |
| C18H30O5   | 1 | [M+H]+     | 327.21670 | 326.20933 | 0.296 |
| C18H32O5   | 1 | [M-H]-     | 327.21780 | 328.22498 | 0.287 |
| C22H32O2   | 2 | [M-H]-     | 327.23300 | 328.24023 | 0.119 |
| C20H40O3   | 2 | [M-H]-     | 327.29040 | 328.29775 | 0.232 |
| C19H33NO2  | 2 | [M-2H+Na]- | 328.22550 | 307.25113 | 0.880 |
| C19H22O5   | 1 | [M-H]-     | 329.13960 | 330.14673 | 0.441 |
| C16H27F3O2 | 1 | [M-2H+Na]- | 329.16980 | 308.19632 | 3.573 |
| C21H30O3   | 2 | [M-H]-     | 329.21240 | 330.21950 | 0.529 |
| C18H34O5   | 1 | [M-H]-     | 329.23350 | 330.24063 | 0.437 |
| C22H34O2   | 3 | [M-H]-     | 329.24870 | 330.25588 | 0.270 |
| C19H24O5   | 1 | [M-H]-     | 331.15510 | 332.16238 | 0.015 |
| C20H28O4   | 2 | [M-H]-     | 331.19150 | 332.19876 | 0.027 |
| C21H32O3   | 2 | [M-H]-     | 331.22800 | 332.23515 | 0.374 |
| C22H36O2   | 1 | [M-H]-     | 331.26440 | 332.27153 | 0.420 |



|           |   |            |           |           |       |
|-----------|---|------------|-----------|-----------|-------|
| C20H3004  | 2 | [M-H]-     | 333.20710 | 334.21441 | 0.123 |
| C21H3403  | 1 | [M-H]-     | 333.24360 | 334.25080 | 0.222 |
| C22H3802  | 1 | [M-H]-     | 333.28000 | 334.28718 | 0.267 |
| C16H27NO4 | 1 | [M-2H+K]-  | 334.14240 | 297.19401 | 0.625 |
| C18H35NO2 | 2 | [M-2H+K]-  | 334.21530 | 297.26678 | 0.236 |
| C20H29FO3 | 2 | [M-H]-     | 335.20170 | 336.21007 | 3.294 |
| C20H3204  | 2 | [M-H]-     | 335.22280 | 336.23006 | 0.027 |
| C22H4002  | 1 | [M-H]-     | 335.29550 | 336.30283 | 0.182 |
| C16H27NO4 | 1 | [M+K]+     | 336.15790 | 297.19401 | 2.204 |
| C18H37NO2 | 2 | [M-2H+K]-  | 336.23060 | 299.28243 | 1.276 |
| C19H3005  | 1 | [M-H]-     | 337.20200 | 338.20933 | 0.166 |
| C18H36O2S | 1 | [M-2H+Na]- | 337.21730 | 316.24360 | 2.856 |
| C20H3404  | 1 | [M-H]-     | 337.23850 | 338.24571 | 0.175 |
| C22H4202  | 1 | [M-H]-     | 337.31140 | 338.31848 | 0.560 |
| C18H39NO2 | 1 | [M-2H+K]-  | 338.24650 | 301.29808 | 0.529 |
| C21H35NO  | 2 | [M-2H+Na]- | 338.24650 | 317.27186 | 0.071 |
| C18H2806  | 1 | [M-H]-     | 339.18140 | 340.18859 | 0.233 |
| C20H3604  | 1 | [M-H]-     | 339.25400 | 340.26136 | 0.268 |
| C21H4003  | 1 | [M-H]-     | 339.29040 | 340.29775 | 0.224 |
| C22H4402  | 1 | [M-H]-     | 339.32690 | 340.33413 | 0.115 |
| C20H33NO  | 1 | [M-2H+K]-  | 340.20450 | 303.25621 | 0.923 |
| C18H3006  | 2 | [M-H]-     | 341.19700 | 342.20424 | 0.085 |
| C22H3003  | 2 | [M-H]-     | 341.21220 | 342.21950 | 0.076 |
| C18H35FO2 | 1 | [M+K]+     | 341.22430 | 302.26211 | 2.810 |
| C21H340   | 1 | [M+K]+     | 341.22430 | 302.26097 | 0.539 |
| C19H3405  | 3 | [M-H]-     | 341.23330 | 342.24063 | 0.164 |
| C23H3402  | 1 | [M-H]-     | 341.24850 | 342.25588 | 0.325 |
| C20H3804  | 1 | [M-H]-     | 341.26960 | 342.27701 | 0.413 |
| C21H4203  | 2 | [M-H]-     | 341.30610 | 342.31340 | 0.076 |
| C20H35NO  | 1 | [M-2H+K]-  | 342.22000 | 305.27186 | 1.356 |
| C19H2006  | 1 | [M-H]-     | 343.11870 | 344.12599 | 0.058 |
| C21H2804  | 1 | [M-H]-     | 343.19150 | 344.19876 | 0.026 |
| C22H3203  | 2 | [M-H]-     | 343.22790 | 344.23515 | 0.070 |
| C19H3405  | 1 | [M+H]+     | 343.24880 | 342.24063 | 2.613 |
| C19H3605  | 2 | [M-H]-     | 343.24910 | 344.25628 | 0.274 |
| C23H3602  | 2 | [M-H]-     | 343.26430 | 344.27153 | 0.114 |
| C18H29NO3 | 1 | [M-2H+K]-  | 344.16280 | 307.21474 | 1.581 |
| C19H2206  | 1 | [M-H]-     | 345.13440 | 346.14164 | 0.087 |
| C20H2605  | 1 | [M-H]-     | 345.17070 | 346.17803 | 0.159 |
| C21H3004  | 1 | [M-H]-     | 345.20700 | 346.21441 | 0.408 |
| C22H3403  | 2 | [M-H]-     | 345.24350 | 346.25080 | 0.075 |
| C23H3802  | 1 | [M-H]-     | 345.28000 | 346.28718 | 0.258 |
| C19H35NO2 | 1 | [M-2H+K]-  | 346.21500 | 309.26678 | 1.095 |
| C22H37NO2 | 2 | [M-H]-     | 346.27520 | 347.28243 | 0.118 |
| C23H39NO  | 1 | [M+H]+     | 346.31060 | 345.30316 | 0.459 |
| C19H2406  | 2 | [M-H]-     | 347.15000 | 348.15729 | 0.058 |
| C19H2206  | 1 | [M+H]+     | 347.15010 | 346.14164 | 3.408 |
| C20H2805  | 2 | [M-H]-     | 347.18630 | 348.19368 | 0.305 |
| C24H2802  | 2 | [M-H]-     | 347.20170 | 348.20893 | 0.115 |
| C21H3204  | 2 | [M-H]-     | 347.22280 | 348.23006 | 0.026 |
| C23H4002  | 1 | [M-H]-     | 347.29570 | 348.30283 | 0.400 |
| C19H37NO2 | 1 | [M-2H+K]-  | 348.23060 | 311.28243 | 1.232 |
| C22H39NO2 | 2 | [M-H]-     | 348.29080 | 349.29808 | 0.026 |

|            |   |            |           |           |       |
|------------|---|------------|-----------|-----------|-------|
| C19H26O6   | 1 | [M-H]-     | 349.16580 | 350.17294 | 0.372 |
| C20H30O5   | 2 | [M-H]-     | 349.20210 | 350.20933 | 0.126 |
| C21H34O4   | 3 | [M-H]-     | 349.23850 | 350.24571 | 0.169 |
| C22H38O3   | 1 | [M-H]-     | 349.27480 | 350.28210 | 0.074 |
| C23H42O2   | 1 | [M-H]-     | 349.31120 | 350.31848 | 0.031 |
| C18H35NO3  | 1 | [M-2H+K]-  | 350.21000 | 313.26169 | 0.839 |
| C16H34NO5P | 1 | [M-H]-     | 350.21000 | 351.21746 | 0.548 |
| C19H39NO2  | 1 | [M-2H+K]-  | 350.24640 | 313.29808 | 0.797 |
| C22H41NO2  | 2 | [M-H]-     | 350.30650 | 351.31373 | 0.117 |
| C20H32O5   | 2 | [M-H]-     | 351.21780 | 352.22498 | 0.268 |
| C21H36O4   | 2 | [M-H]-     | 351.25410 | 352.26136 | 0.026 |
| C23H44O2   | 2 | [M-H]-     | 351.32670 | 352.33413 | 0.458 |
| C17H33NO4  | 1 | [M-2H+K]-  | 352.18920 | 315.24096 | 1.019 |
| C18H37NO3  | 1 | [M-2H+K]-  | 352.22580 | 315.27734 | 0.409 |
| C16H36NO5P | 2 | [M-H]-     | 352.22580 | 353.23311 | 0.119 |
| C22H37NO   | 2 | [M-2H+Na]- | 352.26190 | 331.28751 | 0.778 |
| C22H41NO2  | 1 | [M+H]+     | 352.32100 | 351.31373 | 0.017 |
| C22H43NO2  | 2 | [M-H]-     | 352.32220 | 353.32938 | 0.258 |
| C19H30O6   | 1 | [M-H]-     | 353.19700 | 354.20424 | 0.082 |
| C23H30O3   | 1 | [M-H]-     | 353.21230 | 354.21950 | 0.210 |
| C20H34O5   | 2 | [M-H]-     | 353.23340 | 354.24063 | 0.125 |
| C24H34O2   | 2 | [M-H]-     | 353.24870 | 354.25588 | 0.252 |
| C21H36O4   | 1 | [M+H]+     | 353.26940 | 352.26136 | 2.157 |
| C21H38O4   | 4 | [M-H]-     | 353.26980 | 354.27701 | 0.167 |
| C25H38O    | 1 | [M-H]-     | 353.28500 | 354.29227 | 0.011 |
| C22H42O3   | 1 | [M-H]-     | 353.30610 | 354.31340 | 0.074 |
| C23H46O2   | 1 | [M-H]-     | 353.34250 | 354.34978 | 0.031 |
| C18H39NO3  | 1 | [M-2H+K]-  | 354.24130 | 317.29299 | 0.830 |
| C22H43NO2  | 1 | [M+H]+     | 354.33670 | 353.32938 | 0.124 |
| C19H32O6   | 1 | [M-H]-     | 355.21280 | 356.21989 | 0.504 |
| C23H32O3   | 1 | [M-H]-     | 355.22780 | 356.23515 | 0.214 |
| C20H36O5   | 1 | [M-H]-     | 355.24890 | 356.25628 | 0.298 |
| C24H36O2   | 2 | [M-H]-     | 355.26420 | 356.27153 | 0.172 |
| C21H40O4   | 2 | [M-H]-     | 355.28530 | 356.29266 | 0.256 |
| C25H40O    | 2 | [M-H]-     | 355.30070 | 356.30792 | 0.152 |
| C22H44O3   | 1 | [M-H]-     | 355.32170 | 356.32905 | 0.214 |
| C20H33NO2  | 1 | [M-2H+K]-  | 356.19940 | 319.25113 | 0.924 |
| C18H39NO3  | 4 | [M+K]+     | 356.25660 | 317.29299 | 1.280 |
| C22H45NO2  | 1 | [M+H]+     | 356.35250 | 355.34503 | 0.544 |
| C16H31BrO2 | 1 | [M+Na]+    | 357.13970 | 334.15074 | 0.734 |
| C21H26O5   | 2 | [M-H]-     | 357.17080 | 358.17803 | 0.126 |
| C22H30O4   | 4 | [M-H]-     | 357.20720 | 358.21441 | 0.165 |
| C23H34O3   | 1 | [M-H]-     | 357.24370 | 358.25080 | 0.487 |
| C20H38O5   | 1 | [M-H]-     | 357.26490 | 358.27193 | 0.683 |
| C24H38O2   | 6 | [M-H]-     | 357.28010 | 358.28718 | 0.529 |
| C25H42O    | 1 | [M-H]-     | 357.31630 | 358.32357 | 0.011 |
| C25H40O    | 1 | [M+H]+     | 357.31680 | 356.30792 | 4.497 |
| C20H35NO2  | 1 | [M-2H+K]-  | 358.21490 | 321.26678 | 1.337 |
| C19H20O7   | 1 | [M-H]-     | 359.11370 | 360.12091 | 0.181 |
| C21H28O5   | 2 | [M-H]-     | 359.18640 | 360.19368 | 0.017 |
| C22H32O4   | 2 | [M-H]-     | 359.22270 | 360.23006 | 0.253 |
| C23H36O3   | 2 | [M-H]-     | 359.25900 | 360.26645 | 0.490 |
| C24H40O2   | 6 | [M-H]-     | 359.29540 | 360.30283 | 0.448 |

|            |   |            |           |           |       |
|------------|---|------------|-----------|-----------|-------|
| C22H29NO2  | 2 | [M-2H+Na]- | 360.19430 | 339.21983 | 0.525 |
| C24H41NO   | 1 | [M+H]+     | 360.32720 | 359.31881 | 3.078 |
| C19H22O7   | 1 | [M-H]-     | 361.12930 | 362.13656 | 0.042 |
| C20H26O6   | 2 | [M-H]-     | 361.16570 | 362.17294 | 0.083 |
| C21H30O5   | 2 | [M-H]-     | 361.20210 | 362.20933 | 0.122 |
| C22H34O4   | 1 | [M-H]-     | 361.23840 | 362.24571 | 0.113 |
| C23H38O3   | 2 | [M-H]-     | 361.27480 | 362.28210 | 0.072 |
| C24H42O2   | 4 | [M-H]-     | 361.31120 | 362.31848 | 0.030 |
| C18H31NO4  | 1 | [M-2H+K]-  | 362.17370 | 325.22531 | 0.577 |
| C20H39NO2  | 1 | [M-2H+K]-  | 362.24640 | 325.29808 | 0.770 |
| C20H39NO3  | 4 | [M-2H+Na]- | 362.26730 | 341.29299 | 0.977 |
| C22H37NO3  | 2 | [M-H]-     | 362.27030 | 363.27734 | 0.624 |
| C19H24O7   | 1 | [M-H]-     | 363.14500 | 364.15221 | 0.179 |
| C20H28O6   | 1 | [M-H]-     | 363.18130 | 364.18859 | 0.058 |
| C21H32O5   | 2 | [M-H]-     | 363.21770 | 364.22498 | 0.017 |
| C25H32O2   | 1 | [M-H]-     | 363.23290 | 364.24023 | 0.168 |
| C20H36O4   | 1 | [M+Na]+    | 363.25220 | 340.26136 | 4.454 |
| C22H34O4   | 1 | [M+H]+     | 363.25220 | 362.24571 | 2.169 |
| C22H36O4   | 2 | [M-H]-     | 363.25410 | 364.26136 | 0.025 |
| C21H40O2   | 4 | [M+K]+     | 363.26480 | 324.30283 | 3.251 |
| C23H40O3   | 2 | [M-H]-     | 363.29050 | 364.29775 | 0.066 |
| C22H44O2   | 1 | [M+Na]+    | 363.32490 | 340.33413 | 4.261 |
| C24H42O2   | 1 | [M+H]+     | 363.32490 | 362.31848 | 2.362 |
| C24H44O2   | 2 | [M-H]-     | 363.32700 | 364.33413 | 0.383 |
| C18H33NO4  | 1 | [M-2H+K]-  | 364.18920 | 327.24096 | 0.986 |
| C19H37NO3  | 1 | [M-2H+K]-  | 364.22550 | 327.27734 | 1.219 |
| C17H36NO5P | 1 | [M-H]-     | 364.22550 | 365.23311 | 0.939 |
| C20H41NO2  | 2 | [M-2H+K]-  | 364.26180 | 327.31373 | 1.452 |
| C20H30O6   | 2 | [M-H]-     | 365.19690 | 366.20424 | 0.194 |
| C21H34O5   | 2 | [M-H]-     | 365.23340 | 366.24063 | 0.120 |
| C24H46O2   | 1 | [M-H]-     | 365.34270 | 366.34978 | 0.517 |
| C20H43NO2  | 1 | [M-2H+K]-  | 366.27750 | 329.32938 | 1.308 |
| C23H39NO   | 2 | [M-2H+Na]- | 366.27750 | 345.30316 | 0.885 |
| C22H41NO3  | 2 | [M-H]-     | 366.30140 | 367.30864 | 0.071 |
| C20H32O6   | 2 | [M-H]-     | 367.21270 | 368.21989 | 0.215 |
| C24H32O3   | 2 | [M-H]-     | 367.22790 | 368.23515 | 0.065 |
| C21H34O5   | 4 | [M+H]+     | 367.24850 | 366.24063 | 1.626 |
| C21H36O5   | 2 | [M-H]-     | 367.24920 | 368.25628 | 0.528 |
| C25H36O2   | 1 | [M-H]-     | 367.26440 | 368.27153 | 0.378 |
| C23H44O3   | 1 | [M-H]-     | 367.32190 | 368.32905 | 0.338 |
| C24H48O2   | 1 | [M-H]-     | 367.35820 | 368.36543 | 0.106 |
| C22H43NO3  | 6 | [M-H]-     | 368.31700 | 369.32429 | 0.065 |
| C20H34O6   | 1 | [M-H]-     | 369.22850 | 370.23554 | 0.620 |
| C24H34O3   | 2 | [M-H]-     | 369.24360 | 370.25080 | 0.200 |
| C22H42O4   | 1 | [M-H]-     | 369.30120 | 370.30831 | 0.431 |
| C23H46O3   | 2 | [M-H]-     | 369.33760 | 370.34470 | 0.471 |
| C22H36FNO  | 1 | [M-2H+Na]- | 370.25150 | 349.27809 | 3.384 |
| C22H37NO2  | 1 | [M+Na]+    | 370.27350 | 347.28243 | 4.996 |
| C20H28O4   | 2 | [M+K]+     | 371.16280 | 332.19876 | 2.395 |
| C22H28O5   | 2 | [M-H]-     | 371.18630 | 372.19368 | 0.286 |
| C20H36O6   | 1 | [M-H]-     | 371.24400 | 372.25119 | 0.213 |
| C24H36O3   | 1 | [M-H]-     | 371.25920 | 372.26645 | 0.065 |
| C25H40O2   | 1 | [M-H]-     | 371.29570 | 372.30283 | 0.374 |

|            |   |            |           |           |       |
|------------|---|------------|-----------|-----------|-------|
| C26H44O    | 1 | [M-H]-     | 371.33180 | 372.33922 | 0.393 |
| C20H30O5   | 1 | [M+Na]+    | 373.19980 | 350.20933 | 3.357 |
| C22H28O5   | 1 | [M+H]+     | 373.19980 | 372.19368 | 3.089 |
| C22H30O5   | 6 | [M-H]-     | 373.20190 | 374.20933 | 0.418 |
| C23H34O4   | 1 | [M-H]-     | 373.23830 | 374.24571 | 0.378 |
| C22H38O3   | 1 | [M+Na]+    | 373.27120 | 350.28210 | 0.313 |
| C24H38O3   | 1 | [M-H]-     | 373.27470 | 374.28210 | 0.338 |
| C25H42O2   | 2 | [M-H]-     | 373.31120 | 374.31848 | 0.029 |
| C24H39NO2  | 1 | [M+H]+     | 374.30610 | 373.29808 | 1.988 |
| C21H28O6   | 2 | [M-H]-     | 375.18130 | 376.18859 | 0.056 |
| C22H32O5   | 4 | [M-H]-     | 375.21760 | 376.22498 | 0.283 |
| C23H36O4   | 2 | [M-H]-     | 375.25400 | 376.26136 | 0.243 |
| C24H40O3   | 2 | [M-H]-     | 375.29020 | 376.29775 | 0.735 |
| C25H44O2   | 2 | [M-H]-     | 375.32650 | 376.33413 | 0.962 |
| C20H37NO3  | 1 | [M-2H+K]-  | 376.22540 | 339.27734 | 1.446 |
| C20H26O7   | 1 | [M-H]-     | 377.16060 | 378.16786 | 0.037 |
| C21H30O6   | 2 | [M-H]-     | 377.19710 | 378.20424 | 0.342 |
| C22H34O5   | 4 | [M-H]-     | 377.23350 | 378.24063 | 0.382 |
| C23H38O4   | 6 | [M-H]-     | 377.26980 | 378.27701 | 0.156 |
| C24H42O3   | 2 | [M-H]-     | 377.30620 | 378.31340 | 0.196 |
| C25H46O2   | 4 | [M-H]-     | 377.34250 | 378.34978 | 0.029 |
| C18H38NO5P | 2 | [M-H]-     | 378.24140 | 379.24876 | 0.243 |
| C23H41NO3  | 6 | [M-H]-     | 378.30170 | 379.30864 | 0.862 |
| C22H44FNO  | 2 | [M-2H+Na]- | 378.31420 | 357.34069 | 3.048 |
| C17H33O7P  | 1 | [M-H]-     | 379.18890 | 380.19639 | 0.588 |
| C21H29FO5  | 2 | [M-H]-     | 379.19150 | 380.19990 | 2.991 |
| C24H28O4   | 1 | [M-H]-     | 379.19150 | 380.19876 | 0.024 |
| C22H36O5   | 4 | [M-H]-     | 379.24900 | 380.25628 | 0.016 |
| C23H38O4   | 1 | [M+H]+     | 379.28470 | 378.27701 | 1.086 |
| C21H44NO2  | 1 | [M-2H+K]-  | 379.28540 | 342.33720 | 1.065 |
| C23H40O4   | 6 | [M-H]-     | 379.28540 | 380.29266 | 0.024 |
| C24H44O3   | 2 | [M-H]-     | 379.32180 | 380.32905 | 0.063 |
| C25H48O2   | 4 | [M-H]-     | 379.35820 | 380.36543 | 0.103 |
| C18H40NO5P | 2 | [M-H]-     | 380.25690 | 381.26441 | 0.636 |
| C24H41NO   | 2 | [M-2H+Na]- | 380.29310 | 359.31881 | 0.983 |
| C22H44FNO  | 2 | [M+Na]+    | 380.33170 | 357.34069 | 4.696 |
| C17H35O7P  | 1 | [M-H]-     | 381.20450 | 382.21204 | 0.716 |
| C24H30O4   | 1 | [M-H]-     | 381.20730 | 382.21441 | 0.417 |
| C20H40O4   | 3 | [M-2H+K]-  | 381.24080 | 344.29266 | 1.209 |
| C25H34O3   | 2 | [M-H]-     | 381.24370 | 382.25080 | 0.456 |
| C22H38O5   | 3 | [M-H]-     | 381.26480 | 382.27193 | 0.378 |
| C26H38O2   | 1 | [M-H]-     | 381.28000 | 382.28718 | 0.233 |
| C23H42O4   | 3 | [M-H]-     | 381.30120 | 382.30831 | 0.417 |
| C27H42O    | 1 | [M-H]-     | 381.31630 | 382.32357 | 0.010 |
| C24H46O3   | 2 | [M-H]-     | 381.33750 | 382.34470 | 0.194 |
| C25H50O2   | 2 | [M-H]-     | 381.37380 | 382.38108 | 0.029 |
| C16H34NO7P | 1 | [M-H]-     | 382.19970 | 383.20729 | 0.842 |
| C22H35NO2  | 1 | [M-2H+K]-  | 382.21500 | 345.26678 | 0.992 |
| C22H41NO4  | 1 | [M-H]-     | 382.29670 | 383.30356 | 1.075 |
| C17H30O7   | 1 | [M-2H+K]-  | 383.14720 | 346.19916 | 1.451 |
| C19H26O6S  | 1 | [M+H]+     | 383.15320 | 382.14501 | 2.375 |
| C18H34O6   | 1 | [M-2H+K]-  | 383.18350 | 346.23554 | 1.673 |
| C24H32O4   | 2 | [M-H]-     | 383.22270 | 384.23006 | 0.237 |

|            |   |            |           |           |       |
|------------|---|------------|-----------|-----------|-------|
| C21H40N2O4 | 2 | [M-H]-     | 383.28980 | 384.29881 | 4.534 |
| C26H40O2   | 1 | [M-H]-     | 383.29540 | 384.30283 | 0.420 |
| C23H44O4   | 2 | [M-H]-     | 383.31660 | 384.32396 | 0.237 |
| C27H44O    | 1 | [M-H]-     | 383.33190 | 384.33922 | 0.120 |
| C24H48O3   | 2 | [M-H]-     | 383.35310 | 384.36035 | 0.063 |
| C22H35NO2  | 1 | [M+K]+     | 384.22970 | 345.26678 | 0.596 |
| C23H38FNO  | 1 | [M-2H+Na]- | 384.26700 | 363.29374 | 3.651 |
| C20H33BrO2 | 1 | [M+H]+     | 385.17370 | 384.16639 | 0.083 |
| C21H30O4   | 1 | [M+K]+     | 385.17840 | 346.21441 | 2.178 |
| C18H36O6   | 1 | [M-2H+K]-  | 385.19900 | 348.25119 | 2.053 |
| C23H30O5   | 1 | [M-H]-     | 385.20190 | 386.20933 | 0.405 |
| C24H34O4   | 2 | [M-H]-     | 385.23840 | 386.24571 | 0.106 |
| C26H42O2   | 4 | [M-H]-     | 385.31130 | 386.31848 | 0.231 |
| C18H37NO4S | 1 | [M+Na]+    | 386.23290 | 363.24433 | 1.691 |
| C20H37NO4S | 1 | [M-H]-     | 386.23850 | 387.24433 | 3.723 |
| C22H28O6   | 1 | [M-H]-     | 387.18130 | 388.18859 | 0.054 |
| C23H32O5   | 2 | [M-H]-     | 387.21780 | 388.22498 | 0.243 |
| C24H36O4   | 2 | [M-H]-     | 387.25420 | 388.26136 | 0.281 |
| C25H40O3   | 4 | [M-H]-     | 387.29060 | 388.29775 | 0.320 |
| C26H44O2   | 2 | [M-H]-     | 387.32690 | 388.33413 | 0.101 |
| C27H43F    | 1 | [M+H]+     | 387.34140 | 386.33488 | 1.952 |
| C17H24O10  | 1 | [M+H]+     | 389.14350 | 388.13695 | 1.868 |
| C22H30O6   | 1 | [M-H]-     | 389.19710 | 390.20424 | 0.331 |
| C23H34O5   | 4 | [M-H]-     | 389.23340 | 390.24063 | 0.113 |
| C24H38O4   | 1 | [M-H]-     | 389.26970 | 390.27701 | 0.105 |
| C25H42O3   | 1 | [M-H]-     | 389.30610 | 390.31340 | 0.067 |
| C26H46O2   | 1 | [M-H]-     | 389.34240 | 390.34978 | 0.285 |
| C21H39NO3  | 1 | [M-2H+K]-  | 390.24110 | 353.29299 | 1.266 |
| C22H41NO3  | 1 | [M+Na]+    | 390.29780 | 367.30864 | 0.167 |
| C19H30O5S  | 1 | [M-2H+Na]- | 391.15490 | 370.18140 | 2.960 |
| C20H32O5   | 1 | [M+K]+     | 391.18830 | 352.22498 | 0.445 |
| C19H37O6P  | 1 | [M-H]-     | 391.22520 | 392.23278 | 0.787 |
| C24H40O4   | 1 | [M-H]-     | 391.28530 | 392.29266 | 0.233 |
| C26H48O2   | 1 | [M-H]-     | 391.35800 | 392.36543 | 0.411 |
| C21H41NO3  | 1 | [M-2H+K]-  | 392.25680 | 355.30864 | 1.132 |
| C19H40NO5P | 1 | [M-H]-     | 392.25680 | 393.26441 | 0.872 |
| C24H37NO2  | 2 | [M-2H+Na]- | 392.25680 | 371.28243 | 0.737 |
| C22H39N3O3 | 2 | [M-H]-     | 392.29320 | 393.29914 | 3.385 |
| C22H45NO2  | 1 | [M-2H+K]-  | 392.29320 | 355.34503 | 1.094 |
| C20H26O8   | 1 | [M-H]-     | 393.15560 | 394.16277 | 0.252 |
| C25H30O4   | 1 | [M-H]-     | 393.20710 | 394.21441 | 0.104 |
| C22H32O4S  | 1 | [M+H]+     | 393.21000 | 392.20213 | 1.500 |
| C24H34O3   | 1 | [M+Na]+    | 393.24010 | 370.25080 | 0.211 |
| C21H38O4   | 1 | [M+K]+     | 393.24010 | 354.27701 | 0.155 |
| C19H37O6P  | 1 | [M+H]+     | 393.24010 | 392.23278 | 0.114 |
| C23H38O5   | 1 | [M-H]-     | 393.26490 | 394.27193 | 0.620 |
| C27H38O2   | 1 | [M-H]-     | 393.27990 | 394.28718 | 0.028 |
| C24H42O4   | 2 | [M-H]-     | 393.30100 | 394.30831 | 0.104 |
| C26H50O2   | 4 | [M-H]-     | 393.37370 | 394.38108 | 0.282 |
| C16H19O8S  | 1 | [M+Na]+    | 394.06840 | 371.08010 | 2.337 |
| C22H45NO2  | 1 | [M+K]+     | 394.30670 | 355.34503 | 3.751 |
| C22H39N3O3 | 1 | [M+H]+     | 394.30670 | 393.29914 | 0.713 |
| C25H43NO   | 2 | [M-2H+Na]- | 394.30900 | 373.33446 | 0.314 |

|            |   |            |           |           |       |
|------------|---|------------|-----------|-----------|-------|
| C22H36O6   | 1 | [M-H]-     | 395.24410 | 396.25119 | 0.453 |
| C23H40O5   | 2 | [M-H]-     | 395.28050 | 396.28758 | 0.491 |
| C27H40O2   | 2 | [M-H]-     | 395.29560 | 396.30283 | 0.099 |
| C26H52O2   | 2 | [M-H]-     | 395.38950 | 396.39673 | 0.099 |
| C24H30O5   | 1 | [M-H]-     | 397.20210 | 398.20933 | 0.111 |
| C25H34O4   | 2 | [M-H]-     | 397.23850 | 398.24571 | 0.149 |
| C26H38O3   | 2 | [M-H]-     | 397.27480 | 398.28210 | 0.065 |
| C27H42O2   | 2 | [M-H]-     | 397.31130 | 398.31848 | 0.224 |
| C24H46O4   | 2 | [M-H]-     | 397.33240 | 398.33961 | 0.148 |
| C25H50O3   | 1 | [M-H]-     | 397.36890 | 398.37600 | 0.438 |
| C22H35NO3  | 1 | [M-2H+K]-  | 398.21010 | 361.26169 | 0.487 |
| C23H39NO2  | 1 | [M-2H+K]-  | 398.24650 | 361.29808 | 0.449 |
| C25H51NO2  | 1 | [M+H]+     | 398.39950 | 397.39198 | 0.610 |
| C24H32O5   | 1 | [M-H]-     | 399.21780 | 400.22498 | 0.235 |
| C25H34O4   | 1 | [M+H]+     | 399.25110 | 398.24571 | 4.729 |
| C23H36O4   | 1 | [M+Na]+    | 399.25110 | 376.26136 | 1.297 |
| C25H36O4   | 2 | [M-H]-     | 399.25410 | 400.26136 | 0.023 |
| C26H40O3   | 2 | [M-H]-     | 399.29040 | 400.29775 | 0.190 |
| C27H44O2   | 1 | [M-H]-     | 399.32680 | 400.33413 | 0.153 |
| C23H30O6   | 1 | [M-H]-     | 401.19720 | 402.20424 | 0.571 |
| C24H34O5   | 2 | [M-H]-     | 401.23360 | 402.24063 | 0.608 |
| C25H38O4   | 6 | [M-H]-     | 401.26990 | 402.27701 | 0.396 |
| C26H42O3   | 1 | [M-H]-     | 401.30620 | 402.31340 | 0.184 |
| C27H46O2   | 2 | [M-H]-     | 401.34250 | 402.34978 | 0.027 |
| C27H47NO   | 1 | [M+H]+     | 402.37440 | 401.36576 | 3.377 |
| C23H32O6   | 2 | [M-H]-     | 403.21280 | 404.21989 | 0.444 |
| C24H36O5   | 1 | [M-H]-     | 403.24900 | 404.25628 | 0.015 |
| C25H40O4   | 1 | [M-H]-     | 403.28550 | 404.29266 | 0.270 |
| C26H44O3   | 1 | [M-H]-     | 403.32190 | 404.32905 | 0.307 |
| C27H48O2   | 3 | [M-H]-     | 403.35830 | 404.36543 | 0.345 |
| C17H38NO5P | 1 | [M-2H+K]-  | 404.19930 | 367.24876 | 4.795 |
| C22H30O7   | 1 | [M-H]-     | 405.19200 | 406.19916 | 0.281 |
| C23H34O6   | 1 | [M-H]-     | 405.22840 | 406.23554 | 0.318 |
| C24H38O5   | 1 | [M-H]-     | 405.26480 | 406.27193 | 0.355 |
| C25H42O4   | 1 | [M-H]-     | 405.30110 | 406.30831 | 0.146 |
| C27H50O2   | 1 | [M-H]-     | 405.37390 | 406.38108 | 0.220 |
| C23H47NO2  | 1 | [M-2H+K]-  | 406.30880 | 369.36068 | 1.181 |
| C26H43NO   | 2 | [M-2H+Na]- | 406.30880 | 385.33446 | 0.797 |
| C19H37O7P  | 1 | [M-H]-     | 407.21940 | 408.22769 | 2.512 |
| C26H32O4   | 1 | [M-H]-     | 407.22280 | 408.23006 | 0.022 |
| C23H36O6   | 1 | [M-H]-     | 407.24380 | 408.25119 | 0.297 |
| C24H40O5   | 1 | [M-H]-     | 407.28020 | 408.28758 | 0.260 |
| C28H40O2   | 1 | [M-H]-     | 407.29550 | 408.30283 | 0.150 |
| C23H46O4   | 1 | [M-2H+Na]- | 407.31330 | 386.33961 | 2.384 |
| C26H48O3   | 1 | [M-H]-     | 407.35300 | 408.36035 | 0.187 |
| C27H52O2   | 1 | [M-H]-     | 407.38940 | 408.39673 | 0.150 |
| C14H28NO8P | 1 | [M+K]+     | 408.11680 | 369.15526 | 3.938 |
| C15H32NO7P | 1 | [M+K]+     | 408.15460 | 369.19164 | 0.470 |
| C26H45NO   | 2 | [M-2H+Na]- | 408.32470 | 387.35011 | 0.181 |
| C22H34O7   | 1 | [M-H]-     | 409.22340 | 410.23046 | 0.523 |
| C19H39O7P  | 1 | [M-H]-     | 409.23530 | 410.24334 | 1.889 |
| C23H38O6   | 1 | [M-H]-     | 409.25990 | 410.26684 | 0.804 |
| C27H38O3   | 1 | [M-H]-     | 409.27490 | 410.28210 | 0.181 |

|            |   |            |           |           |       |
|------------|---|------------|-----------|-----------|-------|
| C23H42N2O4 | 1 | [M-H]-     | 409.30660 | 410.31446 | 1.437 |
| C28H42O2   | 2 | [M-H]-     | 409.31140 | 410.31848 | 0.462 |
| C26H48O3   | 1 | [M+H]+     | 409.36710 | 408.36035 | 1.278 |
| C26H50O3   | 1 | [M-H]-     | 409.36880 | 410.37600 | 0.181 |
| C27H54O2   | 1 | [M-H]-     | 409.40510 | 410.41238 | 0.027 |
| C29H60     | 1 | [M+H]+     | 409.47760 | 408.46950 | 2.007 |
| C24H39NO2  | 1 | [M-2H+K]-  | 410.24640 | 373.29808 | 0.680 |
| C26H45NO   | 1 | [M+Na]+    | 410.33920 | 387.35011 | 0.329 |
| C27H40O3   | 1 | [M-H]-     | 411.29050 | 412.29775 | 0.058 |
| C28H44O2   | 2 | [M-H]-     | 411.32680 | 412.33413 | 0.148 |
| C26H50O3   | 1 | [M+H]+     | 411.38380 | 410.37600 | 1.281 |
| C26H52O3   | 1 | [M-H]-     | 411.38450 | 412.39165 | 0.301 |
| C23H37NO3  | 1 | [M-2H+K]-  | 412.22560 | 375.27734 | 0.834 |
| C24H41NO2  | 1 | [M-2H+K]-  | 412.26200 | 375.31373 | 0.798 |
| C22H30O5   | 1 | [M+K]+     | 413.17280 | 374.20933 | 0.784 |
| C24H38O4   | 4 | [M+Na]+    | 413.26650 | 390.27701 | 0.648 |
| C25H42O3   | 1 | [M+Na]+    | 413.30180 | 390.31340 | 1.977 |
| C27H42O3   | 1 | [M-H]-     | 413.30610 | 414.31340 | 0.063 |
| C28H46O2   | 2 | [M-H]-     | 413.34250 | 414.34978 | 0.027 |
| C22H35NO4  | 1 | [M-2H+K]-  | 414.20510 | 377.25661 | 0.263 |
| C23H39NO3  | 1 | [M-2H+K]-  | 414.24130 | 377.29299 | 0.710 |
| C20H41NO4S | 1 | [M+Na]+    | 414.26450 | 391.27563 | 0.852 |
| C26H39NO3  | 1 | [M+H]+     | 414.30100 | 413.29299 | 1.760 |
| C22H34O4S  | 1 | [M-2H+Na]- | 415.19160 | 394.21778 | 2.030 |
| C24H32O6   | 2 | [M-H]-     | 415.21260 | 416.21989 | 0.051 |
| C23H36O4   | 1 | [M+K]+     | 415.22250 | 376.26136 | 4.843 |
| C19H37O6P  | 5 | [M+Na]+    | 415.22250 | 392.23278 | 1.207 |
| C25H36O5   | 1 | [M-H]-     | 415.24890 | 416.25628 | 0.255 |
| C26H40O4   | 1 | [M-H]-     | 415.28530 | 416.29266 | 0.219 |
| C27H44O3   | 1 | [M-H]-     | 415.32170 | 416.32905 | 0.183 |
| C28H48O2   | 2 | [M-H]-     | 415.35820 | 416.36543 | 0.094 |
| C29H50O    | 1 | [M+H]+     | 415.39500 | 414.38617 | 3.748 |
| C22H37NO4  | 1 | [M-2H+K]-  | 416.22060 | 379.27226 | 0.622 |
| C19H41O6P  | 1 | [M-2H+Na]- | 417.24050 | 396.26408 | 4.223 |
| C21H39O6P  | 1 | [M-H]-     | 417.24050 | 418.24843 | 1.577 |
| C26H42O4   | 2 | [M-H]-     | 417.30120 | 418.30831 | 0.381 |
| C27H46O3   | 1 | [M-H]-     | 417.33760 | 418.34470 | 0.417 |
| C28H50O2   | 3 | [M-H]-     | 417.37400 | 418.38108 | 0.453 |
| C22H39NO4  | 1 | [M-2H+K]-  | 418.23610 | 381.28791 | 0.978 |
| C23H41NO3  | 1 | [M+K]+     | 418.27170 | 379.30864 | 0.225 |
| C23H43NO3  | 1 | [M-2H+K]-  | 418.27250 | 381.32429 | 0.942 |
| C24H41N3O3 | 2 | [M-H]-     | 418.30890 | 419.31479 | 3.294 |
| C24H47NO2  | 1 | [M-2H+K]-  | 418.30890 | 381.36068 | 0.908 |
| C27H43NO   | 2 | [M-2H+Na]- | 418.30890 | 397.33446 | 0.535 |
| C20H37O7P  | 1 | [M-H]-     | 419.21980 | 420.22769 | 1.486 |
| C21H41O6P  | 1 | [M-H]-     | 419.25610 | 420.26408 | 1.689 |
| C29H40O2   | 1 | [M-H]-     | 419.29550 | 420.30283 | 0.145 |
| C27H42F2O  | 2 | [M-H]-     | 419.31370 | 420.32037 | 1.424 |
| C26H44O4   | 1 | [M-H]-     | 419.31660 | 420.32396 | 0.217 |
| C30H42O    | 1 | [M+H]+     | 419.33170 | 418.32357 | 2.044 |
| C27H43FO2  | 1 | [M+H]+     | 419.33170 | 418.32471 | 0.682 |
| C27H48O3   | 1 | [M-H]-     | 419.35300 | 420.36035 | 0.181 |
| C28H52O2   | 2 | [M-H]-     | 419.38940 | 420.39673 | 0.145 |

|            |   |            |           |           |       |
|------------|---|------------|-----------|-----------|-------|
| C23H45NO3  | 1 | [M-2H+K]-  | 420.28830 | 383.33994 | 0.581 |
| C25H41NO4  | 1 | [M+H]+     | 420.31190 | 419.30356 | 2.531 |
| C24H43N3O3 | 2 | [M-H]-     | 420.32460 | 421.33044 | 3.397 |
| C24H49NO2  | 1 | [M-2H+K]-  | 420.32460 | 383.37633 | 0.785 |
| C27H45NO   | 2 | [M-2H+Na]- | 420.32460 | 399.35011 | 0.414 |
| C15H28O7P2 | 1 | [M+K]+     | 421.09550 | 382.13103 | 3.132 |
| C23H31FO6  | 1 | [M-H]-     | 421.20200 | 422.21047 | 2.847 |
| C20H39O7P  | 1 | [M-H]-     | 421.23520 | 422.24334 | 2.072 |
| C24H38O6   | 1 | [M-H]-     | 421.25970 | 422.26684 | 0.306 |
| C21H43O6P  | 1 | [M-H]-     | 421.27180 | 422.27973 | 1.562 |
| C28H38O3   | 1 | [M-H]-     | 421.27490 | 422.28210 | 0.176 |
| C25H42O5   | 1 | [M-H]-     | 421.29600 | 422.30323 | 0.104 |
| C28H54O2   | 2 | [M-H]-     | 421.40530 | 422.41238 | 0.448 |
| C27H47NO   | 2 | [M-2H+Na]- | 422.34010 | 401.36576 | 0.767 |
| C19H37O8P  | 1 | [M-H]-     | 423.21470 | 424.22261 | 1.508 |
| C23H31FO6  | 1 | [M+H]+     | 423.21770 | 422.21047 | 0.109 |
| C20H41O7P  | 1 | [M-H]-     | 423.25020 | 424.25899 | 3.598 |
| C25H36O4   | 1 | [M+Na]+    | 423.25240 | 400.26136 | 4.295 |
| C20H39O7P  | 1 | [M+H]+     | 423.25240 | 422.24334 | 4.206 |
| C24H40O6   | 1 | [M-H]-     | 423.27560 | 424.28249 | 0.895 |
| C25H41FO4  | 2 | [M-H]-     | 423.29060 | 424.29889 | 2.407 |
| C28H40O3   | 1 | [M-H]-     | 423.29060 | 424.29775 | 0.293 |
| C29H44O2   | 1 | [M-H]-     | 423.32700 | 424.33413 | 0.328 |
| C28H56O2   | 1 | [M-H]-     | 423.42080 | 424.42803 | 0.092 |
| C29H58O    | 1 | [M+H]+     | 423.45760 | 422.44877 | 3.677 |
| C21H39NO6  | 1 | [M+Na]+    | 424.26780 | 401.27774 | 1.980 |
| C27H43N3O  | 1 | [M-H]-     | 424.33470 | 425.34061 | 3.200 |
| C21H29BrO4 | 1 | [M+H]+     | 425.13190 | 424.12492 | 0.699 |
| C27H38O4   | 1 | [M-H]-     | 425.27000 | 426.27701 | 0.609 |
| C28H42O3   | 1 | [M-H]-     | 425.30620 | 426.31340 | 0.174 |
| C29H46O2   | 1 | [M-H]-     | 425.34260 | 426.34978 | 0.209 |
| C26H50O4   | 1 | [M-H]-     | 425.36370 | 426.37091 | 0.139 |
| C30H50O    | 2 | [M-H]-     | 425.37890 | 426.38617 | 0.009 |
| C30H48O    | 1 | [M+H]+     | 425.37950 | 424.37052 | 4.013 |
| C24H39NO3  | 1 | [M-2H+K]-  | 426.24150 | 389.29299 | 0.221 |
| C22H38NO5P | 1 | [M-H]-     | 426.24150 | 427.24876 | 0.019 |
| C25H43NO2  | 1 | [M-2H+K]-  | 426.27800 | 389.32938 | 0.049 |
| C26H44FNO  | 1 | [M-2H+Na]- | 426.31430 | 405.34069 | 2.470 |
| C27H43N3O  | 1 | [M+H]+     | 426.34850 | 425.34061 | 1.433 |
| C18H28O9   | 1 | [M+K]+     | 427.13450 | 388.17334 | 4.650 |
| C27H40O4   | 1 | [M-H]-     | 427.28550 | 428.29266 | 0.255 |
| C28H44O3   | 1 | [M-H]-     | 427.32190 | 428.32905 | 0.290 |
| C29H48O2   | 1 | [M-H]-     | 427.35830 | 428.36543 | 0.325 |
| C23H37NO4  | 1 | [M-2H+K]-  | 428.22090 | 391.27226 | 0.096 |
| C22H37NO5S | 1 | [M+H]+     | 428.24510 | 427.23925 | 3.325 |
| C24H41NO3  | 1 | [M-2H+K]-  | 428.25720 | 391.30864 | 0.103 |
| C25H45NO2  | 1 | [M-2H+K]-  | 428.29360 | 391.34503 | 0.068 |
| C25H49NO4  | 3 | [M+H]+     | 428.37170 | 427.36616 | 4.055 |
| C17H26O10  | 1 | [M+K]+     | 429.11720 | 390.15260 | 3.377 |
| C20H29F3O4 | 1 | [M+K]+     | 429.16460 | 390.20180 | 0.806 |
| C26H38O5   | 1 | [M-H]-     | 429.26460 | 430.27193 | 0.130 |
| C27H42O4   | 1 | [M-H]-     | 429.30110 | 430.30831 | 0.137 |
| C28H46O3   | 1 | [M-H]-     | 429.33750 | 430.34470 | 0.172 |



|            |   |            |           |           |       |
|------------|---|------------|-----------|-----------|-------|
| C29H50O2   | 2 | [M-H]-     | 429.37400 | 430.38108 | 0.440 |
| C23H39NO4  | 1 | [M-2H+K]-  | 430.23620 | 393.28791 | 0.718 |
| C19H37O7P  | 2 | [M+Na]+    | 431.21690 | 408.22769 | 0.032 |
| C26H40O5   | 1 | [M-H]-     | 431.28030 | 432.28758 | 0.014 |
| C27H41FO3  | 1 | [M-H]-     | 431.29550 | 432.30397 | 2.792 |
| C27H42O4   | 1 | [M+H]+     | 431.31600 | 430.30831 | 0.955 |
| C27H44O4   | 1 | [M-H]-     | 431.31670 | 432.32396 | 0.021 |
| C28H48O3   | 1 | [M-H]-     | 431.35300 | 432.36035 | 0.176 |
| C29H52O2   | 1 | [M-H]-     | 431.38930 | 432.39673 | 0.373 |
| C22H39N3O3 | 1 | [M+K]+     | 432.26290 | 393.29914 | 1.407 |
| C24H45NO3  | 1 | [M-2H+K]-  | 432.28830 | 395.33994 | 0.564 |
| C26H51NO2  | 1 | [M+Na]+    | 432.38220 | 409.39198 | 2.310 |
| C18H35O7P  | 2 | [M+K]+     | 433.17530 | 394.21204 | 0.247 |
| C24H31FO6  | 1 | [M-H]-     | 433.20230 | 434.21047 | 2.075 |
| C22H34O7   | 1 | [M+Na]+    | 433.21950 | 410.23046 | 0.409 |
| C23H38O5   | 4 | [M+K]+     | 433.23300 | 394.27193 | 4.792 |
| C21H37O7P  | 4 | [M+H]+     | 433.23300 | 432.22769 | 4.547 |
| C19H39O7P  | 4 | [M+Na]+    | 433.23300 | 410.24334 | 1.006 |
| C26H42O5   | 1 | [M-H]-     | 433.29600 | 434.30323 | 0.102 |
| C27H43FO3  | 1 | [M-H]-     | 433.31140 | 434.31962 | 2.202 |
| C27H46O4   | 1 | [M-H]-     | 433.33260 | 434.33961 | 0.598 |
| C28H50O3   | 1 | [M-H]-     | 433.36900 | 434.37600 | 0.632 |
| C30H50     | 1 | [M+Na]+    | 433.37860 | 410.39125 | 4.320 |
| C29H54O2   | 1 | [M-H]-     | 433.40520 | 434.41238 | 0.205 |
| C26H39NO3  | 2 | [M-2H+Na]- | 434.26760 | 413.29299 | 0.124 |
| C27H43NO2  | 2 | [M-2H+Na]- | 434.30390 | 413.32938 | 0.320 |
| C26H43NO4  | 1 | [M+H]+     | 434.32650 | 433.31921 | 0.032 |
| C25H51NO2  | 1 | [M-2H+K]-  | 434.34020 | 397.39198 | 0.875 |
| C28H47NO   | 2 | [M-2H+Na]- | 434.34020 | 413.36570 | 0.368 |
| C22H40N2O4 | 1 | [M+K]+     | 435.26230 | 396.29881 | 0.786 |
| C25H40O6   | 1 | [M-H]-     | 435.27530 | 436.28249 | 0.181 |
| C27H48O4   | 1 | [M-H]-     | 435.34810 | 436.35526 | 0.250 |
| C28H52O3   | 1 | [M-H]-     | 435.38450 | 436.39165 | 0.285 |
| C29H56O2   | 1 | [M-H]-     | 435.42100 | 436.42803 | 0.549 |
| C26H39NO3  | 5 | [M+Na]+    | 436.28280 | 413.29299 | 1.341 |
| C23H45NO4  | 1 | [M-2H+K]-  | 436.28300 | 399.33486 | 1.052 |
| C21H44NO6P | 1 | [M-H]-     | 436.28300 | 437.29063 | 0.818 |
| C27H45NO2  | 2 | [M-2H+Na]- | 436.31950 | 415.34503 | 0.433 |
| C21H34O8   | 1 | [M+Na]+    | 437.21530 | 414.22537 | 1.619 |
| C25H42O6   | 1 | [M-H]-     | 437.29140 | 438.29814 | 1.210 |
| C29H42O3   | 1 | [M-H]-     | 437.30640 | 438.31340 | 0.627 |
| C26H46O5   | 1 | [M-H]-     | 437.32750 | 438.33453 | 0.558 |
| C27H48O4   | 2 | [M+H]+     | 437.36340 | 436.35526 | 1.971 |
| C29H58O2   | 1 | [M-H]-     | 437.43670 | 438.44368 | 0.661 |
| C21H44NO6P | 1 | [M+H]+     | 438.29810 | 437.29063 | 0.447 |
| C23H45NO4  | 1 | [M+K]+     | 438.29810 | 399.33486 | 0.208 |
| C27H47NO2  | 2 | [M-2H+Na]- | 438.33530 | 417.36068 | 0.091 |
| C23H31ClO6 | 1 | [M+H]+     | 439.18790 | 438.18092 | 0.674 |
| C24H32O5   | 1 | [M+K]+     | 439.18790 | 400.22498 | 0.515 |
| C27H43FO   | 1 | [M-2H+K]-  | 439.27990 | 402.32979 | 3.428 |
| C29H44O3   | 1 | [M-H]-     | 439.32170 | 440.32905 | 0.173 |
| C26H46O5   | 1 | [M+H]+     | 439.34190 | 438.33453 | 0.221 |
| C30H48O2   | 2 | [M-H]-     | 439.35820 | 440.36543 | 0.089 |

|            |   |            |           |           |       |
|------------|---|------------|-----------|-----------|-------|
| C28H56O3   | 2 | [M-H]-     | 439.41570 | 440.42295 | 0.055 |
| C21H39NO6  | 1 | [M+K]+     | 440.24280 | 401.27774 | 4.341 |
| C25H41NO3  | 1 | [M-2H+K]-  | 440.25710 | 403.30864 | 0.327 |
| C26H39N3O3 | 1 | [M-H]-     | 440.29360 | 441.29914 | 3.925 |
| C26H45NO2  | 1 | [M-2H+K]-  | 440.29360 | 403.34503 | 0.066 |
| C28H41NO3  | 1 | [M+H]+     | 440.31700 | 439.30864 | 2.451 |
| C27H46FNO  | 1 | [M-2H+Na]- | 440.32990 | 419.35634 | 2.505 |
| C27H47NO2  | 2 | [M+Na]+    | 440.35160 | 417.36068 | 3.858 |
| C26H34O6   | 1 | [M-H]-     | 441.22830 | 442.23554 | 0.066 |
| C25H38O4   | 2 | [M+K]+     | 441.23820 | 402.27701 | 4.444 |
| C21H39O6P  | 4 | [M+Na]+    | 441.23820 | 418.24843 | 1.249 |
| C26H39F3O2 | 5 | [M+H]+     | 441.29800 | 440.29022 | 1.149 |
| C26H42O4   | 5 | [M+Na]+    | 441.29800 | 418.30831 | 1.061 |
| C28H42O4   | 1 | [M-H]-     | 441.30110 | 442.30831 | 0.134 |
| C29H46O3   | 1 | [M-H]-     | 441.33750 | 442.34470 | 0.168 |
| C30H50O2   | 3 | [M-H]-     | 441.37400 | 442.38108 | 0.428 |
| C24H39NO4  | 1 | [M-2H+K]-  | 442.23630 | 405.28791 | 0.473 |
| C25H32O7   | 1 | [M-H]-     | 443.20780 | 444.21481 | 0.596 |
| C27H40O5   | 2 | [M-H]-     | 443.28040 | 444.28758 | 0.212 |
| C28H44O4   | 1 | [M-H]-     | 443.31680 | 444.32396 | 0.246 |
| C27H42N2O3 | 1 | [M+H]+     | 443.32490 | 442.31954 | 4.331 |
| C29H48O3   | 1 | [M-H]-     | 443.35310 | 444.36035 | 0.054 |
| C30H52O2   | 3 | [M-H]-     | 443.38940 | 444.39673 | 0.138 |
| C28H41NO2  | 1 | [M-2H+Na]- | 444.28830 | 423.31373 | 0.200 |
| C25H34O7   | 1 | [M-H]-     | 445.22350 | 446.23046 | 0.705 |
| C27H42O5   | 1 | [M-H]-     | 445.29600 | 446.30323 | 0.099 |
| C28H43FO3  | 1 | [M-H]-     | 445.31130 | 446.31962 | 2.367 |
| C30H46     | 1 | [M+K]+     | 445.32460 | 406.35995 | 3.366 |
| C28H46O4   | 1 | [M-H]-     | 445.33240 | 446.33961 | 0.132 |
| C29H50O3   | 1 | [M-H]-     | 445.36870 | 446.37600 | 0.058 |
| C30H54O2   | 1 | [M-H]-     | 445.40520 | 446.41238 | 0.200 |
| C27H43NO4  | 1 | [M+H]+     | 446.32640 | 445.31921 | 0.193 |
| C26H51NO2  | 1 | [M-2H+K]-  | 446.34030 | 409.39198 | 0.627 |
| C27H44O5   | 1 | [M-H]-     | 447.31180 | 448.31888 | 0.434 |
| C28H45FO3  | 1 | [M-H]-     | 447.32720 | 448.33527 | 1.797 |
| C28H48O4   | 1 | [M-H]-     | 447.34830 | 448.35526 | 0.691 |
| C29H50O3   | 1 | [M+H]+     | 447.38210 | 446.37600 | 2.622 |
| C30H56O2   | 4 | [M-H]-     | 447.42100 | 448.42803 | 0.534 |
| C26H53NO2  | 1 | [M-2H+K]-  | 448.35570 | 411.40763 | 1.182 |
| C19H39O7P  | 1 | [M+K]+     | 449.20720 | 410.24334 | 1.574 |
| C27H38O4   | 1 | [M+Na]+    | 449.26650 | 426.27701 | 0.597 |
| C27H46O5   | 1 | [M-H]-     | 449.32760 | 450.33453 | 0.766 |
| C31H46O2   | 1 | [M-H]-     | 449.34280 | 450.34978 | 0.643 |
| C28H48O4   | 1 | [M+H]+     | 449.36280 | 448.35526 | 0.583 |
| C28H50O4   | 1 | [M-H]-     | 449.36400 | 450.37091 | 0.799 |
| C30H58O2   | 2 | [M-H]-     | 449.43680 | 450.44368 | 0.866 |
| C18H38NO7P | 1 | [M+K]+     | 450.19990 | 411.23859 | 4.091 |
| C21H42NO7P | 1 | [M-H]-     | 450.26270 | 451.26989 | 0.173 |
| C23H43NO5  | 1 | [M-2H+K]-  | 450.26270 | 413.31412 | 0.053 |
| C18H37O9P  | 1 | [M+Na]+    | 451.20880 | 428.21752 | 4.557 |
| C29H40O4   | 1 | [M-H]-     | 451.28560 | 452.29266 | 0.463 |
| C23H44N2O4 | 1 | [M+K]+     | 451.29470 | 412.33011 | 3.195 |
| C30H44O3   | 1 | [M-H]-     | 451.32190 | 452.32905 | 0.275 |

|             |   |            |           |           |       |
|-------------|---|------------|-----------|-----------|-------|
| C27H48O5    | 1 | [M-H]-     | 451.34310 | 452.35018 | 0.430 |
| C31H48O2    | 1 | [M-H]-     | 451.35830 | 452.36543 | 0.308 |
| C28H50O4    | 1 | [M+H]+     | 451.37820 | 450.37091 | 0.027 |
| C30H60O2    | 1 | [M-H]-     | 451.45200 | 452.45933 | 0.135 |
| C31H62O     | 1 | [M+H]+     | 451.48670 | 450.48007 | 1.424 |
| C21H42NO7P  | 3 | [M+H]+     | 452.27790 | 451.26989 | 1.616 |
| C23H43NO5   | 3 | [M+K]+     | 452.27790 | 413.31412 | 1.384 |
| C21H44NO7P  | 1 | [M-H]-     | 452.27830 | 453.28554 | 0.062 |
| C28H38O5    | 1 | [M-H]-     | 453.26500 | 454.27193 | 0.759 |
| C29H42O4    | 2 | [M-H]-     | 453.30140 | 454.30831 | 0.792 |
| C26H46O6    | 1 | [M-H]-     | 453.32240 | 454.32944 | 0.505 |
| C30H46O3    | 2 | [M-H]-     | 453.33770 | 454.34470 | 0.604 |
| C27H48O5    | 1 | [M+H]+     | 453.35780 | 452.35018 | 0.765 |
| C31H50O2    | 2 | [M-H]-     | 453.37400 | 454.38108 | 0.417 |
| C26H43NO3   | 2 | [M-2H+K]-  | 454.27250 | 417.32429 | 0.867 |
| C21H44NO7P  | 5 | [M+H]+     | 454.29310 | 453.28554 | 0.619 |
| C28H48FNO   | 1 | [M-2H+Na]- | 454.34540 | 433.37199 | 2.758 |
| C26H40O4    | 1 | [M+K]+     | 455.25800 | 416.29266 | 4.808 |
| C27H43FO2   | 1 | [M-2H+K]-  | 455.27480 | 418.32471 | 3.275 |
| C28H40O5    | 2 | [M-H]-     | 455.28050 | 456.28758 | 0.426 |
| C27H44O3    | 1 | [M+K]+     | 455.29050 | 416.32905 | 3.725 |
| C29H44O4    | 1 | [M-H]-     | 455.31690 | 456.32396 | 0.459 |
| C30H48O3    | 2 | [M-H]-     | 455.35320 | 456.36035 | 0.272 |
| C31H52O2    | 1 | [M-H]-     | 455.38980 | 456.39673 | 0.744 |
| C18H34NO10P | 1 | [M+H]+     | 456.19810 | 455.19204 | 2.661 |
| C25H41NO4   | 1 | [M-2H+K]-  | 456.25160 | 419.30356 | 1.225 |
| C28H41NO4   | 1 | [M+H]+     | 456.31120 | 455.30356 | 0.798 |
| C26H34O7    | 1 | [M-H]-     | 457.22330 | 458.23046 | 0.249 |
| C27H42F2O2  | 1 | [M-2H+Na]- | 457.29040 | 436.31529 | 0.988 |
| C27H43FO3   | 1 | [M+Na]+    | 457.31070 | 434.31962 | 4.056 |
| C26H42F2O4  | 2 | [M+H]+     | 457.31300 | 456.30512 | 1.323 |
| C29H44O4    | 1 | [M+H]+     | 457.33200 | 456.32396 | 1.666 |
| C29H46O4    | 1 | [M-H]-     | 457.33240 | 458.33961 | 0.129 |
| C30H50O3    | 2 | [M-H]-     | 457.36880 | 458.37600 | 0.162 |
| C25H41NO4   | 3 | [M+K]+     | 458.26500 | 419.30356 | 3.729 |
| C29H43NO2   | 1 | [M-2H+Na]- | 458.30380 | 437.32938 | 0.521 |
| C30H51NO2   | 1 | [M+H]+     | 458.39900 | 457.39198 | 0.561 |
| C27H40O6    | 1 | [M-H]-     | 459.27560 | 460.28249 | 0.825 |
| C28H44O3S   | 1 | [M-H]-     | 459.29450 | 460.30112 | 1.420 |
| C28H44O5    | 1 | [M-H]-     | 459.31180 | 460.31888 | 0.422 |
| C29H48O4    | 1 | [M-H]-     | 459.34830 | 460.35526 | 0.673 |
| C30H52O3    | 1 | [M-H]-     | 459.38470 | 460.39165 | 0.705 |
| C31H64      | 1 | [M+Na]+    | 459.48900 | 436.50080 | 2.224 |
| C21H46NO6P  | 1 | [M-2H+Na]- | 460.28320 | 439.30628 | 4.917 |
| C28H41NO3   | 1 | [M-2H+Na]- | 460.28320 | 439.30864 | 0.226 |
| C21H43O6P   | 1 | [M+K]+     | 461.24270 | 422.27973 | 0.386 |
| C27H42O6    | 1 | [M-H]-     | 461.29100 | 462.29814 | 0.280 |
| C28H46O5    | 1 | [M-H]-     | 461.32750 | 462.33453 | 0.529 |
| C28H44O5    | 1 | [M+H]+     | 461.32780 | 460.31888 | 3.570 |
| C29H50O4    | 2 | [M-H]-     | 461.36380 | 462.37091 | 0.345 |
| C30H62      | 1 | [M+K]+     | 461.44700 | 422.48515 | 2.819 |
| C21H46NO6P  | 2 | [M+Na]+    | 462.29690 | 439.30628 | 3.033 |
| C28H41NO3   | 4 | [M+Na]+    | 462.29690 | 439.30864 | 2.087 |

|             |   |            |           |           |       |
|-------------|---|------------|-----------|-----------|-------|
| C29H36O5    | 1 | [M-H]-     | 463.24950 | 464.25628 | 1.066 |
| C27H42O6    | 1 | [M+H]+     | 463.30420 | 462.29814 | 2.629 |
| C23H46N4O3  | 1 | [M-2H+K]-  | 463.30700 | 426.35699 | 3.041 |
| C27H44O6    | 2 | [M-H]-     | 463.30700 | 464.31379 | 1.034 |
| C31H44O3    | 1 | [M-H]-     | 463.32210 | 464.32905 | 0.699 |
| C28H48O5    | 2 | [M-H]-     | 463.34340 | 464.35018 | 1.066 |
| C25H50O7    | 1 | [M+H]+     | 463.36370 | 462.35566 | 1.655 |
| C31H60O2    | 2 | [M-H]-     | 463.45230 | 464.45933 | 0.516 |
| C28H39N3O3  | 1 | [M-H]-     | 464.29350 | 465.29914 | 3.506 |
| C25H36O8    | 1 | [M+H]+     | 465.24630 | 464.24102 | 4.294 |
| C29H38O5    | 1 | [M-H]-     | 465.26500 | 466.27193 | 0.739 |
| C27H46O6    | 2 | [M-H]-     | 465.32240 | 466.32944 | 0.492 |
| C31H46O3    | 2 | [M-H]-     | 465.33760 | 466.34470 | 0.374 |
| C23H49N2O5P | 1 | [M+H]+     | 465.34490 | 464.33791 | 0.619 |
| C28H48O5    | 1 | [M+H]+     | 465.35750 | 464.35018 | 0.101 |
| C28H50O5    | 2 | [M-H]-     | 465.35880 | 466.36583 | 0.524 |
| C31H62O2    | 2 | [M-H]-     | 465.46780 | 466.47498 | 0.191 |
| C27H43N O3  | 1 | [M-2H+K]-  | 466.27290 | 429.32429 | 0.013 |
| C30H44O4    | 2 | [M-H]-     | 467.31690 | 468.32396 | 0.447 |
| C27H48O6    | 1 | [M-H]-     | 467.33830 | 468.34509 | 1.025 |
| C31H48O3    | 2 | [M-H]-     | 467.35330 | 468.36035 | 0.479 |
| C28H50O5    | 4 | [M+H]+     | 467.37370 | 466.36583 | 1.277 |
| C32H52O2    | 2 | [M-H]-     | 467.38970 | 468.39673 | 0.511 |
| C27H45N O3  | 1 | [M-2H+K]-  | 468.28870 | 431.33994 | 0.333 |
| C21H35O7P   | 1 | [M+K]+     | 469.17390 | 430.21204 | 2.756 |
| C29H42O5    | 1 | [M-H]-     | 469.29610 | 470.30323 | 0.307 |
| C30H46O4    | 4 | [M-H]-     | 469.33230 | 470.33961 | 0.087 |
| C31H50O3    | 4 | [M-H]-     | 469.36880 | 470.37600 | 0.158 |
| C30H54O2    | 1 | [M+Na]+    | 469.39940 | 446.41238 | 4.691 |
| C32H54O2    | 2 | [M-H]-     | 469.40490 | 470.41238 | 0.450 |
| C26H43N O4  | 1 | [M-2H+K]-  | 470.26770 | 433.31921 | 0.232 |
| C24H49N O4S | 1 | [M+Na]+    | 470.32770 | 447.33823 | 0.525 |
| C30H48O4    | 2 | [M-H]-     | 471.34820 | 472.35526 | 0.443 |
| C31H52O3    | 2 | [M-H]-     | 471.38440 | 472.39165 | 0.051 |
| C30H56O2    | 1 | [M+Na]+    | 471.41510 | 448.42803 | 4.565 |
| C32H56O2    | 2 | [M-H]-     | 471.42070 | 472.42803 | 0.129 |
| C27H42F2O3  | 3 | [M-2H+Na]- | 473.28260 | 452.31020 | 4.781 |
| C29H46O5    | 1 | [M-H]-     | 473.32750 | 474.33453 | 0.515 |
| C28H50O3    | 1 | [M+K]+     | 473.33710 | 434.37600 | 4.322 |
| C31H46O2    | 1 | [M+Na]+    | 473.33710 | 450.34978 | 4.018 |
| C30H50O4    | 1 | [M-H]-     | 473.36390 | 474.37091 | 0.547 |
| C30H52N2O2  | 1 | [M+H]+     | 473.41010 | 472.40288 | 0.116 |
| C23H40N O7P | 4 | [M+H]+     | 474.25950 | 473.25424 | 4.257 |
| C21H42N O7P | 2 | [M+Na]+    | 474.25970 | 451.26989 | 1.238 |
| C25H40O4S   | 1 | [M+K]+     | 475.22800 | 436.26473 | 0.246 |
| C28H44O6    | 2 | [M-H]-     | 475.30670 | 476.31379 | 0.377 |
| C29H48O5    | 2 | [M-H]-     | 475.34270 | 476.35018 | 0.433 |
| C21H44N O7P | 1 | [M+Na]+    | 476.27520 | 453.28554 | 0.918 |
| C23H42N O7P | 5 | [M+H]+     | 476.27530 | 475.26989 | 3.924 |
| C29H50O5    | 2 | [M-H]-     | 477.35870 | 478.36583 | 0.302 |
| C30H62O     | 1 | [M+K]+     | 477.44360 | 438.48007 | 0.804 |
| C32H62O2    | 2 | [M-H]-     | 477.46770 | 478.47498 | 0.023 |
| C20H42N O7P | 1 | [M+K]+     | 478.23130 | 439.26989 | 3.643 |

|             |   |            |           |           |       |
|-------------|---|------------|-----------|-----------|-------|
| C23H46NO7P  | 1 | [M-H]-     | 478.29380 | 479.30119 | 0.255 |
| C30H51NO2   | 2 | [M-2H+Na]- | 478.36620 | 457.39198 | 0.920 |
| C27H44O7    | 2 | [M-H]-     | 479.30160 | 480.30871 | 0.342 |
| C31H44O4    | 1 | [M-H]-     | 479.31680 | 480.32396 | 0.227 |
| C28H46O4S   | 1 | [M+H]+     | 479.32110 | 478.31168 | 4.465 |
| C28H48O6    | 2 | [M-H]-     | 479.33820 | 480.34509 | 0.791 |
| C32H48O3    | 1 | [M-H]-     | 479.35330 | 480.36035 | 0.467 |
| C29H50O5    | 2 | [M+H]+     | 479.37410 | 478.36583 | 2.080 |
| C32H56O     | 1 | [M+Na]+    | 479.42090 | 456.43312 | 2.997 |
| C32H64O2    | 2 | [M-H]-     | 479.48360 | 480.49063 | 0.498 |
| C20H25O9S   | 1 | [M+K]+     | 480.08480 | 441.12190 | 0.521 |
| C23H46NO7P  | 2 | [M+H]+     | 480.30900 | 479.30119 | 1.106 |
| C29H36O6    | 1 | [M+H]+     | 481.25900 | 480.25119 | 1.105 |
| C32H50O3    | 1 | [M-H]-     | 481.36890 | 482.37600 | 0.361 |
| C30H58O4    | 2 | [M-H]-     | 481.42620 | 482.43351 | 0.085 |
| C25H39NO6S  | 1 | [M+H]+     | 482.25670 | 481.24981 | 0.807 |
| C30H44O5    | 1 | [M-H]-     | 483.31160 | 484.31888 | 0.012 |
| C31H48O4    | 1 | [M-H]-     | 483.34800 | 484.35526 | 0.019 |
| C30H52O2    | 1 | [M+K]+     | 483.35980 | 444.39673 | 0.168 |
| C27H43NO4   | 1 | [M+K]+     | 484.28180 | 445.31921 | 1.154 |
| C27H45NO4   | 1 | [M-2H+K]-  | 484.28310 | 447.33486 | 0.741 |
| C20H32Br2O2 | 1 | [M+Na]+    | 485.06600 | 462.07690 | 0.249 |
| C28H38O7    | 1 | [M-H]-     | 485.25460 | 486.26176 | 0.235 |
| C29H42O6    | 1 | [M-H]-     | 485.29090 | 486.29814 | 0.060 |
| C31H50O4    | 2 | [M-H]-     | 485.36370 | 486.37091 | 0.122 |
| C32H54O3    | 4 | [M-H]-     | 485.39990 | 486.40730 | 0.260 |
| C33H58O2    | 2 | [M-H]-     | 485.43610 | 486.44368 | 0.641 |
| C22H47N2O5P | 1 | [M-2H+K]-  | 487.26990 | 450.32226 | 1.972 |
| C28H40O7    | 1 | [M-H]-     | 487.26990 | 488.27741 | 0.484 |
| C30H48O5    | 4 | [M-H]-     | 487.34270 | 488.35018 | 0.423 |
| C31H52O4    | 2 | [M-H]-     | 487.37900 | 488.38656 | 0.597 |
| C26H43NO5   | 2 | [M+K]+     | 488.27560 | 449.31412 | 3.428 |
| C22H44NO7P  | 2 | [M+Na]+    | 488.27560 | 465.28554 | 1.714 |
| C27H43ClO3  | 1 | [M+K]+     | 489.25190 | 450.29007 | 2.706 |
| C26H43O4P   | 1 | [M+K]+     | 489.25190 | 450.28990 | 2.346 |
| C24H40O8S   | 1 | [M+H]+     | 489.25190 | 488.24439 | 0.470 |
| C22H47N2O5P | 1 | [M+K]+     | 489.28340 | 450.32226 | 4.110 |
| C28H40O7    | 1 | [M+H]+     | 489.28340 | 488.27741 | 2.622 |
| C29H46O6    | 2 | [M-H]-     | 489.32220 | 490.32944 | 0.059 |
| C30H50O5    | 2 | [M-H]-     | 489.35890 | 490.36583 | 0.703 |
| C31H54O4    | 2 | [M-H]-     | 489.39490 | 490.40221 | 0.084 |
| C30H60O3    | 1 | [M-2H+Na]- | 489.43130 | 468.45425 | 4.891 |
| C31H62O2    | 1 | [M+Na]+    | 489.46270 | 466.47498 | 3.069 |
| C20H21O10S  | 6 | [M-2H+K]-  | 490.03250 | 453.08550 | 3.265 |
| C27H42F2O4  | 1 | [M+Na]+    | 491.29640 | 468.30512 | 4.195 |
| C25H49O7P   | 1 | [M-H]-     | 491.31660 | 492.32159 | 4.635 |
| C33H48O3    | 1 | [M-H]-     | 491.35290 | 492.36035 | 0.358 |
| C30H52O5    | 2 | [M-H]-     | 491.37400 | 492.38148 | 0.419 |
| C31H54O4    | 2 | [M+H]+     | 491.41060 | 490.40221 | 2.263 |
| C33H64O2    | 2 | [M-H]-     | 491.48340 | 492.49063 | 0.079 |
| C20H23O10S  | 4 | [M-2H+K]-  | 492.04840 | 455.10110 | 2.642 |
| C31H42O5    | 1 | [M-H]-     | 493.29590 | 494.30323 | 0.114 |
| C32H46O4    | 1 | [M-H]-     | 493.33260 | 494.33961 | 0.525 |

|             |   |                       |           |           |       |
|-------------|---|-----------------------|-----------|-----------|-------|
| C30H52O5    | 2 | [M+H] <sup>+</sup>    | 493.38880 | 492.38148 | 0.095 |
| C33H66O2    | 2 | [M-H] <sup>-</sup>    | 493.49900 | 494.50628 | 0.022 |
| C25H52NO6P  | 1 | [M+H] <sup>+</sup>    | 494.36230 | 493.35323 | 3.633 |
| C34H56O2    | 1 | [M-H] <sup>-</sup>    | 495.42100 | 496.42803 | 0.482 |
| C23H40NO7P  | 1 | [M+Na] <sup>+</sup>   | 496.24200 | 473.25424 | 2.948 |
| C24H50NO7P  | 2 | [M+H] <sup>+</sup>    | 496.34000 | 495.33249 | 0.465 |
| C30H51NO2   | 1 | [M+K] <sup>+</sup>    | 496.35570 | 457.39198 | 1.148 |
| C26H38N2O3S | 1 | [M+K] <sup>+</sup>    | 497.22550 | 458.26032 | 4.091 |
| C23H47O9P   | 1 | [M-H] <sup>-</sup>    | 497.29080 | 498.29577 | 4.619 |
| C30H42O6    | 1 | [M-H] <sup>-</sup>    | 497.29080 | 498.29814 | 0.143 |
| C24H51O8P   | 1 | [M-H] <sup>-</sup>    | 497.32720 | 498.33216 | 4.649 |
| C32H50O4    | 1 | [M-H] <sup>-</sup>    | 497.36360 | 498.37091 | 0.082 |
| C34H58O2    | 1 | [M-H] <sup>-</sup>    | 497.43620 | 498.44368 | 0.424 |
| C22H44NO9P  | 2 | [M+H] <sup>+</sup>    | 498.28370 | 497.27537 | 2.109 |
| C20H32Br2O2 | 4 | [M-2H+K] <sup>-</sup> | 499.02450 | 462.07690 | 2.004 |
| C26H36O8    | 1 | [M+Na] <sup>+</sup>   | 499.22990 | 476.24102 | 0.685 |
| C25H50O7    | 1 | [M-2H+K] <sup>-</sup> | 499.30650 | 462.35566 | 4.494 |
| C30H44O6    | 1 | [M-H] <sup>-</sup>    | 499.30650 | 500.31379 | 0.042 |
| C35H46O2    | 1 | [M+H] <sup>+</sup>    | 499.35780 | 498.34978 | 1.486 |
| C33H56O3    | 2 | [M-H] <sup>-</sup>    | 499.41570 | 500.42295 | 0.048 |
| C34H60O2    | 1 | [M-H] <sup>-</sup>    | 499.45210 | 500.45933 | 0.078 |
| C34H68      | 1 | [M+Na] <sup>+</sup>   | 499.52380 | 476.53210 | 4.961 |
| C20H32Br2O2 | 3 | [M+K] <sup>+</sup>    | 501.04210 | 462.07690 | 4.091 |
| C15H29O10P3 | 1 | [M+K] <sup>+</sup>    | 501.05910 | 462.09736 | 2.820 |
| C23H49N2O5P | 1 | [M-2H+K] <sup>-</sup> | 501.28570 | 464.33791 | 1.618 |
| C28H46O5    | 1 | [M+K] <sup>+</sup>    | 501.29770 | 462.33453 | 0.048 |
| C32H54O4    | 2 | [M-H] <sup>-</sup>    | 501.39510 | 502.40221 | 0.317 |
| C33H56O3    | 1 | [M+H] <sup>+</sup>    | 501.43120 | 500.42295 | 1.948 |
| C25H44NO7P  | 5 | [M+H] <sup>+</sup>    | 502.29070 | 501.28554 | 4.219 |
| C23H46NO7P  | 3 | [M+Na] <sup>+</sup>   | 502.29070 | 479.30119 | 0.571 |
| C23H51N2O5P | 1 | [M-2H+K] <sup>-</sup> | 503.30130 | 466.35356 | 1.711 |
| C31H52O5    | 2 | [M-H] <sup>-</sup>    | 503.37440 | 504.38148 | 0.385 |
| C22H25O10S  | 1 | [M+Na] <sup>+</sup>   | 504.10700 | 481.11680 | 1.942 |
| C25H39NO6S  | 1 | [M+Na] <sup>+</sup>   | 504.24100 | 481.24981 | 3.901 |
| C22H43O9P   | 1 | [M+Na] <sup>+</sup>   | 505.25360 | 482.26447 | 0.186 |
| C27H34F6O2  | 1 | [M+H] <sup>+</sup>    | 505.25360 | 504.24630 | 0.042 |
| C31H54O5    | 2 | [M-H] <sup>-</sup>    | 505.38960 | 506.39713 | 0.507 |
| C34H66O2    | 2 | [M-H] <sup>-</sup>    | 505.49880 | 506.50628 | 0.417 |
| C20H38NO9P  | 1 | [M+K] <sup>+</sup>    | 506.19360 | 467.22842 | 4.006 |
| C26H45NO5S  | 1 | [M+Na] <sup>+</sup>   | 506.29160 | 483.30185 | 1.051 |
| C27H42F2O4  | 3 | [M+K] <sup>+</sup>    | 507.26980 | 468.30512 | 3.020 |
| C27H36F6O2  | 4 | [M+H] <sup>+</sup>    | 507.27100 | 506.26195 | 3.491 |
| C22H45O9P   | 4 | [M+Na] <sup>+</sup>   | 507.27100 | 484.28012 | 3.265 |
| C24H43O9P   | 4 | [M+H] <sup>+</sup>    | 507.27100 | 506.26447 | 1.478 |
| C29H46O7    | 5 | [M+H] <sup>+</sup>    | 507.33000 | 506.32436 | 3.219 |
| C27H48O7    | 5 | [M+Na] <sup>+</sup>   | 507.33000 | 484.34001 | 1.524 |
| C30H52O6    | 2 | [M-H] <sup>-</sup>    | 507.36850 | 508.37639 | 1.224 |
| C34H68O2    | 2 | [M-H] <sup>-</sup>    | 507.51440 | 508.52193 | 0.514 |
| C25H50NO7P  | 1 | [M+H] <sup>+</sup>    | 508.33730 | 507.33249 | 4.857 |
| C26H47BrO2  | 1 | [M+K] <sup>+</sup>    | 509.24030 | 470.27594 | 2.374 |
| C32H46O5    | 1 | [M-H] <sup>-</sup>    | 509.32670 | 510.33453 | 1.092 |
| C33H50O4    | 1 | [M-H] <sup>-</sup>    | 509.36320 | 510.37091 | 0.866 |
| C30H52O6    | 1 | [M+H] <sup>+</sup>    | 509.38400 | 508.37639 | 0.652 |

|            |   |            |           |           |       |
|------------|---|------------|-----------|-----------|-------|
| C24H49O9P  | 1 | [M-H]-     | 511.30620 | 512.31142 | 4.003 |
| C32H48O5   | 1 | [M-H]-     | 511.34230 | 512.35018 | 1.185 |
| C33H50O4   | 1 | [M+H]+     | 511.37580 | 510.37091 | 4.670 |
| C31H52O4   | 1 | [M+Na]+    | 511.37580 | 488.38656 | 0.035 |
| C31H45NO5  | 2 | [M+H]+     | 512.33500 | 511.32977 | 4.003 |
| C24H50NO8P | 2 | [M+H]+     | 512.33500 | 511.32741 | 0.617 |
| C26H52O7   | 1 | [M-2H+K]-  | 513.32170 | 476.37131 | 3.495 |
| C30H50O3S  | 1 | [M+Na]+    | 513.33810 | 490.34807 | 1.580 |
| C28H46O7   | 1 | [M-2H+Na]- | 515.30130 | 494.32436 | 4.432 |
| C30H44O7   | 1 | [M-H]-     | 515.30130 | 516.30871 | 0.264 |
| C31H48O6   | 1 | [M-H]-     | 515.33730 | 516.34509 | 1.011 |
| C33H56O4   | 2 | [M-H]-     | 515.41020 | 516.41786 | 0.759 |
| C29H40O8   | 1 | [M+H]+     | 517.28010 | 516.27232 | 0.970 |
| C31H48O6   | 1 | [M+H]+     | 517.35060 | 516.34509 | 3.417 |
| C32H54O5   | 1 | [M-H]-     | 517.38990 | 518.39713 | 0.085 |
| C29H36O6   | 1 | [M+K]+     | 519.21440 | 480.25119 | 0.114 |
| C25H44O7P2 | 1 | [M+H]+     | 519.26160 | 518.25623 | 3.674 |
| C27H44O7   | 1 | [M+K]+     | 519.27230 | 480.30871 | 0.855 |
| C24H49O7P  | 1 | [M+K]+     | 519.28250 | 480.32159 | 4.319 |
| C32H64O2   | 1 | [M+K]+     | 519.45410 | 480.49063 | 0.614 |
| C35H68O2   | 1 | [M-H]-     | 519.51450 | 520.52193 | 0.310 |
| C34H50O4   | 1 | [M-H]-     | 521.36290 | 522.37091 | 1.421 |
| C35H70O2   | 1 | [M-H]-     | 521.52970 | 522.53758 | 1.172 |
| C26H52NO7P | 1 | [M+H]+     | 522.35610 | 521.34814 | 1.304 |
| C27H56NO6P | 1 | [M+H]+     | 522.39200 | 521.38453 | 0.375 |
| C26H53O8P  | 1 | [M-H]-     | 523.34270 | 524.34781 | 4.131 |
| C26H54NO7P | 1 | [M+H]+     | 524.37130 | 523.36379 | 0.441 |
| C27H32F6O2 | 1 | [M+Na]+    | 525.21760 | 502.23065 | 4.328 |
| C25H51O9P  | 1 | [M-H]-     | 525.32170 | 526.32707 | 3.611 |
| C26H55O8P  | 1 | [M-H]-     | 525.35840 | 526.36346 | 4.209 |
| C35H58O3   | 1 | [M-H]-     | 525.43060 | 526.43860 | 1.382 |
| C24H48NO9P | 1 | [M+H]+     | 526.31370 | 525.30667 | 0.473 |
| C35H60O3   | 1 | [M-H]-     | 527.44640 | 528.45425 | 1.092 |
| C35H58O3   | 1 | [M+H]+     | 527.44770 | 526.43860 | 3.464 |
| C36H64O2   | 1 | [M-H]-     | 527.48310 | 528.49063 | 0.495 |
| C25H48NO7P | 2 | [M+Na]+    | 528.30660 | 505.31684 | 1.016 |
| C28H42O6S  | 1 | [M+Na]+    | 529.25710 | 506.27021 | 4.410 |
| C28H42O7   | 1 | [M+K]+     | 529.25710 | 490.29306 | 1.689 |
| C32H50O6   | 1 | [M-H]-     | 529.35310 | 530.36074 | 0.701 |
| C35H60O3   | 2 | [M+H]+     | 529.46190 | 528.45425 | 0.712 |
| C35H62O3   | 1 | [M-H]-     | 529.46230 | 530.46990 | 0.616 |
| C34H60O4   | 2 | [M-H]-     | 531.44230 | 532.44916 | 0.770 |
| C33H66O3   | 1 | [M-2H+Na]- | 531.47810 | 510.50120 | 4.222 |
| C25H33ClO8 | 1 | [M-2H+K]-  | 533.13600 | 496.18640 | 1.878 |
| C40H52     | 1 | [M+H]+     | 533.41670 | 532.40690 | 4.728 |
| C31H60O5   | 1 | [M-2H+Na]- | 533.42110 | 512.44408 | 4.432 |
| C34H60O4   | 3 | [M+H]+     | 533.45860 | 532.44916 | 4.053 |
| C36H70O2   | 1 | [M-H]-     | 533.53020 | 534.53758 | 0.208 |
| C32H65NO3  | 1 | [M+Na]+    | 534.48650 | 511.49645 | 1.560 |
| C25H33ClO9 | 1 | [M+Na]+    | 535.17020 | 512.18131 | 0.626 |
| C27H44O8   | 1 | [M+K]+     | 535.26940 | 496.30362 | 4.912 |
| C31H63NO3  | 2 | [M+K]+     | 536.44270 | 497.48080 | 2.321 |
| C28H51BrO2 | 1 | [M+K]+     | 537.27250 | 498.30724 | 3.925 |

|              |   |                        |           |           |       |
|--------------|---|------------------------|-----------|-----------|-------|
| C26H49O9P    | 1 | [M+H] <sup>+</sup>     | 537.32000 | 536.31142 | 2.419 |
| C35H58O4     | 1 | [M-H] <sup>-</sup>     | 541.42620 | 542.43351 | 0.076 |
| C25H46NO7P   | 1 | [M+K] <sup>+</sup>     | 542.26630 | 503.30119 | 3.611 |
| C23H43O12P   | 1 | [M+H] <sup>+</sup>     | 543.25640 | 542.24922 | 0.175 |
| C33H52O6     | 1 | [M-H] <sup>-</sup>     | 543.36850 | 544.37639 | 1.143 |
| C35H60O4     | 1 | [M-H] <sup>-</sup>     | 543.44170 | 544.44916 | 0.351 |
| C27H45O9P    | 1 | [M+H] <sup>+</sup>     | 545.28830 | 544.28012 | 1.651 |
| C33H54O6     | 1 | [M-H] <sup>-</sup>     | 545.38490 | 546.39204 | 0.237 |
| C35H62O4     | 2 | [M-H] <sup>-</sup>     | 545.45780 | 546.46481 | 0.475 |
| C35H60O4     | 4 | [M+H] <sup>+</sup>     | 545.45840 | 544.44916 | 3.597 |
| C34H68O3     | 1 | [M-2H+Na] <sup>-</sup> | 545.49390 | 524.51685 | 4.389 |
| C38H58O2     | 1 | [M+H] <sup>+</sup>     | 547.45190 | 546.44368 | 1.721 |
| C35H62O4     | 5 | [M+H] <sup>+</sup>     | 547.47280 | 546.46481 | 1.301 |
| C35H58O3     | 3 | [M+Na] <sup>+</sup>    | 549.42890 | 526.43860 | 1.971 |
| C36H62O2     | 3 | [M+Na] <sup>+</sup>    | 549.46600 | 526.47498 | 3.272 |
| C33H66O3     | 3 | [M+K] <sup>+</sup>     | 549.46600 | 510.50120 | 3.010 |
| C35H66O4     | 1 | [M-H] <sup>-</sup>     | 549.48850 | 550.49611 | 0.621 |
| C24H31O11S   | 1 | [M+Na] <sup>+</sup>    | 550.14520 | 527.15871 | 4.970 |
| C32H65NO3    | 4 | [M+K] <sup>+</sup>     | 550.46170 | 511.49645 | 3.824 |
| C40H48       | 1 | [M+Na] <sup>+</sup>    | 551.36600 | 528.37560 | 2.137 |
| C36H64O2     | 1 | [M+Na] <sup>+</sup>    | 551.48050 | 528.49063 | 1.175 |
| C38H62O2     | 2 | [M+H] <sup>+</sup>     | 551.48280 | 550.47498 | 0.983 |
| C35H66O4     | 6 | [M+H] <sup>+</sup>     | 551.50420 | 550.49611 | 1.472 |
| C30H42O8     | 1 | [M+Na] <sup>+</sup>    | 553.27620 | 530.28797 | 1.793 |
| C35H62O3     | 3 | [M+Na] <sup>+</sup>    | 553.46030 | 530.46990 | 2.137 |
| C26H46NO7P   | 1 | [M+K] <sup>+</sup>     | 554.26190 | 515.30119 | 4.406 |
| C35H53NO3    | 1 | [M+Na] <sup>+</sup>    | 558.39430 | 535.40255 | 4.538 |
| C25H34O14    | 1 | [M+H] <sup>+</sup>     | 559.20120 | 558.19486 | 1.677 |
| C36H64O4     | 4 | [M-H] <sup>-</sup>     | 559.47310 | 560.48046 | 0.163 |
| C35H49N3O3   | 1 | [M+H] <sup>+</sup>     | 560.38430 | 559.37739 | 0.658 |
| C32H48O8     | 1 | [M+H] <sup>+</sup>     | 561.34440 | 560.33492 | 3.923 |
| C35H62O5     | 2 | [M-H] <sup>-</sup>     | 561.45200 | 562.45973 | 0.812 |
| C36H64O4     | 6 | [M+H] <sup>+</sup>     | 561.48860 | 560.48046 | 1.535 |
| C26H54NO8P   | 1 | [M+Na] <sup>+</sup>    | 562.35070 | 539.35871 | 4.929 |
| C33H54O7     | 1 | [M+H] <sup>+</sup>     | 563.39300 | 562.38696 | 2.189 |
| C35H62O5     | 4 | [M+H] <sup>+</sup>     | 563.46780 | 562.45973 | 1.414 |
| C34H68O3     | 2 | [M+K] <sup>+</sup>     | 563.48150 | 524.51685 | 2.669 |
| C26H45NO8S2  | 1 | [M+H] <sup>+</sup>     | 564.26830 | 563.25867 | 4.179 |
| C24H48NO9P   | 4 | [M+K] <sup>+</sup>     | 564.26830 | 525.30667 | 2.697 |
| C28H48NO7P   | 1 | [M+Na] <sup>+</sup>    | 564.30730 | 541.31684 | 2.192 |
| C29H51NO6S   | 1 | [M+Na] <sup>+</sup>    | 564.33490 | 541.34371 | 3.486 |
| C28H54NO8P   | 1 | [M+H] <sup>+</sup>     | 564.36650 | 563.35871 | 0.914 |
| C33H67NO3    | 2 | [M+K] <sup>+</sup>     | 564.47600 | 525.51210 | 1.338 |
| C40H52O2     | 1 | [M+H] <sup>+</sup>     | 565.40270 | 564.39673 | 2.313 |
| C35H58O3     | 1 | [M+K] <sup>+</sup>     | 565.40270 | 526.43860 | 1.687 |
| C35H64O5     | 5 | [M+H] <sup>+</sup>     | 565.48360 | 564.47538 | 1.675 |
| C35H66O5     | 1 | [M+H] <sup>+</sup>     | 567.50000 | 566.49103 | 2.990 |
| C37H74O3     | 1 | [M+H] <sup>+</sup>     | 567.57340 | 566.56380 | 4.100 |
| C26H43NO8S   | 1 | [M+K] <sup>+</sup>     | 568.23350 | 529.27094 | 1.042 |
| C25H48N2O8PS | 2 | [M+H] <sup>+</sup>     | 568.29320 | 567.28690 | 1.719 |
| C22H43O12P   | 1 | [M+K] <sup>+</sup>     | 569.21450 | 530.24922 | 3.746 |
| C40H50       | 1 | [M+K] <sup>+</sup>     | 569.35690 | 530.39125 | 4.389 |
| C33H56O6     | 1 | [M-2H+Na] <sup>-</sup> | 569.38420 | 548.40769 | 3.247 |



|             |   |                        |           |           |       |
|-------------|---|------------------------|-----------|-----------|-------|
| C35H71NO4   | 1 | [M+H] <sup>+</sup>     | 570.54410 | 569.53831 | 2.606 |
| C40H58O2    | 1 | [M+H] <sup>+</sup>     | 571.45050 | 570.44368 | 0.801 |
| C37H72O2    | 1 | [M+Na] <sup>+</sup>    | 571.54400 | 548.55323 | 2.708 |
| C35H58O6    | 1 | [M-H] <sup>-</sup>     | 573.41580 | 574.42334 | 0.473 |
| C36H70O2    | 1 | [M+K] <sup>+</sup>     | 573.50000 | 534.53758 | 1.275 |
| C37H74O2    | 1 | [M+Na] <sup>+</sup>    | 573.56070 | 550.56888 | 4.530 |
| C26H50NO9P  | 1 | [M+Na] <sup>+</sup>    | 574.31440 | 551.32232 | 4.975 |
| C28H48NO9P  | 1 | [M+H] <sup>+</sup>     | 574.31440 | 573.30667 | 0.785 |
| C32H63NO5S  | 1 | [M+H] <sup>+</sup>     | 574.44780 | 573.44270 | 3.784 |
| C32H46O9    | 1 | [M+H] <sup>+</sup>     | 575.32190 | 574.31419 | 0.760 |
| C40H62O2    | 1 | [M+H] <sup>+</sup>     | 575.48040 | 574.47498 | 3.229 |
| C38H64O2    | 1 | [M+Na] <sup>+</sup>    | 575.48040 | 552.49063 | 0.952 |
| C36H72O2    | 3 | [M+K] <sup>+</sup>     | 575.51700 | 536.55323 | 1.076 |
| C34H67NO3   | 1 | [M+K] <sup>+</sup>     | 576.47520 | 537.51210 | 0.078 |
| C35H71NO3   | 1 | [M+Na] <sup>+</sup>    | 576.53070 | 553.54340 | 3.323 |
| C30H57O8P   | 1 | [M+H] <sup>+</sup>     | 577.38420 | 576.37911 | 3.786 |
| C33H62O6    | 1 | [M+Na] <sup>+</sup>    | 577.44600 | 554.45464 | 3.703 |
| C35H60O6    | 1 | [M+H] <sup>+</sup>     | 577.44600 | 576.43899 | 0.464 |
| C32H64O8    | 1 | [M+H] <sup>+</sup>     | 577.46690 | 576.46012 | 0.862 |
| C36H64O5    | 3 | [M+H] <sup>+</sup>     | 577.48390 | 576.47538 | 2.159 |
| C38H66O2    | 3 | [M+Na] <sup>+</sup>    | 577.49630 | 554.50628 | 1.382 |
| C29H56NO8P  | 1 | [M+H] <sup>+</sup>     | 578.38220 | 577.37436 | 0.979 |
| C29H58NO8P  | 1 | [M-H] <sup>-</sup>     | 578.38300 | 579.39001 | 0.455 |
| C35H63NO5   | 1 | [M+H] <sup>+</sup>     | 578.48040 | 577.47063 | 4.318 |
| C34H69NO3   | 2 | [M+K] <sup>+</sup>     | 578.49040 | 539.52775 | 0.856 |
| C34H69NO4   | 3 | [M+Na] <sup>+</sup>    | 578.51120 | 555.52266 | 1.177 |
| C27H37ClO9  | 1 | [M+K] <sup>+</sup>     | 579.17360 | 540.21261 | 3.736 |
| C40H60      | 1 | [M+K] <sup>+</sup>     | 579.43070 | 540.46950 | 3.367 |
| C31H63O7P   | 1 | [M+H] <sup>+</sup>     | 579.43750 | 578.43114 | 1.589 |
| C36H66O5    | 1 | [M+H] <sup>+</sup>     | 579.49880 | 578.49103 | 0.858 |
| C38H68O2    | 1 | [M+Na] <sup>+</sup>    | 579.51270 | 556.52193 | 2.671 |
| C36H62O3    | 1 | [M+K] <sup>+</sup>     | 581.43050 | 542.46990 | 4.379 |
| C35H63NO4   | 1 | [M+Na] <sup>+</sup>    | 584.46390 | 561.47571 | 1.764 |
| C32H40O10   | 1 | [M+H] <sup>+</sup>     | 585.27140 | 584.26215 | 3.369 |
| C32H50O7    | 1 | [M+K] <sup>+</sup>     | 585.32110 | 546.35566 | 3.919 |
| C35H62O5    | 1 | [M+Na] <sup>+</sup>    | 585.45120 | 562.45973 | 3.848 |
| C35H64O5    | 1 | [M-2H+Na] <sup>-</sup> | 585.45170 | 564.47538 | 2.842 |
| C28H53O9P   | 4 | [M+Na] <sup>+</sup>    | 587.33040 | 564.34272 | 2.629 |
| C40H68      | 1 | [M+K] <sup>+</sup>     | 587.49370 | 548.53210 | 2.640 |
| C38H76O2    | 2 | [M+Na] <sup>+</sup>    | 587.57160 | 564.58453 | 3.663 |
| C28H56NO8P  | 2 | [M+Na] <sup>+</sup>    | 588.36180 | 565.37436 | 3.022 |
| C29H60NO7P  | 1 | [M+Na] <sup>+</sup>    | 588.40190 | 565.41074 | 3.292 |
| C28H55O8P   | 1 | [M+K] <sup>+</sup>     | 589.32610 | 550.36346 | 0.864 |
| C34H52O8    | 1 | [M+H] <sup>+</sup>     | 589.37620 | 588.36622 | 4.585 |
| C35H66O5    | 4 | [M+Na] <sup>+</sup>    | 589.48020 | 566.49103 | 0.080 |
| C37H64O5    | 5 | [M+H] <sup>+</sup>     | 589.48030 | 588.47538 | 3.992 |
| C30H47O10   | 1 | [M+Na] <sup>+</sup>    | 590.30820 | 567.31693 | 3.478 |
| C26H50NO10P | 2 | [M+Na] <sup>+</sup>    | 590.30930 | 567.31724 | 4.814 |
| C29H62NO6P  | 1 | [M+K] <sup>+</sup>     | 590.39660 | 551.43148 | 3.342 |
| C24H40O10S2 | 1 | [M+K] <sup>+</sup>     | 591.16880 | 552.20630 | 1.093 |
| C30H48O10   | 2 | [M+Na] <sup>+</sup>    | 591.31220 | 568.32475 | 2.997 |
| C38H64O2    | 1 | [M+K] <sup>+</sup>     | 591.45320 | 552.49063 | 0.982 |
| C41H60O     | 1 | [M+Na] <sup>+</sup>    | 591.45320 | 568.46442 | 0.739 |

|               |   |            |           |           |       |
|---------------|---|------------|-----------|-----------|-------|
| C35H68O5      | 2 | [M+Na]+    | 591.49880 | 568.50668 | 4.908 |
| C37H66O5      | 5 | [M+H]+     | 591.49930 | 590.49103 | 1.686 |
| C40H72        | 1 | [M+K]+     | 591.52720 | 552.56340 | 1.097 |
| C26H52NO9P    | 1 | [M+K]+     | 592.30020 | 553.33797 | 1.557 |
| C30H58NO8P    | 5 | [M+H]+     | 592.39880 | 591.39001 | 2.559 |
| C35H71NO3     | 1 | [M+K]+     | 592.50460 | 553.54340 | 3.283 |
| C27H55O9P     | 1 | [M+K]+     | 593.32000 | 554.35837 | 2.569 |
| C40H48O4      | 1 | [M+H]+     | 593.36420 | 592.35526 | 2.801 |
| C34H56O8      | 1 | [M+H]+     | 593.40250 | 592.39752 | 3.873 |
| C31H61O8P     | 1 | [M+H]+     | 593.41970 | 592.41041 | 3.394 |
| C37H68O5      | 4 | [M+H]+     | 593.51490 | 592.50668 | 1.596 |
| C40H74        | 1 | [M+K]+     | 593.54210 | 554.57905 | 0.170 |
| C29H56NO9P    | 1 | [M+H]+     | 594.37730 | 593.36927 | 1.264 |
| C37H70O5      | 2 | [M+H]+     | 595.52960 | 594.52233 | 0.005 |
| C28H48NO9P    | 1 | [M+Na]+    | 596.29380 | 573.30667 | 3.510 |
| C33H57NO8     | 1 | [M+H]+     | 596.41390 | 595.40842 | 3.013 |
| C27H49O12P    | 1 | [M+H]+     | 597.30150 | 596.29617 | 3.256 |
| C35H60O6      | 1 | [M-2H+Na]- | 597.41610 | 576.43899 | 4.099 |
| C36H64O5      | 1 | [M-2H+Na]- | 597.45070 | 576.47538 | 1.111 |
| C29H39ClO11   | 1 | [M+H]+     | 599.22710 | 598.21809 | 2.885 |
| C27H44O11S    | 1 | [M+Na]+    | 599.25200 | 576.26044 | 3.907 |
| C32H48O8      | 1 | [M+K]+     | 599.29790 | 560.33492 | 0.285 |
| C35H60O6      | 1 | [M+Na]+    | 599.43030 | 576.43899 | 3.483 |
| C36H66O5      | 1 | [M-2H+Na]- | 599.46740 | 578.49103 | 2.859 |
| C38H64O5      | 1 | [M-H]-     | 599.46740 | 600.47538 | 1.178 |
| C29H56NO8P    | 1 | [M+Na]+    | 600.36460 | 577.37436 | 1.702 |
| C34H65NO5S    | 1 | [M+H]+     | 600.46370 | 599.45835 | 3.204 |
| C36H67NO3     | 1 | [M+K]+     | 600.47290 | 561.51210 | 3.905 |
| C39H78O2      | 2 | [M+Na]+    | 601.58900 | 578.60018 | 0.668 |
| C28H54NO9P    | 3 | [M+Na]+    | 602.34360 | 579.35362 | 1.257 |
| C29H58NO8P    | 2 | [M+Na]+    | 602.38080 | 579.39001 | 2.610 |
| C34H67NO5S    | 1 | [M+H]+     | 602.47920 | 601.47400 | 3.442 |
| C37H73NO3     | 1 | [M+Na]+    | 602.54930 | 579.55905 | 1.716 |
| C38H66O5      | 3 | [M+H]+     | 603.49700 | 602.49103 | 2.159 |
| C36H68O5      | 2 | [M+Na]+    | 603.49700 | 580.50668 | 1.828 |
| C37H72O4      | 1 | [M+Na]+    | 603.53520 | 580.54306 | 4.835 |
| C39H70O4      | 6 | [M+H]+     | 603.53550 | 602.52741 | 1.345 |
| C38H76O2      | 1 | [M+K]+     | 603.54940 | 564.58453 | 2.848 |
| C36H71NO3     | 1 | [M+K]+     | 604.50610 | 565.54340 | 0.736 |
| C33H65O7P     | 2 | [M+H]+     | 605.45310 | 604.44679 | 1.604 |
| C17H27N3O17P2 | 3 | [M-H]-     | 606.07590 | 607.08158 | 2.628 |
| C27H54NO9P    | 1 | [M+K]+     | 606.31390 | 567.35362 | 4.737 |
| C31H60NO8P    | 1 | [M+H]+     | 606.41270 | 605.40566 | 0.386 |
| C34H48O7      | 1 | [M+K]+     | 607.30140 | 568.34001 | 2.891 |
| C27H53O11P    | 1 | [M+Na]+    | 607.31990 | 584.33255 | 3.087 |
| C32H44F6O4    | 1 | [M+H]+     | 607.31990 | 606.31438 | 2.896 |
| C28H57O9P     | 1 | [M+K]+     | 607.33430 | 568.37402 | 4.732 |
| C40H56O2      | 4 | [M+K]+     | 607.39260 | 568.42803 | 2.336 |
| C38H70O5      | 1 | [M+H]+     | 607.52960 | 606.52233 | 0.005 |
| C17H27N3O17P2 | 1 | [M+H]+     | 608.09180 | 607.08158 | 4.845 |
| C29H47O10P    | 1 | [M+Na]+    | 609.27990 | 586.29069 | 0.015 |
| C30H52O7P2    | 1 | [M+Na]+    | 609.30710 | 586.31883 | 1.562 |
| C34H56O9      | 4 | [M+H]+     | 609.39680 | 608.39244 | 4.780 |

|             |   |            |           |           |       |
|-------------|---|------------|-----------|-----------|-------|
| C37H64O5    | 1 | [M-2H+Na]- | 609.45220 | 588.47538 | 3.551 |
| C42H72O2    | 2 | [M+H]+     | 609.56090 | 608.55323 | 0.643 |
| C29H56NO10P | 1 | [M+H]+     | 610.37080 | 609.36419 | 1.088 |
| C30H53O8P   | 1 | [M+K]+     | 611.30990 | 572.34781 | 1.731 |
| C31H57O8P   | 1 | [M+Na]+    | 611.37060 | 588.37911 | 3.713 |
| C30H59O10P  | 1 | [M+H]+     | 611.39090 | 610.38459 | 1.580 |
| C34H58O9    | 1 | [M+H]+     | 611.41820 | 610.40809 | 4.640 |
| C37H66O5    | 1 | [M-2H+Na]- | 611.46780 | 590.49103 | 3.457 |
| C39H64O5    | 1 | [M-H]-     | 611.46780 | 612.47538 | 0.500 |
| C29H57O11P  | 2 | [M+H]+     | 613.36840 | 612.36385 | 4.452 |
| C39H64O5    | 1 | [M+H]+     | 613.48150 | 612.47538 | 1.879 |
| C37H68O5    | 1 | [M-2H+Na]- | 613.48340 | 592.50668 | 3.364 |
| C39H66O5    | 1 | [M-H]-     | 613.48340 | 614.49103 | 0.580 |
| C40H78O2    | 4 | [M+Na]+    | 613.58670 | 590.60018 | 4.404 |
| C31H61O7P   | 1 | [M+K]+     | 615.38150 | 576.41549 | 4.641 |
| C31H61O8P   | 2 | [M+Na]+    | 615.39740 | 592.41041 | 3.624 |
| C35H60O6    | 1 | [M+K]+     | 615.40000 | 576.43899 | 3.479 |
| C33H59O8P   | 1 | [M+H]+     | 615.40000 | 614.39476 | 3.308 |
| C32H64O8    | 1 | [M+K]+     | 615.42060 | 576.46012 | 4.340 |
| C37H68O5    | 2 | [M+Na]+    | 615.49740 | 592.50668 | 2.442 |
| C39H66O5    | 4 | [M+H]+     | 615.49740 | 614.49103 | 1.467 |
| C40H80O2    | 3 | [M+Na]+    | 615.60270 | 592.61583 | 3.821 |
| C29H56NO9P  | 2 | [M+Na]+    | 616.35980 | 593.36927 | 2.121 |
| C30H60NO8P  | 2 | [M+Na]+    | 616.39630 | 593.40566 | 2.307 |
| C33H63O8P   | 1 | [M-H]-     | 617.41850 | 618.42606 | 0.468 |
| C37H70O5    | 4 | [M+Na]+    | 617.51110 | 594.52233 | 0.724 |
| C39H68O5    | 6 | [M+H]+     | 617.51490 | 616.50668 | 1.534 |
| C40H72O4    | 3 | [M+H]+     | 617.55080 | 616.54306 | 0.748 |
| C40H82O2    | 2 | [M+Na]+    | 617.61810 | 594.63148 | 4.213 |
| C40H52O4    | 1 | [M+Na]+    | 619.37680 | 596.38656 | 1.644 |
| C33H56O9    | 1 | [M+Na]+    | 619.38470 | 596.39244 | 4.913 |
| C35H54O9    | 2 | [M+H]+     | 619.38580 | 618.37679 | 2.804 |
| C33H65O8P   | 1 | [M-H]-     | 619.43480 | 620.44171 | 0.583 |
| C37H72O5    | 1 | [M+Na]+    | 619.53010 | 596.53798 | 4.686 |
| C39H70O5    | 2 | [M+H]+     | 619.53150 | 618.52233 | 3.062 |
| C28H56NO9P  | 1 | [M+K]+     | 620.33040 | 581.36927 | 3.260 |
| C32H62NO8P  | 3 | [M+H]+     | 620.43030 | 619.42131 | 2.766 |
| C40H54O4    | 1 | [M+Na]+    | 621.39280 | 598.40221 | 2.202 |
| C30H58NO10P | 1 | [M-H]-     | 622.37220 | 623.37984 | 0.590 |
| C27H36O15   | 1 | [M+Na]+    | 623.19340 | 600.20543 | 2.001 |
| C29H51O12P  | 1 | [M+H]+     | 623.32170 | 622.31182 | 4.179 |
| C41H60O2    | 1 | [M+K]+     | 623.42520 | 584.45933 | 4.361 |
| C30H58NO10P | 2 | [M+H]+     | 624.38930 | 623.37984 | 3.501 |
| C38H68O5    | 1 | [M-2H+Na]- | 625.48410 | 604.50668 | 4.419 |
| C40H66O5    | 4 | [M-H]-     | 625.48410 | 626.49103 | 0.550 |
| C40H74O3    | 2 | [M+Na]+    | 625.55100 | 602.56380 | 3.224 |
| C39H76O5    | 1 | [M+H]+     | 625.57820 | 624.56928 | 2.633 |
| C29H55O12P  | 3 | [M+H]+     | 627.35070 | 626.34312 | 0.485 |
| C34H68O8    | 1 | [M+Na]+    | 627.48220 | 604.49142 | 2.483 |
| C38H68O5    | 1 | [M+Na]+    | 627.49500 | 604.50668 | 1.429 |
| C38H70O5    | 1 | [M-2H+Na]- | 627.49980 | 606.52233 | 4.484 |
| C40H68O5    | 1 | [M-H]-     | 627.49980 | 628.50668 | 0.628 |
| C31H59O8P   | 1 | [M+K]+     | 629.35750 | 590.39476 | 0.650 |

|               |   |            |           |           |       |
|---------------|---|------------|-----------|-----------|-------|
| C31H62NO8P    | 4 | [M+Na]+    | 630.41250 | 607.42131 | 3.128 |
| C34H56O9      | 1 | [M+Na]+    | 631.38060 | 608.39244 | 1.674 |
| C40H80O3      | 3 | [M+Na]+    | 631.59720 | 608.61075 | 4.381 |
| C33H62NO8P    | 1 | [M+H]+     | 632.42880 | 631.42131 | 0.342 |
| C32H68NO6P    | 1 | [M+K]+     | 632.44460 | 593.47843 | 4.780 |
| C36H56O9      | 1 | [M+H]+     | 633.40130 | 632.39244 | 2.506 |
| C34H65O8P     | 1 | [M+H]+     | 633.44650 | 632.44171 | 3.925 |
| C37H64N2O6    | 1 | [M+H]+     | 633.48530 | 632.47644 | 2.500 |
| C35H69O7P     | 1 | [M+H]+     | 633.48530 | 632.47809 | 0.112 |
| C33H66NO8P    | 1 | [M-H]-     | 634.44530 | 635.45261 | 0.058 |
| C33H64NO8P    | 3 | [M+H]+     | 634.44610 | 633.43696 | 2.941 |
| C44H74O2      | 1 | [M+H]+     | 635.57720 | 634.56888 | 1.639 |
| C33H66NO8P    | 6 | [M+H]+     | 636.45890 | 635.45261 | 1.546 |
| C29H39ClO11   | 1 | [M+K]+     | 637.18080 | 598.21809 | 0.697 |
| C33H58O10     | 1 | [M+Na]+    | 637.39410 | 614.40300 | 2.946 |
| C42H84O3      | 1 | [M+H]+     | 637.65220 | 636.64205 | 4.512 |
| C27H36O15     | 2 | [M+K]+     | 639.16660 | 600.20543 | 3.092 |
| C27H53O12P    | 1 | [M+K]+     | 639.29350 | 600.32747 | 4.507 |
| C34H69N2O5P   | 1 | [M+Na]+    | 639.48120 | 616.49441 | 3.803 |
| C41H66O5      | 1 | [M+H]+     | 639.49720 | 638.49103 | 1.725 |
| C38H74N2O5    | 1 | [M+H]+     | 639.56410 | 638.55977 | 4.614 |
| C35H54O9      | 1 | [M+Na]+    | 641.36390 | 618.37679 | 3.285 |
| C35H61O8P     | 6 | [M+H]+     | 641.41500 | 640.41041 | 4.188 |
| C33H63O8P     | 6 | [M+Na]+    | 641.41500 | 618.42606 | 0.437 |
| C34H66O8      | 1 | [M+K]+     | 641.43820 | 602.47577 | 1.124 |
| C34H67O7P     | 1 | [M+Na]+    | 641.45350 | 618.46244 | 2.861 |
| C41H68O5      | 1 | [M+H]+     | 641.51240 | 640.50668 | 2.421 |
| C39H70O5      | 1 | [M+Na]+    | 641.51240 | 618.52233 | 1.330 |
| C42H82O2      | 2 | [M+Na]+    | 641.61770 | 618.63148 | 4.679 |
| C34H70NO6P    | 1 | [M+Na]+    | 642.48220 | 619.49408 | 1.709 |
| C29H49O12P    | 2 | [M+Na]+    | 643.28680 | 620.29617 | 2.193 |
| C33H65O7P     | 1 | [M+K]+     | 643.40740 | 604.44679 | 3.954 |
| C35H63O8P     | 6 | [M+H]+     | 643.43030 | 642.42606 | 4.718 |
| C33H65O8P     | 6 | [M+Na]+    | 643.43030 | 620.44171 | 0.979 |
| C35H65O8P     | 1 | [M-H]-     | 643.43530 | 644.44171 | 1.338 |
| C41H70O5      | 1 | [M+H]+     | 643.52730 | 642.52233 | 3.579 |
| C39H72O5      | 1 | [M+Na]+    | 643.52730 | 620.53798 | 0.160 |
| C42H84O2      | 3 | [M+Na]+    | 643.63500 | 620.64713 | 2.101 |
| C32H64NO8P    | 1 | [M+Na]+    | 644.42510 | 621.43696 | 1.673 |
| C36H69NO8     | 1 | [M+H]+     | 644.50890 | 643.50232 | 1.081 |
| C35H67O8P     | 2 | [M-H]-     | 645.44860 | 646.45736 | 2.307 |
| C40H64O5      | 2 | [M-2H+Na]- | 645.44860 | 624.47538 | 2.225 |
| C17H27N3O17P2 | 1 | [M+K]+     | 646.04790 | 607.08158 | 4.911 |
| C30H58NO10P   | 4 | [M+Na]+    | 646.36980 | 623.37984 | 1.148 |
| C34H64NO8P    | 2 | [M+H]+     | 646.44240 | 645.43696 | 2.837 |
| C29H53O12P    | 1 | [M+Na]+    | 647.31590 | 624.32747 | 1.220 |
| C35H69O8P     | 1 | [M-H]-     | 647.46610 | 648.47301 | 0.558 |
| C30H47N3O9S   | 1 | [M+Na]+    | 648.29170 | 625.30331 | 1.274 |
| C29H55O12P    | 1 | [M+Na]+    | 649.33380 | 626.34312 | 2.248 |
| C31H53O12P    | 1 | [M+H]+     | 649.33380 | 648.32747 | 1.457 |
| C34H58O9      | 1 | [M+K]+     | 649.37300 | 610.40809 | 2.716 |
| C34H59O8P     | 1 | [M+Na]+    | 649.38440 | 626.39476 | 0.647 |
| C38H74O5      | 1 | [M+K]+     | 649.51490 | 610.55363 | 2.888 |

|             |   |                        |           |           |       |
|-------------|---|------------------------|-----------|-----------|-------|
| C36H73O7P   | 1 | [M+H] <sup>+</sup>     | 649.51490 | 648.50939 | 2.727 |
| C32H60NO10P | 1 | [M+H] <sup>+</sup>     | 650.40340 | 649.39549 | 0.978 |
| C34H68NO8P  | 1 | [M+H] <sup>+</sup>     | 650.47600 | 649.46826 | 0.716 |
| C42H82O4    | 1 | [M+H] <sup>+</sup>     | 651.62580 | 650.62131 | 4.279 |
| C32H62NO10P | 2 | [M+H] <sup>+</sup>     | 652.42120 | 651.41114 | 4.270 |
| C33H59O8P   | 2 | [M+K] <sup>+</sup>     | 653.36060 | 614.39476 | 4.119 |
| C40H54O5    | 1 | [M+K] <sup>+</sup>     | 653.36060 | 614.39713 | 0.496 |
| C40H72O5    | 1 | [M-2H+Na] <sup>-</sup> | 653.51500 | 632.53798 | 3.617 |
| C42H70O5    | 1 | [M-H] <sup>-</sup>     | 653.51500 | 654.52233 | 0.086 |
| C31H59O12P  | 1 | [M+H] <sup>+</sup>     | 655.38140 | 654.37442 | 0.452 |
| C36H56O9    | 1 | [M+Na] <sup>+</sup>    | 655.38140 | 632.39244 | 0.392 |
| C36H63O8P   | 4 | [M+H] <sup>+</sup>     | 655.43050 | 654.42606 | 4.327 |
| C34H65O8P   | 4 | [M+Na] <sup>+</sup>    | 655.43100 | 632.44171 | 0.107 |
| C40H72O5    | 1 | [M+Na] <sup>+</sup>    | 655.52440 | 632.53798 | 4.267 |
| C33H64NO8P  | 3 | [M+Na] <sup>+</sup>    | 656.42800 | 633.43696 | 2.776 |
| C35H62NO8P  | 5 | [M+H] <sup>+</sup>     | 656.42800 | 655.42131 | 0.890 |
| C34H68NO7P  | 1 | [M+Na] <sup>+</sup>    | 656.46460 | 633.47334 | 3.103 |
| C27H44O14S2 | 1 | [M+H] <sup>+</sup>     | 657.22590 | 656.21726 | 2.080 |
| C34H67O7P   | 2 | [M+K] <sup>+</sup>     | 657.42330 | 618.46244 | 3.489 |
| C35H71O7P   | 1 | [M+Na] <sup>+</sup>    | 657.48210 | 634.49374 | 1.316 |
| C40H74O5    | 1 | [M+Na] <sup>+</sup>    | 657.53980 | 634.55363 | 4.634 |
| C35H64NO8P  | 5 | [M+H] <sup>+</sup>     | 658.44330 | 657.43696 | 1.418 |
| C35H74NO6P  | 1 | [M+Na] <sup>+</sup>    | 658.51270 | 635.52538 | 2.884 |
| C32H61O10P  | 1 | [M+Na] <sup>+</sup>    | 659.38750 | 636.40024 | 2.972 |
| C41H64O4    | 5 | [M+K] <sup>+</sup>     | 659.44590 | 620.48046 | 3.471 |
| C43H64O5    | 1 | [M-H] <sup>-</sup>     | 659.46590 | 660.47538 | 3.345 |
| C41H66O5    | 1 | [M-2H+Na] <sup>-</sup> | 659.46590 | 638.49103 | 0.325 |
| C36H69O8P   | 1 | [M-H] <sup>-</sup>     | 659.46590 | 660.47301 | 0.244 |
| C42H84O3    | 3 | [M+Na] <sup>+</sup>    | 659.62870 | 636.64205 | 3.892 |
| C35H66NO8P  | 2 | [M+H] <sup>+</sup>     | 660.46030 | 659.45261 | 0.630 |
| C35H68NO8P  | 1 | [M-H] <sup>-</sup>     | 660.46110 | 661.46826 | 0.171 |
| C34H72NO6P  | 1 | [M+K] <sup>+</sup>     | 660.47310 | 621.50973 | 0.338 |
| C43H74O2    | 1 | [M+K] <sup>+</sup>     | 661.53460 | 622.56888 | 3.883 |
| C39H74O6    | 2 | [M+Na] <sup>+</sup>    | 661.53600 | 638.54854 | 2.663 |
| C40H78O5    | 1 | [M+Na] <sup>+</sup>    | 661.57150 | 638.58493 | 4.001 |
| C46H76O2    | 1 | [M+H] <sup>+</sup>     | 661.59030 | 660.58453 | 2.279 |
| C44H78O2    | 1 | [M+Na] <sup>+</sup>    | 661.59030 | 638.60018 | 1.357 |
| C35H67NO8S  | 2 | [M+H] <sup>+</sup>     | 662.46470 | 661.45874 | 1.991 |
| C37H71NO6   | 1 | [M-2H+K] <sup>-</sup>  | 662.47640 | 625.52814 | 0.513 |
| C35H70NO8P  | 1 | [M-H] <sup>-</sup>     | 662.47640 | 663.48391 | 0.358 |
| C35H68NO8P  | 5 | [M+H] <sup>+</sup>     | 662.47710 | 661.46826 | 2.364 |
| C36H72NO7P  | 1 | [M+H] <sup>+</sup>     | 662.50920 | 661.50464 | 4.104 |
| C31H61O10P  | 1 | [M+K] <sup>+</sup>     | 663.36100 | 624.40024 | 3.601 |
| C34H63O10P  | 1 | [M+H] <sup>+</sup>     | 663.42540 | 662.41589 | 3.367 |
| C40H64O5    | 1 | [M+K] <sup>+</sup>     | 663.44080 | 624.47538 | 3.428 |
| C32H51NO11  | 1 | [M+K] <sup>+</sup>     | 664.31120 | 625.34622 | 2.762 |
| C32H51NO12  | 1 | [M+Na] <sup>+</sup>    | 664.32970 | 641.34113 | 0.980 |
| C33H62NO10P | 1 | [M+H] <sup>+</sup>     | 664.42140 | 663.41114 | 4.494 |
| C34H66NO9P  | 4 | [M+H] <sup>+</sup>     | 664.45740 | 663.44752 | 3.914 |
| C35H70NO8P  | 6 | [M+H] <sup>+</sup>     | 664.49430 | 663.48391 | 4.689 |
| C37H71NO6   | 6 | [M+K] <sup>+</sup>     | 664.49430 | 625.52814 | 4.530 |
| C36H74NO7P  | 1 | [M+H] <sup>+</sup>     | 664.52600 | 663.52029 | 2.363 |
| C41H71NO4   | 1 | [M+Na] <sup>+</sup>    | 664.52600 | 641.53831 | 2.304 |

|             |   |                        |           |           |       |
|-------------|---|------------------------|-----------|-----------|-------|
| C43H68O5    | 1 | [M+H] <sup>+</sup>     | 665.51150 | 664.50668 | 3.686 |
| C41H70O5    | 1 | [M+Na] <sup>+</sup>    | 665.51150 | 642.52233 | 0.071 |
| C33H64NO10P | 1 | [M+H] <sup>+</sup>     | 666.43470 | 665.42679 | 0.954 |
| C37H63O8P   | 5 | [M+H] <sup>+</sup>     | 667.43180 | 666.42606 | 2.301 |
| C35H65O8P   | 5 | [M+Na] <sup>+</sup>    | 667.43180 | 644.44171 | 1.304 |
| C36H72NO6P  | 1 | [M+Na] <sup>+</sup>    | 668.49700 | 645.50973 | 2.914 |
| C37H65O8P   | 6 | [M+H] <sup>+</sup>     | 669.44770 | 668.44171 | 1.921 |
| C35H67O8P   | 6 | [M+Na] <sup>+</sup>    | 669.44770 | 646.45736 | 1.673 |
| C40H70O5    | 1 | [M+K] <sup>+</sup>     | 669.48420 | 630.52233 | 1.906 |
| C36H71O7P   | 1 | [M+Na] <sup>+</sup>    | 669.48420 | 646.49374 | 1.845 |
| C34H66NO8P  | 3 | [M+Na] <sup>+</sup>    | 670.44000 | 647.45261 | 2.727 |
| C36H64NO8P  | 2 | [M+H] <sup>+</sup>     | 670.44130 | 669.43696 | 4.376 |
| C37H67O8P   | 6 | [M+H] <sup>+</sup>     | 671.46210 | 670.45736 | 3.777 |
| C35H69O8P   | 6 | [M+Na] <sup>+</sup>    | 671.46210 | 648.47301 | 0.194 |
| C37H69O8P   | 1 | [M-H] <sup>-</sup>     | 671.46560 | 672.47301 | 0.207 |
| C42H66O5    | 1 | [M-2H+Na] <sup>-</sup> | 671.46560 | 650.49103 | 0.128 |
| C44H72O2    | 1 | [M+K] <sup>+</sup>     | 671.51400 | 632.55323 | 3.546 |
| C41H76O5    | 1 | [M+Na] <sup>+</sup>    | 671.55740 | 648.56928 | 1.634 |
| C33H64NO9P  | 2 | [M+Na] <sup>+</sup>    | 672.42440 | 649.43187 | 4.918 |
| C34H68NO8P  | 3 | [M+Na] <sup>+</sup>    | 672.45780 | 649.46826 | 0.479 |
| C36H66NO8P  | 4 | [M+H] <sup>+</sup>     | 672.45790 | 671.45261 | 2.950 |
| C35H72NO7P  | 1 | [M+Na] <sup>+</sup>    | 672.49680 | 649.50464 | 4.367 |
| C41H79NO3   | 1 | [M+K] <sup>+</sup>     | 672.57190 | 633.60600 | 4.096 |
| C42H68O5    | 1 | [M-2H+Na] <sup>-</sup> | 673.48180 | 652.50668 | 0.689 |
| C37H71O8P   | 2 | [M-H] <sup>-</sup>     | 673.48180 | 674.48866 | 0.610 |
| C43H70O4    | 1 | [M+Na] <sup>+</sup>    | 673.51670 | 650.52741 | 0.101 |
| C38H73O7P   | 1 | [M+H] <sup>+</sup>     | 673.51670 | 672.50939 | 0.043 |
| C32H45NO13  | 1 | [M+Na] <sup>+</sup>    | 674.28030 | 651.28910 | 2.942 |
| C36H68NO8P  | 1 | [M+H] <sup>+</sup>     | 674.47540 | 673.46826 | 0.199 |
| C36H70NO8P  | 1 | [M-H] <sup>-</sup>     | 674.47990 | 675.48391 | 4.838 |
| C37H72NO7P  | 1 | [M+H] <sup>+</sup>     | 674.51160 | 673.50464 | 0.473 |
| C38H75NO8   | 1 | [M+H] <sup>+</sup>     | 674.55790 | 673.54927 | 2.006 |
| C31H57O12P  | 1 | [M+Na] <sup>+</sup>    | 675.34470 | 652.35877 | 4.872 |
| C36H69O9P   | 1 | [M-H] <sup>-</sup>     | 675.46170 | 676.46792 | 1.549 |
| C35H68NO9P  | 1 | [M-H] <sup>-</sup>     | 676.45590 | 677.46317 | 0.003 |
| C36H72NO8P  | 1 | [M-H] <sup>-</sup>     | 676.49240 | 677.49956 | 0.167 |
| C36H70NO8P  | 5 | [M+H] <sup>+</sup>     | 676.49320 | 675.48391 | 2.980 |
| C31H59O12P  | 1 | [M+Na] <sup>+</sup>    | 677.36620 | 654.37442 | 3.779 |
| C36H69O9P   | 1 | [M+H] <sup>+</sup>     | 677.47620 | 676.46792 | 1.475 |
| C35H68NO9P  | 2 | [M+H] <sup>+</sup>     | 678.46980 | 677.46317 | 0.957 |
| C36H72NO8P  | 4 | [M+H] <sup>+</sup>     | 678.50740 | 677.49956 | 0.834 |
| C37H76NO7P  | 2 | [M+H] <sup>+</sup>     | 678.54170 | 677.53594 | 2.240 |
| C38H63O8P   | 1 | [M+H] <sup>+</sup>     | 679.43030 | 678.42606 | 4.468 |
| C36H65O8P   | 1 | [M+Na] <sup>+</sup>    | 679.43030 | 656.44171 | 0.927 |
| C41H71NO4   | 1 | [M+K] <sup>+</sup>     | 680.50030 | 641.53831 | 1.705 |
| C38H65O8P   | 5 | [M+H] <sup>+</sup>     | 681.44730 | 680.44171 | 2.474 |
| C36H67O8P   | 4 | [M+Na] <sup>+</sup>    | 681.44730 | 658.45736 | 1.057 |
| C35H69O8PS  | 1 | [M+H] <sup>+</sup>     | 681.45100 | 680.44508 | 1.993 |
| C37H71O7P   | 1 | [M+Na] <sup>+</sup>    | 681.48480 | 658.49374 | 2.693 |
| C39H69O7P   | 1 | [M+H] <sup>+</sup>     | 681.48480 | 680.47809 | 0.838 |
| C32H53NO11S | 1 | [M+Na] <sup>+</sup>    | 682.32640 | 659.33394 | 4.751 |
| C35H66NO8P  | 3 | [M+Na] <sup>+</sup>    | 682.44360 | 659.45261 | 2.597 |
| C37H64NO8P  | 5 | [M+H] <sup>+</sup>     | 682.44360 | 681.43696 | 0.929 |

|             |   |            |           |           |       |
|-------------|---|------------|-----------|-----------|-------|
| C40H73N3O4  | 4 | [M+Na]+    | 682.54600 | 659.56011 | 4.876 |
| C36H58O12   | 2 | [M+H]+     | 683.39830 | 682.39283 | 2.646 |
| C38H67O8P   | 6 | [M+H]+     | 683.46320 | 682.45736 | 2.101 |
| C43H64O5    | 6 | [M+Na]+    | 683.46320 | 660.47538 | 2.044 |
| C36H69O8P   | 6 | [M+Na]+    | 683.46320 | 660.47301 | 1.419 |
| C36H73N2O5P | 2 | [M+K]+     | 683.49100 | 644.52571 | 3.130 |
| C35H68NO7P  | 3 | [M+K]+     | 684.43990 | 645.47334 | 4.979 |
| C35H67NO8S  | 1 | [M+Na]+    | 684.44630 | 661.45874 | 2.430 |
| C37H66NO8P  | 6 | [M+H]+     | 684.45810 | 683.45261 | 2.606 |
| C35H68NO8P  | 1 | [M+Na]+    | 684.45810 | 661.46826 | 0.909 |
| C36H72NO6P  | 3 | [M+K]+     | 684.47030 | 645.50973 | 3.765 |
| C40H63N5O3  | 1 | [M+Na]+    | 684.48410 | 661.49309 | 2.614 |
| C37H58O10   | 1 | [M+Na]+    | 685.39460 | 662.40300 | 3.470 |
| C36H70O9    | 4 | [M+K]+     | 685.46230 | 646.50199 | 4.137 |
| C35H71N2O6P | 1 | [M+K]+     | 685.47110 | 646.50498 | 4.339 |
| C35H70N2O8  | 2 | [M+K]+     | 685.47370 | 646.51322 | 3.894 |
| C45H66O5    | 1 | [M-H]-     | 685.48220 | 686.49103 | 2.270 |
| C43H68O5    | 1 | [M-2H+Na]- | 685.48220 | 664.50668 | 1.260 |
| C38H71O8P   | 1 | [M-H]-     | 685.48220 | 686.48866 | 1.183 |
| C41H74O5    | 1 | [M+K]+     | 685.51380 | 646.55363 | 4.341 |
| C39H73O7P   | 1 | [M+H]+     | 685.51380 | 684.50939 | 4.188 |
| C37H75O7P   | 1 | [M+Na]+    | 685.51380 | 662.52504 | 0.678 |
| C35H70NO7P  | 1 | [M+K]+     | 686.45180 | 647.48899 | 0.498 |
| C37H68NO8P  | 6 | [M+H]+     | 686.47390 | 685.46826 | 2.380 |
| C37H70NO8P  | 1 | [M-H]-     | 686.47700 | 687.48391 | 0.529 |
| C36H74NO7P  | 4 | [M+Na]+    | 686.50820 | 663.52029 | 1.914 |
| C38H72NO7P  | 3 | [M+H]+     | 686.50970 | 685.50464 | 3.232 |
| C37H78NO6P  | 1 | [M+Na]+    | 686.54460 | 663.55668 | 1.892 |
| C37H61O8P   | 1 | [M+Na]+    | 687.40300 | 664.41041 | 4.903 |
| C35H71O9P   | 1 | [M-2H+Na]- | 687.46050 | 666.48357 | 3.296 |
| C43H68O4    | 3 | [M+K]+     | 687.47670 | 648.51176 | 2.602 |
| C43H70O4    | 1 | [M-2H+K]-  | 687.47850 | 650.52741 | 3.620 |
| C36H72O9    | 3 | [M+K]+     | 687.47850 | 648.51764 | 3.325 |
| C35H73N2O6P | 1 | [M+K]+     | 687.48550 | 648.52063 | 2.508 |
| C44H78O5    | 1 | [M+H]+     | 687.59020 | 686.58493 | 2.913 |
| C42H80O5    | 1 | [M+Na]+    | 687.59020 | 664.60058 | 0.586 |
| C37H70NO8P  | 6 | [M+H]+     | 688.49220 | 687.48391 | 1.476 |
| C37H72NO8P  | 1 | [M-H]-     | 688.49300 | 689.49956 | 1.036 |
| C36H76NO6P  | 1 | [M+K]+     | 688.50100 | 649.54103 | 4.616 |
| C34H67O9P   | 2 | [M+K]+     | 689.41320 | 650.45227 | 3.226 |
| C34H67O10P  | 3 | [M+Na]+    | 689.43910 | 666.44719 | 3.902 |
| C36H65O10P  | 1 | [M+H]+     | 689.43910 | 688.43154 | 0.412 |
| C37H71O9P   | 1 | [M-H]-     | 689.47680 | 690.48357 | 0.719 |
| C39H77O7P   | 1 | [M+H]+     | 689.54850 | 688.54069 | 0.767 |
| C41H78O5    | 1 | [M+K]+     | 689.54850 | 650.58493 | 0.615 |
| C45H78O2    | 1 | [M+K]+     | 689.56500 | 650.60018 | 2.420 |
| C35H64NO10P | 1 | [M+H]+     | 690.43460 | 689.42679 | 0.776 |
| C36H68NO9P  | 1 | [M+H]+     | 690.47250 | 689.46317 | 2.970 |
| C36H70NO9P  | 1 | [M-H]-     | 690.47450 | 691.47882 | 4.270 |
| C37H74NO8P  | 4 | [M-H]-     | 690.50690 | 691.51521 | 1.503 |
| C37H72NO8P  | 6 | [M+H]+     | 690.50820 | 689.49956 | 1.978 |
| C38H76NO7P  | 2 | [M+H]+     | 690.54540 | 689.53594 | 3.157 |
| C42H85NO3   | 1 | [M+K]+     | 690.61490 | 651.65295 | 1.730 |

|              |   |            |           |           |       |
|--------------|---|------------|-----------|-----------|-------|
| C34H69O9P    | 6 | [M+K]+     | 691.42920 | 652.46792 | 2.710 |
| C39H63O8P    | 1 | [M+H]+     | 691.42990 | 690.42606 | 4.969 |
| C36H69O10P   | 1 | [M-H]-     | 691.45750 | 692.46284 | 2.793 |
| C37H71O9P    | 3 | [M+H]+     | 691.49400 | 690.48357 | 4.554 |
| C43H72O5     | 3 | [M+Na]+    | 691.53040 | 668.53798 | 4.632 |
| C38H75O8P    | 3 | [M+H]+     | 691.53040 | 690.51996 | 4.575 |
| C45H70O5     | 3 | [M+H]+     | 691.53040 | 690.52233 | 1.153 |
| C45H80O2     | 1 | [M+K]+     | 691.57860 | 652.61583 | 0.551 |
| C37H74NO8P   | 5 | [M+H]+     | 692.52530 | 691.51521 | 4.065 |
| C39H82NO6P   | 1 | [M+H]+     | 692.59480 | 691.58798 | 0.657 |
| C36H63O8P    | 1 | [M+K]+     | 693.39260 | 654.42606 | 4.890 |
| C39H65O8P    | 3 | [M+H]+     | 693.44560 | 692.44171 | 4.883 |
| C36H71O10P   | 1 | [M-H]-     | 693.47090 | 694.47849 | 0.460 |
| C38H71O7P    | 1 | [M+Na]+    | 693.48120 | 670.49374 | 2.545 |
| C35H68NO10P  | 1 | [M+H]+     | 694.46610 | 693.45809 | 1.060 |
| C39H67O8P    | 6 | [M+H]+     | 695.46160 | 694.45736 | 4.365 |
| C37H69O8P    | 6 | [M+Na]+    | 695.46160 | 672.47301 | 0.906 |
| C37H73N2O6P  | 1 | [M+Na]+    | 695.50690 | 672.52063 | 4.237 |
| C38H66NO8P   | 1 | [M+H]+     | 696.45760 | 695.45261 | 3.279 |
| C42H58O6     | 1 | [M+K]+     | 697.38740 | 658.42334 | 1.303 |
| C39H69O8P    | 6 | [M+H]+     | 697.47900 | 696.47301 | 1.844 |
| C37H71O8P    | 6 | [M+Na]+    | 697.47900 | 674.48866 | 1.606 |
| C38H74O9     | 1 | [M+Na]+    | 697.52480 | 674.53329 | 3.287 |
| C37H75N2O6P  | 1 | [M+Na]+    | 697.52480 | 674.53628 | 0.999 |
| C49H76O2     | 1 | [M+H]+     | 697.58880 | 696.58453 | 4.312 |
| C47H78O2     | 1 | [M+Na]+    | 697.58880 | 674.60018 | 0.863 |
| C35H66NO8P   | 1 | [M+K]+     | 698.41240 | 659.45261 | 4.807 |
| C38H68NO8P   | 6 | [M+H]+     | 698.47770 | 697.46826 | 3.101 |
| C33H55NaO12S | 2 | [M+H]+     | 699.33650 | 698.33120 | 2.823 |
| C33H63O13P   | 1 | [M+H]+     | 699.41030 | 698.40063 | 3.416 |
| C36H69O9P    | 1 | [M+Na]+    | 699.45680 | 676.46792 | 0.493 |
| C37H73O8P    | 1 | [M+Na]+    | 699.49020 | 676.50431 | 4.761 |
| C39H73O8P    | 1 | [M-H]-     | 699.49770 | 700.50431 | 0.945 |
| C35H68NO9P   | 1 | [M+Na]+    | 700.45410 | 677.46317 | 2.437 |
| C40H63N5O3   | 2 | [M+K]+     | 700.45810 | 661.49309 | 2.655 |
| C38H70NO8P   | 5 | [M+H]+     | 700.49070 | 699.48391 | 0.691 |
| C36H72NO8P   | 1 | [M+Na]+    | 700.49130 | 677.49956 | 3.600 |
| C38H72NO8P   | 1 | [M-H]-     | 700.49220 | 701.49956 | 0.124 |
| C37H76NO7P   | 2 | [M+Na]+    | 700.52220 | 677.53594 | 4.231 |
| C39H74NO7P   | 1 | [M+H]+     | 700.52600 | 699.52029 | 2.241 |
| C38H63O8P    | 1 | [M+Na]+    | 701.41440 | 678.42606 | 1.255 |
| C37H65O10P   | 5 | [M+H]+     | 701.43590 | 700.43154 | 4.157 |
| C35H67O10P   | 5 | [M+Na]+    | 701.43590 | 678.44719 | 0.727 |
| C36H73O9P    | 1 | [M-2H+Na]- | 701.47600 | 680.49922 | 3.017 |
| C37H75O7P    | 1 | [M+K]+     | 701.49100 | 662.52504 | 4.000 |
| C36H75N2O6P  | 3 | [M+K]+     | 701.49790 | 662.53628 | 2.175 |
| C39H73O8P    | 1 | [M+H]+     | 701.51130 | 700.50431 | 0.408 |
| C36H64NO10P  | 1 | [M+H]+     | 702.43650 | 701.42679 | 3.468 |
| C37H70NO9P   | 1 | [M-H]-     | 702.47250 | 703.47882 | 1.350 |
| C38H74NO8P   | 3 | [M-H]-     | 702.50560 | 703.51521 | 3.328 |
| C38H72NO8P   | 6 | [M+H]+     | 702.50790 | 701.49956 | 1.517 |
| C44H89NO3    | 1 | [M+Na]+    | 702.67080 | 679.68425 | 3.794 |
| C35H69O9P    | 1 | [M+K]+     | 703.42960 | 664.46792 | 2.095 |



|             |   |                     |           |           |       |
|-------------|---|---------------------|-----------|-----------|-------|
| C37H67O10P  | 5 | [M+H] <sup>+</sup>  | 703.45310 | 702.44719 | 1.942 |
| C35H69O10P  | 6 | [M+Na] <sup>+</sup> | 703.45310 | 680.46284 | 1.478 |
| C37H69O10P  | 1 | [M-H] <sup>-</sup>  | 703.45590 | 704.46284 | 0.471 |
| C39H69O7P   | 1 | [M+Na] <sup>+</sup> | 703.47060 | 680.47809 | 4.670 |
| C43H68O5    | 1 | [M+K] <sup>+</sup>  | 703.47060 | 664.50668 | 1.100 |
| C36H73O9P   | 1 | [M+Na] <sup>+</sup> | 703.48500 | 680.49922 | 4.897 |
| C50H70O2    | 1 | [M+H] <sup>+</sup>  | 703.54140 | 702.53758 | 4.915 |
| C34H68NO9P  | 2 | [M+K] <sup>+</sup>  | 704.42380 | 665.46317 | 3.580 |
| C36H66NO10P | 1 | [M+H] <sup>+</sup>  | 704.44680 | 703.44244 | 4.137 |
| C37H70NO9P  | 2 | [M+H] <sup>+</sup>  | 704.48690 | 703.47882 | 1.137 |
| C37H72NO9P  | 1 | [M-H] <sup>-</sup>  | 704.48700 | 705.49447 | 0.288 |
| C38H74NO8P  | 6 | [M+H] <sup>+</sup>  | 704.52360 | 703.51521 | 1.583 |
| C34H67O10P  | 2 | [M+K] <sup>+</sup>  | 705.40940 | 666.44719 | 1.331 |
| C39H60O11   | 1 | [M+H] <sup>+</sup>  | 705.42180 | 704.41357 | 1.357 |
| C35H71O9P   | 4 | [M+K] <sup>+</sup>  | 705.44350 | 666.48357 | 4.570 |
| C40H65O8P   | 1 | [M+H] <sup>+</sup>  | 705.44570 | 704.44171 | 4.658 |
| C37H69O10P  | 1 | [M+H] <sup>+</sup>  | 705.47060 | 704.46284 | 0.686 |
| C37H71O10P  | 1 | [M-H] <sup>-</sup>  | 705.47220 | 706.47849 | 1.391 |
| C41H69O7P   | 1 | [M+H] <sup>+</sup>  | 705.48720 | 704.47809 | 2.593 |
| C43H70O5    | 1 | [M+K] <sup>+</sup>  | 705.48720 | 666.52233 | 2.444 |
| C38H73O9P   | 1 | [M+H] <sup>+</sup>  | 705.50950 | 704.49922 | 4.251 |
| C39H77O8P   | 1 | [M+H] <sup>+</sup>  | 705.53970 | 704.53561 | 4.516 |
| C44H74O5    | 1 | [M+Na] <sup>+</sup> | 705.53970 | 682.55363 | 4.460 |
| C40H81O7P   | 1 | [M+H] <sup>+</sup>  | 705.58130 | 704.57199 | 2.876 |
| C42H82O5    | 1 | [M+K] <sup>+</sup>  | 705.58130 | 666.61623 | 2.727 |
| C47H76O4    | 1 | [M+H] <sup>+</sup>  | 705.58130 | 704.57436 | 0.479 |
| C45H84O5    | 2 | [M+H] <sup>+</sup>  | 705.64040 | 704.63188 | 1.767 |
| C37H72NO9P  | 5 | [M+H] <sup>+</sup>  | 706.50190 | 705.49447 | 0.212 |
| C39H74NO6P  | 1 | [M+Na] <sup>+</sup> | 706.51750 | 683.52538 | 4.106 |
| C38H76NO8P  | 1 | [M+H] <sup>+</sup>  | 706.53810 | 705.53086 | 0.050 |
| C39H76N2O7  | 1 | [M+Na] <sup>+</sup> | 707.55480 | 684.56525 | 0.459 |
| C33H57NO15  | 1 | [M+H] <sup>+</sup>  | 708.38340 | 707.37283 | 4.656 |
| C39H66NO8P  | 3 | [M+H] <sup>+</sup>  | 708.45710 | 707.45261 | 3.930 |
| C38H71O7P   | 3 | [M+K] <sup>+</sup>  | 709.45860 | 670.49374 | 2.405 |
| C38H71O8P   | 2 | [M+Na] <sup>+</sup> | 709.47950 | 686.48866 | 2.283 |
| C45H66O5    | 3 | [M+Na] <sup>+</sup> | 709.48290 | 686.49103 | 3.739 |
| C40H69O8P   | 3 | [M+H] <sup>+</sup>  | 709.48290 | 708.47301 | 3.684 |
| C37H73O8PS  | 1 | [M+H] <sup>+</sup>  | 709.48290 | 708.47638 | 1.068 |
| C39H75O7P   | 1 | [M+Na] <sup>+</sup> | 709.51280 | 686.52504 | 2.065 |
| C39H68NO8P  | 6 | [M+H] <sup>+</sup>  | 710.47410 | 709.46826 | 2.018 |
| C38H74NO7P  | 1 | [M+Na] <sup>+</sup> | 710.51040 | 687.52029 | 1.247 |
| C37H73N2O6P | 2 | [M+K] <sup>+</sup>  | 711.48340 | 672.52063 | 0.528 |
| C38H73O8P   | 3 | [M+Na] <sup>+</sup> | 711.49700 | 688.50431 | 4.877 |
| C45H68O5    | 3 | [M+Na] <sup>+</sup> | 711.49700 | 688.50668 | 1.550 |
| C40H71O8P   | 3 | [M+H] <sup>+</sup>  | 711.49700 | 710.48866 | 1.495 |
| C50H72      | 1 | [M+K] <sup>+</sup>  | 711.52380 | 672.56340 | 3.866 |
| C34H59NO13  | 4 | [M+Na] <sup>+</sup> | 712.38950 | 689.39865 | 2.294 |
| C35H64NO10P | 1 | [M+Na] <sup>+</sup> | 712.41880 | 689.42679 | 3.919 |
| C36H68NO8P  | 2 | [M+K] <sup>+</sup>  | 712.43340 | 673.46826 | 2.797 |
| C34H66NO12P | 5 | [M+H] <sup>+</sup>  | 712.44000 | 711.43227 | 0.640 |
| C36H68NO9P  | 4 | [M+Na] <sup>+</sup> | 712.45360 | 689.46317 | 1.694 |
| C37H72NO7P  | 2 | [M+K] <sup>+</sup>  | 712.46690 | 673.50464 | 1.252 |
| C39H70NO8P  | 6 | [M+H] <sup>+</sup>  | 712.49000 | 711.48391 | 1.662 |

|             |   |            |           |           |       |
|-------------|---|------------|-----------|-----------|-------|
| C39H72NO8P  | 1 | [M-H]-     | 712.49160 | 713.49956 | 0.964 |
| C38H76NO6P  | 1 | [M+K]+     | 712.50180 | 673.54103 | 3.338 |
| C38H75NO8   | 2 | [M+K]+     | 712.50960 | 673.54927 | 3.958 |
| C38H76NO7P  | 3 | [M+Na]+    | 712.52590 | 689.53594 | 1.033 |
| C34H65O13P  | 1 | [M+H]+     | 713.42300 | 712.41628 | 0.786 |
| C37H71O9P   | 1 | [M+Na]+    | 713.47180 | 690.48357 | 1.395 |
| C46H64O6    | 1 | [M+H]+     | 713.47530 | 712.47029 | 3.179 |
| C37H73O9P   | 1 | [M-2H+Na]- | 713.47610 | 692.49922 | 3.106 |
| C38H74O9    | 4 | [M+K]+     | 713.49340 | 674.53329 | 4.255 |
| C40H73O8P   | 2 | [M+H]+     | 713.51300 | 712.50431 | 1.982 |
| C47H68O5    | 2 | [M+H]+     | 713.51300 | 712.50668 | 1.336 |
| C39H79O7P   | 3 | [M+Na]+    | 713.54420 | 690.55634 | 1.913 |
| C38H79N2O6P | 1 | [M+Na]+    | 713.55810 | 690.56758 | 1.826 |
| C44H82O5    | 1 | [M+Na]+    | 713.60250 | 690.61623 | 4.130 |
| C48H82O2    | 1 | [M+Na]+    | 713.62420 | 690.63148 | 4.902 |
| C33H57NO13  | 1 | [M+K]+     | 714.34690 | 675.38300 | 1.057 |
| C34H62NO10P | 1 | [M+K]+     | 714.37160 | 675.41114 | 3.761 |
| C35H66NO10P | 1 | [M+Na]+    | 714.42810 | 691.44244 | 4.980 |
| C36H70NO8P  | 1 | [M+K]+     | 714.44840 | 675.48391 | 1.880 |
| C36H70NO9P  | 3 | [M+Na]+    | 714.46830 | 691.47882 | 0.360 |
| C37H74NO7P  | 1 | [M+K]+     | 714.48250 | 675.52029 | 1.320 |
| C37H74NO8P  | 1 | [M+Na]+    | 714.50100 | 691.51521 | 4.799 |
| C39H72NO8P  | 3 | [M+H]+     | 714.50720 | 713.49956 | 0.512 |
| C39H74NO8P  | 1 | [M-H]-     | 714.50860 | 715.51521 | 0.927 |
| C38H80NO6P  | 2 | [M-2H+K]-  | 714.51980 | 677.57233 | 1.579 |
| C38H78NO7P  | 4 | [M+Na]+    | 714.54280 | 691.55159 | 2.779 |
| C40H76NO7P  | 3 | [M+H]+     | 714.54280 | 713.53594 | 0.588 |
| C39H82NO6P  | 1 | [M+Na]+    | 714.58030 | 691.58798 | 4.340 |
| C36H69O10P  | 5 | [M+Na]+    | 715.45390 | 692.46284 | 2.572 |
| C38H67O10P  | 5 | [M+H]+     | 715.45390 | 714.44719 | 0.791 |
| C46H68O6    | 1 | [M-H]-     | 715.49170 | 716.50159 | 3.663 |
| C37H75O9P   | 1 | [M-2H+Na]- | 715.49170 | 694.51487 | 3.027 |
| C39H73O9P   | 1 | [M-H]-     | 715.49170 | 716.49922 | 0.355 |
| C38H76O9    | 5 | [M+K]+     | 715.50960 | 676.54894 | 3.474 |
| C37H77N2O6P | 1 | [M+K]+     | 715.51720 | 676.55193 | 2.968 |
| C45H72O5    | 1 | [M+Na]+    | 715.52870 | 692.53798 | 2.101 |
| C40H75O8P   | 1 | [M+H]+     | 715.52870 | 714.51996 | 2.046 |
| C47H70O5    | 1 | [M+H]+     | 715.52870 | 714.52233 | 1.262 |
| C34H64NO10P | 1 | [M+K]+     | 716.38960 | 677.42679 | 0.470 |
| C38H72NO9P  | 1 | [M-H]-     | 716.48710 | 717.49447 | 0.144 |
| C39H76NO8P  | 1 | [M-H]-     | 716.52340 | 717.53086 | 0.262 |
| C39H74NO8P  | 6 | [M+H]+     | 716.52410 | 715.51521 | 2.254 |
| C38H80NO6P  | 1 | [M+K]+     | 716.53730 | 677.57233 | 2.543 |
| C44H87NO3   | 1 | [M+K]+     | 716.63160 | 677.66860 | 0.202 |
| C37H64O13   | 1 | [M+H]+     | 717.44500 | 716.43470 | 4.219 |
| C36H71O9P   | 2 | [M+K]+     | 717.44500 | 678.48357 | 2.403 |
| C41H65O8P   | 1 | [M+H]+     | 717.44570 | 716.44171 | 4.580 |
| C38H69O10P  | 6 | [M+H]+     | 717.46680 | 716.46284 | 4.622 |
| C36H71O10P  | 6 | [M+Na]+    | 717.46680 | 694.47849 | 1.268 |
| C38H71O10P  | 1 | [M-H]-     | 717.47210 | 718.47849 | 1.228 |
| C35H70NO9P  | 1 | [M+K]+     | 718.44000 | 679.47882 | 2.745 |
| C37H70NO10P | 1 | [M-H]-     | 718.46620 | 719.47374 | 0.372 |
| C39H70NO7P  | 1 | [M+Na]+    | 718.47540 | 695.48899 | 3.915 |

|             |   |                        |           |           |       |
|-------------|---|------------------------|-----------|-----------|-------|
| C38H72NO9P  | 1 | [M+H] <sup>+</sup>     | 718.50270 | 717.49447 | 1.322 |
| C38H74NO9P  | 1 | [M-H] <sup>-</sup>     | 718.50290 | 719.51012 | 0.065 |
| C39H76NO8P  | 6 | [M+H] <sup>+</sup>     | 718.53950 | 717.53086 | 1.900 |
| C36H73O9P   | 5 | [M+K] <sup>+</sup>     | 719.46060 | 680.49922 | 2.466 |
| C41H67O8P   | 1 | [M+H] <sup>+</sup>     | 719.46760 | 718.45736 | 4.120 |
| C38H73O10P  | 2 | [M-H] <sup>-</sup>     | 719.48500 | 720.49414 | 2.598 |
| C40H75O7P   | 2 | [M-2H+Na] <sup>-</sup> | 719.49690 | 698.52504 | 3.897 |
| C44H74O5    | 1 | [M-2H+K] <sup>-</sup>  | 719.50240 | 682.55363 | 0.242 |
| C39H75O9P   | 2 | [M+H] <sup>+</sup>     | 719.52550 | 718.51487 | 4.654 |
| C40H79O8P   | 2 | [M+H] <sup>+</sup>     | 719.55640 | 718.55126 | 2.968 |
| C45H76O5    | 2 | [M+Na] <sup>+</sup>    | 719.55640 | 696.56928 | 2.914 |
| C47H74O5    | 1 | [M+H] <sup>+</sup>     | 719.55960 | 718.55363 | 1.811 |
| C46H86O5    | 1 | [M+H] <sup>+</sup>     | 719.65690 | 718.64753 | 2.913 |
| C37H70NO10P | 1 | [M+H] <sup>+</sup>     | 720.48170 | 719.47374 | 0.952 |
| C37H72NO10P | 1 | [M-H] <sup>-</sup>     | 720.48230 | 721.48939 | 0.253 |
| C39H74NO7P  | 2 | [M-2H+Na] <sup>-</sup> | 720.49630 | 699.52029 | 1.870 |
| C41H72NO7P  | 3 | [M-H] <sup>-</sup>     | 720.49630 | 721.50464 | 1.488 |
| C38H74NO9P  | 1 | [M+H] <sup>+</sup>     | 720.51870 | 719.51012 | 1.804 |
| C40H75NO8   | 1 | [M+Na] <sup>+</sup>    | 720.53600 | 697.54927 | 3.457 |
| C39H71O7P   | 4 | [M+K] <sup>+</sup>     | 721.45890 | 682.49374 | 2.780 |
| C38H75O10P  | 2 | [M-H] <sup>-</sup>     | 721.50260 | 722.50979 | 0.112 |
| C40H77O7P   | 2 | [M-2H+Na] <sup>-</sup> | 721.51180 | 700.54069 | 4.926 |
| C39H76N2O7  | 2 | [M-2H+K] <sup>-</sup>  | 721.51180 | 684.56525 | 2.847 |
| C44H76O5    | 1 | [M-2H+K] <sup>-</sup>  | 721.51740 | 684.56928 | 0.660 |
| C40H68NO8P  | 3 | [M+H] <sup>+</sup>     | 722.47280 | 721.46826 | 3.784 |
| C37H72NO10P | 2 | [M+H] <sup>+</sup>     | 722.49750 | 721.48939 | 1.156 |
| C42H85NO5   | 1 | [M+K] <sup>+</sup>     | 722.60470 | 683.64278 | 1.695 |
| C40H68O7P2  | 1 | [M+H] <sup>+</sup>     | 723.44780 | 722.44403 | 4.849 |
| C39H73O7P   | 2 | [M+K] <sup>+</sup>     | 723.47230 | 684.50939 | 0.337 |
| C39H73O8P   | 4 | [M+Na] <sup>+</sup>    | 723.49270 | 700.50431 | 1.147 |
| C41H71O8P   | 5 | [M+H] <sup>+</sup>     | 723.49800 | 722.48866 | 2.853 |
| C44H76O5    | 3 | [M+K] <sup>+</sup>     | 723.52990 | 684.56928 | 3.491 |
| C39H76N2O7  | 1 | [M+K] <sup>+</sup>     | 723.52990 | 684.56525 | 2.068 |
| C40H77O7P   | 1 | [M+Na] <sup>+</sup>    | 723.52990 | 700.54069 | 0.021 |
| C38H72NO7P  | 1 | [M+K] <sup>+</sup>     | 724.47120 | 685.50464 | 4.704 |
| C40H70NO8P  | 6 | [M+H] <sup>+</sup>     | 724.48970 | 723.48391 | 2.048 |
| C41H73NO9   | 1 | [M+H] <sup>+</sup>     | 724.53300 | 723.52854 | 3.881 |
| C40H79NO8   | 1 | [M+Na] <sup>+</sup>    | 724.56970 | 701.58057 | 0.126 |
| C38H75N2O6P | 1 | [M+K] <sup>+</sup>     | 725.49840 | 686.53628 | 1.414 |
| C39H75O8P   | 1 | [M+Na] <sup>+</sup>    | 725.50640 | 702.51996 | 3.832 |
| C44H78O5    | 3 | [M+K] <sup>+</sup>     | 725.54940 | 686.58493 | 1.825 |
| C45H82O5    | 1 | [M+Na] <sup>+</sup>    | 725.60300 | 702.61623 | 3.372 |
| C36H66NO10P | 1 | [M+Na] <sup>+</sup>    | 726.43340 | 703.44244 | 2.398 |
| C38H64NO10P | 1 | [M+H] <sup>+</sup>     | 726.43340 | 725.42679 | 0.914 |
| C37H70NO9P  | 4 | [M+Na] <sup>+</sup>    | 726.46930 | 703.47882 | 1.730 |
| C38H74NO7P  | 2 | [M+K] <sup>+</sup>     | 726.48550 | 687.52029 | 2.831 |
| C40H72NO8P  | 6 | [M+H] <sup>+</sup>     | 726.50560 | 725.49956 | 1.699 |
| C39H78NO7P  | 2 | [M+Na] <sup>+</sup>    | 726.53810 | 703.55159 | 3.736 |
| C41H76NO7P  | 2 | [M+H] <sup>+</sup>     | 726.54680 | 725.53594 | 4.927 |
| C41H75NO9   | 2 | [M+H] <sup>+</sup>     | 726.55220 | 725.54419 | 1.016 |
| C42H80NO6P  | 1 | [M+H] <sup>+</sup>     | 726.57730 | 725.57233 | 3.172 |
| C42H79NO8   | 1 | [M+H] <sup>+</sup>     | 726.58860 | 725.58057 | 1.036 |
| C39H67O10P  | 1 | [M+H] <sup>+</sup>     | 727.45120 | 726.44719 | 4.490 |

|             |   |                        |           |           |       |
|-------------|---|------------------------|-----------|-----------|-------|
| C37H69O10P  | 1 | [M+Na] <sup>+</sup>    | 727.45120 | 704.46284 | 1.182 |
| C45H68O5    | 1 | [M+K] <sup>+</sup>     | 727.47260 | 688.50668 | 3.813 |
| C38H73O9P   | 3 | [M+Na] <sup>+</sup>    | 727.49040 | 704.49922 | 2.687 |
| C40H71O9P   | 2 | [M+H] <sup>+</sup>     | 727.49040 | 726.48357 | 0.620 |
| C38H77N2O6P | 1 | [M+K] <sup>+</sup>     | 727.51790 | 688.55193 | 3.882 |
| C39H77O8P   | 1 | [M+Na] <sup>+</sup>    | 727.52810 | 704.53561 | 4.495 |
| C41H75O8P   | 3 | [M+H] <sup>+</sup>     | 727.52950 | 726.51996 | 3.112 |
| C44H80O5    | 1 | [M+K] <sup>+</sup>     | 727.56190 | 688.60058 | 2.510 |
| C47H76O4    | 1 | [M+Na] <sup>+</sup>    | 727.56190 | 704.57436 | 2.312 |
| C40H81O7P   | 1 | [M+Na] <sup>+</sup>    | 727.56190 | 704.57199 | 0.942 |
| C39H81N2O6P | 1 | [M+Na] <sup>+</sup>    | 727.56910 | 704.58323 | 4.600 |
| C49H74O4    | 1 | [M+H] <sup>+</sup>     | 727.56910 | 726.55871 | 4.277 |
| C41H79N2O6P | 1 | [M+H] <sup>+</sup>     | 727.57750 | 726.56758 | 3.638 |
| C34H59NO14  | 1 | [M+Na] <sup>+</sup>    | 728.38320 | 705.39356 | 0.575 |
| C36H68NO9P  | 1 | [M+K] <sup>+</sup>     | 728.42580 | 689.46317 | 0.717 |
| C36H68NO10P | 2 | [M+Na] <sup>+</sup>    | 728.45020 | 705.45809 | 3.970 |
| C38H66NO10P | 4 | [M+H] <sup>+</sup>     | 728.45020 | 727.44244 | 0.667 |
| C37H72NO9P  | 1 | [M+Na] <sup>+</sup>    | 728.48570 | 705.49447 | 2.754 |
| C37H74NO9P  | 1 | [M-2H+Na] <sup>-</sup> | 728.48670 | 707.51012 | 2.631 |
| C39H72NO9P  | 1 | [M-H] <sup>-</sup>     | 728.48670 | 729.49447 | 0.690 |
| C40H76NO8P  | 1 | [M-H] <sup>-</sup>     | 728.52320 | 729.53086 | 0.533 |
| C40H74NO8P  | 2 | [M+H] <sup>+</sup>     | 728.52530 | 727.51521 | 3.864 |
| C40H67O8P   | 1 | [M+Na] <sup>+</sup>    | 729.44790 | 706.45736 | 1.810 |
| C39H69O10P  | 6 | [M+H] <sup>+</sup>     | 729.46720 | 728.46284 | 3.997 |
| C37H71O10P  | 6 | [M+Na] <sup>+</sup>    | 729.46720 | 706.47849 | 0.699 |
| C41H71O7P   | 1 | [M+Na] <sup>+</sup>    | 729.48240 | 706.49374 | 0.775 |
| C45H70O5    | 1 | [M+K] <sup>+</sup>     | 729.48730 | 690.52233 | 2.500 |
| C40H73O9P   | 1 | [M+H] <sup>+</sup>     | 729.50370 | 728.49922 | 3.840 |
| C38H75O9P   | 2 | [M+Na] <sup>+</sup>    | 729.50370 | 706.51487 | 0.541 |
| C38H77O9P   | 1 | [M-2H+Na] <sup>-</sup> | 729.50730 | 708.53052 | 2.901 |
| C40H75O9P   | 1 | [M-H] <sup>-</sup>     | 729.50730 | 730.51487 | 0.417 |
| C39H79O7P   | 2 | [M+K] <sup>+</sup>     | 729.51660 | 690.55634 | 3.967 |
| C38H79N2O6P | 4 | [M+K] <sup>+</sup>     | 729.53100 | 690.56758 | 0.376 |
| C44H82O5    | 3 | [M+K] <sup>+</sup>     | 729.57770 | 690.61623 | 2.297 |
| C42H81O7P   | 3 | [M+H] <sup>+</sup>     | 729.57770 | 728.57199 | 2.153 |
| C33H57NO15  | 1 | [M+Na] <sup>+</sup>    | 730.36110 | 707.37283 | 1.295 |
| C36H70NO10P | 4 | [M+Na] <sup>+</sup>    | 730.46640 | 707.47374 | 4.712 |
| C38H68NO10P | 2 | [M+H] <sup>+</sup>     | 730.46640 | 729.45809 | 1.418 |
| C38H70NO10P | 1 | [M-H] <sup>-</sup>     | 730.46760 | 731.47374 | 1.551 |
| C37H74NO9P  | 2 | [M+Na] <sup>+</sup>    | 730.50150 | 707.51012 | 2.951 |
| C39H72NO9P  | 3 | [M+H] <sup>+</sup>     | 730.50150 | 729.49447 | 0.342 |
| C39H74NO9P  | 2 | [M-H] <sup>-</sup>     | 730.50340 | 731.51012 | 0.749 |
| C43H72NO6P  | 1 | [M+H] <sup>+</sup>     | 730.51490 | 729.50973 | 2.880 |
| C41H73NO8   | 1 | [M+Na] <sup>+</sup>    | 730.52560 | 707.53362 | 3.777 |
| C40H76NO8P  | 5 | [M+H] <sup>+</sup>     | 730.53950 | 729.53086 | 1.868 |
| C40H78NO8P  | 1 | [M-H] <sup>-</sup>     | 730.54020 | 731.54651 | 1.317 |
| C41H80NO7P  | 1 | [M+H] <sup>+</sup>     | 730.57640 | 729.56724 | 2.573 |
| C37H73O9P   | 2 | [M+K] <sup>+</sup>     | 731.46450 | 692.49922 | 2.907 |
| C42H67O8P   | 3 | [M+H] <sup>+</sup>     | 731.46450 | 730.45736 | 0.186 |
| C40H69O8P   | 1 | [M+Na] <sup>+</sup>    | 731.46460 | 708.47301 | 3.240 |
| C37H73O8PS  | 2 | [M+Na] <sup>+</sup>    | 731.46690 | 708.47638 | 1.775 |
| C39H71O10P  | 5 | [M+H] <sup>+</sup>     | 731.48440 | 730.47849 | 1.867 |
| C37H73O10P  | 5 | [M+Na] <sup>+</sup>    | 731.48440 | 708.49414 | 1.422 |

|              |   |                        |           |           |       |
|--------------|---|------------------------|-----------|-----------|-------|
| C46H66O7     | 2 | [M+H] <sup>+</sup>     | 731.48510 | 730.48086 | 4.146 |
| C39H73O10P   | 1 | [M-H] <sup>-</sup>     | 731.48710 | 732.49414 | 0.316 |
| C45H72O5     | 1 | [M+K] <sup>+</sup>     | 731.49950 | 692.53798 | 2.223 |
| C41H73O7P    | 1 | [M+Na] <sup>+</sup>    | 731.49950 | 708.50939 | 1.210 |
| C43H73O7P    | 1 | [M-H] <sup>-</sup>     | 731.50550 | 732.50939 | 4.615 |
| C45H74O5     | 1 | [M-2H+K] <sup>-</sup>  | 731.50550 | 694.55363 | 4.476 |
| C36H72NO9P   | 6 | [M+K] <sup>+</sup>     | 732.45460 | 693.49447 | 4.127 |
| C41H66NO8P   | 3 | [M+H] <sup>+</sup>     | 732.45670 | 731.45261 | 4.347 |
| C38H70NO10P  | 1 | [M+H] <sup>+</sup>     | 732.47830 | 731.47374 | 3.705 |
| C38H72NO10P  | 1 | [M-H] <sup>-</sup>     | 732.48180 | 733.48939 | 0.434 |
| C39H74NO9P   | 2 | [M+H] <sup>+</sup>     | 732.51800 | 731.51012 | 0.819 |
| C39H76NO9P   | 1 | [M-H] <sup>-</sup>     | 732.51830 | 733.52577 | 0.277 |
| C40H78NO8P   | 5 | [M+H] <sup>+</sup>     | 732.55700 | 731.54651 | 4.389 |
| C35H66O13    | 1 | [M+K] <sup>+</sup>     | 733.41180 | 694.45035 | 2.312 |
| C39H73O10P   | 1 | [M+H] <sup>+</sup>     | 733.50330 | 732.49414 | 2.569 |
| C39H75O10P   | 1 | [M-H] <sup>-</sup>     | 733.50340 | 734.50979 | 1.201 |
| C45H76O5     | 1 | [M-2H+K] <sup>-</sup>  | 733.51510 | 696.56928 | 3.785 |
| C43H75O7P    | 1 | [M-H] <sup>-</sup>     | 733.51510 | 734.52504 | 3.645 |
| C41H77O7P    | 1 | [M-2H+Na] <sup>-</sup> | 733.51510 | 712.54069 | 0.346 |
| C41H85N2O6P  | 1 | [M+H] <sup>+</sup>     | 733.61960 | 732.61453 | 3.003 |
| C38H66NO8P   | 3 | [M+K] <sup>+</sup>     | 734.41230 | 695.45261 | 4.707 |
| C39H70NO7P   | 1 | [M+K] <sup>+</sup>     | 734.45440 | 695.48899 | 3.074 |
| C41H68NO8P   | 4 | [M+H] <sup>+</sup>     | 734.47190 | 733.46826 | 4.948 |
| C38H72NO10P  | 4 | [M+H] <sup>+</sup>     | 734.49910 | 733.48939 | 3.315 |
| C40H76NO7P   | 1 | [M-2H+Na] <sup>-</sup> | 734.51260 | 713.53594 | 2.719 |
| C39H76NO9P   | 3 | [M+H] <sup>+</sup>     | 734.53360 | 733.52577 | 0.749 |
| C40H80NO8P   | 3 | [M+H] <sup>+</sup>     | 734.57020 | 733.56216 | 1.041 |
| C41H84NO7P   | 1 | [M+H] <sup>+</sup>     | 734.60570 | 733.59854 | 0.163 |
| C38H65O10P   | 1 | [M+Na] <sup>+</sup>    | 735.42210 | 712.43154 | 1.822 |
| C40H73O8P    | 2 | [M+Na] <sup>+</sup>    | 735.49580 | 712.50431 | 3.086 |
| C47H68O5     | 2 | [M+Na] <sup>+</sup>    | 735.49580 | 712.50668 | 0.132 |
| C42H71O8P    | 4 | [M+H] <sup>+</sup>     | 735.49630 | 734.48866 | 0.495 |
| C39H75O10P   | 2 | [M+H] <sup>+</sup>     | 735.52070 | 734.50979 | 4.941 |
| C45H76O5     | 1 | [M+K] <sup>+</sup>     | 735.53100 | 696.56928 | 1.939 |
| C43H75O7P    | 1 | [M+H] <sup>+</sup>     | 735.53100 | 734.52504 | 1.796 |
| C41H77O7P    | 1 | [M+Na] <sup>+</sup>    | 735.53100 | 712.54069 | 1.475 |
| C51H90O2     | 1 | [M+H] <sup>+</sup>     | 735.69860 | 734.69408 | 3.750 |
| C39H72NO7P   | 1 | [M+K] <sup>+</sup>     | 736.46420 | 697.50464 | 4.877 |
| C41H70NO8P   | 3 | [M+H] <sup>+</sup>     | 736.48950 | 735.48391 | 2.287 |
| C39H72NO8P   | 1 | [M+Na] <sup>+</sup>    | 736.49010 | 713.49956 | 1.795 |
| C40H75NO8    | 1 | [M+K] <sup>+</sup>     | 736.51010 | 697.54927 | 3.150 |
| C38H74NO10P  | 1 | [M+H] <sup>+</sup>     | 736.51010 | 735.50504 | 3.007 |
| C33H55NaO12S | 1 | [M+K] <sup>+</sup>     | 737.29310 | 698.33120 | 1.691 |
| C40H75O7P    | 2 | [M+K] <sup>+</sup>     | 737.49010 | 698.52504 | 2.584 |
| C39H77O8PS   | 1 | [M+H] <sup>+</sup>     | 737.51660 | 736.50768 | 2.226 |
| C39H77O10P   | 1 | [M+H] <sup>+</sup>     | 737.53170 | 736.52544 | 1.378 |
| C41H72N2O9   | 1 | [M+H] <sup>+</sup>     | 737.53170 | 736.52378 | 0.866 |
| C43H77O7P    | 1 | [M+H] <sup>+</sup>     | 737.54930 | 736.54069 | 1.802 |
| C45H78O5     | 1 | [M+K] <sup>+</sup>     | 737.54930 | 698.58493 | 1.660 |
| C42H82O8     | 1 | [M+Na] <sup>+</sup>    | 737.58990 | 714.60097 | 0.396 |
| C46H82O5     | 1 | [M+Na] <sup>+</sup>    | 737.60640 | 714.61623 | 1.292 |
| C37H66NO10P  | 1 | [M+Na] <sup>+</sup>    | 738.43300 | 715.44244 | 1.817 |
| C39H74NO7P   | 3 | [M+K] <sup>+</sup>     | 738.48660 | 699.52029 | 4.275 |

|             |   |                        |           |           |       |
|-------------|---|------------------------|-----------|-----------|-------|
| C41H72NO8P  | 6 | [M+H] <sup>+</sup>     | 738.50530 | 737.49956 | 2.077 |
| C40H77NO8   | 3 | [M+K] <sup>+</sup>     | 738.52740 | 699.56492 | 0.907 |
| C40H78NO7P  | 1 | [M+Na] <sup>+</sup>    | 738.53890 | 715.55159 | 2.592 |
| C36H67O13P  | 1 | [M+H] <sup>+</sup>     | 739.44060 | 738.43193 | 1.878 |
| C40H67O10P  | 4 | [M+H] <sup>+</sup>     | 739.45320 | 738.44719 | 1.712 |
| C40H66O12   | 1 | [M+H] <sup>+</sup>     | 739.46080 | 738.45543 | 2.580 |
| C37H71O12P  | 1 | [M+H] <sup>+</sup>     | 739.47820 | 738.46832 | 3.521 |
| C39H73O9P   | 1 | [M+Na] <sup>+</sup>    | 739.49010 | 716.49922 | 2.238 |
| C46H68O6    | 1 | [M+Na] <sup>+</sup>    | 739.49010 | 716.50159 | 0.963 |
| C47H72O5    | 2 | [M+Na] <sup>+</sup>    | 739.53080 | 716.53798 | 4.872 |
| C42H75O8P   | 2 | [M+H] <sup>+</sup>     | 739.53080 | 738.51996 | 4.819 |
| C36H64NO10P | 1 | [M+K] <sup>+</sup>     | 740.38990 | 701.42679 | 0.050 |
| C37H68NO10P | 1 | [M+Na] <sup>+</sup>    | 740.44940 | 717.45809 | 2.825 |
| C39H66NO10P | 1 | [M+H] <sup>+</sup>     | 740.44940 | 739.44244 | 0.424 |
| C38H72NO9P  | 2 | [M+Na] <sup>+</sup>    | 740.48050 | 717.49447 | 4.313 |
| C40H70NO9P  | 5 | [M+H] <sup>+</sup>     | 740.48760 | 739.47882 | 2.027 |
| C39H76NO7P  | 3 | [M+K] <sup>+</sup>     | 740.49590 | 701.53594 | 4.312 |
| C41H74NO8P  | 6 | [M+H] <sup>+</sup>     | 740.52140 | 739.51521 | 1.465 |
| C40H80NO6P  | 1 | [M+K] <sup>+</sup>     | 740.53460 | 701.57233 | 1.186 |
| C40H79NO8   | 3 | [M+K] <sup>+</sup>     | 740.54240 | 701.58057 | 1.782 |
| C40H80NO7P  | 4 | [M+Na] <sup>+</sup>    | 740.55830 | 717.56724 | 2.479 |
| C42H78NO7P  | 4 | [M+H] <sup>+</sup>     | 740.55830 | 739.55159 | 0.770 |
| C40H55NaO7S | 1 | [M+K] <sup>+</sup>     | 741.31710 | 702.35662 | 3.607 |
| C40H69O10P  | 6 | [M+H] <sup>+</sup>     | 741.46660 | 740.46284 | 4.742 |
| C38H71O10P  | 6 | [M+Na] <sup>+</sup>    | 741.46660 | 718.47849 | 1.497 |
| C39H75O8P   | 2 | [M+K] <sup>+</sup>     | 741.48360 | 702.51996 | 0.662 |
| C37H73O12P  | 2 | [M+H] <sup>+</sup>     | 741.49200 | 740.48397 | 1.017 |
| C50H70O2    | 1 | [M+K] <sup>+</sup>     | 741.50040 | 702.53758 | 0.446 |
| C39H75O9P   | 2 | [M+Na] <sup>+</sup>    | 741.50540 | 718.51487 | 1.760 |
| C43H74O7    | 1 | [M+K] <sup>+</sup>     | 741.50540 | 702.54346 | 1.626 |
| C40H79O8P   | 2 | [M+Na] <sup>+</sup>    | 741.54400 | 718.55126 | 4.747 |
| C47H74O5    | 2 | [M+Na] <sup>+</sup>    | 741.54400 | 718.55363 | 1.555 |
| C42H77O8P   | 2 | [M+H] <sup>+</sup>     | 741.54400 | 740.53561 | 1.502 |
| C51H74O2    | 1 | [M+Na] <sup>+</sup>    | 741.55820 | 718.56888 | 0.132 |
| C45H82O5    | 2 | [M+K] <sup>+</sup>     | 741.57750 | 702.61623 | 2.530 |
| C43H81O7P   | 2 | [M+H] <sup>+</sup>     | 741.57750 | 740.57199 | 2.388 |
| C41H83O7P   | 2 | [M+Na] <sup>+</sup>    | 741.57750 | 718.58764 | 0.856 |
| C37H70NO10P | 2 | [M+Na] <sup>+</sup>    | 742.46010 | 719.47374 | 3.849 |
| C39H68NO10P | 3 | [M+H] <sup>+</sup>     | 742.46800 | 741.45809 | 3.550 |
| C40H74NO9P  | 1 | [M-H] <sup>-</sup>     | 742.50130 | 743.51012 | 2.092 |
| C38H76NO9P  | 1 | [M-2H+Na] <sup>-</sup> | 742.50130 | 721.52577 | 1.168 |
| C38H74NO9P  | 2 | [M+Na] <sup>+</sup>    | 742.50220 | 719.51012 | 3.846 |
| C40H72NO9P  | 2 | [M+H] <sup>+</sup>     | 742.50220 | 741.49447 | 0.606 |
| C41H78NO8P  | 1 | [M-H] <sup>-</sup>     | 742.53870 | 743.54651 | 0.725 |
| C41H76NO8P  | 2 | [M+H] <sup>+</sup>     | 742.54030 | 741.53086 | 2.916 |
| C41H77NO10  | 1 | [M-H] <sup>-</sup>     | 742.54570 | 743.55475 | 2.397 |
| C42H80NO7P  | 1 | [M+H] <sup>+</sup>     | 742.57110 | 741.56724 | 4.606 |
| C40H82NO7P  | 1 | [M+Na] <sup>+</sup>    | 742.57110 | 719.58289 | 1.366 |
| C37H69O10P  | 1 | [M+K] <sup>+</sup>     | 743.42250 | 704.46284 | 4.693 |
| C41H69O7P   | 1 | [M+K] <sup>+</sup>     | 743.44090 | 704.47809 | 0.463 |
| C38H73O9P   | 1 | [M+K] <sup>+</sup>     | 743.46210 | 704.49922 | 0.369 |
| C41H69O8P   | 3 | [M+Na] <sup>+</sup>    | 743.46480 | 720.47301 | 3.457 |
| C43H67O8P   | 4 | [M+H] <sup>+</sup>     | 743.46480 | 742.45736 | 0.221 |

|             |   |                        |           |           |       |
|-------------|---|------------------------|-----------|-----------|-------|
| C40H71O10P  | 6 | [M+H] <sup>+</sup>     | 743.48370 | 742.47849 | 2.779 |
| C38H73O10P  | 6 | [M+Na] <sup>+</sup>    | 743.48370 | 720.49414 | 0.457 |
| C39H77O8P   | 1 | [M+K] <sup>+</sup>     | 743.49860 | 704.53561 | 0.214 |
| C40H81O7P   | 2 | [M+K] <sup>+</sup>     | 743.53280 | 704.57199 | 3.153 |
| C39H81N2O6P | 1 | [M+K] <sup>+</sup>     | 743.54510 | 704.58323 | 1.716 |
| C47H76O5    | 1 | [M+Na] <sup>+</sup>    | 743.56190 | 720.56928 | 4.577 |
| C42H79O8P   | 1 | [M+H] <sup>+</sup>     | 743.56190 | 742.55126 | 4.524 |
| C43H83O7P   | 1 | [M+H] <sup>+</sup>     | 743.59210 | 742.58764 | 3.794 |
| C40H68NO8P  | 1 | [M+Na] <sup>+</sup>    | 744.45860 | 721.46826 | 1.507 |
| C37H72NO10P | 2 | [M+Na] <sup>+</sup>    | 744.47530 | 721.48939 | 4.445 |
| C39H72NO10P | 1 | [M-H] <sup>-</sup>     | 744.48240 | 745.48939 | 0.379 |
| C41H73NO8   | 1 | [M-2H+K] <sup>-</sup>  | 744.48240 | 707.53362 | 0.242 |
| C38H76NO9P  | 1 | [M+Na] <sup>+</sup>    | 744.51140 | 721.52577 | 4.827 |
| C40H76NO9P  | 1 | [M-H] <sup>-</sup>     | 744.51890 | 745.52577 | 0.533 |
| C39H80NO7P  | 1 | [M+K] <sup>+</sup>     | 744.52980 | 705.56724 | 0.796 |
| C41H78NO8P  | 6 | [M+H] <sup>+</sup>     | 744.55480 | 743.54651 | 1.363 |
| C41H77NO10  | 1 | [M+H] <sup>+</sup>     | 744.56570 | 743.55475 | 4.933 |
| C40H84NO6P  | 3 | [M+K] <sup>+</sup>     | 744.56990 | 705.60363 | 4.193 |
| C40H67O8P   | 1 | [M+K] <sup>+</sup>     | 745.41770 | 706.45736 | 3.768 |
| C40H68O7P2  | 2 | [M+Na] <sup>+</sup>    | 745.43010 | 722.44403 | 4.228 |
| C46H64O8    | 2 | [M+H] <sup>+</sup>     | 745.46970 | 744.46012 | 3.088 |
| C38H75O9P   | 2 | [M+K] <sup>+</sup>     | 745.47640 | 706.51487 | 2.178 |
| C43H69O8P   | 1 | [M+H] <sup>+</sup>     | 745.47920 | 744.47301 | 1.457 |
| C38H75O10P  | 5 | [M+Na] <sup>+</sup>    | 745.50220 | 722.50979 | 4.279 |
| C40H73O10P  | 5 | [M+H] <sup>+</sup>     | 745.50220 | 744.49414 | 1.052 |
| C47H70O7    | 1 | [M-H] <sup>-</sup>     | 745.50230 | 746.51210 | 3.394 |
| C40H75O10P  | 1 | [M-H] <sup>-</sup>     | 745.50230 | 746.50979 | 0.294 |
| C45H86O5    | 1 | [M+K] <sup>+</sup>     | 745.60780 | 706.64753 | 3.859 |
| C43H85O7P   | 1 | [M+H] <sup>+</sup>     | 745.60780 | 744.60329 | 3.716 |
| C42H85N2O6P | 1 | [M+H] <sup>+</sup>     | 745.62220 | 744.61453 | 0.532 |
| C39H66NO8P  | 1 | [M+K] <sup>+</sup>     | 746.41650 | 707.45261 | 0.995 |
| C37H74NO9P  | 4 | [M+K] <sup>+</sup>     | 746.47110 | 707.51012 | 2.911 |
| C41H73NO8   | 1 | [M+K] <sup>+</sup>     | 746.49590 | 707.53362 | 1.165 |
| C39H72NO10P | 1 | [M+H] <sup>+</sup>     | 746.49590 | 745.48939 | 1.025 |
| C39H74NO10P | 1 | [M-H] <sup>-</sup>     | 746.49690 | 747.50504 | 1.163 |
| C41H74NO7P  | 2 | [M+Na] <sup>+</sup>    | 746.50620 | 723.52029 | 4.439 |
| C41H76NO7P  | 2 | [M-2H+Na] <sup>-</sup> | 746.51260 | 725.53594 | 2.675 |
| C43H74NO7P  | 2 | [M-H] <sup>-</sup>     | 746.51260 | 747.52029 | 0.567 |
| C41H73NO9   | 1 | [M+Na] <sup>+</sup>    | 746.51570 | 723.52854 | 2.754 |
| C41H75NO9   | 1 | [M-2H+Na] <sup>-</sup> | 746.51850 | 725.54419 | 0.462 |
| C41H80NO8P  | 2 | [M+H] <sup>+</sup>     | 746.57000 | 745.56216 | 0.757 |
| C42H84NO7P  | 2 | [M+H] <sup>+</sup>     | 746.60600 | 745.59854 | 0.241 |
| C39H64O12   | 1 | [M+Na] <sup>+</sup>    | 747.43160 | 724.43978 | 3.476 |
| C40H69O8P   | 1 | [M+K] <sup>+</sup>     | 747.43560 | 708.47301 | 0.748 |
| C37H73O10P  | 1 | [M+K] <sup>+</sup>     | 747.45530 | 708.49414 | 2.661 |
| C41H73O7P   | 3 | [M+K] <sup>+</sup>     | 747.47550 | 708.50939 | 3.955 |
| C43H73O8P   | 1 | [M-H] <sup>-</sup>     | 747.50060 | 748.50431 | 4.764 |
| C43H70O10   | 1 | [M+H] <sup>+</sup>     | 747.50690 | 746.49690 | 3.641 |
| C40H77O10P  | 1 | [M-H] <sup>-</sup>     | 747.51910 | 748.52544 | 1.245 |
| C46H78O5    | 1 | [M-2H+K] <sup>-</sup>  | 747.53170 | 710.58493 | 2.443 |
| C49H74O4    | 1 | [M-2H+Na] <sup>-</sup> | 747.53170 | 726.55871 | 2.235 |
| C41H79O9P   | 1 | [M+H] <sup>+</sup>     | 747.55410 | 746.54617 | 0.868 |
| C42H70NO8P  | 5 | [M+H] <sup>+</sup>     | 748.48790 | 747.48391 | 4.387 |

|             |   |                        |           |           |       |
|-------------|---|------------------------|-----------|-----------|-------|
| C39H74NO10P | 2 | [M+H] <sup>+</sup>     | 748.50870 | 747.50504 | 4.830 |
| C41H78NO7P  | 3 | [M-2H+Na] <sup>-</sup> | 748.52770 | 727.55159 | 1.933 |
| C43H76NO7P  | 3 | [M-H] <sup>-</sup>     | 748.52770 | 749.53594 | 1.300 |
| C41H75NO9   | 1 | [M+Na] <sup>+</sup>    | 748.53220 | 725.54419 | 1.611 |
| C42H86NO7P  | 1 | [M+H] <sup>+</sup>     | 748.61960 | 747.61419 | 2.498 |
| C39H67O10P  | 2 | [M+Na] <sup>+</sup>    | 749.43300 | 726.44719 | 4.550 |
| C41H75O7P   | 3 | [M+K] <sup>+</sup>     | 749.49160 | 710.52504 | 4.544 |
| C40H77O10P  | 1 | [M+H] <sup>+</sup>     | 749.53590 | 748.52544 | 4.248 |
| C46H78O5    | 3 | [M+K] <sup>+</sup>     | 749.54940 | 710.58493 | 1.766 |
| C42H72NO8P  | 2 | [M+H] <sup>+</sup>     | 750.50360 | 749.49956 | 4.309 |
| C40H74NO8P  | 1 | [M+Na] <sup>+</sup>    | 750.50360 | 727.51521 | 1.105 |
| C39H76NO10P | 2 | [M+H] <sup>+</sup>     | 750.52800 | 749.52069 | 0.047 |
| C41H78NO7P  | 2 | [M+Na] <sup>+</sup>    | 750.54250 | 727.55159 | 2.246 |
| C43H76NO7P  | 2 | [M+H] <sup>+</sup>     | 750.54250 | 749.53594 | 0.959 |
| C40H80NO9P  | 1 | [M+H] <sup>+</sup>     | 750.56070 | 749.55707 | 4.863 |
| C42H75N3O8  | 1 | [M+H] <sup>+</sup>     | 750.56070 | 749.55542 | 2.657 |
| C42H81NO8   | 1 | [M+Na] <sup>+</sup>    | 750.58770 | 727.59622 | 3.010 |
| C34H65O13P  | 1 | [M+K] <sup>+</sup>     | 751.38080 | 712.41628 | 1.818 |
| C46H64O6    | 1 | [M+K] <sup>+</sup>     | 751.43680 | 712.47029 | 4.470 |
| C37H67O13P  | 1 | [M+H] <sup>+</sup>     | 751.43680 | 750.43193 | 3.209 |
| C41H77O7P   | 2 | [M+K] <sup>+</sup>     | 751.50290 | 712.54069 | 1.256 |
| C41H77O8P   | 1 | [M+Na] <sup>+</sup>    | 751.52200 | 728.53561 | 3.766 |
| C42H81O7P   | 1 | [M+Na] <sup>+</sup>    | 751.56490 | 728.57199 | 4.903 |
| C46H80O5    | 4 | [M+K] <sup>+</sup>     | 751.56490 | 712.60058 | 1.562 |
| C42H59N5O6  | 1 | [M+Na] <sup>+</sup>    | 752.43300 | 729.44654 | 3.663 |
| C40H66NO10P | 2 | [M+H] <sup>+</sup>     | 752.45330 | 751.44244 | 4.766 |
| C39H72NO8P  | 1 | [M+K] <sup>+</sup>     | 752.46570 | 713.49956 | 3.978 |
| C39H72NO9P  | 2 | [M+Na] <sup>+</sup>    | 752.48090 | 729.49447 | 3.713 |
| C40H76NO7P  | 1 | [M+K] <sup>+</sup>     | 752.49760 | 713.53594 | 1.984 |
| C43H72NO6P  | 2 | [M+Na] <sup>+</sup>    | 752.49930 | 729.50973 | 0.468 |
| C42H74NO8P  | 6 | [M+H] <sup>+</sup>     | 752.52210 | 751.51521 | 0.512 |
| C40H76NO8P  | 1 | [M+Na] <sup>+</sup>    | 752.52300 | 729.53086 | 3.882 |
| C41H80NO7P  | 1 | [M+Na] <sup>+</sup>    | 752.55780 | 729.56724 | 1.775 |
| C43H78NO7P  | 1 | [M+H] <sup>+</sup>     | 752.55780 | 751.55159 | 1.422 |
| C42H83NO8   | 1 | [M+Na] <sup>+</sup>    | 752.59930 | 729.61187 | 2.380 |
| C41H69O10P  | 3 | [M+H] <sup>+</sup>     | 753.46650 | 752.46284 | 4.799 |
| C46H66O7    | 1 | [M+Na] <sup>+</sup>    | 753.46650 | 730.48086 | 4.747 |
| C42H73O9P   | 1 | [M+H] <sup>+</sup>     | 753.50960 | 752.49922 | 4.113 |
| C41H83N2O6P | 1 | [M+Na] <sup>+</sup>    | 753.58990 | 730.59888 | 2.393 |
| C41H66NO8P  | 1 | [M+Na] <sup>+</sup>    | 754.44540 | 731.45261 | 4.735 |
| C38H70NO10P | 1 | [M+Na] <sup>+</sup>    | 754.46050 | 731.47374 | 3.258 |
| C40H68NO10P | 2 | [M+H] <sup>+</sup>     | 754.46750 | 753.45809 | 2.831 |
| C39H74NO9P  | 4 | [M+Na] <sup>+</sup>    | 754.50230 | 731.51012 | 3.918 |
| C43H74NO6P  | 1 | [M+Na] <sup>+</sup>    | 754.51370 | 731.52538 | 1.191 |
| C42H76NO8P  | 5 | [M+H] <sup>+</sup>     | 754.53850 | 753.53086 | 0.484 |
| C42H86NO6P  | 4 | [M+Na] <sup>+</sup>    | 754.60690 | 731.61928 | 2.119 |
| C44H84NO6P  | 1 | [M+H] <sup>+</sup>     | 754.60780 | 753.60363 | 4.115 |
| C37H64O13   | 2 | [M+K] <sup>+</sup>     | 755.39580 | 716.43470 | 2.709 |
| C46H68O6    | 1 | [M+K] <sup>+</sup>     | 755.46280 | 716.50159 | 2.569 |
| C42H69O8P   | 1 | [M+Na] <sup>+</sup>    | 755.46280 | 732.47301 | 0.755 |
| C37H72O11P2 | 1 | [M+H] <sup>+</sup>     | 755.46280 | 754.45499 | 0.704 |
| C39H73O9P   | 1 | [M+K] <sup>+</sup>     | 755.46280 | 716.49922 | 0.564 |
| C41H71O10P  | 6 | [M+H] <sup>+</sup>     | 755.48230 | 754.47849 | 4.588 |



|             |   |                     |           |           |       |
|-------------|---|---------------------|-----------|-----------|-------|
| C39H73O10P  | 5 | [M+Na] <sup>+</sup> | 755.48440 | 732.49414 | 1.377 |
| C47H72O5    | 2 | [M+K] <sup>+</sup>  | 755.50340 | 716.53798 | 3.010 |
| C38H75O12P  | 4 | [M+H] <sup>+</sup>  | 755.50460 | 754.49962 | 3.039 |
| C40H81N2O6P | 2 | [M+K] <sup>+</sup>  | 755.54280 | 716.58323 | 4.733 |
| C43H78O10   | 1 | [M+H] <sup>+</sup>  | 755.56580 | 754.55950 | 1.294 |
| C46H84O5    | 1 | [M+K] <sup>+</sup>  | 755.59690 | 716.63188 | 2.480 |
| C37H68NO10P | 1 | [M+K] <sup>+</sup>  | 756.42410 | 717.45809 | 3.785 |
| C38H72NO9P  | 1 | [M+K] <sup>+</sup>  | 756.45950 | 717.49447 | 2.481 |
| C40H70NO10P | 3 | [M+H] <sup>+</sup>  | 756.48280 | 755.47374 | 2.361 |
| C39H76NO9P  | 3 | [M+Na] <sup>+</sup> | 756.51370 | 733.52577 | 1.710 |
| C42H78NO8P  | 4 | [M+H] <sup>+</sup>  | 756.55230 | 755.54651 | 1.963 |
| C44H85NO8   | 1 | [M+H] <sup>+</sup>  | 756.63290 | 755.62752 | 2.507 |
| C39H75O9P   | 1 | [M+K] <sup>+</sup>  | 757.47620 | 718.51487 | 2.408 |
| C41H73O10P  | 6 | [M+H] <sup>+</sup>  | 757.49880 | 756.49414 | 3.453 |
| C39H75O10P  | 4 | [M+Na] <sup>+</sup> | 757.49910 | 734.50979 | 0.119 |
| C47H74O5    | 1 | [M+K] <sup>+</sup>  | 757.51510 | 718.55363 | 2.212 |
| C43H75O7P   | 2 | [M+Na] <sup>+</sup> | 757.51510 | 734.52504 | 1.102 |
| C41H83O7P   | 1 | [M+K] <sup>+</sup>  | 757.55290 | 718.58764 | 2.780 |
| C46H86O5    | 1 | [M+K] <sup>+</sup>  | 757.60900 | 718.64753 | 2.214 |
| C51H90O2    | 1 | [M+Na] <sup>+</sup> | 757.68080 | 734.69408 | 3.303 |
| C41H70NO8P  | 2 | [M+Na] <sup>+</sup> | 758.47180 | 735.48391 | 1.751 |
| C38H74NO9P  | 1 | [M+K] <sup>+</sup>  | 758.47580 | 719.51012 | 3.332 |
| C43H68NO8P  | 3 | [M+H] <sup>+</sup>  | 758.47580 | 757.46826 | 0.351 |
| C40H74NO10P | 1 | [M-H] <sup>-</sup>  | 758.49760 | 759.50504 | 0.221 |
| C39H78NO8P  | 3 | [M+K] <sup>+</sup>  | 758.50830 | 719.54651 | 1.790 |
| C39H78NO9P  | 1 | [M+Na] <sup>+</sup> | 758.52760 | 735.54142 | 4.013 |
| C41H78NO9P  | 1 | [M-H] <sup>-</sup>  | 758.53520 | 759.54142 | 1.380 |
| C40H82NO7P  | 1 | [M+K] <sup>+</sup>  | 758.54400 | 719.58289 | 2.693 |
| C42H80NO8P  | 2 | [M+H] <sup>+</sup>  | 758.56730 | 757.56216 | 2.815 |
| C43H84NO7P  | 1 | [M+H] <sup>+</sup>  | 758.60690 | 757.59854 | 1.424 |
| C42H73O8P   | 3 | [M+Na] <sup>+</sup> | 759.49640 | 736.50431 | 3.779 |
| C39H77O9P   | 3 | [M+K] <sup>+</sup>  | 759.49640 | 720.53052 | 3.589 |
| C39H77O8PS  | 3 | [M+Na] <sup>+</sup> | 759.49640 | 736.50768 | 0.661 |
| C41H75O10P  | 2 | [M+H] <sup>+</sup>  | 759.52060 | 758.50979 | 4.653 |
| C37H72NO10P | 1 | [M+K] <sup>+</sup>  | 760.45190 | 721.48939 | 0.839 |
| C41H72NO7P  | 3 | [M+K] <sup>+</sup>  | 760.47050 | 721.50464 | 3.561 |
| C43H70NO8P  | 4 | [M+H] <sup>+</sup>  | 760.48800 | 759.48391 | 4.187 |
| C38H76NO9P  | 5 | [M+K] <sup>+</sup>  | 760.48800 | 721.52577 | 1.214 |
| C40H74NO10P | 1 | [M+H] <sup>+</sup>  | 760.51490 | 759.50504 | 3.399 |
| C42H82NO8P  | 3 | [M+H] <sup>+</sup>  | 760.58550 | 759.57781 | 0.546 |
| C40H66O12   | 1 | [M+Na] <sup>+</sup> | 761.44320 | 738.45543 | 1.907 |
| C39H79O9P   | 1 | [M+K] <sup>+</sup>  | 761.50720 | 722.54617 | 2.789 |
| C42H75O8P   | 1 | [M+Na] <sup>+</sup> | 761.50720 | 738.51996 | 2.600 |
| C44H73O8P   | 1 | [M+H] <sup>+</sup>  | 761.51530 | 760.50431 | 4.877 |
| C41H77O10P  | 1 | [M+H] <sup>+</sup>  | 761.53440 | 760.52544 | 2.211 |
| C42H81O9P   | 1 | [M+H] <sup>+</sup>  | 761.57280 | 760.56182 | 4.857 |
| C41H73NO9   | 2 | [M+K] <sup>+</sup>  | 762.49110 | 723.52854 | 0.767 |
| C43H72NO8P  | 4 | [M+H] <sup>+</sup>  | 762.50410 | 761.49956 | 3.586 |
| C40H76NO10P | 3 | [M+H] <sup>+</sup>  | 762.52540 | 761.52069 | 3.364 |
| C41H80NO9P  | 1 | [M+H] <sup>+</sup>  | 762.56420 | 761.55707 | 0.197 |
| C36H52O15   | 1 | [M+K] <sup>+</sup>  | 763.29260 | 724.33063 | 1.541 |
| C39H64O13   | 1 | [M+Na] <sup>+</sup> | 763.42130 | 740.43470 | 3.428 |
| C42H67O10P  | 3 | [M+H] <sup>+</sup>  | 763.45180 | 762.44719 | 3.492 |

|             |   |            |           |           |       |
|-------------|---|------------|-----------|-----------|-------|
| C41H73O8P   | 1 | [M+K]+     | 763.46640 | 724.50431 | 1.387 |
| C41H79N2O6P | 1 | [M-2H+K]-  | 763.51290 | 726.56758 | 4.291 |
| C42H77O8P   | 2 | [M+Na]+    | 763.52210 | 740.53561 | 3.576 |
| C41H79O10P  | 1 | [M+H]+     | 763.55130 | 762.54109 | 3.843 |
| C43H81O7P   | 1 | [M+Na]+    | 763.56500 | 740.57199 | 4.957 |
| C45H79O7P   | 1 | [M+H]+     | 763.56500 | 762.55634 | 1.806 |
| C47H80O5    | 1 | [M+K]+     | 763.56500 | 724.60058 | 1.668 |
| C42H83O9P   | 1 | [M+H]+     | 763.58530 | 762.57747 | 0.719 |
| C40H72NO9P  | 1 | [M+Na]+    | 764.48200 | 741.49447 | 2.216 |
| C41H75NO9   | 2 | [M+K]+     | 764.50910 | 725.54419 | 2.309 |
| C41H76NO8P  | 2 | [M+Na]+    | 764.52130 | 741.53086 | 1.597 |
| C43H74NO8P  | 3 | [M+H]+     | 764.52510 | 763.51521 | 3.420 |
| C42H80NO6P  | 1 | [M+K]+     | 764.53300 | 725.57233 | 3.241 |
| C41H64O13   | 2 | [M+H]+     | 765.44530 | 764.43470 | 4.347 |
| C40H71O9P   | 1 | [M+K]+     | 765.44690 | 726.48357 | 0.230 |
| C38H68O15   | 3 | [M+H]+     | 765.46600 | 764.45583 | 3.785 |
| C42H69O10P  | 5 | [M+H]+     | 765.46710 | 764.46284 | 3.940 |
| C39H73O12P  | 2 | [M+H]+     | 765.48990 | 764.48397 | 1.758 |
| C41H79N2O6P | 1 | [M+K]+     | 765.53380 | 726.56758 | 4.016 |
| C42H79O8P   | 1 | [M+Na]+    | 765.53710 | 742.55126 | 4.415 |
| C41H81O10P  | 2 | [M+H]+     | 765.56300 | 764.55674 | 1.327 |
| C41H78NO7P  | 1 | [M+K]+     | 766.51650 | 727.55159 | 2.292 |
| C43H76NO8P  | 6 | [M+H]+     | 766.53750 | 765.53086 | 0.828 |
| C42H81NO8   | 1 | [M+K]+     | 766.55770 | 727.59622 | 2.179 |
| C38H71O13P  | 3 | [M+H]+     | 767.47210 | 766.46323 | 2.070 |
| C45H66O10   | 3 | [M+H]+     | 767.47210 | 766.46560 | 1.014 |
| C42H71O10P  | 4 | [M+H]+     | 767.48470 | 766.47849 | 1.389 |
| C39H75O12P  | 1 | [M+H]+     | 767.50890 | 766.49962 | 2.611 |
| C41H81N2O6P | 1 | [M+K]+     | 767.54260 | 728.58323 | 4.920 |
| C42H81O8P   | 1 | [M+Na]+    | 767.55380 | 744.56691 | 3.036 |
| C42H59N5O6  | 1 | [M+K]+     | 768.40790 | 729.44654 | 2.323 |
| C42H70NO8P  | 1 | [M-2H+Na]- | 768.45770 | 747.48391 | 1.128 |
| C43H72NO7P  | 2 | [M+Na]+    | 768.49360 | 745.50464 | 0.342 |
| C40H76NO9P  | 3 | [M+Na]+    | 768.51640 | 745.52577 | 1.830 |
| C42H74NO9P  | 5 | [M+H]+     | 768.51930 | 767.51012 | 2.472 |
| C41H80NO8P  | 2 | [M+Na]+    | 768.55490 | 745.56216 | 4.581 |
| C43H78NO8P  | 5 | [M+H]+     | 768.55490 | 767.54651 | 1.451 |
| C45H86NO6P  | 2 | [M+H]+     | 768.62560 | 767.61928 | 1.242 |
| C43H71O8P   | 1 | [M+Na]+    | 769.47920 | 746.48866 | 1.715 |
| C40H75O9P   | 1 | [M+K]+     | 769.47920 | 730.51487 | 1.528 |
| C45H69O8P   | 1 | [M+H]+     | 769.47920 | 768.47301 | 1.411 |
| C43H70O10   | 1 | [M+Na]+    | 769.48830 | 746.49690 | 2.830 |
| C38H73O13P  | 1 | [M+H]+     | 769.48830 | 768.47888 | 2.780 |
| C45H68O10   | 1 | [M+H]+     | 769.48830 | 768.48125 | 0.296 |
| C40H75O10P  | 4 | [M+Na]+    | 769.50140 | 746.50979 | 3.106 |
| C47H70O7    | 4 | [M+Na]+    | 769.50140 | 746.51220 | 0.027 |
| C42H73O10P  | 5 | [M+H]+     | 769.50140 | 768.49414 | 0.021 |
| C41H79O8P   | 1 | [M+K]+     | 769.51810 | 730.55126 | 4.797 |
| C42H83O7P   | 1 | [M+K]+     | 769.55440 | 730.58764 | 4.686 |
| C41H83N2O6P | 2 | [M+K]+     | 769.55930 | 730.59888 | 3.542 |
| C43H74NO6P  | 1 | [M+K]+     | 770.49170 | 731.52538 | 4.117 |
| C39H74NO10P | 4 | [M+Na]+    | 770.49170 | 747.50504 | 3.321 |
| C41H72NO10P | 2 | [M+H]+     | 770.49360 | 769.48939 | 3.978 |

|             |   |         |           |           |       |
|-------------|---|---------|-----------|-----------|-------|
| C43H74NO7P  | 3 | [M+Na]+ | 770.50670 | 747.52029 | 3.652 |
| C40H78NO9P  | 2 | [M+Na]+ | 770.52760 | 747.54142 | 3.951 |
| C42H76NO9P  | 1 | [M+H]+  | 770.53440 | 769.52577 | 1.752 |
| C41H82NO7P  | 1 | [M+K]+  | 770.54250 | 731.58289 | 4.598 |
| C42H86NO7P  | 2 | [M+Na]+ | 770.60090 | 747.61419 | 3.262 |
| C44H84NO7P  | 1 | [M+H]+  | 770.60310 | 769.59854 | 3.530 |
| C42H69O8P   | 1 | [M+K]+  | 771.43600 | 732.47301 | 0.206 |
| C40H66O14   | 1 | [M+H]+  | 771.45300 | 770.44526 | 0.599 |
| C43H73O7P   | 1 | [M+K]+  | 771.47380 | 732.50939 | 1.628 |
| C43H73O8P   | 4 | [M+Na]+ | 771.48980 | 748.50431 | 4.835 |
| C40H77O9P   | 3 | [M+K]+  | 771.49580 | 732.53052 | 2.756 |
| C45H71O8P   | 2 | [M+H]+  | 771.49580 | 770.48866 | 0.176 |
| C45H70O10   | 2 | [M+H]+  | 771.50270 | 770.49690 | 1.916 |
| C40H77O10P  | 5 | [M+Na]+ | 771.51630 | 748.52544 | 2.126 |
| C42H75O10P  | 6 | [M+H]+  | 771.51630 | 770.50979 | 0.993 |
| C41H81O8P   | 3 | [M+K]+  | 771.53180 | 732.56691 | 2.257 |
| C41H81O9P   | 1 | [M+Na]+ | 771.55210 | 748.56182 | 1.367 |
| C41H85N2O6P | 3 | [M+K]+  | 771.57800 | 732.61453 | 0.420 |
| C44H83O8P   | 1 | [M+H]+  | 771.59260 | 770.58256 | 3.582 |
| C42H72NO8P  | 2 | [M+Na]+ | 772.48870 | 749.49956 | 0.101 |
| C39H76NO10P | 1 | [M+Na]+ | 772.50840 | 749.52069 | 1.953 |
| C43H76NO7P  | 1 | [M+Na]+ | 772.52140 | 749.53594 | 4.872 |
| C42H78NO9P  | 1 | [M+H]+  | 772.54770 | 771.54142 | 1.294 |
| C41H84NO7P  | 1 | [M+K]+  | 772.55970 | 733.59854 | 2.580 |
| C46H78NO6P  | 1 | [M+H]+  | 772.56520 | 771.55668 | 1.612 |
| C43H82NO8P  | 4 | [M+H]+  | 772.58760 | 771.57781 | 3.255 |
| C42H88NO6P  | 2 | [M+K]+  | 772.59770 | 733.63493 | 0.489 |
| C37H67O13P  | 1 | [M+Na]+ | 773.42280 | 750.43193 | 2.127 |
| C48H68O8    | 1 | [M+H]+  | 773.50030 | 772.49142 | 2.071 |
| C45H72O10   | 3 | [M+H]+  | 773.52340 | 772.51255 | 4.618 |
| C40H79O10P  | 1 | [M+Na]+ | 773.53400 | 750.54109 | 4.770 |
| C42H79O10P  | 2 | [M-H]-  | 773.53400 | 774.54109 | 0.234 |
| C42H77O10P  | 2 | [M+H]+  | 773.53600 | 772.52544 | 4.245 |
| C41H70NO8P  | 1 | [M+K]+  | 774.45080 | 735.48391 | 4.833 |
| C39H78NO9P  | 4 | [M+K]+  | 774.50300 | 735.54142 | 2.031 |
| C44H72NO8P  | 5 | [M+H]+  | 774.50400 | 773.49956 | 3.659 |
| C41H76NO10P | 3 | [M+H]+  | 774.52720 | 773.52069 | 0.988 |
| C43H78NO7P  | 1 | [M+Na]+ | 774.53820 | 751.55159 | 3.375 |
| C47H66O9    | 1 | [M+H]+  | 775.47720 | 774.47070 | 1.002 |
| C42H73O9P   | 1 | [M+Na]+ | 775.48620 | 752.49922 | 2.895 |
| C44H71O9P   | 1 | [M+H]+  | 775.49400 | 774.48357 | 4.061 |
| C43H77O7P   | 3 | [M+K]+  | 775.50760 | 736.54069 | 4.843 |
| C40H68NO10P | 1 | [M+Na]+ | 776.44560 | 753.45809 | 2.200 |
| C44H74NO8P  | 3 | [M+H]+  | 776.52060 | 775.51521 | 2.427 |
| C44H84NO6P  | 1 | [M+Na]+ | 776.58900 | 753.60363 | 4.956 |
| C40H66O12   | 1 | [M+K]+  | 777.41550 | 738.45543 | 3.963 |
| C42H75O8P   | 1 | [M+K]+  | 777.48360 | 738.51996 | 0.632 |
| C38H75O12P  | 1 | [M+Na]+ | 777.49130 | 754.49962 | 3.164 |
| C43H79O7P   | 3 | [M+K]+  | 777.52130 | 738.55634 | 2.323 |
| C42H68NO10P | 1 | [M+H]+  | 778.46180 | 777.45809 | 4.578 |
| C44H76NO8P  | 2 | [M+H]+  | 778.54020 | 777.53086 | 2.652 |
| C43H82NO7P  | 1 | [M+Na]+ | 778.57550 | 755.58289 | 4.349 |
| C45H80NO7P  | 2 | [M+H]+  | 778.57770 | 777.56724 | 4.084 |

|             |   |                        |           |           |       |
|-------------|---|------------------------|-----------|-----------|-------|
| C36H69O13P  | 1 | [M+K] <sup>+</sup>     | 779.41290 | 740.44758 | 2.779 |
| C43H71O10P  | 3 | [M+H] <sup>+</sup>     | 779.48240 | 778.47849 | 4.318 |
| C45H79O8P   | 1 | [M+H] <sup>+</sup>     | 779.55640 | 778.55126 | 2.740 |
| C43H81O8P   | 1 | [M+Na] <sup>+</sup>    | 779.55640 | 756.56691 | 0.346 |
| C43H68NO8P  | 1 | [M+Na] <sup>+</sup>    | 780.46090 | 757.46826 | 4.385 |
| C40H72NO9P  | 1 | [M+K] <sup>+</sup>     | 780.46090 | 741.49447 | 4.199 |
| C42H70NO10P | 2 | [M+H] <sup>+</sup>     | 780.48460 | 779.47374 | 4.595 |
| C41H76NO9P  | 1 | [M+Na] <sup>+</sup>    | 780.51270 | 757.52577 | 2.939 |
| C40H77NO11S | 1 | [M+H] <sup>+</sup>     | 780.53230 | 779.52174 | 4.209 |
| C45H76NO6P  | 1 | [M+Na] <sup>+</sup>    | 780.53230 | 757.54103 | 2.628 |
| C44H78NO8P  | 5 | [M+H] <sup>+</sup>     | 780.55600 | 779.54651 | 2.838 |
| C41H64O14   | 2 | [M+H] <sup>+</sup>     | 781.44010 | 780.42961 | 4.110 |
| C39H73O13P  | 2 | [M+H] <sup>+</sup>     | 781.48840 | 780.47888 | 2.865 |
| C43H73O10P  | 1 | [M+H] <sup>+</sup>     | 781.49920 | 780.49414 | 2.836 |
| C41H75O10P  | 1 | [M+Na] <sup>+</sup>    | 781.49920 | 758.50979 | 0.243 |
| C42H79O8P   | 1 | [M+K] <sup>+</sup>     | 781.51750 | 742.55126 | 3.955 |
| C40H74NO10P | 1 | [M+Na] <sup>+</sup>    | 782.49240 | 759.50504 | 2.376 |
| C41H77NO10  | 2 | [M+K] <sup>+</sup>     | 782.51450 | 743.55475 | 4.345 |
| C41H78NO9P  | 4 | [M+Na] <sup>+</sup>    | 782.53140 | 759.54142 | 0.966 |
| C44H80NO8P  | 2 | [M+H] <sup>+</sup>     | 782.56760 | 781.56216 | 2.345 |
| C43H69O8P   | 1 | [M+K] <sup>+</sup>     | 783.43750 | 744.47301 | 1.712 |
| C43H68O11   | 1 | [M+Na] <sup>+</sup>    | 783.46200 | 760.47617 | 4.323 |
| C41H77O10P  | 4 | [M+Na] <sup>+</sup>    | 783.51460 | 760.52544 | 0.077 |
| C43H75O10P  | 5 | [M+H] <sup>+</sup>     | 783.51660 | 782.50979 | 0.595 |
| C43H77O10P  | 1 | [M-H] <sup>-</sup>     | 783.52110 | 784.52544 | 3.741 |
| C44H79O9P   | 1 | [M+H] <sup>+</sup>     | 783.55000 | 782.54617 | 4.404 |
| C45H70NO8P  | 1 | [M+H] <sup>+</sup>     | 784.49450 | 783.48391 | 4.227 |
| C42H74NO10P | 1 | [M+H] <sup>+</sup>     | 784.50990 | 783.50504 | 3.078 |
| C41H82NO9P  | 1 | [M-2H+Na] <sup>-</sup> | 784.54390 | 763.57272 | 4.440 |
| C42H84NO8P  | 2 | [M+Na] <sup>+</sup>    | 784.58500 | 761.59346 | 2.958 |
| C44H82NO8P  | 3 | [M+H] <sup>+</sup>     | 784.58500 | 783.57781 | 0.108 |
| C45H86NO7P  | 1 | [M+H] <sup>+</sup>     | 784.62340 | 783.61419 | 2.460 |
| C36H64O18   | 1 | [M+H] <sup>+</sup>     | 785.41550 | 784.40927 | 1.334 |
| C44H75O8P   | 1 | [M+Na] <sup>+</sup>    | 785.51210 | 762.51996 | 3.717 |
| C41H79O9P   | 1 | [M+K] <sup>+</sup>     | 785.51210 | 746.54617 | 3.534 |
| C41H79O10P  | 4 | [M+Na] <sup>+</sup>    | 785.53160 | 762.54109 | 1.642 |
| C43H77O10P  | 5 | [M+H] <sup>+</sup>     | 785.53400 | 784.52544 | 1.635 |
| C56H80O2    | 1 | [M+H] <sup>+</sup>     | 785.62660 | 784.61583 | 4.445 |
| C43H74NO7P  | 1 | [M+K] <sup>+</sup>     | 786.48020 | 747.52029 | 4.123 |
| C43H74NO8P  | 1 | [M+Na] <sup>+</sup>    | 786.50830 | 763.51521 | 4.922 |
| C40H78NO9P  | 1 | [M+K] <sup>+</sup>     | 786.50830 | 747.54142 | 4.739 |
| C45H72NO8P  | 1 | [M+H] <sup>+</sup>     | 786.50830 | 785.49956 | 1.864 |
| C41H82NO8P  | 2 | [M+K] <sup>+</sup>     | 786.53780 | 747.57781 | 4.015 |
| C44H78NO7P  | 2 | [M+Na] <sup>+</sup>    | 786.53780 | 763.55159 | 3.832 |
| C46H76NO7P  | 1 | [M+H] <sup>+</sup>     | 786.54000 | 785.53594 | 4.094 |
| C43H82NO9P  | 2 | [M-H] <sup>-</sup>     | 786.56440 | 787.57272 | 1.339 |
| C44H84NO8P  | 3 | [M+H] <sup>+</sup>     | 786.60170 | 785.59346 | 1.227 |
| C38H69O13P  | 1 | [M+Na] <sup>+</sup>    | 787.43540 | 764.44758 | 1.784 |
| C39H76NO10P | 1 | [M+K] <sup>+</sup>     | 788.48200 | 749.52069 | 2.331 |
| C42H72NO9P  | 2 | [M+Na] <sup>+</sup>    | 788.48300 | 765.49447 | 0.880 |
| C43H76NO7P  | 2 | [M+K] <sup>+</sup>     | 788.49740 | 749.53594 | 2.147 |
| C45H74NO8P  | 5 | [M+H] <sup>+</sup>     | 788.52000 | 787.51521 | 3.151 |
| C42H75N3O8  | 3 | [M+K] <sup>+</sup>     | 788.52000 | 749.55542 | 1.817 |

|             |   |         |           |           |       |
|-------------|---|---------|-----------|-----------|-------|
| C40H80NO9P  | 4 | [M+K]+  | 788.52000 | 749.55707 | 0.283 |
| C42H78NO10P | 1 | [M+H]+  | 788.54440 | 787.53634 | 0.996 |
| C43H82NO9P  | 1 | [M+H]+  | 788.57740 | 787.57272 | 3.297 |
| C44H86NO8P  | 2 | [M+H]+  | 788.61650 | 787.60911 | 0.146 |
| C40H68O15   | 1 | [M+H]+  | 789.46120 | 788.45583 | 2.410 |
| C44H69O10P  | 1 | [M+H]+  | 789.46740 | 788.46284 | 3.440 |
| C42H71O10P  | 1 | [M+Na]+ | 789.46740 | 766.47849 | 0.393 |
| C39H75O12P  | 2 | [M+Na]+ | 789.48740 | 766.49962 | 1.824 |
| C46H77O8P   | 1 | [M+H]+  | 789.53940 | 788.53561 | 4.415 |
| C41H83O9P   | 1 | [M+K]+  | 789.53940 | 750.57747 | 1.550 |
| C44H79O8P   | 1 | [M+Na]+ | 789.53940 | 766.55126 | 1.368 |
| C44H87O9P   | 1 | [M-H]-  | 789.59940 | 790.60877 | 2.665 |
| C44H85O9P   | 1 | [M+H]+  | 789.60040 | 788.59312 | 0.001 |
| C45H89O8P   | 1 | [M+H]+  | 789.63860 | 788.62951 | 2.297 |
| C45H76NO8P  | 2 | [M+H]+  | 790.53760 | 789.53086 | 0.677 |
| C45H85NO8   | 1 | [M+Na]+ | 790.61420 | 767.62752 | 3.214 |
| C42H73O9P   | 1 | [M+K]+  | 791.46610 | 752.49922 | 4.708 |
| C38H73O13P  | 1 | [M+Na]+ | 791.46610 | 768.47888 | 2.533 |
| C44H71O10P  | 5 | [M+H]+  | 791.48290 | 790.47849 | 3.621 |
| C43H77O8P   | 1 | [M+K]+  | 791.49690 | 752.53561 | 2.349 |
| C44H81O8P   | 1 | [M+Na]+ | 791.55220 | 768.56691 | 4.965 |
| C40H68NO10P | 1 | [M+K]+  | 792.41960 | 753.45809 | 2.066 |
| C43H70NO10P | 1 | [M+H]+  | 792.47830 | 791.47374 | 3.425 |
| C41H72NO10P | 1 | [M+Na]+ | 792.47830 | 769.48939 | 0.390 |
| C41H75O12S  | 1 | [M+H]+  | 792.50460 | 791.49790 | 0.728 |
| C42H76NO9P  | 1 | [M+Na]+ | 792.51880 | 769.52577 | 4.802 |
| C44H74NO9P  | 2 | [M+H]+  | 792.51880 | 791.51012 | 1.767 |
| C45H78NO8P  | 2 | [M+H]+  | 792.55730 | 791.54651 | 4.435 |
| C44H84NO7P  | 1 | [M+Na]+ | 792.59090 | 769.59854 | 3.957 |
| C46H82NO7P  | 1 | [M+H]+  | 792.59090 | 791.58289 | 0.921 |
| C43H86NO9P  | 1 | [M+H]+  | 792.61300 | 791.60402 | 2.145 |
| C45H87NO8   | 1 | [M+Na]+ | 792.63590 | 769.64317 | 4.427 |
| C40H66O14   | 2 | [M+Na]+ | 793.43580 | 770.44526 | 1.661 |
| C42H64O14   | 2 | [M+H]+  | 793.43580 | 792.42961 | 1.371 |
| C42H75O9P   | 1 | [M+K]+  | 793.47560 | 754.51487 | 3.055 |
| C47H69O8P   | 2 | [M+H]+  | 793.48380 | 792.47301 | 4.429 |
| C40H73O13P  | 2 | [M+H]+  | 793.48380 | 792.47888 | 2.975 |
| C45H70O10   | 1 | [M+Na]+ | 793.48600 | 770.49690 | 0.154 |
| C44H73O10P  | 5 | [M+H]+  | 793.49830 | 792.49414 | 3.927 |
| C43H79O8P   | 1 | [M+K]+  | 793.51430 | 754.55126 | 0.137 |
| C41H77O12P  | 2 | [M+H]+  | 793.52380 | 792.51527 | 1.580 |
| C43H78O10   | 1 | [M+K]+  | 793.52440 | 754.55950 | 2.204 |
| C43H83N2O6P | 1 | [M+K]+  | 793.56580 | 754.59888 | 4.756 |
| C44H87N2O6P | 1 | [M+Na]+ | 793.62200 | 770.63018 | 3.280 |
| C41H77O12S  | 1 | [M+H]+  | 794.52380 | 793.51360 | 3.679 |
| C42H78NO9P  | 2 | [M+Na]+ | 794.52710 | 771.54142 | 4.460 |
| C43H82NO8P  | 1 | [M+Na]+ | 794.56960 | 771.57781 | 3.236 |
| C45H80NO8P  | 5 | [M+H]+  | 794.56960 | 793.56216 | 0.208 |
| C40H75O13P  | 3 | [M+H]+  | 795.50540 | 794.49453 | 4.512 |
| C43H81O9P   | 2 | [M+Na]+ | 795.55050 | 772.56182 | 0.685 |
| C43H85N2O6P | 3 | [M+K]+  | 795.57910 | 756.61453 | 1.790 |
| C44H89N2O6P | 1 | [M+Na]+ | 795.63390 | 772.64583 | 1.442 |
| C45H76NO6P  | 1 | [M+K]+  | 796.50720 | 757.54103 | 3.794 |

|             |   |                        |           |           |       |
|-------------|---|------------------------|-----------|-----------|-------|
| C41H76NO10P | 1 | [M+Na] <sup>+</sup>    | 796.51280 | 773.52069 | 3.630 |
| C43H74NO10P | 2 | [M+H] <sup>+</sup>     | 796.51280 | 795.50504 | 0.609 |
| C42H82NO8P  | 1 | [M-2H+K] <sup>-</sup>  | 796.52630 | 759.57781 | 0.136 |
| C45H78NO7P  | 1 | [M-2H+Na] <sup>-</sup> | 796.52630 | 775.55159 | 0.059 |
| C44H78NO9P  | 3 | [M+H] <sup>+</sup>     | 796.54630 | 795.54142 | 3.013 |
| C42H80NO9P  | 3 | [M+Na] <sup>+</sup>    | 796.54630 | 773.55707 | 0.008 |
| C43H84NO8P  | 1 | [M+Na] <sup>+</sup>    | 796.58410 | 773.59346 | 1.784 |
| C45H82NO8P  | 1 | [M+H] <sup>+</sup>     | 796.58410 | 795.57781 | 1.237 |
| C44H88NO6P  | 1 | [M+K] <sup>+</sup>     | 796.59870 | 757.63493 | 0.781 |
| C44H87NO8   | 1 | [M+K] <sup>+</sup>     | 796.60570 | 757.64317 | 0.778 |
| C44H88NO7P  | 1 | [M+Na] <sup>+</sup>    | 796.61700 | 773.62984 | 2.591 |
| C47H89NO8   | 1 | [M+H] <sup>+</sup>     | 796.66250 | 795.65882 | 4.515 |
| C47H66O9    | 1 | [M+Na] <sup>+</sup>    | 797.45770 | 774.47070 | 2.785 |
| C47H73O8P   | 2 | [M+H] <sup>+</sup>     | 797.50860 | 796.50431 | 3.744 |
| C42H79O9P   | 2 | [M+K] <sup>+</sup>     | 797.50860 | 758.54617 | 0.908 |
| C45H75O8P   | 2 | [M+Na] <sup>+</sup>    | 797.50860 | 774.51996 | 0.727 |
| C45H74O10   | 2 | [M+Na] <sup>+</sup>    | 797.52100 | 774.52820 | 4.486 |
| C40H77O13P  | 2 | [M+H] <sup>+</sup>     | 797.52100 | 796.51018 | 4.438 |
| C47H72O10   | 2 | [M+H] <sup>+</sup>     | 797.52100 | 796.51255 | 1.470 |
| C42H79O10P  | 5 | [M+Na] <sup>+</sup>    | 797.53390 | 774.54109 | 4.501 |
| C44H77O10P  | 5 | [M+H] <sup>+</sup>     | 797.53390 | 796.52544 | 1.485 |
| C43H83O8P   | 4 | [M+K] <sup>+</sup>     | 797.54950 | 758.58256 | 4.753 |
| C43H83O9P   | 1 | [M+Na] <sup>+</sup>    | 797.56550 | 774.57747 | 1.498 |
| C42H66NO10P | 1 | [M+Na] <sup>+</sup>    | 798.42810 | 775.44244 | 4.456 |
| C43H76NO10P | 3 | [M+H] <sup>+</sup>     | 798.52670 | 797.52069 | 1.584 |
| C41H78NO10P | 3 | [M+Na] <sup>+</sup>    | 798.52670 | 775.53634 | 1.429 |
| C42H82NO8P  | 2 | [M+K] <sup>+</sup>     | 798.53740 | 759.57781 | 4.456 |
| C45H78NO7P  | 3 | [M+Na] <sup>+</sup>    | 798.53740 | 775.55159 | 4.275 |
| C44H90NO7P  | 3 | [M+Na] <sup>+</sup>    | 798.63230 | 775.64549 | 3.023 |
| C46H88NO7P  | 1 | [M+H] <sup>+</sup>     | 798.63430 | 797.62984 | 3.531 |
| C39H69O13P  | 2 | [M+Na] <sup>+</sup>    | 799.44020 | 776.44758 | 4.247 |
| C43H68O11   | 1 | [M+K] <sup>+</sup>     | 799.44020 | 760.47617 | 1.106 |
| C44H73O8P   | 2 | [M+K] <sup>+</sup>     | 799.47050 | 760.50431 | 3.804 |
| C44H73O9P   | 1 | [M+Na] <sup>+</sup>    | 799.49000 | 776.49922 | 1.945 |
| C45H77O8P   | 1 | [M+Na] <sup>+</sup>    | 799.52870 | 776.53561 | 4.840 |
| C42H81O9P   | 1 | [M+K] <sup>+</sup>     | 799.52870 | 760.56182 | 4.660 |
| C47H74O10   | 1 | [M+H] <sup>+</sup>     | 799.53790 | 798.52820 | 3.029 |
| C44H79O10P  | 3 | [M+H] <sup>+</sup>     | 799.54640 | 798.54109 | 2.459 |
| C42H81O10P  | 3 | [M+Na] <sup>+</sup>    | 799.54640 | 776.55674 | 0.550 |
| C46H91N2O6P | 2 | [M+H] <sup>+</sup>     | 799.66870 | 798.66148 | 0.066 |
| C41H80NO10P | 1 | [M+Na] <sup>+</sup>    | 800.54480 | 777.55199 | 4.486 |
| C43H78NO10P | 1 | [M+H] <sup>+</sup>     | 800.54480 | 799.53634 | 1.480 |
| C42H84NO8P  | 1 | [M+K] <sup>+</sup>     | 800.55370 | 761.59346 | 3.632 |
| C45H80NO7P  | 1 | [M+Na] <sup>+</sup>    | 800.55370 | 777.56724 | 3.453 |
| C44H82NO9P  | 1 | [M+H] <sup>+</sup>     | 800.57780 | 799.57272 | 2.748 |
| C42H84NO9P  | 1 | [M+Na] <sup>+</sup>    | 800.57780 | 777.58837 | 0.257 |
| C45H86NO8P  | 1 | [M+H] <sup>+</sup>     | 800.61580 | 799.60911 | 0.731 |
| C40H64O16   | 1 | [M+H] <sup>+</sup>     | 801.43050 | 800.41944 | 4.719 |
| C39H71O13P  | 1 | [M+Na] <sup>+</sup>    | 801.44860 | 778.46323 | 4.810 |
| C44H75O8P   | 1 | [M+K] <sup>+</sup>     | 801.48160 | 762.51996 | 1.883 |
| C44H75O9P   | 2 | [M+Na] <sup>+</sup>    | 801.50100 | 778.51487 | 3.861 |
| C43H87O9P   | 1 | [M+Na] <sup>+</sup>    | 801.59810 | 778.60877 | 0.131 |
| C42H70NO10P | 1 | [M+Na] <sup>+</sup>    | 802.46640 | 779.47374 | 4.289 |

|             |   |                        |           |           |       |
|-------------|---|------------------------|-----------|-----------|-------|
| C44H68NO10P | 1 | [M+H] <sup>+</sup>     | 802.46640 | 801.45809 | 1.291 |
| C43H74NO9P  | 2 | [M+Na] <sup>+</sup>    | 802.50180 | 779.51012 | 3.060 |
| C40H78NO10P | 2 | [M+K] <sup>+</sup>     | 802.50180 | 763.53634 | 2.881 |
| C43H80NO10P | 1 | [M+H] <sup>+</sup>     | 802.56110 | 801.55199 | 2.286 |
| C44H84NO9P  | 1 | [M+H] <sup>+</sup>     | 802.59180 | 801.58837 | 4.797 |
| C39H73O12P  | 1 | [M+K] <sup>+</sup>     | 803.44340 | 764.48397 | 4.629 |
| C40H66O16   | 2 | [M+H] <sup>+</sup>     | 803.44340 | 802.43509 | 1.284 |
| C41H71O13P  | 1 | [M+H] <sup>+</sup>     | 803.46870 | 802.46323 | 2.254 |
| C39H73O13P  | 1 | [M+Na] <sup>+</sup>    | 803.46870 | 780.47888 | 0.741 |
| C40H77O12P  | 1 | [M+Na] <sup>+</sup>    | 803.50460 | 780.51527 | 0.137 |
| C47H79O8P   | 1 | [M+H] <sup>+</sup>     | 803.55520 | 802.55126 | 4.152 |
| C52H76O5    | 1 | [M+Na] <sup>+</sup>    | 803.55520 | 780.56928 | 4.103 |
| C42H85O9P   | 1 | [M+K] <sup>+</sup>     | 803.55520 | 764.59312 | 1.337 |
| C45H81O8P   | 1 | [M+Na] <sup>+</sup>    | 803.55520 | 780.56691 | 1.157 |
| C53H80O4    | 2 | [M+Na] <sup>+</sup>    | 803.59590 | 780.60566 | 1.267 |
| C42H72NO10P | 1 | [M+Na] <sup>+</sup>    | 804.47660 | 781.48939 | 2.497 |
| C45H84NO7P  | 1 | [M+Na] <sup>+</sup>    | 804.58470 | 781.59854 | 3.808 |
| C39H75O12P  | 1 | [M+K] <sup>+</sup>     | 805.46360 | 766.49962 | 1.032 |
| C45H73O10P  | 3 | [M+H] <sup>+</sup>     | 805.49880 | 804.49414 | 3.248 |
| C45H82O10   | 1 | [M+Na] <sup>+</sup>    | 805.58050 | 782.59080 | 0.593 |
| C45H89O9P   | 1 | [M+H] <sup>+</sup>     | 805.62790 | 804.62442 | 4.718 |
| C55H90O     | 1 | [M+K] <sup>+</sup>     | 805.66380 | 766.69917 | 1.841 |
| C45H70NO8P  | 1 | [M+Na] <sup>+</sup>    | 806.47030 | 783.48391 | 3.507 |
| C43H78NO9P  | 1 | [M+Na] <sup>+</sup>    | 806.53220 | 783.54142 | 1.929 |
| C43H80NO9P  | 1 | [M-2H+Na] <sup>-</sup> | 806.53420 | 785.55707 | 3.059 |
| C45H78NO9P  | 1 | [M-H] <sup>-</sup>     | 806.53420 | 807.54142 | 0.058 |
| C46H80NO8P  | 2 | [M+H] <sup>+</sup>     | 806.57270 | 805.56216 | 4.048 |
| C44H88NO9P  | 1 | [M+H] <sup>+</sup>     | 806.63030 | 805.61967 | 4.153 |
| C45H68O10   | 1 | [M+K] <sup>+</sup>     | 807.44140 | 768.48125 | 3.717 |
| C38H73O13P  | 1 | [M+K] <sup>+</sup>     | 807.44140 | 768.47888 | 0.785 |
| C45H75O10P  | 4 | [M+H] <sup>+</sup>     | 807.51560 | 806.50979 | 1.815 |
| C45H85O7P   | 1 | [M+K] <sup>+</sup>     | 807.56690 | 768.60329 | 0.565 |
| C45H78NO9P  | 1 | [M+H] <sup>+</sup>     | 808.54720 | 807.54142 | 1.855 |
| C43H80NO9P  | 1 | [M+Na] <sup>+</sup>    | 808.54720 | 785.55707 | 1.121 |
| C44H84NO8P  | 1 | [M+Na] <sup>+</sup>    | 808.57980 | 785.59346 | 3.561 |
| C46H82NO8P  | 2 | [M+H] <sup>+</sup>     | 808.58460 | 807.57781 | 0.600 |
| C39H62O15   | 1 | [M+K] <sup>+</sup>     | 809.37190 | 770.40888 | 0.156 |
| C40H66O14   | 1 | [M+K] <sup>+</sup>     | 809.40970 | 770.44526 | 1.593 |
| C43H81O9P   | 1 | [M-2H+K] <sup>-</sup>  | 809.50970 | 772.56182 | 0.894 |
| C46H77O8P   | 1 | [M-2H+Na] <sup>-</sup> | 809.50970 | 788.53561 | 0.703 |
| C41H77O13P  | 1 | [M+H] <sup>+</sup>     | 809.51980 | 808.51018 | 2.889 |
| C44H83O9P   | 2 | [M+Na] <sup>+</sup>    | 809.56470 | 786.57747 | 2.464 |
| C45H91N2O6P | 1 | [M+Na] <sup>+</sup>    | 809.64880 | 786.66148 | 2.343 |
| C41H74NO10P | 1 | [M+K] <sup>+</sup>     | 810.47140 | 771.50504 | 3.963 |
| C44H86NO7P  | 1 | [M+K] <sup>+</sup>     | 810.57990 | 771.61419 | 3.155 |
| C42H83O12P  | 1 | [M+H] <sup>+</sup>     | 811.56640 | 810.56222 | 3.815 |
| C45H93N2O6P | 1 | [M+Na] <sup>+</sup>    | 811.66860 | 788.67713 | 2.775 |
| C47H91N2O6P | 1 | [M+H] <sup>+</sup>     | 811.66860 | 810.66148 | 0.189 |
| C46H79NO8   | 2 | [M+K] <sup>+</sup>     | 812.54110 | 773.58057 | 3.224 |
| C44H78NO10P | 2 | [M+H] <sup>+</sup>     | 812.54110 | 811.53634 | 3.095 |
| C42H80NO10P | 2 | [M+Na] <sup>+</sup>    | 812.54110 | 789.55199 | 0.134 |
| C44H88NO7P  | 1 | [M+K] <sup>+</sup>     | 812.58920 | 773.62984 | 4.668 |
| C45H92NO7P  | 2 | [M+Na] <sup>+</sup>    | 812.65190 | 789.66114 | 1.890 |

|               |   |                        |           |           |       |
|---------------|---|------------------------|-----------|-----------|-------|
| C47H90NO7P    | 2 | [M+H] <sup>+</sup>     | 812.65190 | 811.64549 | 1.071 |
| C45H74O10     | 1 | [M+K] <sup>+</sup>     | 813.48990 | 774.52820 | 1.784 |
| C46H87O9P     | 1 | [M-H] <sup>-</sup>     | 813.59750 | 814.60877 | 4.921 |
| C44H89O9P     | 1 | [M-2H+Na] <sup>-</sup> | 813.59750 | 792.62442 | 1.947 |
| C29H51N3O18P2 | 1 | [M+Na] <sup>+</sup>    | 814.25570 | 791.26429 | 2.686 |
| C41H75O12S    | 1 | [M+Na] <sup>+</sup>    | 814.48310 | 791.49790 | 4.937 |
| C44H76NO9P    | 1 | [M-2H+Na] <sup>-</sup> | 814.50250 | 793.52577 | 2.538 |
| C41H80NO10P   | 1 | [M-2H+K] <sup>-</sup>  | 814.50250 | 777.55199 | 2.347 |
| C41H77O12P    | 1 | [M+Na] <sup>+</sup>    | 815.50160 | 792.51527 | 3.544 |
| C45H77O8P     | 1 | [M+K] <sup>+</sup>     | 815.50160 | 776.53561 | 3.484 |
| C42H81O10P    | 1 | [M+K] <sup>+</sup>     | 815.51770 | 776.55674 | 2.684 |
| C43H72NO10P   | 1 | [M+Na] <sup>+</sup>    | 816.47940 | 793.48939 | 0.969 |
| C45H72NO10P   | 1 | [M-H] <sup>-</sup>     | 816.48540 | 817.48939 | 4.020 |
| C41H77O12S    | 1 | [M+Na] <sup>+</sup>    | 816.50250 | 793.51340 | 0.148 |
| C44H76NO9P    | 2 | [M+Na] <sup>+</sup>    | 816.51680 | 793.52577 | 2.212 |
| C41H80NO10P   | 2 | [M+K] <sup>+</sup>     | 816.51680 | 777.55199 | 2.035 |
| C42H73O13P    | 1 | [M+H] <sup>+</sup>     | 817.48860 | 816.47888 | 2.984 |
| C42H83O10P    | 1 | [M+K] <sup>+</sup>     | 817.53500 | 778.57239 | 0.659 |
| C50H83O4P     | 1 | [M+K] <sup>+</sup>     | 817.56220 | 778.60290 | 4.708 |
| C52H96O6      | 1 | [M+H] <sup>+</sup>     | 817.72700 | 816.72069 | 1.185 |
| C45H72NO10P   | 1 | [M+H] <sup>+</sup>     | 818.49260 | 817.48939 | 4.966 |
| C43H74NO10P   | 1 | [M+Na] <sup>+</sup>    | 818.49260 | 795.50504 | 2.027 |
| C44H84NO10P   | 2 | [M+H] <sup>+</sup>     | 818.59420 | 817.58329 | 4.441 |
| C41H64O15     | 1 | [M+Na] <sup>+</sup>    | 819.41310 | 796.42453 | 0.790 |
| C42H75O13P    | 2 | [M+H] <sup>+</sup>     | 819.49860 | 818.49453 | 3.918 |
| C47H72O10     | 2 | [M+Na] <sup>+</sup>    | 819.49860 | 796.51255 | 3.871 |
| C40H77O13P    | 1 | [M+Na] <sup>+</sup>    | 819.49860 | 796.51018 | 0.982 |
| C46H75O10P    | 4 | [M+H] <sup>+</sup>     | 819.51460 | 818.50979 | 3.009 |
| C43H79O12P    | 1 | [M+H] <sup>+</sup>     | 819.53690 | 818.53092 | 1.581 |
| C41H81O12P    | 1 | [M+Na] <sup>+</sup>    | 819.53690 | 796.54657 | 1.354 |
| C53H80O4      | 1 | [M+K] <sup>+</sup>     | 819.56840 | 780.60566 | 0.501 |
| C45H87O10P    | 1 | [M+H] <sup>+</sup>     | 819.61390 | 818.60369 | 3.580 |
| C46H91O9P     | 1 | [M+H] <sup>+</sup>     | 819.65120 | 818.64007 | 4.696 |
| C57H86O3      | 1 | [M+H] <sup>+</sup>     | 819.66120 | 818.65770 | 4.603 |
| C45H74NO10P   | 4 | [M+H] <sup>+</sup>     | 820.51100 | 819.50504 | 1.603 |
| C43H76NO10P   | 2 | [M+Na] <sup>+</sup>    | 820.51100 | 797.52069 | 1.330 |
| C44H80NO8P    | 1 | [M+K] <sup>+</sup>     | 820.52130 | 781.56216 | 4.885 |
| C45H84NO8P    | 1 | [M+Na] <sup>+</sup>    | 820.58470 | 797.59346 | 2.463 |
| C47H82NO8P    | 1 | [M+H] <sup>+</sup>     | 820.58470 | 819.57781 | 0.469 |
| C39H75O13P    | 3 | [M+K] <sup>+</sup>     | 821.45870 | 782.49453 | 1.237 |
| C44H79O9P     | 1 | [M+K] <sup>+</sup>     | 821.51200 | 782.54617 | 3.257 |
| C42H77O13P    | 2 | [M+H] <sup>+</sup>     | 821.51350 | 820.51018 | 4.822 |
| C47H74O10     | 2 | [M+Na] <sup>+</sup>    | 821.51350 | 798.52820 | 4.774 |
| C45H83O8P     | 1 | [M+K] <sup>+</sup>     | 821.54530 | 782.58256 | 0.498 |
| C45H87N2O6P   | 2 | [M+K] <sup>+</sup>     | 821.59390 | 782.63018 | 0.699 |
| C46H87O8P     | 1 | [M+Na] <sup>+</sup>    | 821.59970 | 798.61386 | 4.114 |
| C42H74NO10P   | 1 | [M+K] <sup>+</sup>     | 822.46490 | 783.50504 | 3.998 |
| C43H78NO9P    | 1 | [M+K] <sup>+</sup>     | 822.50200 | 783.54142 | 3.128 |
| C46H74NO8P    | 2 | [M+Na] <sup>+</sup>    | 822.50340 | 799.51521 | 1.251 |
| C43H78NO10P   | 2 | [M+Na] <sup>+</sup>    | 822.52890 | 799.53634 | 4.062 |
| C45H76NO10P   | 2 | [M+H] <sup>+</sup>     | 822.52890 | 821.52069 | 1.137 |
| C44H82NO8P    | 1 | [M+K] <sup>+</sup>     | 822.54410 | 783.57781 | 3.820 |
| C44H82NO9P    | 1 | [M+Na] <sup>+</sup>    | 822.55920 | 799.57272 | 3.336 |



|                |   |            |           |           |       |
|----------------|---|------------|-----------|-----------|-------|
| C45H86NO8P     | 1 | [M+Na]+    | 822.60080 | 799.60911 | 3.004 |
| C47H84NO8P     | 1 | [M+H]+     | 822.60080 | 821.59346 | 0.079 |
| C42H79O13P     | 1 | [M+H]+     | 823.53160 | 822.52583 | 1.835 |
| C45H89N2O6P    | 2 | [M+K]+     | 823.60630 | 784.64583 | 3.249 |
| C46H93N2O6P    | 1 | [M+Na]+    | 823.66260 | 800.67713 | 4.550 |
| C45H72NO8P     | 1 | [M+K]+     | 824.46530 | 785.49956 | 3.145 |
| C46H76NO8P     | 1 | [M+Na]+    | 824.52120 | 801.53086 | 1.360 |
| C43H80NO9P     | 1 | [M+K]+     | 824.52120 | 785.55707 | 1.185 |
| C48H76NO8P     | 1 | [M-H]-     | 824.52190 | 825.53086 | 2.047 |
| C46H78NO8P     | 1 | [M-2H+Na]- | 824.52190 | 803.54651 | 0.888 |
| C43H80NO10P    | 1 | [M+Na]+    | 824.54450 | 801.55199 | 3.991 |
| C45H78NO10P    | 1 | [M+H]+     | 824.54450 | 823.53634 | 1.073 |
| C45H87NO9      | 1 | [M+K]+     | 824.60150 | 785.63809 | 0.321 |
| C40H66O15      | 1 | [M+K]+     | 825.40460 | 786.44018 | 1.543 |
| C44H83O10P     | 1 | [M+Na]+    | 825.55850 | 802.57239 | 3.767 |
| C45H87O8P      | 1 | [M+K]+     | 825.57730 | 786.61386 | 0.352 |
| C42H79NO13     | 1 | [M-2H+Na]- | 826.53170 | 805.55515 | 2.293 |
| C43H82NO10P    | 1 | [M+Na]+    | 826.55990 | 803.56764 | 3.679 |
| C45H80NO10P    | 2 | [M+H]+     | 826.56150 | 825.55199 | 2.704 |
| C40H69O13P     | 1 | [M+K]+     | 827.41370 | 788.44758 | 3.585 |
| C47H81O8P      | 1 | [M+Na]+    | 827.55850 | 804.56691 | 2.864 |
| C44H85O9P      | 1 | [M+K]+     | 827.55850 | 788.59312 | 2.690 |
| C53H96O6       | 1 | [M-H]-     | 827.71040 | 828.72069 | 3.651 |
| C51H98O6       | 1 | [M-2H+Na]- | 827.71040 | 806.73634 | 0.727 |
| C46H80NO7P     | 1 | [M+K]+     | 828.53200 | 789.56724 | 1.940 |
| C42H79NO13     | 2 | [M+Na]+    | 828.54390 | 805.55515 | 0.562 |
| C44H71O10P     | 1 | [M+K]+     | 829.43960 | 790.47849 | 2.458 |
| C41H77O12P     | 1 | [M-2H+K]-  | 829.46590 | 792.51527 | 2.449 |
| C40H78O13P2    | 1 | [M+H]+     | 829.50260 | 828.49177 | 4.282 |
| C45H84NO10P    | 1 | [M+H]+     | 830.58870 | 829.58329 | 2.245 |
| C47H86NO7P     | 2 | [M+Na]+    | 830.59950 | 807.61419 | 4.712 |
| C46H88NO9P     | 2 | [M+H]+     | 830.62670 | 829.61967 | 0.301 |
| C53H100O6      | 1 | [M-H]-     | 831.74850 | 832.75199 | 4.542 |
| C23H38N7O17P3S | 1 | [M+Na]+    | 832.11450 | 809.12578 | 0.604 |
| C47H72NO8P     | 1 | [M+Na]+    | 832.49230 | 809.49956 | 4.231 |
| C44H76NO9P     | 1 | [M+K]+     | 832.49230 | 793.52577 | 4.057 |
| C44H76NO10P    | 1 | [M+Na]+    | 832.51170 | 809.52069 | 2.151 |
| C46H74NO10P    | 1 | [M+H]+     | 832.51170 | 831.50504 | 0.739 |
| C41H79O12P     | 2 | [M+K]+     | 833.49650 | 794.53092 | 2.917 |
| C44H81O12P     | 1 | [M+H]+     | 833.55740 | 832.54657 | 4.264 |
| C53H100O6      | 1 | [M+H]+     | 833.75610 | 832.75199 | 3.801 |
| C44H80NO9P     | 1 | [M-2H+K]-  | 834.50210 | 797.55707 | 4.282 |
| C47H76NO8P     | 1 | [M-2H+Na]- | 834.50210 | 813.53086 | 4.096 |
| C47H74NO8P     | 1 | [M+Na]+    | 834.50610 | 811.51521 | 2.002 |
| C44H78NO9P     | 1 | [M+K]+     | 834.50610 | 795.54142 | 1.830 |
| C46H76NO10P    | 1 | [M+H]+     | 834.52620 | 833.52069 | 2.115 |
| C46H86NO7P     | 1 | [M+K]+     | 834.57340 | 795.61419 | 4.725 |
| C46H92NO9P     | 1 | [M+H]+     | 834.65870 | 833.65097 | 0.539 |
| C48H96NO6P     | 1 | [M-2H+Na]- | 834.67240 | 813.69753 | 0.254 |
| C47H73O8P      | 1 | [M+K]+     | 835.46940 | 796.50431 | 2.323 |
| C47H93N2O6P    | 1 | [M+Na]+    | 835.66220 | 812.67713 | 4.964 |
| C57H86O4       | 1 | [M+H]+     | 835.66220 | 834.65261 | 2.767 |
| C52H92O6       | 1 | [M+Na]+    | 835.67900 | 812.68939 | 0.463 |

|                |   |                        |           |           |       |
|----------------|---|------------------------|-----------|-----------|-------|
| C47H95O9P      | 1 | [M+H] <sup>+</sup>     | 835.67900 | 834.67137 | 0.418 |
| C42H71O13P     | 1 | [M+Na] <sup>+</sup>    | 837.45290 | 814.46323 | 0.531 |
| C46H71O10P     | 2 | [M+Na] <sup>+</sup>    | 837.47030 | 814.47849 | 3.093 |
| C43H75O12P     | 1 | [M+Na] <sup>+</sup>    | 837.49130 | 814.49962 | 2.937 |
| C47H74O10      | 2 | [M+K] <sup>+</sup>     | 837.49130 | 798.52820 | 0.061 |
| C43H80NO10P    | 1 | [M-2H+K] <sup>-</sup>  | 838.50220 | 801.55199 | 1.922 |
| C44H84NO9P     | 1 | [M-2H+K] <sup>-</sup>  | 838.53440 | 801.58837 | 3.068 |
| C47H80NO8P     | 1 | [M-2H+Na] <sup>-</sup> | 838.53440 | 817.56216 | 2.884 |
| C44H82NO10P    | 1 | [M+Na] <sup>+</sup>    | 838.55310 | 815.56764 | 4.483 |
| C48H82NO6P     | 1 | [M+K] <sup>+</sup>     | 838.55310 | 799.58798 | 2.352 |
| C47H75N5O8     | 1 | [M+H] <sup>+</sup>     | 838.56740 | 837.56157 | 1.720 |
| C45H86NO9P     | 1 | [M+Na] <sup>+</sup>    | 838.59530 | 815.60402 | 2.452 |
| C46H90NO7P     | 1 | [M+K] <sup>+</sup>     | 838.61080 | 799.64549 | 2.572 |
| C40H64O16      | 2 | [M+K] <sup>+</sup>     | 839.38290 | 800.41944 | 0.368 |
| C46H73O10P     | 1 | [M+Na] <sup>+</sup>    | 839.48700 | 816.49414 | 4.336 |
| C47H76O11      | 1 | [M+Na] <sup>+</sup>    | 839.52520 | 816.53877 | 3.320 |
| C44H87O12P     | 2 | [M+H] <sup>+</sup>     | 839.60290 | 838.59352 | 2.506 |
| C46H89O9P      | 1 | [M+Na] <sup>+</sup>    | 839.61150 | 816.62442 | 2.555 |
| C44H68NO10P    | 1 | [M+K] <sup>+</sup>     | 840.42410 | 801.45809 | 3.407 |
| C45H75O12S     | 3 | [M+H] <sup>+</sup>     | 840.50680 | 839.49790 | 1.931 |
| C43H82NO10P    | 1 | [M-2H+K] <sup>-</sup>  | 840.51450 | 803.56764 | 2.068 |
| C46H78NO9P     | 1 | [M-2H+Na] <sup>-</sup> | 840.51450 | 819.54142 | 1.883 |
| C44H84NO10P    | 1 | [M+Na] <sup>+</sup>    | 840.57650 | 817.58329 | 4.748 |
| C46H82NO10P    | 1 | [M+H] <sup>+</sup>     | 840.57650 | 839.56764 | 1.886 |
| C47H96NO7P     | 1 | [M+Na] <sup>+</sup>    | 840.68530 | 817.69244 | 4.325 |
| C43H81O12P     | 3 | [M-2H+Na] <sup>-</sup> | 841.51790 | 820.54657 | 3.956 |
| C47H81O8P      | 2 | [M-2H+K] <sup>-</sup>  | 841.51790 | 804.56691 | 2.841 |
| C45H79O12P     | 2 | [M-H] <sup>-</sup>     | 841.51980 | 842.53092 | 4.574 |
| C44H83O10P     | 1 | [M+K] <sup>+</sup>     | 841.53300 | 802.57239 | 3.017 |
| C45H87O9P      | 1 | [M+K] <sup>+</sup>     | 841.57600 | 802.60877 | 4.843 |
| C43H84NO10P    | 3 | [M-2H+K] <sup>-</sup>  | 842.52840 | 805.58329 | 4.140 |
| C46H80NO9P     | 3 | [M-2H+Na] <sup>-</sup> | 842.52840 | 821.55707 | 3.956 |
| C48H92NO8P     | 1 | [M+H] <sup>+</sup>     | 842.65920 | 841.65606 | 4.907 |
| C47H83O8P      | 2 | [M-2H+K] <sup>-</sup>  | 843.53170 | 806.58256 | 0.641 |
| C45H81O12P     | 2 | [M-H] <sup>-</sup>     | 843.53710 | 844.54657 | 2.607 |
| C43H83O12P     | 2 | [M-2H+Na] <sup>-</sup> | 843.53710 | 822.56222 | 0.262 |
| C45H76NO10P    | 1 | [M+Na] <sup>+</sup>    | 844.51310 | 821.52069 | 3.779 |
| C46H80NO8P     | 1 | [M+K] <sup>+</sup>     | 844.52410 | 805.56216 | 1.430 |
| C46H82NO9P     | 1 | [M-2H+Na] <sup>-</sup> | 844.54330 | 823.57272 | 4.835 |
| C44H77O13P     | 1 | [M+H] <sup>+</sup>     | 845.51990 | 844.51018 | 2.885 |
| C47H83O8P      | 1 | [M+K] <sup>+</sup>     | 845.54410 | 806.58256 | 1.903 |
| C45H83O12P     | 2 | [M-H] <sup>-</sup>     | 845.55850 | 846.56222 | 4.200 |
| C45H91O9P      | 1 | [M+K] <sup>+</sup>     | 845.60130 | 806.64007 | 2.275 |
| C54H100O6      | 1 | [M+H] <sup>+</sup>     | 845.75770 | 844.75199 | 1.855 |
| C23H38N7O17P3S | 1 | [M-2H+K] <sup>-</sup>  | 846.07860 | 809.12578 | 4.985 |
| C44H74NO10P    | 2 | [M+K] <sup>+</sup>     | 846.46730 | 807.50504 | 1.049 |
| C45H78NO10P    | 3 | [M+Na] <sup>+</sup>    | 846.52670 | 823.53634 | 1.348 |
| C42H81NO12S    | 1 | [M+Na] <sup>+</sup>    | 846.54050 | 823.54795 | 3.929 |
| C46H82NO8P     | 1 | [M+K] <sup>+</sup>     | 846.54050 | 807.57781 | 0.541 |
| C46H82NO9P     | 1 | [M+Na] <sup>+</sup>    | 846.56400 | 823.57272 | 2.429 |
| C49H84NO8P     | 1 | [M+H] <sup>+</sup>     | 846.59890 | 845.59346 | 2.167 |
| C47H86NO8P     | 1 | [M+Na] <sup>+</sup>    | 846.59890 | 823.60911 | 0.674 |
| C46H88NO10P    | 2 | [M+H] <sup>+</sup>     | 846.61780 | 845.61459 | 4.801 |

|             |   |            |           |           |       |
|-------------|---|------------|-----------|-----------|-------|
| C48H90NO7P  | 1 | [M+Na]+    | 846.63730 | 823.64549 | 3.054 |
| C50H88NO7P  | 1 | [M+H]+     | 846.63730 | 845.62984 | 0.213 |
| C41H77O13P  | 1 | [M+K]+     | 847.47560 | 808.51018 | 2.674 |
| C45H77O10P  | 1 | [M+K]+     | 847.49250 | 808.52544 | 4.615 |
| C46H81O10P  | 2 | [M+Na]+    | 847.54210 | 824.55674 | 4.554 |
| C48H79O10P  | 1 | [M+H]+     | 847.54810 | 846.54109 | 0.314 |
| C44H76NO10P | 2 | [M+K]+     | 848.48290 | 809.52069 | 1.106 |
| C47H78NO10P | 1 | [M+H]+     | 848.54350 | 847.53634 | 0.136 |
| C47H88NO8P  | 1 | [M+Na]+    | 848.61190 | 825.62476 | 2.450 |
| C47H94NO9P  | 1 | [M+H]+     | 848.67440 | 847.66662 | 0.589 |
| C43H71O13P  | 1 | [M+Na]+    | 849.45410 | 826.46323 | 1.937 |
| C41H79O13P  | 2 | [M+K]+     | 849.48650 | 810.52583 | 2.924 |
| C42H83O12P  | 1 | [M+K]+     | 849.52640 | 810.56222 | 1.214 |
| C47H87O8P   | 1 | [M+K]+     | 849.57450 | 810.61386 | 2.953 |
| C48H95N2O6P | 1 | [M+Na]+    | 849.68020 | 826.69278 | 2.116 |
| C46H70NO10P | 1 | [M+Na]+    | 850.46720 | 827.47374 | 4.988 |
| C47H74NO8P  | 1 | [M+K]+     | 850.48160 | 811.51521 | 3.812 |
| C44H78NO10P | 1 | [M+K]+     | 850.50150 | 811.53634 | 2.366 |
| C45H82NO10P | 1 | [M+Na]+    | 850.55970 | 827.56764 | 3.340 |
| C47H80NO10P | 1 | [M+H]+     | 850.55970 | 849.55199 | 0.511 |
| C46H88NO8P  | 1 | [M-2H+K]-  | 850.57740 | 813.62476 | 4.752 |
| C47H90NO7P  | 1 | [M+K]+     | 850.60550 | 811.64549 | 3.695 |
| C40H78O13P2 | 2 | [M+Na]+    | 851.48360 | 828.49177 | 3.063 |
| C45H81O10P  | 2 | [M+K]+     | 851.51620 | 812.55674 | 4.332 |
| C46H85O10P  | 3 | [M+Na]+    | 851.57900 | 828.58804 | 2.043 |
| C48H83O10P  | 3 | [M+H]+     | 851.57900 | 850.57239 | 0.782 |
| C47H76NO8P  | 1 | [M+K]+     | 852.49030 | 813.53086 | 4.350 |
| C50H80NO8P  | 2 | [M-H]-     | 852.55110 | 853.56216 | 4.443 |
| C45H86NO9P  | 2 | [M-2H+K]-  | 852.55110 | 815.60402 | 1.786 |
| C48H82NO8P  | 2 | [M-2H+Na]- | 852.55110 | 831.57781 | 1.605 |
| C47H82NO10P | 1 | [M+H]+     | 852.57260 | 851.56764 | 2.715 |
| C45H84NO10P | 1 | [M+Na]+    | 852.57260 | 829.58329 | 0.107 |
| C48H86NO9P  | 1 | [M+H]+     | 852.61350 | 851.60402 | 2.580 |
| C46H71O10P  | 2 | [M+K]+     | 853.43800 | 814.47849 | 4.264 |
| C45H73O13P  | 1 | [M+H]+     | 853.48800 | 852.47888 | 2.155 |
| C45H75O13P  | 1 | [M-H]-     | 853.49140 | 854.49453 | 4.846 |
| C47H76O11   | 1 | [M-2H+K]-  | 853.49140 | 816.53877 | 4.726 |
| C46H87O9P   | 1 | [M+K]+     | 853.56810 | 814.60877 | 4.480 |
| C47H95N2O6P | 1 | [M+K]+     | 853.65590 | 814.69278 | 0.032 |
| C53H98O6    | 1 | [M+Na]+    | 853.72150 | 830.73634 | 4.759 |
| C48H72NO10P | 1 | [M+H]+     | 854.49340 | 853.48939 | 3.821 |
| C46H74NO10P | 1 | [M+Na]+    | 854.49340 | 831.50504 | 1.005 |
| C44H84NO10P | 1 | [M-2H+K]-  | 854.52870 | 817.58329 | 3.731 |
| C48H82NO7P  | 1 | [M+K]+     | 854.54190 | 815.58289 | 4.848 |
| C46H90NO8P  | 1 | [M+K]+     | 854.59960 | 815.64041 | 4.631 |
| C46H90NO9P  | 1 | [M+Na]+    | 854.62750 | 831.63532 | 3.459 |
| C48H88NO9P  | 1 | [M+H]+     | 854.62750 | 853.61967 | 0.644 |
| C43H77O12P  | 2 | [M+K]+     | 855.47820 | 816.51527 | 0.256 |
| C47H79O10P  | 1 | [M-2H+Na]- | 855.51930 | 834.54109 | 4.151 |
| C44H83O12P  | 1 | [M-2H+Na]- | 855.53730 | 834.56222 | 0.492 |
| C58H88O3    | 1 | [M+Na]+    | 855.65970 | 832.67335 | 3.352 |
| C55H98O6    | 1 | [M+H]+     | 855.74110 | 854.73634 | 2.944 |
| C45H72NO10P | 1 | [M+K]+     | 856.45510 | 817.48939 | 2.991 |

|                |   |            |           |           |       |
|----------------|---|------------|-----------|-----------|-------|
| C47H82NO8P     | 1 | [M-2H+K]-  | 856.52480 | 819.57781 | 1.877 |
| C44H86NO10P    | 1 | [M-2H+K]-  | 856.54830 | 819.59894 | 0.890 |
| C44H85NO11S    | 1 | [M-2H+Na]- | 856.56100 | 835.58434 | 2.337 |
| C48H86NO7P     | 1 | [M-2H+K]-  | 856.56100 | 819.61419 | 2.093 |
| C48H84NO7P     | 1 | [M+K]+     | 856.56540 | 817.59854 | 4.328 |
| C44H83NO13     | 1 | [M+Na]+    | 856.57430 | 833.58645 | 1.595 |
| C44H82O13      | 4 | [M+K]+     | 857.54230 | 818.57555 | 4.202 |
| C44H85O12P     | 3 | [M-2H+Na]- | 857.54980 | 836.57787 | 3.182 |
| C45H87O10P     | 1 | [M+K]+     | 857.56380 | 818.60369 | 3.544 |
| C48H83O9P      | 1 | [M+Na]+    | 857.56380 | 834.57747 | 3.376 |
| C46H78NO9P     | 1 | [M+K]+     | 858.50170 | 819.54142 | 3.347 |
| C49H74NO8P     | 1 | [M+Na]+    | 858.50170 | 835.51521 | 3.179 |
| C44H86NO10P    | 1 | [M+K]+     | 858.56450 | 819.59894 | 2.809 |
| C48H92NO9P     | 2 | [M+H]+     | 858.65810 | 857.65097 | 0.175 |
| C47H81O10P     | 2 | [M+Na]+    | 859.54170 | 836.55674 | 4.956 |
| C44H85O12P     | 1 | [M+Na]+    | 859.56330 | 836.57787 | 4.409 |
| C52H100O6      | 1 | [M+K]+     | 859.71570 | 820.75199 | 0.649 |
| C46H80NO10P    | 2 | [M+Na]+    | 860.54360 | 837.55199 | 2.778 |
| C48H78NO10P    | 3 | [M+H]+     | 860.54360 | 859.53634 | 0.017 |
| C47H75N5O8     | 1 | [M+Na]+    | 860.54730 | 837.56157 | 4.051 |
| C43H83O12P     | 1 | [M+K]+     | 861.52760 | 822.56222 | 2.590 |
| C46H85O12P     | 1 | [M+H]+     | 861.58890 | 860.57787 | 4.357 |
| C45H75O12S     | 1 | [M+Na]+    | 862.48750 | 839.49790 | 0.439 |
| C45H80NO10P    | 1 | [M-2H+K]-  | 862.49810 | 825.55199 | 2.885 |
| C46H82NO9P     | 1 | [M+K]+     | 862.53420 | 823.57272 | 1.940 |
| C49H78NO8P     | 1 | [M+Na]+    | 862.53420 | 839.54651 | 1.773 |
| C48H90NO7P     | 1 | [M+K]+     | 862.61250 | 823.64549 | 4.471 |
| C50H97NO8      | 1 | [M+Na]+    | 862.71480 | 839.72142 | 4.821 |
| C48H73O10P     | 1 | [M+Na]+    | 863.47990 | 840.49414 | 4.007 |
| C27H44N7O17P3S | 1 | [M+H]+     | 864.18220 | 863.17273 | 2.535 |
| C45H82NO10P    | 2 | [M-2H+K]-  | 864.51380 | 827.56764 | 2.820 |
| C45H80NO10P    | 1 | [M+K]+     | 864.51890 | 825.55199 | 4.352 |
| C46H90NO11P    | 1 | [M+H]+     | 864.63290 | 863.62515 | 0.544 |
| C43H71O13P     | 1 | [M+K]+     | 865.42470 | 826.46323 | 1.946 |
| C44H75O13P     | 1 | [M+Na]+    | 865.48420 | 842.49453 | 0.514 |
| C50H75O10P     | 1 | [M-H]-     | 865.50030 | 866.50979 | 2.564 |
| C48H77O10P     | 1 | [M-2H+Na]- | 865.50030 | 844.52544 | 0.232 |
| C47H79O12P     | 1 | [M-H]-     | 865.52060 | 866.53092 | 3.523 |
| C48H91O9P      | 1 | [M+Na]+    | 865.62650 | 842.64007 | 3.229 |
| C48H80NO8P     | 1 | [M-2H+K]-  | 866.51260 | 829.56216 | 2.126 |
| C48H84NO10P    | 1 | [M+H]+     | 866.59280 | 865.58329 | 2.579 |
| C47H90NO8P     | 1 | [M+K]+     | 866.60370 | 827.64041 | 0.164 |
| C50H92NO8P     | 1 | [M+H]+     | 866.66700 | 865.65606 | 4.229 |
| C44H77O13P     | 1 | [M+Na]+    | 867.49710 | 844.51018 | 2.657 |
| C50H75O10P     | 3 | [M+H]+     | 867.52100 | 866.50979 | 4.535 |
| C47H81O12P     | 1 | [M-H]-     | 867.53730 | 868.54657 | 2.304 |
| C46H91O12P     | 1 | [M+H]+     | 867.63030 | 866.62482 | 2.070 |
| C48H80NO8P     | 2 | [M+K]+     | 868.52310 | 829.56216 | 2.542 |
| C45H86NO10P    | 1 | [M-2H+K]-  | 868.54570 | 831.59894 | 2.116 |
| C48H82NO9P     | 1 | [M-2H+Na]- | 868.54570 | 847.57272 | 1.938 |
| C47H92NO8P     | 1 | [M+K]+     | 868.61730 | 829.65606 | 2.197 |
| C50H88NO7P     | 1 | [M+Na]+    | 868.61730 | 845.62984 | 2.031 |
| C48H96NO8P     | 1 | [M+Na]+    | 868.67240 | 845.68736 | 4.811 |

|             |   |                        |           |           |       |
|-------------|---|------------------------|-----------|-----------|-------|
| C46H77O13P  | 1 | [M+H] <sup>+</sup>     | 869.51600 | 868.51018 | 1.680 |
| C44H79O13P  | 1 | [M+Na] <sup>+</sup>    | 869.51600 | 846.52583 | 1.087 |
| C45H83O12P  | 1 | [M+Na] <sup>+</sup>    | 869.54790 | 846.56222 | 4.071 |
| C47H83O12P  | 4 | [M-H] <sup>-</sup>     | 869.55070 | 870.56222 | 4.886 |
| C45H85O12P  | 2 | [M-2H+Na] <sup>-</sup> | 869.55070 | 848.57787 | 2.103 |
| C46H87O10P  | 1 | [M+K] <sup>+</sup>     | 869.56890 | 830.60369 | 2.370 |
| C47H78NO10P | 1 | [M+Na] <sup>+</sup>    | 870.52260 | 847.53634 | 3.399 |
| C45H88NO10P | 2 | [M-2H+K] <sup>-</sup>  | 870.56200 | 833.61459 | 1.365 |
| C48H84NO9P  | 2 | [M-2H+Na] <sup>-</sup> | 870.56200 | 849.58837 | 1.187 |
| C48H88NO10P | 1 | [M+H] <sup>+</sup>     | 870.61880 | 869.61459 | 3.520 |
| C46H90NO10P | 1 | [M+Na] <sup>+</sup>    | 870.61880 | 847.63024 | 0.757 |
| C44H81O13P  | 1 | [M+Na] <sup>+</sup>    | 871.53330 | 848.54148 | 2.978 |
| C46H79O13P  | 1 | [M+H] <sup>+</sup>     | 871.53330 | 870.52583 | 0.217 |
| C47H85O12P  | 1 | [M-H] <sup>-</sup>     | 871.56830 | 872.57787 | 2.638 |
| C45H87O12P  | 1 | [M-2H+Na] <sup>-</sup> | 871.56830 | 850.59352 | 0.139 |
| C58H88O4    | 2 | [M+Na] <sup>+</sup>    | 871.65670 | 848.66826 | 0.898 |
| C54H104O6   | 1 | [M+Na] <sup>+</sup>    | 871.77650 | 848.78329 | 4.573 |
| C56H102O6   | 1 | [M+H] <sup>+</sup>     | 871.77650 | 870.76764 | 1.814 |
| C46H76NO10P | 1 | [M+K] <sup>+</sup>     | 872.48730 | 833.52069 | 3.968 |
| C50H78NO8P  | 1 | [M-2H+Na] <sup>-</sup> | 872.52030 | 851.54651 | 0.995 |
| C48H90NO10P | 2 | [M+H] <sup>+</sup>     | 872.64180 | 871.63024 | 4.910 |
| C42H64O19   | 1 | [M+H] <sup>+</sup>     | 873.41030 | 872.40419 | 1.332 |
| C47H79O10P  | 1 | [M+K] <sup>+</sup>     | 873.50600 | 834.54109 | 2.016 |
| C44H83O12P  | 1 | [M+K] <sup>+</sup>     | 873.52230 | 834.56222 | 3.513 |
| C44H83O13P  | 1 | [M+Na] <sup>+</sup>    | 873.54220 | 850.55713 | 4.756 |
| C55H94O6    | 1 | [M+Na] <sup>+</sup>    | 873.69650 | 850.70504 | 2.560 |
| C57H92O6    | 1 | [M+H] <sup>+</sup>     | 873.69650 | 872.68939 | 0.193 |
| C46H78NO10P | 3 | [M+K] <sup>+</sup>     | 874.49750 | 835.53634 | 2.273 |
| C44H85NO11S | 1 | [M+K] <sup>+</sup>     | 874.54770 | 835.58434 | 0.242 |
| C48H86NO8P  | 1 | [M+K] <sup>+</sup>     | 874.57030 | 835.60911 | 2.239 |
| C44H85NO12S | 1 | [M+Na] <sup>+</sup>    | 874.57030 | 851.57925 | 2.088 |
| C45H73O13P  | 1 | [M+Na] <sup>+</sup>    | 875.46820 | 852.47888 | 0.109 |
| C43H81O13P  | 1 | [M+K] <sup>+</sup>     | 875.50770 | 836.54148 | 3.502 |
| C45H89O12P  | 1 | [M+Na] <sup>+</sup>    | 875.60020 | 852.60917 | 2.067 |
| C47H87O12P  | 1 | [M+H] <sup>+</sup>     | 875.60020 | 874.59352 | 0.681 |
| C46H80NO10P | 1 | [M+K] <sup>+</sup>     | 876.51500 | 837.55199 | 0.157 |
| C47H75N5O8  | 1 | [M+K] <sup>+</sup>     | 876.52420 | 837.56157 | 0.588 |
| C48H88NO8P  | 1 | [M+K] <sup>+</sup>     | 876.58720 | 837.62476 | 0.808 |
| C45H75O13P  | 1 | [M+Na] <sup>+</sup>    | 877.48130 | 854.49453 | 2.798 |
| C49H78NO8P  | 1 | [M+K] <sup>+</sup>     | 878.51350 | 839.54651 | 4.373 |
| C46H84NO10P | 1 | [M-2H+K] <sup>-</sup>  | 878.52920 | 841.58329 | 3.060 |
| C46H82NO10P | 1 | [M+K] <sup>+</sup>     | 878.53200 | 839.56764 | 1.380 |
| C48H90NO8P  | 1 | [M+K] <sup>+</sup>     | 878.60670 | 839.64041 | 3.576 |
| C49H94NO8P  | 1 | [M+Na] <sup>+</sup>    | 878.66130 | 855.67171 | 0.422 |
| C48H73O10P  | 1 | [M+K] <sup>+</sup>     | 879.45640 | 840.49414 | 1.011 |
| C45H77O13P  | 2 | [M+Na] <sup>+</sup>    | 879.50350 | 856.51018 | 4.656 |
| C47H75O13P  | 4 | [M+H] <sup>+</sup>     | 879.50350 | 878.49453 | 1.920 |
| C55H100O6   | 1 | [M+Na] <sup>+</sup>    | 879.74400 | 856.75199 | 3.168 |
| C57H98O6    | 1 | [M+H] <sup>+</sup>     | 879.74400 | 878.73634 | 0.433 |
| C50H74NO10P | 2 | [M+H] <sup>+</sup>     | 880.50820 | 879.50504 | 4.673 |
| C48H76NO10P | 3 | [M+Na] <sup>+</sup>    | 880.50820 | 857.52069 | 1.941 |
| C46H84NO10P | 1 | [M+K] <sup>+</sup>     | 880.54980 | 841.58329 | 3.818 |
| C51H94NO8P  | 1 | [M+H] <sup>+</sup>     | 880.67590 | 879.67171 | 3.503 |

|                |   |                        |           |           |       |
|----------------|---|------------------------|-----------|-----------|-------|
| C49H96NO8P     | 1 | [M+Na] <sup>+</sup>    | 880.67590 | 857.68736 | 0.771 |
| C44H75O13P     | 2 | [M+K] <sup>+</sup>     | 881.45540 | 842.49453 | 2.591 |
| C48H75O10P     | 3 | [M+K] <sup>+</sup>     | 881.47230 | 842.50979 | 0.725 |
| C45H81O13P     | 3 | [M-2H+Na] <sup>-</sup> | 881.51180 | 860.54148 | 4.928 |
| C47H79O13P     | 1 | [M-H] <sup>-</sup>     | 881.51990 | 882.52583 | 1.516 |
| C47H77O13P     | 2 | [M+H] <sup>+</sup>     | 881.52080 | 880.51018 | 3.788 |
| C46H89O13P     | 1 | [M+H] <sup>+</sup>     | 881.60720 | 880.60408 | 4.720 |
| C48H91O9P      | 2 | [M+K] <sup>+</sup>     | 881.60720 | 842.64007 | 4.510 |
| C48H91O10P     | 1 | [M+Na] <sup>+</sup>    | 881.62000 | 858.63499 | 4.775 |
| C48H93O10P     | 2 | [M-2H+Na] <sup>-</sup> | 881.62140 | 860.65064 | 4.423 |
| C49H82NO8P     | 1 | [M+K] <sup>+</sup>     | 882.54140 | 843.57781 | 0.501 |
| C49H84NO8P     | 1 | [M-2H+K] <sup>-</sup>  | 882.54290 | 845.59346 | 0.954 |
| C47H90NO10P    | 1 | [M+Na] <sup>+</sup>    | 882.62370 | 859.63024 | 4.805 |
| C49H88NO10P    | 1 | [M+H] <sup>+</sup>     | 882.62370 | 881.61459 | 2.079 |
| C48H94NO8P     | 1 | [M+K] <sup>+</sup>     | 882.63570 | 843.67171 | 0.954 |
| C49H98NO7P     | 1 | [M+K] <sup>+</sup>     | 882.66770 | 843.70809 | 4.014 |
| C48H77O10P     | 4 | [M+K] <sup>+</sup>     | 883.48580 | 844.52544 | 3.157 |
| C45H81O12P     | 1 | [M+K] <sup>+</sup>     | 883.51130 | 844.54657 | 1.789 |
| C49H86NO8P     | 2 | [M-2H+K] <sup>-</sup>  | 884.55330 | 847.60911 | 4.983 |
| C46H87NO13     | 2 | [M+Na] <sup>+</sup>    | 884.60630 | 861.61775 | 0.753 |
| C47H92NO10P    | 1 | [M+Na] <sup>+</sup>    | 884.63780 | 861.64589 | 3.042 |
| C48H96NO9P     | 1 | [M+Na] <sup>+</sup>    | 884.66820 | 861.68227 | 3.723 |
| C46H87O12P     | 2 | [M+Na] <sup>+</sup>    | 885.58200 | 862.59352 | 0.836 |
| C59H90O4       | 2 | [M+Na] <sup>+</sup>    | 885.67340 | 862.68391 | 0.301 |
| C47H78NO10P    | 1 | [M+K] <sup>+</sup>     | 886.50270 | 847.53634 | 3.623 |
| C49H86NO8P     | 1 | [M+K] <sup>+</sup>     | 886.57600 | 847.60911 | 4.221 |
| C46H89NO13     | 1 | [M+Na] <sup>+</sup>    | 886.61940 | 863.63340 | 3.627 |
| C49H92NO10P    | 2 | [M+H] <sup>+</sup>     | 886.65630 | 885.64589 | 3.536 |
| C45H87O13P     | 1 | [M-2H+Na] <sup>-</sup> | 887.56550 | 866.58843 | 2.711 |
| C47H85O13P     | 3 | [M-H] <sup>-</sup>     | 887.56550 | 888.57278 | 0.016 |
| C46H95O11PS    | 1 | [M+H] <sup>+</sup>     | 887.64370 | 886.63328 | 3.544 |
| C49H94NO10P    | 1 | [M+H] <sup>+</sup>     | 888.67270 | 887.66154 | 4.372 |
| C46H75O13P     | 4 | [M+Na] <sup>+</sup>    | 889.48600 | 866.49453 | 2.524 |
| C47H79O12P     | 1 | [M+Na] <sup>+</sup>    | 889.51660 | 866.53092 | 3.980 |
| C45H87O12P     | 3 | [M+K] <sup>+</sup>     | 889.55270 | 850.59352 | 4.462 |
| C56H98O6       | 1 | [M+Na] <sup>+</sup>    | 889.72350 | 866.73634 | 2.319 |
| C47H84NO10P    | 1 | [M-2H+K] <sup>-</sup>  | 890.53260 | 853.58329 | 0.800 |
| C48H91NO11S    | 1 | [M+H] <sup>+</sup>     | 890.63750 | 889.63129 | 1.196 |
| C50H94NO7P     | 2 | [M+K] <sup>+</sup>     | 890.64300 | 851.67679 | 3.432 |
| C46H77O13P     | 1 | [M+Na] <sup>+</sup>    | 891.50240 | 868.51018 | 3.360 |
| C47H81O12P     | 1 | [M+Na] <sup>+</sup>    | 891.53750 | 868.54657 | 1.918 |
| C44H85O13P     | 1 | [M+K] <sup>+</sup>     | 891.53750 | 852.57278 | 1.757 |
| C47H87O13P     | 1 | [M+H] <sup>+</sup>     | 891.59600 | 890.58843 | 0.324 |
| C49H89O10P     | 1 | [M+Na] <sup>+</sup>    | 891.61060 | 868.61934 | 2.288 |
| C50H99O10P     | 1 | [M+H] <sup>+</sup>     | 891.70590 | 890.69759 | 1.160 |
| C58H98O6       | 1 | [M+H] <sup>+</sup>     | 891.74090 | 890.73634 | 3.049 |
| C56H100O6      | 1 | [M+Na] <sup>+</sup>    | 891.74090 | 868.75199 | 0.351 |
| C29H48N7O17P3S | 2 | [M+H] <sup>+</sup>     | 892.21130 | 891.20403 | 0.010 |
| C47H51NO14     | 1 | [M+K] <sup>+</sup>     | 892.29420 | 853.33096 | 0.101 |
| C47H86NO10P    | 2 | [M-2H+K] <sup>-</sup>  | 892.54820 | 855.59894 | 0.742 |
| C47H84NO10P    | 1 | [M+K] <sup>+</sup>     | 892.54980 | 853.58329 | 3.767 |
| C50H96NO8P     | 1 | [M+Na] <sup>+</sup>    | 892.67930 | 869.68736 | 3.048 |
| C52H94NO8P     | 1 | [M+H] <sup>+</sup>     | 892.67930 | 891.67171 | 0.353 |

|                |   |            |           |           |       |
|----------------|---|------------|-----------|-----------|-------|
| C45H75O13P     | 2 | [M+K]+     | 893.45640 | 854.49453 | 1.437 |
| C43H72O19      | 1 | [M+H]+     | 893.46970 | 892.46679 | 4.883 |
| C46H79O13P     | 2 | [M+Na]+    | 893.51920 | 870.52583 | 4.639 |
| C48H77O13P     | 3 | [M+H]+     | 893.52030 | 892.51018 | 3.177 |
| C52H76O12      | 3 | [M+H]+     | 893.53830 | 892.53368 | 2.975 |
| C48H87O10P     | 1 | [M+K]+     | 893.56520 | 854.60369 | 1.834 |
| C48H93O12P     | 1 | [M+H]+     | 893.65020 | 892.64047 | 2.746 |
| C50H82NO8P     | 2 | [M+K]+     | 894.53770 | 855.57781 | 3.642 |
| C47H88NO10P    | 1 | [M-2H+K]-  | 894.56070 | 857.61459 | 2.781 |
| C49H94NO8P     | 1 | [M+K]+     | 894.63750 | 855.67171 | 2.953 |
| C50H84O7P2     | 1 | [M-2H+K]-  | 895.51950 | 858.56923 | 1.863 |
| C46H81O13P     | 1 | [M+Na]+    | 895.52760 | 872.54148 | 3.467 |
| C50H83O10P     | 1 | [M-2H+Na]- | 895.54340 | 874.57239 | 4.075 |
| C50H84NO8P     | 1 | [M+K]+     | 896.55720 | 857.59346 | 0.660 |
| C49H98NO8P     | 1 | [M-2H+K]-  | 896.65190 | 859.70301 | 0.326 |
| C50H100NO8P    | 1 | [M+Na]+    | 896.71180 | 873.71866 | 4.373 |
| C52H98NO8P     | 1 | [M+H]+     | 896.71180 | 895.70301 | 1.690 |
| C47H73O13P     | 2 | [M-2H+Na]- | 897.45220 | 876.47888 | 1.498 |
| C50H84O7P2     | 1 | [M+K]+     | 897.53470 | 858.56923 | 2.583 |
| C56H106O6      | 1 | [M+Na]+    | 897.79120 | 874.79894 | 3.383 |
| C58H104O6      | 1 | [M+H]+     | 897.79120 | 896.78329 | 0.703 |
| C48H78NO10P    | 1 | [M+K]+     | 898.49630 | 859.53634 | 3.548 |
| C47H90NO10P    | 1 | [M+K]+     | 898.59350 | 859.63024 | 0.125 |
| C52H100NO8P    | 1 | [M+H]+     | 898.72260 | 897.71866 | 3.711 |
| C47H73O13P     | 1 | [M+Na]+    | 899.47230 | 876.47888 | 4.664 |
| C46H87O12P     | 2 | [M-2H+K]-  | 899.53900 | 862.59352 | 3.467 |
| C46H85O12P     | 1 | [M+K]+     | 899.54100 | 860.57787 | 0.021 |
| C48H95O10P     | 1 | [M-2H+K]-  | 899.61760 | 862.66629 | 3.014 |
| C48H93O11P     | 1 | [M+Na]+    | 899.63610 | 876.64555 | 1.473 |
| C48H80NO10P    | 2 | [M+K]+     | 900.51930 | 861.55199 | 4.622 |
| C48H96NO9P     | 1 | [M+K]+     | 900.64850 | 861.68227 | 3.416 |
| C46H76O17      | 1 | [M+H]+     | 901.51350 | 900.50826 | 2.255 |
| C45H83O13P     | 1 | [M+K]+     | 901.52380 | 862.55713 | 3.900 |
| C46H89O12P     | 2 | [M-2H+K]-  | 901.55850 | 864.60917 | 0.811 |
| C50H87O10P     | 1 | [M+Na]+    | 901.59450 | 878.60369 | 1.764 |
| C47H98O11P2    | 1 | [M+H]+     | 901.66150 | 900.65844 | 4.679 |
| C27H44N7O17P3S | 1 | [M+K]+     | 902.13600 | 863.17273 | 0.131 |
| C48H82NO10P    | 2 | [M+K]+     | 902.52960 | 863.56764 | 1.316 |
| C52H84NO8P     | 1 | [M-2H+Na]- | 902.56570 | 881.59346 | 2.679 |
| C46H90NO11P    | 1 | [M+K]+     | 902.59080 | 863.62515 | 2.766 |
| C49H75O13P     | 1 | [M+H]+     | 903.50240 | 902.49453 | 0.652 |
| C45H85O13P     | 1 | [M+K]+     | 903.53920 | 864.57278 | 3.615 |
| C46H89O12P     | 1 | [M+K]+     | 903.56960 | 864.60917 | 3.009 |
| C48H89O13P     | 1 | [M-H]-     | 903.59530 | 904.60408 | 1.676 |
| C47H93O12P     | 1 | [M+Na]+    | 903.62600 | 880.64047 | 4.084 |
| C48H84NO10P    | 2 | [M+K]+     | 904.54370 | 865.58329 | 3.027 |
| C50H75O10P     | 1 | [M+K]+     | 905.46870 | 866.50979 | 4.682 |
| C46H76O16      | 1 | [M-2H+Na]- | 905.48950 | 884.51334 | 1.655 |
| C47H79O13P     | 2 | [M+Na]+    | 905.51080 | 882.52583 | 4.699 |
| C49H77O13P     | 3 | [M+H]+     | 905.52000 | 904.51018 | 2.804 |
| C49H93O12P     | 1 | [M+H]+     | 905.64460 | 904.64047 | 3.474 |
| C50H78NO10P    | 3 | [M+Na]+    | 906.52430 | 883.53634 | 1.389 |
| C48H86NO10P    | 1 | [M+K]+     | 906.56110 | 867.59894 | 1.090 |

|                |   |                        |           |           |       |
|----------------|---|------------------------|-----------|-----------|-------|
| C48H91NO12S    | 1 | [M+H] <sup>+</sup>     | 906.63800 | 905.62620 | 4.985 |
| C50H94NO8P     | 1 | [M+K] <sup>+</sup>     | 906.63800 | 867.67171 | 3.466 |
| C51H98NO8P     | 1 | [M+Na] <sup>+</sup>    | 906.69160 | 883.70301 | 0.694 |
| C47H81O12P     | 1 | [M+K] <sup>+</sup>     | 907.50530 | 868.54657 | 4.869 |
| C46H76O16      | 1 | [M+Na] <sup>+</sup>    | 907.50530 | 884.51334 | 3.017 |
| C47H81O13P     | 2 | [M+Na] <sup>+</sup>    | 907.53450 | 884.54148 | 4.182 |
| C49H79O13P     | 4 | [M+H] <sup>+</sup>     | 907.53450 | 906.52583 | 1.531 |
| C56H100O6      | 1 | [M+K] <sup>+</sup>     | 907.71230 | 868.75199 | 3.131 |
| C50H79O10P     | 3 | [M+K] <sup>+</sup>     | 909.50490 | 870.54109 | 0.727 |
| C47H83O13P     | 2 | [M+Na] <sup>+</sup>    | 909.54370 | 886.55713 | 2.919 |
| C49H81O13P     | 1 | [M+H] <sup>+</sup>     | 909.54450 | 908.54148 | 4.685 |
| C48H93O13P     | 1 | [M+H] <sup>+</sup>     | 909.64680 | 908.63538 | 4.550 |
| C50H95O10P     | 3 | [M+Na] <sup>+</sup>    | 909.65510 | 886.66629 | 0.451 |
| C29H50N7O18P3S | 1 | [M+H] <sup>+</sup>     | 910.22440 | 909.21460 | 2.775 |
| C50H84NO10P    | 2 | [M-2H+Na] <sup>-</sup> | 910.55370 | 889.58329 | 4.665 |
| C48H90NO10P    | 2 | [M+K] <sup>+</sup>     | 910.59530 | 871.63024 | 2.100 |
| C49H94NO10P    | 1 | [M+Na] <sup>+</sup>    | 910.65500 | 887.66154 | 4.657 |
| C42H64O19      | 1 | [M+K] <sup>+</sup>     | 911.36850 | 872.40419 | 1.277 |
| C46H81O13P     | 1 | [M+K] <sup>+</sup>     | 911.50570 | 872.54148 | 1.169 |
| C48H91NO11S    | 2 | [M+Na] <sup>+</sup>    | 912.62210 | 889.63129 | 1.743 |
| C48H91NO13     | 1 | [M+Na] <sup>+</sup>    | 912.64150 | 889.64905 | 3.544 |
| C52H92NO8P     | 2 | [M+Na] <sup>+</sup>    | 912.64980 | 889.65606 | 4.954 |
| C50H100NO8P    | 1 | [M+K] <sup>+</sup>     | 912.68220 | 873.71866 | 0.430 |
| C47H89O12P     | 1 | [M-2H+K] <sup>-</sup>  | 913.56030 | 876.60917 | 2.770 |
| C48H91O12P     | 1 | [M+Na] <sup>+</sup>    | 913.60990 | 890.62482 | 4.531 |
| C49H95O10P     | 1 | [M+K] <sup>+</sup>     | 913.63190 | 874.66629 | 2.694 |
| C57H94O6       | 1 | [M+K] <sup>+</sup>     | 913.67270 | 874.70504 | 4.934 |
| C59H108O6      | 1 | [M+H] <sup>+</sup>     | 913.82000 | 912.81459 | 2.045 |
| C57H110O6      | 1 | [M+Na] <sup>+</sup>    | 913.82000 | 890.83024 | 0.588 |
| C50H86NO10P    | 1 | [M+Na] <sup>+</sup>    | 914.59110 | 891.59894 | 3.216 |
| C47H73O13P     | 2 | [M+K] <sup>+</sup>     | 915.44330 | 876.47888 | 1.383 |
| C43H72O19      | 1 | [M+Na] <sup>+</sup>    | 915.45460 | 892.46679 | 1.537 |
| C52H76O12      | 1 | [M+Na] <sup>+</sup>    | 915.51860 | 892.53368 | 4.699 |
| C49H97O10P     | 1 | [M+K] <sup>+</sup>     | 915.64750 | 876.68194 | 2.633 |
| C57H96O6       | 1 | [M+K] <sup>+</sup>     | 915.67950 | 876.72069 | 4.742 |
| C58H100O6      | 1 | [M+Na] <sup>+</sup>    | 915.73750 | 892.75199 | 4.055 |
| C59H110O6      | 1 | [M+H] <sup>+</sup>     | 915.83510 | 914.83024 | 2.641 |
| C52H80NO8P     | 1 | [M+K] <sup>+</sup>     | 916.52340 | 877.56216 | 2.082 |
| C47H91O12P     | 1 | [M+K] <sup>+</sup>     | 917.59170 | 878.62482 | 4.066 |
| C50H74NO10P    | 1 | [M+K] <sup>+</sup>     | 918.46410 | 879.50504 | 4.451 |
| C47H77O13P     | 1 | [M+K] <sup>+</sup>     | 919.46880 | 880.51018 | 4.931 |
| C48H81O13P     | 2 | [M+Na] <sup>+</sup>    | 919.53150 | 896.54148 | 0.865 |
| C59H92O6       | 1 | [M+Na] <sup>+</sup>    | 919.68220 | 896.68939 | 3.900 |
| C59H114O6      | 1 | [M+H] <sup>+</sup>     | 919.87170 | 918.86154 | 3.132 |
| C27H46N7O18P3S | 1 | [M+K] <sup>+</sup>     | 920.14690 | 881.18330 | 0.492 |
| C52H84NO8P     | 1 | [M+K] <sup>+</sup>     | 920.56080 | 881.59346 | 4.554 |
| C47H79O13P     | 1 | [M+K] <sup>+</sup>     | 921.48760 | 882.52583 | 1.502 |
| C59H94O6       | 1 | [M+Na] <sup>+</sup>    | 921.68990 | 898.70504 | 4.734 |
| C50H94NO10P    | 1 | [M+Na] <sup>+</sup>    | 922.65060 | 899.66154 | 0.172 |
| C47H81O13P     | 1 | [M+K] <sup>+</sup>     | 923.50350 | 884.54148 | 1.228 |
| C50H85O13P     | 1 | [M-H] <sup>-</sup>     | 923.56150 | 924.57278 | 4.346 |
| C48H87O13P     | 1 | [M-2H+Na] <sup>-</sup> | 923.56150 | 902.58843 | 1.726 |
| C49H89O12P     | 1 | [M+Na] <sup>+</sup>    | 923.60030 | 900.60917 | 2.068 |



|                |   |                        |           |           |       |
|----------------|---|------------------------|-----------|-----------|-------|
| C51H87O12P     | 1 | [M+H] <sup>+</sup>     | 923.60030 | 922.59352 | 0.537 |
| C47H98O11P2    | 1 | [M+Na] <sup>+</sup>    | 923.65070 | 900.65844 | 3.288 |
| C58H92O6       | 1 | [M+K] <sup>+</sup>     | 923.65070 | 884.68939 | 1.994 |
| C59H96O6       | 1 | [M+Na] <sup>+</sup>    | 923.70610 | 900.72069 | 4.128 |
| C60H106O6      | 1 | [M+H] <sup>+</sup>     | 923.80470 | 922.79894 | 1.644 |
| C58H108O6      | 1 | [M+Na] <sup>+</sup>    | 923.80470 | 900.81459 | 0.960 |
| C49H77O13P     | 2 | [M-2H+Na] <sup>-</sup> | 925.48340 | 904.51018 | 1.560 |
| C49H75O13P     | 3 | [M+Na] <sup>+</sup>    | 925.48690 | 902.49453 | 3.398 |
| C50H95O10P     | 1 | [M+K] <sup>+</sup>     | 925.63190 | 886.66629 | 2.659 |
| C60H108O6      | 1 | [M+H] <sup>+</sup>     | 925.82560 | 924.81459 | 4.030 |
| C50H82NO10P    | 2 | [M+K] <sup>+</sup>     | 926.53440 | 887.56764 | 3.898 |
| C49H77O13P     | 1 | [M+Na] <sup>+</sup>    | 927.49630 | 904.51018 | 3.348 |
| C61H98O6       | 1 | [M+H] <sup>+</sup>     | 927.74740 | 926.73634 | 4.075 |
| C54H108NO8P    | 1 | [M-H] <sup>-</sup>     | 928.77270 | 929.78126 | 1.387 |
| C51H77O13P     | 2 | [M+H] <sup>+</sup>     | 929.51830 | 928.51018 | 0.903 |
| C50H89O13P     | 1 | [M+H] <sup>+</sup>     | 929.60720 | 928.60408 | 4.476 |
| C48H91O13P     | 1 | [M+Na] <sup>+</sup>    | 929.60720 | 906.61973 | 1.888 |
| C50H86NO10P    | 1 | [M+K] <sup>+</sup>     | 930.56410 | 891.59894 | 2.162 |
| C52H94NO8P     | 1 | [M+K] <sup>+</sup>     | 930.63270 | 891.67171 | 2.319 |
| C48H93NO12S    | 1 | [M+Na] <sup>+</sup>    | 930.63270 | 907.64185 | 1.747 |
| C56H99NO9      | 2 | [M+H] <sup>+</sup>     | 930.74360 | 929.73199 | 4.661 |
| C43H72O19      | 3 | [M+K] <sup>+</sup>     | 931.43160 | 892.46679 | 1.787 |
| C51H95O12P     | 1 | [M+H] <sup>+</sup>     | 931.66750 | 930.65612 | 4.405 |
| C60H92O6       | 1 | [M+Na] <sup>+</sup>    | 931.68320 | 908.68939 | 4.923 |
| C59H104O6      | 1 | [M+Na] <sup>+</sup>    | 931.77700 | 908.78329 | 4.816 |
| C61H102O6      | 1 | [M+H] <sup>+</sup>     | 931.77700 | 930.76764 | 2.233 |
| C46H76O19      | 2 | [M+H] <sup>+</sup>     | 933.50460 | 932.49809 | 0.817 |
| C51H81O13P     | 3 | [M+H] <sup>+</sup>     | 933.55110 | 932.54148 | 2.505 |
| C51H80O15      | 2 | [M+H] <sup>+</sup>     | 933.55270 | 932.54973 | 4.609 |
| C47H91O13P     | 1 | [M+K] <sup>+</sup>     | 933.57890 | 894.61973 | 4.267 |
| C48H95O12P     | 1 | [M+K] <sup>+</sup>     | 933.61930 | 894.65612 | 0.033 |
| C60H116O6      | 1 | [M+H] <sup>+</sup>     | 933.88260 | 932.87719 | 2.001 |
| C52H98NO8P     | 1 | [M+K] <sup>+</sup>     | 934.66970 | 895.70301 | 3.790 |
| C49H85O13P     | 2 | [M+Na] <sup>+</sup>    | 935.55800 | 912.57278 | 4.281 |
| C51H83O13P     | 1 | [M+H] <sup>+</sup>     | 935.56300 | 934.55713 | 1.508 |
| C51H85O13P     | 1 | [M-H] <sup>-</sup>     | 935.56820 | 936.57278 | 2.871 |
| C48H83O13P     | 1 | [M+K] <sup>+</sup>     | 937.51990 | 898.55713 | 0.410 |
| C31H54N7O18P3S | 1 | [M+H] <sup>+</sup>     | 938.25010 | 937.24590 | 3.276 |
| C43H82O16P2    | 1 | [M+Na] <sup>+</sup>    | 939.49290 | 916.50782 | 4.404 |
| C60H100O6      | 1 | [M+Na] <sup>+</sup>    | 939.73840 | 916.75199 | 2.993 |
| C50H95NO13     | 2 | [M+Na] <sup>+</sup>    | 940.67140 | 917.68035 | 1.950 |
| C50H98NO10P    | 1 | [M+K] <sup>+</sup>     | 942.65770 | 903.69284 | 1.816 |
| C52H72O14      | 1 | [M+Na] <sup>+</sup>    | 943.48150 | 920.49221 | 0.072 |
| C49H93O13P     | 1 | [M+Na] <sup>+</sup>    | 943.62130 | 920.63538 | 3.502 |
| C61H114O6      | 1 | [M+H] <sup>+</sup>     | 943.86990 | 942.86154 | 1.145 |
| C59H104O6      | 1 | [M-2H+K] <sup>-</sup>  | 945.72870 | 908.78329 | 3.375 |
| C61H118O6      | 2 | [M-H] <sup>-</sup>     | 945.88310 | 946.89284 | 2.613 |
| C49H81O13P     | 1 | [M+K] <sup>+</sup>     | 947.50290 | 908.54148 | 1.830 |
| C45H82O15P2    | 1 | [M+Na] <sup>+</sup>    | 947.50290 | 924.51290 | 0.820 |
| C51H95O13P     | 1 | [M+H] <sup>+</sup>     | 947.65510 | 946.65103 | 3.388 |
| C59H104O6      | 1 | [M+K] <sup>+</sup>     | 947.74390 | 908.78329 | 2.682 |
| C54H104NO8P    | 1 | [M+Na] <sup>+</sup>    | 948.74090 | 925.74996 | 1.814 |
| C43H82O16P2    | 2 | [M-2H+K] <sup>-</sup>  | 953.45660 | 916.50782 | 0.192 |

|                |   |                        |           |           |       |
|----------------|---|------------------------|-----------|-----------|-------|
| C51H78O15      | 1 | [M+Na] <sup>+</sup>    | 953.52390 | 930.53408 | 0.632 |
| C61H104O6      | 1 | [M+Na] <sup>+</sup>    | 955.77690 | 932.78329 | 4.590 |
| C63H102O6      | 1 | [M+H] <sup>+</sup>     | 955.77690 | 954.76764 | 2.073 |
| C62H114O6      | 1 | [M+H] <sup>+</sup>     | 955.86690 | 954.86154 | 2.008 |
| C60H116O6      | 1 | [M+Na] <sup>+</sup>    | 955.86690 | 932.87719 | 0.509 |
| C50H97O12P     | 1 | [M-2H+K] <sup>-</sup>  | 957.62430 | 920.67177 | 4.105 |
| C52H93O13P     | 1 | [M+H] <sup>+</sup>     | 957.63970 | 956.63538 | 3.092 |
| C50H95O13P     | 2 | [M+Na] <sup>+</sup>    | 957.63970 | 934.65103 | 0.580 |
| C51H99O12P     | 1 | [M+Na] <sup>+</sup>    | 957.67900 | 934.68742 | 2.464 |
| C60H104O6      | 1 | [M-2H+K] <sup>-</sup>  | 957.73520 | 920.78329 | 3.454 |
| C51H101O12P    | 1 | [M+Na] <sup>+</sup>    | 959.69360 | 936.70307 | 1.365 |
| C52H91NO13     | 1 | [M+Na] <sup>+</sup>    | 960.63930 | 937.64905 | 1.076 |
| C45H82O15P2    | 1 | [M+K] <sup>+</sup>     | 963.47470 | 924.51290 | 1.403 |
| C52H76O14      | 1 | [M+K] <sup>+</sup>     | 963.49030 | 924.52351 | 3.777 |
| C64H98O6       | 1 | [M+H] <sup>+</sup>     | 963.74150 | 962.73634 | 2.199 |
| C62H100O6      | 1 | [M+Na] <sup>+</sup>    | 963.74150 | 940.75199 | 0.298 |
| C61H112O6      | 1 | [M+Na] <sup>+</sup>    | 963.83910 | 940.84589 | 4.137 |
| C63H110O6      | 1 | [M+H] <sup>+</sup>     | 963.83910 | 962.83024 | 1.640 |
| C33H56N7O18P3S | 1 | [M+H] <sup>+</sup>     | 964.26580 | 963.26155 | 3.136 |
| C62H104O6      | 1 | [M-2H+Na] <sup>-</sup> | 965.75420 | 944.78329 | 3.885 |
| C63H114O6      | 2 | [M-H] <sup>-</sup>     | 965.85090 | 966.86154 | 3.491 |
| C61H116O6      | 2 | [M-2H+Na] <sup>-</sup> | 965.85090 | 944.87719 | 0.986 |
| C54H95NO13     | 1 | [M+H] <sup>+</sup>     | 966.69070 | 965.68035 | 3.184 |
| C61H100O6      | 1 | [M+K] <sup>+</sup>     | 967.71290 | 928.75199 | 2.317 |
| C63H116O6      | 1 | [M-H] <sup>-</sup>     | 967.87180 | 968.87719 | 1.940 |
| C54H108NO8P    | 1 | [M+K] <sup>+</sup>     | 968.74670 | 929.78126 | 2.366 |
| C51H79O13P     | 1 | [M+K] <sup>+</sup>     | 969.48990 | 930.52583 | 0.945 |
| C52H101NO13    | 1 | [M+Na] <sup>+</sup>    | 970.71470 | 947.72730 | 1.872 |
| C51H97O13P     | 1 | [M+Na] <sup>+</sup>    | 971.65820 | 948.66668 | 2.362 |
| C53H95O13P     | 1 | [M+H] <sup>+</sup>     | 971.65820 | 970.65103 | 0.114 |
| C63H96O6       | 1 | [M+Na] <sup>+</sup>    | 971.70620 | 948.72069 | 3.821 |
| C35H60N7O17P3S | 1 | [M-H] <sup>-</sup>     | 974.28950 | 975.29793 | 1.193 |
| C46H82O16P2    | 2 | [M+Na] <sup>+</sup>    | 975.49690 | 952.50782 | 0.141 |
| C52H89O13P     | 1 | [M+Na] <sup>+</sup>    | 975.59790 | 952.60408 | 4.710 |
| C61H108O6      | 2 | [M+K] <sup>+</sup>     | 975.77970 | 936.81459 | 2.007 |
| C62H114O6      | 1 | [M-2H+Na] <sup>-</sup> | 975.83170 | 954.86154 | 4.613 |
| C44H81N3O15P2  | 1 | [M+Na] <sup>+</sup>    | 976.50420 | 953.51430 | 0.697 |
| C51H87O13P     | 1 | [M+K] <sup>+</sup>     | 977.54890 | 938.58843 | 2.746 |
| C62H116O6      | 1 | [M-2H+Na] <sup>-</sup> | 977.85490 | 956.87719 | 3.117 |
| C64H114O6      | 1 | [M-H] <sup>-</sup>     | 977.85490 | 978.86154 | 0.642 |
| C57H108NO9P    | 1 | [M-H] <sup>-</sup>     | 980.76880 | 981.77617 | 0.105 |
| C63H108O6      | 1 | [M+Na] <sup>+</sup>    | 983.80030 | 960.81459 | 3.571 |
| C63H110O6      | 1 | [M-2H+Na] <sup>-</sup> | 983.80620 | 962.83024 | 1.319 |
| C65H108O6      | 1 | [M-H] <sup>-</sup>     | 983.80620 | 984.81459 | 1.140 |
| C62H120O6      | 1 | [M+Na] <sup>+</sup>    | 983.90260 | 960.90849 | 4.967 |
| C64H118O6      | 1 | [M+H] <sup>+</sup>     | 983.90260 | 982.89284 | 2.522 |
| C58H116NO8P    | 1 | [M-H] <sup>-</sup>     | 984.83990 | 985.84386 | 3.363 |
| C63H112O6      | 2 | [M-2H+Na] <sup>-</sup> | 985.81710 | 964.84589 | 3.502 |
| C65H110O6      | 2 | [M-H] <sup>-</sup>     | 985.82480 | 986.83024 | 1.854 |
| C33H56N7O17P3S | 1 | [M+K] <sup>+</sup>     | 986.23430 | 947.26663 | 4.581 |
| C57H106NO8P    | 1 | [M+Na] <sup>+</sup>    | 986.75130 | 963.76561 | 3.576 |
| C53H89O13P     | 2 | [M+Na] <sup>+</sup>    | 987.59040 | 964.60408 | 2.941 |
| C63H112O6      | 1 | [M+Na] <sup>+</sup>    | 987.83250 | 964.84589 | 2.645 |

|                |   |                        |            |            |       |
|----------------|---|------------------------|------------|------------|-------|
| C65H112O6      | 1 | [M+H] <sup>+</sup>     | 989.85130  | 988.84589  | 1.888 |
| C63H114O6      | 1 | [M+Na] <sup>+</sup>    | 989.85130  | 966.86154  | 0.543 |
| C46H82O16P2    | 1 | [M+K] <sup>+</sup>     | 991.46770  | 952.50782  | 3.295 |
| C63H118O6      | 1 | [M+Na] <sup>+</sup>    | 993.88700  | 970.89284  | 4.967 |
| C65H116O6      | 1 | [M+H] <sup>+</sup>     | 993.88700  | 992.87719  | 2.547 |
| C66H106O6      | 1 | [M+H] <sup>+</sup>     | 995.81110  | 994.79894  | 4.902 |
| C63H120O6      | 1 | [M+Na] <sup>+</sup>    | 995.90200  | 972.90849  | 4.305 |
| C65H118O6      | 1 | [M+H] <sup>+</sup>     | 995.90200  | 994.89284  | 1.889 |
| C53H83O13P     | 1 | [M+K] <sup>+</sup>     | 997.52380  | 958.55713  | 3.525 |
| C63H106O6      | 1 | [M+K] <sup>+</sup>     | 997.76070  | 958.79894  | 1.395 |
| C66H108O6      | 1 | [M+H] <sup>+</sup>     | 997.81950  | 996.81459  | 2.374 |
| C64H110O6      | 1 | [M+Na] <sup>+</sup>    | 997.81950  | 974.83024  | 0.037 |
| C54H105NO13    | 1 | [M+Na] <sup>+</sup>    | 998.74670  | 975.75860  | 1.118 |
| C67H98O6       | 1 | [M+H] <sup>+</sup>     | 999.74690  | 998.73634  | 3.282 |
| C46H83N3O15P2  | 1 | [M-2H+Na] <sup>-</sup> | 1000.50110 | 979.52995  | 3.506 |
| C48H85N3O15P2  | 1 | [M-H] <sup>-</sup>     | 1004.53880 | 1005.54560 | 0.470 |
| C53H93O13P     | 1 | [M-2H+K] <sup>-</sup>  | 1005.58010 | 968.63538  | 3.862 |
| C53H95O13P     | 1 | [M-2H+K] <sup>-</sup>  | 1007.59570 | 970.65103  | 3.904 |
| C64H124O6      | 1 | [M-2H+Na] <sup>-</sup> | 1009.91660 | 988.93979  | 2.127 |
| C66H122O6      | 1 | [M-H] <sup>-</sup>     | 1009.91660 | 1010.92414 | 0.269 |
| C66H125NO5     | 3 | [M-H] <sup>-</sup>     | 1010.94400 | 1011.95578 | 4.457 |
| C66H128O6      | 1 | [M-H] <sup>-</sup>     | 1015.96400 | 1016.97109 | 0.175 |
| C66H112O6      | 1 | [M-2H+K] <sup>-</sup>  | 1037.79140 | 1000.84589 | 2.979 |
| C68H132O6      | 3 | [M-H] <sup>-</sup>     | 1043.99190 | 1045.00239 | 3.086 |
| C69H126O6      | 3 | [M-H] <sup>-</sup>     | 1049.94370 | 1050.95544 | 4.259 |
| C67H128O6      | 2 | [M-2H+Na] <sup>-</sup> | 1049.94370 | 1028.97109 | 1.954 |
| C69H128O6      | 3 | [M-H] <sup>-</sup>     | 1051.96010 | 1052.97109 | 3.538 |
| C67H130O6      | 3 | [M-2H+Na] <sup>-</sup> | 1051.96010 | 1030.98674 | 1.238 |
| C43H77N3O20P2  | 1 | [M-2H+K] <sup>-</sup>  | 1054.40760 | 1017.45757 | 1.353 |
| C69H132O6      | 4 | [M-H] <sup>-</sup>     | 1055.99050 | 1057.00239 | 4.377 |
| C69H134O6      | 1 | [M-H] <sup>-</sup>     | 1058.01120 | 1059.01804 | 0.405 |
| C68H128O6      | 1 | [M-2H+Na] <sup>-</sup> | 1061.94120 | 1040.97109 | 4.286 |
| C51H84O23      | 2 | [M-H] <sup>-</sup>     | 1063.53210 | 1064.54035 | 0.919 |
| C52H88O22      | 2 | [M-H] <sup>-</sup>     | 1063.56890 | 1064.57673 | 0.528 |
| C68H130O6      | 2 | [M-2H+Na] <sup>-</sup> | 1063.96060 | 1042.98674 | 0.754 |
| C69H120O6      | 1 | [M-2H+Na] <sup>-</sup> | 1065.88610 | 1044.90849 | 2.766 |
| C52H86O20      | 1 | [M-2H+K] <sup>-</sup>  | 1067.52100 | 1030.57125 | 1.075 |
| C68H118O6      | 1 | [M-2H+K] <sup>-</sup>  | 1067.83660 | 1030.89284 | 4.534 |
| C52H86O23      | 3 | [M-H] <sup>-</sup>     | 1077.54940 | 1078.55600 | 0.625 |
| C51H82O23      | 2 | [M-2H+Na] <sup>-</sup> | 1083.49440 | 1062.52470 | 4.575 |
| C43H78N7O17P3S | 2 | [M-H] <sup>-</sup>     | 1088.43650 | 1089.43878 | 4.583 |
| C52H86O22      | 1 | [M-2H+K] <sup>-</sup>  | 1099.50580 | 1062.56108 | 3.531 |
| C45H68N7O17P3S | 1 | [M-H] <sup>-</sup>     | 1102.35820 | 1103.36053 | 4.480 |
| C45H74N7O17P3S | 1 | [M-H] <sup>-</sup>     | 1108.39680 | 1109.40748 | 3.078 |
| C43H76N7O17P3S | 1 | [M-2H+Na] <sup>-</sup> | 1108.39680 | 1087.42313 | 0.895 |
| C66H107O10P    | 1 | [M-2H+Na] <sup>-</sup> | 1111.73370 | 1090.76019 | 1.034 |
| C61H112N2O16   | 1 | [M-2H+Na] <sup>-</sup> | 1149.77520 | 1128.80119 | 0.564 |
| C77H150O3      | 2 | [M-2H+K] <sup>-</sup>  | 1160.10280 | 1123.15850 | 3.705 |
| C62H114N2O18   | 2 | [M-H] <sup>-</sup>     | 1173.80220 | 1174.80667 | 2.386 |
| C58H107NO21    | 1 | [M-2H+Na] <sup>-</sup> | 1174.71180 | 1153.73357 | 3.042 |
| C62H116N2O18   | 1 | [M-H] <sup>-</sup>     | 1175.81150 | 1176.82232 | 3.019 |
| C85H140O       | 3 | [M-H] <sup>-</sup>     | 1176.08120 | 1177.09042 | 1.655 |
| C62H117NO18    | 1 | [M-2H+Na] <sup>-</sup> | 1184.80310 | 1163.82707 | 1.155 |

|               |   |            |            |            |       |
|---------------|---|------------|------------|------------|-------|
| C57H104N2O21  | 1 | [M-2H+K]-  | 1189.66000 | 1152.71316 | 1.483 |
| C56H94O27     | 2 | [M-H]-     | 1197.58900 | 1198.59826 | 1.659 |
| C58H107NO22   | 1 | [M-2H+K]-  | 1206.68120 | 1169.72848 | 3.414 |
| C57H92O27     | 1 | [M-H]-     | 1207.57350 | 1208.58261 | 1.521 |
| C62H115NO22   | 1 | [M-H]-     | 1224.78920 | 1225.79108 | 4.400 |
| C56H92O29     | 1 | [M-H]-     | 1227.56690 | 1228.57244 | 1.412 |
| C65H119NO21   | 1 | [M-H]-     | 1248.82600 | 1249.82747 | 4.648 |
| C57H96O28     | 1 | [M-2H+Na]- | 1249.58000 | 1228.60882 | 2.787 |
| C59H100O26    | 1 | [M-2H+K]-  | 1261.59310 | 1224.65029 | 4.591 |
| C64H119NO21   | 1 | [M-2H+K]-  | 1274.77180 | 1237.82747 | 3.346 |
| C66H123NO21   | 1 | [M-2H+Na]- | 1286.83190 | 1265.85877 | 1.186 |
| C66H121NO21   | 1 | [M-2H+K]-  | 1300.79530 | 1263.84312 | 2.755 |
| C64H118N2O23  | 1 | [M-2H+Na]- | 1303.79180 | 1282.81255 | 3.524 |
| C68H125NO22   | 2 | [M-H]-     | 1306.86630 | 1307.86933 | 3.244 |
| C70H134O17P2  | 1 | [M-H]-     | 1307.90240 | 1308.90963 | 0.029 |
| C66H122N2O23  | 1 | [M-H]-     | 1309.83180 | 1310.84385 | 3.645 |
| C63H114N2O26  | 3 | [M-H]-     | 1313.75650 | 1314.76599 | 1.690 |
| C68H129N2O20P | 1 | [M-H]-     | 1323.88310 | 1324.88764 | 2.064 |
| C67H124N2O21  | 1 | [M-2H+K]-  | 1329.82190 | 1292.86967 | 2.733 |
| C68H127NO21   | 1 | [M-2H+K]-  | 1330.83880 | 1293.89007 | 0.101 |
| C68H127NO22   | 2 | [M-2H+Na]- | 1330.85980 | 1309.88498 | 0.119 |
| C66H123NO23   | 1 | [M-2H+K]-  | 1334.80080 | 1297.84860 | 2.700 |
| C68H124N2O23  | 2 | [M-H]-     | 1335.84970 | 1336.85950 | 1.890 |
| C68H126N2O23  | 1 | [M-H]-     | 1337.86130 | 1338.87515 | 4.915 |
| C66H121N3O23  | 1 | [M-2H+Na]- | 1344.81320 | 1323.83909 | 0.411 |
| C68H125NO23   | 4 | [M-2H+Na]- | 1344.83770 | 1323.86425 | 0.897 |
| C80H128O14    | 1 | [M-2H+K]-  | 1349.87290 | 1312.93041 | 4.528 |
| C64H117NO28   | 1 | [M-2H+Na]- | 1368.75680 | 1347.77622 | 4.324 |
| C66H120N2O28  | 2 | [M-H]-     | 1387.79400 | 1388.80277 | 1.081 |
| C70H130N2O23  | 1 | [M-2H+Na]- | 1387.88450 | 1366.90645 | 2.446 |
| C66H120N2O27  | 2 | [M-2H+Na]- | 1393.78230 | 1372.80786 | 0.154 |
| C69H126N2O26  | 1 | [M-H]-     | 1397.85440 | 1398.85989 | 1.273 |
| C68H125NO28   | 1 | [M-H]-     | 1402.83480 | 1403.83882 | 2.316 |
| C77H146O17P2  | 3 | [M-H]-     | 1403.99700 | 1405.00353 | 0.525 |
| C67H121N3O26  | 1 | [M-2H+Na]- | 1404.79720 | 1383.82384 | 0.924 |
| C72H133N3O23  | 1 | [M-H]-     | 1406.91880 | 1407.93299 | 4.921 |
| C68H125NO27   | 1 | [M-2H+Na]- | 1408.81330 | 1387.84391 | 3.738 |
| C95H157O4P    | 1 | [M-2H+Na]- | 1414.14990 | 1393.18195 | 4.745 |
| C71H130N2O26  | 2 | [M-H]-     | 1425.87690 | 1426.89119 | 4.923 |
| C72H131N3O23  | 1 | [M-2H+Na]- | 1426.89290 | 1405.91734 | 0.629 |
| C70H128N2O27  | 2 | [M-H]-     | 1427.86050 | 1428.87046 | 1.880 |
| C72H133NO27   | 2 | [M-H]-     | 1442.90390 | 1443.90651 | 3.232 |
| C70H128N2O28  | 2 | [M-H]-     | 1443.85830 | 1444.86537 | 0.139 |
| C73H132N2O26  | 4 | [M-H]-     | 1451.89440 | 1452.90684 | 3.561 |
| C73H134N2O26  | 2 | [M-H]-     | 1453.91610 | 1454.92249 | 0.605 |
| C70H127N3O28  | 1 | [M-H]-     | 1456.85220 | 1457.86062 | 0.788 |
| C72H131NO28   | 2 | [M-H]-     | 1456.88290 | 1457.88577 | 3.019 |
| C74H135NO27   | 4 | [M-H]-     | 1468.90980 | 1469.92216 | 3.462 |
| C81H142O17P2  | 1 | [M-2H+Na]- | 1469.94520 | 1448.97223 | 1.152 |
| C74H137NO27   | 3 | [M-H]-     | 1470.92750 | 1471.93781 | 2.064 |
| C69H124N2O31  | 2 | [M-H]-     | 1475.81610 | 1476.81882 | 3.086 |
| C72H131NO27   | 1 | [M-2H+K]-  | 1478.84330 | 1441.89086 | 2.599 |
| C74H134N2O27  | 1 | [M-H]-     | 1481.91090 | 1482.91741 | 0.516 |

|                |   |            |            |            |       |
|----------------|---|------------|------------|------------|-------|
| C73H133N3O27   | 3 | [M-H]-     | 1482.90540 | 1483.91265 | 0.011 |
| C70H125N3O29   | 2 | [M-2H+Na]- | 1492.81870 | 1471.83988 | 2.785 |
| C72H133NO28    | 1 | [M-2H+K]-  | 1496.85260 | 1459.90142 | 1.723 |
| C72H129N3O29   | 2 | [M-H]-     | 1498.85720 | 1499.87118 | 4.479 |
| C81H142O19P2   | 1 | [M-2H+Na]- | 1501.93070 | 1480.96206 | 4.010 |
| C74H136N2O27   | 1 | [M-2H+Na]- | 1505.91410 | 1484.93306 | 4.240 |
| C72H131N3O28   | 1 | [M-2H+Na]- | 1506.86740 | 1485.89192 | 0.545 |
| C75H135N3O27   | 2 | [M-H]-     | 1508.92440 | 1509.92830 | 2.231 |
| C72H130N2O31   | 2 | [M-H]-     | 1517.85360 | 1518.86577 | 3.225 |
| C74H135NO28    | 2 | [M-2H+K]-  | 1522.85970 | 1485.91707 | 3.921 |
| C74H133N3O27   | 1 | [M-2H+K]-  | 1532.85910 | 1495.91265 | 1.405 |
| C81H142O21P2   | 1 | [M-2H+Na]- | 1533.92640 | 1512.95189 | 0.100 |
| C74H133N3O29   | 1 | [M-2H+Na]- | 1548.88080 | 1527.90248 | 2.360 |
| C72H130N2O33   | 1 | [M-H]-     | 1549.84320 | 1550.85560 | 3.307 |
| C76H135N3O29   | 2 | [M-H]-     | 1552.90860 | 1553.91813 | 1.458 |
| C75H136N2O31   | 1 | [M-H]-     | 1559.90160 | 1560.91272 | 2.465 |
| C76H138N2O28   | 1 | [M-2H+K]-  | 1563.89640 | 1526.94362 | 2.673 |
| C89H166O17P2   | 2 | [M-H]-     | 1568.14940 | 1569.16003 | 2.145 |
| C73H132N2O31   | 1 | [M-2H+K]-  | 1569.82640 | 1532.88142 | 2.303 |
| C75H135N3O31   | 1 | [M-H]-     | 1572.90700 | 1573.90796 | 4.009 |
| C76H137N3O28   | 1 | [M-2H+K]-  | 1576.87990 | 1539.93887 | 4.800 |
| C76H139N3O28   | 1 | [M-2H+K]-  | 1578.90780 | 1541.95452 | 2.965 |
| C78H139N3O29   | 3 | [M-H]-     | 1580.93790 | 1581.94943 | 2.697 |
| C78H141N3O29   | 4 | [M-H]-     | 1582.95330 | 1583.96508 | 2.852 |
| C75H135N3O32   | 1 | [M-H]-     | 1588.90120 | 1589.90288 | 3.519 |
| C78H141N3O28   | 2 | [M-2H+Na]- | 1588.95190 | 1567.97017 | 4.450 |
| C78H143N3O28   | 1 | [M-2H+Na]- | 1590.96080 | 1569.98582 | 0.202 |
| C78H148N2O24P2 | 1 | [M-2H+K]-  | 1595.94530 | 1558.98974 | 4.364 |
| C76H138N2O33   | 2 | [M-H]-     | 1605.90810 | 1606.91820 | 1.759 |
| C77H138N2O31   | 1 | [M-2H+Na]- | 1607.91040 | 1586.92837 | 4.587 |
| C77H140N2O31   | 1 | [M-2H+Na]- | 1609.91880 | 1588.94402 | 0.078 |
| C76H138N2O31   | 1 | [M-2H+K]-  | 1611.87210 | 1574.92837 | 3.018 |
| C76H138N2O32   | 2 | [M-2H+Na]- | 1611.89970 | 1590.92328 | 1.092 |
| C94H192O13P2   | 1 | [M-2H+Na]- | 1612.36090 | 1591.38382 | 1.499 |
| C79H142N2O31   | 2 | [M-H]-     | 1613.94700 | 1614.95967 | 3.343 |
| C76H139NO33    | 1 | [M-2H+Na]- | 1614.89840 | 1593.92295 | 0.492 |
| C79H144N2O31   | 2 | [M-H]-     | 1615.97180 | 1616.97532 | 2.324 |
| C78H141NO33    | 1 | [M-H]-     | 1618.93120 | 1619.93860 | 0.078 |
| C77H139N3O31   | 1 | [M-2H+Na]- | 1622.91770 | 1601.93926 | 2.327 |
| C79H141N3O31   | 3 | [M-H]-     | 1626.94070 | 1627.95491 | 4.268 |
| C79H143N3O31   | 2 | [M-H]-     | 1628.96110 | 1629.97056 | 1.347 |
| C78H141N3O32   | 2 | [M-H]-     | 1630.94270 | 1631.94983 | 0.086 |
| C76H136N4O33   | 2 | [M-H]-     | 1631.90230 | 1632.90869 | 0.538 |
| C78H142N2O33   | 1 | [M-H]-     | 1633.93500 | 1634.94950 | 4.422 |
| C77H139N3O32   | 2 | [M-2H+Na]- | 1638.90790 | 1617.93418 | 0.573 |
| C76H137N3O32   | 1 | [M-2H+K]-  | 1640.86920 | 1603.91853 | 1.262 |
| C78H141N3O33   | 3 | [M-H]-     | 1646.94000 | 1647.94474 | 1.534 |
| C77H138N2O35   | 1 | [M-H]-     | 1649.89800 | 1650.90803 | 1.670 |
| C76H137N3O33   | 2 | [M-2H+K]-  | 1656.85780 | 1619.91344 | 2.561 |
| C82H150N2O31   | 1 | [M-H]-     | 1658.00930 | 1659.02227 | 3.435 |
| C75H134N2O35   | 1 | [M-2H+K]-  | 1659.83170 | 1622.87673 | 3.841 |
| C78H140N4O33   | 3 | [M-H]-     | 1659.92650 | 1660.93999 | 3.748 |
| C77H137N3O35   | 3 | [M-H]-     | 1662.89230 | 1663.90327 | 2.227 |

|              |   |            |            |            |       |
|--------------|---|------------|------------|------------|-------|
| C80H146N2O31 | 1 | [M-2H+K]-  | 1667.93820 | 1630.99097 | 0.818 |
| C80H146N2O32 | 1 | [M-2H+Na]- | 1667.96280 | 1646.98588 | 1.355 |
| C81H145N3O32 | 1 | [M-H]-     | 1670.98160 | 1671.98113 | 4.633 |
| C82H150N2O32 | 1 | [M-H]-     | 1674.00540 | 1675.01718 | 2.694 |
| C80H145N3O33 | 1 | [M-H]-     | 1674.96970 | 1675.97604 | 0.553 |
| C77H137N3O36 | 3 | [M-H]-     | 1678.88500 | 1679.89819 | 3.526 |
| C79H141N3O32 | 1 | [M-2H+K]-  | 1680.89950 | 1643.94983 | 0.637 |
| C80H145N3O32 | 1 | [M-2H+Na]- | 1680.95240 | 1659.98113 | 2.016 |
| C80H144N4O33 | 2 | [M-H]-     | 1687.96920 | 1688.97129 | 3.068 |
| C82H150N2O33 | 4 | [M-H]-     | 1689.99950 | 1691.01210 | 3.151 |
| C79H141N3O35 | 2 | [M-H]-     | 1690.92790 | 1691.93457 | 0.352 |
| C82H148N2O31 | 1 | [M-2H+K]-  | 1693.94990 | 1657.00662 | 3.138 |
| C78H140N2O37 | 2 | [M-H]-     | 1695.89880 | 1696.91351 | 4.384 |
| C78H138N4O34 | 1 | [M-2H+Na]- | 1695.89880 | 1674.91926 | 2.879 |
| C82H147N3O33 | 4 | [M-H]-     | 1700.97760 | 1701.99169 | 4.012 |
| C82H149N3O33 | 3 | [M-H]-     | 1703.00480 | 1704.00734 | 2.775 |
| C79H141N3O36 | 3 | [M-H]-     | 1706.92650 | 1707.92949 | 2.508 |
| C80H144N2O36 | 3 | [M-H]-     | 1707.94110 | 1708.94989 | 0.890 |
| C76H137N038  | 1 | [M-2H+K]-  | 1708.83850 | 1671.88187 | 4.699 |
| C82H148N2O32 | 1 | [M-2H+K]-  | 1709.94330 | 1673.00153 | 3.994 |
| C82H148N2O33 | 1 | [M-2H+Na]- | 1709.96550 | 1688.99645 | 3.278 |
| C84H151N3O32 | 5 | [M-H]-     | 1713.02540 | 1714.02808 | 2.680 |
| C84H153N3O32 | 3 | [M-H]-     | 1715.03640 | 1716.04373 | 0.034 |
| C82H148N4O33 | 2 | [M-H]-     | 1715.99770 | 1717.00259 | 1.385 |
| C77H137N3O37 | 1 | [M-2H+Na]- | 1716.87630 | 1695.89310 | 4.972 |
| C78H141N038  | 2 | [M-2H+Na]- | 1720.88380 | 1699.91317 | 2.342 |
| C80H144N2O37 | 2 | [M-H]-     | 1723.94340 | 1724.94481 | 3.402 |
| C82H146N4O34 | 2 | [M-H]-     | 1729.97710 | 1730.98186 | 1.452 |
| C84H153N3O33 | 2 | [M-H]-     | 1731.02800 | 1732.03864 | 1.949 |
| C79H138N4O37 | 1 | [M-H]-     | 1733.89220 | 1734.90400 | 2.614 |
| C81H145N3O36 | 1 | [M-H]-     | 1734.95700 | 1735.96079 | 2.006 |
| C79H140N4O37 | 1 | [M-H]-     | 1735.91200 | 1736.91965 | 0.220 |
| C82H148N2O36 | 3 | [M-H]-     | 1735.96600 | 1736.98119 | 4.562 |
| C80H144N2O38 | 5 | [M-H]-     | 1739.93010 | 1740.93972 | 1.351 |
| C84H150N4O33 | 1 | [M-H]-     | 1742.00960 | 1743.01824 | 0.788 |
| C80H143N3O36 | 1 | [M-2H+Na]- | 1742.92490 | 1721.94514 | 2.927 |
| C84H152N4O33 | 3 | [M-H]-     | 1744.02190 | 1745.03389 | 2.708 |
| C78H138N2O39 | 2 | [M-2H+Na]- | 1747.85450 | 1726.88769 | 4.488 |
| C80H145N038  | 1 | [M-2H+Na]- | 1748.91470 | 1727.94447 | 2.534 |
| C82H147N3O36 | 3 | [M-H]-     | 1748.96670 | 1749.97644 | 1.412 |
| C78H140N2O38 | 1 | [M-2H+K]-  | 1749.85440 | 1712.90842 | 1.497 |
| C81H145N3O37 | 3 | [M-H]-     | 1750.94150 | 1751.95570 | 3.960 |
| C84H151N3O33 | 3 | [M-2H+Na]- | 1750.99420 | 1730.02299 | 1.973 |
| C82H148N2O37 | 2 | [M-H]-     | 1751.96860 | 1752.97611 | 0.134 |
| C80H142N2O39 | 3 | [M-H]-     | 1753.91590 | 1754.91899 | 2.386 |
| C83H148N2O35 | 2 | [M-2H+Na]- | 1753.96620 | 1732.98628 | 3.002 |
| C82H149N038  | 2 | [M-H]-     | 1754.97610 | 1755.97577 | 4.329 |
| C81H145N3O35 | 1 | [M-2H+K]-  | 1756.90770 | 1719.96587 | 3.856 |
| C79H141N3O37 | 1 | [M-2H+K]-  | 1760.86710 | 1723.92440 | 3.353 |
| C81H142N4O37 | 2 | [M-H]-     | 1761.93600 | 1762.93530 | 4.522 |
| C85H154N2O35 | 3 | [M-H]-     | 1762.03270 | 1763.03323 | 3.828 |
| C83H149N3O36 | 3 | [M-H]-     | 1762.98910 | 1763.99209 | 2.428 |
| C84H152N2O36 | 2 | [M-H]-     | 1764.00800 | 1765.01249 | 1.576 |

|                |   |            |            |            |       |
|----------------|---|------------|------------|------------|-------|
| C82H147N3O37   | 2 | [M-H]-     | 1764.96960 | 1765.97135 | 3.125 |
| C80H141N3O39   | 2 | [M-H]-     | 1766.90820 | 1767.91423 | 0.700 |
| C82H148N2O38   | 3 | [M-H]-     | 1767.96470 | 1768.97102 | 0.537 |
| C83H149N3O35   | 2 | [M-2H+Na]- | 1768.96590 | 1747.99717 | 3.354 |
| C81H144N4O36   | 1 | [M-2H+Na]- | 1769.92990 | 1748.95604 | 0.451 |
| C86H154N4O33   | 4 | [M-H]-     | 1770.04280 | 1771.04954 | 0.298 |
| C98H195O21PS   | 3 | [M-H]-     | 1770.35860 | 1771.36493 | 0.532 |
| C83H150N2O35   | 2 | [M-2H+K]-  | 1771.95130 | 1735.00193 | 0.437 |
| C86H156N4O33   | 2 | [M-H]-     | 1772.05780 | 1773.06519 | 0.069 |
| C85H151N3O35   | 1 | [M-H]-     | 1773.00780 | 1774.01282 | 1.267 |
| C80H143N3O37   | 1 | [M-2H+K]-  | 1774.89440 | 1737.94005 | 3.237 |
| C80H143N3O38   | 1 | [M-2H+Na]- | 1774.90390 | 1753.93497 | 3.228 |
| C85H153N3O35   | 3 | [M-H]-     | 1775.02310 | 1776.02847 | 1.068 |
| C81H140N4O38   | 3 | [M-H]-     | 1775.89880 | 1776.91457 | 4.785 |
| C84H148N4O34   | 1 | [M-2H+Na]- | 1777.97420 | 1756.99751 | 1.143 |
| C84H150N4O34   | 2 | [M-2H+Na]- | 1779.98240 | 1759.01316 | 3.044 |
| C82H146N2O39   | 2 | [M-H]-     | 1781.94440 | 1782.95029 | 0.777 |
| C85H152N2O35   | 1 | [M-2H+Na]- | 1781.99960 | 1761.01758 | 4.133 |
| C86H152N4O34   | 2 | [M-H]-     | 1784.01770 | 1785.02881 | 2.151 |
| C83H146N4O37   | 2 | [M-H]-     | 1789.95260 | 1790.96660 | 3.762 |
| C83H148N4O37   | 1 | [M-H]-     | 1791.98210 | 1792.98225 | 3.972 |
| C86H156N2O36   | 2 | [M-H]-     | 1792.03290 | 1793.04379 | 2.020 |
| C84H151N3O37   | 2 | [M-H]-     | 1792.98650 | 1794.00265 | 4.955 |
| C84H152N2O38   | 5 | [M-H]-     | 1795.99970 | 1797.00232 | 2.589 |
| C83H148N4O36   | 2 | [M-2H+Na]- | 1797.95480 | 1776.98734 | 4.003 |
| C87H155N3O35   | 2 | [M-H]-     | 1801.03050 | 1802.04412 | 3.528 |
| C84H152N2O37   | 1 | [M-2H+Na]- | 1801.98520 | 1781.00741 | 1.740 |
| C84H151N3O38   | 1 | [M-2H+Na]- | 1802.96660 | 1781.99142 | 0.287 |
| C85H151N3O37   | 3 | [M-H]-     | 1804.99890 | 1806.00265 | 1.948 |
| C86H155N3O36   | 2 | [M-H]-     | 1805.03010 | 1806.03904 | 0.925 |
| C86H155N3O38   | 4 | [M-H]-     | 1809.00950 | 1810.02272 | 3.290 |
| C84H150N2O39   | 4 | [M-H]-     | 1809.97150 | 1810.98159 | 1.555 |
| C85H151N3O36   | 1 | [M-2H+Na]- | 1810.98600 | 1790.00774 | 1.988 |
| C85H153N3O36   | 1 | [M-2H+Na]- | 1812.99230 | 1792.02339 | 3.171 |
| C84H151N3O36   | 1 | [M-2H+K]-  | 1814.95310 | 1778.00774 | 1.785 |
| C82H145N3O39   | 1 | [M-2H+Na]- | 1816.92140 | 1795.94553 | 0.664 |
| C85H150N4O37   | 4 | [M-H]-     | 1817.98180 | 1818.99790 | 4.859 |
| C85H152N4O37   | 4 | [M-H]-     | 1819.99740 | 1821.01355 | 4.881 |
| C84H150N4O38   | 1 | [M-H]-     | 1821.98300 | 1822.99282 | 1.398 |
| C86H154N2O38   | 3 | [M-H]-     | 1822.00500 | 1823.01797 | 3.128 |
| C86H154N4O34   | 1 | [M-2H+K]-  | 1823.98600 | 1787.04446 | 3.870 |
| C83H147N3O40   | 1 | [M-H]-     | 1824.95630 | 1825.95610 | 4.094 |
| C86H154N2O36   | 2 | [M-2H+K]-  | 1827.97070 | 1791.02814 | 3.304 |
| C85H153N3O37   | 1 | [M-2H+Na]- | 1828.98780 | 1808.01830 | 2.823 |
| C82H144N4O39   | 1 | [M-2H+Na]- | 1829.91540 | 1808.94078 | 0.023 |
| C87H154N4O36   | 1 | [M-H]-     | 1830.03530 | 1831.03429 | 4.526 |
| C96H182N2O24P2 | 1 | [M-2H+Na]- | 1830.23420 | 1809.25579 | 2.051 |
| C84H151N3O38   | 1 | [M-2H+Na]- | 1830.98000 | 1809.99757 | 4.244 |
| C88H157N3O36   | 2 | [M-H]-     | 1831.04890 | 1832.05469 | 0.809 |
| C82H147N4O3    | 4 | [M-H]-     | 1832.92210 | 1833.93470 | 2.906 |
| C88H159N3O36   | 2 | [M-H]-     | 1833.06920 | 1834.07034 | 3.345 |
| C86H152N2O39   | 4 | [M-H]-     | 1835.98240 | 1836.99724 | 4.120 |
| C88H160N2O37   | 3 | [M-H]-     | 1836.05770 | 1837.07001 | 2.742 |

|              |   |            |            |            |       |
|--------------|---|------------|------------|------------|-------|
| C83H144N4O38 | 1 | [M-2H+K]-  | 1841.88860 | 1804.94587 | 3.186 |
| C84H149N3O39 | 1 | [M-2H+Na]- | 1844.94550 | 1823.97683 | 3.249 |
| C87H154N4O37 | 1 | [M-H]-     | 1846.02050 | 1847.02920 | 0.776 |
| C86H152N4O38 | 2 | [M-H]-     | 1847.99940 | 1849.00847 | 0.973 |
| C87H156N4O37 | 2 | [M-H]-     | 1848.04530 | 1849.04485 | 4.176 |
| C88H158N2O38 | 2 | [M-H]-     | 1850.03880 | 1851.04927 | 1.730 |
| C85H148N4O38 | 3 | [M-2H+Na]- | 1853.95880 | 1832.97717 | 3.761 |
| C87H155N3O36 | 1 | [M-2H+K]-  | 1854.98300 | 1818.03904 | 2.501 |
| C87H155N3O37 | 2 | [M-2H+Na]- | 1855.01140 | 1834.03395 | 1.502 |
| C88H158N2O36 | 1 | [M-2H+K]-  | 1856.00910 | 1819.05944 | 0.571 |
| C88H158N2O37 | 2 | [M-2H+Na]- | 1856.02240 | 1835.05436 | 3.564 |
| C87H157N3O36 | 1 | [M-2H+K]-  | 1857.01230 | 1820.05469 | 4.852 |
| C87H157N3O37 | 3 | [M-2H+Na]- | 1857.02840 | 1836.04960 | 2.227 |
| C86H155N3O37 | 1 | [M-2H+K]-  | 1858.98190 | 1822.03395 | 0.352 |
| C87H152N4O38 | 2 | [M-H]-     | 1860.00290 | 1861.00847 | 0.915 |
| C89H160N4O36 | 2 | [M-H]-     | 1860.07540 | 1861.08124 | 0.770 |
| C84H151N4O43 | 2 | [M-H]-     | 1860.95600 | 1861.96600 | 1.465 |
| C82H144N4O41 | 2 | [M-2H+Na]- | 1861.90930 | 1840.93061 | 2.163 |
| C88H157N3O38 | 1 | [M-H]-     | 1863.04010 | 1864.04452 | 1.530 |
| C88H156N2O39 | 6 | [M-H]-     | 1864.01460 | 1865.02854 | 3.576 |
| C85H150N4O40 | 1 | [M-H]-     | 1865.97890 | 1866.98265 | 1.887 |
| C87H152N4O37 | 2 | [M-2H+Na]- | 1865.99620 | 1845.01355 | 4.280 |
| C87H156N4O36 | 1 | [M-2H+K]-  | 1869.99780 | 1833.04994 | 0.395 |
| C88H159N3O37 | 3 | [M-2H+Na]- | 1871.03300 | 1850.06525 | 3.695 |
| C86H154N4O38 | 2 | [M-2H+Na]- | 1871.99580 | 1851.02412 | 1.591 |
| C89H156N4O37 | 4 | [M-H]-     | 1872.04270 | 1873.04485 | 2.733 |
| C84H148N4O39 | 1 | [M-2H+K]-  | 1873.91990 | 1836.97208 | 0.418 |
| C84H150N2O43 | 1 | [M-H]-     | 1873.95980 | 1874.96125 | 3.108 |
| C86H155N3O38 | 1 | [M-2H+K]-  | 1874.98280 | 1838.02887 | 2.843 |
| C86H154N2O39 | 1 | [M-2H+K]-  | 1875.96700 | 1839.01289 | 2.940 |
| C86H150N4O40 | 2 | [M-H]-     | 1877.96720 | 1878.98265 | 4.355 |
| C86H152N4O40 | 4 | [M-H]-     | 1879.98620 | 1880.99830 | 2.568 |
| C85H150N4O41 | 2 | [M-H]-     | 1881.97800 | 1882.97756 | 4.095 |
| C86H153N3O41 | 2 | [M-H]-     | 1882.98930 | 1883.99796 | 0.740 |
| C89H156N4O38 | 3 | [M-H]-     | 1888.02890 | 1889.03977 | 1.906 |
| C86H153N3O39 | 1 | [M-2H+K]-  | 1888.94780 | 1852.00813 | 4.730 |
| C86H155N4O43 | 2 | [M-H]-     | 1888.98750 | 1889.99730 | 1.338 |
| C88H160N2O38 | 3 | [M-2H+K]-  | 1890.00500 | 1853.06492 | 4.508 |
| C85H151N3O40 | 1 | [M-2H+K]-  | 1890.93550 | 1853.98740 | 0.264 |
| C90H163N3O38 | 1 | [M-H]-     | 1893.07610 | 1894.09147 | 4.278 |
| C86H152N4O41 | 1 | [M-H]-     | 1895.98940 | 1896.99321 | 1.823 |
| C89H158N4O36 | 1 | [M-2H+K]-  | 1896.00600 | 1859.06559 | 4.319 |
| C90H161N3O36 | 1 | [M-2H+K]-  | 1897.03760 | 1860.08599 | 1.587 |
| C90H163N3O37 | 2 | [M-2H+Na]- | 1899.06960 | 1878.09655 | 0.850 |
| C88H157N3O39 | 2 | [M-2H+Na]- | 1901.02020 | 1880.03943 | 3.212 |
| C86H154N2O43 | 2 | [M-H]-     | 1901.98070 | 1902.99255 | 2.405 |
| C90H158N4O38 | 4 | [M-H]-     | 1902.04880 | 1903.05542 | 0.343 |
| C90H159N3O39 | 2 | [M-H]-     | 1905.05440 | 1906.05508 | 3.457 |
| C90H161N3O39 | 4 | [M-H]-     | 1907.06870 | 1908.07073 | 2.746 |
| C87H154N4O41 | 2 | [M-H]-     | 1909.99780 | 1911.00886 | 1.986 |
| C88H157N3O41 | 1 | [M-H]-     | 1911.02720 | 1912.02926 | 2.724 |
| C88H156N4O38 | 1 | [M-2H+K]-  | 1913.98370 | 1877.03977 | 2.439 |
| C91H158N4O38 | 1 | [M-H]-     | 1914.04320 | 1915.05542 | 2.585 |



|              |   |            |            |            |       |
|--------------|---|------------|------------|------------|-------|
| C87H154N4O40 | 2 | [M-2H+Na]- | 1915.98770 | 1895.01395 | 0.474 |
| C91H160N4O38 | 1 | [M-H]-     | 1916.05690 | 1917.07107 | 3.600 |
| C90H160N4O39 | 2 | [M-H]-     | 1920.05940 | 1921.06598 | 0.358 |
| C86H153N3O42 | 3 | [M-2H+Na]- | 1920.97070 | 1899.99288 | 1.646 |
| C88H156N4O41 | 2 | [M-H]-     | 1924.02520 | 1925.02451 | 4.136 |
| C87H154N4O42 | 1 | [M-H]-     | 1926.00080 | 1927.00378 | 2.228 |
| C88H154N4O40 | 1 | [M-2H+Na]- | 1927.98790 | 1907.01395 | 0.367 |
| C90H161N3O38 | 1 | [M-2H+K]-  | 1929.02860 | 1892.07582 | 2.167 |
| C88H156N4O39 | 1 | [M-2H+K]-  | 1929.99160 | 1893.03468 | 4.309 |
| C88H156N4O40 | 1 | [M-2H+Na]- | 1929.99690 | 1909.02960 | 3.812 |
| C91H161N3O40 | 4 | [M-H]-     | 1935.05420 | 1936.06565 | 2.160 |
| C85H150N4O42 | 1 | [M-2H+K]-  | 1935.91160 | 1898.97248 | 4.896 |
| C90H160N4O40 | 1 | [M-H]-     | 1936.06120 | 1937.06090 | 3.911 |
| C87H151N5O42 | 1 | [M-H]-     | 1936.97730 | 1937.98338 | 0.616 |
| C88H156N4O42 | 1 | [M-H]-     | 1940.00870 | 1941.01943 | 1.782 |
| C90H160N4O38 | 1 | [M-2H+K]-  | 1942.01650 | 1905.07107 | 1.631 |
| C90H161N4O43 | 2 | [M-H]-     | 1943.03910 | 1944.04425 | 1.093 |
| C89H158N4O40 | 2 | [M-2H+Na]- | 1944.01880 | 1923.04525 | 0.570 |
| C89H159N3O40 | 1 | [M-2H+K]-  | 1946.99990 | 1910.05000 | 0.668 |
| C90H158N4O41 | 3 | [M-H]-     | 1950.02710 | 1951.04016 | 2.971 |
| C91H162N4O40 | 1 | [M-H]-     | 1950.06540 | 1951.07655 | 1.989 |
| C89H157N5O41 | 2 | [M-H]-     | 1951.03700 | 1952.03541 | 4.541 |
| C90H160N4O41 | 2 | [M-H]-     | 1952.04070 | 1953.05581 | 4.018 |
| C89H158N4O41 | 1 | [M-2H+Na]- | 1960.00570 | 1939.04016 | 4.655 |
| C92H160N4O40 | 1 | [M-H]-     | 1960.05440 | 1961.06090 | 0.394 |
| C90H163N4O43 | 2 | [M-2H+Na]- | 1967.02550 | 1946.05990 | 4.604 |
| C88H158N2O43 | 1 | [M-2H+K]-  | 1967.97750 | 1931.02385 | 2.569 |
| C92H162N4O39 | 1 | [M-2H+Na]- | 1968.06120 | 1947.08163 | 2.493 |
| C88H154N4O44 | 1 | [M-H]-     | 1969.99500 | 1970.99361 | 4.397 |
| C88H154N4O43 | 2 | [M-2H+Na]- | 1975.96830 | 1954.99869 | 2.557 |
| C90H161N3O41 | 1 | [M-2H+K]-  | 1977.00890 | 1940.06056 | 0.134 |
| C93H166N4O40 | 1 | [M-H]-     | 1978.10580 | 1979.10785 | 2.640 |
| C91H162N4O42 | 1 | [M-H]-     | 1982.05910 | 1983.06638 | 0.004 |
| C92H164N2O43 | 1 | [M-H]-     | 1984.06340 | 1985.07080 | 0.064 |
| C93H167N3O40 | 1 | [M-2H+Na]- | 1987.08530 | 1966.11260 | 0.986 |

Supplemental Table 3:  
DPB636 - total lipids detected

| Chemical Formula | No of Batches detected in (of 6) | Ion Detected | Meas mass | Exact Mass | Error (ppm) |
|------------------|----------------------------------|--------------|-----------|------------|-------------|
| C8H6O2           | 4                                | [M+K]+       | 173.00000 | 134.03680  | 0.289       |
| C6H10O5          | 1                                | [M+Na]+      | 185.04170 | 162.05283  | 1.870       |
| C10H18O4         | 1                                | [M-H]-       | 201.11270 | 202.12051  | 2.685       |
| C12H18O3         | 1                                | [M-H]-       | 209.11830 | 210.12560  | 0.120       |
| C13H22O2         | 2                                | [M-H]-       | 209.15470 | 210.16198  | 0.048       |
| C9H16O4          | 1                                | [M+Na]+      | 211.09430 | 188.10486  | 1.037       |
| C12H20O3         | 2                                | [M-H]-       | 211.13410 | 212.14125  | 0.592       |
| C13H24O2         | 2                                | [M-H]-       | 211.17040 | 212.17763  | 0.189       |
| C14H28O          | 2                                | [M-H]-       | 211.20680 | 212.21402  | 0.260       |
| C12H22O3         | 2                                | [M-H]-       | 213.14970 | 214.15690  | 0.352       |
| C13H26O2         | 2                                | [M-H]-       | 213.18610 | 214.19328  | 0.422       |
| C11H20O4         | 2                                | [M-H]-       | 215.12910 | 216.13616  | 0.976       |
| C12H20F2O        | 1                                | [M+H]+       | 219.15530 | 218.14822  | 0.876       |
| C12H14O4         | 1                                | [M-H]-       | 221.08210 | 222.08921  | 0.724       |
| C13H18O3         | 2                                | [M-H]-       | 221.11840 | 222.12560  | 0.339       |
| C14H22O2         | 2                                | [M-H]-       | 221.15480 | 222.16198  | 0.407       |
| C13H20O3         | 2                                | [M-H]-       | 223.13420 | 224.14125  | 1.008       |
| C14H24O2         | 1                                | [M-H]-       | 223.17050 | 224.17763  | 0.627       |
| C12H18O4         | 2                                | [M-H]-       | 225.11240 | 226.12051  | 3.731       |
| C12H18O4         | 2                                | [M-H]-       | 225.11350 | 226.12051  | 1.155       |
| C14H26O2         | 2                                | [M-H]-       | 225.18520 | 226.19328  | 3.597       |
| C14H26O2         | 2                                | [M-H]-       | 225.18620 | 226.19328  | 0.844       |
| C15H30O          | 2                                | [M-H]-       | 225.22160 | 226.22967  | 3.534       |
| C15H30O          | 2                                | [M-H]-       | 225.22260 | 226.22967  | 0.906       |
| C11H16O5         | 2                                | [M-H]-       | 227.09270 | 228.09978  | 0.859       |
| C12H20O4         | 2                                | [M-H]-       | 227.12900 | 228.13616  | 0.484       |
| C13H24O3         | 3                                | [M-H]-       | 227.16550 | 228.17255  | 0.990       |
| C14H28O2         | 2                                | [M-H]-       | 227.20180 | 228.20893  | 0.616       |
| C15H18O2         | 1                                | [M-H]-       | 229.12360 | 230.13068  | 0.829       |
| C12H22O4         | 2                                | [M-H]-       | 229.14460 | 230.15181  | 0.262       |
| C10H10O4         | 5                                | [M+K]+       | 233.02050 | 194.05790  | 2.360       |
| C12H18O3         | 1                                | [M+Na]+      | 233.11500 | 210.12560  | 0.789       |
| C14H18O3         | 2                                | [M-H]-       | 233.11850 | 234.12560  | 0.751       |
| C15H22O2         | 1                                | [M-H]-       | 233.15480 | 234.16198  | 0.386       |
| C15H24O2         | 2                                | [M-H]-       | 235.17040 | 236.17763  | 0.170       |
| C12H25NO         | 1                                | [M-2H+K]-    | 236.14200 | 199.19361  | 0.906       |
| C14H22O3         | 4                                | [M-H]-       | 237.14880 | 238.15690  | 3.479       |
| C14H22O3         | 4                                | [M-H]-       | 237.14980 | 238.15690  | 0.738       |
| C15H26O2         | 2                                | [M-H]-       | 237.18610 | 238.19328  | 0.379       |
| C16H28O          | 1                                | [M+H]+       | 237.22120 | 236.21402  | 0.358       |
| C12H25NO2        | 1                                | [M+Na]+      | 238.17690 | 215.18853  | 3.569       |
| C12H16O5         | 1                                | [M-H]-       | 239.09260 | 240.09978  | 0.397       |
| C14H24O3         | 2                                | [M-H]-       | 239.16540 | 240.17255  | 0.523       |
| C15H26O2         | 1                                | [M+H]+       | 239.20100 | 238.19328  | 1.881       |
| C15H28O2         | 2                                | [M-H]-       | 239.20180 | 240.20893  | 0.585       |
| C16H32O          | 2                                | [M-H]-       | 239.23820 | 240.24532  | 0.644       |

|           |   |           |           |           |       |
|-----------|---|-----------|-----------|-----------|-------|
| C16H18O2  | 2 | [M-H]-    | 241.12360 | 242.13068 | 0.788 |
| C14H26O3  | 2 | [M-H]-    | 241.18110 | 242.18820 | 0.726 |
| C15H30O2  | 2 | [M-H]-    | 241.21750 | 242.22458 | 0.784 |
| C16H20O2  | 2 | [M-H]-    | 243.13910 | 244.14633 | 0.165 |
| C13H24O4  | 2 | [M-H]-    | 243.16030 | 244.16746 | 0.452 |
| C17H24O   | 1 | [M-H]-    | 243.17570 | 244.18272 | 1.049 |
| C14H28O3  | 1 | [M-H]-    | 243.19670 | 244.20385 | 0.510 |
| C15H18O3  | 2 | [M-H]-    | 245.11840 | 246.12560 | 0.306 |
| C16H22O2  | 1 | [M-H]-    | 245.15480 | 246.16198 | 0.367 |
| C15H20O3  | 2 | [M-H]-    | 247.13420 | 248.14125 | 0.910 |
| C14H24O2  | 1 | [M+Na]+   | 247.16610 | 224.17760 | 2.917 |
| C16H24O2  | 1 | [M-H]-    | 247.17040 | 248.17763 | 0.162 |
| C15H28O   | 1 | [M+Na]+   | 247.20330 | 224.21402 | 0.259 |
| C17H28O   | 2 | [M-H]-    | 247.20690 | 248.21402 | 0.627 |
| C15H22O3  | 2 | [M-H]-    | 249.14980 | 250.15690 | 0.702 |
| C16H26O2  | 2 | [M-H]-    | 249.18620 | 250.19328 | 0.762 |
| C17H30O   | 1 | [M-H]-    | 249.22270 | 250.22967 | 1.220 |
| C12H20O4  | 1 | [M+Na]+   | 251.12420 | 228.13616 | 4.703 |
| C13H24O2  | 1 | [M+K]+    | 251.14100 | 212.17763 | 0.876 |
| C15H24O3  | 2 | [M-H]-    | 251.16540 | 252.17255 | 0.498 |
| C16H28O2  | 2 | [M-H]-    | 251.20180 | 252.20893 | 0.557 |
| C17H32O   | 1 | [M-H]-    | 251.23820 | 252.24532 | 0.613 |
| C13H18O5  | 2 | [M-H]-    | 253.10830 | 254.11543 | 0.573 |
| C16H30O2  | 3 | [M-H]-    | 253.21750 | 254.22458 | 0.746 |
| C17H34O   | 2 | [M-H]-    | 253.25380 | 254.26097 | 0.411 |
| C15H28O3  | 2 | [M-H]-    | 255.19680 | 256.20385 | 0.878 |
| C16H32O2  | 2 | [M-H]-    | 255.23310 | 256.24023 | 0.545 |
| C17H22O2  | 1 | [M-H]-    | 257.15490 | 258.16198 | 0.739 |
| C14H26O4  | 2 | [M-H]-    | 257.17600 | 258.18311 | 0.622 |
| C15H30O3  | 1 | [M-H]-    | 257.21240 | 258.21950 | 0.676 |
| C13H25NO4 | 1 | [M-H]-    | 258.17130 | 259.17836 | 0.817 |
| C15H16O4  | 1 | [M-H]-    | 259.09780 | 260.10486 | 0.811 |
| C17H24O2  | 2 | [M-H]-    | 259.17060 | 260.17763 | 0.926 |
| C18H28O   | 4 | [M-H]-    | 259.20700 | 260.21402 | 0.984 |
| C15H18O4  | 2 | [M-H]-    | 261.11340 | 262.12051 | 0.613 |
| C16H22O3  | 2 | [M-H]-    | 261.14980 | 262.15690 | 0.670 |
| C17H26O2  | 2 | [M-H]-    | 261.18630 | 262.19328 | 1.110 |
| C18H30O   | 2 | [M-H]-    | 261.22260 | 262.22967 | 0.781 |
| C15H20O4  | 2 | [M-H]-    | 263.12910 | 264.13616 | 0.798 |
| C17H28O2  | 2 | [M-H]-    | 263.20190 | 264.20893 | 0.912 |
| C13H24O3  | 3 | [M-2H+K]- | 265.12240 | 228.17255 | 4.734 |
| C18H18O2  | 2 | [M-H]-    | 265.12240 | 266.13068 | 3.810 |
| C18H18O2  | 2 | [M-H]-    | 265.12360 | 266.13068 | 0.717 |
| C15H22O4  | 1 | [M-H]-    | 265.14470 | 266.15181 | 0.603 |
| C16H26O3  | 4 | [M-H]-    | 265.18120 | 266.18820 | 1.037 |
| C17H30O2  | 2 | [M-H]-    | 265.21750 | 266.22458 | 0.713 |
| C13H26O3  | 1 | [M-2H+K]- | 267.13810 | 230.18820 | 4.885 |
| C18H20O2  | 4 | [M-H]-    | 267.13930 | 268.14633 | 0.898 |
| C14H30O2  | 1 | [M-2H+K]- | 267.17440 | 230.22458 | 4.563 |

|            |   |         |           |           |       |
|------------|---|---------|-----------|-----------|-------|
| C16H28O3   | 1 | [M-H]-  | 267.19680 | 268.20385 | 0.838 |
| C17H32O2   | 1 | [M-H]-  | 267.23310 | 268.24023 | 0.520 |
| C5H12O7P2  | 1 | [M+Na]+ | 268.99510 | 246.00583 | 0.182 |
| C18H22O2   | 1 | [M-H]-  | 269.15490 | 270.16198 | 0.706 |
| C16H30O3   | 2 | [M-H]-  | 269.21240 | 270.21950 | 0.646 |
| C17H34O2   | 2 | [M-H]-  | 269.24870 | 270.25588 | 0.331 |
| C18H24O2   | 4 | [M-H]-  | 271.17050 | 272.17763 | 0.516 |
| C15H28O4   | 2 | [M-H]-  | 271.19160 | 272.19876 | 0.402 |
| C16H29FO2  | 2 | [M-H]-  | 271.20680 | 272.21516 | 4.015 |
| C19H28O    | 1 | [M-H]-  | 271.20680 | 272.21402 | 0.203 |
| C16H32O3   | 1 | [M-H]-  | 271.22800 | 272.23515 | 0.457 |
| C12H23ClO2 | 1 | [M+K]+  | 273.10090 | 234.13866 | 3.325 |
| C17H22O3   | 1 | [M-H]-  | 273.14980 | 274.15690 | 0.641 |
| C18H26O2   | 2 | [M-H]-  | 273.18610 | 274.19328 | 0.329 |
| C17H24O3   | 1 | [M-H]-  | 275.16530 | 276.17255 | 0.091 |
| C18H28O2   | 4 | [M-H]-  | 275.20180 | 276.20893 | 0.509 |
| C16H22O4   | 1 | [M-H]-  | 277.14470 | 278.15181 | 0.577 |
| C17H26O3   | 1 | [M-H]-  | 277.18100 | 278.18820 | 0.271 |
| C18H30O2   | 2 | [M-H]-  | 277.21740 | 278.22458 | 0.321 |
| C18H16O3   | 1 | [M-H]-  | 279.10280 | 280.10995 | 0.448 |
| C15H20O5   | 1 | [M-H]-  | 279.12390 | 280.13108 | 0.340 |
| C17H28O3   | 1 | [M-H]-  | 279.19670 | 280.20385 | 0.444 |
| C18H32O2   | 2 | [M-H]-  | 279.23320 | 280.24023 | 0.856 |
| C18H33NO   | 1 | [M+H]+  | 280.26420 | 279.25621 | 2.555 |
| C15H22O5   | 1 | [M-H]-  | 281.13960 | 282.14673 | 0.516 |
| C17H30O3   | 2 | [M-H]-  | 281.21230 | 282.21950 | 0.263 |
| C18H34O2   | 1 | [M-H]-  | 281.24860 | 282.25588 | 0.039 |
| C19H38O    | 2 | [M-H]-  | 281.28510 | 282.29227 | 0.370 |
| C18H35NO   | 2 | [M+H]+  | 282.27950 | 281.27186 | 1.297 |
| C18H20O3   | 1 | [M-H]-  | 283.13410 | 284.14125 | 0.441 |
| C20H26O    | 1 | [M+H]+  | 283.20500 | 282.19837 | 2.242 |
| C17H32O3   | 1 | [M-H]-  | 283.22800 | 284.23515 | 0.438 |
| C18H34O2   | 1 | [M+H]+  | 283.26360 | 282.25588 | 1.585 |
| C18H36O2   | 1 | [M-H]-  | 283.26430 | 284.27153 | 0.138 |
| C16H14O5   | 1 | [M-H]-  | 285.07710 | 286.08413 | 0.859 |
| C18H22O3   | 1 | [M-H]-  | 285.14960 | 286.15690 | 0.088 |
| C19H26O2   | 2 | [M-H]-  | 285.18600 | 286.19328 | 0.035 |
| C16H30O4   | 1 | [M-H]-  | 285.20710 | 286.21441 | 0.144 |
| C17H34O3   | 1 | [M-H]-  | 285.24360 | 286.25080 | 0.259 |
| C18H24O3   | 2 | [M-H]-  | 287.16530 | 288.17255 | 0.087 |
| C19H28O2   | 1 | [M-H]-  | 287.20160 | 288.20893 | 0.209 |
| C16H32O4   | 1 | [M-H]-  | 287.22280 | 288.23006 | 0.031 |
| C20H32O    | 2 | [M-H]-  | 287.23790 | 288.24532 | 0.508 |
| C17H22O4   | 1 | [M-H]-  | 289.14450 | 290.15181 | 0.138 |
| C18H26O3   | 1 | [M-H]-  | 289.18090 | 290.18820 | 0.086 |
| C19H30O2   | 2 | [M-H]-  | 289.21730 | 290.22458 | 0.038 |
| C18H34O    | 1 | [M+Na]+ | 289.24950 | 266.26097 | 2.375 |
| C18H28O3   | 1 | [M-H]-  | 291.19660 | 292.20385 | 0.082 |
| C19H32O2   | 2 | [M-H]-  | 291.23280 | 292.24023 | 0.553 |

|           |   |            |           |           |       |
|-----------|---|------------|-----------|-----------|-------|
| C18H3003  | 1 | [M-H]-     | 293.21220 | 294.21950 | 0.089 |
| C19H34O2  | 1 | [M-H]-     | 293.24870 | 294.25588 | 0.303 |
| C19H31N   | 2 | [M-2H+Na]- | 294.22010 | 273.24565 | 1.309 |
| C18H33NO2 | 2 | [M-H]-     | 294.24390 | 295.25113 | 0.139 |
| C15H20O6  | 1 | [M-H]-     | 295.11880 | 296.12599 | 0.271 |
| C16H24O5  | 1 | [M-H]-     | 295.15510 | 296.16238 | 0.017 |
| C20H24O2  | 3 | [M-H]-     | 295.17040 | 296.17763 | 0.136 |
| C17H28O4  | 1 | [M-H]-     | 295.19150 | 296.19876 | 0.030 |
| C21H28O   | 1 | [M-H]-     | 295.20700 | 296.21402 | 0.864 |
| C18H32O3  | 1 | [M-H]-     | 295.22770 | 296.23515 | 0.596 |
| C19H36O2  | 2 | [M-H]-     | 295.26410 | 296.27153 | 0.545 |
| C18H29N   | 1 | [M-2H+K]-  | 296.17810 | 259.23000 | 1.685 |
| C16H26O5  | 1 | [M-H]-     | 297.17060 | 298.17803 | 0.522 |
| C20H26O2  | 2 | [M-H]-     | 297.18590 | 298.19328 | 0.370 |
| C17H30O4  | 1 | [M-H]-     | 297.20700 | 298.21441 | 0.474 |
| C18H34O3  | 1 | [M-H]-     | 297.24340 | 298.25080 | 0.424 |
| C19H38O2  | 2 | [M-H]-     | 297.27990 | 298.28718 | 0.037 |
| C18H31NO  | 6 | [M-2H+Na]- | 298.21440 | 277.24056 | 0.771 |
| C19H24O3  | 1 | [M-H]-     | 299.16540 | 300.17255 | 0.418 |
| C16H28O5  | 1 | [M-H]-     | 299.18640 | 300.19368 | 0.020 |
| C20H28O2  | 3 | [M-H]-     | 299.20160 | 300.20893 | 0.201 |
| C17H32O4  | 1 | [M-H]-     | 299.22270 | 300.23006 | 0.304 |
| C18H33FO2 | 2 | [M-H]-     | 299.23780 | 300.24646 | 4.642 |
| C21H32O   | 1 | [M-H]-     | 299.23780 | 300.24532 | 0.822 |
| C18H36O3  | 1 | [M-H]-     | 299.25890 | 300.26645 | 0.922 |
| C20H42O   | 1 | [M+H]+     | 299.33060 | 298.32357 | 0.788 |
| C18H33NO  | 2 | [M-2H+Na]- | 300.23060 | 279.25621 | 1.066 |
| C18H22O4  | 1 | [M-H]-     | 301.14450 | 302.15181 | 0.133 |
| C19H26O3  | 2 | [M-H]-     | 301.18090 | 302.18820 | 0.083 |
| C16H30O5  | 1 | [M-H]-     | 301.20210 | 302.20933 | 0.146 |
| C20H30O2  | 3 | [M-H]-     | 301.21720 | 302.22458 | 0.369 |
| C17H32O4  | 1 | [M+H]+     | 301.23750 | 300.23006 | 0.561 |
| C18H35FO2 | 2 | [M-H]-     | 301.25360 | 302.26211 | 4.113 |
| C21H34O   | 1 | [M-H]-     | 301.25360 | 302.26097 | 0.319 |
| C16H27NO2 | 1 | [M-2H+K]-  | 302.15210 | 265.20418 | 2.247 |
| C17H30O3  | 2 | [M-2H+Na]- | 303.19260 | 282.21950 | 3.173 |
| C19H28O3  | 1 | [M-H]-     | 303.19650 | 304.20385 | 0.251 |
| C18H32O2  | 1 | [M+Na]+    | 303.23070 | 280.24023 | 4.116 |
| C20H30O2  | 1 | [M+H]+     | 303.23070 | 302.22458 | 3.796 |
| C20H32O2  | 3 | [M-H]-     | 303.23280 | 304.24023 | 0.531 |
| C18H35FO2 | 1 | [M+H]+     | 303.27060 | 302.26211 | 4.026 |
| C15H22O5  | 2 | [M+Na]+    | 305.13620 | 282.14673 | 0.832 |
| C17H22O5  | 1 | [M-H]-     | 305.13940 | 306.14673 | 0.180 |
| C19H30O3  | 1 | [M-H]-     | 305.21210 | 306.21950 | 0.413 |
| C20H34O2  | 2 | [M-H]-     | 305.24850 | 306.25588 | 0.364 |
| C20H42    | 1 | [M+Na]+    | 305.31660 | 282.32865 | 4.166 |
| C16H29O5  | 1 | [M-2H+K]-  | 306.14270 | 269.19390 | 0.653 |
| C16H29O2S | 1 | [M-2H+Na]- | 306.16250 | 285.18850 | 0.216 |
| C19H32O3  | 1 | [M-H]-     | 307.22770 | 308.23515 | 0.573 |

|            |   |            |           |           |       |
|------------|---|------------|-----------|-----------|-------|
| C20H36O2   | 2 | [M-H]-     | 307.26420 | 308.27153 | 0.199 |
| C16H31OS   | 1 | [M-2H+K]-  | 308.15850 | 271.20950 | 1.298 |
| C16H33NO2  | 2 | [M-2H+K]-  | 308.19930 | 271.25113 | 1.392 |
| C17H26O5   | 2 | [M-H]-     | 309.17090 | 310.17803 | 0.469 |
| C20H32     | 1 | [M-2H+K]-  | 309.19890 | 272.25040 | 0.327 |
| C18H30O4   | 1 | [M-H]-     | 309.20720 | 310.21441 | 0.191 |
| C22H30O    | 2 | [M-H]-     | 309.22220 | 310.22967 | 0.634 |
| C20H38O2   | 2 | [M-H]-     | 309.27970 | 310.28718 | 0.682 |
| C19H31N    | 2 | [M-2H+K]-  | 310.19380 | 273.24565 | 1.447 |
| C16H35NO2  | 1 | [M-2H+K]-  | 310.21490 | 273.26678 | 1.544 |
| C21H28O2   | 1 | [M-H]-     | 311.20160 | 312.20893 | 0.193 |
| C16H32O4   | 1 | [M+Na]+    | 311.21820 | 288.23006 | 3.477 |
| C18H32O4   | 1 | [M-H]-     | 311.22270 | 312.23006 | 0.292 |
| C19H36O3   | 1 | [M-H]-     | 311.25910 | 312.26645 | 0.244 |
| C20H38O2   | 1 | [M+H]+     | 311.29470 | 310.28718 | 0.800 |
| C20H40O2   | 2 | [M-H]-     | 311.29550 | 312.30283 | 0.196 |
| C19H37NO2  | 1 | [M+H]+     | 312.28840 | 311.28243 | 4.160 |
| C19H22O4   | 1 | [M-H]-     | 313.14450 | 314.15181 | 0.128 |
| C16H33ClO  | 2 | [M-2H+K]-  | 313.17040 | 276.22199 | 0.619 |
| C16H33ClO  | 2 | [M-2H+K]-  | 313.17140 | 276.22199 | 2.574 |
| C20H26O3   | 1 | [M-H]-     | 313.18070 | 314.18820 | 0.718 |
| C19H32O    | 4 | [M-2H+K]-  | 313.19380 | 276.24532 | 0.370 |
| C19H30O    | 1 | [M+K]+     | 313.19380 | 274.22967 | 3.142 |
| C16H31FO2  | 1 | [M+K]+     | 313.19380 | 274.23081 | 0.508 |
| C19H32O    | 4 | [M-2H+K]-  | 313.19460 | 276.24532 | 2.184 |
| C16H30F2O2 | 3 | [M-2H+Na]- | 313.19460 | 292.22139 | 2.727 |
| C16H30F2O2 | 3 | [M-2H+Na]- | 313.19560 | 292.22139 | 0.466 |
| C21H30O2   | 2 | [M-H]-     | 313.21720 | 314.22458 | 0.354 |
| C20H36     | 1 | [M-2H+K]-  | 313.22970 | 276.28170 | 1.919 |
| C18H34O4   | 1 | [M-H]-     | 313.23840 | 314.24571 | 0.131 |
| C19H36O3   | 4 | [M+H]+     | 313.27410 | 312.26645 | 1.226 |
| C19H38O3   | 1 | [M-H]-     | 313.27470 | 314.28210 | 0.402 |
| C18H31NO   | 6 | [M-2H+K]-  | 314.18870 | 277.24056 | 1.477 |
| C12H23BrO2 | 1 | [M-2H+K]-  | 315.03720 | 278.08814 | 1.460 |
| C19H24O4   | 2 | [M-H]-     | 315.16020 | 316.16746 | 0.032 |
| C20H28O3   | 3 | [M-H]-     | 315.19650 | 316.20385 | 0.241 |
| C21H32O2   | 2 | [M-H]-     | 315.23290 | 316.24023 | 0.194 |
| C18H36O4   | 1 | [M-H]-     | 315.25390 | 316.26136 | 0.606 |
| C18H33NO   | 2 | [M-2H+K]-  | 316.20460 | 279.25621 | 0.677 |
| C20H30O3   | 3 | [M-H]-     | 317.21220 | 318.21950 | 0.082 |
| C21H34O2   | 1 | [M-H]-     | 317.24840 | 318.25588 | 0.665 |
| C18H35NO   | 1 | [M-2H+K]-  | 318.22030 | 281.27186 | 0.515 |
| C21H35NO   | 1 | [M+H]+     | 318.27910 | 317.27186 | 0.107 |
| C22H24O2   | 1 | [M-H]-     | 319.17030 | 320.17763 | 0.188 |
| C19H28O4   | 1 | [M-H]-     | 319.19140 | 320.19876 | 0.285 |
| C20H32O3   | 2 | [M-H]-     | 319.22790 | 320.23515 | 0.075 |
| C21H36O2   | 2 | [M-H]-     | 319.26420 | 320.27153 | 0.191 |
| C17H33NO2  | 1 | [M-2H+K]-  | 320.19920 | 283.25113 | 1.652 |
| C20H34O3   | 2 | [M-H]-     | 321.24350 | 322.25080 | 0.081 |

|             |   |            |           |           |       |
|-------------|---|------------|-----------|-----------|-------|
| C21H38O2    | 1 | [M-H]-     | 321.27990 | 322.28718 | 0.034 |
| C17H35NO2   | 2 | [M-2H+K]-  | 322.21500 | 285.26678 | 1.176 |
| C18H39NO    | 1 | [M-2H+K]-  | 322.25160 | 285.30316 | 0.509 |
| C20H37NO2   | 2 | [M-H]-     | 322.27530 | 323.28243 | 0.438 |
| C18H28O5    | 1 | [M-H]-     | 323.18640 | 324.19368 | 0.019 |
| C22H28O2    | 1 | [M-H]-     | 323.20170 | 324.20893 | 0.124 |
| C19H32O4    | 1 | [M-H]-     | 323.22280 | 324.23006 | 0.028 |
| C23H32O     | 1 | [M-H]-     | 323.23800 | 324.24532 | 0.142 |
| C20H36O3    | 1 | [M-H]-     | 323.25920 | 324.26645 | 0.074 |
| C21H40O2    | 2 | [M-H]-     | 323.29560 | 324.30283 | 0.121 |
| C16H33NO3   | 1 | [M-2H+K]-  | 324.19430 | 287.24604 | 1.061 |
| C18H39NO    | 1 | [M+K]+     | 324.26640 | 285.30316 | 0.265 |
| C18H30O5    | 1 | [M-H]-     | 325.20210 | 326.20933 | 0.135 |
| C19H32O4    | 1 | [M+H]+     | 325.23780 | 324.23006 | 1.442 |
| C19H34O4    | 1 | [M-H]-     | 325.23860 | 326.24571 | 0.489 |
| C20H38O3    | 2 | [M-H]-     | 325.27490 | 326.28210 | 0.227 |
| C21H42O2    | 2 | [M-H]-     | 325.31120 | 326.31848 | 0.034 |
| C18H31NO4   | 2 | [M+H]+     | 326.23120 | 325.22531 | 4.227 |
| C20H35NO    | 2 | [M-2H+Na]- | 326.24640 | 305.27186 | 1.441 |
| C20H24O4    | 1 | [M-H]-     | 327.16040 | 328.16746 | 0.642 |
| C21H28O3    | 1 | [M-H]-     | 327.19670 | 328.20385 | 0.379 |
| C18H32O5    | 1 | [M-H]-     | 327.21780 | 328.22498 | 0.287 |
| C22H32O2    | 2 | [M-H]-     | 327.23310 | 328.24023 | 0.425 |
| C20H40O3    | 2 | [M-H]-     | 327.29040 | 328.29775 | 0.232 |
| C19H33NO2   | 2 | [M-2H+Na]- | 328.22550 | 307.25113 | 0.929 |
| C19H22O5    | 1 | [M-H]-     | 329.13960 | 330.14673 | 0.441 |
| C16H26O7    | 2 | [M-H]-     | 329.16030 | 330.16786 | 0.869 |
| C16H30F2O2  | 3 | [M-2H+K]-  | 329.16920 | 292.22139 | 2.394 |
| C21H30O3    | 2 | [M-H]-     | 329.21240 | 330.21950 | 0.529 |
| C18H34O5    | 1 | [M-H]-     | 329.23350 | 330.24063 | 0.437 |
| C22H34O2    | 3 | [M-H]-     | 329.24870 | 330.25588 | 0.270 |
| C19H24O5    | 1 | [M-H]-     | 331.15510 | 332.16238 | 0.015 |
| C16H28O7    | 1 | [M-H]-     | 331.17570 | 332.18351 | 1.618 |
| C20H28O4    | 2 | [M-H]-     | 331.19150 | 332.19876 | 0.027 |
| C21H32O3    | 2 | [M-H]-     | 331.22800 | 332.23515 | 0.374 |
| C22H36O2    | 1 | [M-H]-     | 331.26450 | 332.27153 | 0.721 |
| C18H33NO2   | 2 | [M-2H+K]-  | 332.19950 | 295.25113 | 0.689 |
| C15H22BrClO | 1 | [M+H]+     | 333.06230 | 332.05425 | 2.333 |
| C18H30O3    | 1 | [M+K]+     | 333.18370 | 294.21950 | 3.163 |
| C20H30O4    | 2 | [M-H]-     | 333.20720 | 334.21441 | 0.177 |
| C19H36O2    | 2 | [M-2H+K]-  | 333.22010 | 296.27153 | 0.093 |
| C21H34O3    | 1 | [M-H]-     | 333.24360 | 334.25080 | 0.222 |
| C22H38O2    | 1 | [M-H]-     | 333.28000 | 334.28718 | 0.267 |
| C11H22NO7P  | 1 | [M+Na]+    | 334.10320 | 311.11339 | 1.757 |
| C16H27NO4   | 1 | [M-2H+K]-  | 334.14230 | 297.19401 | 0.925 |
| C18H35NO2   | 2 | [M-2H+K]-  | 334.21530 | 297.26678 | 0.236 |
| C20H29FO3   | 1 | [M-H]-     | 335.20170 | 336.21007 | 3.294 |
| C18H32O4    | 1 | [M+Na]+    | 335.21920 | 312.23006 | 0.245 |
| C20H32O4    | 2 | [M-H]-     | 335.22280 | 336.23006 | 0.027 |

|            |   |            |           |           |       |
|------------|---|------------|-----------|-----------|-------|
| C22H40O2   | 1 | [M-H]-     | 335.29560 | 336.30283 | 0.116 |
| C12H28NO6P | 1 | [M+Na]+    | 336.15380 | 313.16543 | 2.523 |
| C18H37NO2  | 2 | [M-2H+K]-  | 336.23050 | 299.28243 | 1.573 |
| C17H30O4   | 1 | [M+K]+     | 337.17640 | 298.21441 | 3.443 |
| C20H26O3   | 1 | [M+Na]+    | 337.17640 | 314.18820 | 3.013 |
| C19H30O5   | 1 | [M-H]-     | 337.20210 | 338.20933 | 0.130 |
| C18H36O2S  | 1 | [M-2H+Na]- | 337.21730 | 316.24360 | 1.094 |
| C20H34O4   | 1 | [M-H]-     | 337.23850 | 338.24571 | 0.175 |
| C22H42O2   | 1 | [M-H]-     | 337.31140 | 338.31848 | 0.560 |
| C17H33NO4  | 1 | [M+Na]+    | 338.22930 | 315.24096 | 2.602 |
| C21H35NO   | 2 | [M-2H+Na]- | 338.24650 | 317.27186 | 1.685 |
| C18H39NO2  | 1 | [M-2H+K]-  | 338.24650 | 301.29808 | 0.529 |
| C18H28O6   | 1 | [M-H]-     | 339.18150 | 340.18859 | 0.528 |
| C21H32O2   | 1 | [M+Na]+    | 339.23050 | 316.24023 | 3.089 |
| C18H36O3   | 1 | [M+K]+     | 339.23050 | 300.26645 | 2.665 |
| C18H36O4   | 1 | [M+Na]+    | 339.24990 | 316.26136 | 2.010 |
| C20H36O4   | 1 | [M-H]-     | 339.25410 | 340.26136 | 0.027 |
| C21H40O3   | 1 | [M-H]-     | 339.29050 | 340.29775 | 0.071 |
| C22H44O2   | 1 | [M-H]-     | 339.32690 | 340.33413 | 0.115 |
| C20H33NO   | 1 | [M-2H+K]-  | 340.20440 | 303.25621 | 1.217 |
| C18H30O6   | 1 | [M-H]-     | 341.19700 | 342.20424 | 0.085 |
| C22H30O3   | 2 | [M-H]-     | 341.21220 | 342.21950 | 0.076 |
| C19H34O5   | 1 | [M-H]-     | 341.23330 | 342.24063 | 0.164 |
| C23H34O2   | 1 | [M-H]-     | 341.24860 | 342.25588 | 0.032 |
| C20H38O4   | 1 | [M-H]-     | 341.26970 | 342.27701 | 0.120 |
| C21H42O3   | 1 | [M-H]-     | 341.30620 | 342.31340 | 0.217 |
| C20H35NO   | 2 | [M-2H+K]-  | 342.22020 | 305.27186 | 0.771 |
| C19H20O6   | 1 | [M-H]-     | 343.11880 | 344.12599 | 0.233 |
| C21H28O4   | 1 | [M-H]-     | 343.19150 | 344.19876 | 0.026 |
| C22H32O3   | 2 | [M-H]-     | 343.22790 | 344.23515 | 0.070 |
| C19H36O5   | 1 | [M-H]-     | 343.24900 | 344.25628 | 0.017 |
| C23H36O2   | 2 | [M-H]-     | 343.26430 | 344.27153 | 0.114 |
| C20H38O4   | 1 | [M+H]+     | 343.28510 | 342.27701 | 2.386 |
| C18H29NO3  | 1 | [M-2H+K]-  | 344.16280 | 307.21474 | 1.581 |
| C19H33NO2  | 2 | [M-2H+K]-  | 344.19930 | 307.25113 | 1.246 |
| C19H22O6   | 1 | [M-H]-     | 345.13450 | 346.14164 | 0.377 |
| C20H26O5   | 1 | [M-H]-     | 345.17080 | 346.17803 | 0.130 |
| C21H30O4   | 1 | [M-H]-     | 345.20710 | 346.21441 | 0.119 |
| C22H34O3   | 2 | [M-H]-     | 345.24350 | 346.25080 | 0.075 |
| C23H38O2   | 1 | [M-H]-     | 345.28000 | 346.28718 | 0.258 |
| C19H35NO2  | 1 | [M-2H+K]-  | 346.21510 | 309.26678 | 0.806 |
| C22H37NO2  | 2 | [M-H]-     | 346.27530 | 347.28243 | 0.407 |
| C23H39NO   | 1 | [M+H]+     | 346.31080 | 345.30316 | 1.057 |
| C6H14O10P2 | 1 | [M+K]+     | 346.96830 | 308.00623 | 3.098 |
| C19H24O6   | 2 | [M-H]-     | 347.15000 | 348.15729 | 0.058 |
| C20H28O5   | 2 | [M-H]-     | 347.18640 | 348.19368 | 0.017 |
| C24H28O2   | 2 | [M-H]-     | 347.20160 | 348.20893 | 0.173 |
| C21H32O4   | 2 | [M-H]-     | 347.22290 | 348.23006 | 0.314 |
| C23H40O2   | 1 | [M-H]-     | 347.29570 | 348.30283 | 0.400 |



|            |   |            |           |           |       |
|------------|---|------------|-----------|-----------|-------|
| C19H37NO2  | 1 | [M-2H+K]-  | 348.23050 | 311.28243 | 1.519 |
| C22H39NO2  | 2 | [M-H]-     | 348.29090 | 349.29808 | 0.261 |
| C18H21BrO2 | 1 | [M+H]+     | 349.08130 | 348.07249 | 4.412 |
| C19H26O6   | 1 | [M-H]-     | 349.16580 | 350.17294 | 0.372 |
| C20H30O5   | 2 | [M-H]-     | 349.20210 | 350.20933 | 0.126 |
| C21H34O4   | 3 | [M-H]-     | 349.23850 | 350.24571 | 0.169 |
| C22H38O3   | 1 | [M-H]-     | 349.27480 | 350.28210 | 0.074 |
| C23H42O2   | 1 | [M-H]-     | 349.31120 | 350.31848 | 0.031 |
| C25H48     | 1 | [M+H]+     | 349.38130 | 348.37560 | 4.496 |
| C18H35NO3  | 1 | [M-2H+K]-  | 350.20990 | 313.26169 | 1.125 |
| C16H34NO5P | 1 | [M-H]-     | 350.20990 | 351.21746 | 0.834 |
| C19H39NO2  | 1 | [M-2H+K]-  | 350.24630 | 313.29808 | 1.082 |
| C20H43NO   | 1 | [M-2H+K]-  | 350.28260 | 313.33446 | 1.325 |
| C22H41NO2  | 2 | [M-H]-     | 350.30650 | 351.31373 | 0.117 |
| C20H32O5   | 2 | [M-H]-     | 351.21780 | 352.22498 | 0.268 |
| C21H36O4   | 2 | [M-H]-     | 351.25410 | 352.26136 | 0.026 |
| C23H44O2   | 2 | [M-H]-     | 351.32680 | 352.33413 | 0.174 |
| C17H33NO4  | 1 | [M-2H+K]-  | 352.18920 | 315.24096 | 1.019 |
| C16H36NO5P | 1 | [M-H]-     | 352.22590 | 353.23311 | 0.165 |
| C18H37NO3  | 1 | [M-2H+K]-  | 352.22590 | 315.27734 | 0.125 |
| C22H37NO   | 2 | [M-2H+Na]- | 352.26190 | 331.28751 | 0.908 |
| C20H43NO   | 1 | [M+K]+     | 352.29800 | 313.33446 | 1.096 |
| C22H43NO2  | 2 | [M-H]-     | 352.32220 | 353.32938 | 0.258 |
| C19H30O6   | 1 | [M-H]-     | 353.19700 | 354.20424 | 0.082 |
| C23H30O3   | 1 | [M-H]-     | 353.21230 | 354.21950 | 0.210 |
| C20H34O5   | 2 | [M-H]-     | 353.23340 | 354.24063 | 0.125 |
| C24H34O2   | 2 | [M-H]-     | 353.24860 | 354.25588 | 0.031 |
| C21H38O4   | 4 | [M-H]-     | 353.26970 | 354.27701 | 0.116 |
| C25H38O    | 1 | [M-H]-     | 353.28500 | 354.29227 | 0.011 |
| C22H42O3   | 1 | [M-H]-     | 353.30610 | 354.31340 | 0.074 |
| C23H46O2   | 1 | [M-H]-     | 353.34250 | 354.34978 | 0.031 |
| C14H30NO7P | 1 | [M-H]-     | 354.16840 | 355.17599 | 0.909 |
| C21H35NO   | 2 | [M-2H+K]-  | 354.22000 | 317.27186 | 1.310 |
| C18H39NO3  | 1 | [M-2H+K]-  | 354.24130 | 317.29299 | 0.830 |
| C22H43NO2  | 1 | [M+H]+     | 354.33720 | 353.32938 | 1.555 |
| C19H24O4   | 1 | [M+K]+     | 355.13160 | 316.16746 | 2.788 |
| C19H24O5   | 1 | [M+Na]+    | 355.15300 | 332.16238 | 3.953 |
| C19H32O6   | 1 | [M-H]-     | 355.21280 | 356.21989 | 0.504 |
| C23H32O3   | 1 | [M-H]-     | 355.22790 | 356.23515 | 0.068 |
| C20H36O5   | 1 | [M-H]-     | 355.24900 | 356.25628 | 0.017 |
| C24H36O2   | 2 | [M-H]-     | 355.26420 | 356.27153 | 0.172 |
| C21H40O4   | 2 | [M-H]-     | 355.28530 | 356.29266 | 0.256 |
| C25H40O    | 2 | [M-H]-     | 355.30050 | 356.30792 | 0.411 |
| C22H44O3   | 1 | [M-H]-     | 355.32160 | 356.32905 | 0.495 |
| C20H33NO2  | 1 | [M-2H+K]-  | 356.19940 | 319.25113 | 0.924 |
| C18H39NO3  | 4 | [M+K]+     | 356.25740 | 317.29299 | 3.526 |
| C22H45NO2  | 1 | [M+H]+     | 356.35220 | 355.34503 | 0.278 |
| C21H26O5   | 1 | [M-H]-     | 357.17080 | 358.17803 | 0.126 |
| C22H30O4   | 2 | [M-H]-     | 357.20720 | 358.21441 | 0.165 |

|            |   |            |           |           |       |
|------------|---|------------|-----------|-----------|-------|
| C23H34O3   | 1 | [M-H]-     | 357.24370 | 358.25080 | 0.487 |
| C20H38O5   | 1 | [M-H]-     | 357.26500 | 358.27193 | 0.963 |
| C24H38O2   | 3 | [M-H]-     | 357.28010 | 358.28718 | 0.529 |
| C25H42O    | 1 | [M-H]-     | 357.31640 | 358.32357 | 0.291 |
| C22H44O3   | 1 | [M+H]+     | 357.33640 | 356.32905 | 0.235 |
| C20H35NO2  | 1 | [M-2H+K]-  | 358.21500 | 321.26678 | 1.058 |
| C19H20O7   | 1 | [M-H]-     | 359.11380 | 360.12091 | 0.459 |
| C21H28O5   | 1 | [M-H]-     | 359.18640 | 360.19368 | 0.017 |
| C22H32O4   | 1 | [M-H]-     | 359.22270 | 360.23006 | 0.253 |
| C23H36O3   | 1 | [M-H]-     | 359.25900 | 360.26645 | 0.490 |
| C24H40O2   | 3 | [M-H]-     | 359.29550 | 360.30283 | 0.170 |
| C22H29NO2  | 2 | [M-2H+Na]- | 360.19430 | 339.21983 | 1.124 |
| C20H37NO2  | 2 | [M-2H+K]-  | 360.23080 | 323.28243 | 0.636 |
| C24H41NO   | 1 | [M+H]+     | 360.32520 | 359.31881 | 2.453 |
| C19H22O7   | 1 | [M-H]-     | 361.12920 | 362.13656 | 0.235 |
| C20H26O6   | 1 | [M-H]-     | 361.16560 | 362.17294 | 0.194 |
| C21H30O5   | 1 | [M-H]-     | 361.20210 | 362.20933 | 0.122 |
| C20H34O4   | 1 | [M+Na]+    | 361.23320 | 338.24571 | 4.795 |
| C22H34O4   | 1 | [M-H]-     | 361.23840 | 362.24571 | 0.113 |
| C23H38O3   | 1 | [M-H]-     | 361.27480 | 362.28210 | 0.072 |
| C24H42O2   | 2 | [M-H]-     | 361.31120 | 362.31848 | 0.030 |
| C18H31NO4  | 1 | [M-2H+K]-  | 362.17370 | 325.22531 | 0.577 |
| C20H39NO2  | 1 | [M-2H+K]-  | 362.24640 | 325.29808 | 0.770 |
| C20H39NO3  | 4 | [M-2H+Na]- | 362.26710 | 341.29299 | 0.110 |
| C22H35NO3  | 1 | [M+H]+     | 362.26920 | 361.26169 | 0.651 |
| C19H22O7   | 1 | [M+H]+     | 363.14490 | 362.13656 | 2.960 |
| C19H24O7   | 1 | [M-H]-     | 363.14490 | 364.15221 | 0.096 |
| C20H28O6   | 1 | [M-H]-     | 363.18130 | 364.18859 | 0.058 |
| C21H32O5   | 1 | [M-H]-     | 363.21760 | 364.22498 | 0.292 |
| C25H32O2   | 1 | [M-H]-     | 363.23290 | 364.24023 | 0.168 |
| C22H36O4   | 1 | [M-H]-     | 363.25400 | 364.26136 | 0.251 |
| C21H40O2   | 2 | [M+K]+     | 363.26630 | 324.30283 | 0.878 |
| C23H40O3   | 2 | [M-H]-     | 363.29050 | 364.29775 | 0.066 |
| C24H44O2   | 1 | [M-H]-     | 363.32690 | 364.33413 | 0.107 |
| C13H28NO7P | 1 | [M+Na]+    | 364.15090 | 341.16034 | 3.672 |
| C18H33NO4  | 1 | [M-2H+K]-  | 364.18910 | 327.24096 | 1.260 |
| C19H37NO3  | 1 | [M-2H+K]-  | 364.22560 | 327.27734 | 0.944 |
| C17H36NO5P | 1 | [M-H]-     | 364.22560 | 365.23311 | 0.664 |
| C20H41NO2  | 2 | [M-2H+K]-  | 364.26190 | 327.31373 | 1.178 |
| C20H30O6   | 2 | [M-H]-     | 365.19690 | 366.20424 | 0.194 |
| C21H34O5   | 2 | [M-H]-     | 365.23340 | 366.24063 | 0.120 |
| C24H46O2   | 1 | [M-H]-     | 365.34260 | 366.34978 | 0.244 |
| C23H39NO   | 2 | [M-2H+Na]- | 366.27740 | 345.30316 | 0.464 |
| C20H43NO2  | 1 | [M-2H+K]-  | 366.27740 | 329.32938 | 1.581 |
| C22H41NO3  | 2 | [M-H]-     | 366.30120 | 367.30864 | 0.475 |
| C20H32O6   | 2 | [M-H]-     | 367.21260 | 368.21989 | 0.057 |
| C24H32O3   | 2 | [M-H]-     | 367.22790 | 368.23515 | 0.065 |
| C21H36O5   | 2 | [M-H]-     | 367.24910 | 368.25628 | 0.256 |
| C21H34O5   | 2 | [M+H]+     | 367.24930 | 366.24063 | 3.823 |

|             |   |            |           |           |       |
|-------------|---|------------|-----------|-----------|-------|
| C25H36O2    | 2 | [M-H]-     | 367.26440 | 368.27153 | 0.378 |
| C23H44O3    | 1 | [M-H]-     | 367.32190 | 368.32905 | 0.338 |
| C24H48O2    | 1 | [M-H]-     | 367.35820 | 368.36543 | 0.106 |
| C22H37NO    | 2 | [M-2H+K]-  | 368.23580 | 331.28751 | 0.853 |
| C22H43NO3   | 6 | [M-H]-     | 368.31700 | 369.32429 | 0.065 |
| C19H22O5    | 1 | [M+K]+     | 369.10840 | 330.14673 | 3.996 |
| C20H34O6    | 1 | [M-H]-     | 369.22840 | 370.23554 | 0.349 |
| C24H34O3    | 2 | [M-H]-     | 369.24370 | 370.25080 | 0.471 |
| C22H42O4    | 1 | [M-H]-     | 369.30120 | 370.30831 | 0.431 |
| C26H42O     | 1 | [M-H]-     | 369.31790 | 370.32357 | 4.343 |
| C23H46O3    | 1 | [M-H]-     | 369.33760 | 370.34470 | 0.471 |
| C22H36FNO   | 1 | [M-2H+Na]- | 370.25140 | 349.27809 | 2.050 |
| C20H28O4    | 3 | [M+K]+     | 371.16310 | 332.19876 | 3.203 |
| C22H28O5    | 2 | [M-H]-     | 371.18630 | 372.19368 | 0.286 |
| C20H36O6    | 2 | [M-H]-     | 371.24390 | 372.25119 | 0.057 |
| C24H36O3    | 1 | [M-H]-     | 371.25920 | 372.26645 | 0.065 |
| C25H40O2    | 1 | [M-H]-     | 371.29570 | 372.30283 | 0.374 |
| C26H44O     | 1 | [M-H]-     | 371.33180 | 372.33922 | 0.393 |
| C10H11BrCl4 | 1 | [M+Na]+    | 372.87060 | 349.87982 | 4.176 |
| C22H30O5    | 3 | [M-H]-     | 373.20190 | 374.20933 | 0.418 |
| C23H34O4    | 1 | [M-H]-     | 373.23840 | 374.24571 | 0.110 |
| C24H38O3    | 1 | [M-H]-     | 373.27470 | 374.28210 | 0.338 |
| C25H42O2    | 2 | [M-H]-     | 373.31120 | 374.31848 | 0.029 |
| C22H41NO2   | 1 | [M+Na]+    | 374.30300 | 351.31373 | 0.134 |
| C21H28O6    | 1 | [M-H]-     | 375.18140 | 376.18859 | 0.211 |
| C22H32O5    | 2 | [M-H]-     | 375.21770 | 376.22498 | 0.016 |
| C23H36O4    | 1 | [M-H]-     | 375.25410 | 376.26136 | 0.024 |
| C24H40O3    | 1 | [M-H]-     | 375.29040 | 376.29775 | 0.203 |
| C25H44O2    | 1 | [M-H]-     | 375.32680 | 376.33413 | 0.163 |
| C22H29NO2   | 2 | [M-2H+K]-  | 376.16800 | 339.21983 | 1.140 |
| C20H37NO3   | 1 | [M-2H+K]-  | 376.22550 | 339.27734 | 1.180 |
| C20H26O7    | 1 | [M-H]-     | 377.16060 | 378.16786 | 0.037 |
| C21H30O6    | 1 | [M-H]-     | 377.19690 | 378.20424 | 0.188 |
| C23H30O3    | 1 | [M+Na]+    | 377.21010 | 354.21950 | 3.666 |
| C22H34O5    | 2 | [M-H]-     | 377.23340 | 378.24063 | 0.117 |
| C23H38O4    | 3 | [M-H]-     | 377.26980 | 378.27701 | 0.156 |
| C27H38O     | 1 | [M-H]-     | 377.28500 | 378.29227 | 0.011 |
| C24H42O3    | 1 | [M-H]-     | 377.30620 | 378.31340 | 0.196 |
| C25H46O2    | 2 | [M-H]-     | 377.34250 | 378.34978 | 0.029 |
| C24H50O     | 1 | [M+Na]+    | 377.37720 | 354.38617 | 4.804 |
| C20H39NO3   | 4 | [M-2H+K]-  | 378.24120 | 341.29299 | 1.042 |
| C18H38NO5P  | 1 | [M-H]-     | 378.24120 | 379.24876 | 0.772 |
| C23H41NO3   | 6 | [M-H]-     | 378.30130 | 379.30864 | 0.196 |
| C22H44FNO   | 2 | [M-2H+Na]- | 378.31390 | 357.34069 | 2.271 |
| C21H29FO5   | 2 | [M-H]-     | 379.19130 | 380.19990 | 3.518 |
| C24H28O4    | 1 | [M-H]-     | 379.19130 | 380.19876 | 0.504 |
| C22H36O5    | 2 | [M-H]-     | 379.24890 | 380.25628 | 0.279 |
| C23H40O4    | 4 | [M-H]-     | 379.28530 | 380.29266 | 0.240 |
| C21H44NO2   | 1 | [M-2H+K]-  | 379.28530 | 342.33720 | 1.329 |

|            |   |            |           |           |       |
|------------|---|------------|-----------|-----------|-------|
| C24H44O3   | 1 | [M-H]-     | 379.32170 | 380.32905 | 0.200 |
| C25H48O2   | 2 | [M-H]-     | 379.35810 | 380.36543 | 0.161 |
| C18H40NO5P | 2 | [M-H]-     | 380.25660 | 381.26441 | 1.425 |
| C22H39NO4  | 2 | [M-H]-     | 380.28060 | 381.28791 | 0.103 |
| C24H41NO   | 2 | [M-2H+Na]- | 380.29330 | 359.31881 | 1.104 |
| C23H43NO3  | 2 | [M-H]-     | 380.31690 | 381.32429 | 0.326 |
| C24H30O4   | 1 | [M-H]-     | 381.20720 | 382.21441 | 0.155 |
| C25H34O3   | 2 | [M-H]-     | 381.24360 | 382.25080 | 0.194 |
| C22H38O5   | 1 | [M-H]-     | 381.26470 | 382.27193 | 0.115 |
| C26H38O2   | 1 | [M-H]-     | 381.27990 | 382.28718 | 0.029 |
| C23H42O4   | 1 | [M-H]-     | 381.30110 | 382.30831 | 0.155 |
| C27H42O    | 1 | [M-H]-     | 381.31630 | 382.32357 | 0.010 |
| C24H46O3   | 2 | [M-H]-     | 381.33740 | 382.34470 | 0.068 |
| C24H44O3   | 1 | [M+H]+     | 381.33760 | 380.32905 | 3.367 |
| C25H50O2   | 1 | [M-H]-     | 381.37370 | 382.38108 | 0.291 |
| C16H34NO7P | 1 | [M-H]-     | 382.20000 | 383.20729 | 0.058 |
| C22H35NO2  | 1 | [M-2H+K]-  | 382.21500 | 345.26678 | 0.992 |
| C23H39NO   | 2 | [M-2H+K]-  | 382.25140 | 345.30316 | 0.952 |
| C22H41NO4  | 2 | [M-H]-     | 382.29630 | 383.30356 | 0.029 |
| C21H28O4   | 1 | [M+K]+     | 383.16270 | 344.19876 | 2.059 |
| C24H32O4   | 2 | [M-H]-     | 383.22260 | 384.23006 | 0.498 |
| C21H40N2O4 | 1 | [M-H]-     | 383.28970 | 384.29881 | 4.795 |
| C26H40O2   | 1 | [M-H]-     | 383.29540 | 384.30283 | 0.420 |
| C23H44O4   | 1 | [M-H]-     | 383.31650 | 384.32396 | 0.498 |
| C27H44O    | 1 | [M-H]-     | 383.33180 | 384.33922 | 0.381 |
| C24H48O3   | 1 | [M-H]-     | 383.35290 | 384.36035 | 0.459 |
| C22H37NO2  | 2 | [M-2H+K]-  | 384.23050 | 347.28243 | 1.377 |
| C23H38FNO  | 1 | [M-2H+Na]- | 384.26690 | 363.29374 | 2.366 |
| C23H45NO3  | 1 | [M+H]+     | 384.34700 | 383.33994 | 0.557 |
| C21H30O4   | 2 | [M+K]+     | 385.17570 | 346.21441 | 4.832 |
| C23H30O5   | 1 | [M-H]-     | 385.20190 | 386.20933 | 0.405 |
| C24H34O4   | 1 | [M-H]-     | 385.23830 | 386.24571 | 0.366 |
| C26H42O2   | 2 | [M-H]-     | 385.31130 | 386.31848 | 0.231 |
| C27H43F    | 2 | [M-H]-     | 385.32800 | 386.33488 | 1.015 |
| C22H39NO2  | 2 | [M-2H+K]-  | 386.24620 | 349.29808 | 1.240 |
| C22H28O6   | 1 | [M-H]-     | 387.18130 | 388.18859 | 0.054 |
| C23H32O5   | 2 | [M-H]-     | 387.21780 | 388.22498 | 0.243 |
| C24H36O4   | 2 | [M-H]-     | 387.25430 | 388.26136 | 0.540 |
| C25H40O3   | 2 | [M-H]-     | 387.29060 | 388.29775 | 0.320 |
| C26H44O2   | 2 | [M-H]-     | 387.32700 | 388.33413 | 0.359 |
| C22H41NO2  | 2 | [M-2H+K]-  | 388.26190 | 351.31373 | 1.105 |
| C22H30O6   | 1 | [M-H]-     | 389.19710 | 390.20424 | 0.331 |
| C24H32O3   | 2 | [M-2H+Na]- | 389.20970 | 368.23515 | 1.254 |
| C21H36O4   | 2 | [M-2H+K]-  | 389.20970 | 352.26136 | 0.671 |
| C23H34O5   | 2 | [M-H]-     | 389.23340 | 390.24063 | 0.113 |
| C25H36O2   | 2 | [M-2H+Na]- | 389.24590 | 368.27153 | 0.778 |
| C24H38O4   | 1 | [M-H]-     | 389.26980 | 390.27701 | 0.152 |
| C25H42O3   | 1 | [M-H]-     | 389.30610 | 390.31340 | 0.067 |
| C26H46O2   | 1 | [M-H]-     | 389.34240 | 390.34978 | 0.285 |

|            |   |            |           |           |       |
|------------|---|------------|-----------|-----------|-------|
| C21H39NO3  | 1 | [M-2H+K]-  | 390.24100 | 353.29299 | 1.522 |
| C22H43NO2  | 2 | [M-2H+K]-  | 390.27750 | 353.32938 | 1.227 |
| C22H43NO3  | 6 | [M-2H+Na]- | 390.29830 | 369.32429 | 0.154 |
| C18H24O5S  | 1 | [M+K]+     | 391.09900 | 352.13445 | 3.585 |
| C19H30O5S  | 1 | [M-2H+Na]- | 391.15520 | 370.18140 | 0.675 |
| C24H32O3   | 1 | [M+Na]+    | 391.22510 | 368.23515 | 1.874 |
| C21H36O4   | 1 | [M+K]+     | 391.22510 | 352.26136 | 1.506 |
| C21H38O4   | 4 | [M-2H+K]-  | 391.22550 | 354.27701 | 0.284 |
| C24H34O3   | 2 | [M-2H+Na]- | 391.22550 | 370.25080 | 1.631 |
| C19H37O6P  | 1 | [M-H]-     | 391.22550 | 392.23278 | 0.020 |
| C24H40O4   | 1 | [M-H]-     | 391.28530 | 392.29266 | 0.233 |
| C26H48O2   | 1 | [M-H]-     | 391.35800 | 392.36543 | 0.411 |
| C19H40NO5P | 2 | [M-H]-     | 392.25670 | 393.26441 | 1.127 |
| C24H37NO2  | 2 | [M-2H+Na]- | 392.25670 | 371.28243 | 0.523 |
| C21H41NO3  | 1 | [M-2H+K]-  | 392.25670 | 355.30864 | 1.387 |
| C22H39N3O3 | 2 | [M-H]-     | 392.29320 | 393.29914 | 3.385 |
| C22H45NO2  | 1 | [M-2H+K]-  | 392.29320 | 355.34503 | 1.094 |
| C20H26O8   | 1 | [M-H]-     | 393.15570 | 394.16277 | 0.506 |
| C25H30O4   | 1 | [M-H]-     | 393.20720 | 394.21441 | 0.150 |
| C22H32O4S  | 1 | [M+H]+     | 393.20940 | 392.20213 | 0.008 |
| C20H36O6   | 2 | [M-2H+Na]- | 393.22570 | 372.25119 | 1.127 |
| C25H38O    | 1 | [M+K]+     | 393.25500 | 354.29227 | 1.058 |
| C23H38O5   | 1 | [M-H]-     | 393.26470 | 394.27193 | 0.112 |
| C27H38O2   | 1 | [M-H]-     | 393.27990 | 394.28718 | 0.028 |
| C24H42O4   | 1 | [M-H]-     | 393.30110 | 394.30831 | 0.150 |
| C28H42O    | 1 | [M-H]-     | 393.31640 | 394.32357 | 0.264 |
| C26H50O2   | 2 | [M-H]-     | 393.37370 | 394.38108 | 0.282 |
| C22H44FNO  | 2 | [M-2H+K]-  | 394.28770 | 357.34069 | 4.040 |
| C22H39N3O3 | 3 | [M+H]+     | 394.30690 | 393.29914 | 1.238 |
| C22H45NO2  | 2 | [M+K]+     | 394.30690 | 355.34503 | 3.244 |
| C25H43NO   | 2 | [M-2H+Na]- | 394.30880 | 373.33446 | 0.685 |
| C16H20O9   | 3 | [M+K]+     | 395.07390 | 356.11074 | 0.038 |
| C21H32O5S  | 2 | [M-H]-     | 395.19020 | 396.19705 | 1.068 |
| C22H36O6   | 1 | [M-H]-     | 395.24390 | 396.25119 | 0.053 |
| C23H40O5   | 4 | [M-H]-     | 395.28030 | 396.28758 | 0.015 |
| C27H40O2   | 2 | [M-H]-     | 395.29560 | 396.30283 | 0.099 |
| C28H44O    | 1 | [M-H]-     | 395.33200 | 396.33922 | 0.137 |
| C26H52O2   | 1 | [M-H]-     | 395.38940 | 396.39673 | 0.154 |
| C16H32NO8P | 1 | [M-H]-     | 396.17890 | 397.18656 | 0.977 |
| C24H41NO   | 2 | [M-2H+K]-  | 396.26690 | 359.31881 | 1.297 |
| C17H26O9   | 3 | [M+Na]+    | 397.14710 | 374.15769 | 0.486 |
| C24H30O5   | 1 | [M-H]-     | 397.20200 | 398.20933 | 0.141 |
| C25H34O4   | 1 | [M-H]-     | 397.23830 | 398.24571 | 0.355 |
| C26H38O3   | 1 | [M-H]-     | 397.27470 | 398.28210 | 0.317 |
| C27H42O2   | 2 | [M-H]-     | 397.31110 | 398.31848 | 0.279 |
| C24H46O4   | 1 | [M-H]-     | 397.33230 | 398.33961 | 0.103 |
| C28H46O    | 1 | [M-H]-     | 397.34760 | 398.35487 | 0.010 |
| C25H50O3   | 1 | [M-H]-     | 397.36880 | 398.37600 | 0.186 |
| C22H35NO3  | 1 | [M-2H+K]-  | 398.20990 | 361.26169 | 0.989 |

|            |   |            |           |           |       |
|------------|---|------------|-----------|-----------|-------|
| C23H39NO2  | 1 | [M-2H+K]-  | 398.24620 | 361.29808 | 1.203 |
| C21H28O6   | 1 | [M+Na]+    | 399.17960 | 376.18859 | 4.479 |
| C22H32O4   | 1 | [M+K]+     | 399.19410 | 360.23006 | 2.227 |
| C24H32O5   | 1 | [M-H]-     | 399.21760 | 400.22498 | 0.266 |
| C23H36O4   | 1 | [M+Na]+    | 399.24920 | 376.26136 | 3.461 |
| C25H34O4   | 1 | [M+H]+     | 399.25100 | 398.24571 | 4.962 |
| C25H36O4   | 1 | [M-H]-     | 399.25400 | 400.26136 | 0.228 |
| C26H40O3   | 1 | [M-H]-     | 399.29030 | 400.29775 | 0.441 |
| C27H44O2   | 1 | [M-H]-     | 399.32670 | 400.33413 | 0.403 |
| C28H48O    | 1 | [M-H]-     | 399.36290 | 400.37052 | 0.866 |
| C22H37NO3  | 1 | [M-2H+K]-  | 400.22550 | 363.27734 | 1.109 |
| C23H41NO3  | 6 | [M-2H+Na]- | 400.28290 | 379.30864 | 0.475 |
| C23H45NO4  | 1 | [M+H]+     | 400.34280 | 399.33486 | 1.676 |
| C21H30O6   | 1 | [M+Na]+    | 401.19320 | 378.20424 | 0.653 |
| C23H30O6   | 1 | [M-H]-     | 401.19720 | 402.20424 | 0.571 |
| C24H34O5   | 1 | [M-H]-     | 401.23350 | 402.24063 | 0.359 |
| C25H38O4   | 3 | [M-H]-     | 401.26980 | 402.27701 | 0.147 |
| C26H42O3   | 1 | [M-H]-     | 401.30610 | 402.31340 | 0.065 |
| C26H40O3   | 1 | [M+H]+     | 401.30650 | 400.29775 | 3.698 |
| C27H46O2   | 2 | [M-H]-     | 401.34240 | 402.34978 | 0.277 |
| C23H32O6   | 2 | [M-H]-     | 403.21260 | 404.21989 | 0.052 |
| C25H34O3   | 2 | [M-2H+Na]- | 403.22500 | 382.25080 | 0.342 |
| C24H36O5   | 1 | [M-H]-     | 403.24900 | 404.25628 | 0.015 |
| C25H40O4   | 1 | [M-H]-     | 403.28540 | 404.29266 | 0.022 |
| C26H44O3   | 1 | [M-H]-     | 403.32180 | 404.32905 | 0.060 |
| C27H48O2   | 3 | [M-H]-     | 403.35830 | 404.36543 | 0.345 |
| C28H50O    | 1 | [M+H]+     | 403.39320 | 402.38617 | 0.585 |
| C17H38NO5P | 1 | [M-2H+K]-  | 404.19920 | 367.24876 | 4.547 |
| C22H41NO3  | 2 | [M-2H+K]-  | 404.25680 | 367.30864 | 1.098 |
| C22H30O7   | 1 | [M-H]-     | 405.19180 | 406.19916 | 0.212 |
| C21H36O5   | 2 | [M-2H+K]-  | 405.20420 | 368.25628 | 1.668 |
| C24H32O4   | 2 | [M-2H+Na]- | 405.20420 | 384.23006 | 0.180 |
| C23H34O6   | 1 | [M-H]-     | 405.22830 | 406.23554 | 0.072 |
| C24H38O5   | 1 | [M-H]-     | 405.26480 | 406.27193 | 0.355 |
| C23H42O4   | 1 | [M+Na]+    | 405.29610 | 382.30831 | 3.533 |
| C25H40O4   | 1 | [M+H]+     | 405.30070 | 404.29266 | 1.897 |
| C25H42O4   | 1 | [M-H]-     | 405.30100 | 406.30831 | 0.101 |
| C27H50O2   | 1 | [M-H]-     | 405.37380 | 406.38108 | 0.027 |
| C22H43NO3  | 6 | [M-2H+K]-  | 406.27210 | 369.32429 | 1.954 |
| C26H43NO   | 2 | [M-2H+Na]- | 406.30880 | 385.33446 | 0.665 |
| C23H47NO2  | 1 | [M-2H+K]-  | 406.30880 | 369.36068 | 1.181 |
| C19H28O6S  | 1 | [M+Na]+    | 407.14860 | 384.16066 | 3.154 |
| C26H32O4   | 1 | [M-H]-     | 407.22270 | 408.23006 | 0.223 |
| C23H36O6   | 1 | [M-H]-     | 407.24380 | 408.25119 | 0.297 |
| C24H40O5   | 1 | [M-H]-     | 407.28010 | 408.28758 | 0.506 |
| C28H40O2   | 1 | [M-H]-     | 407.29540 | 408.30283 | 0.395 |
| C23H44O4   | 1 | [M+Na]+    | 407.31320 | 384.32396 | 0.044 |
| C26H48O3   | 1 | [M-H]-     | 407.35290 | 408.36035 | 0.432 |
| C27H52O2   | 1 | [M-H]-     | 407.38930 | 408.39673 | 0.395 |

|            |   |            |           |           |       |
|------------|---|------------|-----------|-----------|-------|
| C24H37NO2  | 2 | [M-2H+K]-  | 408.23060 | 371.28243 | 1.051 |
| C21H41NO4  | 1 | [M-2H+K]-  | 408.25160 | 371.30356 | 1.369 |
| C26H45NO   | 2 | [M-2H+Na]- | 408.32460 | 387.35011 | 1.029 |
| C19H30O5S  | 1 | [M+K]+     | 409.14650 | 370.18140 | 4.771 |
| C22H34O7   | 1 | [M-H]-     | 409.22330 | 410.23046 | 0.279 |
| C24H36O4   | 2 | [M-2H+Na]- | 409.23560 | 388.26136 | 0.423 |
| C19H39O7P  | 1 | [M-H]-     | 409.23560 | 410.24334 | 1.156 |
| C23H38O6   | 1 | [M-H]-     | 409.25980 | 410.26684 | 0.560 |
| C27H38O3   | 1 | [M-H]-     | 409.27490 | 410.28210 | 0.181 |
| C23H42N2O4 | 1 | [M-H]-     | 409.30520 | 410.31446 | 4.857 |
| C28H42O2   | 2 | [M-H]-     | 409.31130 | 410.31848 | 0.217 |
| C29H46O    | 1 | [M-H]-     | 409.34780 | 410.35487 | 0.498 |
| C26H50O3   | 2 | [M-H]-     | 409.36880 | 410.37600 | 0.181 |
| C27H54O2   | 2 | [M-H]-     | 409.40510 | 410.41238 | 0.027 |
| C22H37NO4S | 1 | [M-H]-     | 410.23880 | 411.24433 | 4.237 |
| C24H39NO2  | 1 | [M-2H+K]-  | 410.24640 | 373.29808 | 0.680 |
| C25H43NO   | 2 | [M-2H+K]-  | 410.28270 | 373.33446 | 0.887 |
| C25H43NO2  | 2 | [M-2H+Na]- | 410.30370 | 389.32938 | 0.621 |
| C27H40O3   | 1 | [M-H]-     | 411.29040 | 412.29775 | 0.185 |
| C28H44O2   | 4 | [M-H]-     | 411.32690 | 412.33413 | 0.095 |
| C29H48O    | 1 | [M-H]-     | 411.36320 | 412.37052 | 0.112 |
| C26H52O3   | 1 | [M-H]-     | 411.38440 | 412.39165 | 0.058 |
| C23H37NO3  | 1 | [M-2H+K]-  | 412.22550 | 375.27734 | 1.077 |
| C24H41NO2  | 1 | [M-2H+K]-  | 412.26200 | 375.31373 | 0.798 |
| C25H43NO2  | 1 | [M+Na]+    | 412.31840 | 389.32938 | 0.485 |
| C26H53NO2  | 1 | [M+H]+     | 412.41570 | 411.40763 | 1.940 |
| C21H32O6S  | 1 | [M+H]+     | 413.20040 | 412.19196 | 2.824 |
| C23H34O4   | 1 | [M+K]+     | 413.20690 | 374.24571 | 4.746 |
| C24H38O4   | 5 | [M+Na]+    | 413.26700 | 390.27701 | 1.858 |
| C27H42O3   | 1 | [M-H]-     | 413.30610 | 414.31340 | 0.063 |
| C28H46O2   | 2 | [M-H]-     | 413.34240 | 414.34978 | 0.269 |
| C22H35NO4  | 1 | [M-2H+K]-  | 414.20480 | 377.25661 | 0.987 |
| C19H40NO5P | 2 | [M-2H+Na]- | 414.23700 | 393.26441 | 3.568 |
| C23H39NO3  | 1 | [M-2H+K]-  | 414.24120 | 377.29299 | 0.951 |
| C22H39N3O3 | 2 | [M-2H+Na]- | 414.27320 | 393.29914 | 0.019 |
| C22H34O4S  | 1 | [M-2H+Na]- | 415.19160 | 394.21778 | 0.600 |
| C24H32O6   | 2 | [M-H]-     | 415.21250 | 416.21989 | 0.291 |
| C19H37O6P  | 3 | [M+Na]+    | 415.22260 | 392.23278 | 1.447 |
| C23H36O4   | 1 | [M+K]+     | 415.22260 | 376.26136 | 4.602 |
| C25H36O5   | 1 | [M-H]-     | 415.24880 | 416.25628 | 0.496 |
| C26H40O4   | 1 | [M-H]-     | 415.28520 | 416.29266 | 0.460 |
| C27H44O3   | 1 | [M-H]-     | 415.32160 | 416.32905 | 0.424 |
| C28H48O2   | 2 | [M-H]-     | 415.35810 | 416.36543 | 0.147 |
| C22H37NO4  | 1 | [M-2H+K]-  | 416.22050 | 379.27226 | 0.863 |
| C23H41NO3  | 6 | [M-2H+K]-  | 416.25670 | 379.30864 | 1.307 |
| C21H32O5S  | 2 | [M-2H+Na]- | 417.17070 | 396.19705 | 0.992 |
| C23H38O4   | 1 | [M+K]+     | 417.24070 | 378.27701 | 1.292 |
| C23H40O4   | 4 | [M-2H+K]-  | 417.24090 | 380.29266 | 0.865 |
| C21H39O6P  | 1 | [M-H]-     | 417.24090 | 418.24843 | 0.618 |

|            |   |            |           |           |       |
|------------|---|------------|-----------|-----------|-------|
| C26H42O4   | 2 | [M-H]-     | 417.30100 | 418.30831 | 0.098 |
| C27H46O3   | 1 | [M-H]-     | 417.33740 | 418.34470 | 0.062 |
| C28H50O2   | 3 | [M-H]-     | 417.37390 | 418.38108 | 0.213 |
| C18H40NO5P | 2 | [M-2H+K]-  | 418.21500 | 381.26441 | 4.754 |
| C22H39NO4  | 2 | [M-2H+K]-  | 418.23640 | 381.28791 | 0.261 |
| C23H43NO3  | 2 | [M-2H+K]-  | 418.27250 | 381.32429 | 0.942 |
| C27H43NO   | 2 | [M-2H+Na]- | 418.30890 | 397.33446 | 0.885 |
| C24H41N3O3 | 1 | [M-H]-     | 418.30890 | 419.31479 | 3.294 |
| C24H47NO2  | 1 | [M-2H+K]-  | 418.30890 | 381.36068 | 0.908 |
| C23H40O5   | 1 | [M+Na]+    | 419.27690 | 396.28758 | 0.246 |
| C24H46O3   | 2 | [M-2H+K]-  | 419.29530 | 382.34470 | 4.779 |
| C29H40O2   | 1 | [M-H]-     | 419.29530 | 420.30283 | 0.622 |
| C26H44O4   | 1 | [M-H]-     | 419.31660 | 420.32396 | 0.217 |
| C27H48O3   | 1 | [M-H]-     | 419.35290 | 420.36035 | 0.420 |
| C28H52O2   | 2 | [M-H]-     | 419.38940 | 420.39673 | 0.145 |
| C22H41NO4  | 2 | [M-2H+K]-  | 420.25190 | 383.30356 | 0.616 |
| C20H40NO6P | 1 | [M-H]-     | 420.25190 | 421.25933 | 0.374 |
| C23H45NO3  | 1 | [M-2H+K]-  | 420.28810 | 383.33994 | 1.056 |
| C24H43N3O3 | 2 | [M-H]-     | 420.32470 | 421.33044 | 3.635 |
| C27H45NO   | 2 | [M-2H+Na]- | 420.32470 | 399.35011 | 1.237 |
| C24H49NO2  | 1 | [M-2H+K]-  | 420.32470 | 383.37633 | 0.547 |
| C23H31FO6  | 1 | [M-H]-     | 421.20190 | 422.21047 | 3.084 |
| C20H37O7P  | 1 | [M+H]+     | 421.23290 | 420.22769 | 4.898 |
| C25H34O4   | 1 | [M+Na]+    | 421.23290 | 398.24571 | 4.824 |
| C24H38O6   | 1 | [M-H]-     | 421.25970 | 422.26684 | 0.306 |
| C28H38O3   | 1 | [M-H]-     | 421.27470 | 422.28210 | 0.299 |
| C25H42O5   | 1 | [M-H]-     | 421.29600 | 422.30323 | 0.104 |
| C24H46O3   | 1 | [M+K]+     | 421.30610 | 382.34470 | 4.144 |
| C27H42O2   | 1 | [M+Na]+    | 421.30610 | 398.31848 | 3.802 |
| C30H46O    | 1 | [M-H]-     | 421.34760 | 422.35487 | 0.009 |
| C28H54O2   | 2 | [M-H]-     | 421.40510 | 422.41238 | 0.026 |
| C30H60     | 1 | [M+H]+     | 421.47680 | 420.46950 | 0.069 |
| C18H23O8S  | 1 | [M+Na]+    | 422.10060 | 399.11140 | 0.050 |
| C26H43NO   | 2 | [M-2H+K]-  | 422.28250 | 385.33446 | 1.336 |
| C24H49NO2  | 2 | [M+K]+     | 422.33810 | 383.37633 | 3.268 |
| C27H45NO   | 2 | [M+Na]+    | 422.33810 | 399.35011 | 2.924 |
| C24H43N3O3 | 2 | [M+H]+     | 422.33810 | 421.33044 | 0.919 |
| C27H47NO   | 2 | [M-2H+Na]- | 422.34010 | 401.36576 | 0.639 |
| C22H32O8   | 1 | [M-H]-     | 423.20280 | 424.20972 | 0.825 |
| C24H32O5   | 1 | [M+Na]+    | 423.21440 | 400.22498 | 0.480 |
| C24H40O6   | 1 | [M-H]-     | 423.27550 | 424.28249 | 0.659 |
| C27H43F    | 2 | [M-2H+K]-  | 423.28500 | 386.33488 | 3.593 |
| C25H41FO4  | 2 | [M-H]-     | 423.29060 | 424.29889 | 2.407 |
| C28H40O3   | 1 | [M-H]-     | 423.29060 | 424.29775 | 0.293 |
| C29H44O2   | 1 | [M-H]-     | 423.32690 | 424.33413 | 0.092 |
| C30H48O    | 1 | [M-H]-     | 423.36320 | 424.37052 | 0.109 |
| C28H56O2   | 1 | [M-H]-     | 423.42080 | 424.42803 | 0.092 |
| C26H45NO   | 2 | [M-2H+K]-  | 424.29820 | 387.35011 | 1.211 |
| C26H45NO2  | 2 | [M-2H+Na]- | 424.31910 | 403.34503 | 0.012 |



|            |   |            |           |           |       |
|------------|---|------------|-----------|-----------|-------|
| C27H43N3O  | 1 | [M-H]-     | 424.33470 | 425.34061 | 3.200 |
| C24H34O4   | 1 | [M+K]+     | 425.20980 | 386.24571 | 2.208 |
| C23H38O7   | 1 | [M-H]-     | 425.25490 | 426.26176 | 0.974 |
| C27H38O4   | 1 | [M-H]-     | 425.26980 | 426.27701 | 0.139 |
| C28H42O3   | 1 | [M-H]-     | 425.30620 | 426.31340 | 0.174 |
| C27H46O2   | 1 | [M+Na]+    | 425.33840 | 402.34978 | 1.415 |
| C29H46O2   | 1 | [M-H]-     | 425.34250 | 426.34978 | 0.026 |
| C26H50O4   | 1 | [M-H]-     | 425.36360 | 426.37091 | 0.096 |
| C30H48O    | 1 | [M+H]+     | 425.37630 | 424.37052 | 3.493 |
| C30H50O    | 2 | [M-H]-     | 425.37890 | 426.38617 | 0.009 |
| C27H54O3   | 1 | [M-H]-     | 425.39990 | 426.40730 | 0.296 |
| C20H37NO4S | 1 | [M+K]+     | 426.20830 | 387.24433 | 1.919 |
| C24H39NO3  | 1 | [M-2H+K]-  | 426.24150 | 389.29299 | 0.221 |
| C22H38NO5P | 1 | [M-H]-     | 426.24150 | 427.24876 | 0.019 |
| C25H43NO2  | 2 | [M-2H+K]-  | 426.27780 | 389.32938 | 0.420 |
| C26H44FNO  | 1 | [M-2H+Na]- | 426.31420 | 405.34069 | 1.311 |
| C26H45NO2  | 1 | [M+Na]+    | 426.33330 | 403.34503 | 2.228 |
| C27H40O4   | 1 | [M-H]-     | 427.28550 | 428.29266 | 0.255 |
| C28H44O3   | 1 | [M-H]-     | 427.32190 | 428.32905 | 0.290 |
| C29H48O2   | 1 | [M-H]-     | 427.35820 | 428.36543 | 0.091 |
| C23H37NO4  | 1 | [M-2H+K]-  | 428.22070 | 391.27226 | 0.371 |
| C24H41NO3  | 1 | [M-2H+K]-  | 428.25710 | 391.30864 | 0.336 |
| C25H45NO2  | 1 | [M-2H+K]-  | 428.29360 | 391.34503 | 0.068 |
| C25H49NO4  | 1 | [M+H]+     | 428.37390 | 427.36616 | 1.097 |
| C18H37O9P  | 1 | [M+H]+     | 429.22310 | 428.21752 | 3.944 |
| C23H34O6   | 1 | [M+Na]+    | 429.22310 | 406.23554 | 3.872 |
| C26H38O5   | 2 | [M-H]-     | 429.26460 | 430.27193 | 0.130 |
| C27H42O4   | 1 | [M-H]-     | 429.30100 | 430.30831 | 0.096 |
| C28H46O3   | 1 | [M-H]-     | 429.33750 | 430.34470 | 0.172 |
| C29H50O2   | 2 | [M-H]-     | 429.37390 | 430.38108 | 0.207 |
| C23H39NO4  | 1 | [M-2H+K]-  | 430.23630 | 393.28791 | 0.486 |
| C19H37O7P  | 1 | [M+Na]+    | 431.21700 | 408.22769 | 0.199 |
| C26H40O5   | 1 | [M-H]-     | 431.28030 | 432.28758 | 0.014 |
| C27H41FO3  | 1 | [M-H]-     | 431.29550 | 432.30397 | 2.792 |
| C27H44O4   | 1 | [M-H]-     | 431.31670 | 432.32396 | 0.021 |
| C28H48O3   | 1 | [M-H]-     | 431.35310 | 432.36035 | 0.056 |
| C27H54O2   | 2 | [M-2H+Na]- | 431.38640 | 410.41238 | 0.109 |
| C29H52O2   | 1 | [M-H]-     | 431.38960 | 432.39673 | 0.322 |
| C24H45NO3  | 1 | [M-2H+K]-  | 432.28850 | 395.33994 | 0.102 |
| C18H35O7P  | 1 | [M+K]+     | 433.17510 | 394.21204 | 0.215 |
| C24H31FO6  | 1 | [M-H]-     | 433.20220 | 434.21047 | 2.306 |
| C19H39O7P  | 2 | [M+Na]+    | 433.23280 | 410.24334 | 0.545 |
| C21H37O7P  | 1 | [M+H]+     | 433.23280 | 432.22769 | 4.993 |
| C23H40O5   | 4 | [M-2H+K]-  | 433.23570 | 396.28758 | 1.099 |
| C21H39O7P  | 1 | [M-H]-     | 433.23570 | 434.24334 | 0.861 |
| C28H42O    | 1 | [M+K]+     | 433.28730 | 394.32357 | 1.348 |
| C26H42O5   | 1 | [M-H]-     | 433.29610 | 434.30323 | 0.332 |
| C28H44O2   | 4 | [M-2H+Na]- | 433.30810 | 412.33413 | 0.224 |
| C27H43FO3  | 1 | [M-H]-     | 433.31150 | 434.31962 | 1.971 |

|            |   |            |           |           |       |
|------------|---|------------|-----------|-----------|-------|
| C27H46O4   | 1 | [M-H]-     | 433.33260 | 434.33961 | 0.598 |
| C28H50O3   | 1 | [M-H]-     | 433.36900 | 434.37600 | 0.632 |
| C29H54O2   | 1 | [M-H]-     | 433.40540 | 434.41238 | 0.667 |
| C26H39NO3  | 2 | [M-2H+Na]- | 434.26770 | 413.29299 | 1.474 |
| C27H43NO   | 2 | [M-2H+K]-  | 434.28290 | 397.33446 | 0.378 |
| C27H43NO2  | 2 | [M-2H+Na]- | 434.30390 | 413.32938 | 1.048 |
| C28H47NO   | 2 | [M-2H+Na]- | 434.34030 | 413.36570 | 1.229 |
| C25H51NO2  | 1 | [M-2H+K]-  | 434.34030 | 397.39198 | 0.645 |
| C28H48FNO  | 1 | [M+H]+     | 434.37820 | 433.37199 | 2.447 |
| C21H29ClO5 | 1 | [M+K]+     | 435.13460 | 396.17035 | 2.519 |
| C18H37O7P  | 1 | [M+K]+     | 435.18870 | 396.22769 | 4.924 |
| C25H40O6   | 1 | [M-H]-     | 435.27520 | 436.28249 | 0.048 |
| C27H48O4   | 2 | [M-H]-     | 435.34810 | 436.35526 | 0.250 |
| C28H52O3   | 1 | [M-H]-     | 435.38460 | 436.39165 | 0.514 |
| C29H56O2   | 2 | [M-H]-     | 435.42100 | 436.42803 | 0.549 |
| C26H39NO3  | 4 | [M+Na]+    | 436.28300 | 413.29299 | 1.799 |
| C21H44NO6P | 2 | [M-H]-     | 436.28340 | 437.29063 | 0.099 |
| C23H45NO4  | 1 | [M-2H+K]-  | 436.28340 | 399.33486 | 0.135 |
| C27H45NO   | 2 | [M-2H+K]-  | 436.29850 | 399.35011 | 0.490 |
| C27H45NO2  | 2 | [M-2H+Na]- | 436.31960 | 415.34503 | 1.157 |
| C24H38O7   | 1 | [M-H]-     | 437.25490 | 438.26176 | 0.947 |
| C25H42O6   | 1 | [M-H]-     | 437.29140 | 438.29814 | 1.210 |
| C29H42O3   | 1 | [M-H]-     | 437.30640 | 438.31340 | 0.627 |
| C26H46O5   | 2 | [M-H]-     | 437.32760 | 438.33453 | 0.787 |
| C29H58O2   | 1 | [M-H]-     | 437.43660 | 438.44368 | 0.432 |
| C29H56O2   | 1 | [M+H]+     | 437.43720 | 436.42803 | 4.341 |
| C27H47NO   | 2 | [M-2H+K]-  | 438.31410 | 401.36576 | 0.602 |
| C29H43NO2  | 1 | [M+H]+     | 438.33480 | 437.32938 | 4.218 |
| C27H45NO2  | 1 | [M+Na]+    | 438.33480 | 415.34503 | 1.255 |
| C27H47NO2  | 2 | [M-2H+Na]- | 438.33540 | 417.36068 | 1.492 |
| C30H42     | 1 | [M-2H+K]-  | 439.27880 | 402.32865 | 3.526 |
| C27H43FO   | 1 | [M-2H+K]-  | 439.27880 | 402.32979 | 0.924 |
| C21H43O7P  | 1 | [M+H]+     | 439.28130 | 438.27464 | 1.395 |
| C26H40O4   | 1 | [M+Na]+    | 439.28130 | 416.29266 | 1.325 |
| C29H44O3   | 2 | [M-H]-     | 439.32170 | 440.32905 | 0.173 |
| C30H48O2   | 2 | [M-H]-     | 439.35820 | 440.36543 | 0.089 |
| C31H52O    | 1 | [M-H]-     | 439.39490 | 440.40182 | 0.806 |
| C25H41NO3  | 1 | [M-2H+K]-  | 440.25710 | 403.30864 | 0.327 |
| C26H45NO2  | 2 | [M-2H+K]-  | 440.29340 | 403.34503 | 0.520 |
| C26H39N3O3 | 1 | [M-H]-     | 440.29340 | 441.29914 | 3.470 |
| C21H46NO6P | 1 | [M+H]+     | 440.31210 | 439.30628 | 3.286 |
| C26H43NO3  | 1 | [M+Na]+    | 440.31210 | 417.32429 | 3.214 |
| C27H46FNO  | 1 | [M-2H+Na]- | 440.32990 | 419.35634 | 1.156 |
| C27H47NO2  | 2 | [M+Na]+    | 440.34900 | 417.36068 | 2.046 |
| C26H34O6   | 1 | [M-H]-     | 441.22830 | 442.23554 | 0.066 |
| C21H39O6P  | 1 | [M+Na]+    | 441.23790 | 418.24843 | 0.569 |
| C27H42F2O  | 1 | [M-2H+Na]- | 441.29520 | 420.32037 | 1.724 |
| C26H39F3O2 | 6 | [M+H]+     | 441.29810 | 440.29022 | 1.391 |
| C26H42O4   | 6 | [M+Na]+    | 441.29810 | 418.30831 | 1.287 |

|            |   |            |           |           |       |
|------------|---|------------|-----------|-----------|-------|
| C28H42O4   | 1 | [M-H]-     | 441.30110 | 442.30831 | 0.134 |
| C29H46O3   | 1 | [M-H]-     | 441.33740 | 442.34470 | 0.059 |
| C30H50O2   | 3 | [M-H]-     | 441.37400 | 442.38108 | 0.428 |
| C24H39NO4  | 1 | [M-2H+K]-  | 442.23630 | 405.28791 | 0.473 |
| C25H41NO4  | 1 | [M+Na]+    | 442.29450 | 419.30356 | 3.889 |
| C24H43N3O3 | 2 | [M-2H+Na]- | 442.30440 | 421.33044 | 0.244 |
| C18H35O10P | 1 | [M+H]+     | 443.20530 | 442.19679 | 2.802 |
| C25H32O7   | 1 | [M-H]-     | 443.20770 | 444.21481 | 0.370 |
| C27H40O5   | 1 | [M-H]-     | 443.28050 | 444.28758 | 0.438 |
| C30H46     | 1 | [M-2H+K]-  | 443.31050 | 406.35995 | 4.396 |
| C28H44O4   | 2 | [M-H]-     | 443.31670 | 444.32396 | 0.020 |
| C27H48O2   | 1 | [M+K]+     | 443.32990 | 404.36543 | 2.975 |
| C29H48O3   | 2 | [M-H]-     | 443.35320 | 444.36035 | 0.280 |
| C30H52O2   | 3 | [M-H]-     | 443.38950 | 444.39673 | 0.088 |
| C28H41NO2  | 1 | [M-2H+Na]- | 444.28830 | 423.31373 | 1.137 |
| C25H34O7   | 2 | [M-H]-     | 445.22340 | 446.23046 | 0.481 |
| C25H41FO4  | 2 | [M-2H+Na]- | 445.27510 | 424.29889 | 4.817 |
| C27H42O5   | 1 | [M-H]-     | 445.29600 | 446.30323 | 0.099 |
| C28H43FO3  | 1 | [M-H]-     | 445.31120 | 446.31962 | 2.591 |
| C28H46O4   | 1 | [M-H]-     | 445.33230 | 446.33961 | 0.092 |
| C29H50O3   | 1 | [M-H]-     | 445.36860 | 446.37600 | 0.283 |
| C30H54O2   | 1 | [M-H]-     | 445.40520 | 446.41238 | 0.200 |
| C26H51NO2  | 1 | [M-2H+K]-  | 446.34030 | 409.39198 | 0.627 |
| C27H44O5   | 2 | [M-H]-     | 447.31170 | 448.31888 | 0.210 |
| C26H50O3   | 2 | [M-2H+K]-  | 447.32680 | 410.37600 | 4.927 |
| C28H45FO3  | 1 | [M-H]-     | 447.32680 | 448.33527 | 2.692 |
| C28H48O4   | 2 | [M-H]-     | 447.34820 | 448.35526 | 0.467 |
| C30H56O2   | 4 | [M-H]-     | 447.42100 | 448.42803 | 0.534 |
| C26H53NO2  | 1 | [M-2H+K]-  | 448.35580 | 411.40763 | 0.959 |
| C27H38O4   | 1 | [M+Na]+    | 449.26650 | 426.27701 | 0.597 |
| C27H46O5   | 2 | [M-H]-     | 449.32750 | 450.33453 | 0.543 |
| C31H46O2   | 1 | [M-H]-     | 449.34260 | 450.34978 | 0.198 |
| C26H50O4   | 3 | [M+Na]+    | 449.36050 | 426.37091 | 0.819 |
| C28H48O4   | 2 | [M+H]+     | 449.36050 | 448.35526 | 4.520 |
| C28H50O4   | 2 | [M-H]-     | 449.36380 | 450.37091 | 0.354 |
| C30H58O2   | 2 | [M-H]-     | 449.43660 | 450.44368 | 0.421 |
| C18H38NO7P | 1 | [M+K]+     | 450.20360 | 411.23859 | 4.127 |
| C26H39NO3  | 2 | [M-2H+K]-  | 450.24150 | 413.29299 | 0.209 |
| C21H42NO7P | 1 | [M-H]-     | 450.26280 | 451.26989 | 0.395 |
| C23H43NO5  | 1 | [M-2H+K]-  | 450.26280 | 413.31412 | 0.169 |
| C27H43NO2  | 2 | [M-2H+K]-  | 450.27770 | 413.32938 | 0.620 |
| C28H47NO   | 2 | [M-2H+K]-  | 450.31400 | 413.36570 | 0.666 |
| C26H38O5   | 2 | [M-2H+Na]- | 451.24630 | 430.27193 | 0.683 |
| C22H43O7P  | 1 | [M+H]+     | 451.27980 | 450.27464 | 4.682 |
| C27H40O4   | 1 | [M+Na]+    | 451.27980 | 428.29266 | 4.614 |
| C29H40O4   | 1 | [M-H]-     | 451.28550 | 452.29266 | 0.242 |
| C30H44O3   | 2 | [M-H]-     | 451.32180 | 452.32905 | 0.053 |
| C27H48O5   | 2 | [M-H]-     | 451.34300 | 452.35018 | 0.208 |
| C31H48O2   | 1 | [M-H]-     | 451.35830 | 452.36543 | 0.308 |

|            |   |            |           |           |       |
|------------|---|------------|-----------|-----------|-------|
| C30H54     | 2 | [M-2H+K]-  | 451.37290 | 414.42255 | 3.875 |
| C30H60O2   | 1 | [M-H]-     | 451.45220 | 452.45933 | 0.308 |
| C21H42NO7P | 1 | [M+H]+     | 452.27780 | 451.26989 | 1.411 |
| C23H43NO5  | 1 | [M+K]+     | 452.27780 | 413.31412 | 1.163 |
| C21H44NO7P | 1 | [M-H]-     | 452.27830 | 453.28554 | 0.062 |
| C27H45NO2  | 2 | [M-2H+K]-  | 452.29320 | 415.34503 | 0.948 |
| C21H34O8   | 1 | [M+K]+     | 453.18850 | 414.22537 | 0.046 |
| C28H38O5   | 1 | [M-H]-     | 453.26490 | 454.27193 | 0.538 |
| C29H42O4   | 4 | [M-H]-     | 453.30130 | 454.30831 | 0.571 |
| C26H46O6   | 3 | [M-H]-     | 453.32250 | 454.32944 | 0.726 |
| C23H49O6P  | 1 | [M+H]+     | 453.33280 | 452.32668 | 2.532 |
| C28H46O3   | 1 | [M+Na]+    | 453.33280 | 430.34470 | 2.464 |
| C30H44O3   | 1 | [M+H]+     | 453.33640 | 452.32905 | 0.185 |
| C30H46O3   | 4 | [M-H]-     | 453.33760 | 454.34470 | 0.384 |
| C27H48O5   | 1 | [M+H]+     | 453.35720 | 452.35018 | 0.543 |
| C31H50O2   | 1 | [M-H]-     | 453.37380 | 454.38108 | 0.024 |
| C30H54O    | 1 | [M+Na]+    | 453.40530 | 430.41747 | 3.059 |
| C26H43NO3  | 2 | [M-2H+K]-  | 454.27240 | 417.32429 | 1.087 |
| C21H44NO7P | 1 | [M+H]+     | 454.29330 | 453.28554 | 1.074 |
| C27H47NO2  | 2 | [M-2H+K]-  | 454.30880 | 417.36068 | 1.057 |
| C28H48FNO  | 1 | [M-2H+Na]- | 454.34520 | 433.37199 | 1.891 |
| C26H40O5   | 2 | [M+Na]+    | 455.27660 | 432.28758 | 0.433 |
| C28H40O5   | 2 | [M-H]-     | 455.28040 | 456.28758 | 0.206 |
| C27H44O3   | 2 | [M+K]+     | 455.29050 | 416.32905 | 3.725 |
| C27H41FO3  | 2 | [M+Na]+    | 455.29480 | 432.30397 | 3.525 |
| C27H44O4   | 1 | [M+Na]+    | 455.31120 | 432.32396 | 4.353 |
| C27H41F3O2 | 1 | [M+H]+     | 455.31120 | 454.30587 | 4.252 |
| C29H42O4   | 1 | [M+H]+     | 455.31370 | 454.30831 | 4.131 |
| C29H44O4   | 1 | [M-H]-     | 455.31670 | 456.32396 | 0.020 |
| C30H48O3   | 2 | [M-H]-     | 455.35310 | 456.36035 | 0.053 |
| C31H52O2   | 1 | [M-H]-     | 455.38950 | 456.39673 | 0.086 |
| C25H41NO4  | 1 | [M-2H+K]-  | 456.25190 | 419.30356 | 0.568 |
| C24H31FO6  | 1 | [M+Na]+    | 457.19840 | 434.21047 | 2.822 |
| C26H34O7   | 1 | [M-H]-     | 457.22330 | 458.23046 | 0.249 |
| C26H42F2O4 | 1 | [M+H]+     | 457.31060 | 456.30512 | 3.910 |
| C27H43FO3  | 1 | [M+Na]+    | 457.31060 | 434.31962 | 3.838 |
| C29H46O4   | 2 | [M-H]-     | 457.33230 | 458.33961 | 0.090 |
| C30H50O3   | 4 | [M-H]-     | 457.36860 | 458.37600 | 0.275 |
| C29H54O2   | 1 | [M+Na]+    | 457.39980 | 434.41238 | 3.940 |
| C29H43NO2  | 1 | [M-2H+Na]- | 458.30350 | 437.32938 | 0.120 |
| C18H28O11  | 1 | [M+K]+     | 459.12470 | 420.16317 | 3.520 |
| C27H40O6   | 1 | [M-H]-     | 459.27540 | 460.28249 | 0.390 |
| C28H44O5   | 2 | [M-H]-     | 459.31180 | 460.31888 | 0.422 |
| C29H48O4   | 2 | [M-H]-     | 459.34810 | 460.35526 | 0.237 |
| C30H52O3   | 2 | [M-H]-     | 459.38440 | 460.39165 | 0.052 |
| C21H44NO6P | 1 | [M+Na]+    | 460.28000 | 437.29063 | 0.330 |
| C28H41NO3  | 1 | [M-2H+Na]- | 460.28290 | 439.30864 | 0.413 |
| C23H43O7P  | 1 | [M-H]-     | 461.26960 | 462.27464 | 4.828 |
| C27H42O6   | 1 | [M-H]-     | 461.29100 | 462.29814 | 0.280 |

|             |   |           |           |           |       |
|-------------|---|-----------|-----------|-----------|-------|
| C28H46O5    | 2 | [M-H]-    | 461.32720 | 462.33453 | 0.121 |
| C29H50O4    | 2 | [M-H]-    | 461.36350 | 462.37091 | 0.306 |
| C22H42NO7P  | 1 | [M-H]-    | 462.26230 | 463.26989 | 0.697 |
| C28H41NO3   | 1 | [M+Na]+   | 462.29800 | 439.30864 | 0.292 |
| C24H47NO7   | 1 | [M+H]+    | 462.34360 | 461.33526 | 2.325 |
| C20H41O7P   | 1 | [M+K]+    | 463.22010 | 424.25899 | 4.410 |
| C29H36O5    | 1 | [M-H]-    | 463.24930 | 464.25628 | 0.635 |
| C25H41FO4   | 1 | [M+K]+    | 463.26340 | 424.29889 | 2.938 |
| C25H45O4P   | 1 | [M+Na]+   | 463.29340 | 440.30555 | 2.955 |
| C27H42O6    | 1 | [M+H]+    | 463.30340 | 462.29814 | 4.341 |
| C27H44O6    | 2 | [M-H]-    | 463.30680 | 464.31379 | 0.602 |
| C23H46N4O3  | 1 | [M-2H+K]- | 463.30680 | 426.35699 | 2.610 |
| C31H44O3    | 1 | [M-H]-    | 463.32200 | 464.32905 | 0.483 |
| C28H48O5    | 2 | [M-H]-    | 463.34310 | 464.35018 | 0.419 |
| C31H60O2    | 2 | [M-H]-    | 463.45220 | 464.45933 | 0.300 |
| C22H44NO7P  | 1 | [M-H]-    | 464.27810 | 465.28554 | 0.370 |
| C26H39N3O3  | 1 | [M+Na]+   | 464.28740 | 441.29914 | 2.074 |
| C28H39N3O3  | 1 | [M-H]-    | 464.29330 | 465.29914 | 3.076 |
| C23H48NO6P  | 2 | [M-H]-    | 464.31340 | 465.32193 | 2.707 |
| C25H49NO4   | 1 | [M-2H+K]- | 464.31340 | 427.36616 | 2.929 |
| C21H30O8S   | 1 | [M+Na]+   | 465.15670 | 442.16614 | 2.872 |
| C23H40O7    | 1 | [M-2H+K]- | 465.22820 | 428.27741 | 4.716 |
| C29H38O5    | 1 | [M-H]-    | 465.26490 | 466.27193 | 0.524 |
| C23H45O7P   | 1 | [M+H]+    | 465.29670 | 464.29029 | 1.855 |
| C28H42O4    | 1 | [M+Na]+   | 465.29670 | 442.30831 | 1.788 |
| C28H41F3O2  | 1 | [M-H]-    | 465.30080 | 466.30587 | 4.737 |
| C23H47O7P   | 1 | [M-H]-    | 465.30080 | 466.30594 | 4.571 |
| C27H46O6    | 2 | [M-H]-    | 465.32200 | 466.32944 | 0.367 |
| C31H44O3    | 1 | [M+H]+    | 465.33460 | 464.32905 | 3.688 |
| C29H46O3    | 1 | [M+Na]+   | 465.33460 | 442.34470 | 1.468 |
| C31H46O3    | 2 | [M-H]-    | 465.33730 | 466.34470 | 0.271 |
| C23H49N2O5P | 1 | [M+H]+    | 465.34290 | 464.33791 | 4.902 |
| C28H50O5    | 2 | [M-H]-    | 465.35840 | 466.36583 | 0.335 |
| C31H54O     | 1 | [M+Na]+   | 465.40900 | 442.41747 | 4.970 |
| C31H62O2    | 2 | [M-H]-    | 465.46810 | 466.47498 | 0.836 |
| C27H43NO3   | 1 | [M-2H+K]- | 466.27230 | 429.32429 | 1.274 |
| C25H32O7    | 1 | [M+Na]+   | 467.20510 | 444.21481 | 2.297 |
| C21H41O9P   | 1 | [M-H]-    | 467.24350 | 468.24882 | 4.167 |
| C23H41O6P   | 1 | [M+Na]+   | 467.25460 | 444.26408 | 2.784 |
| C27H40O5    | 1 | [M+Na]+   | 467.27670 | 444.28758 | 0.208 |
| C29H38O5    | 1 | [M+H]+    | 467.28020 | 466.27193 | 2.149 |
| C28H41F3O2  | 1 | [M+H]+    | 467.31420 | 466.30587 | 2.277 |
| C28H44O4    | 1 | [M+Na]+   | 467.31420 | 444.32396 | 2.178 |
| C23H47O7P   | 1 | [M+H]+    | 467.31420 | 466.30594 | 2.112 |
| C30H44O4    | 2 | [M-H]-    | 467.31670 | 468.32396 | 0.019 |
| C27H48O6    | 1 | [M-H]-    | 467.33820 | 468.34509 | 0.811 |
| C31H48O3    | 2 | [M-H]-    | 467.35300 | 468.36035 | 0.163 |
| C31H46O3    | 1 | [M+H]+    | 467.35350 | 466.34470 | 3.282 |
| C28H50O5    | 3 | [M+H]+    | 467.37360 | 466.36583 | 1.078 |

|             |   |            |           |           |       |
|-------------|---|------------|-----------|-----------|-------|
| C32H52O2    | 2 | [M-H]-     | 467.38970 | 468.39673 | 0.511 |
| C27H45NO3   | 1 | [M-2H+K]-  | 468.28850 | 431.33994 | 0.094 |
| C24H30O8    | 1 | [M+Na]+    | 469.18360 | 446.19407 | 0.656 |
| C29H42O5    | 2 | [M-H]-     | 469.29590 | 470.30323 | 0.119 |
| C22H47O8P   | 1 | [M-H]-     | 469.29590 | 470.30086 | 4.927 |
| C30H44O4    | 1 | [M+H]+     | 469.32930 | 468.32396 | 4.114 |
| C28H46O4    | 1 | [M+Na]+    | 469.32930 | 446.33961 | 0.997 |
| C30H46O4    | 4 | [M-H]-     | 469.33220 | 470.33961 | 0.300 |
| C27H48O6    | 1 | [M+H]+     | 469.35250 | 468.34509 | 0.296 |
| C31H50O3    | 4 | [M-H]-     | 469.36850 | 470.37600 | 0.481 |
| C32H54O2    | 4 | [M-H]-     | 469.40490 | 470.41238 | 0.450 |
| C31H58      | 1 | [M+K]+     | 469.41500 | 430.45385 | 4.263 |
| C26H43NO4   | 1 | [M-2H+K]-  | 470.26780 | 433.31921 | 0.019 |
| C22H47N2O5P | 2 | [M-2H+Na]- | 471.29700 | 450.32226 | 1.428 |
| C30H48O4    | 2 | [M-H]-     | 471.34790 | 472.35526 | 0.193 |
| C31H52O3    | 2 | [M-H]-     | 471.38440 | 472.39165 | 0.051 |
| C32H56O2    | 1 | [M-H]-     | 471.42080 | 472.42803 | 0.083 |
| C22H46NO6P  | 1 | [M-2H+Na]- | 472.28270 | 451.30628 | 4.991 |
| C21H39O7P   | 1 | [M+K]+     | 473.20880 | 434.24334 | 4.875 |
| C27H42F2O3  | 4 | [M-2H+Na]- | 473.28290 | 452.31020 | 2.893 |
| C27H42F2O3  | 4 | [M-2H+Na]- | 473.28370 | 452.31020 | 1.202 |
| C27H42F2O3  | 4 | [M-2H+Na]- | 473.28440 | 452.31020 | 0.277 |
| C27H48O4    | 2 | [M-2H+K]-  | 473.30590 | 436.35526 | 4.308 |
| C32H42O3    | 1 | [M-H]-     | 473.30590 | 474.31340 | 0.477 |
| C29H46O5    | 2 | [M-H]-     | 473.32730 | 474.33453 | 0.093 |
| C30H50O4    | 2 | [M-H]-     | 473.36380 | 474.37091 | 0.336 |
| C23H40NO7P  | 1 | [M+H]+     | 474.25940 | 473.25424 | 4.453 |
| C21H42NO7P  | 1 | [M+Na]+    | 474.25940 | 451.26989 | 0.605 |
| C23H42NO7P  | 1 | [M-H]-     | 474.26290 | 475.26989 | 0.586 |
| C31H41NO3   | 1 | [M-H]-     | 474.29920 | 475.30864 | 4.584 |
| C24H42O7S   | 1 | [M+H]+     | 475.27370 | 474.26513 | 2.739 |
| C26H46O5    | 2 | [M-2H+K]-  | 475.28520 | 438.33453 | 4.364 |
| C27H42F2O3  | 1 | [M+Na]+    | 475.29810 | 452.31020 | 2.786 |
| C28H44O6    | 2 | [M-H]-     | 475.30640 | 476.31379 | 0.255 |
| C30H46O3    | 4 | [M-2H+Na]- | 475.32100 | 454.34470 | 4.708 |
| C32H44O3    | 1 | [M-H]-     | 475.32100 | 476.32905 | 1.633 |
| C29H48O5    | 2 | [M-H]-     | 475.34240 | 476.35018 | 1.064 |
| C20H23O9S   | 4 | [M-2H+K]-  | 476.05290 | 439.10630 | 4.201 |
| C20H23O9S   | 4 | [M-2H+K]-  | 476.05470 | 439.10630 | 0.420 |
| C20H23O9S   | 4 | [M-2H+K]-  | 476.05480 | 439.10630 | 0.210 |
| C20H21O10S  | 1 | [M+Na]+    | 476.07380 | 453.08550 | 1.935 |
| C23H42NO7P  | 1 | [M+H]+     | 476.27500 | 475.26989 | 4.539 |
| C28H41NO4   | 1 | [M-2H+Na]- | 476.27810 | 455.30356 | 0.997 |
| C23H44NO7P  | 1 | [M-H]-     | 476.27810 | 477.28554 | 0.361 |
| C29H50O5    | 2 | [M-H]-     | 477.35860 | 478.36583 | 0.092 |
| C28H56O3    | 1 | [M-2H+K]-  | 477.37380 | 440.42295 | 4.722 |
| C32H62O2    | 2 | [M-H]-     | 477.46750 | 478.47498 | 0.442 |
| C34H68      | 1 | [M+H]+     | 477.54070 | 476.53210 | 2.783 |
| C20H42NO7P  | 1 | [M+K]+     | 478.23150 | 439.26989 | 3.224 |

|             |   |            |           |           |       |
|-------------|---|------------|-----------|-----------|-------|
| C27H39NO5   | 1 | [M-2H+Na]- | 478.25720 | 457.28282 | 0.648 |
| C23H46NO7P  | 1 | [M-H]-     | 478.29390 | 479.30119 | 0.046 |
| C30H51NO2   | 2 | [M-2H+Na]- | 478.36620 | 457.39198 | 0.322 |
| C23H39O7P   | 1 | [M-2H+Na]- | 479.21750 | 458.24334 | 0.190 |
| C29H36O6    | 1 | [M-H]-     | 479.24390 | 480.25119 | 0.044 |
| C23H45O8P   | 1 | [M-H]-     | 479.28020 | 480.28521 | 4.720 |
| C24H49O7P   | 1 | [M-H]-     | 479.31660 | 480.32159 | 4.751 |
| C31H44O4    | 1 | [M-H]-     | 479.31660 | 480.32396 | 0.190 |
| C28H48O6    | 1 | [M-H]-     | 479.33780 | 480.34509 | 0.044 |
| C32H48O3    | 1 | [M-H]-     | 479.35310 | 480.36035 | 0.050 |
| C32H62O2    | 1 | [M+H]+     | 479.48250 | 478.47498 | 0.519 |
| C32H64O2    | 2 | [M-H]-     | 479.48330 | 480.49063 | 0.127 |
| C22H44NO8P  | 1 | [M-H]-     | 480.27350 | 481.28046 | 0.652 |
| C23H46NO7P  | 1 | [M+H]+     | 480.30850 | 479.30119 | 0.079 |
| C25H36O9    | 1 | [M+H]+     | 481.24520 | 480.23594 | 4.143 |
| C30H42O3S   | 1 | [M-H]-     | 481.27820 | 482.28547 | 0.004 |
| C32H50O3    | 1 | [M-H]-     | 481.36860 | 482.37600 | 0.262 |
| C30H58O4    | 2 | [M-H]-     | 481.42610 | 482.43351 | 0.293 |
| C22H25O10S  | 1 | [M+H]+     | 482.12560 | 481.11680 | 3.173 |
| C27H43NO4   | 2 | [M-2H+K]-  | 482.26730 | 445.31921 | 1.055 |
| C24H52NO6P  | 1 | [M+H]+     | 482.35980 | 481.35323 | 1.445 |
| C30H59NO3   | 1 | [M+H]+     | 482.45460 | 481.44950 | 4.487 |
| C23H41O7P   | 1 | [M+Na]+    | 483.24580 | 460.25899 | 4.995 |
| C28H44O5    | 1 | [M+Na]+    | 483.30630 | 460.31888 | 3.718 |
| C30H44O5    | 1 | [M-H]-     | 483.31150 | 484.31888 | 0.219 |
| C31H48O4    | 2 | [M-H]-     | 483.34780 | 484.35526 | 0.395 |
| C27H45NO4   | 1 | [M-2H+K]-  | 484.28230 | 447.33486 | 2.393 |
| C26H45NO5S  | 1 | [M+H]+     | 484.31080 | 483.30185 | 3.475 |
| C28H38O7    | 1 | [M-H]-     | 485.25460 | 486.26176 | 0.235 |
| C27H42O5    | 1 | [M+K]+     | 485.26510 | 446.30323 | 2.629 |
| C23H43O7P   | 1 | [M+Na]+    | 485.26510 | 462.27464 | 2.547 |
| C29H42O6    | 1 | [M-H]-     | 485.29080 | 486.29814 | 0.146 |
| C31H48O4    | 1 | [M+H]+     | 485.36130 | 484.35526 | 2.536 |
| C29H50O4    | 1 | [M+Na]+    | 485.36130 | 462.37091 | 2.406 |
| C31H50O4    | 2 | [M-H]-     | 485.36360 | 486.37091 | 0.084 |
| C32H54O3    | 4 | [M-H]-     | 485.39960 | 486.40730 | 0.878 |
| C33H58O2    | 2 | [M-H]-     | 485.43620 | 486.44368 | 0.435 |
| C25H46NO6P  | 1 | [M-H]-     | 486.29850 | 487.30628 | 1.043 |
| C25H36O8    | 1 | [M+Na]+    | 487.23170 | 464.24102 | 2.992 |
| C22H47N2O5P | 2 | [M-2H+K]-  | 487.27000 | 450.32226 | 1.767 |
| C28H40O7    | 1 | [M-H]-     | 487.27000 | 488.27741 | 0.279 |
| C30H48O5    | 4 | [M-H]-     | 487.34260 | 488.35018 | 0.628 |
| C31H52O4    | 2 | [M-H]-     | 487.37910 | 488.38656 | 0.392 |
| C25H46NO6P  | 1 | [M+H]+     | 488.31480 | 487.30628 | 2.566 |
| C27H42F2O3  | 4 | [M-2H+K]-  | 489.25970 | 452.31020 | 1.833 |
| C27H39F3O3  | 1 | [M-2H+Na]- | 489.25970 | 468.28513 | 1.028 |
| C22H45O8P   | 1 | [M-2H+Na]- | 489.25970 | 468.28521 | 0.871 |
| C22H47N2O5P | 1 | [M+K]+     | 489.28300 | 450.32226 | 4.928 |
| C28H40O7    | 1 | [M+H]+     | 489.28300 | 488.27741 | 3.425 |

|             |   |            |           |           |       |
|-------------|---|------------|-----------|-----------|-------|
| C28H42O7    | 1 | [M-H]-     | 489.28630 | 490.29306 | 1.051 |
| C27H48O5    | 2 | [M-2H+K]-  | 489.30110 | 452.35018 | 4.750 |
| C29H46O6    | 2 | [M-H]-     | 489.32240 | 490.32944 | 0.468 |
| C23H51N2O5P | 1 | [M+Na]+    | 489.34060 | 466.35356 | 4.459 |
| C30H50O5    | 2 | [M-H]-     | 489.35850 | 490.36583 | 0.114 |
| C31H54O4    | 2 | [M-H]-     | 489.39500 | 490.40221 | 0.121 |
| C20H21O10S  | 5 | [M-2H+K]-  | 490.03180 | 453.08550 | 4.694 |
| C20H21O10S  | 5 | [M-2H+K]-  | 490.03240 | 453.08550 | 3.469 |
| C20H21O10S  | 5 | [M-2H+K]-  | 490.03260 | 453.08550 | 3.061 |
| C20H21O10S  | 5 | [M-2H+K]-  | 490.03390 | 453.08550 | 0.408 |
| C20H21O10S  | 5 | [M-2H+K]-  | 490.03460 | 453.08550 | 1.020 |
| C25H40O8    | 1 | [M+Na]+    | 491.26130 | 468.27232 | 0.493 |
| C26H46O6    | 3 | [M-2H+K]-  | 491.27880 | 454.32944 | 1.545 |
| C29H42O5    | 2 | [M-2H+Na]- | 491.27880 | 470.30323 | 3.070 |
| C25H49O7P   | 1 | [M-H]-     | 491.31660 | 492.32159 | 4.635 |
| C31H50O3    | 4 | [M-2H+Na]- | 491.35230 | 470.37600 | 4.555 |
| C33H48O3    | 1 | [M-H]-     | 491.35230 | 492.36035 | 1.579 |
| C30H50O5    | 1 | [M+H]+     | 491.37100 | 490.36583 | 4.266 |
| C30H52O5    | 2 | [M-H]-     | 491.37400 | 492.38148 | 0.419 |
| C32H52O2    | 1 | [M+Na]+    | 491.38370 | 468.39673 | 4.583 |
| C32H54O2    | 4 | [M-2H+Na]- | 491.38870 | 470.41238 | 4.585 |
| C30H60O3    | 1 | [M+Na]+    | 491.44210 | 468.45425 | 2.782 |
| C31H64O     | 1 | [M+K]+     | 491.46030 | 452.49572 | 2.918 |
| C33H64O2    | 2 | [M-H]-     | 491.48310 | 492.49063 | 0.531 |
| C20H23O10S  | 4 | [M-2H+K]-  | 492.04890 | 455.10110 | 1.626 |
| C20H23O10S  | 4 | [M-2H+K]-  | 492.05080 | 455.10110 | 2.236 |
| C20H23O10S  | 4 | [M-2H+K]-  | 492.05110 | 455.10110 | 2.845 |
| C28H40O5    | 2 | [M-2H+K]-  | 493.23400 | 456.28758 | 4.412 |
| C24H41O7P   | 1 | [M-2H+Na]- | 493.23400 | 472.25899 | 1.908 |
| C23H43O9P   | 1 | [M-H]-     | 493.25950 | 494.26447 | 4.657 |
| C31H42O5    | 1 | [M-H]-     | 493.29630 | 494.30323 | 0.697 |
| C32H46O4    | 1 | [M-H]-     | 493.33260 | 494.33961 | 0.525 |
| C30H52O5    | 2 | [M+H]+     | 493.38960 | 492.38148 | 1.731 |
| C33H66O2    | 2 | [M-H]-     | 493.49910 | 494.50628 | 0.180 |
| C30H51NO2   | 2 | [M-2H+K]-  | 494.34040 | 457.39198 | 0.364 |
| C23H45O9P   | 1 | [M-H]-     | 495.27510 | 496.28012 | 4.537 |
| C24H49O8P   | 1 | [M-H]-     | 495.31160 | 496.31651 | 4.769 |
| C32H56O2    | 1 | [M+Na]+    | 495.41580 | 472.42803 | 2.931 |
| C34H56O2    | 1 | [M-H]-     | 495.42070 | 496.42803 | 0.123 |
| C34H70O     | 1 | [M+H]+     | 495.55140 | 494.54267 | 2.954 |
| C23H40NO7P  | 1 | [M+Na]+    | 496.24200 | 473.25424 | 2.948 |
| C24H50NO7P  | 1 | [M+H]+     | 496.34080 | 495.33249 | 2.091 |
| C25H54NO6P  | 1 | [M+H]+     | 496.37670 | 495.36888 | 1.114 |
| C26H38N2O3S | 1 | [M+K]+     | 497.22510 | 458.26032 | 3.286 |
| C22H43O10P  | 1 | [M-H]-     | 497.25450 | 498.25939 | 4.790 |
| C25H40N2O6S | 1 | [M+H]+     | 497.26940 | 496.26071 | 2.854 |
| C23H47O9P   | 1 | [M-H]-     | 497.29070 | 498.29577 | 4.418 |
| C30H42O6    | 1 | [M-H]-     | 497.29070 | 498.29814 | 0.344 |
| C24H51O8P   | 1 | [M-H]-     | 497.32720 | 498.33216 | 4.649 |



|             |   |            |           |           |       |
|-------------|---|------------|-----------|-----------|-------|
| C30H5004    | 1 | [M+Na]+    | 497.36050 | 474.37091 | 0.740 |
| C32H5004    | 1 | [M-H]-     | 497.36360 | 498.37091 | 0.082 |
| C34H58O2    | 1 | [M-H]-     | 497.43640 | 498.44368 | 0.022 |
| C23H42NO7P  | 1 | [M+Na]+    | 498.25740 | 475.26989 | 3.438 |
| C22H44NO9P  | 2 | [M+H]+     | 498.28300 | 497.27537 | 0.718 |
| C24H48NO6P  | 1 | [M-2H+Na]- | 498.29790 | 477.32193 | 3.827 |
| C20H32Br2O2 | 5 | [M-2H+K]-  | 499.02410 | 462.07690 | 2.805 |
| C20H32Br2O2 | 5 | [M-2H+K]-  | 499.02420 | 462.07690 | 2.605 |
| C20H32Br2O2 | 5 | [M-2H+K]-  | 499.02670 | 462.07690 | 2.405 |
| C20H32Br2O2 | 5 | [M-2H+K]-  | 499.02680 | 462.07690 | 2.605 |
| C20H32Br2O2 | 5 | [M-2H+K]-  | 499.02710 | 462.07690 | 3.206 |
| C15H29O10P3 | 2 | [M-2H+K]-  | 499.04830 | 462.09736 | 4.683 |
| C24H34O11   | 1 | [M+H]+     | 499.21740 | 498.21012 | 0.028 |
| C25H5007    | 1 | [M-2H+K]-  | 499.30630 | 462.35566 | 4.094 |
| C30H44O6    | 1 | [M-H]-     | 499.30630 | 500.31379 | 0.443 |
| C33H56O3    | 2 | [M-H]-     | 499.41550 | 500.42295 | 0.352 |
| C34H60O2    | 1 | [M-H]-     | 499.45180 | 500.45933 | 0.523 |
| C24H50NO6P  | 1 | [M-2H+Na]- | 500.31410 | 479.33758 | 4.911 |
| C20H32Br2O2 | 4 | [M+K]+     | 501.04220 | 462.07690 | 4.291 |
| C15H29O10P3 | 4 | [M+K]+     | 501.05880 | 462.09736 | 3.419 |
| C28H46O3S   | 1 | [M+K]+     | 501.27970 | 462.31677 | 0.435 |
| C23H49N2O5P | 1 | [M-2H+K]-  | 501.28580 | 464.33791 | 1.418 |
| C28H46O5    | 1 | [M+K]+     | 501.29950 | 462.33453 | 3.639 |
| C28H46O4S   | 1 | [M+Na]+    | 501.29950 | 478.31168 | 2.801 |
| C29H50O5    | 1 | [M+Na]+    | 501.35570 | 478.36583 | 1.302 |
| C32H54O4    | 2 | [M-H]-     | 501.39490 | 502.40221 | 0.082 |
| C23H46NO7P  | 1 | [M+Na]+    | 502.29030 | 479.30119 | 0.225 |
| C23H51N2O5P | 1 | [M-2H+K]-  | 503.30140 | 466.35356 | 1.512 |
| C31H52O5    | 2 | [M-H]-     | 503.37450 | 504.38148 | 0.584 |
| C33H68      | 1 | [M+K]+     | 503.49290 | 464.53210 | 4.669 |
| C28H39N3O3  | 1 | [M+K]+     | 504.26070 | 465.29914 | 3.157 |
| C24H41O9P   | 1 | [M+H]+     | 505.25390 | 504.24882 | 4.340 |
| C27H34F6O2  | 1 | [M+H]+     | 505.25390 | 504.24630 | 0.649 |
| C22H43O9P   | 1 | [M+Na]+    | 505.25390 | 482.26447 | 0.408 |
| C32H50O3    | 1 | [M+Na]+    | 505.36400 | 482.37600 | 2.408 |
| C31H54O5    | 2 | [M-H]-     | 505.38990 | 506.39713 | 0.087 |
| C30H60O3    | 1 | [M-2H+K]-  | 505.40440 | 468.45425 | 3.075 |
| C31H62O3    | 1 | [M+Na]+    | 505.45690 | 482.46990 | 4.386 |
| C34H66O2    | 2 | [M-H]-     | 505.49890 | 506.50628 | 0.220 |
| C26H52NO6P  | 1 | [M+H]+     | 506.35820 | 505.35323 | 4.536 |
| C29H46O7    | 4 | [M+H]+     | 507.32950 | 506.32436 | 4.191 |
| C27H48O7    | 4 | [M+Na]+    | 507.32950 | 484.34001 | 0.538 |
| C30H52O6    | 2 | [M-H]-     | 507.36880 | 508.37639 | 0.633 |
| C34H68O2    | 2 | [M-H]-     | 507.51460 | 508.52193 | 0.120 |
| C21H25O10S  | 1 | [M+K]+     | 508.08100 | 469.11680 | 2.067 |
| C26H54NO6P  | 1 | [M+H]+     | 508.37720 | 507.36888 | 2.071 |
| C29H42O6    | 1 | [M+Na]+    | 509.28800 | 486.29814 | 1.253 |
| C24H45O9P   | 1 | [M+H]+     | 509.28800 | 508.28012 | 1.192 |
| C24H47O9P   | 1 | [M-H]-     | 509.29100 | 510.29577 | 4.903 |

|            |   |            |           |           |       |
|------------|---|------------|-----------|-----------|-------|
| C32H46O5   | 1 | [M-H]-     | 509.32680 | 510.33453 | 0.895 |
| C33H50O4   | 1 | [M-H]-     | 509.36320 | 510.37091 | 0.866 |
| C33H58O2   | 1 | [M+Na]+    | 509.43150 | 486.44368 | 2.752 |
| C24H49O9P  | 1 | [M-H]-     | 511.30640 | 512.31142 | 4.395 |
| C32H48O5   | 1 | [M-H]-     | 511.34250 | 512.35018 | 0.794 |
| C31H45NO5  | 1 | [M+H]+     | 512.33450 | 511.32977 | 4.965 |
| C24H50NO8P | 1 | [M+H]+     | 512.33450 | 511.32741 | 0.345 |
| C30H42O7   | 2 | [M-H]-     | 513.28490 | 514.29306 | 1.726 |
| C30H40O7   | 1 | [M+H]+     | 513.28710 | 512.27741 | 4.723 |
| C26H52O7   | 1 | [M-2H+K]-  | 513.32160 | 476.37131 | 3.300 |
| C28H44O6   | 1 | [M+K]+     | 515.27550 | 476.31379 | 2.797 |
| C30H44O7   | 1 | [M-H]-     | 515.30140 | 516.30871 | 0.070 |
| C26H52O7   | 1 | [M+K]+     | 515.33450 | 476.37131 | 0.085 |
| C31H48O6   | 1 | [M-H]-     | 515.33770 | 516.34509 | 0.235 |
| C33H56O4   | 2 | [M-H]-     | 515.41060 | 516.41786 | 0.017 |
| C29H40O8   | 1 | [M+H]+     | 517.28050 | 516.27232 | 1.757 |
| C30H46O7   | 1 | [M-H]-     | 517.31720 | 518.32436 | 0.220 |
| C27H48O9   | 1 | [M+H]+     | 517.33770 | 516.32984 | 1.148 |
| C32H54O5   | 2 | [M-H]-     | 517.38960 | 518.39713 | 0.495 |
| C26H48NO7P | 1 | [M+H]+     | 518.32230 | 517.31684 | 3.496 |
| C25H44O7P2 | 3 | [M+H]+     | 519.26150 | 518.25623 | 3.854 |
| C29H44O8   | 1 | [M-H]-     | 519.29670 | 520.30362 | 0.672 |
| C30H46O7   | 1 | [M+H]+     | 519.33190 | 518.32436 | 0.528 |
| C27H50O9   | 1 | [M+H]+     | 519.35140 | 518.34550 | 2.638 |
| C30H58O4   | 2 | [M-2H+K]-  | 519.38390 | 482.43351 | 3.444 |
| C35H68O2   | 1 | [M-H]-     | 519.51430 | 520.52193 | 0.695 |
| C26H50NO7P | 1 | [M+H]+     | 520.33980 | 519.33249 | 0.073 |
| C31H63NO3  | 1 | [M+Na]+    | 520.46980 | 497.48080 | 0.415 |
| C34H50O4   | 1 | [M-H]-     | 521.36310 | 522.37091 | 1.038 |
| C30H58O4   | 1 | [M+K]+     | 521.39680 | 482.43351 | 0.267 |
| C33H56O3   | 2 | [M-2H+Na]- | 521.39940 | 500.42295 | 4.580 |
| C31H62O3   | 1 | [M+K]+     | 521.43080 | 482.46990 | 4.307 |
| C34H58O2   | 1 | [M+Na]+    | 521.43080 | 498.44368 | 4.031 |
| C35H70O2   | 1 | [M-H]-     | 521.52940 | 522.53758 | 1.747 |
| C30H44O6   | 1 | [M+Na]+    | 523.30390 | 500.31379 | 1.697 |
| C26H53O8P  | 1 | [M-H]-     | 523.34300 | 524.34781 | 4.704 |
| C34H50O4   | 1 | [M+H]+     | 523.37820 | 522.37091 | 0.036 |
| C36H60O2   | 2 | [M-H]-     | 523.45130 | 524.45933 | 1.454 |
| C26H54NO7P | 1 | [M+H]+     | 524.37070 | 523.36379 | 0.690 |
| C25H51O9P  | 1 | [M-H]-     | 525.32170 | 526.32707 | 3.611 |
| C26H53O8P  | 1 | [M+H]+     | 525.35640 | 524.34781 | 2.516 |
| C26H55O8P  | 1 | [M-H]-     | 525.35820 | 526.36346 | 3.828 |
| C32H54O4   | 1 | [M+Na]+    | 525.39250 | 502.40221 | 2.033 |
| C35H58O3   | 1 | [M-H]-     | 525.43130 | 526.43860 | 0.049 |
| C36H62O2   | 1 | [M-H]-     | 525.46740 | 526.47498 | 0.592 |
| C34H68O3   | 1 | [M+H]+     | 525.52330 | 524.51685 | 1.553 |
| C24H48NO9P | 1 | [M+H]+     | 526.31620 | 525.30667 | 4.290 |
| C35H60O3   | 1 | [M-H]-     | 527.44670 | 528.45425 | 0.523 |
| C34H66O2   | 2 | [M-2H+Na]- | 527.48290 | 506.50628 | 4.840 |

|             |   |            |           |           |       |
|-------------|---|------------|-----------|-----------|-------|
| C36H64O2    | 1 | [M-H]-     | 527.48290 | 528.49063 | 0.874 |
| C24H31O11S  | 1 | [M+H]+     | 528.16470 | 527.15871 | 2.429 |
| C24H43O9P   | 1 | [M+Na]+    | 529.25190 | 506.26447 | 3.390 |
| C27H36F6O2  | 1 | [M+Na]+    | 529.25190 | 506.26195 | 1.374 |
| C31H51FO3   | 1 | [M+K]+     | 529.34470 | 490.38222 | 1.273 |
| C32H50O6    | 1 | [M-H]-     | 529.35330 | 530.36074 | 0.323 |
| C35H60O3    | 3 | [M+H]+     | 529.46220 | 528.45425 | 1.292 |
| C35H62O3    | 1 | [M-H]-     | 529.46230 | 530.46990 | 0.616 |
| C22H43O12P  | 1 | [M+H]+     | 531.25840 | 530.24922 | 3.599 |
| C30H42O8    | 1 | [M+H]+     | 531.29750 | 530.28797 | 4.252 |
| C34H60O4    | 2 | [M-H]-     | 531.44190 | 532.44916 | 0.017 |
| C25H52NO6P  | 1 | [M+K]+     | 532.31650 | 493.35323 | 0.231 |
| C25H51O7P   | 1 | [M+K]+     | 533.29880 | 494.33724 | 2.987 |
| C31H60O5    | 1 | [M-2H+Na]- | 533.42070 | 512.44408 | 4.795 |
| C33H66O3    | 1 | [M+Na]+    | 533.48780 | 510.50120 | 4.905 |
| C36H70O2    | 1 | [M-H]-     | 533.53000 | 534.53758 | 0.583 |
| C27H44O8    | 1 | [M+K]+     | 535.26860 | 496.30362 | 3.417 |
| C36H72O2    | 1 | [M-H]-     | 535.54520 | 536.55323 | 1.421 |
| C31H63NO3   | 2 | [M+K]+     | 536.44300 | 497.48080 | 1.762 |
| C27H35ClO9  | 1 | [M-H]-     | 537.19220 | 538.19696 | 4.665 |
| C26H45NO6S  | 1 | [M+K]+     | 538.25960 | 499.29676 | 0.580 |
| C28H60NO6P  | 1 | [M+H]+     | 538.42100 | 537.41583 | 3.895 |
| C32H54O5    | 2 | [M-2H+Na]- | 539.37370 | 518.39713 | 4.650 |
| C26H54NO8P  | 1 | [M+H]+     | 540.36770 | 539.35871 | 3.189 |
| C27H32F6O3  | 1 | [M+Na]+    | 541.21470 | 518.22557 | 0.163 |
| C27H37ClO9  | 1 | [M+H]+     | 541.22080 | 540.21261 | 1.692 |
| C35H58O4    | 1 | [M-H]-     | 541.42590 | 542.43351 | 0.630 |
| C28H48NO7P  | 1 | [M+H]+     | 542.32160 | 541.31684 | 4.632 |
| C33H52O6    | 1 | [M-H]-     | 543.36860 | 544.37639 | 0.959 |
| C35H60O4    | 1 | [M-H]-     | 543.44100 | 544.44916 | 1.640 |
| C27H38O9    | 1 | [M+K]+     | 545.21600 | 506.25159 | 2.318 |
| C33H54O6    | 1 | [M-H]-     | 545.38490 | 546.39204 | 0.237 |
| C35H62O4    | 2 | [M-H]-     | 545.45710 | 546.46481 | 0.808 |
| C35H60O4    | 3 | [M+H]+     | 545.45830 | 544.44916 | 3.426 |
| C26H43NO9S  | 1 | [M+H]+     | 546.27310 | 545.26586 | 0.049 |
| C28H52NO7P  | 1 | [M+H]+     | 546.35330 | 545.34814 | 3.866 |
| C29H48O7    | 1 | [M+K]+     | 547.30500 | 508.34001 | 3.369 |
| C32H50O7    | 1 | [M+H]+     | 547.36150 | 546.35566 | 2.605 |
| C35H62O4    | 6 | [M+H]+     | 547.47320 | 546.46481 | 2.044 |
| C37H72O2    | 1 | [M-H]-     | 547.54590 | 548.55323 | 0.111 |
| C25H51O9P   | 1 | [M+Na]+    | 549.31470 | 526.32707 | 2.902 |
| C36H62O2    | 1 | [M+Na]+    | 549.46570 | 526.47498 | 2.726 |
| C33H66O3    | 1 | [M+K]+     | 549.46570 | 510.50120 | 2.464 |
| C35H66O4    | 1 | [M-H]-     | 549.48870 | 550.49611 | 0.257 |
| C37H72O2    | 1 | [M+H]+     | 549.56040 | 548.55323 | 0.184 |
| C22H42NO10P | 1 | [M+K]+     | 550.21590 | 511.25464 | 3.430 |
| C27H52NO8P  | 1 | [M+H]+     | 550.35240 | 549.34306 | 3.767 |
| C32H65NO3   | 1 | [M+K]+     | 550.46230 | 511.49645 | 4.914 |
| C25H33ClO9  | 3 | [M+K]+     | 551.14390 | 512.18131 | 1.023 |

|            |   |            |           |           |       |
|------------|---|------------|-----------|-----------|-------|
| C24H32O11S | 1 | [M+Na]+    | 551.15820 | 528.16654 | 4.429 |
| C40H54O    | 1 | [M+H]+     | 551.42380 | 550.41747 | 1.697 |
| C35H66O4   | 6 | [M+H]+     | 551.50400 | 550.49611 | 1.122 |
| C28H52NO6P | 1 | [M+Na]+    | 552.34190 | 529.35323 | 0.992 |
| C29H62NO6P | 1 | [M+H]+     | 552.43850 | 551.43148 | 0.447 |
| C27H55O9P  | 1 | [M-H]-     | 553.35260 | 554.35837 | 2.704 |
| C40H50     | 1 | [M+Na]+    | 553.37950 | 530.39125 | 1.756 |
| C34H60O4   | 2 | [M-2H+Na]- | 553.42580 | 532.44916 | 4.649 |
| C35H62O3   | 4 | [M+Na]+    | 553.45920 | 530.46990 | 0.150 |
| C26H52NO9P | 1 | [M+H]+     | 554.34430 | 553.33797 | 1.699 |
| C40H52     | 1 | [M+Na]+    | 555.39740 | 532.40690 | 2.301 |
| C34H60O4   | 1 | [M+Na]+    | 555.43900 | 532.44916 | 1.113 |
| C28H38F6O2 | 1 | [M+K]+     | 559.23970 | 520.27760 | 1.881 |
| C29H44O9   | 1 | [M+Na]+    | 559.28870 | 536.29854 | 1.686 |
| C24H47O12P | 1 | [M+H]+     | 559.28870 | 558.28052 | 1.631 |
| C36H64O4   | 2 | [M-H]-     | 559.47280 | 560.48046 | 0.699 |
| C37H68O3   | 1 | [M-H]-     | 559.50850 | 560.51685 | 1.923 |
| C36H72O2   | 1 | [M+Na]+    | 559.54040 | 536.55323 | 3.667 |
| C27H35ClO9 | 2 | [M+Na]+    | 561.18700 | 538.19696 | 1.452 |
| C35H62O5   | 2 | [M-H]-     | 561.45260 | 562.45973 | 0.256 |
| C36H64O4   | 6 | [M+H]+     | 561.48860 | 560.48046 | 1.548 |
| C37H68O3   | 1 | [M+H]+     | 561.52590 | 560.51685 | 3.177 |
| C38H74O2   | 1 | [M-H]-     | 561.56130 | 562.56888 | 0.554 |
| C28H54NO8P | 1 | [M-H]-     | 562.35100 | 563.35871 | 0.777 |
| C33H65NO3  | 1 | [M+K]+     | 562.45960 | 523.49645 | 0.009 |
| C35H63NO4  | 1 | [M+H]+     | 562.48570 | 561.47571 | 4.836 |
| C34H69NO3  | 1 | [M+Na]+    | 562.51830 | 539.52775 | 2.371 |
| C36H67NO3  | 1 | [M+H]+     | 562.51830 | 561.51210 | 1.893 |
| C27H38F6O3 | 1 | [M+K]+     | 563.23770 | 524.27252 | 3.610 |
| C35H62O5   | 1 | [M+H]+     | 563.46780 | 562.45973 | 1.427 |
| C28H56NO8P | 1 | [M-H]-     | 564.36700 | 565.37436 | 0.154 |
| C33H67NO3  | 1 | [M+K]+     | 564.47500 | 525.51210 | 0.434 |
| C40H62     | 1 | [M+Na]+    | 565.47300 | 542.48515 | 2.426 |
| C35H64O5   | 1 | [M+H]+     | 565.48320 | 564.47538 | 0.980 |
| C26H42NO9P | 1 | [M+Na]+    | 566.25170 | 543.25972 | 4.869 |
| C29H60NO7P | 1 | [M+H]+     | 566.41700 | 565.41074 | 1.787 |
| C24H32O12S | 1 | [M+Na]+    | 567.15350 | 544.16145 | 4.983 |
| C35H60O4   | 2 | [M+Na]+    | 567.44010 | 544.44916 | 3.028 |
| C26H43NO8S | 2 | [M+K]+     | 568.23450 | 529.27094 | 0.718 |
| C30H50NO7P | 1 | [M+H]+     | 568.34180 | 567.33249 | 3.586 |
| C33H54O6   | 1 | [M+Na]+    | 569.38210 | 546.39204 | 1.472 |
| C28H57O9P  | 1 | [M+H]+     | 569.38210 | 568.37402 | 1.416 |
| C33H56O6   | 1 | [M-2H+Na]- | 569.38450 | 548.40769 | 4.818 |
| C40H56O2   | 1 | [M+H]+     | 569.43320 | 568.42803 | 3.690 |
| C38H58O2   | 1 | [M+Na]+    | 569.43320 | 546.44368 | 0.523 |
| C39H68O2   | 1 | [M+H]+     | 569.53100 | 568.52193 | 3.159 |
| C27H50NO7P | 1 | [M+K]+     | 570.29330 | 531.33249 | 4.107 |
| C35H71NO4  | 1 | [M+H]+     | 570.54600 | 569.53831 | 0.736 |
| C30H44O8   | 1 | [M+K]+     | 571.26670 | 532.30362 | 0.124 |

|             |   |            |           |           |       |
|-------------|---|------------|-----------|-----------|-------|
| C27H48O8S   | 1 | [M+K]+     | 571.27210 | 532.30699 | 3.426 |
| C25H47O12P  | 1 | [M+H]+     | 571.28710 | 570.28052 | 1.204 |
| C34H52O7    | 1 | [M-H]-     | 571.36400 | 572.37131 | 0.063 |
| C40H52O     | 1 | [M+Na]+    | 571.38910 | 548.40182 | 3.390 |
| C33H56O6    | 1 | [M+Na]+    | 571.39840 | 548.40769 | 2.604 |
| C26H48NO9P  | 1 | [M+Na]+    | 572.29590 | 549.30667 | 0.012 |
| C30H46O8    | 1 | [M+K]+     | 573.28520 | 534.31927 | 4.848 |
| C28H48NO9P  | 1 | [M+H]+     | 574.31210 | 573.30667 | 3.207 |
| C26H50NO9P  | 1 | [M+Na]+    | 574.31210 | 551.32232 | 0.970 |
| C32H63NO5S  | 1 | [M+H]+     | 574.45240 | 573.44270 | 4.235 |
| C29H44O10   | 1 | [M+Na]+    | 575.28470 | 552.29345 | 3.525 |
| C36H64O5    | 2 | [M-H]-     | 575.46830 | 576.47538 | 0.337 |
| C38H64O2    | 1 | [M+Na]+    | 575.47870 | 552.49063 | 2.002 |
| C36H72O2    | 1 | [M+K]+     | 575.51480 | 536.55323 | 2.747 |
| C33H52O8    | 1 | [M+H]+     | 577.37170 | 576.36622 | 3.102 |
| C33H62O6    | 1 | [M+Na]+    | 577.44120 | 554.45464 | 4.610 |
| C36H66O5    | 2 | [M-H]-     | 577.48300 | 578.49103 | 1.309 |
| C39H76O2    | 1 | [M+H]+     | 577.59190 | 576.58453 | 0.171 |
| C28H54NO9P  | 1 | [M-H]-     | 578.34650 | 579.35362 | 0.256 |
| C29H58NO8P  | 1 | [M-H]-     | 578.38310 | 579.39001 | 0.628 |
| C35H63NO5   | 1 | [M+H]+     | 578.47570 | 577.47063 | 3.794 |
| C34H69NO4   | 1 | [M+Na]+    | 578.51020 | 555.52266 | 2.906 |
| C25H32O14   | 1 | [M+Na]+    | 579.16990 | 556.17921 | 2.535 |
| C27H37ClO10 | 1 | [M+Na]+    | 579.19780 | 556.20753 | 1.813 |
| C26H36O13   | 1 | [M+Na]+    | 579.20670 | 556.21560 | 3.251 |
| C32H44O8    | 1 | [M+Na]+    | 579.29550 | 556.30362 | 4.588 |
| C33H54O8    | 1 | [M+H]+     | 579.38770 | 578.38187 | 2.487 |
| C38H68O2    | 1 | [M+Na]+    | 579.51230 | 556.52193 | 1.981 |
| C25H34O13   | 1 | [M+K]+     | 581.16160 | 542.19995 | 2.574 |
| C28H50NO7P  | 1 | [M+K]+     | 582.29750 | 543.33249 | 3.191 |
| C24H32O12S  | 1 | [M+K]+     | 583.12210 | 544.16145 | 4.292 |
| C36H54O6    | 1 | [M+H]+     | 583.39880 | 582.39204 | 0.876 |
| C30H48O11   | 1 | [M+H]+     | 585.32650 | 584.31967 | 0.745 |
| C27H53O11P  | 1 | [M+H]+     | 585.33700 | 584.33255 | 4.825 |
| C29H55O8P   | 1 | [M+Na]+    | 585.35150 | 562.36346 | 2.016 |
| C36H50O5    | 1 | [M+Na]+    | 585.35570 | 562.36583 | 1.116 |
| C33H54O7    | 1 | [M+Na]+    | 585.37670 | 562.38696 | 0.893 |
| C40H56O3    | 1 | [M+H]+     | 585.42850 | 584.42295 | 2.931 |
| C35H62O5    | 2 | [M+Na]+    | 585.44870 | 562.45973 | 0.422 |
| C35H64O5    | 1 | [M-2H+Na]- | 585.45220 | 564.47538 | 4.711 |
| C41H60O2    | 1 | [M+H]+     | 585.46680 | 584.45933 | 0.340 |
| C38H74O2    | 1 | [M+Na]+    | 585.55680 | 562.56888 | 2.224 |
| C28H54NO8P  | 1 | [M+Na]+    | 586.34860 | 563.35871 | 1.146 |
| C29H58NO7P  | 1 | [M+Na]+    | 586.38360 | 563.39509 | 1.216 |
| C29H47O10P  | 1 | [M+H]+     | 587.30050 | 586.29069 | 4.328 |
| C28H53O9P   | 3 | [M+Na]+    | 587.33280 | 564.34272 | 1.457 |
| C40H58O3    | 1 | [M+H]+     | 587.44480 | 586.43860 | 1.815 |
| C35H64O5    | 1 | [M+Na]+    | 587.46560 | 564.47538 | 1.707 |
| C37H64O5    | 2 | [M-H]-     | 587.46860 | 588.47538 | 0.841 |

|             |   |            |           |           |       |
|-------------|---|------------|-----------|-----------|-------|
| C38H76O2    | 4 | [M+Na]+    | 587.57220 | 564.58453 | 2.641 |
| C28H55O8P   | 1 | [M+K]+     | 589.32750 | 550.36346 | 1.512 |
| C28H55O9P   | 1 | [M+Na]+    | 589.35000 | 566.35837 | 4.081 |
| C34H52O8    | 1 | [M+H]+     | 589.37230 | 588.36622 | 2.021 |
| C37H64O5    | 5 | [M+H]+     | 589.48100 | 588.47538 | 2.792 |
| C35H66O5    | 5 | [M+Na]+    | 589.48100 | 566.49103 | 1.277 |
| C35H69NO3   | 1 | [M+K]+     | 590.48820 | 551.52775 | 4.564 |
| C32H63O7P   | 1 | [M+H]+     | 591.43690 | 590.43114 | 2.560 |
| C37H66O5    | 1 | [M+H]+     | 591.49590 | 590.49103 | 4.051 |
| C35H68O5    | 1 | [M+Na]+    | 591.49590 | 568.50668 | 0.005 |
| C29H56NO9P  | 1 | [M-H]-     | 592.36210 | 593.36927 | 0.165 |
| C30H58NO8P  | 4 | [M+H]+     | 592.39820 | 591.39001 | 1.558 |
| C38H73NO3   | 1 | [M+H]+     | 592.56650 | 591.55905 | 0.312 |
| C27H45O12P  | 1 | [M+H]+     | 593.27320 | 592.26487 | 1.790 |
| C27H55O9P   | 1 | [M+K]+     | 593.32330 | 554.35837 | 2.993 |
| C33H52O9    | 1 | [M+H]+     | 593.36600 | 592.36114 | 4.055 |
| C34H56O8    | 2 | [M+H]+     | 593.40190 | 592.39752 | 4.872 |
| C31H61O8P   | 1 | [M+H]+     | 593.41820 | 592.41041 | 0.878 |
| C37H68O5    | 1 | [M+H]+     | 593.51510 | 592.50668 | 1.944 |
| C29H56NO9P  | 1 | [M+H]+     | 594.37860 | 593.36927 | 3.462 |
| C32H68NO6P  | 1 | [M+H]+     | 594.48600 | 593.47843 | 0.510 |
| C27H37ClO10 | 1 | [M+K]+     | 595.17280 | 556.20753 | 3.564 |
| C28H45O9P   | 1 | [M+K]+     | 595.24260 | 556.28012 | 1.131 |
| C33H57NO8   | 1 | [M+H]+     | 596.41320 | 595.40842 | 4.175 |
| C35H58O6    | 1 | [M+Na]+    | 597.41210 | 574.42334 | 0.773 |
| C27H44O11S  | 1 | [M+Na]+    | 599.25240 | 576.26044 | 4.574 |
| C30H57O8P   | 1 | [M+Na]+    | 599.37070 | 576.37911 | 3.954 |
| C35H60O6    | 1 | [M+Na]+    | 599.42840 | 576.43899 | 0.314 |
| C36H64O5    | 2 | [M+Na]+    | 599.46540 | 576.47538 | 1.340 |
| C38H64O5    | 1 | [M-H]-     | 599.46810 | 600.47538 | 0.010 |
| C36H67NO3   | 1 | [M+K]+     | 600.47350 | 561.51210 | 2.906 |
| C27H36O15   | 1 | [M+H]+     | 601.21270 | 600.20543 | 0.007 |
| C40H56O4    | 1 | [M+H]+     | 601.42240 | 600.41786 | 4.541 |
| C31H63O7P   | 1 | [M+Na]+    | 601.42240 | 578.43114 | 3.384 |
| C39H78O2    | 2 | [M+Na]+    | 601.58800 | 578.60018 | 2.330 |
| C28H54NO9P  | 1 | [M+Na]+    | 602.34220 | 579.35362 | 1.067 |
| C29H58NO8P  | 1 | [M+Na]+    | 602.38100 | 579.39001 | 2.942 |
| C36H54O6    | 1 | [M-2H+Na]- | 603.36830 | 582.39204 | 3.635 |
| C40H52O3    | 1 | [M+Na]+    | 603.38380 | 580.39165 | 4.861 |
| C38H66O5    | 1 | [M+H]+     | 603.49670 | 602.49103 | 2.645 |
| C36H68O5    | 1 | [M+Na]+    | 603.49670 | 580.50668 | 1.331 |
| C37H72O4    | 1 | [M+Na]+    | 603.53400 | 580.54306 | 2.847 |
| C39H70O4    | 6 | [M+H]+     | 603.53580 | 602.52741 | 1.854 |
| C31H60NO8P  | 1 | [M-H]-     | 604.39770 | 605.40566 | 1.137 |
| C40H54O3    | 1 | [M+Na]+    | 605.39810 | 582.40730 | 2.615 |
| C41H58O     | 2 | [M+K]+     | 605.41480 | 566.44877 | 4.764 |
| C32H61O8P   | 1 | [M+H]+     | 605.41480 | 604.41041 | 4.755 |
| C33H65O7P   | 2 | [M+H]+     | 605.45490 | 604.44679 | 1.381 |
| C41H80O2    | 1 | [M+H]+     | 605.62590 | 604.61583 | 4.622 |

|              |   |                        |           |           |       |
|--------------|---|------------------------|-----------|-----------|-------|
| C31H60N08P   | 1 | [M+H] <sup>+</sup>     | 606.41290 | 605.40566 | 0.045 |
| C40H56O2     | 5 | [M+K] <sup>+</sup>     | 607.39260 | 568.42803 | 2.336 |
| C41H60O      | 1 | [M+K] <sup>+</sup>     | 607.42860 | 568.46442 | 1.702 |
| C35H71N04    | 1 | [M+K] <sup>+</sup>     | 608.50010 | 569.53831 | 2.235 |
| C34H56O9     | 3 | [M+H] <sup>+</sup>     | 609.39790 | 608.39244 | 2.964 |
| C37H64O5     | 2 | [M-2H+Na] <sup>-</sup> | 609.45230 | 588.47538 | 4.689 |
| C30H54N07P   | 1 | [M+K] <sup>+</sup>     | 610.32680 | 571.36379 | 0.233 |
| C31H57O8P    | 1 | [M+Na] <sup>+</sup>    | 611.36670 | 588.37911 | 2.666 |
| C37H66O5     | 1 | [M-2H+Na] <sup>-</sup> | 611.46780 | 590.49103 | 4.429 |
| C39H64O5     | 1 | [M-H] <sup>-</sup>     | 611.46780 | 612.47538 | 0.500 |
| C39H72O3     | 1 | [M+Na] <sup>+</sup>    | 611.53730 | 588.54815 | 0.110 |
| C36H63N05    | 1 | [M+Na] <sup>+</sup>    | 612.46260 | 589.47063 | 4.497 |
| C39H48O6     | 1 | [M+H] <sup>+</sup>     | 613.35350 | 612.34509 | 1.857 |
| C29H57O11P   | 2 | [M+H] <sup>+</sup>     | 613.36840 | 612.36385 | 4.441 |
| C32H62O8     | 1 | [M+K] <sup>+</sup>     | 613.40780 | 574.44447 | 0.292 |
| C39H58O4     | 1 | [M+Na] <sup>+</sup>    | 613.42550 | 590.43351 | 4.512 |
| C40H78O2     | 4 | [M+Na] <sup>+</sup>    | 613.58750 | 590.60018 | 3.100 |
| C30H58N08P   | 1 | [M+Na] <sup>+</sup>    | 614.37920 | 591.39001 | 0.046 |
| C39H66O5     | 2 | [M+H] <sup>+</sup>     | 615.49650 | 614.49103 | 2.918 |
| C37H68O5     | 1 | [M+Na] <sup>+</sup>    | 615.49650 | 592.50668 | 0.980 |
| C39H68O5     | 1 | [M-H] <sup>-</sup>     | 615.49990 | 616.50668 | 0.803 |
| C40H80O2     | 5 | [M+Na] <sup>+</sup>    | 615.60320 | 592.61583 | 3.008 |
| C40H50O4     | 1 | [M+Na] <sup>+</sup>    | 617.36230 | 594.37091 | 3.512 |
| C36H56O8     | 1 | [M+H] <sup>+</sup>     | 617.40220 | 616.39752 | 4.197 |
| C33H63O8P    | 1 | [M-H] <sup>-</sup>     | 617.41880 | 618.42606 | 0.018 |
| C34H65O7P    | 1 | [M+H] <sup>+</sup>     | 617.45630 | 616.44679 | 3.621 |
| C36H66O5     | 1 | [M+K] <sup>+</sup>     | 617.45630 | 578.49103 | 3.440 |
| C39H68O5     | 5 | [M+H] <sup>+</sup>     | 617.51240 | 616.50668 | 2.504 |
| C37H70O5     | 5 | [M+Na] <sup>+</sup>    | 617.51240 | 594.52233 | 1.381 |
| C40H72O4     | 1 | [M+H] <sup>+</sup>     | 617.55150 | 616.54306 | 1.893 |
| C40H82O2     | 3 | [M+Na] <sup>+</sup>    | 617.61880 | 594.63148 | 3.080 |
| C26H45N09S2  | 1 | [M+K] <sup>+</sup>     | 618.21430 | 579.25358 | 3.931 |
| C29H58N08P   | 1 | [M+K] <sup>+</sup>     | 618.35420 | 579.39001 | 1.687 |
| C29H47O12P   | 1 | [M+H] <sup>+</sup>     | 619.29070 | 618.28052 | 4.702 |
| C40H52O3     | 1 | [M+K] <sup>+</sup>     | 619.35190 | 580.39165 | 4.676 |
| C33H56O9     | 1 | [M+Na] <sup>+</sup>    | 619.38380 | 596.39244 | 3.460 |
| C35H54O9     | 1 | [M+H] <sup>+</sup>     | 619.38380 | 618.37679 | 0.413 |
| C33H65O8P    | 1 | [M-H] <sup>-</sup>     | 619.43500 | 620.44171 | 0.906 |
| C36H68O5     | 1 | [M+K] <sup>+</sup>     | 619.46880 | 580.50668 | 1.656 |
| C34H67O7P    | 2 | [M+H] <sup>+</sup>     | 619.47060 | 618.46244 | 1.430 |
| C32H62N08P   | 2 | [M+H] <sup>+</sup>     | 620.43040 | 619.42131 | 2.938 |
| C26H47O12P   | 1 | [M+K] <sup>+</sup>     | 621.24260 | 582.28052 | 1.719 |
| C27H51O12P   | 1 | [M+Na] <sup>+</sup>    | 621.30400 | 598.31182 | 4.766 |
| C29H49O12P   | 1 | [M+H] <sup>+</sup>     | 621.30400 | 620.29617 | 0.905 |
| C41H58O2     | 1 | [M+K] <sup>+</sup>     | 621.40760 | 582.44368 | 1.238 |
| C25H48N2O9PS | 1 | [M+K] <sup>+</sup>     | 622.24510 | 583.28180 | 0.241 |
| C30H58N010P  | 2 | [M-H] <sup>-</sup>     | 622.37260 | 623.37984 | 0.053 |
| C32H64N08P   | 1 | [M+H] <sup>+</sup>     | 622.44250 | 621.43696 | 2.775 |
| C40H64O5     | 2 | [M-H] <sup>-</sup>     | 623.46830 | 624.47538 | 0.311 |

|               |   |                        |           |           |       |
|---------------|---|------------------------|-----------|-----------|-------|
| C30H58NO10P   | 3 | [M+H] <sup>+</sup>     | 624.38860 | 623.37984 | 2.391 |
| C29H53O12P    | 1 | [M+H] <sup>+</sup>     | 625.33420 | 624.32747 | 0.862 |
| C31H55O9P     | 1 | [M+Na] <sup>+</sup>    | 625.34830 | 602.35837 | 1.127 |
| C33H52O11     | 1 | [M+H] <sup>+</sup>     | 625.35790 | 624.35097 | 0.537 |
| C33H63O7P     | 1 | [M+Na] <sup>+</sup>    | 625.42150 | 602.43114 | 1.815 |
| C40H66O5      | 4 | [M-H] <sup>-</sup>     | 625.48480 | 626.49103 | 1.669 |
| C40H74O3      | 1 | [M+Na] <sup>+</sup>    | 625.55230 | 602.56380 | 1.146 |
| C37H71NO6     | 1 | [M+H] <sup>+</sup>     | 626.53570 | 625.52814 | 0.463 |
| C29H55O12P    | 3 | [M+H] <sup>+</sup>     | 627.35200 | 626.34312 | 2.568 |
| C34H68O8      | 1 | [M+Na] <sup>+</sup>    | 627.48080 | 604.49142 | 0.252 |
| C38H70O5      | 1 | [M-2H+Na] <sup>-</sup> | 627.49920 | 606.52233 | 4.475 |
| C40H68O5      | 1 | [M-H] <sup>-</sup>     | 627.49920 | 628.50668 | 0.328 |
| C17H27N3O17P2 | 3 | [M-2H+Na] <sup>-</sup> | 628.05410 | 607.08158 | 2.457 |
| C17H27N3O17P2 | 3 | [M-2H+Na] <sup>-</sup> | 628.05750 | 607.08158 | 2.957 |
| C17H27N3O17P2 | 3 | [M-2H+Na] <sup>-</sup> | 628.05830 | 607.08158 | 4.231 |
| C32H63O8P     | 1 | [M+Na] <sup>+</sup>    | 629.41370 | 606.42606 | 2.510 |
| C41H82O2      | 1 | [M+Na] <sup>+</sup>    | 629.61850 | 606.63148 | 3.497 |
| C17H27N3O17P2 | 1 | [M+Na] <sup>+</sup>    | 630.07300 | 607.08158 | 3.495 |
| C32H66NO7P    | 2 | [M+Na] <sup>+</sup>    | 630.44950 | 607.45769 | 4.103 |
| C34H56O9      | 1 | [M+Na] <sup>+</sup>    | 631.37890 | 608.39244 | 4.367 |
| C33H58O11     | 3 | [M+H] <sup>+</sup>     | 631.40420 | 630.39792 | 1.562 |
| C34H65O8P     | 1 | [M-H] <sup>-</sup>     | 631.43370 | 632.44171 | 1.170 |
| C35H67O7P     | 1 | [M+H] <sup>+</sup>     | 631.47100 | 630.46244 | 2.037 |
| C42H72O2      | 1 | [M+Na] <sup>+</sup>    | 631.54170 | 608.55323 | 1.191 |
| C40H80O3      | 3 | [M+Na] <sup>+</sup>    | 631.59830 | 608.61075 | 2.639 |
| C29H56NO10P   | 1 | [M+Na] <sup>+</sup>    | 632.35440 | 609.36419 | 1.569 |
| C27H47O12P    | 1 | [M+K] <sup>+</sup>     | 633.24510 | 594.28052 | 2.261 |
| C30H59O10P    | 1 | [M+Na] <sup>+</sup>    | 633.37220 | 610.38459 | 2.542 |
| C36H56O9      | 1 | [M+H] <sup>+</sup>     | 633.40070 | 632.39244 | 1.569 |
| C37H64N2O6    | 2 | [M+H] <sup>+</sup>     | 633.48610 | 632.47644 | 3.774 |
| C35H69O7P     | 2 | [M+H] <sup>+</sup>     | 633.48610 | 632.47809 | 1.162 |
| C38H74O5      | 1 | [M+Na] <sup>+</sup>    | 633.54190 | 610.55363 | 1.495 |
| C33H64NO8P    | 1 | [M+H] <sup>+</sup>     | 634.44460 | 633.43696 | 0.588 |
| C33H66NO8P    | 1 | [M-H] <sup>-</sup>     | 634.44530 | 635.45261 | 0.058 |
| C27H49O12P    | 1 | [M+K] <sup>+</sup>     | 635.26200 | 596.29617 | 4.222 |
| C42H60O2      | 1 | [M+K] <sup>+</sup>     | 635.41980 | 596.45933 | 4.219 |
| C40H74O5      | 1 | [M+H] <sup>+</sup>     | 635.55820 | 634.55363 | 4.242 |
| C33H66NO8P    | 1 | [M+H] <sup>+</sup>     | 636.46200 | 635.45261 | 3.336 |
| C41H81NO3     | 1 | [M+H] <sup>+</sup>     | 636.63080 | 635.62165 | 2.961 |
| C40H54O4      | 1 | [M+K] <sup>+</sup>     | 637.36520 | 598.40221 | 0.253 |
| C36H56O8      | 1 | [M-2H+Na] <sup>-</sup> | 637.37410 | 616.39752 | 3.943 |
| C33H59O8P     | 1 | [M+Na] <sup>+</sup>    | 637.38610 | 614.39476 | 3.326 |
| C40H54O5      | 1 | [M+Na] <sup>+</sup>    | 637.38610 | 614.39713 | 0.388 |
| C33H58O10     | 1 | [M+Na] <sup>+</sup>    | 637.39260 | 614.40300 | 0.593 |
| C45H80O       | 1 | [M+H] <sup>+</sup>     | 637.62570 | 636.62092 | 3.899 |
| C27H53O12P    | 1 | [M+K] <sup>+</sup>     | 639.29080 | 600.32747 | 0.283 |
| C35H59O8P     | 1 | [M+H] <sup>+</sup>     | 639.40040 | 638.39476 | 2.548 |
| C40H56O5      | 1 | [M+Na] <sup>+</sup>    | 639.40040 | 616.41278 | 2.498 |
| C33H61O8P     | 1 | [M+Na] <sup>+</sup>    | 639.40040 | 616.41041 | 1.204 |



|               |   |                        |           |           |       |
|---------------|---|------------------------|-----------|-----------|-------|
| C32H63O10P    | 1 | [M+H] <sup>+</sup>     | 639.42070 | 638.41589 | 3.846 |
| C39H74O6      | 1 | [M+H] <sup>+</sup>     | 639.55480 | 638.54854 | 1.581 |
| C44H78O2      | 1 | [M+H] <sup>+</sup>     | 639.60470 | 638.60018 | 4.301 |
| C32H59O8P     | 1 | [M+K] <sup>+</sup>     | 641.35500 | 602.39476 | 4.536 |
| C33H63O8P     | 3 | [M+Na] <sup>+</sup>    | 641.41700 | 618.42606 | 2.682 |
| C35H61O8P     | 3 | [M+H] <sup>+</sup>     | 641.41700 | 640.41041 | 1.059 |
| C42H82O2      | 3 | [M+Na] <sup>+</sup>    | 641.61910 | 618.63148 | 2.497 |
| C30H47N3O10S  | 1 | [M+H] <sup>+</sup>     | 642.30720 | 641.29822 | 2.662 |
| C34H70NO6P    | 1 | [M+Na] <sup>+</sup>    | 642.48240 | 619.49408 | 1.398 |
| C32H44O11     | 1 | [M+K] <sup>+</sup>     | 643.25110 | 604.28837 | 0.647 |
| C32H61O8P     | 1 | [M+K] <sup>+</sup>     | 643.37670 | 604.41041 | 4.882 |
| C33H65O8P     | 3 | [M+Na] <sup>+</sup>    | 643.43330 | 620.44171 | 3.683 |
| C35H63O8P     | 3 | [M+H] <sup>+</sup>     | 643.43330 | 642.42606 | 0.045 |
| C35H65O8P     | 1 | [M-H] <sup>-</sup>     | 643.43490 | 644.44171 | 0.716 |
| C42H84O2      | 3 | [M+Na] <sup>+</sup>    | 643.63520 | 620.64713 | 1.790 |
| C30H58NO10P   | 2 | [M-2H+Na] <sup>-</sup> | 644.35270 | 623.37984 | 1.867 |
| C33H68NO7P    | 1 | [M+Na] <sup>+</sup>    | 644.46460 | 621.47334 | 3.161 |
| C34H72NO6P    | 1 | [M+Na] <sup>+</sup>    | 644.50170 | 621.50973 | 4.270 |
| C36H69NO8     | 1 | [M+H] <sup>+</sup>     | 644.50780 | 643.50232 | 2.777 |
| C32H44F6O4    | 1 | [M+K] <sup>+</sup>     | 645.27830 | 606.31438 | 1.190 |
| C34H56O9      | 1 | [M-2H+K] <sup>-</sup>  | 645.33930 | 608.39244 | 2.690 |
| C40H64O5      | 2 | [M-2H+Na] <sup>-</sup> | 645.45060 | 624.47538 | 1.794 |
| C35H67O8P     | 1 | [M-H] <sup>-</sup>     | 645.45060 | 646.45736 | 0.792 |
| C36H69O7P     | 1 | [M+H] <sup>+</sup>     | 645.48580 | 644.47809 | 0.675 |
| C38H70O5      | 1 | [M+K] <sup>+</sup>     | 645.48580 | 606.52233 | 0.502 |
| C36H73N2O5P   | 1 | [M+H] <sup>+</sup>     | 645.53580 | 644.52571 | 4.367 |
| C17H27N3O17P2 | 1 | [M+K] <sup>+</sup>     | 646.04730 | 607.08158 | 3.983 |
| C30H58NO10P   | 1 | [M+Na] <sup>+</sup>    | 646.37020 | 623.37984 | 1.767 |
| C36H54O10     | 1 | [M+H] <sup>+</sup>     | 647.38010 | 646.37170 | 1.744 |
| C31H61O10P    | 1 | [M+Na] <sup>+</sup>    | 647.39230 | 624.40024 | 4.387 |
| C42H56O4      | 1 | [M+Na] <sup>+</sup>    | 647.40740 | 624.41786 | 0.491 |
| C40H66O5      | 4 | [M-2H+Na] <sup>-</sup> | 647.46630 | 626.49103 | 1.866 |
| C35H69O8P     | 1 | [M-H] <sup>-</sup>     | 647.46630 | 648.47301 | 0.866 |
| C39H76O5      | 1 | [M+Na] <sup>+</sup>    | 647.55990 | 624.56928 | 2.167 |
| C41H74O5      | 1 | [M+H] <sup>+</sup>     | 647.55990 | 646.55363 | 1.538 |
| C43H82O3      | 1 | [M+H] <sup>+</sup>     | 647.63050 | 646.62640 | 4.889 |
| C32H60NO10P   | 1 | [M-H] <sup>-</sup>     | 648.38860 | 649.39549 | 0.591 |
| C42H81NO3     | 1 | [M+H] <sup>+</sup>     | 648.62570 | 647.62165 | 4.957 |
| C33H54O11     | 1 | [M+Na] <sup>+</sup>    | 649.35630 | 626.36662 | 0.713 |
| C33H63O10P    | 1 | [M-H] <sup>-</sup>     | 649.41110 | 650.41589 | 3.820 |
| C35H73N2O6P   | 1 | [M+H] <sup>+</sup>     | 649.52820 | 648.52063 | 0.468 |
| C32H62NO10P   | 1 | [M-H] <sup>-</sup>     | 650.40410 | 651.41114 | 0.358 |
| C36H76NO6P    | 1 | [M+H] <sup>+</sup>     | 650.54580 | 649.54103 | 3.840 |
| C34H50O12     | 1 | [M+H] <sup>+</sup>     | 651.33540 | 650.33023 | 3.226 |
| C33H63O10P    | 1 | [M+H] <sup>+</sup>     | 651.42450 | 650.41589 | 2.059 |
| C39H64O5      | 1 | [M+K] <sup>+</sup>     | 651.43670 | 612.47538 | 2.803 |
| C31H59O12P    | 1 | [M-H] <sup>-</sup>     | 653.36670 | 654.37442 | 0.687 |
| C36H56O9      | 1 | [M-2H+Na] <sup>-</sup> | 653.36670 | 632.39244 | 0.303 |
| C36H61O8P     | 1 | [M+H] <sup>+</sup>     | 653.42030 | 652.41041 | 4.011 |

|             |   |            |           |           |       |
|-------------|---|------------|-----------|-----------|-------|
| C44H72O2    | 1 | [M+Na]+    | 655.54140 | 632.55323 | 1.605 |
| C35H62NO8P  | 2 | [M+H]+     | 656.42910 | 655.42131 | 0.797 |
| C33H64NO8P  | 1 | [M+Na]+    | 656.42910 | 633.43696 | 4.451 |
| C35H54O10   | 1 | [M+Na]+    | 657.36270 | 634.37170 | 2.705 |
| C31H61O12P  | 1 | [M+H]+     | 657.39480 | 656.39007 | 3.862 |
| C34H67O7P   | 1 | [M+K]+     | 657.42370 | 618.46244 | 2.881 |
| C41H64O5    | 1 | [M-2H+Na]- | 657.44980 | 636.47538 | 0.545 |
| C36H67O8P   | 1 | [M-H]-     | 657.44980 | 658.45736 | 0.440 |
| C35H71O7P   | 1 | [M+Na]+    | 657.48470 | 634.49374 | 2.639 |
| C39H70O5    | 1 | [M+K]+     | 657.48470 | 618.52233 | 1.180 |
| C37H69O7P   | 1 | [M+H]+     | 657.48470 | 656.47809 | 1.010 |
| C43H70O3    | 1 | [M+Na]+    | 657.52120 | 634.53250 | 0.786 |
| C42H72O5    | 1 | [M+H]+     | 657.54740 | 656.53798 | 3.276 |
| C35H64NO8P  | 4 | [M+H]+     | 658.44440 | 657.43696 | 0.263 |
| C33H66NO8P  | 3 | [M+Na]+    | 658.44440 | 635.45261 | 3.906 |
| C34H72NO6P  | 1 | [M-2H+K]-  | 658.45710 | 621.50973 | 1.863 |
| C34H69O7P   | 1 | [M+K]+     | 659.43880 | 620.47809 | 3.706 |
| C41H64O4    | 2 | [M+K]+     | 659.44590 | 620.48046 | 3.471 |
| C34H68O9    | 2 | [M+K]+     | 659.44700 | 620.48634 | 3.770 |
| C43H64O5    | 1 | [M-H]-     | 659.46580 | 660.47538 | 3.497 |
| C41H66O5    | 1 | [M-2H+Na]- | 659.46580 | 638.49103 | 1.074 |
| C36H69O8P   | 1 | [M-H]-     | 659.46580 | 660.47301 | 0.092 |
| C42H84O3    | 3 | [M+Na]+    | 659.62990 | 636.64205 | 2.072 |
| C35H67NO8S  | 1 | [M-H]-     | 660.45320 | 661.45874 | 2.616 |
| C35H68NO8P  | 1 | [M-H]-     | 660.46140 | 661.46826 | 0.625 |
| C35H66NO8P  | 1 | [M+H]+     | 660.46210 | 659.45261 | 3.366 |
| C35H70NO8P  | 2 | [M-H]-     | 662.47660 | 663.48391 | 0.056 |
| C37H71NO6   | 1 | [M-2H+K]-  | 662.47660 | 625.52814 | 0.211 |
| C35H68NO8P  | 6 | [M+H]+     | 662.47710 | 661.46826 | 2.374 |
| C40H63N5O3  | 1 | [M+H]+     | 662.49730 | 661.49309 | 4.619 |
| C40H81NO3   | 2 | [M+K]+     | 662.58460 | 623.62165 | 0.294 |
| C37H58O10   | 2 | [M+H]+     | 663.41030 | 662.40300 | 0.044 |
| C40H64O5    | 2 | [M+K]+     | 663.43570 | 624.47538 | 4.260 |
| C34H66NO9P  | 2 | [M+H]+     | 664.45780 | 663.44752 | 4.527 |
| C35H70NO8P  | 3 | [M+H]+     | 664.49330 | 663.48391 | 3.195 |
| C37H71NO6   | 2 | [M+K]+     | 664.49330 | 625.52814 | 3.025 |
| C34H58O10   | 1 | [M+K]+     | 665.36470 | 626.40300 | 2.181 |
| C30H59O12P  | 1 | [M+Na]+    | 665.36470 | 642.37442 | 1.593 |
| C37H61O8P   | 1 | [M+H]+     | 665.41800 | 664.41041 | 0.482 |
| C41H70O5    | 1 | [M+Na]+    | 665.51320 | 642.52233 | 2.484 |
| C43H68O5    | 1 | [M+H]+     | 665.51320 | 664.50668 | 1.121 |
| C33H64NO10P | 1 | [M+H]+     | 666.43660 | 665.42679 | 3.816 |
| C35H65O8P   | 4 | [M+Na]+    | 667.43260 | 644.44171 | 2.502 |
| C37H63O8P   | 4 | [M+H]+     | 667.43260 | 666.42606 | 1.092 |
| C41H74O5    | 1 | [M-2H+Na]- | 667.53050 | 646.55363 | 4.207 |
| C43H72O5    | 1 | [M-H]-     | 667.53050 | 668.53798 | 0.309 |
| C42H85NO4   | 1 | [M+H]+     | 668.65220 | 667.64786 | 4.382 |
| C37H65O8P   | 6 | [M+H]+     | 669.44770 | 668.44171 | 1.911 |
| C35H67O8P   | 6 | [M+Na]+    | 669.44770 | 646.45736 | 1.673 |

|             |   |            |           |           |       |
|-------------|---|------------|-----------|-----------|-------|
| C45H74O2    | 1 | [M+Na]+    | 669.56120 | 646.56888 | 4.627 |
| C35H69O8P   | 5 | [M+Na]+    | 671.46470 | 648.47301 | 3.679 |
| C37H67O8P   | 5 | [M+H]+     | 671.46470 | 670.45736 | 0.106 |
| C42H66O5    | 1 | [M-2H+Na]- | 671.46590 | 650.49103 | 1.203 |
| C37H69O8P   | 1 | [M-H]-     | 671.46590 | 672.47301 | 0.240 |
| C45H76O2    | 1 | [M+Na]+    | 671.57260 | 648.58453 | 1.715 |
| C32H60NO10P | 2 | [M+Na]+    | 672.38510 | 649.39549 | 0.583 |
| C33H64NO9P  | 1 | [M+Na]+    | 672.42270 | 649.43187 | 2.390 |
| C34H68NO8P  | 2 | [M+Na]+    | 672.46000 | 649.46826 | 3.750 |
| C36H66NO8P  | 2 | [M+H]+     | 672.46000 | 671.45261 | 0.183 |
| C41H79NO3   | 1 | [M+K]+     | 672.56580 | 633.60600 | 4.973 |
| C42H68O5    | 1 | [M-2H+Na]- | 673.48190 | 652.50668 | 1.719 |
| C37H71O8P   | 1 | [M-H]-     | 673.48190 | 674.48866 | 0.759 |
| C38H73O7P   | 1 | [M+H]+     | 673.51340 | 672.50939 | 4.846 |
| C43H70O4    | 1 | [M+Na]+    | 673.51340 | 650.52741 | 4.799 |
| C33H57NO13  | 1 | [M-H]-     | 674.37430 | 675.38300 | 2.113 |
| C32H62NO10P | 2 | [M+Na]+    | 674.40180 | 651.41114 | 2.138 |
| C31H57O12P  | 1 | [M+Na]+    | 675.34870 | 652.35877 | 1.051 |
| C35H65O10P  | 1 | [M-H]-     | 675.42600 | 676.43154 | 2.563 |
| C42H60O7    | 1 | [M-H]-     | 675.42600 | 676.43390 | 0.933 |
| C36H69O9P   | 1 | [M-H]-     | 675.46160 | 676.46792 | 1.401 |
| C43H88O3    | 1 | [M+Na]+    | 675.66320 | 652.67335 | 0.935 |
| C35H68NO9P  | 1 | [M-H]-     | 676.45600 | 677.46317 | 0.145 |
| C36H72NO8P  | 2 | [M-H]-     | 676.49280 | 677.49956 | 0.758 |
| C36H70NO8P  | 3 | [M+H]+     | 676.49380 | 675.48391 | 3.877 |
| C35H65O10P  | 1 | [M+H]+     | 677.43560 | 676.43154 | 4.737 |
| C35H67O10P  | 1 | [M-H]-     | 677.44090 | 678.44719 | 1.448 |
| C34H64NO10P | 1 | [M+H]+     | 678.43390 | 677.42679 | 0.231 |
| C38H80NO6P  | 1 | [M+H]+     | 678.57680 | 677.57233 | 4.123 |
| C40H54O7S   | 1 | [M+H]+     | 679.36670 | 678.35903 | 0.590 |
| C35H67O10P  | 1 | [M+H]+     | 679.45400 | 678.44719 | 0.676 |
| C43H82O5    | 1 | [M+H]+     | 679.62440 | 678.61623 | 1.330 |
| C38H65NO9   | 1 | [M+H]+     | 680.47270 | 679.46594 | 0.742 |
| C35H70NO9P  | 1 | [M+H]+     | 680.48460 | 679.47882 | 2.193 |
| C42H58O6    | 1 | [M+Na]+    | 681.41500 | 658.42334 | 3.578 |
| C36H67O7P   | 1 | [M+K]+     | 681.42590 | 642.46244 | 0.449 |
| C36H67O8P   | 1 | [M+Na]+    | 681.44800 | 658.45736 | 2.084 |
| C38H65O8P   | 1 | [M+H]+     | 681.44800 | 680.44171 | 1.437 |
| C35H69O10P  | 1 | [M+H]+     | 681.47330 | 680.46284 | 4.683 |
| C37H64NO8P  | 2 | [M+H]+     | 682.44390 | 681.43696 | 0.479 |
| C35H66NO8P  | 1 | [M+Na]+    | 682.44390 | 659.45261 | 3.036 |
| C36H70NO7P  | 1 | [M+Na]+    | 682.47700 | 659.48899 | 1.777 |
| C40H73N3O4  | 2 | [M+Na]+    | 682.54840 | 659.56011 | 1.360 |
| C38H67O8P   | 6 | [M+H]+     | 683.46270 | 682.45736 | 2.822 |
| C43H64O5    | 6 | [M+Na]+    | 683.46270 | 660.47538 | 2.776 |
| C36H69O8P   | 6 | [M+Na]+    | 683.46270 | 660.47301 | 0.688 |
| C36H73N2O5P | 1 | [M+K]+     | 683.49100 | 644.52571 | 3.130 |
| C46H76O2    | 1 | [M+Na]+    | 683.57680 | 660.58453 | 4.459 |
| C34H64NO8P  | 1 | [M+K]+     | 684.40230 | 645.43696 | 3.204 |

|              |   |            |           |           |       |
|--------------|---|------------|-----------|-----------|-------|
| C35H68NO7P   | 3 | [M+K]+     | 684.43880 | 645.47334 | 3.372 |
| C35H67NO8S   | 1 | [M+Na]+    | 684.44950 | 661.45874 | 2.246 |
| C35H70NO8P   | 2 | [M-2H+Na]- | 684.46130 | 663.48391 | 4.861 |
| C37H68NO8P   | 1 | [M-H]-     | 684.46130 | 685.46826 | 0.457 |
| C37H66NO8P   | 6 | [M+H]+     | 684.46200 | 683.45261 | 3.102 |
| C36H72NO6P   | 1 | [M+K]+     | 684.47620 | 645.50973 | 4.855 |
| C42H85NO5    | 1 | [M+H]+     | 684.65190 | 683.64278 | 2.709 |
| C32H53NaO12S | 1 | [M+H]+     | 685.32580 | 684.31555 | 4.353 |
| C37H58O10    | 1 | [M+Na]+    | 685.39170 | 662.40300 | 0.762 |
| C34H63O10P   | 1 | [M+Na]+    | 685.40750 | 662.41589 | 3.487 |
| C36H70O9     | 4 | [M+K]+     | 685.46370 | 646.50199 | 2.095 |
| C35H70N2O8   | 1 | [M+K]+     | 685.47340 | 646.51322 | 4.331 |
| C45H66O5     | 1 | [M-H]-     | 685.48160 | 686.49103 | 3.145 |
| C43H68O5     | 1 | [M-2H+Na]- | 685.48160 | 664.50668 | 1.252 |
| C38H71O8P    | 1 | [M-H]-     | 685.48160 | 686.48866 | 0.308 |
| C43H66O5     | 1 | [M+Na]+    | 685.48250 | 662.49103 | 3.287 |
| C38H69O8P    | 1 | [M+H]+     | 685.48250 | 684.47301 | 3.240 |
| C37H75O7P    | 1 | [M+Na]+    | 685.51650 | 662.52504 | 3.260 |
| C39H73O7P    | 1 | [M+H]+     | 685.51650 | 684.50939 | 0.239 |
| C39H76N2O7   | 1 | [M+H]+     | 685.57550 | 684.56525 | 4.341 |
| C42H78O5     | 1 | [M+Na]+    | 685.57550 | 662.58493 | 1.974 |
| C44H76O5     | 1 | [M+H]+     | 685.57550 | 684.56928 | 1.526 |
| C45H90O2     | 1 | [M+Na]+    | 685.68200 | 662.69408 | 1.900 |
| C33H62NO10P  | 1 | [M+Na]+    | 686.39740 | 663.41114 | 4.309 |
| C34H66NO8P   | 1 | [M+K]+     | 686.41580 | 647.45261 | 0.063 |
| C35H70NO7P   | 2 | [M+K]+     | 686.45340 | 647.48899 | 1.833 |
| C37H68NO8P   | 6 | [M+H]+     | 686.47460 | 685.46826 | 1.350 |
| C35H70NO8P   | 3 | [M+Na]+    | 686.47460 | 663.48391 | 2.144 |
| C37H70NO8P   | 1 | [M-H]-     | 686.47710 | 687.48391 | 0.674 |
| C38H72NO7P   | 3 | [M+H]+     | 686.51010 | 685.50464 | 2.639 |
| C36H74NO7P   | 2 | [M+Na]+    | 686.51010 | 663.52029 | 0.854 |
| C43H85NO3    | 1 | [M+Na]+    | 686.64530 | 663.65295 | 4.564 |
| C40H56O6S    | 1 | [M+Na]+    | 687.37060 | 664.37976 | 2.350 |
| C36H63O10P   | 1 | [M+H]+     | 687.42540 | 686.41589 | 3.260 |
| C35H71O9P    | 1 | [M-2H+Na]- | 687.46040 | 666.48357 | 4.015 |
| C36H73O7P    | 1 | [M+K]+     | 687.47100 | 648.50939 | 2.246 |
| C43H68O4     | 3 | [M+K]+     | 687.47720 | 648.51176 | 3.330 |
| C36H72O9     | 5 | [M+K]+     | 687.47870 | 648.51764 | 3.034 |
| C43H70O4     | 1 | [M-2H+K]-  | 687.47940 | 650.52741 | 4.930 |
| C45H68O5     | 1 | [M-H]-     | 687.49620 | 688.50668 | 4.663 |
| C38H73O8P    | 1 | [M-H]-     | 687.49620 | 688.50431 | 1.220 |
| C43H70O5     | 1 | [M-2H+Na]- | 687.49620 | 666.52233 | 0.279 |
| C38H75N2O6P  | 1 | [M+H]+     | 687.54260 | 686.53628 | 1.376 |
| C34H59NO13   | 1 | [M-H]-     | 688.39330 | 689.39865 | 2.796 |
| C35H64NO10P  | 1 | [M-H]-     | 688.41900 | 689.42679 | 0.751 |
| C35H72NO7P   | 1 | [M+K]+     | 688.46860 | 649.50464 | 1.174 |
| C37H70NO8P   | 6 | [M+H]+     | 688.49280 | 687.48391 | 2.357 |
| C37H72NO8P   | 2 | [M-H]-     | 688.49310 | 689.49956 | 1.181 |
| C37H72NO8P   | 2 | [M-H]-     | 688.49360 | 689.49956 | 1.907 |

|             |   |                        |           |           |       |
|-------------|---|------------------------|-----------|-----------|-------|
| C38H74NO7P  | 1 | [M+H] <sup>+</sup>     | 688.52880 | 687.52029 | 1.797 |
| C42H83NO3   | 1 | [M+K] <sup>+</sup>     | 688.59870 | 649.63730 | 2.534 |
| C39H61O8P   | 2 | [M+H] <sup>+</sup>     | 689.41460 | 688.41041 | 4.466 |
| C34H67O9P   | 2 | [M+K] <sup>+</sup>     | 689.41460 | 650.45227 | 1.195 |
| C34H67O10P  | 1 | [M+Na] <sup>+</sup>    | 689.43850 | 666.44719 | 3.031 |
| C36H65O10P  | 1 | [M+H] <sup>+</sup>     | 689.43850 | 688.43154 | 0.448 |
| C37H71O9P   | 1 | [M-H] <sup>-</sup>     | 689.47660 | 690.48357 | 0.429 |
| C44H80O5    | 1 | [M+H] <sup>+</sup>     | 689.60940 | 688.60058 | 2.253 |
| C46H82O2    | 1 | [M+Na] <sup>+</sup>    | 689.62290 | 666.63148 | 3.187 |
| C43H86O3    | 1 | [M+K] <sup>+</sup>     | 689.62290 | 650.65770 | 2.978 |
| C37H74NO8P  | 2 | [M-H] <sup>-</sup>     | 690.50770 | 691.51521 | 0.345 |
| C37H72NO8P  | 6 | [M+H] <sup>+</sup>     | 690.50820 | 689.49956 | 1.988 |
| C42H85NO3   | 1 | [M+K] <sup>+</sup>     | 690.61730 | 651.65295 | 1.745 |
| C34H69O9P   | 6 | [M+K] <sup>+</sup>     | 691.42980 | 652.46792 | 1.843 |
| C39H63O8P   | 4 | [M+H] <sup>+</sup>     | 691.43000 | 690.42606 | 4.815 |
| C36H69O10P  | 1 | [M-H] <sup>-</sup>     | 691.45540 | 692.46284 | 0.244 |
| C44H82O5    | 1 | [M+H] <sup>+</sup>     | 691.62520 | 690.61623 | 2.464 |
| C35H68NO10P | 1 | [M-H] <sup>-</sup>     | 692.45050 | 693.45809 | 0.458 |
| C37H74NO8P  | 6 | [M+H] <sup>+</sup>     | 692.52470 | 691.51521 | 3.209 |
| C37H67O7P   | 1 | [M+K] <sup>+</sup>     | 693.42860 | 654.46244 | 4.335 |
| C39H65O8P   | 1 | [M+H] <sup>+</sup>     | 693.44620 | 692.44171 | 4.008 |
| C36H71O10P  | 1 | [M-H] <sup>-</sup>     | 693.47200 | 694.47849 | 1.126 |
| C44H84O5    | 1 | [M+H] <sup>+</sup>     | 693.63600 | 692.63188 | 4.535 |
| C27H44O14S2 | 3 | [M+K] <sup>+</sup>     | 695.18240 | 656.21726 | 2.868 |
| C35H66O13   | 1 | [M+H] <sup>+</sup>     | 695.45440 | 694.45035 | 4.624 |
| C39H67O8P   | 6 | [M+H] <sup>+</sup>     | 695.46290 | 694.45736 | 2.486 |
| C37H69O8P   | 6 | [M+Na] <sup>+</sup>    | 695.46290 | 672.47301 | 0.963 |
| C37H75O9P   | 1 | [M+H] <sup>+</sup>     | 695.51950 | 694.51487 | 3.801 |
| C43H78O5    | 1 | [M-2H+Na] <sup>-</sup> | 695.56210 | 674.58493 | 4.468 |
| C45H76O5    | 1 | [M-H] <sup>-</sup>     | 695.56210 | 696.56928 | 0.135 |
| C36H68NO8P  | 1 | [M+Na] <sup>+</sup>    | 696.45990 | 673.46826 | 3.478 |
| C38H66NO8P  | 1 | [M+H] <sup>+</sup>     | 696.45990 | 695.45261 | 0.033 |
| C38H76NO6P  | 1 | [M+Na] <sup>+</sup>    | 696.53120 | 673.54103 | 1.365 |
| C37H71O7P   | 1 | [M+K] <sup>+</sup>     | 697.45420 | 658.49374 | 3.863 |
| C37H71O8P   | 6 | [M+Na] <sup>+</sup>    | 697.47910 | 674.48866 | 1.749 |
| C39H69O8P   | 6 | [M+H] <sup>+</sup>     | 697.47910 | 696.47301 | 1.690 |
| C49H76O2    | 1 | [M+H] <sup>+</sup>     | 697.59000 | 696.58453 | 2.582 |
| C47H78O2    | 1 | [M+Na] <sup>+</sup>    | 697.59000 | 674.60018 | 0.857 |
| C38H68NO8P  | 6 | [M+H] <sup>+</sup>     | 698.47500 | 697.46826 | 0.755 |
| C36H70NO8P  | 3 | [M+Na] <sup>+</sup>    | 698.47500 | 675.48391 | 2.680 |
| C36H72NO8P  | 2 | [M-2H+Na] <sup>-</sup> | 698.47580 | 677.49956 | 3.117 |
| C38H70NO8P  | 1 | [M-H] <sup>-</sup>     | 698.47580 | 699.48391 | 1.198 |
| C40H75NO8   | 1 | [M+H] <sup>+</sup>     | 698.55840 | 697.54927 | 2.663 |
| C33H63O13P  | 1 | [M+H] <sup>+</sup>     | 699.40900 | 698.40063 | 1.567 |
| C42H60O7    | 1 | [M+Na] <sup>+</sup>    | 699.42570 | 676.43390 | 3.687 |
| C36H71O9P   | 1 | [M-2H+Na] <sup>-</sup> | 699.46030 | 678.48357 | 3.803 |
| C37H73O7P   | 2 | [M+K] <sup>+</sup>     | 699.47220 | 660.50939 | 0.492 |
| C39H73O8P   | 1 | [M-H] <sup>-</sup>     | 699.49740 | 700.50431 | 0.516 |
| C42H76O5    | 1 | [M+K] <sup>+</sup>     | 699.53060 | 660.56928 | 2.610 |

|             |   |                        |           |           |       |
|-------------|---|------------------------|-----------|-----------|-------|
| C40H75O7P   | 1 | [M+H] <sup>+</sup>     | 699.53060 | 698.52504 | 2.450 |
| C38H77O7P   | 1 | [M+Na] <sup>+</sup>    | 699.53060 | 676.54069 | 0.979 |
| C35H68NO8P  | 1 | [M+K] <sup>+</sup>     | 700.43080 | 661.46826 | 0.867 |
| C35H68NO9P  | 2 | [M+Na] <sup>+</sup>    | 700.45530 | 677.46317 | 4.150 |
| C40H63N5O3  | 1 | [M+K] <sup>+</sup>     | 700.45530 | 661.49309 | 1.342 |
| C38H70NO8P  | 5 | [M+H] <sup>+</sup>     | 700.49060 | 699.48391 | 0.824 |
| C36H72NO8P  | 4 | [M+Na] <sup>+</sup>    | 700.49060 | 677.49956 | 2.601 |
| C38H72NO8P  | 1 | [M-H] <sup>-</sup>     | 700.49230 | 701.49956 | 0.019 |
| C40H77NO8   | 1 | [M+H] <sup>+</sup>     | 700.57070 | 699.56492 | 2.127 |
| C37H65O10P  | 1 | [M+H] <sup>+</sup>     | 701.43550 | 700.43154 | 4.717 |
| C35H69O10P  | 1 | [M-2H+Na] <sup>-</sup> | 701.43960 | 680.46284 | 3.842 |
| C37H67O10P  | 1 | [M-H] <sup>-</sup>     | 701.43960 | 702.44719 | 0.455 |
| C39H67O7P   | 1 | [M+Na] <sup>+</sup>    | 701.45270 | 678.46244 | 1.476 |
| C36H71O8P   | 1 | [M+K] <sup>+</sup>     | 701.45270 | 662.48866 | 1.270 |
| C36H71O9P   | 1 | [M+Na] <sup>+</sup>    | 701.47040 | 678.48357 | 3.414 |
| C36H73O9P   | 1 | [M-2H+Na] <sup>-</sup> | 701.47630 | 680.49922 | 4.291 |
| C36H75N2O6P | 2 | [M+K] <sup>+</sup>     | 701.50170 | 662.53628 | 3.242 |
| C39H73O8P   | 1 | [M+H] <sup>+</sup>     | 701.51060 | 700.50431 | 1.396 |
| C45H80O5    | 1 | [M+H] <sup>+</sup>     | 701.61020 | 700.60058 | 3.355 |
| C34H66NO10P | 1 | [M+Na] <sup>+</sup>    | 702.43360 | 679.44244 | 2.765 |
| C36H64NO10P | 1 | [M+H] <sup>+</sup>     | 702.43360 | 701.42679 | 0.651 |
| C35H70NO8P  | 1 | [M+K] <sup>+</sup>     | 702.44810 | 663.48391 | 1.485 |
| C37H70NO9P  | 1 | [M-H] <sup>-</sup>     | 702.47250 | 703.47882 | 1.350 |
| C38H72NO8P  | 3 | [M+H] <sup>+</sup>     | 702.50890 | 701.49956 | 2.951 |
| C38H74NO8P  | 1 | [M-H] <sup>-</sup>     | 702.50890 | 703.51521 | 1.369 |
| C37H78NO6P  | 1 | [M+K] <sup>+</sup>     | 702.52260 | 663.55668 | 3.946 |
| C40H79NO8   | 1 | [M+H] <sup>+</sup>     | 702.58650 | 701.58057 | 1.907 |
| C44H89NO3   | 2 | [M+Na] <sup>+</sup>    | 702.67460 | 679.68425 | 1.614 |
| C35H69O10P  | 1 | [M+Na] <sup>+</sup>    | 703.45000 | 680.46284 | 2.928 |
| C37H67O10P  | 2 | [M+H] <sup>+</sup>     | 703.45540 | 702.44719 | 1.338 |
| C37H69O10P  | 1 | [M-H] <sup>-</sup>     | 703.45580 | 704.46284 | 0.328 |
| C38H73O9P   | 1 | [M-H] <sup>-</sup>     | 703.48910 | 704.49922 | 4.057 |
| C36H73O9P   | 1 | [M+Na] <sup>+</sup>    | 703.49010 | 680.49922 | 2.353 |
| C43H74O7    | 1 | [M+H] <sup>+</sup>     | 703.54970 | 702.54346 | 1.458 |
| C43H84O5    | 1 | [M+Na] <sup>+</sup>    | 703.62440 | 680.63188 | 4.694 |
| C45H82O5    | 1 | [M+H] <sup>+</sup>     | 703.62440 | 702.61623 | 1.285 |
| C34H68NO9P  | 2 | [M+K] <sup>+</sup>     | 704.42460 | 665.46317 | 2.445 |
| C36H68NO10P | 1 | [M-H] <sup>-</sup>     | 704.45370 | 705.45809 | 4.093 |
| C37H72NO9P  | 1 | [M-H] <sup>-</sup>     | 704.48720 | 705.49447 | 0.004 |
| C37H70NO9P  | 1 | [M+H] <sup>+</sup>     | 704.48880 | 703.47882 | 3.844 |
| C38H74NO8P  | 6 | [M+H] <sup>+</sup>     | 704.52430 | 703.51521 | 2.586 |
| C35H71O9P   | 4 | [M+K] <sup>+</sup>     | 705.44490 | 666.48357 | 2.586 |
| C40H65O8P   | 2 | [M+H] <sup>+</sup>     | 705.44670 | 704.44171 | 3.231 |
| C37H71O10P  | 1 | [M-H] <sup>-</sup>     | 705.47230 | 706.47849 | 1.532 |
| C37H69O10P  | 3 | [M+H] <sup>+</sup>     | 705.47310 | 704.46284 | 4.240 |
| C39H71O7P   | 1 | [M+Na] <sup>+</sup>    | 705.47960 | 682.49374 | 4.770 |
| C38H73O9P   | 1 | [M+H] <sup>+</sup>     | 705.50420 | 704.49922 | 3.252 |
| C42H82O5    | 1 | [M+K] <sup>+</sup>     | 705.57610 | 666.61623 | 4.643 |
| C40H81O7P   | 1 | [M+H] <sup>+</sup>     | 705.57610 | 704.57199 | 4.484 |

|             |   |                        |           |           |       |
|-------------|---|------------------------|-----------|-----------|-------|
| C39H81N2O6P | 1 | [M+H] <sup>+</sup>     | 705.59070 | 704.58323 | 0.289 |
| C37H72NO9P  | 1 | [M+H] <sup>+</sup>     | 706.50250 | 705.49447 | 1.071 |
| C39H74NO6P  | 1 | [M+Na] <sup>+</sup>    | 706.51620 | 683.52538 | 2.266 |
| C37H67O8P   | 1 | [M-2H+K] <sup>-</sup>  | 707.40490 | 670.45736 | 1.497 |
| C38H75O9P   | 1 | [M+H] <sup>+</sup>     | 707.51880 | 706.51487 | 4.726 |
| C37H68NO8P  | 1 | [M+Na] <sup>+</sup>    | 708.45610 | 685.46826 | 1.945 |
| C39H66NO8P  | 5 | [M+H] <sup>+</sup>     | 708.45660 | 707.45261 | 4.626 |
| C37H74NO9P  | 1 | [M+H] <sup>+</sup>     | 708.52060 | 707.51012 | 4.526 |
| C38H71O7P   | 3 | [M+K] <sup>+</sup>     | 709.45980 | 670.49374 | 4.096 |
| C40H69O8P   | 1 | [M+H] <sup>+</sup>     | 709.47870 | 708.47301 | 2.226 |
| C45H66O5    | 1 | [M+Na] <sup>+</sup>    | 709.47870 | 686.49103 | 2.180 |
| C38H71O8P   | 1 | [M+Na] <sup>+</sup>    | 709.47870 | 686.48866 | 1.156 |
| C37H73O8PS  | 1 | [M+H] <sup>+</sup>     | 709.48700 | 708.47638 | 4.720 |
| C44H78O5    | 1 | [M+Na] <sup>+</sup>    | 709.57580 | 686.58493 | 2.330 |
| C45H88O5    | 1 | [M+H] <sup>+</sup>     | 709.66780 | 708.66318 | 3.730 |
| C39H68NO8P  | 6 | [M+H] <sup>+</sup>     | 710.47420 | 709.46826 | 1.868 |
| C37H70NO8P  | 1 | [M+Na] <sup>+</sup>    | 710.47420 | 687.48391 | 1.509 |
| C39H61O8P   | 1 | [M+Na] <sup>+</sup>    | 711.39950 | 688.41041 | 0.183 |
| C38H73O8P   | 1 | [M+Na] <sup>+</sup>    | 711.49120 | 688.50431 | 3.275 |
| C50H72      | 1 | [M+K] <sup>+</sup>     | 711.52360 | 672.56340 | 4.147 |
| C38H77N2O6P | 1 | [M+Na] <sup>+</sup>    | 711.53960 | 688.55193 | 2.174 |
| C34H59NO13  | 1 | [M+Na] <sup>+</sup>    | 712.39020 | 689.39865 | 3.276 |
| C34H66NO12P | 3 | [M+H] <sup>+</sup>     | 712.44110 | 711.43227 | 2.194 |
| C36H68NO9P  | 4 | [M+Na] <sup>+</sup>    | 712.45560 | 689.46317 | 4.501 |
| C36H70NO9P  | 1 | [M-2H+Na] <sup>-</sup> | 712.45570 | 691.47882 | 3.947 |
| C37H72NO7P  | 4 | [M+K] <sup>+</sup>     | 712.46790 | 673.50464 | 0.152 |
| C39H70NO8P  | 6 | [M+H] <sup>+</sup>     | 712.49000 | 711.48391 | 1.652 |
| C37H74NO8P  | 2 | [M-2H+Na] <sup>-</sup> | 712.49220 | 691.51521 | 4.107 |
| C39H72NO8P  | 1 | [M-H] <sup>-</sup>     | 712.49220 | 713.49956 | 0.122 |
| C38H76NO6P  | 1 | [M+K] <sup>+</sup>     | 712.50270 | 673.54103 | 2.074 |
| C38H75NO8   | 4 | [M+K] <sup>+</sup>     | 712.50930 | 673.54927 | 4.379 |
| C38H76NO7P  | 3 | [M+Na] <sup>+</sup>    | 712.52500 | 689.53594 | 0.230 |
| C34H65O13P  | 1 | [M+H] <sup>+</sup>     | 713.42090 | 712.41628 | 3.720 |
| C38H65O10P  | 1 | [M+H] <sup>+</sup>     | 713.43530 | 712.43154 | 4.918 |
| C36H67O10P  | 1 | [M+Na] <sup>+</sup>    | 713.43530 | 690.44719 | 1.556 |
| C37H71O9P   | 3 | [M+Na] <sup>+</sup>    | 713.47250 | 690.48357 | 0.413 |
| C38H74O9    | 6 | [M+K] <sup>+</sup>     | 713.49320 | 674.53329 | 4.535 |
| C38H76O9    | 1 | [M-2H+K] <sup>-</sup>  | 713.49470 | 676.54894 | 3.975 |
| C40H73O8P   | 3 | [M+H] <sup>+</sup>     | 713.50920 | 712.50431 | 3.334 |
| C45H70O5    | 3 | [M+Na] <sup>+</sup>    | 713.50920 | 690.52233 | 3.289 |
| C38H75O8P   | 3 | [M+Na] <sup>+</sup>    | 713.50920 | 690.51996 | 0.028 |
| C47H68O5    | 2 | [M+H] <sup>+</sup>     | 713.51270 | 712.50668 | 1.746 |
| C39H79O7P   | 2 | [M+Na] <sup>+</sup>    | 713.54270 | 690.55634 | 4.015 |
| C38H79N2O6P | 1 | [M+Na] <sup>+</sup>    | 713.55720 | 690.56758 | 0.565 |
| C34H62NO10P | 1 | [M+K] <sup>+</sup>     | 714.37450 | 675.41114 | 0.298 |
| C36H70NO8P  | 1 | [M+K] <sup>+</sup>     | 714.44780 | 675.48391 | 1.040 |
| C36H70NO9P  | 1 | [M+Na] <sup>+</sup>    | 714.46730 | 691.47882 | 1.040 |
| C37H74NO7P  | 2 | [M+K] <sup>+</sup>     | 714.48170 | 675.52029 | 2.440 |
| C39H72NO8P  | 6 | [M+H] <sup>+</sup>     | 714.50660 | 713.49956 | 0.318 |

|              |   |            |           |           |       |
|--------------|---|------------|-----------|-----------|-------|
| C39H74NO8P   | 1 | [M-H]-     | 714.50880 | 715.51521 | 1.206 |
| C38H78NO7P   | 2 | [M+Na]+    | 714.53860 | 691.55159 | 3.098 |
| C40H76NO7P   | 1 | [M+H]+     | 714.54270 | 713.53594 | 0.718 |
| C36H52O13    | 1 | [M+Na]+    | 715.33340 | 692.34080 | 4.729 |
| C33H55NaO13S | 1 | [M+H]+     | 715.33340 | 714.32611 | 0.025 |
| C36H69O10P   | 4 | [M+Na]+    | 715.45460 | 692.46284 | 3.550 |
| C38H67O10P   | 4 | [M+H]+     | 715.45460 | 714.44719 | 0.197 |
| C37H73O9P    | 1 | [M+Na]+    | 715.48570 | 692.49922 | 3.837 |
| C37H75O9P    | 1 | [M-2H+Na]- | 715.49180 | 694.51487 | 3.997 |
| C46H68O6     | 1 | [M-H]-     | 715.49180 | 716.50159 | 3.523 |
| C39H73O9P    | 1 | [M-H]-     | 715.49180 | 716.49922 | 0.215 |
| C38H76O9     | 6 | [M+K]+     | 715.50940 | 676.54894 | 3.754 |
| C37H77N2O6P  | 1 | [M+K]+     | 715.51730 | 676.55193 | 3.108 |
| C47H80O2     | 1 | [M+K]+     | 715.57910 | 676.61583 | 0.166 |
| C38H72NO9P   | 1 | [M-H]-     | 716.48720 | 717.49447 | 0.004 |
| C37H76NO7P   | 1 | [M+K]+     | 716.49600 | 677.53594 | 4.317 |
| C39H76NO8P   | 1 | [M-H]-     | 716.52360 | 717.53086 | 0.017 |
| C39H74NO8P   | 6 | [M+H]+     | 716.52410 | 715.51521 | 2.264 |
| C38H63O8P    | 1 | [M+K]+     | 717.38600 | 678.42606 | 4.473 |
| C36H71O9P    | 4 | [M+K]+     | 717.44490 | 678.48357 | 2.542 |
| C37H64O13    | 3 | [M+H]+     | 717.44490 | 716.43470 | 4.090 |
| C41H65O8P    | 2 | [M+H]+     | 717.44640 | 716.44171 | 3.595 |
| C36H71O10P   | 3 | [M+Na]+    | 717.46800 | 694.47849 | 0.404 |
| C38H69O10P   | 4 | [M+H]+     | 717.47210 | 716.46284 | 2.775 |
| C38H71O10P   | 1 | [M-H]-     | 717.47220 | 718.47849 | 1.367 |
| C47H74O5     | 1 | [M-H]-     | 717.54790 | 718.55363 | 2.152 |
| C37H68NO10P  | 1 | [M+H]+     | 718.46360 | 717.45809 | 2.445 |
| C37H70NO10P  | 1 | [M-H]-     | 718.46660 | 719.47374 | 0.185 |
| C38H72NO9P   | 1 | [M+H]+     | 718.50200 | 717.49447 | 0.358 |
| C38H74NO9P   | 2 | [M-H]-     | 718.50290 | 719.51012 | 0.065 |
| C39H76NO8P   | 6 | [M+H]+     | 718.54030 | 717.53086 | 3.023 |
| C40H80NO7P   | 1 | [M+H]+     | 718.57200 | 717.56724 | 3.497 |
| C34H64O13    | 1 | [M+K]+     | 719.39790 | 680.43470 | 0.075 |
| C35H69O8PS   | 1 | [M+K]+     | 719.40750 | 680.44508 | 1.016 |
| C36H73O9P    | 5 | [M+K]+     | 719.46090 | 680.49922 | 2.049 |
| C41H67O8P    | 1 | [M+H]+     | 719.46200 | 718.45736 | 3.654 |
| C41H69O8P    | 1 | [M-H]-     | 719.46840 | 720.47301 | 3.699 |
| C38H71O10P   | 1 | [M+H]+     | 719.48520 | 718.47849 | 0.777 |
| C38H73O10P   | 1 | [M-H]-     | 719.48670 | 720.49414 | 0.235 |
| C40H75O7P    | 5 | [M-2H+Na]- | 719.49660 | 698.52504 | 3.489 |
| C40H75O7P    | 5 | [M-2H+Na]- | 719.49850 | 698.52504 | 0.848 |
| C40H75O7P    | 5 | [M-2H+Na]- | 719.50210 | 698.52504 | 4.156 |
| C44H74O5     | 4 | [M-2H+K]-  | 719.50210 | 682.55363 | 0.175 |
| C40H75O7P    | 5 | [M-2H+Na]- | 719.50250 | 698.52504 | 4.712 |
| C44H74O5     | 4 | [M-2H+K]-  | 719.50250 | 682.55363 | 0.381 |
| C44H74O5     | 4 | [M-2H+K]-  | 719.50280 | 682.55363 | 0.798 |
| C44H74O5     | 4 | [M-2H+K]-  | 719.50530 | 682.55363 | 4.272 |
| C39H75O9P    | 2 | [M+H]+     | 719.52310 | 718.51487 | 1.329 |
| C45H76O5     | 1 | [M+Na]+    | 719.56020 | 696.56928 | 2.367 |



|             |   |                        |           |           |       |
|-------------|---|------------------------|-----------|-----------|-------|
| C40H79O8P   | 1 | [M+H] <sup>+</sup>     | 719.56020 | 718.55126 | 2.322 |
| C47H74O5    | 1 | [M+H] <sup>+</sup>     | 719.56020 | 718.55363 | 0.967 |
| C40H83N2O6P | 1 | [M+H] <sup>+</sup>     | 719.60380 | 718.59888 | 3.260 |
| C38H68NO8P  | 1 | [M+Na] <sup>+</sup>    | 720.45580 | 697.46826 | 2.329 |
| C39H74NO7P  | 2 | [M-2H+Na] <sup>-</sup> | 720.49650 | 699.52029 | 2.972 |
| C41H72NO7P  | 2 | [M-H] <sup>-</sup>     | 720.49650 | 721.50464 | 1.210 |
| C39H74NO7P  | 2 | [M-2H+Na] <sup>-</sup> | 720.49720 | 699.52029 | 3.943 |
| C41H72NO7P  | 2 | [M-H] <sup>-</sup>     | 720.49720 | 721.50464 | 0.239 |
| C41H86NO6P  | 1 | [M+H] <sup>+</sup>     | 720.62450 | 719.61928 | 2.842 |
| C39H71O7P   | 1 | [M+K] <sup>+</sup>     | 721.45890 | 682.49374 | 2.780 |
| C38H75O10P  | 1 | [M-H] <sup>-</sup>     | 721.50250 | 722.50979 | 0.026 |
| C44H74O5    | 1 | [M+K] <sup>+</sup>     | 721.51370 | 682.55363 | 4.263 |
| C47H76O5    | 1 | [M+H] <sup>+</sup>     | 721.57920 | 720.56928 | 3.678 |
| C46H88O5    | 1 | [M+H] <sup>+</sup>     | 721.67250 | 720.66318 | 2.845 |
| C48H96O3    | 1 | [M+H] <sup>+</sup>     | 721.74010 | 720.73595 | 4.319 |
| C34H59NO15  | 1 | [M+H] <sup>+</sup>     | 722.39530 | 721.38848 | 0.616 |
| C40H68NO8P  | 1 | [M+H] <sup>+</sup>     | 722.47300 | 721.46826 | 3.498 |
| C37H65O10P  | 1 | [M+Na] <sup>+</sup>    | 723.42060 | 700.43154 | 0.221 |
| C40H68O7P2  | 2 | [M+H] <sup>+</sup>     | 723.45210 | 722.44403 | 1.104 |
| C41H71O8P   | 5 | [M+H] <sup>+</sup>     | 723.49390 | 722.48866 | 2.804 |
| C39H73O8P   | 3 | [M+Na] <sup>+</sup>    | 723.49390 | 700.50431 | 0.511 |
| C40H77O7P   | 1 | [M+Na] <sup>+</sup>    | 723.52880 | 700.54069 | 1.541 |
| C39H76N2O7  | 1 | [M+K] <sup>+</sup>     | 723.52880 | 684.56525 | 0.547 |
| C47H78O5    | 1 | [M+H] <sup>+</sup>     | 723.58970 | 722.58493 | 3.449 |
| C40H70NO8P  | 6 | [M+H] <sup>+</sup>     | 724.48990 | 723.48391 | 1.763 |
| C38H72NO8P  | 4 | [M+Na] <sup>+</sup>    | 724.48990 | 701.49956 | 1.549 |
| C41H73NO9   | 2 | [M+H] <sup>+</sup>     | 724.53550 | 723.52854 | 0.421 |
| C36H63O10P  | 1 | [M+K] <sup>+</sup>     | 725.37700 | 686.41589 | 2.811 |
| C40H65O8P   | 1 | [M-2H+Na] <sup>-</sup> | 725.41560 | 704.44171 | 0.241 |
| C35H65O13P  | 1 | [M+H] <sup>+</sup>     | 725.42440 | 724.41628 | 1.166 |
| C39H64O12   | 1 | [M+H] <sup>+</sup>     | 725.44470 | 724.43978 | 3.241 |
| C39H75O8P   | 1 | [M+Na] <sup>+</sup>    | 725.51070 | 702.51996 | 2.095 |
| C41H73O8P   | 1 | [M+H] <sup>+</sup>     | 725.51070 | 724.50431 | 1.212 |
| C40H79O7P   | 1 | [M+Na] <sup>+</sup>    | 725.54630 | 702.55634 | 1.013 |
| C37H70NO9P  | 3 | [M+Na] <sup>+</sup>    | 726.47160 | 703.47882 | 4.896 |
| C40H72NO8P  | 6 | [M+H] <sup>+</sup>     | 726.50560 | 725.49956 | 1.689 |
| C38H74NO8P  | 1 | [M+Na] <sup>+</sup>    | 726.50560 | 703.51521 | 1.612 |
| C38H76NO8P  | 1 | [M-2H+Na] <sup>-</sup> | 726.50810 | 705.53086 | 4.372 |
| C40H74NO8P  | 1 | [M-H] <sup>-</sup>     | 726.50810 | 727.51521 | 0.223 |
| C42H80NO6P  | 1 | [M+H] <sup>+</sup>     | 726.58040 | 725.57233 | 1.104 |
| C39H60O11   | 1 | [M+Na] <sup>+</sup>    | 727.40080 | 704.41357 | 2.732 |
| C40H65O8P   | 1 | [M+Na] <sup>+</sup>    | 727.43130 | 704.44171 | 0.509 |
| C41H69O7P   | 1 | [M+Na] <sup>+</sup>    | 727.46370 | 704.47809 | 4.969 |
| C40H71O9P   | 1 | [M+H] <sup>+</sup>     | 727.49110 | 726.48357 | 0.352 |
| C38H75O9P   | 1 | [M-2H+Na] <sup>-</sup> | 727.49240 | 706.51487 | 4.756 |
| C47H68O6    | 1 | [M-H] <sup>-</sup>     | 727.49240 | 728.50150 | 2.515 |
| C40H73O9P   | 1 | [M-H] <sup>-</sup>     | 727.49240 | 728.49922 | 0.613 |
| C38H77N2O6P | 2 | [M+K] <sup>+</sup>     | 727.51730 | 688.55193 | 3.057 |
| C41H79N2O6P | 1 | [M+H] <sup>+</sup>     | 727.57650 | 726.56758 | 2.273 |

|             |   |                        |           |           |       |
|-------------|---|------------------------|-----------|-----------|-------|
| C38H66NO10P | 3 | [M+H] <sup>+</sup>     | 728.45300 | 727.44244 | 4.521 |
| C37H72NO9P  | 5 | [M+Na] <sup>+</sup>    | 728.48370 | 705.49447 | 0.008 |
| C37H74NO9P  | 1 | [M-2H+Na] <sup>-</sup> | 728.48650 | 707.51012 | 3.172 |
| C39H72NO9P  | 1 | [M-H] <sup>-</sup>     | 728.48650 | 729.49447 | 0.965 |
| C40H76NO8P  | 1 | [M-H] <sup>-</sup>     | 728.52310 | 729.53086 | 0.670 |
| C39H69O10P  | 6 | [M+H] <sup>+</sup>     | 729.46750 | 728.46284 | 3.577 |
| C37H71O10P  | 6 | [M+Na] <sup>+</sup>    | 729.46750 | 706.47849 | 0.288 |
| C41H71O7P   | 1 | [M+Na] <sup>+</sup>    | 729.48590 | 706.49374 | 4.023 |
| C45H72O5    | 1 | [M-2H+K] <sup>-</sup>  | 729.49000 | 692.53798 | 4.694 |
| C38H77O9P   | 1 | [M-2H+Na] <sup>-</sup> | 729.50730 | 708.53052 | 3.715 |
| C40H75O9P   | 1 | [M-H] <sup>-</sup>     | 729.50730 | 730.51487 | 0.417 |
| C38H79N2O6P | 2 | [M+K] <sup>+</sup>     | 729.53300 | 690.56758 | 3.117 |
| C42H81O7P   | 1 | [M+H] <sup>+</sup>     | 729.57870 | 728.57199 | 0.773 |
| C45H86O5    | 1 | [M+Na] <sup>+</sup>    | 729.63340 | 706.64753 | 4.589 |
| C33H57NO15  | 2 | [M+Na] <sup>+</sup>    | 730.36160 | 707.37283 | 0.611 |
| C36H70NO10P | 4 | [M+Na] <sup>+</sup>    | 730.46100 | 707.47374 | 2.680 |
| C38H68NO10P | 2 | [M+H] <sup>+</sup>     | 730.46470 | 729.45809 | 0.899 |
| C38H70NO10P | 1 | [M-H] <sup>-</sup>     | 730.46770 | 731.47374 | 1.688 |
| C39H74NO9P  | 2 | [M-H] <sup>-</sup>     | 730.50380 | 731.51012 | 1.296 |
| C38H78NO7P  | 1 | [M+K] <sup>+</sup>     | 730.51680 | 691.55159 | 2.816 |
| C43H72NO6P  | 1 | [M+H] <sup>+</sup>     | 730.51680 | 729.50973 | 0.270 |
| C40H78NO8P  | 1 | [M-H] <sup>-</sup>     | 730.53990 | 731.54651 | 0.906 |
| C40H76NO8P  | 3 | [M+H] <sup>+</sup>     | 730.54000 | 729.53086 | 2.562 |
| C42H84NO6P  | 1 | [M+H] <sup>+</sup>     | 730.61110 | 729.60363 | 0.276 |
| C42H67O8P   | 1 | [M+H] <sup>+</sup>     | 731.46530 | 730.45736 | 0.917 |
| C39H71O10P  | 3 | [M+H] <sup>+</sup>     | 731.48380 | 730.47849 | 2.678 |
| C37H73O10P  | 3 | [M+Na] <sup>+</sup>    | 731.48380 | 708.49414 | 0.602 |
| C39H73O10P  | 1 | [M-H] <sup>-</sup>     | 731.48660 | 732.49414 | 0.368 |
| C46H66O7    | 2 | [M+H] <sup>+</sup>     | 731.48940 | 730.48086 | 1.742 |
| C38H77O9P   | 1 | [M+Na] <sup>+</sup>    | 731.51640 | 708.53052 | 4.573 |
| C42H83O7P   | 1 | [M+H] <sup>+</sup>     | 731.59140 | 730.58764 | 4.803 |
| C36H72NO9P  | 6 | [M+K] <sup>+</sup>     | 732.45640 | 693.49447 | 1.670 |
| C41H66NO8P  | 5 | [M+H] <sup>+</sup>     | 732.45640 | 731.45261 | 4.747 |
| C38H72NO10P | 1 | [M-H] <sup>-</sup>     | 732.48180 | 733.48939 | 0.434 |
| C39H76NO9P  | 2 | [M-H] <sup>-</sup>     | 732.51830 | 733.52577 | 0.277 |
| C39H74NO9P  | 1 | [M+H] <sup>+</sup>     | 732.51910 | 731.51012 | 2.330 |
| C40H78NO8P  | 3 | [M+H] <sup>+</sup>     | 732.55470 | 731.54651 | 1.259 |
| C36H71O10P  | 1 | [M+K] <sup>+</sup>     | 733.44440 | 694.47849 | 3.764 |
| C39H75O10P  | 1 | [M-H] <sup>-</sup>     | 733.50340 | 734.50979 | 1.201 |
| C40H77O9P   | 1 | [M+H] <sup>+</sup>     | 733.53450 | 732.53052 | 4.491 |
| C47H88O5    | 1 | [M+H] <sup>+</sup>     | 733.66690 | 732.66318 | 4.835 |
| C38H66NO8P  | 3 | [M+K] <sup>+</sup>     | 734.41490 | 695.45261 | 1.167 |
| C39H70NO7P  | 3 | [M+K] <sup>+</sup>     | 734.45020 | 695.48899 | 2.644 |
| C41H68NO8P  | 6 | [M+H] <sup>+</sup>     | 734.47200 | 733.46826 | 4.802 |
| C38H72NO10P | 3 | [M+H] <sup>+</sup>     | 734.49460 | 733.48939 | 2.802 |
| C40H76NO7P  | 1 | [M-2H+Na] <sup>-</sup> | 734.51170 | 713.53594 | 2.302 |
| C39H76NO9P  | 1 | [M+H] <sup>+</sup>     | 734.53420 | 733.52577 | 1.575 |
| C40H80NO8P  | 3 | [M+H] <sup>+</sup>     | 734.57240 | 733.56216 | 4.046 |
| C46H64O6    | 1 | [M+Na] <sup>+</sup>    | 735.45750 | 712.47029 | 2.736 |

|             |   |                        |           |           |       |
|-------------|---|------------------------|-----------|-----------|-------|
| C42H71O8P   | 2 | [M+H] <sup>+</sup>     | 735.49280 | 734.48866 | 4.254 |
| C47H68O5    | 1 | [M+Na] <sup>+</sup>    | 735.49280 | 712.50668 | 4.211 |
| C40H73O8P   | 1 | [M+Na] <sup>+</sup>    | 735.49280 | 712.50431 | 0.993 |
| C39H75O10P  | 2 | [M+H] <sup>+</sup>     | 735.51380 | 734.50979 | 4.431 |
| C43H75O7P   | 1 | [M+H] <sup>+</sup>     | 735.53520 | 734.52504 | 3.924 |
| C40H79O9P   | 1 | [M+H] <sup>+</sup>     | 735.55190 | 734.54617 | 2.099 |
| C39H72NO7P  | 1 | [M+K] <sup>+</sup>     | 736.46830 | 697.50464 | 0.690 |
| C41H70NO8P  | 5 | [M+H] <sup>+</sup>     | 736.48870 | 735.48391 | 3.363 |
| C39H78NO9P  | 1 | [M+H] <sup>+</sup>     | 736.54680 | 735.54142 | 2.570 |
| C40H75O7P   | 2 | [M+K] <sup>+</sup>     | 737.49040 | 698.52504 | 2.991 |
| C40H75O8P   | 1 | [M+Na] <sup>+</sup>    | 737.50720 | 714.51996 | 2.685 |
| C39H77O8PS  | 1 | [M+H] <sup>+</sup>     | 737.51530 | 736.50768 | 0.473 |
| C47H92O5    | 1 | [M+H] <sup>+</sup>     | 737.70530 | 736.69448 | 4.816 |
| C36H62NO10P | 1 | [M+K] <sup>+</sup>     | 738.37330 | 699.41114 | 1.337 |
| C37H66NO10P | 1 | [M+Na] <sup>+</sup>    | 738.43060 | 715.44244 | 1.433 |
| C39H74NO7P  | 2 | [M+K] <sup>+</sup>     | 738.48380 | 699.52029 | 0.483 |
| C41H72NO8P  | 6 | [M+H] <sup>+</sup>     | 738.50560 | 737.49956 | 1.661 |
| C39H74NO8P  | 1 | [M+Na] <sup>+</sup>    | 738.50560 | 715.51521 | 1.586 |
| C40H67O10P  | 3 | [M+H] <sup>+</sup>     | 739.45090 | 738.44719 | 4.813 |
| C46H68O6    | 2 | [M+Na] <sup>+</sup>    | 739.49440 | 716.50159 | 4.852 |
| C39H77N2O6P | 1 | [M+K] <sup>+</sup>     | 739.51160 | 700.55193 | 4.700 |
| C41H80O8    | 1 | [M+K] <sup>+</sup>     | 739.54820 | 700.58532 | 0.366 |
| C43H79O7P   | 1 | [M+H] <sup>+</sup>     | 739.56090 | 738.55634 | 3.670 |
| C41H81O7P   | 1 | [M+Na] <sup>+</sup>    | 739.56090 | 716.57199 | 0.426 |
| C40H81N2O6P | 1 | [M+Na] <sup>+</sup>    | 739.56910 | 716.58323 | 4.526 |
| C49H80O2    | 1 | [M+K] <sup>+</sup>     | 739.58060 | 700.61583 | 2.189 |
| C46H84O5    | 1 | [M+Na] <sup>+</sup>    | 739.62040 | 716.63188 | 0.942 |
| C38H72NO9P  | 1 | [M+Na] <sup>+</sup>    | 740.48360 | 717.49447 | 0.127 |
| C38H74NO9P  | 2 | [M-2H+Na] <sup>-</sup> | 740.48760 | 719.51012 | 4.606 |
| C40H72NO9P  | 1 | [M-H] <sup>-</sup>     | 740.48760 | 741.49447 | 0.536 |
| C40H70NO9P  | 2 | [M+H] <sup>+</sup>     | 740.48850 | 739.47882 | 3.252 |
| C39H76NO7P  | 4 | [M+K] <sup>+</sup>     | 740.50100 | 701.53594 | 2.575 |
| C41H74NO8P  | 6 | [M+H] <sup>+</sup>     | 740.52130 | 739.51521 | 1.591 |
| C39H76NO8P  | 1 | [M+Na] <sup>+</sup>    | 740.52130 | 717.53086 | 1.649 |
| C41H76NO8P  | 2 | [M-H] <sup>-</sup>     | 740.52340 | 741.53086 | 0.254 |
| C39H78NO8P  | 1 | [M-2H+Na] <sup>-</sup> | 740.52340 | 719.54651 | 3.816 |
| C40H80NO6P  | 2 | [M+K] <sup>+</sup>     | 740.53470 | 701.57233 | 1.051 |
| C40H79NO8   | 2 | [M+K] <sup>+</sup>     | 740.54230 | 701.58057 | 1.918 |
| C42H78NO7P  | 1 | [M+H] <sup>+</sup>     | 740.56230 | 739.55159 | 4.641 |
| C43H65O8P   | 1 | [M+H] <sup>+</sup>     | 741.44700 | 740.44171 | 2.669 |
| C41H67O8P   | 1 | [M+Na] <sup>+</sup>    | 741.44700 | 718.45736 | 0.566 |
| C40H69O10P  | 5 | [M+H] <sup>+</sup>     | 741.47070 | 740.46284 | 0.797 |
| C38H71O10P  | 4 | [M+Na] <sup>+</sup>    | 741.47070 | 718.47849 | 4.033 |
| C37H73O12P  | 1 | [M+H] <sup>+</sup>     | 741.49400 | 740.48397 | 3.724 |
| C43H74O7    | 1 | [M+K] <sup>+</sup>     | 741.50930 | 702.54346 | 3.633 |
| C39H79N2O6P | 1 | [M+K] <sup>+</sup>     | 741.52710 | 702.56758 | 4.890 |
| C42H77O8P   | 2 | [M+H] <sup>+</sup>     | 741.53960 | 740.53561 | 4.422 |
| C47H74O5    | 1 | [M+Na] <sup>+</sup>    | 741.54420 | 718.55363 | 1.825 |
| C51H74O2    | 1 | [M+Na] <sup>+</sup>    | 741.55450 | 718.56888 | 4.857 |

|             |   |            |           |           |       |
|-------------|---|------------|-----------|-----------|-------|
| C37H70NO10P | 1 | [M+Na]+    | 742.45940 | 719.47374 | 4.792 |
| C39H68NO10P | 1 | [M+H]+     | 742.46850 | 741.45809 | 4.233 |
| C40H72NO9P  | 1 | [M+H]+     | 742.50030 | 741.49447 | 1.943 |
| C38H74NO9P  | 1 | [M+Na]+    | 742.50030 | 719.51012 | 1.288 |
| C38H76NO9P  | 1 | [M-2H+Na]- | 742.50260 | 721.52577 | 3.719 |
| C40H74NO9P  | 1 | [M-H]-     | 742.50260 | 743.51012 | 0.341 |
| C39H78NO7P  | 1 | [M+K]+     | 742.51270 | 703.55159 | 2.751 |
| C41H78NO8P  | 1 | [M-H]-     | 742.53890 | 743.54651 | 0.455 |
| C41H76NO8P  | 2 | [M+H]+     | 742.53990 | 741.53086 | 2.386 |
| C41H77NO10  | 1 | [M-H]-     | 742.54990 | 743.55475 | 3.259 |
| C40H84NO6P  | 1 | [M-2H+K]-  | 742.54990 | 705.60363 | 3.135 |
| C41H86NO6P  | 1 | [M+Na]+    | 742.61170 | 719.61928 | 4.310 |
| C41H69O7P   | 1 | [M+K]+     | 743.44060 | 704.47809 | 0.866 |
| C43H67O8P   | 1 | [M+H]+     | 743.46750 | 742.45736 | 3.862 |
| C40H71O10P  | 6 | [M+H]+     | 743.48330 | 742.47849 | 3.307 |
| C38H73O10P  | 5 | [M+Na]+    | 743.48330 | 720.49414 | 0.081 |
| C39H77O8P   | 2 | [M+K]+     | 743.49830 | 704.53561 | 0.617 |
| C47H76O4    | 1 | [M+K]+     | 743.53410 | 704.57436 | 4.588 |
| C40H81O7P   | 1 | [M+K]+     | 743.53410 | 704.57199 | 1.404 |
| C40H68NO8P  | 2 | [M+Na]+    | 744.45950 | 721.46826 | 2.716 |
| C37H72NO10P | 1 | [M+Na]+    | 744.47690 | 721.48939 | 2.296 |
| C41H73NO8   | 1 | [M-2H+K]-  | 744.48190 | 707.53362 | 0.430 |
| C39H72NO10P | 1 | [M-H]-     | 744.48190 | 745.48939 | 0.293 |
| C38H76NO8P  | 2 | [M+K]+     | 744.49040 | 705.53086 | 4.846 |
| C41H72NO7P  | 2 | [M+Na]+    | 744.49040 | 721.50464 | 4.651 |
| C40H76NO9P  | 2 | [M-H]-     | 744.51900 | 745.52577 | 0.668 |
| C39H80NO7P  | 1 | [M+K]+     | 744.52840 | 705.56724 | 2.677 |
| C41H78NO8P  | 5 | [M+H]+     | 744.55620 | 743.54651 | 3.253 |
| C41H80NO8P  | 1 | [M-H]-     | 744.55620 | 745.56216 | 1.762 |
| C41H77NO10  | 1 | [M+H]+     | 744.55840 | 743.55475 | 4.862 |
| C40H84NO6P  | 1 | [M+K]+     | 744.56840 | 705.60363 | 2.178 |
| C40H67O8P   | 3 | [M+K]+     | 745.42150 | 706.45736 | 1.329 |
| C46H64O8    | 1 | [M+H]+     | 745.46630 | 744.46012 | 1.464 |
| C38H75O9P   | 2 | [M+K]+     | 745.47450 | 706.51487 | 4.727 |
| C41H71O8P   | 1 | [M+Na]+    | 745.47450 | 722.48866 | 4.534 |
| C43H69O8P   | 2 | [M+H]+     | 745.47850 | 744.47301 | 2.386 |
| C43H71O8P   | 1 | [M-H]-     | 745.48440 | 746.48866 | 4.039 |
| C40H73O10P  | 5 | [M+H]+     | 745.50180 | 744.49414 | 0.524 |
| C38H75O10P  | 4 | [M+Na]+    | 745.50180 | 722.50979 | 3.742 |
| C47H70O7    | 2 | [M-H]-     | 745.50190 | 746.51210 | 3.930 |
| C40H75O10P  | 1 | [M-H]-     | 745.50190 | 746.50979 | 0.830 |
| C47H70O7    | 2 | [M-H]-     | 745.50850 | 746.51210 | 4.923 |
| C41H77O9P   | 1 | [M+H]+     | 745.53460 | 744.53052 | 4.284 |
| C39H79O9P   | 1 | [M+Na]+    | 745.53460 | 722.54617 | 1.066 |
| C42H85N2O6P | 1 | [M+H]+     | 745.62450 | 744.61453 | 3.627 |
| C49H86O2    | 1 | [M+K]+     | 745.62450 | 706.66278 | 1.919 |
| C37H74NO9P  | 5 | [M+K]+     | 746.47210 | 707.51012 | 1.571 |
| C39H74NO10P | 1 | [M-H]-     | 746.50130 | 747.50504 | 4.731 |
| C41H74NO7P  | 1 | [M+Na]+    | 746.50620 | 723.52029 | 4.439 |

|             |   |            |           |           |       |
|-------------|---|------------|-----------|-----------|-------|
| C41H76NO7P  | 1 | [M-2H+Na]- | 746.51320 | 725.53594 | 4.275 |
| C43H74NO7P  | 1 | [M-H]-     | 746.51320 | 747.52029 | 0.237 |
| C43H72NO7P  | 1 | [M+H]+     | 746.51350 | 745.50464 | 2.127 |
| C42H84NO7P  | 1 | [M+H]+     | 746.60270 | 745.59854 | 4.170 |
| C37H73O10P  | 2 | [M+K]+     | 747.45680 | 708.49414 | 0.654 |
| C41H73O7P   | 1 | [M+K]+     | 747.47450 | 708.50939 | 2.617 |
| C46H66O8    | 1 | [M+H]+     | 747.48200 | 746.47577 | 1.393 |
| C43H73O8P   | 1 | [M-H]-     | 747.50060 | 748.50431 | 4.764 |
| C40H77O10P  | 1 | [M-H]-     | 747.51930 | 748.52544 | 1.513 |
| C49H74O4    | 4 | [M-2H+Na]- | 747.53410 | 726.55871 | 1.770 |
| C46H78O5    | 4 | [M-2H+K]-  | 747.53410 | 710.58493 | 0.768 |
| C49H74O4    | 4 | [M-2H+Na]- | 747.53490 | 726.55871 | 2.840 |
| C46H78O5    | 4 | [M-2H+K]-  | 747.53490 | 710.58493 | 1.838 |
| C49H74O4    | 4 | [M-2H+Na]- | 747.53500 | 726.55871 | 2.974 |
| C46H78O5    | 4 | [M-2H+K]-  | 747.53500 | 710.58493 | 1.972 |
| C49H74O4    | 4 | [M-2H+Na]- | 747.53650 | 726.55871 | 4.980 |
| C46H78O5    | 4 | [M-2H+K]-  | 747.53650 | 710.58493 | 3.978 |
| C47H80O5    | 1 | [M+Na]+    | 747.59120 | 724.60058 | 1.877 |
| C42H83O8P   | 1 | [M+H]+     | 747.59120 | 746.58256 | 1.834 |
| C42H70NO8P  | 6 | [M+H]+     | 748.48780 | 747.48391 | 4.512 |
| C43H76NO7P  | 1 | [M-H]-     | 748.52710 | 749.53594 | 2.101 |
| C41H78NO7P  | 1 | [M-2H+Na]- | 748.52710 | 727.55159 | 1.925 |
| C41H76NO7P  | 2 | [M+Na]+    | 748.52800 | 725.53594 | 3.789 |
| C43H74NO7P  | 2 | [M+H]+     | 748.52800 | 747.52029 | 0.584 |
| C42H86NO7P  | 1 | [M+H]+     | 748.61790 | 747.61419 | 4.759 |
| C35H67O13P  | 1 | [M+Na]+    | 749.41930 | 726.43193 | 2.475 |
| C39H67O10P  | 2 | [M+Na]+    | 749.43700 | 726.44719 | 0.787 |
| C41H75O7P   | 5 | [M+K]+     | 749.49130 | 710.52504 | 4.144 |
| C41H75O8P   | 1 | [M+Na]+    | 749.50600 | 726.51996 | 4.243 |
| C40H77O10P  | 1 | [M+H]+     | 749.53040 | 748.52544 | 3.081 |
| C40H79O10P  | 1 | [M-H]-     | 749.53110 | 750.54109 | 3.628 |
| C49H74O4    | 1 | [M+Na]+    | 749.54820 | 726.55871 | 0.358 |
| C46H78O5    | 1 | [M+K]+     | 749.54820 | 710.58493 | 0.165 |
| C43H76NO7P  | 2 | [M+H]+     | 750.54390 | 749.53594 | 0.915 |
| C41H78NO7P  | 1 | [M+Na]+    | 750.54390 | 727.55159 | 4.112 |
| C44H89NO5   | 1 | [M+K]+     | 750.63440 | 711.67408 | 3.763 |
| C37H67O13P  | 1 | [M+H]+     | 751.43760 | 750.43193 | 2.135 |
| C40H73O8P   | 1 | [M+K]+     | 751.46990 | 712.50431 | 3.248 |
| C47H68O5    | 1 | [M+K]+     | 751.46990 | 712.50668 | 0.098 |
| C46H80O5    | 1 | [M+K]+     | 751.56470 | 712.60058 | 1.296 |
| C41H81N2O6P | 1 | [M+Na]+    | 751.57120 | 728.58323 | 1.659 |
| C47H84O5    | 2 | [M+Na]+    | 751.61980 | 728.63188 | 1.726 |
| C40H66NO10P | 2 | [M+H]+     | 752.45140 | 751.44244 | 2.250 |
| C39H72NO9P  | 2 | [M+Na]+    | 752.48420 | 729.49447 | 0.672 |
| C42H74NO8P  | 6 | [M+H]+     | 752.52220 | 751.51521 | 0.369 |
| C40H76NO8P  | 4 | [M+Na]+    | 752.52220 | 729.53086 | 2.819 |
| C42H83NO8   | 1 | [M+Na]+    | 752.60420 | 729.61187 | 4.131 |
| C44H81NO8   | 1 | [M+H]+     | 752.60420 | 751.59622 | 0.943 |
| C37H69O13P  | 1 | [M+H]+     | 753.45760 | 752.44758 | 3.645 |

|             |   |            |           |           |       |
|-------------|---|------------|-----------|-----------|-------|
| C39H71O10P  | 1 | [M+Na]+    | 753.46470 | 730.47849 | 3.995 |
| C47H70O5    | 2 | [M+K]+     | 753.48710 | 714.52233 | 2.155 |
| C41H79O7P   | 1 | [M+K]+     | 753.51640 | 714.55634 | 4.106 |
| C40H68NO10P | 1 | [M+H]+     | 754.46780 | 753.45809 | 3.238 |
| C39H74NO9P  | 3 | [M+Na]+    | 754.49990 | 731.51012 | 0.737 |
| C39H76NO9P  | 2 | [M-2H+Na]- | 754.50290 | 733.52577 | 4.057 |
| C42H76NO8P  | 6 | [M+H]+     | 754.53770 | 753.53086 | 0.567 |
| C40H78NO8P  | 2 | [M+Na]+    | 754.53770 | 731.54651 | 2.612 |
| C42H78NO8P  | 1 | [M-H]-     | 754.54050 | 755.54651 | 1.673 |
| C42H86NO6P  | 2 | [M+Na]+    | 754.60550 | 731.61928 | 3.974 |
| C44H84NO6P  | 1 | [M+H]+     | 754.61250 | 753.60363 | 2.123 |
| C42H69O8P   | 1 | [M+Na]+    | 755.46480 | 732.47301 | 3.402 |
| C37H72O11P2 | 1 | [M+H]+     | 755.46480 | 754.45499 | 3.361 |
| C39H73O9P   | 1 | [M+K]+     | 755.46480 | 716.49922 | 3.211 |
| C37H71O13P  | 1 | [M+H]+     | 755.47080 | 754.46323 | 0.392 |
| C41H71O10P  | 6 | [M+H]+     | 755.48390 | 754.47849 | 2.461 |
| C39H73O10P  | 6 | [M+Na]+    | 755.48390 | 732.49414 | 0.715 |
| C40H77O8P   | 2 | [M+K]+     | 755.50060 | 716.53561 | 2.437 |
| C47H72O5    | 2 | [M+K]+     | 755.50060 | 716.53798 | 0.696 |
| C43H73O7P   | 1 | [M+Na]+    | 755.50060 | 732.50939 | 2.627 |
| C38H75O12P  | 1 | [M+H]+     | 755.50970 | 754.49962 | 3.721 |
| C40H81N2O6P | 1 | [M+K]+     | 755.54370 | 716.58323 | 3.542 |
| C43H79O8P   | 1 | [M+H]+     | 755.56130 | 754.55126 | 3.667 |
| C43H83N2O6P | 1 | [M+H]+     | 755.60870 | 754.59888 | 3.380 |
| C41H68NO8P  | 1 | [M+Na]+    | 756.45770 | 733.46826 | 0.293 |
| C40H70NO10P | 2 | [M+H]+     | 756.48280 | 755.47374 | 2.370 |
| C39H78NO9P  | 1 | [M-2H+Na]- | 756.51780 | 735.54142 | 3.055 |
| C41H76NO9P  | 1 | [M-H]-     | 756.51780 | 757.52577 | 0.929 |
| C39H76NO9P  | 3 | [M+Na]+    | 756.51870 | 733.52577 | 4.899 |
| C42H78NO8P  | 3 | [M+H]+     | 756.55410 | 755.54651 | 0.426 |
| C42H80NO8P  | 1 | [M-H]-     | 756.55490 | 757.56216 | 0.016 |
| C42H88NO6P  | 1 | [M+Na]+    | 756.62580 | 733.63493 | 2.182 |
| C44H88NO6P  | 2 | [M-H]-     | 756.63020 | 757.63493 | 3.360 |
| C39H75O9P   | 1 | [M+K]+     | 757.47430 | 718.51487 | 4.916 |
| C41H73O10P  | 6 | [M+H]+     | 757.49900 | 756.49414 | 3.180 |
| C39H75O10P  | 5 | [M+Na]+    | 757.50100 | 734.50979 | 2.627 |
| C51H74O2    | 1 | [M+K]+     | 757.53550 | 718.56888 | 4.579 |
| C42H77O9P   | 1 | [M+H]+     | 757.53550 | 756.53052 | 3.028 |
| C46H86O5    | 1 | [M+K]+     | 757.60860 | 718.64753 | 2.742 |
| C43H68NO8P  | 4 | [M+H]+     | 758.47550 | 757.46826 | 0.036 |
| C41H70NO8P  | 2 | [M+Na]+    | 758.47550 | 735.48391 | 3.127 |
| C38H74NO9P  | 2 | [M+K]+     | 758.47550 | 719.51012 | 2.936 |
| C40H74NO10P | 1 | [M-H]-     | 758.49840 | 759.50504 | 0.833 |
| C39H78NO8P  | 2 | [M+K]+     | 758.50920 | 719.54651 | 0.604 |
| C41H78NO9P  | 2 | [M-H]-     | 758.53490 | 759.54142 | 0.985 |
| C42H80NO8P  | 1 | [M+H]+     | 758.57260 | 757.56216 | 4.182 |
| C43H84NO7P  | 2 | [M+H]+     | 758.60860 | 757.59854 | 3.674 |
| C44H88NO6P  | 1 | [M+H]+     | 758.64590 | 757.63493 | 4.880 |
| C38H73O10P  | 1 | [M+K]+     | 759.46000 | 720.49414 | 3.570 |

|             |   |            |           |           |       |
|-------------|---|------------|-----------|-----------|-------|
| C41H77O10P  | 1 | [M-H]-     | 759.51900 | 760.52544 | 1.094 |
| C43H77O7P   | 1 | [M+Na]+    | 759.53310 | 736.54069 | 4.193 |
| C40H68NO8P  | 1 | [M+K]+     | 760.43070 | 721.46826 | 0.930 |
| C37H72NO10P | 3 | [M+K]+     | 760.45080 | 721.48939 | 2.285 |
| C41H73NO9   | 1 | [M-2H+K]-  | 760.47630 | 723.52854 | 1.098 |
| C43H70NO8P  | 6 | [M+H]+     | 760.48800 | 759.48391 | 4.178 |
| C38H76NO9P  | 6 | [M+K]+     | 760.48800 | 721.52577 | 1.214 |
| C40H76NO10P | 1 | [M-H]-     | 760.51280 | 761.52069 | 0.813 |
| C42H76NO7P  | 1 | [M+Na]+    | 760.52450 | 737.53594 | 0.873 |
| C42H82NO8P  | 3 | [M+H]+     | 760.58810 | 759.57781 | 3.973 |
| C40H68O7P2  | 1 | [M+K]+     | 761.40940 | 722.44403 | 2.914 |
| C36H67O13P  | 1 | [M+Na]+    | 761.42290 | 738.43193 | 2.292 |
| C40H66O12   | 1 | [M+Na]+    | 761.44480 | 738.45543 | 0.194 |
| C41H79O10P  | 2 | [M-H]-     | 761.53430 | 762.54109 | 0.632 |
| C41H79O10P  | 2 | [M-H]-     | 761.53650 | 762.54109 | 3.521 |
| C42H81O9P   | 1 | [M+H]+     | 761.57000 | 760.56182 | 1.190 |
| C39H66NO10P | 1 | [M+Na]+    | 762.42990 | 739.44244 | 2.306 |
| C40H70NO9P  | 1 | [M+Na]+    | 762.46550 | 739.47882 | 3.335 |
| C41H73NO9   | 3 | [M+K]+     | 762.49210 | 723.52854 | 0.544 |
| C41H76NO8P  | 2 | [M-2H+Na]- | 762.50220 | 741.53086 | 3.572 |
| C43H72NO8P  | 6 | [M+H]+     | 762.50330 | 761.49956 | 4.626 |
| C40H76NO10P | 1 | [M+H]+     | 762.52650 | 761.52069 | 1.912 |
| C42H84NO8P  | 1 | [M+H]+     | 762.60050 | 761.59346 | 0.299 |
| C39H64O13   | 1 | [M+Na]+    | 763.42230 | 740.43470 | 2.118 |
| C40H69O10P  | 1 | [M+Na]+    | 763.44970 | 740.46284 | 3.091 |
| C42H67O10P  | 5 | [M+H]+     | 763.45200 | 762.44719 | 3.221 |
| C41H79N2O6P | 1 | [M-2H+K]-  | 763.51310 | 726.56758 | 4.029 |
| C43H81O7P   | 1 | [M+Na]+    | 763.56380 | 740.57199 | 3.385 |
| C45H79O7P   | 1 | [M+H]+     | 763.56380 | 762.55634 | 0.244 |
| C47H80O5    | 1 | [M+K]+     | 763.56380 | 724.60058 | 0.097 |
| C41H75NO9   | 5 | [M+K]+     | 764.50950 | 725.54419 | 2.832 |
| C41H76NO8P  | 2 | [M+Na]+    | 764.52120 | 741.53086 | 1.466 |
| C43H74NO8P  | 3 | [M+H]+     | 764.52220 | 763.51521 | 0.364 |
| C41H64O13   | 1 | [M+H]+     | 765.43860 | 764.43470 | 4.397 |
| C38H69O13P  | 1 | [M+H]+     | 765.45470 | 764.44758 | 0.201 |
| C38H68O15   | 2 | [M+H]+     | 765.46600 | 764.45583 | 3.794 |
| C42H69O10P  | 6 | [M+H]+     | 765.46700 | 764.46284 | 4.062 |
| C41H75O8P   | 1 | [M+K]+     | 765.48090 | 726.51996 | 2.886 |
| C41H79N2O6P | 1 | [M+K]+     | 765.53190 | 726.56758 | 1.534 |
| C42H85O9P   | 1 | [M+H]+     | 765.60140 | 764.59312 | 1.314 |
| C39H70NO10P | 1 | [M+Na]+    | 766.46040 | 743.47374 | 3.337 |
| C40H74NO9P  | 1 | [M+Na]+    | 766.50210 | 743.51012 | 3.596 |
| C42H72NO9P  | 1 | [M+H]+     | 766.50210 | 765.49447 | 0.466 |
| C43H76NO8P  | 6 | [M+H]+     | 766.53700 | 765.53086 | 1.472 |
| C41H78NO8P  | 1 | [M+Na]+    | 766.53700 | 743.54651 | 1.658 |
| C42H82NO6P  | 2 | [M+K]+     | 766.54880 | 727.58798 | 3.037 |
| C42H81NO8   | 1 | [M+K]+     | 766.55640 | 727.59622 | 3.874 |
| C44H80NO7P  | 1 | [M+H]+     | 766.57180 | 765.56724 | 3.539 |
| C42H82NO7P  | 1 | [M+Na]+    | 766.57180 | 743.58289 | 0.410 |

|             |   |                        |           |           |       |
|-------------|---|------------------------|-----------|-----------|-------|
| C38H54O16   | 1 | [M+H] <sup>+</sup>     | 767.34730 | 766.34119 | 1.513 |
| C40H73O9P   | 1 | [M+K] <sup>+</sup>     | 767.45980 | 728.49922 | 3.354 |
| C45H66O10   | 5 | [M+H] <sup>+</sup>     | 767.47360 | 766.46560 | 0.950 |
| C38H71O13P  | 3 | [M+H] <sup>+</sup>     | 767.47360 | 766.46323 | 4.034 |
| C42H71O10P  | 5 | [M+H] <sup>+</sup>     | 767.48560 | 766.47849 | 0.207 |
| C40H73O10P  | 1 | [M+Na] <sup>+</sup>    | 767.48560 | 744.49414 | 2.919 |
| C41H77O9P   | 1 | [M+Na] <sup>+</sup>    | 767.51670 | 744.53052 | 3.967 |
| C41H81N2O6P | 1 | [M+K] <sup>+</sup>     | 767.54310 | 728.58323 | 4.268 |
| C42H81O8P   | 1 | [M+Na] <sup>+</sup>    | 767.55370 | 744.56691 | 3.166 |
| C55H90O     | 1 | [M+H] <sup>+</sup>     | 767.70360 | 766.69917 | 3.695 |
| C42H59N5O6  | 1 | [M+K] <sup>+</sup>     | 768.40980 | 729.44654 | 0.150 |
| C39H74NO9P  | 2 | [M-2H+K] <sup>-</sup>  | 768.45750 | 731.51012 | 1.591 |
| C42H70NO8P  | 1 | [M-2H+Na] <sup>-</sup> | 768.45750 | 747.48391 | 0.616 |
| C41H70NO10P | 1 | [M+H] <sup>+</sup>     | 768.48420 | 767.47374 | 4.155 |
| C43H72NO7P  | 2 | [M+Na] <sup>+</sup>    | 768.49560 | 745.50464 | 2.260 |
| C40H78NO9P  | 1 | [M-2H+Na] <sup>-</sup> | 768.51720 | 747.54142 | 2.226 |
| C42H76NO9P  | 1 | [M-H] <sup>-</sup>     | 768.51720 | 769.52577 | 1.695 |
| C40H76NO9P  | 3 | [M+Na] <sup>+</sup>    | 768.51840 | 745.52577 | 4.432 |
| C42H74NO9P  | 3 | [M+H] <sup>+</sup>     | 768.51840 | 767.51012 | 1.310 |
| C41H80NO7P  | 1 | [M+K] <sup>+</sup>     | 768.53330 | 729.56724 | 3.783 |
| C43H78NO8P  | 5 | [M+H] <sup>+</sup>     | 768.55480 | 767.54651 | 1.330 |
| C41H80NO8P  | 4 | [M+Na] <sup>+</sup>    | 768.55480 | 745.56216 | 4.451 |
| C45H86NO6P  | 2 | [M+H] <sup>+</sup>     | 768.62840 | 767.61928 | 2.409 |
| C40H75O9P   | 1 | [M+K] <sup>+</sup>     | 769.47500 | 730.51487 | 3.930 |
| C43H71O8P   | 1 | [M+Na] <sup>+</sup>    | 769.47500 | 746.48866 | 3.743 |
| C45H68O10   | 1 | [M+H] <sup>+</sup>     | 769.48700 | 768.48125 | 1.977 |
| C43H70O10   | 1 | [M+Na] <sup>+</sup>    | 769.48700 | 746.49690 | 1.141 |
| C38H73O13P  | 1 | [M+H] <sup>+</sup>     | 769.48700 | 768.47888 | 1.099 |
| C42H73O10P  | 6 | [M+H] <sup>+</sup>     | 769.49960 | 768.49414 | 2.351 |
| C40H75O10P  | 5 | [M+Na] <sup>+</sup>    | 769.49960 | 746.50979 | 0.767 |
| C41H79O8P   | 1 | [M+K] <sup>+</sup>     | 769.51610 | 730.55126 | 2.197 |
| C42H70NO8P  | 1 | [M+Na] <sup>+</sup>    | 770.47450 | 747.48391 | 1.781 |
| C41H74NO10P | 1 | [M-H] <sup>-</sup>     | 770.49880 | 771.50504 | 1.339 |
| C40H78NO8P  | 1 | [M+K] <sup>+</sup>     | 770.50610 | 731.54651 | 4.618 |
| C43H74NO7P  | 2 | [M+Na] <sup>+</sup>    | 770.50670 | 747.52029 | 3.652 |
| C46H73N3O4  | 1 | [M+K] <sup>+</sup>     | 770.52400 | 731.56011 | 0.964 |
| C40H78NO9P  | 1 | [M+Na] <sup>+</sup>    | 770.53330 | 747.54142 | 3.447 |
| C42H76NO9P  | 1 | [M+H] <sup>+</sup>     | 770.53330 | 769.52577 | 0.334 |
| C42H78NO9P  | 1 | [M-H] <sup>-</sup>     | 770.53520 | 771.54142 | 1.359 |
| C43H80NO8P  | 1 | [M+H] <sup>+</sup>     | 770.57230 | 769.56216 | 3.727 |
| C43H73O7P   | 1 | [M+K] <sup>+</sup>     | 771.47320 | 732.50939 | 0.850 |
| C40H77O9P   | 3 | [M+K] <sup>+</sup>     | 771.49070 | 732.53052 | 3.855 |
| C43H73O8P   | 3 | [M+Na] <sup>+</sup>    | 771.49070 | 748.50431 | 3.668 |
| C45H71O8P   | 2 | [M+H] <sup>+</sup>     | 771.49890 | 770.48866 | 3.851 |
| C45H70O10   | 2 | [M+H] <sup>+</sup>     | 771.50460 | 770.49690 | 0.556 |
| C40H77O10P  | 6 | [M+Na] <sup>+</sup>    | 771.51600 | 748.52544 | 1.737 |
| C42H75O10P  | 6 | [M+H] <sup>+</sup>     | 771.51600 | 770.50979 | 1.373 |
| C41H81O8P   | 1 | [M+K] <sup>+</sup>     | 771.52920 | 732.56691 | 1.113 |
| C42H85O7P   | 1 | [M+K] <sup>+</sup>     | 771.56640 | 732.60329 | 0.057 |



|             |   |                        |           |           |       |
|-------------|---|------------------------|-----------|-----------|-------|
| C44H83O8P   | 2 | [M+H] <sup>+</sup>     | 771.58890 | 770.58256 | 1.204 |
| C44H87N2O6P | 1 | [M+H] <sup>+</sup>     | 771.63830 | 770.63018 | 1.107 |
| C42H72NO8P  | 3 | [M+Na] <sup>+</sup>    | 772.49030 | 749.49956 | 1.970 |
| C39H76NO9P  | 1 | [M+K] <sup>+</sup>     | 772.49030 | 733.52577 | 1.783 |
| C41H76NO10P | 1 | [M-H] <sup>-</sup>     | 772.51180 | 773.52069 | 2.094 |
| C40H80NO8P  | 1 | [M+K] <sup>+</sup>     | 772.52160 | 733.56216 | 4.800 |
| C43H76NO7P  | 1 | [M+Na] <sup>+</sup>    | 772.52160 | 749.53594 | 4.613 |
| C45H74NO7P  | 1 | [M+H] <sup>+</sup>     | 772.53090 | 771.52029 | 4.320 |
| C42H78NO9P  | 1 | [M+H] <sup>+</sup>     | 772.55120 | 771.54142 | 3.245 |
| C43H82NO8P  | 1 | [M+H] <sup>+</sup>     | 772.58760 | 771.57781 | 3.264 |
| C42H88NO6P  | 2 | [M+K] <sup>+</sup>     | 772.59520 | 733.63493 | 3.725 |
| C44H86NO7P  | 1 | [M+H] <sup>+</sup>     | 772.62050 | 771.61419 | 1.246 |
| C48H68O8    | 1 | [M+H] <sup>+</sup>     | 773.49590 | 772.49142 | 3.608 |
| C43H75O8P   | 1 | [M+Na] <sup>+</sup>    | 773.50750 | 750.51996 | 2.172 |
| C45H72O10   | 3 | [M+H] <sup>+</sup>     | 773.52340 | 772.51255 | 4.627 |
| C42H79O10P  | 1 | [M-H] <sup>-</sup>     | 773.53410 | 774.54109 | 0.363 |
| C42H77O10P  | 1 | [M+H] <sup>+</sup>     | 773.53470 | 772.52544 | 2.574 |
| C44H85O8P   | 1 | [M+H] <sup>+</sup>     | 773.60840 | 772.59821 | 3.776 |
| C38H74NO10P | 1 | [M+K] <sup>+</sup>     | 774.46770 | 735.50504 | 0.630 |
| C44H72NO8P  | 6 | [M+H] <sup>+</sup>     | 774.50330 | 773.49956 | 4.554 |
| C39H78NO9P  | 5 | [M+K] <sup>+</sup>     | 774.50330 | 735.54142 | 1.644 |
| C41H76NO10P | 1 | [M+H] <sup>+</sup>     | 774.52770 | 773.52069 | 0.333 |
| C43H78NO7P  | 1 | [M+Na] <sup>+</sup>    | 774.53800 | 751.55159 | 3.633 |
| C43H80NO7P  | 2 | [M-2H+Na] <sup>-</sup> | 774.53840 | 753.56724 | 3.756 |
| C43H80NO7P  | 2 | [M-2H+Na] <sup>-</sup> | 774.54420 | 753.56724 | 3.733 |
| C45H78NO7P  | 1 | [M-H] <sup>-</sup>     | 774.54420 | 775.55159 | 0.159 |
| C43H84NO8P  | 1 | [M+H] <sup>+</sup>     | 774.59960 | 773.59346 | 1.456 |
| C47H66O9    | 1 | [M+H] <sup>+</sup>     | 775.47790 | 774.47070 | 0.090 |
| C39H77O10P  | 1 | [M+K] <sup>+</sup>     | 775.48490 | 736.52544 | 4.757 |
| C42H73O9P   | 1 | [M+Na] <sup>+</sup>    | 775.48490 | 752.49922 | 4.571 |
| C41H72N2O9  | 1 | [M+K] <sup>+</sup>     | 775.48490 | 736.52378 | 2.623 |
| C43H77O7P   | 2 | [M+K] <sup>+</sup>     | 775.50430 | 736.54069 | 0.588 |
| C44H74NO8P  | 5 | [M+H] <sup>+</sup>     | 776.52020 | 775.51521 | 2.934 |
| C42H76NO8P  | 1 | [M+Na] <sup>+</sup>    | 776.52020 | 753.53086 | 0.156 |
| C42H82NO9P  | 1 | [M+H] <sup>+</sup>     | 776.57720 | 775.57272 | 3.597 |
| C44H83NO8   | 2 | [M+Na] <sup>+</sup>    | 776.60470 | 753.61187 | 4.647 |
| C40H75O12P  | 1 | [M-H] <sup>-</sup>     | 777.49300 | 778.49962 | 0.837 |
| C43H78O10   | 1 | [M+Na] <sup>+</sup>    | 777.55100 | 754.55950 | 2.930 |
| C45H76O10   | 1 | [M+H] <sup>+</sup>     | 777.55100 | 776.54385 | 0.156 |
| C42H81O10P  | 1 | [M+H] <sup>+</sup>     | 777.56140 | 776.55674 | 3.355 |
| C42H68NO10P | 1 | [M+H] <sup>+</sup>     | 778.46460 | 777.45809 | 0.972 |
| C43H82NO7P  | 1 | [M+Na] <sup>+</sup>    | 778.57520 | 755.58289 | 3.964 |
| C45H80NO7P  | 3 | [M+H] <sup>+</sup>     | 778.57790 | 777.56724 | 4.350 |
| C37H73O12P  | 1 | [M+K] <sup>+</sup>     | 779.44340 | 740.48397 | 4.771 |
| C39H71O13P  | 1 | [M+H] <sup>+</sup>     | 779.47010 | 778.46323 | 0.518 |
| C43H71O10P  | 4 | [M+H] <sup>+</sup>     | 779.48200 | 778.47849 | 4.822 |
| C40H77O12P  | 1 | [M-H] <sup>-</sup>     | 779.50850 | 780.51527 | 0.643 |
| C43H81O8P   | 1 | [M+Na] <sup>+</sup>    | 779.55990 | 756.56691 | 4.836 |
| C45H79O8P   | 1 | [M+H] <sup>+</sup>     | 779.55990 | 778.55126 | 1.759 |

|             |   |                        |           |           |       |
|-------------|---|------------------------|-----------|-----------|-------|
| C42H83O10P  | 1 | [M+H] <sup>+</sup>     | 779.58240 | 778.57239 | 3.516 |
| C40H72NO9P  | 1 | [M+K] <sup>+</sup>     | 780.46150 | 741.49447 | 4.968 |
| C42H70NO10P | 3 | [M+H] <sup>+</sup>     | 780.48430 | 779.47374 | 4.219 |
| C41H76NO9P  | 1 | [M+Na] <sup>+</sup>    | 780.51690 | 757.52577 | 2.442 |
| C43H74NO9P  | 1 | [M+H] <sup>+</sup>     | 780.51690 | 779.51012 | 0.632 |
| C42H80NO7P  | 1 | [M+K] <sup>+</sup>     | 780.52960 | 741.56724 | 1.016 |
| C45H76NO6P  | 1 | [M+Na] <sup>+</sup>    | 780.52960 | 757.54103 | 0.831 |
| C40H77NO11S | 1 | [M+H] <sup>+</sup>     | 780.52960 | 779.52174 | 0.758 |
| C44H78NO8P  | 1 | [M+H] <sup>+</sup>     | 780.55250 | 779.54651 | 1.637 |
| C45H82NO7P  | 1 | [M+H] <sup>+</sup>     | 780.59120 | 779.58289 | 1.328 |
| C41H64O14   | 2 | [M+H] <sup>+</sup>     | 781.43990 | 780.42961 | 3.863 |
| C42H79O8P   | 1 | [M+K] <sup>+</sup>     | 781.51200 | 742.55126 | 3.082 |
| C42H79O9P   | 1 | [M+Na] <sup>+</sup>    | 781.53370 | 758.54617 | 2.169 |
| C43H87N2O6P | 1 | [M+Na] <sup>+</sup>    | 781.61830 | 758.63018 | 1.403 |
| C43H70NO7P  | 1 | [M+K] <sup>+</sup>     | 782.44890 | 743.48899 | 4.143 |
| C40H76NO9P  | 2 | [M-2H+K] <sup>-</sup>  | 782.47450 | 745.52577 | 0.162 |
| C45H70NO8P  | 1 | [M-H] <sup>-</sup>     | 782.47450 | 783.48391 | 2.731 |
| C43H72NO8P  | 1 | [M-2H+Na] <sup>-</sup> | 782.47450 | 761.49956 | 1.121 |
| C41H77NO10  | 1 | [M+K] <sup>+</sup>     | 782.51410 | 743.55475 | 4.856 |
| C41H78NO9P  | 3 | [M+Na] <sup>+</sup>    | 782.53320 | 759.54142 | 3.266 |
| C45H78NO6P  | 1 | [M+Na] <sup>+</sup>    | 782.54330 | 759.55668 | 3.321 |
| C44H80NO8P  | 2 | [M+H] <sup>+</sup>     | 782.57120 | 781.56216 | 2.264 |
| C45H84NO7P  | 1 | [M+H] <sup>+</sup>     | 782.60840 | 781.59854 | 3.306 |
| C46H87NO8   | 1 | [M+H] <sup>+</sup>     | 782.65160 | 781.64317 | 1.482 |
| C43H68O11   | 1 | [M+Na] <sup>+</sup>    | 783.46810 | 760.47617 | 3.463 |
| C43H75O10P  | 2 | [M+H] <sup>+</sup>     | 783.51530 | 782.50979 | 2.245 |
| C41H77O10P  | 2 | [M+Na] <sup>+</sup>    | 783.51530 | 760.52544 | 0.817 |
| C40H79O12P  | 1 | [M+H] <sup>+</sup>     | 783.53720 | 782.53092 | 1.262 |
| C44H79O9P   | 1 | [M+H] <sup>+</sup>     | 783.55400 | 782.54617 | 0.710 |
| C45H82O10   | 1 | [M+H] <sup>+</sup>     | 783.59810 | 782.59080 | 0.037 |
| C43H89N2O6P | 1 | [M+Na] <sup>+</sup>    | 783.63830 | 760.64583 | 4.151 |
| C45H87N2O6P | 1 | [M+H] <sup>+</sup>     | 783.63830 | 782.63018 | 1.090 |
| C40H78NO10P | 1 | [M-2H+Na] <sup>-</sup> | 784.51400 | 763.53634 | 4.584 |
| C42H76NO10P | 1 | [M-H] <sup>-</sup>     | 784.51400 | 785.52069 | 0.742 |
| C43H78NO9P  | 1 | [M+H] <sup>+</sup>     | 784.55040 | 783.54142 | 2.176 |
| C44H82NO8P  | 1 | [M+H] <sup>+</sup>     | 784.58590 | 783.57781 | 1.048 |
| C43H88NO7P  | 1 | [M+Na] <sup>+</sup>    | 784.62250 | 761.62984 | 4.379 |
| C45H86NO7P  | 1 | [M+H] <sup>+</sup>     | 784.62250 | 783.61419 | 1.322 |
| C46H89NO8   | 1 | [M+H] <sup>+</sup>     | 784.66430 | 783.65882 | 2.281 |
| C41H79O9P   | 1 | [M+K] <sup>+</sup>     | 785.50830 | 746.54617 | 1.304 |
| C44H75O8P   | 1 | [M+Na] <sup>+</sup>    | 785.50830 | 762.51996 | 1.120 |
| C43H77O10P  | 2 | [M+H] <sup>+</sup>     | 785.53250 | 784.52544 | 0.266 |
| C41H79O10P  | 1 | [M+Na] <sup>+</sup>    | 785.53250 | 762.54109 | 2.788 |
| C56H80O2    | 1 | [M+H] <sup>+</sup>     | 785.62620 | 784.61583 | 3.945 |
| C39H74NO10P | 1 | [M+K] <sup>+</sup>     | 786.46450 | 747.50504 | 4.689 |
| C45H72NO8P  | 1 | [M+H] <sup>+</sup>     | 786.50370 | 785.49956 | 3.976 |
| C40H78NO9P  | 1 | [M+K] <sup>+</sup>     | 786.50370 | 747.54142 | 1.110 |
| C40H78NO10P | 1 | [M+Na] <sup>+</sup>    | 786.52810 | 763.53634 | 3.231 |
| C42H76NO10P | 1 | [M+H] <sup>+</sup>     | 786.52810 | 785.52069 | 0.181 |

|             |   |         |           |           |       |
|-------------|---|---------|-----------|-----------|-------|
| C42H78NO10P | 1 | [M-H]-  | 786.53040 | 787.53634 | 1.694 |
| C41H82NO8P  | 1 | [M+K]+  | 786.53840 | 747.57781 | 3.252 |
| C44H78NO7P  | 1 | [M+Na]+ | 786.53840 | 763.55159 | 3.069 |
| C44H84NO8P  | 1 | [M+H]+  | 786.60400 | 785.59346 | 4.160 |
| C45H88NO7P  | 1 | [M+H]+  | 786.63950 | 785.62984 | 3.034 |
| C45H87O8P   | 1 | [M+H]+  | 787.61770 | 786.61386 | 4.354 |
| C39H76NO10P | 2 | [M+K]+  | 788.48170 | 749.52069 | 2.712 |
| C42H72NO9P  | 2 | [M+Na]+ | 788.48170 | 765.49447 | 2.529 |
| C45H74NO8P  | 6 | [M+H]+  | 788.51910 | 787.51521 | 4.284 |
| C40H80NO9P  | 6 | [M+K]+  | 788.51910 | 749.55707 | 1.424 |
| C42H75N3O8  | 6 | [M+K]+  | 788.51910 | 749.55542 | 0.676 |
| C45H67O8P   | 2 | [M+Na]+ | 789.44780 | 766.45736 | 1.545 |
| C40H68O15   | 1 | [M+H]+  | 789.46260 | 788.45583 | 0.628 |
| C44H85O9P   | 2 | [M+H]+  | 789.60180 | 788.59312 | 1.781 |
| C45H89O8P   | 1 | [M+H]+  | 789.63750 | 788.62951 | 0.913 |
| C45H93N2O6P | 1 | [M+H]+  | 789.68730 | 788.67713 | 3.676 |
| C41H75O12S  | 1 | [M-H]-  | 790.48750 | 791.49790 | 3.960 |
| C42H74NO9P  | 1 | [M+Na]+ | 790.49850 | 767.51012 | 1.068 |
| C43H78NO7P  | 1 | [M+K]+  | 790.51160 | 751.55159 | 3.976 |
| C46H80NO7P  | 1 | [M+H]+  | 790.57280 | 789.56724 | 2.167 |
| C44H82NO7P  | 1 | [M+Na]+ | 790.57280 | 767.58289 | 0.868 |
| C46H82NO7P  | 1 | [M-H]-  | 790.57660 | 791.58289 | 1.236 |
| C45H85NO8   | 2 | [M+Na]+ | 790.61930 | 767.62752 | 3.237 |
| C38H73O12P  | 1 | [M+K]+  | 791.44350 | 752.48397 | 4.573 |
| C44H71O10P  | 6 | [M+H]+  | 791.48350 | 790.47849 | 2.854 |
| C43H77O8P   | 1 | [M+K]+  | 791.49690 | 752.53561 | 2.349 |
| C45H76O7P2  | 1 | [M+H]+  | 791.51360 | 790.50663 | 0.380 |
| C44H87O9P   | 1 | [M+H]+  | 791.61930 | 790.60877 | 4.113 |
| C44H74NO9P  | 2 | [M+H]+  | 792.52110 | 791.51012 | 4.677 |
| C42H82NO10P | 1 | [M+H]+  | 792.57720 | 791.56764 | 2.892 |
| C42H64O14   | 1 | [M+H]+  | 793.43960 | 792.42961 | 3.427 |
| C47H69O8P   | 1 | [M+H]+  | 793.47690 | 792.47301 | 4.258 |
| C42H75O9P   | 1 | [M+K]+  | 793.47690 | 754.51487 | 1.417 |
| C40H73O13P  | 2 | [M+H]+  | 793.48910 | 792.47888 | 3.713 |
| C45H70O10   | 1 | [M+Na]+ | 793.48910 | 770.49690 | 3.753 |
| C44H73O10P  | 6 | [M+H]+  | 793.49860 | 792.49414 | 3.540 |
| C44H83O8P   | 1 | [M+Na]+ | 793.56910 | 770.58256 | 3.377 |
| C45H87O7P   | 1 | [M+Na]+ | 793.61080 | 770.61894 | 3.320 |
| C43H72NO10P | 1 | [M+H]+  | 794.49300 | 793.48939 | 4.604 |
| C41H74NO10P | 1 | [M+Na]+ | 794.49300 | 771.50504 | 1.585 |
| C41H77O12S  | 1 | [M+H]+  | 794.52050 | 793.51360 | 0.466 |
| C46H78NO6P  | 1 | [M+Na]+ | 794.54550 | 771.55668 | 0.502 |
| C43H82NO8P  | 1 | [M+Na]+ | 794.57090 | 771.57781 | 4.872 |
| C45H80NO8P  | 3 | [M+H]+  | 794.57210 | 793.56216 | 3.363 |
| C36H68O17   | 1 | [M+Na]+ | 795.43780 | 772.44566 | 3.675 |
| C40H75O13P  | 1 | [M+H]+  | 795.50500 | 794.49453 | 4.018 |
| C42H77O10P  | 1 | [M+Na]+ | 795.51700 | 772.52544 | 2.941 |
| C44H75O10P  | 1 | [M+H]+  | 795.51700 | 794.50979 | 0.074 |
| C43H81O9P   | 2 | [M+Na]+ | 795.54950 | 772.56182 | 1.942 |

|             |   |            |           |           |       |
|-------------|---|------------|-----------|-----------|-------|
| C43H85N2O6P | 1 | [M+K]+     | 795.57480 | 756.61453 | 3.615 |
| C44H87O8P   | 1 | [M-2H+Na]- | 795.58670 | 774.61386 | 1.540 |
| C44H89N2O6P | 1 | [M+Na]+    | 795.63710 | 772.64583 | 2.580 |
| C41H78NO9P  | 2 | [M-2H+K]-  | 796.48920 | 759.54142 | 1.033 |
| C44H74NO8P  | 1 | [M-2H+Na]- | 796.48920 | 775.51521 | 0.093 |
| C41H78NO10P | 1 | [M-2H+Na]- | 796.51290 | 775.53634 | 3.134 |
| C43H76NO10P | 1 | [M-H]-     | 796.51290 | 797.52069 | 0.650 |
| C45H76NO7P  | 1 | [M+Na]+    | 796.52180 | 773.53594 | 4.223 |
| C40H77NO12S | 1 | [M+H]+     | 796.52180 | 795.51665 | 2.665 |
| C42H80NO9P  | 2 | [M+Na]+    | 796.54850 | 773.55707 | 2.769 |
| C44H78NO9P  | 2 | [M+H]+     | 796.54850 | 795.54142 | 0.242 |
| C43H86NO7P  | 1 | [M-2H+K]-  | 796.56410 | 759.61419 | 1.641 |
| C45H82NO8P  | 1 | [M+H]+     | 796.58810 | 795.57781 | 3.794 |
| C44H88NO7P  | 2 | [M+Na]+    | 796.61700 | 773.62984 | 2.591 |
| C49H91NO4   | 1 | [M+K]+     | 796.65950 | 757.69481 | 1.933 |
| C47H72O10   | 3 | [M+H]+     | 797.52340 | 796.51255 | 4.488 |
| C42H79O10P  | 6 | [M+Na]+    | 797.53320 | 774.54109 | 3.624 |
| C44H77O10P  | 6 | [M+H]+     | 797.53320 | 796.52544 | 0.616 |
| C43H70NO8P  | 1 | [M+K]+     | 798.44660 | 759.48391 | 0.572 |
| C40H74NO10P | 1 | [M+K]+     | 798.46560 | 759.50504 | 3.241 |
| C43H78NO10P | 2 | [M-H]-     | 798.52800 | 799.53634 | 1.337 |
| C41H80NO10P | 1 | [M-2H+Na]- | 798.52800 | 777.55199 | 2.437 |
| C41H78NO10P | 3 | [M+Na]+    | 798.52880 | 775.53634 | 4.059 |
| C43H76NO10P | 3 | [M+H]+     | 798.52880 | 797.52069 | 1.054 |
| C42H82NO8P  | 1 | [M+K]+     | 798.53790 | 759.57781 | 3.829 |
| C45H78NO7P  | 3 | [M+Na]+    | 798.53820 | 775.55159 | 3.273 |
| C46H88NO7P  | 1 | [M+H]+     | 798.63320 | 797.62984 | 4.900 |
| C44H90NO7P  | 1 | [M+Na]+    | 798.63320 | 775.64549 | 1.896 |
| C39H69O13P  | 1 | [M+Na]+    | 799.43490 | 776.44758 | 2.383 |
| C45H77O7P   | 1 | [M+K]+     | 799.49990 | 760.54069 | 4.933 |
| C47H74O10   | 1 | [M+H]+     | 799.53200 | 798.52820 | 4.341 |
| C45H76O10   | 1 | [M+Na]+    | 799.53200 | 776.54385 | 1.341 |
| C42H81O10P  | 1 | [M+Na]+    | 799.54920 | 776.55674 | 4.052 |
| C44H79O10P  | 1 | [M+H]+     | 799.54920 | 798.54109 | 1.052 |
| C43H85O8P   | 1 | [M+K]+     | 799.55830 | 760.59821 | 3.826 |
| C40H77NO11S | 1 | [M-2H+Na]- | 800.49910 | 779.52174 | 4.117 |
| C44H78NO7P  | 1 | [M-2H+K]-  | 800.49910 | 763.55159 | 1.365 |
| C44H84NO9P  | 1 | [M-H]-     | 800.58300 | 801.58837 | 2.370 |
| C41H69O13P  | 1 | [M+H]+     | 801.45560 | 800.44758 | 0.931 |
| C44H75O8P   | 1 | [M+K]+     | 801.48230 | 762.51996 | 1.009 |
| C40H75O12P  | 1 | [M+Na]+    | 801.48650 | 778.49962 | 2.920 |
| C45H79O7P   | 1 | [M+K]+     | 801.52120 | 762.55634 | 2.128 |
| C45H78O10   | 1 | [M+Na]+    | 801.55230 | 778.55950 | 4.464 |
| C46H89O8P   | 1 | [M+H]+     | 801.63910 | 800.62951 | 2.895 |
| C49H94O6    | 2 | [M+Na]+    | 801.69620 | 778.70504 | 2.416 |
| C51H92O6    | 2 | [M+H]+     | 801.69620 | 800.68939 | 0.576 |
| C36H61NO16  | 1 | [M+K]+     | 802.36450 | 763.39904 | 2.879 |
| C40H75O12S  | 1 | [M+Na]+    | 802.49010 | 779.49790 | 3.712 |
| C44H78NO7P  | 1 | [M+K]+     | 802.51140 | 763.55159 | 4.166 |

|             |   |                       |           |           |       |
|-------------|---|-----------------------|-----------|-----------|-------|
| C46H76NO8P  | 2 | [M+H] <sup>+</sup>    | 802.53570 | 801.53086 | 3.025 |
| C41H82NO9P  | 1 | [M+K] <sup>+</sup>    | 802.53570 | 763.57272 | 0.216 |
| C44H78NO8P  | 1 | [M+Na] <sup>+</sup>   | 802.53570 | 779.54651 | 0.036 |
| C45H82NO7P  | 1 | [M+Na] <sup>+</sup>   | 802.57610 | 779.58289 | 4.967 |
| C44H84NO9P  | 1 | [M+H] <sup>+</sup>    | 802.59880 | 801.58837 | 3.933 |
| C42H71O10P  | 1 | [M-2H+K] <sup>-</sup> | 803.42630 | 766.47849 | 0.982 |
| C39H73O12P  | 1 | [M+K] <sup>+</sup>    | 803.45040 | 764.48397 | 4.084 |
| C43H73O10P  | 1 | [M+Na] <sup>+</sup>   | 803.48560 | 780.49414 | 2.788 |
| C44H77O8P   | 1 | [M+K] <sup>+</sup>    | 803.50240 | 764.53561 | 4.531 |
| C40H77O12P  | 1 | [M+Na] <sup>+</sup>   | 803.50240 | 780.51527 | 2.601 |
| C45H81O8P   | 1 | [M+Na] <sup>+</sup>   | 803.55780 | 780.56691 | 2.078 |
| C42H85O9P   | 1 | [M+K] <sup>+</sup>    | 803.55780 | 764.59312 | 1.899 |
| C47H79O8P   | 1 | [M+H] <sup>+</sup>    | 803.55780 | 802.55126 | 0.907 |
| C52H76O5    | 1 | [M+Na] <sup>+</sup>   | 803.55780 | 780.56928 | 0.867 |
| C53H80O4    | 3 | [M+Na] <sup>+</sup>   | 803.59230 | 780.60566 | 3.213 |
| C46H91O8P   | 1 | [M+H] <sup>+</sup>    | 803.64970 | 802.64516 | 3.396 |
| C41H68NO10P | 1 | [M+K] <sup>+</sup>    | 804.42140 | 765.45809 | 0.203 |
| C39H75O12P  | 4 | [M+K] <sup>+</sup>    | 805.46660 | 766.49962 | 4.756 |
| C45H73O10P  | 1 | [M+H] <sup>+</sup>    | 805.50030 | 804.49414 | 1.377 |
| C42H79O12P  | 1 | [M-H] <sup>-</sup>    | 805.52430 | 806.53092 | 0.808 |
| C46H77O9P   | 1 | [M+H] <sup>+</sup>    | 805.53480 | 804.53052 | 3.717 |
| C45H83O8P   | 1 | [M+Na] <sup>+</sup>   | 805.57000 | 782.58256 | 2.210 |
| C41H72NO10P | 1 | [M-2H+K] <sup>-</sup> | 806.44080 | 769.48939 | 3.487 |
| C42H74NO9P  | 2 | [M+K] <sup>+</sup>    | 806.46940 | 767.51012 | 4.802 |
| C45H70NO8P  | 6 | [M+Na] <sup>+</sup>   | 806.47290 | 783.48391 | 0.283 |
| C42H74NO10P | 1 | [M+Na] <sup>+</sup>   | 806.49780 | 783.50504 | 4.391 |
| C44H72NO10P | 1 | [M+H] <sup>+</sup>    | 806.49780 | 805.48939 | 1.416 |
| C42H79NO13  | 1 | [M+H] <sup>+</sup>    | 806.55970 | 805.55515 | 3.366 |
| C46H80NO8P  | 2 | [M+H] <sup>+</sup>    | 806.57050 | 805.56216 | 1.329 |
| C44H82NO8P  | 1 | [M+Na] <sup>+</sup>   | 806.57050 | 783.57781 | 4.303 |
| C47H84NO7P  | 1 | [M+H] <sup>+</sup>    | 806.60470 | 805.59854 | 1.380 |
| C39H77O12P  | 1 | [M+K] <sup>+</sup>    | 807.47950 | 768.51527 | 1.339 |
| C44H81O9P   | 1 | [M+Na] <sup>+</sup>   | 807.54740 | 784.56182 | 4.514 |
| C47H83O8P   | 1 | [M+H] <sup>+</sup>    | 807.59220 | 806.58256 | 2.936 |
| C46H95O8P   | 1 | [M+H] <sup>+</sup>    | 807.68310 | 806.67646 | 0.779 |
| C41H72NO10P | 1 | [M+K] <sup>+</sup>    | 808.44890 | 769.48939 | 4.500 |
| C46H76NO7P  | 1 | [M+Na] <sup>+</sup>   | 808.52160 | 785.53594 | 4.408 |
| C46H82NO8P  | 1 | [M+H] <sup>+</sup>    | 808.58400 | 807.57781 | 1.333 |
| C45H87NO8   | 1 | [M+K] <sup>+</sup>    | 808.60620 | 769.64317 | 0.148 |
| C48H83NO7   | 1 | [M+Na] <sup>+</sup>   | 808.60620 | 785.61696 | 0.030 |
| C45H87NO9   | 1 | [M+Na] <sup>+</sup>   | 808.62610 | 785.63809 | 1.491 |
| C39H62O15   | 1 | [M+K] <sup>+</sup>    | 809.37500 | 770.40888 | 3.674 |
| C43H79O10P  | 1 | [M+Na] <sup>+</sup>   | 809.52830 | 786.54109 | 2.483 |
| C47H85O8P   | 1 | [M+H] <sup>+</sup>    | 809.60320 | 808.59821 | 2.815 |
| C45H91N2O6P | 1 | [M+Na] <sup>+</sup>   | 809.64900 | 786.66148 | 2.096 |
| C47H88NO7P  | 1 | [M+H] <sup>+</sup>    | 810.63910 | 809.62984 | 2.451 |
| C48H92NO6P  | 1 | [M+H] <sup>+</sup>    | 810.67490 | 809.66623 | 1.729 |
| C48H91NO8   | 1 | [M+H] <sup>+</sup>    | 810.68510 | 809.67447 | 4.145 |
| C40H69O13P  | 1 | [M+Na] <sup>+</sup>   | 811.43550 | 788.44758 | 1.608 |

|               |   |         |           |           |       |
|---------------|---|---------|-----------|-----------|-------|
| C40H68O15     | 1 | [M+Na]+ | 811.44500 | 788.45583 | 0.058 |
| C48H68O8      | 1 | [M+K]+  | 811.45780 | 772.49142 | 3.979 |
| C43H81O9P     | 1 | [M+K]+  | 811.52130 | 772.56182 | 4.527 |
| C46H77O8P     | 1 | [M+Na]+ | 811.52130 | 788.53561 | 4.350 |
| C43H81O10P    | 2 | [M+Na]+ | 811.54210 | 788.55674 | 4.756 |
| C44H85O8P     | 1 | [M+K]+  | 811.55930 | 772.59821 | 2.537 |
| C42H80NO10P   | 1 | [M+Na]+ | 812.54400 | 789.55199 | 3.435 |
| C44H78NO10P   | 1 | [M+H]+  | 812.54400 | 811.53634 | 0.482 |
| C46H79NO8     | 1 | [M+K]+  | 812.54400 | 773.58057 | 0.345 |
| C44H88NO8P    | 1 | [M+Na]+ | 812.61700 | 789.62476 | 3.718 |
| C46H86NO8P    | 1 | [M+H]+  | 812.61700 | 811.60911 | 0.765 |
| C45H92NO7P    | 2 | [M+Na]+ | 812.65340 | 789.66114 | 3.736 |
| C47H90NO7P    | 3 | [M+H]+  | 812.65460 | 811.64549 | 2.260 |
| C48H93NO8     | 1 | [M+H]+  | 812.69970 | 811.69012 | 2.842 |
| C46H79O8P     | 1 | [M+Na]+ | 813.54240 | 790.55126 | 2.360 |
| C43H83O9P     | 1 | [M+K]+  | 813.54240 | 774.57747 | 2.183 |
| C52H92O6      | 1 | [M+H]+  | 813.69430 | 812.68939 | 2.903 |
| C29H51N3O18P2 | 1 | [M+Na]+ | 814.25730 | 791.26429 | 4.651 |
| C43H70NO10P   | 1 | [M+Na]+ | 814.45930 | 791.47374 | 4.491 |
| C47H76NO8P    | 1 | [M+H]+  | 814.54080 | 813.53086 | 3.280 |
| C48H80NO7P    | 1 | [M+H]+  | 814.57090 | 813.56724 | 4.435 |
| C43H86NO8P    | 1 | [M+K]+  | 814.57090 | 775.60911 | 1.667 |
| C46H82NO7P    | 1 | [M+Na]+ | 814.57090 | 791.58289 | 1.490 |
| C43H86NO9P    | 1 | [M+Na]+ | 814.59700 | 791.60402 | 4.611 |
| C46H88NO8P    | 1 | [M+H]+  | 814.62800 | 813.62476 | 4.945 |
| C44H73O9P     | 1 | [M+K]+  | 815.46200 | 776.49922 | 0.459 |
| C47H69O8P     | 1 | [M+Na]+ | 815.46200 | 792.47301 | 0.282 |
| C45H77O8P     | 1 | [M+K]+  | 815.49560 | 776.53561 | 3.874 |
| C42H81O10P    | 1 | [M+K]+  | 815.51630 | 776.55674 | 4.401 |
| C51H90O7      | 2 | [M+H]+  | 815.67400 | 814.66866 | 2.362 |
| C52H94O6      | 2 | [M+H]+  | 815.71120 | 814.70504 | 1.363 |
| C43H72NO10P   | 1 | [M+Na]+ | 816.48050 | 793.48939 | 2.316 |
| C44H76NO8P    | 1 | [M+K]+  | 816.49610 | 777.53086 | 2.562 |
| C44H76NO9P    | 2 | [M+Na]+ | 816.51760 | 793.52577 | 3.192 |
| C41H80NO10P   | 2 | [M+K]+  | 816.51760 | 777.55199 | 3.015 |
| C41H79O12P    | 1 | [M+Na]+ | 817.52250 | 794.53092 | 2.887 |
| C43H77O12P    | 1 | [M+H]+  | 817.52250 | 816.51527 | 0.048 |
| C43H87O9P     | 1 | [M+K]+  | 817.57060 | 778.60877 | 1.619 |
| C46H83O8P     | 1 | [M+Na]+ | 817.57060 | 794.58256 | 1.443 |
| C47H97N2O6P   | 1 | [M+H]+  | 817.71250 | 816.70843 | 3.910 |
| C52H96O6      | 1 | [M+H]+  | 817.72840 | 816.72069 | 0.536 |
| C43H74NO10P   | 2 | [M+Na]+ | 818.49660 | 795.50504 | 2.860 |
| C45H72NO10P   | 3 | [M+H]+  | 818.49930 | 817.48939 | 3.228 |
| C44H84NO10P   | 2 | [M+H]+  | 818.58750 | 817.58329 | 3.736 |
| C41H64O15     | 1 | [M+Na]+ | 819.41400 | 796.42453 | 0.309 |
| C39H74O11P2   | 1 | [M+K]+  | 819.43110 | 780.47064 | 3.284 |
| C39H73O13P    | 1 | [M+K]+  | 819.44000 | 780.47888 | 2.482 |
| C44H77O10P    | 1 | [M+Na]+ | 819.51270 | 796.52544 | 2.392 |
| C46H75O10P    | 5 | [M+H]+  | 819.51460 | 818.50979 | 3.001 |

|             |   |            |           |           |       |
|-------------|---|------------|-----------|-----------|-------|
| C41H81O12P  | 1 | [M+Na]+    | 819.53890 | 796.54657 | 3.795 |
| C43H79O12P  | 1 | [M+H]+     | 819.53890 | 818.53092 | 0.868 |
| C44H82O13   | 1 | [M+H]+     | 819.57900 | 818.57555 | 4.657 |
| C45H74NO10P | 4 | [M+H]+     | 820.51100 | 819.50504 | 1.594 |
| C45H84NO8P  | 1 | [M+Na]+    | 820.58540 | 797.59346 | 3.316 |
| C47H82NO8P  | 1 | [M+H]+     | 820.58540 | 819.57781 | 0.392 |
| C48H86NO7P  | 1 | [M+H]+     | 820.61870 | 819.61419 | 3.367 |
| C39H75O13P  | 3 | [M+K]+     | 821.45980 | 782.49453 | 2.576 |
| C42H77O13P  | 2 | [M+H]+     | 821.51570 | 820.51018 | 2.135 |
| C47H74O10   | 1 | [M+Na]+    | 821.51950 | 798.52820 | 2.529 |
| C46H77O10P  | 2 | [M+H]+     | 821.53240 | 820.52544 | 0.376 |
| C44H79O10P  | 1 | [M+Na]+    | 821.53240 | 798.54109 | 2.544 |
| C46H87O8P   | 1 | [M+Na]+    | 821.60050 | 798.61386 | 3.140 |
| C42H74NO10P | 1 | [M+K]+     | 822.46420 | 783.50504 | 4.849 |
| C45H76NO10P | 1 | [M+H]+     | 822.52430 | 821.52069 | 4.447 |
| C43H78NO10P | 1 | [M+Na]+    | 822.52430 | 799.53634 | 1.531 |
| C44H82NO9P  | 1 | [M+Na]+    | 822.56330 | 799.57272 | 1.649 |
| C46H80NO9P  | 1 | [M+H]+     | 822.56330 | 821.55707 | 1.268 |
| C45H86NO8P  | 2 | [M+Na]+    | 822.60110 | 799.60911 | 3.369 |
| C47H84NO8P  | 3 | [M+H]+     | 822.60320 | 821.59346 | 3.005 |
| C40H64O16   | 1 | [M+Na]+    | 823.41130 | 800.41944 | 3.204 |
| C42H62O16   | 1 | [M+H]+     | 823.41130 | 822.40379 | 0.290 |
| C43H77O10P  | 1 | [M+K]+     | 823.48760 | 784.52544 | 1.201 |
| C43H83O12P  | 1 | [M+H]+     | 823.56720 | 822.56222 | 2.779 |
| C56H80O2    | 1 | [M+K]+     | 823.57900 | 784.61583 | 0.023 |
| C45H89N2O6P | 1 | [M+K]+     | 823.60520 | 784.64583 | 4.585 |
| C44H68NO10P | 1 | [M+Na]+    | 824.44920 | 801.45809 | 2.295 |
| C48H76NO8P  | 2 | [M-H]-     | 824.52020 | 825.53086 | 4.109 |
| C43H82NO9P  | 2 | [M-2H+K]-  | 824.52020 | 787.57272 | 1.362 |
| C46H78NO8P  | 2 | [M-2H+Na]- | 824.52020 | 803.54651 | 0.454 |
| C48H76NO8P  | 2 | [M-H]-     | 824.52160 | 825.53086 | 2.411 |
| C46H78NO8P  | 2 | [M-2H+Na]- | 824.52160 | 803.54651 | 1.244 |
| C43H82NO9P  | 2 | [M-2H+K]-  | 824.52160 | 787.57272 | 0.336 |
| C48H83NO7   | 1 | [M+K]+     | 824.57880 | 785.61696 | 1.583 |
| C44H84NO9P  | 1 | [M+Na]+    | 824.57880 | 801.58837 | 1.463 |
| C46H82NO9P  | 1 | [M+H]+     | 824.57880 | 823.57272 | 1.447 |
| C46H91NO8   | 1 | [M+K]+     | 824.63560 | 785.67447 | 2.450 |
| C44H83O10P  | 1 | [M+Na]+    | 825.55760 | 802.57239 | 4.857 |
| C43H85O12P  | 1 | [M+H]+     | 825.58570 | 824.57787 | 0.680 |
| C46H78NO8P  | 2 | [M+Na]+    | 826.53920 | 803.54651 | 4.199 |
| C43H82NO9P  | 2 | [M+K]+     | 826.53920 | 787.57272 | 4.025 |
| C48H76NO8P  | 1 | [M+H]+     | 826.53920 | 825.53086 | 1.297 |
| C45H80NO10P | 2 | [M+H]+     | 826.55800 | 825.55199 | 1.522 |
| C43H82NO10P | 2 | [M+Na]+    | 826.55800 | 803.56764 | 1.380 |
| C53H94O6    | 1 | [M+H]+     | 827.70870 | 826.70504 | 4.364 |
| C51H96O6    | 1 | [M+Na]+    | 827.70870 | 804.72069 | 1.465 |
| C46H80NO7P  | 1 | [M+K]+     | 828.52940 | 789.56724 | 1.199 |
| C43H84NO10P | 1 | [M+Na]+    | 828.56920 | 805.58329 | 3.994 |
| C47H90NO8P  | 1 | [M+H]+     | 828.64960 | 827.64041 | 2.319 |

|             |   |            |           |           |       |
|-------------|---|------------|-----------|-----------|-------|
| C41H75O13P  | 1 | [M+Na]+    | 829.48780 | 806.49453 | 4.877 |
| C43H73O13P  | 1 | [M+H]+     | 829.48780 | 828.47888 | 1.984 |
| C46H79O9P   | 1 | [M+Na]+    | 829.53900 | 806.54617 | 4.346 |
| C43H83O10P  | 1 | [M+K]+     | 829.53900 | 790.57239 | 4.172 |
| C51H98O6    | 2 | [M+Na]+    | 829.72860 | 806.73634 | 3.660 |
| C53H96O6    | 2 | [M+H]+     | 829.72860 | 828.72069 | 0.769 |
| C44H74NO10P | 1 | [M+Na]+    | 830.49780 | 807.50504 | 4.264 |
| C46H72NO10P | 1 | [M+H]+     | 830.49780 | 829.48939 | 1.375 |
| C45H78NO8P  | 1 | [M+K]+     | 830.51020 | 791.54651 | 0.653 |
| C41H77O12P  | 2 | [M+K]+     | 831.47990 | 792.51527 | 1.781 |
| C47H72NO8P  | 1 | [M+Na]+    | 832.48710 | 809.49956 | 2.016 |
| C44H76NO10P | 1 | [M+Na]+    | 832.51400 | 809.52069 | 4.914 |
| C46H74NO10P | 1 | [M+H]+     | 832.51400 | 831.50504 | 2.032 |
| C46H84NO7P  | 1 | [M+K]+     | 832.55760 | 793.59854 | 4.916 |
| C41H79O12P  | 2 | [M+K]+     | 833.49740 | 794.53092 | 3.996 |
| C46H83O9P   | 1 | [M+Na]+    | 833.56270 | 810.57747 | 4.793 |
| C47H91N2O6P | 1 | [M+Na]+    | 833.65140 | 810.66148 | 0.843 |
| C47H93O9P   | 1 | [M+H]+     | 833.66440 | 832.65572 | 1.687 |
| C40H77NO12S | 1 | [M+K]+     | 834.47870 | 795.51665 | 1.322 |
| C44H78NO9P  | 1 | [M+K]+     | 834.50270 | 795.54142 | 2.244 |
| C47H74NO8P  | 1 | [M+Na]+    | 834.50270 | 811.51521 | 2.072 |
| C50H85NO7   | 1 | [M+Na]+    | 834.62580 | 811.63261 | 4.761 |
| C45H88NO10P | 1 | [M+H]+     | 834.62580 | 833.61459 | 4.723 |
| C47H89NO8   | 1 | [M+K]+     | 834.62580 | 795.65882 | 4.589 |
| C40H77O13P  | 1 | [M+K]+     | 835.47240 | 796.51018 | 1.118 |
| C44H83O12P  | 1 | [M+H]+     | 835.56680 | 834.56222 | 3.218 |
| C47H89O8P   | 1 | [M+Na]+    | 835.61830 | 812.62951 | 0.515 |
| C46H91O10P  | 2 | [M+H]+     | 835.64240 | 834.63499 | 0.169 |
| C47H95O9P   | 1 | [M+H]+     | 835.67580 | 834.67137 | 3.403 |
| C43H78NO10P | 2 | [M-2H+K]-  | 836.48090 | 799.53634 | 4.827 |
| C47H92NO7P  | 1 | [M+Na]+    | 836.65030 | 813.66114 | 0.076 |
| C48H96NO6P  | 1 | [M+Na]+    | 836.68290 | 813.69753 | 4.600 |
| C42H71O13P  | 2 | [M+Na]+    | 837.44930 | 814.46323 | 3.767 |
| C46H71O10P  | 1 | [M+Na]+    | 837.46570 | 814.47849 | 2.400 |
| C47H74O10   | 1 | [M+K]+     | 837.49520 | 798.52820 | 4.596 |
| C46H87O9P   | 1 | [M+Na]+    | 837.59620 | 814.60877 | 2.143 |
| C45H86NO9P  | 2 | [M+Na]+    | 838.59710 | 815.60402 | 4.598 |
| C47H94NO7P  | 1 | [M+Na]+    | 838.66640 | 815.67679 | 0.460 |
| C50H95NO8   | 1 | [M+H]+     | 838.71460 | 837.70577 | 1.860 |
| C41H69O13P  | 1 | [M+K]+     | 839.41120 | 800.44758 | 0.555 |
| C46H73O10P  | 1 | [M+Na]+    | 839.48590 | 816.49414 | 3.026 |
| C47H76O11   | 1 | [M+Na]+    | 839.52440 | 816.53877 | 4.273 |
| C45H85O10P  | 1 | [M+Na]+    | 839.57310 | 816.58804 | 4.955 |
| C44H87O12P  | 1 | [M+H]+     | 839.59930 | 838.59352 | 1.773 |
| C47H93O8P   | 1 | [M+Na]+    | 839.64870 | 816.66081 | 1.584 |
| C45H75O12S  | 1 | [M+H]+     | 840.50230 | 839.49790 | 3.415 |
| C43H82NO10P | 1 | [M-2H+K]-  | 840.51310 | 803.56764 | 3.733 |
| C46H78NO9P  | 1 | [M-2H+Na]- | 840.51310 | 819.54142 | 2.842 |
| C49H78NO8P  | 1 | [M+H]+     | 840.55790 | 839.54651 | 4.904 |



|                |   |                        |           |           |       |
|----------------|---|------------------------|-----------|-----------|-------|
| C46H82NO10P    | 2 | [M+H] <sup>+</sup>     | 840.57520 | 839.56764 | 0.347 |
| C44H84NO10P    | 1 | [M+Na] <sup>+</sup>    | 840.57650 | 817.58329 | 4.748 |
| C42H75O13P     | 1 | [M+Na] <sup>+</sup>    | 841.48650 | 818.49453 | 3.262 |
| C44H73O13P     | 1 | [M+H] <sup>+</sup>     | 841.48650 | 840.47888 | 0.411 |
| C52H98O6       | 1 | [M+Na] <sup>+</sup>    | 841.72880 | 818.73634 | 3.846 |
| C54H96O6       | 1 | [M+H] <sup>+</sup>     | 841.72880 | 840.72069 | 0.996 |
| C43H84NO10P    | 2 | [M-2H+K] <sup>-</sup>  | 842.52850 | 805.58329 | 4.021 |
| C46H80NO9P     | 2 | [M-2H+Na] <sup>-</sup> | 842.52850 | 821.55707 | 3.132 |
| C43H84NO10P    | 2 | [M-2H+K] <sup>-</sup>  | 842.53080 | 805.58329 | 1.291 |
| C46H80NO9P     | 2 | [M-2H+Na] <sup>-</sup> | 842.53080 | 821.55707 | 0.402 |
| C44H86NO9P     | 1 | [M+K] <sup>+</sup>     | 842.57070 | 803.60402 | 4.186 |
| C45H90NO9P     | 1 | [M+Na] <sup>+</sup>    | 842.62850 | 819.63532 | 4.695 |
| C48H92NO8P     | 1 | [M+H] <sup>+</sup>     | 842.65950 | 841.65606 | 4.543 |
| C41H73O13P     | 1 | [M+K] <sup>+</sup>     | 843.44340 | 804.47888 | 1.620 |
| C48H75O10P     | 1 | [M+H] <sup>+</sup>     | 843.52090 | 842.50979 | 4.554 |
| C47H83O8P      | 1 | [M-2H+K] <sup>-</sup>  | 843.53140 | 806.58256 | 0.286 |
| C44H85O10P     | 1 | [M+K] <sup>+</sup>     | 843.55350 | 804.58804 | 2.740 |
| C45H89O9P      | 1 | [M+K] <sup>+</sup>     | 843.59110 | 804.62442 | 4.180 |
| C54H98O6       | 1 | [M+H] <sup>+</sup>     | 843.74190 | 842.73634 | 2.029 |
| C52H100O6      | 1 | [M+Na] <sup>+</sup>    | 843.74190 | 820.75199 | 0.814 |
| C46H80NO8P     | 1 | [M+K] <sup>+</sup>     | 844.52420 | 805.56216 | 1.312 |
| C44H88NO9P     | 1 | [M+K] <sup>+</sup>     | 844.58460 | 805.61967 | 2.104 |
| C49H82NO8P     | 1 | [M+H] <sup>+</sup>     | 844.58460 | 843.57781 | 0.566 |
| C42H79O12P     | 1 | [M+K] <sup>+</sup>     | 845.49560 | 806.53092 | 1.811 |
| C46H79O10P     | 2 | [M+Na] <sup>+</sup>    | 845.52810 | 822.54109 | 2.614 |
| C48H77O10P     | 1 | [M+H] <sup>+</sup>     | 845.52850 | 844.52544 | 4.978 |
| C47H83O8P      | 1 | [M+K] <sup>+</sup>     | 845.54590 | 806.58256 | 0.226 |
| C23H38N7O17P3S | 1 | [M-2H+K] <sup>-</sup>  | 846.07480 | 809.12578 | 0.494 |
| C45H78NO9P     | 1 | [M+K] <sup>+</sup>     | 846.50540 | 807.54142 | 0.977 |
| C45H78NO10P    | 2 | [M+Na] <sup>+</sup>    | 846.52820 | 823.53634 | 3.120 |
| C46H82NO9P     | 1 | [M+Na] <sup>+</sup>    | 846.56610 | 823.57272 | 4.909 |
| C49H84NO8P     | 1 | [M+H] <sup>+</sup>     | 846.59940 | 845.59346 | 1.569 |
| C47H86NO8P     | 1 | [M+Na] <sup>+</sup>    | 846.59940 | 823.60911 | 1.265 |
| C46H88NO10P    | 1 | [M+H] <sup>+</sup>     | 846.61800 | 845.61459 | 4.557 |
| C49H100NO7P    | 1 | [M+H] <sup>+</sup>     | 846.73090 | 845.72374 | 0.133 |
| C46H81O9P      | 1 | [M+K] <sup>+</sup>     | 847.52870 | 808.56182 | 4.396 |
| C42H81O13P     | 1 | [M+Na] <sup>+</sup>    | 847.52870 | 824.54148 | 2.366 |
| C45H83O12P     | 4 | [M+H] <sup>+</sup>     | 847.57160 | 846.56222 | 2.491 |
| C44H76NO10P    | 1 | [M+K] <sup>+</sup>     | 848.48350 | 809.52069 | 0.398 |
| C48H76NO8P     | 1 | [M+Na] <sup>+</sup>    | 848.52040 | 825.53086 | 0.378 |
| C41H79O13P     | 1 | [M+K] <sup>+</sup>     | 849.49240 | 810.52583 | 4.021 |
| C45H85O12P     | 1 | [M+H] <sup>+</sup>     | 849.58490 | 848.57787 | 0.281 |
| C47H91N2O6P    | 1 | [M+K] <sup>+</sup>     | 849.62320 | 810.66148 | 1.678 |
| C47H74NO8P     | 1 | [M+K] <sup>+</sup>     | 850.47650 | 811.51521 | 2.185 |
| C44H80NO10P    | 1 | [M-2H+K] <sup>-</sup>  | 850.50450 | 813.55199 | 4.600 |
| C46H86NO9P     | 1 | [M+Na] <sup>+</sup>    | 850.58970 | 827.60402 | 4.167 |
| C49H88NO8P     | 1 | [M+H] <sup>+</sup>     | 850.62880 | 849.62476 | 3.795 |
| C47H90NO8P     | 1 | [M+Na] <sup>+</sup>    | 850.62880 | 827.64041 | 0.975 |
| C48H95NO8      | 1 | [M-2H+K] <sup>-</sup>  | 850.65600 | 813.70577 | 1.916 |

|               |   |            |           |           |       |
|---------------|---|------------|-----------|-----------|-------|
| C40H78O13P2   | 2 | [M+Na]+    | 851.48320 | 828.49177 | 2.593 |
| C48H97N2O6P   | 1 | [M+Na]+    | 851.69660 | 828.70843 | 1.230 |
| C48H82NO8P    | 1 | [M-2H+Na]- | 852.55410 | 831.57781 | 2.611 |
| C45H86NO9P    | 1 | [M-2H+K]-  | 852.55410 | 815.60402 | 1.732 |
| C50H80NO8P    | 1 | [M-H]-     | 852.55410 | 853.56216 | 0.924 |
| C48H86NO9P    | 1 | [M+H]+     | 852.61380 | 851.60402 | 2.940 |
| C49H90NO8P    | 1 | [M+H]+     | 852.64610 | 851.64041 | 1.851 |
| C47H92NO8P    | 1 | [M+Na]+    | 852.64610 | 829.65606 | 0.963 |
| C50H94NO7P    | 1 | [M+H]+     | 852.68770 | 851.67679 | 4.265 |
| C46H71O10P    | 1 | [M+K]+     | 853.44500 | 814.47849 | 3.938 |
| C45H73O13P    | 1 | [M+H]+     | 853.48380 | 852.47888 | 2.758 |
| C43H75O13P    | 1 | [M+Na]+    | 853.48380 | 830.49453 | 0.053 |
| C45H83O10P    | 1 | [M+K]+     | 853.53480 | 814.57239 | 0.866 |
| C48H85O10P    | 1 | [M+H]+     | 853.59760 | 852.58804 | 2.684 |
| C47H91O8P     | 1 | [M+K]+     | 853.60910 | 814.64516 | 0.927 |
| C45H89O12P    | 1 | [M+H]+     | 853.61800 | 852.60917 | 1.829 |
| C47H95N2O6P   | 1 | [M+K]+     | 853.65340 | 814.69278 | 2.960 |
| C44H84NO10P   | 1 | [M-2H+K]-  | 854.52770 | 817.58329 | 4.901 |
| C45H86NO10P   | 1 | [M+Na]+    | 854.58950 | 831.59894 | 1.569 |
| C47H84NO10P   | 1 | [M+H]+     | 854.58950 | 853.58329 | 1.238 |
| C42H73O13P    | 1 | [M+K]+     | 855.44190 | 816.47888 | 0.157 |
| C45H75O13P    | 1 | [M+H]+     | 855.50440 | 854.49453 | 3.034 |
| C31H53N3O19P2 | 1 | [M+Na]+    | 856.26570 | 833.27486 | 1.894 |
| C46H76NO10P   | 1 | [M+Na]+    | 856.50610 | 833.52069 | 4.447 |
| C47H80NO8P    | 1 | [M+K]+     | 856.52220 | 817.56216 | 3.629 |
| C44H86NO10P   | 2 | [M-2H+K]-  | 856.54500 | 819.59894 | 2.963 |
| C44H86NO10P   | 2 | [M-2H+K]-  | 856.55140 | 819.59894 | 4.509 |
| C48H84NO7P    | 1 | [M+K]+     | 856.56170 | 817.59854 | 0.008 |
| C44H83NO13    | 1 | [M+Na]+    | 856.57260 | 833.58645 | 3.579 |
| C50H82NO8P    | 2 | [M+H]+     | 856.58800 | 855.57781 | 3.411 |
| C47H86NO10P   | 1 | [M+H]+     | 856.60710 | 855.59894 | 1.041 |
| C47H96NO7P    | 1 | [M+K]+     | 856.65150 | 817.69244 | 4.778 |
| C49H94NO8P    | 1 | [M+H]+     | 856.67900 | 855.67171 | 0.026 |
| C43H79O13P    | 1 | [M+Na]+    | 857.51880 | 834.52583 | 4.367 |
| C45H77O13P    | 1 | [M+H]+     | 857.51880 | 856.51018 | 1.570 |
| C44H85O12P    | 2 | [M-2H+Na]- | 857.55150 | 836.57787 | 0.507 |
| C46H91O9P     | 1 | [M+K]+     | 857.60730 | 818.64007 | 4.753 |
| C48H89O10P    | 1 | [M+H]+     | 857.62550 | 856.61934 | 1.293 |
| C53H102O6     | 1 | [M+Na]+    | 857.76020 | 834.76764 | 3.890 |
| C55H100O6     | 1 | [M+H]+     | 857.76020 | 856.75199 | 1.094 |
| C48H76NO10P   | 1 | [M+H]+     | 858.52670 | 857.52069 | 1.465 |
| C46H78NO10P   | 1 | [M+Na]+    | 858.52670 | 835.53634 | 1.329 |
| C42H77O13P    | 1 | [M+K]+     | 859.47610 | 820.51018 | 3.218 |
| C47H81O10P    | 2 | [M+Na]+    | 859.54310 | 836.55674 | 3.327 |
| C46H80NO10P   | 2 | [M+Na]+    | 860.54490 | 837.55199 | 4.289 |
| C48H78NO10P   | 2 | [M+H]+     | 860.54490 | 859.53634 | 1.501 |
| C50H86NO8P    | 1 | [M+H]+     | 860.61500 | 859.60911 | 1.601 |
| C48H88NO8P    | 1 | [M+Na]+    | 860.61500 | 837.62476 | 1.186 |
| C45H81O13P    | 1 | [M+H]+     | 861.55100 | 860.54148 | 2.607 |

|                |   |            |           |           |       |
|----------------|---|------------|-----------|-----------|-------|
| C54H94O6       | 1 | [M+Na]+    | 861.69830 | 838.70504 | 4.685 |
| C56H92O6       | 1 | [M+H]+     | 861.69830 | 860.68939 | 1.901 |
| C27H44N7O17P3S | 1 | [M-H]-     | 862.16660 | 863.17273 | 1.320 |
| C45H75O12S     | 2 | [M+Na]+    | 862.48700 | 839.49790 | 0.140 |
| C48H80NO10P    | 1 | [M+H]+     | 862.56250 | 861.55199 | 3.759 |
| C48H96NO9P     | 1 | [M+H]+     | 862.69090 | 861.68227 | 1.573 |
| C43H71O13P     | 1 | [M-2H+K]-  | 863.41520 | 826.46323 | 3.898 |
| C44H75O13P     | 1 | [M-2H+Na]- | 863.46550 | 842.49453 | 3.590 |
| C48H89O9P      | 1 | [M+Na]+    | 863.61150 | 840.62442 | 2.484 |
| C55H106O6      | 1 | [M+H]+     | 863.80210 | 862.79894 | 4.760 |
| C45H82NO10P    | 2 | [M-2H+K]-  | 864.51240 | 827.56764 | 4.439 |
| C45H82NO10P    | 2 | [M-2H+K]-  | 864.51390 | 827.56764 | 2.704 |
| C48H82NO10P    | 2 | [M+H]+     | 864.57070 | 863.56764 | 4.867 |
| C46H84NO10P    | 1 | [M+Na]+    | 864.57070 | 841.58329 | 2.092 |
| C48H75O10P     | 1 | [M+Na]+    | 865.50270 | 842.50979 | 4.263 |
| C45H79O12P     | 1 | [M+Na]+    | 865.51620 | 842.53092 | 4.552 |
| C45H81O12P     | 2 | [M-2H+Na]- | 865.51710 | 844.54657 | 4.084 |
| C46H85O10P     | 1 | [M-2H+K]-  | 865.53570 | 828.58804 | 1.085 |
| C47H87O10P     | 1 | [M+Na]+    | 865.59720 | 842.60369 | 4.956 |
| C49H85O10P     | 1 | [M+H]+     | 865.59720 | 864.58804 | 2.185 |
| C48H91O9P      | 3 | [M+Na]+    | 865.62720 | 842.64007 | 2.420 |
| C48H78NO8P     | 1 | [M+K]+     | 866.50690 | 827.54651 | 3.183 |
| C49H98NO7P     | 1 | [M+Na]+    | 866.69520 | 843.70809 | 2.439 |
| C48H77O10P     | 1 | [M+Na]+    | 867.51800 | 844.52544 | 3.850 |
| C46H85O10P     | 1 | [M+K]+     | 867.55400 | 828.58804 | 3.240 |
| C46H91O12P     | 1 | [M+H]+     | 867.62940 | 866.62482 | 3.099 |
| C48H93O9P      | 1 | [M+Na]+    | 867.64720 | 844.65572 | 2.599 |
| C56H98O6       | 1 | [M+H]+     | 867.74230 | 866.73634 | 1.512 |
| C54H100O6      | 1 | [M+Na]+    | 867.74230 | 844.75199 | 1.253 |
| C45H86NO10P    | 1 | [M-2H+K]-  | 868.54610 | 831.59894 | 1.656 |
| C48H82NO9P     | 1 | [M-2H+Na]- | 868.54610 | 847.57272 | 0.793 |
| C49H84NO8P     | 1 | [M+Na]+    | 868.58650 | 845.59346 | 4.399 |
| C46H88NO9P     | 1 | [M+K]+     | 868.58650 | 829.61967 | 4.233 |
| C47H92NO9P     | 1 | [M+Na]+    | 868.63780 | 845.65097 | 2.756 |
| C46H77O13P     | 1 | [M+H]+     | 869.52010 | 868.51018 | 3.043 |
| C45H85O12P     | 1 | [M-2H+Na]- | 869.55060 | 848.57787 | 1.535 |
| C46H87O10P     | 1 | [M+K]+     | 869.56550 | 830.60369 | 1.540 |
| C53H98O6       | 1 | [M+K]+     | 869.70190 | 830.73634 | 2.769 |
| C47H78NO10P    | 1 | [M+Na]+    | 870.52250 | 847.53634 | 3.514 |
| C48H82NO8P     | 1 | [M+K]+     | 870.53860 | 831.57781 | 2.709 |
| C48H84NO9P     | 1 | [M-2H+Na]- | 870.56350 | 849.58837 | 1.219 |
| C45H88NO10P    | 1 | [M-2H+K]-  | 870.56350 | 833.61459 | 0.358 |
| C49H86NO8P     | 1 | [M+Na]+    | 870.60140 | 847.60911 | 3.527 |
| C46H90NO9P     | 1 | [M+K]+     | 870.60140 | 831.63532 | 3.362 |
| C46H90NO10P    | 1 | [M+Na]+    | 870.62340 | 847.63024 | 4.527 |
| C48H88NO10P    | 1 | [M+H]+     | 870.62340 | 869.61459 | 1.771 |
| C50H96NO8P     | 1 | [M+H]+     | 870.69890 | 869.68736 | 4.906 |
| C43H77O13P     | 1 | [M+K]+     | 871.47650 | 832.51018 | 3.633 |
| C46H79O13P     | 1 | [M+H]+     | 871.52950 | 870.52583 | 4.135 |

|             |   |            |           |           |       |
|-------------|---|------------|-----------|-----------|-------|
| C44H81O13P  | 1 | [M+Na]+    | 871.52950 | 848.54148 | 1.383 |
| C50H79O10P  | 1 | [M+H]+     | 871.54650 | 870.54109 | 2.133 |
| C48H81O10P  | 1 | [M+Na]+    | 871.54650 | 848.55674 | 0.620 |
| C45H87O12P  | 2 | [M-2H+Na]- | 871.56570 | 850.59352 | 2.163 |
| C58H88O3    | 1 | [M+K]+     | 871.64040 | 832.67335 | 4.478 |
| C47H93O10P  | 1 | [M+Na]+    | 871.64040 | 848.65064 | 0.620 |
| C48H97O9P   | 1 | [M+Na]+    | 871.67910 | 848.68702 | 3.275 |
| C55H92O6    | 1 | [M+Na]+    | 871.67910 | 848.68939 | 0.559 |
| C54H104O6   | 1 | [M+Na]+    | 871.77600 | 848.78329 | 4.000 |
| C56H102O6   | 1 | [M+H]+     | 871.77600 | 870.76764 | 1.248 |
| C46H92NO9P  | 1 | [M+K]+     | 872.61040 | 833.65097 | 4.266 |
| C42H64O19   | 3 | [M+H]+     | 873.40870 | 872.40419 | 3.155 |
| C47H79O10P  | 1 | [M+K]+     | 873.50510 | 834.54109 | 0.986 |
| C44H85O12P  | 2 | [M-2H+K]-  | 873.52720 | 836.57787 | 0.837 |
| C48H85O9P   | 1 | [M-2H+K]-  | 873.53800 | 836.59312 | 4.263 |
| C57H86O4    | 1 | [M+K]+     | 873.61500 | 834.65261 | 0.871 |
| C47H75N5O8  | 1 | [M-2H+K]-  | 874.51360 | 837.56157 | 3.928 |
| C50H78NO8P  | 1 | [M+Na]+    | 874.53610 | 851.54651 | 0.424 |
| C50H100NO8P | 1 | [M+H]+     | 874.72270 | 873.71866 | 3.690 |
| C43H81O13P  | 1 | [M+K]+     | 875.50680 | 836.54148 | 2.474 |
| C47H81O10P  | 1 | [M+K]+     | 875.52360 | 836.55674 | 4.239 |
| C49H95O10P  | 1 | [M+H]+     | 875.67590 | 874.66629 | 2.673 |
| C55H96O6    | 1 | [M+Na]+    | 875.71340 | 852.72069 | 3.982 |
| C57H94O6    | 1 | [M+H]+     | 875.71340 | 874.70504 | 1.242 |
| C56H106O6   | 1 | [M+H]+     | 875.80280 | 874.79894 | 3.896 |
| C47H51NO14  | 2 | [M+Na]+    | 876.31900 | 853.33096 | 1.348 |
| C48H88NO9P  | 1 | [M+Na]+    | 876.61110 | 853.61967 | 2.517 |
| C47H73O13P  | 1 | [M+H]+     | 877.49000 | 876.47888 | 4.383 |
| C46H85O13P  | 1 | [M+H]+     | 877.57830 | 876.57278 | 1.999 |
| C47H89O12P  | 1 | [M+H]+     | 877.61600 | 876.60917 | 0.500 |
| C48H93O11P  | 1 | [M+H]+     | 877.65450 | 876.64555 | 1.910 |
| C49H97O8PS  | 1 | [M+H]+     | 877.67430 | 876.66418 | 3.245 |
| C56H108O6   | 1 | [M+H]+     | 877.81940 | 876.81459 | 2.805 |
| C48H74NO10P | 1 | [M+Na]+    | 878.49240 | 855.50504 | 2.116 |
| C46H84NO10P | 1 | [M-2H+K]-  | 878.52900 | 841.58329 | 3.287 |
| C48H90NO9P  | 1 | [M+Na]+    | 878.62610 | 855.63532 | 1.771 |
| C50H98NO7P  | 1 | [M+Na]+    | 878.69840 | 855.70809 | 1.236 |
| C48H73O10P  | 1 | [M+K]+     | 879.45880 | 840.49414 | 1.718 |
| C45H77O13P  | 2 | [M+Na]+    | 879.50200 | 856.51018 | 2.951 |
| C47H75O13P  | 5 | [M+H]+     | 879.50480 | 878.49453 | 3.406 |
| C49H97N2O6P | 1 | [M+K]+     | 879.67160 | 840.70843 | 0.026 |
| C48H76NO10P | 3 | [M+Na]+    | 880.51050 | 857.52069 | 0.671 |
| C50H74NO10P | 1 | [M+H]+     | 880.51050 | 879.50504 | 2.053 |
| C49H96NO8P  | 1 | [M+Na]+    | 880.67890 | 857.68736 | 2.635 |
| C51H94NO8P  | 1 | [M+H]+     | 880.67890 | 879.67171 | 0.089 |
| C44H75O13P  | 1 | [M+K]+     | 881.45760 | 842.49453 | 0.095 |
| C48H75O10P  | 2 | [M+K]+     | 881.47290 | 842.50979 | 0.044 |
| C47H77O13P  | 2 | [M+H]+     | 881.51530 | 880.51018 | 2.444 |
| C45H79O13P  | 1 | [M+Na]+    | 881.51530 | 858.52583 | 0.278 |

|                |   |            |           |           |       |
|----------------|---|------------|-----------|-----------|-------|
| C47H89O10P     | 1 | [M-2H+K]-  | 881.56760 | 844.61934 | 0.385 |
| C48H91O10P     | 3 | [M+Na]+    | 881.62280 | 858.63499 | 1.599 |
| C50H89O10P     | 2 | [M+H]+     | 881.62280 | 880.61934 | 4.320 |
| C49H99N2O6P    | 1 | [M+K]+     | 881.68740 | 842.72408 | 0.196 |
| C57H100O6      | 1 | [M+H]+     | 881.75710 | 880.75199 | 2.452 |
| C55H102O6      | 1 | [M+Na]+    | 881.75710 | 858.76764 | 0.269 |
| C48H78NO10P    | 1 | [M+Na]+    | 882.52970 | 859.53634 | 4.692 |
| C46H86NO10P    | 1 | [M+K]+     | 882.55890 | 843.59894 | 3.612 |
| C49H88NO10P    | 2 | [M+H]+     | 882.62360 | 881.61459 | 1.974 |
| C47H90NO10P    | 1 | [M+Na]+    | 882.62360 | 859.63024 | 4.692 |
| C44H77O13P     | 1 | [M+K]+     | 883.47650 | 844.51018 | 3.584 |
| C48H77O10P     | 4 | [M+K]+     | 883.48420 | 844.52544 | 4.968 |
| C47H79O13P     | 1 | [M+H]+     | 883.53280 | 882.52583 | 0.344 |
| C46H87NO13     | 1 | [M+Na]+    | 884.60440 | 861.61775 | 2.901 |
| C44H79O13P     | 2 | [M+K]+     | 885.49280 | 846.52583 | 4.309 |
| C48H79O10P     | 1 | [M+K]+     | 885.50260 | 846.54109 | 1.851 |
| C46H87O12P     | 1 | [M+Na]+    | 885.58510 | 862.59352 | 2.665 |
| C50H93O10P     | 1 | [M+H]+     | 885.65430 | 884.65064 | 4.075 |
| C48H95O10P     | 1 | [M+Na]+    | 885.65430 | 862.66629 | 1.366 |
| C27H44N7O17P3S | 1 | [M+Na]+    | 886.16400 | 863.17273 | 2.310 |
| C51H100NO8P    | 1 | [M+H]+     | 886.72490 | 885.71866 | 1.159 |
| C50H75O10P     | 1 | [M-2H+Na]- | 887.48130 | 866.50979 | 2.879 |
| C45H87O12P     | 2 | [M-2H+K]-  | 887.54070 | 850.59352 | 1.599 |
| C46H89O12P     | 1 | [M+Na]+    | 887.59940 | 864.60917 | 1.138 |
| C25H40N7O18P3S | 1 | [M-2H+K]-  | 888.08630 | 851.13635 | 1.524 |
| C27H46N7O17P3S | 1 | [M+Na]+    | 888.18040 | 865.18838 | 3.149 |
| C47H80NO10P    | 1 | [M+K]+     | 888.51100 | 849.55199 | 4.657 |
| C52H90NO8P     | 1 | [M+H]+     | 888.64610 | 887.64041 | 1.776 |
| C50H92NO8P     | 1 | [M+Na]+    | 888.64610 | 865.65606 | 0.924 |
| C46H75O13P     | 4 | [M+Na]+    | 889.48590 | 866.49453 | 2.412 |
| C47H79O12P     | 1 | [M+Na]+    | 889.52170 | 866.53092 | 1.754 |
| C44H83O13P     | 1 | [M+K]+     | 889.52170 | 850.55713 | 1.592 |
| C44H85NO12S    | 1 | [M+K]+     | 890.54020 | 851.57925 | 2.474 |
| C50H84NO10P    | 1 | [M+H]+     | 890.59450 | 889.58329 | 4.426 |
| C48H91NO11S    | 1 | [M+H]+     | 890.64260 | 889.63129 | 4.538 |
| C50H94NO7P     | 1 | [M+K]+     | 890.64260 | 851.67679 | 2.983 |
| C52H94NO8P     | 1 | [M-H]-     | 890.66790 | 891.67171 | 3.887 |
| C44H85O13P     | 1 | [M+K]+     | 891.53550 | 852.57278 | 0.487 |
| C47H81O12P     | 1 | [M+Na]+    | 891.53550 | 868.54657 | 0.325 |
| C48H91O12P     | 1 | [M+H]+     | 891.62840 | 890.62482 | 4.137 |
| C57H110O6      | 1 | [M+H]+     | 891.83620 | 890.83024 | 1.471 |
| C24H38N7O19P3S | 1 | [M+K]+     | 892.07600 | 853.11561 | 3.096 |
| C47H86NO10P    | 1 | [M-2H+K]-  | 892.54660 | 855.59894 | 1.051 |
| C48H88NO10P    | 1 | [M+Na]+    | 892.59940 | 869.61459 | 4.939 |
| C50H79O10P     | 1 | [M+Na]+    | 893.53110 | 870.54109 | 0.884 |
| C52H76O12      | 2 | [M+H]+     | 893.53660 | 892.53368 | 4.869 |
| C55H98O6       | 1 | [M+K]+     | 893.69790 | 854.73634 | 1.781 |
| C48H76NO10P    | 1 | [M-2H+K]-  | 894.46820 | 857.52069 | 1.216 |
| C50H98NO8P     | 1 | [M+Na]+    | 894.69000 | 871.70301 | 2.491 |

|             |   |            |           |           |       |
|-------------|---|------------|-----------|-----------|-------|
| C46H81O13P  | 1 | [M+Na]+    | 895.52820 | 872.54148 | 2.797 |
| C57H92O6    | 1 | [M+Na]+    | 895.67780 | 872.68939 | 0.908 |
| C58H102O6   | 1 | [M+H]+     | 895.77360 | 894.76764 | 1.465 |
| C56H104O6   | 1 | [M+Na]+    | 895.77360 | 872.78329 | 1.213 |
| C47H88NO10P | 1 | [M+K]+     | 896.57470 | 857.61459 | 3.388 |
| C42H66O18   | 1 | [M+K]+     | 897.38800 | 858.42492 | 0.079 |
| C47H73O13P  | 2 | [M-2H+Na]- | 897.45050 | 876.47888 | 2.730 |
| C47H73O13P  | 2 | [M-2H+Na]- | 897.45660 | 876.47888 | 4.067 |
| C50H84O7P2  | 1 | [M+K]+     | 897.53160 | 858.56923 | 0.871 |
| C48H80NO10P | 1 | [M-2H+K]-  | 898.50050 | 861.55199 | 0.098 |
| C50H92NO10P | 1 | [M+H]+     | 898.65130 | 897.64589 | 2.068 |
| C48H94NO10P | 1 | [M+Na]+    | 898.65130 | 875.66154 | 0.602 |
| C45H81O13P  | 1 | [M+K]+     | 899.50680 | 860.54148 | 2.408 |
| C50H85O10P  | 1 | [M+Na]+    | 899.57420 | 876.58804 | 3.402 |
| C47H89O12P  | 1 | [M+Na]+    | 899.59470 | 876.60917 | 4.102 |
| C46H87NO13  | 2 | [M+K]+     | 900.57850 | 861.61775 | 2.659 |
| C50H94NO10P | 1 | [M+H]+     | 900.66660 | 899.66154 | 2.452 |
| C52H102NO8P | 1 | [M+H]+     | 900.74310 | 899.73431 | 1.690 |
| C45H83O13P  | 1 | [M+K]+     | 901.52270 | 862.55713 | 2.680 |
| C46H89O12P  | 1 | [M-2H+K]-  | 901.55710 | 864.60917 | 0.742 |
| C50H87O10P  | 1 | [M+Na]+    | 901.59480 | 878.60369 | 2.096 |
| C49H89O12P  | 1 | [M+H]+     | 901.61340 | 900.60917 | 3.371 |
| C47H91O12P  | 1 | [M+Na]+    | 901.61340 | 878.62482 | 0.710 |
| C47H98O11P2 | 1 | [M+H]+     | 901.66970 | 900.65844 | 4.423 |
| C56H94O6    | 1 | [M+K]+     | 901.66970 | 862.70504 | 1.672 |
| C58H108O6   | 1 | [M+H]+     | 901.82450 | 900.81459 | 2.925 |
| C50H90NO8P  | 1 | [M+K]+     | 902.60520 | 863.64041 | 1.819 |
| C52H104NO8P | 1 | [M+H]+     | 902.76110 | 901.74996 | 4.289 |
| C49H75O13P  | 1 | [M+H]+     | 903.49800 | 902.49453 | 4.210 |
| C46H89O12P  | 2 | [M+K]+     | 903.56960 | 864.60917 | 3.009 |
| C47H93O12P  | 1 | [M+Na]+    | 903.62750 | 880.64047 | 2.424 |
| C58H110O6   | 1 | [M+H]+     | 903.83730 | 902.83024 | 0.235 |
| C48H84NO10P | 1 | [M+K]+     | 904.54470 | 865.58329 | 1.921 |
| C50H75O10P  | 3 | [M+K]+     | 905.47010 | 866.50979 | 3.135 |
| C47H79O12P  | 3 | [M+K]+     | 905.49700 | 866.53092 | 3.237 |
| C47H79O13P  | 1 | [M+Na]+    | 905.51860 | 882.52583 | 3.915 |
| C49H77O13P  | 3 | [M+H]+     | 905.51930 | 904.51018 | 2.039 |
| C50H78NO10P | 1 | [M+Na]+    | 906.52410 | 883.53634 | 1.609 |
| C48H86NO10P | 1 | [M+K]+     | 906.55790 | 867.59894 | 4.620 |
| C51H98NO8P  | 1 | [M+Na]+    | 906.69550 | 883.70301 | 3.608 |
| C47H81O13P  | 2 | [M+Na]+    | 907.53240 | 884.54148 | 1.868 |
| C49H79O13P  | 6 | [M+H]+     | 907.53740 | 906.52583 | 4.734 |
| C59H102O6   | 2 | [M+H]+     | 907.77250 | 906.76764 | 2.657 |
| C57H104O6   | 2 | [M+Na]+    | 907.77250 | 884.78329 | 0.014 |
| C48H89NO13  | 1 | [M-2H+Na]- | 908.60930 | 887.63340 | 2.024 |
| C50H79O10P  | 3 | [M+K]+     | 909.50680 | 870.54109 | 2.816 |
| C47H83O13P  | 1 | [M+Na]+    | 909.54350 | 886.55713 | 3.139 |
| C46H95O11PS | 1 | [M+Na]+    | 909.61980 | 886.63328 | 2.966 |
| C50H95O10P  | 3 | [M+Na]+    | 909.65530 | 886.66629 | 0.231 |

|                |   |            |           |           |       |
|----------------|---|------------|-----------|-----------|-------|
| C50H82NO10P    | 1 | [M+Na]+    | 910.55840 | 887.56764 | 1.692 |
| C49H94NO10P    | 1 | [M+Na]+    | 910.65510 | 887.66154 | 4.767 |
| C50H97O10P     | 1 | [M+Na]+    | 911.67150 | 888.68194 | 0.373 |
| C27H44N7O20P3S | 1 | [M+H]+     | 912.16030 | 911.15748 | 4.875 |
| C46H83O13P     | 1 | [M+K]+     | 913.52230 | 874.55713 | 2.207 |
| C48H91O12P     | 2 | [M+Na]+    | 913.61120 | 890.62482 | 3.109 |
| C59H108O6      | 1 | [M+H]+     | 913.82310 | 912.81459 | 1.355 |
| C47H73O13P     | 1 | [M+K]+     | 915.43850 | 876.47888 | 3.860 |
| C43H72O19      | 1 | [M+Na]+    | 915.45270 | 892.46679 | 3.612 |
| C52H76O12      | 1 | [M+Na]+    | 915.51960 | 892.53368 | 3.607 |
| C50H87O10P     | 1 | [M-2H+K]-  | 915.55450 | 878.60369 | 2.415 |
| C48H93O12P     | 1 | [M+Na]+    | 915.63330 | 892.64047 | 3.943 |
| C60H98O6       | 1 | [M+H]+     | 915.74100 | 914.73634 | 2.852 |
| C58H100O6      | 1 | [M+Na]+    | 915.74100 | 892.75199 | 0.233 |
| C59H110O6      | 1 | [M+H]+     | 915.83690 | 914.83024 | 0.668 |
| C52H96NO8P     | 1 | [M+Na]+    | 916.67880 | 893.68736 | 2.423 |
| C50H74NO10P    | 1 | [M+K]+     | 918.47250 | 879.50504 | 4.695 |
| C50H95NO13     | 1 | [M+H]+     | 918.68400 | 917.68035 | 3.935 |
| C31H52N7O17P3S | 1 | [M+H]+     | 920.24200 | 919.23533 | 0.654 |
| C49H87O12P     | 1 | [M+Na]+    | 921.58400 | 898.59352 | 1.367 |
| C49H93O13P     | 1 | [M+H]+     | 921.64090 | 920.63538 | 1.903 |
| C50H97O12P     | 1 | [M+H]+     | 921.68130 | 920.67177 | 2.453 |
| C60H104O6      | 1 | [M+H]+     | 921.78660 | 920.78329 | 4.298 |
| C58H106O6      | 1 | [M+Na]+    | 921.78660 | 898.79894 | 1.696 |
| C49H75O13P     | 1 | [M-2H+Na]- | 923.46800 | 902.49453 | 0.650 |
| C50H83O13P     | 1 | [M+H]+     | 923.56670 | 922.55713 | 2.486 |
| C58H92O6       | 2 | [M+K]+     | 923.65290 | 884.68939 | 0.388 |
| C49H95O13P     | 1 | [M+H]+     | 923.65500 | 922.65103 | 3.577 |
| C49H75O13P     | 1 | [M+Na]+    | 925.48200 | 902.49453 | 1.896 |
| C49H77O13P     | 1 | [M-2H+Na]- | 925.48210 | 904.51018 | 2.323 |
| C48H87O13P     | 1 | [M+Na]+    | 925.58200 | 902.58843 | 4.694 |
| C50H85O13P     | 1 | [M+H]+     | 925.58200 | 924.57278 | 2.102 |
| C61H96O6       | 1 | [M+H]+     | 925.73080 | 924.72069 | 3.066 |
| C49H93O12P     | 2 | [M+Na]+    | 927.62560 | 904.64047 | 4.409 |
| C55H92O7P2     | 1 | [M+H]+     | 927.64110 | 926.63183 | 2.154 |
| C54H108NO8P    | 2 | [M-H]-     | 928.77130 | 929.78126 | 2.894 |
| C54H108NO8P    | 2 | [M-H]-     | 928.77830 | 929.78126 | 4.643 |
| C51H77O13P     | 2 | [M+H]+     | 929.51440 | 928.51018 | 3.286 |
| C47H87O13P     | 1 | [M+K]+     | 929.55590 | 890.58843 | 4.643 |
| C50H99O10P     | 1 | [M+K]+     | 929.66000 | 890.69759 | 0.795 |
| C50H86NO10P    | 1 | [M+K]+     | 930.56400 | 891.59894 | 2.055 |
| C56H99NO9      | 1 | [M+H]+     | 930.74320 | 929.73199 | 4.239 |
| C48H77O13P     | 1 | [M+K]+     | 931.47100 | 892.51018 | 2.506 |
| C49H81O13P     | 1 | [M+Na]+    | 931.53450 | 908.54148 | 4.074 |
| C51H79O13P     | 1 | [M+H]+     | 931.53450 | 930.52583 | 1.499 |
| C50H91O13P     | 1 | [M+H]+     | 931.63040 | 930.61973 | 3.645 |
| C61H102O6      | 1 | [M+H]+     | 931.77810 | 930.76764 | 3.421 |
| C48H79O13P     | 1 | [M+K]+     | 933.49080 | 894.52583 | 1.945 |
| C46H76O19      | 4 | [M+H]+     | 933.50090 | 932.49809 | 4.773 |

|                |   |                        |           |           |       |
|----------------|---|------------------------|-----------|-----------|-------|
| C51H80015      | 1 | [M+H] <sup>+</sup>     | 933.55380 | 932.54973 | 3.423 |
| C47H91013P     | 2 | [M+K] <sup>+</sup>     | 933.58150 | 894.61973 | 1.482 |
| C49H85012P     | 1 | [M+K] <sup>+</sup>     | 935.53980 | 896.57787 | 1.303 |
| C58H10406      | 1 | [M+K] <sup>+</sup>     | 935.74230 | 896.78329 | 4.426 |
| C48H83013P     | 1 | [M+K] <sup>+</sup>     | 937.52160 | 898.55713 | 1.404 |
| C51H85013P     | 2 | [M+H] <sup>+</sup>     | 937.57730 | 936.57278 | 2.937 |
| C49H87013P     | 2 | [M+Na] <sup>+</sup>    | 937.57730 | 914.58843 | 0.379 |
| C59H9406       | 1 | [M+K] <sup>+</sup>     | 937.66590 | 898.70504 | 2.444 |
| C46H76017      | 1 | [M+K] <sup>+</sup>     | 939.46900 | 900.50826 | 2.561 |
| C48H85013P     | 1 | [M+K] <sup>+</sup>     | 939.53150 | 900.57278 | 4.719 |
| C49H89013P     | 1 | [M+Na] <sup>+</sup>    | 939.59780 | 916.60408 | 4.784 |
| C51H87013P     | 1 | [M+H] <sup>+</sup>     | 939.59780 | 938.58843 | 2.231 |
| C31H52N7O17P3S | 1 | [M-2H+Na] <sup>-</sup> | 940.21160 | 919.23533 | 2.342 |
| C49H91012P     | 1 | [M+K] <sup>+</sup>     | 941.59060 | 902.62482 | 2.794 |
| C49H79013P     | 1 | [M-2H+K] <sup>-</sup>  | 943.47780 | 906.52583 | 3.568 |
| C58H11206      | 1 | [M+K] <sup>+</sup>     | 943.81050 | 904.84589 | 1.545 |
| C48H91013P     | 1 | [M+K] <sup>+</sup>     | 945.58250 | 906.61973 | 0.406 |
| C51H87012P     | 1 | [M+Na] <sup>+</sup>    | 945.58250 | 922.59352 | 0.254 |
| C49H95012P     | 1 | [M+K] <sup>+</sup>     | 945.62310 | 906.65612 | 4.051 |
| C51H93013P     | 1 | [M+H] <sup>+</sup>     | 945.64610 | 944.63538 | 3.644 |
| C61H11806      | 4 | [M-H] <sup>-</sup>     | 945.88890 | 946.89284 | 3.518 |
| C48H93013P     | 2 | [M+K] <sup>+</sup>     | 947.59490 | 908.63538 | 3.835 |
| C51H89012P     | 2 | [M+Na] <sup>+</sup>    | 947.59490 | 924.60917 | 3.683 |
| C51H95013P     | 1 | [M+H] <sup>+</sup>     | 947.66090 | 946.65103 | 2.739 |
| C60H10806      | 1 | [M+Na] <sup>+</sup>    | 947.80700 | 924.81459 | 3.363 |
| C62H10606      | 1 | [M+H] <sup>+</sup>     | 947.80700 | 946.79894 | 0.831 |
| C61H11806      | 1 | [M+H] <sup>+</sup>     | 947.90290 | 946.89284 | 2.941 |
| C33H56N7O17P3S | 1 | [M+H] <sup>+</sup>     | 948.27200 | 947.26663 | 2.006 |
| C49H83013P     | 1 | [M+K] <sup>+</sup>     | 949.52350 | 910.55713 | 3.387 |
| C46H82016P2    | 1 | [M-H] <sup>-</sup>     | 951.49950 | 952.50782 | 1.100 |
| C51H79013P     | 1 | [M-2H+Na] <sup>-</sup> | 951.49950 | 930.52583 | 0.420 |
| C51H93012P     | 1 | [M+Na] <sup>+</sup>    | 951.62820 | 928.64047 | 1.566 |
| C61H10006      | 1 | [M+Na] <sup>+</sup>    | 951.74290 | 928.75199 | 1.773 |
| C63H9806       | 1 | [M+H] <sup>+</sup>     | 951.74290 | 950.73634 | 0.748 |
| C60H11206      | 1 | [M+Na] <sup>+</sup>    | 951.83890 | 928.84589 | 3.979 |
| C62H11006      | 1 | [M+H] <sup>+</sup>     | 951.83890 | 950.83024 | 1.458 |
| C43H82016P2    | 1 | [M-2H+K] <sup>-</sup>  | 953.45840 | 916.50782 | 2.080 |
| C51H95012P     | 1 | [M+Na] <sup>+</sup>    | 953.64400 | 930.65612 | 1.405 |
| C61H10406      | 1 | [M+Na] <sup>+</sup>    | 955.77460 | 932.78329 | 2.184 |
| C63H10206      | 1 | [M+H] <sup>+</sup>     | 955.77460 | 954.76764 | 0.326 |
| C50H95013P     | 3 | [M+Na] <sup>+</sup>    | 957.64440 | 934.65103 | 4.328 |
| C52H93013P     | 2 | [M+H] <sup>+</sup>     | 957.64440 | 956.63538 | 1.823 |
| C60H10206      | 1 | [M+K] <sup>+</sup>     | 957.73150 | 918.76764 | 0.739 |
| C52H72014      | 1 | [M+K] <sup>+</sup>     | 959.45810 | 920.49221 | 2.855 |
| C53H83013P     | 1 | [M+H] <sup>+</sup>     | 959.56190 | 958.55713 | 2.610 |
| C61H9406       | 1 | [M-2H+K] <sup>-</sup>  | 959.65390 | 922.70504 | 0.269 |
| C62H9606       | 1 | [M+Na] <sup>+</sup>    | 959.71270 | 936.72069 | 2.904 |
| C31H54N7O17P3S | 1 | [M+K] <sup>+</sup>     | 960.21320 | 921.25098 | 0.971 |
| C50H100N012P   | 1 | [M+Na] <sup>+</sup>    | 960.69200 | 937.69832 | 4.644 |



|                 |   |            |           |           |       |
|-----------------|---|------------|-----------|-----------|-------|
| C51H89O12P      | 1 | [M-2H+K]-  | 961.55870 | 924.60917 | 0.968 |
| C45H82O15P2     | 1 | [M+K]+     | 963.47130 | 924.51290 | 4.932 |
| C52H76O14       | 4 | [M+K]+     | 963.49020 | 924.52351 | 3.673 |
| C63H112O6       | 3 | [M-H]-     | 963.84010 | 964.84589 | 1.533 |
| C61H114O6       | 1 | [M-2H+Na]- | 963.84010 | 942.86154 | 4.661 |
| C54H104NO8P     | 1 | [M+K]+     | 964.71120 | 925.74996 | 1.978 |
| C57H106NO8P     | 1 | [M+H]+     | 964.76840 | 963.76561 | 4.642 |
| C50H87O13P      | 1 | [M+K]+     | 965.55050 | 926.58843 | 1.123 |
| C51H91O13P      | 1 | [M+Na]+    | 965.61330 | 942.61973 | 4.500 |
| C53H89O13P      | 1 | [M+H]+     | 965.61330 | 964.60408 | 2.015 |
| C61H98O6        | 1 | [M+K]+     | 965.69620 | 926.73634 | 3.409 |
| C62H102O6       | 1 | [M+Na]+    | 965.75350 | 942.76764 | 3.482 |
| C60H110O6       | 1 | [M+K]+     | 965.79320 | 926.83024 | 0.199 |
| C63H114O6       | 3 | [M-H]-     | 965.85560 | 966.86154 | 1.375 |
| C61H116O6       | 2 | [M-2H+Na]- | 965.85560 | 944.87719 | 4.496 |
| C33H58N7O18P3S  | 1 | [M+H]+     | 966.28090 | 965.27720 | 3.691 |
| C54H95NO13      | 1 | [M+H]+     | 966.68980 | 965.68035 | 2.260 |
| C63H116O6       | 2 | [M-H]-     | 967.87260 | 968.87719 | 2.767 |
| C63H116O6       | 2 | [M-H]-     | 967.87330 | 968.87719 | 3.490 |
| C52H99NO13      | 1 | [M+Na]+    | 968.69660 | 945.71165 | 4.404 |
| C46H76O19       | 1 | [M-2H+K]-  | 969.45040 | 932.49809 | 3.831 |
| C53H93O13P      | 2 | [M+H]+     | 969.64660 | 968.63538 | 4.070 |
| C63H94O6        | 1 | [M+Na]+    | 969.69790 | 946.70504 | 3.751 |
| C46H76O19       | 1 | [M+K]+     | 971.45780 | 932.49809 | 3.537 |
| C51H81O13P      | 1 | [M+K]+     | 971.50150 | 932.54148 | 3.226 |
| C51H97O13P      | 2 | [M+Na]+    | 971.65180 | 948.66668 | 4.225 |
| C51H83O13P      | 1 | [M+K]+     | 973.52510 | 934.55713 | 4.947 |
| C51H99O12P      | 2 | [M+K]+     | 973.64900 | 934.68742 | 1.611 |
| C65H98O6        | 1 | [M-H]-     | 973.72640 | 974.73634 | 2.744 |
| C63H100O6       | 1 | [M-2H+Na]- | 973.72640 | 952.75199 | 0.351 |
| C65H96O6        | 1 | [M+H]+     | 973.72900 | 972.72069 | 1.066 |
| C64H108O6       | 1 | [M+H]+     | 973.82560 | 972.81459 | 3.838 |
| C32H56N7O17P3S  | 1 | [M+K]+     | 974.22890 | 935.26663 | 0.905 |
| C51H101O12P     | 1 | [M+K]+     | 975.66670 | 936.70307 | 0.493 |
| C53H99O13P      | 1 | [M+H]+     | 975.68620 | 974.68233 | 3.489 |
| C56H108NO8P     | 1 | [M+Na]+    | 976.77400 | 953.78126 | 3.605 |
| C61H94O8        | 1 | [M+Na]+    | 977.68190 | 954.69487 | 2.243 |
| C36H56NNa3O17S3 | 1 | [M+K]+     | 978.20030 | 939.24036 | 3.276 |
| C51H91O13P      | 2 | [M-2H+K]-  | 979.57160 | 942.61973 | 3.334 |
| C51H91O13P      | 2 | [M-2H+K]-  | 979.57300 | 942.61973 | 4.763 |
| C52H93O13P      | 1 | [M+Na]+    | 979.62820 | 956.63538 | 3.670 |
| C64H116O6       | 1 | [M-H]-     | 979.86530 | 980.87719 | 4.717 |
| C62H118O6       | 1 | [M-2H+Na]- | 979.86530 | 958.89284 | 1.641 |
| C62H116O6       | 1 | [M+Na]+    | 979.87030 | 956.87719 | 3.967 |
| C64H114O6       | 1 | [M+H]+     | 979.87030 | 978.86154 | 1.519 |
| C62H102O6       | 1 | [M+K]+     | 981.73470 | 942.76764 | 3.981 |
| C63H92O6        | 1 | [M+K]+     | 983.65430 | 944.68939 | 1.787 |
| C52H97O13P      | 1 | [M+Na]+    | 983.65430 | 960.66668 | 1.632 |
| C63H98O8        | 1 | [M+H]+     | 983.73220 | 982.72617 | 1.263 |

|                |   |            |            |            |       |
|----------------|---|------------|------------|------------|-------|
| C65H108O6      | 3 | [M-H]-     | 983.80280  | 984.81459  | 4.596 |
| C63H110O6      | 2 | [M-2H+Na]- | 983.80280  | 962.83024  | 1.533 |
| C65H108O6      | 3 | [M-H]-     | 983.80480  | 984.81459  | 2.564 |
| C63H110O6      | 2 | [M-2H+Na]- | 983.80480  | 962.83024  | 0.500 |
| C65H108O6      | 3 | [M-H]-     | 983.81170  | 984.81459  | 4.450 |
| C61H118O6      | 4 | [M-2H+K]-  | 983.84130  | 946.89284  | 0.144 |
| C61H118O6      | 4 | [M-2H+K]-  | 983.84190  | 946.89284  | 0.466 |
| C61H118O6      | 4 | [M-2H+K]-  | 983.84380  | 946.89284  | 2.397 |
| C33H56N7O18P3S | 2 | [M-2H+Na]- | 984.23940  | 963.26155  | 3.848 |
| C52H99NO13     | 1 | [M+K]+     | 984.67090  | 945.71165  | 3.956 |
| C52H101NO13    | 1 | [M-2H+K]-  | 984.67630  | 947.72730  | 0.410 |
| C58H116NO8P    | 4 | [M-H]-     | 984.83240  | 985.84386  | 4.252 |
| C51H97O13P     | 1 | [M-2H+K]-  | 985.61800  | 948.66668  | 2.756 |
| C63H112O6      | 3 | [M-2H+Na]- | 985.82030  | 964.84589  | 0.347 |
| C65H110O6      | 2 | [M-H]-     | 985.82030  | 986.83024  | 2.710 |
| C63H112O6      | 3 | [M-2H+Na]- | 985.82300  | 964.84589  | 3.086 |
| C65H110O6      | 2 | [M-H]-     | 985.82300  | 986.83024  | 0.028 |
| C65H108O6      | 1 | [M+H]+     | 985.82650  | 984.81459  | 4.705 |
| C64H120O6      | 1 | [M+H]+     | 985.91100  | 984.90849  | 4.830 |
| C33H58N7O18P3S | 1 | [M-2H+Na]- | 986.25230  | 965.27720  | 1.051 |
| C54H95NO13     | 1 | [M-2H+Na]- | 986.65040  | 965.68035  | 4.065 |
| C57H105NO9     | 1 | [M+K]+     | 986.74430  | 947.77894  | 2.244 |
| C63H114O6      | 3 | [M-2H+Na]- | 987.83280  | 966.86154  | 2.843 |
| C65H112O6      | 1 | [M+H]+     | 989.84900  | 988.84589  | 4.205 |
| C63H114O6      | 1 | [M+Na]+    | 989.84900  | 966.86154  | 1.781 |
| C46H82O16P2    | 1 | [M+K]+     | 991.46850  | 952.50782  | 2.488 |
| C65H114O6      | 1 | [M+H]+     | 991.87300  | 990.86154  | 4.222 |
| C55H104O13     | 1 | [M-2H+Na]- | 993.72010  | 972.74770  | 1.674 |
| C63H120O6      | 1 | [M+Na]+    | 995.90210  | 972.90849  | 4.405 |
| C65H118O6      | 1 | [M+H]+     | 995.90210  | 994.89284  | 1.996 |
| C54H103NO13    | 1 | [M+Na]+    | 996.72890  | 973.74295  | 3.278 |
| C53H83O13P     | 1 | [M+K]+     | 997.51990  | 958.55713  | 0.385 |
| C63H106O6      | 1 | [M+K]+     | 997.75740  | 958.79894  | 4.703 |
| C64H110O6      | 1 | [M+Na]+    | 997.81500  | 974.83024  | 4.473 |
| C35H60N7O17P3S | 1 | [M+Na]+    | 998.28420  | 975.29793  | 2.958 |
| C64H114O6      | 1 | [M-2H+Na]- | 999.83320  | 978.86154  | 2.408 |
| C66H110O6      | 1 | [M+H]+     | 999.84220  | 998.83024  | 4.689 |
| C65H124O6      | 2 | [M-H]-     | 999.93120  | 1000.93979 | 1.322 |
| C65H124O6      | 2 | [M-H]-     | 999.93430  | 1000.93979 | 1.778 |
| C33H56N7O18P3S | 2 | [M-2H+K]-  | 1000.20790 | 963.26155  | 2.247 |
| C56H105NO13    | 1 | [M+H]+     | 1000.76200 | 999.75860  | 3.863 |
| C53H89O13P     | 1 | [M-2H+K]-  | 1001.55310 | 964.60408  | 0.415 |
| C53H87O13P     | 1 | [M+K]+     | 1001.55390 | 962.58843  | 2.312 |
| C52H99O13P     | 2 | [M+K]+     | 1001.64600 | 962.68233  | 0.515 |
| C65H106O6      | 1 | [M-2H+Na]- | 1003.77550 | 982.79894  | 2.483 |
| C67H104O6      | 1 | [M-H]-     | 1003.77550 | 1004.78329 | 0.520 |
| C63H112O6      | 1 | [M+K]+     | 1003.81160 | 964.84589  | 2.548 |
| C64H116O6      | 1 | [M+Na]+    | 1003.86370 | 980.87719  | 2.703 |
| C53H93O13P     | 1 | [M-2H+K]-  | 1005.58360 | 968.63538  | 0.382 |

|               |   |            |            |            |       |
|---------------|---|------------|------------|------------|-------|
| C58H116NO8P   | 4 | [M-2H+Na]- | 1006.81440 | 985.84386  | 3.500 |
| C58H116NO8P   | 4 | [M-2H+Na]- | 1006.81530 | 985.84386  | 2.606 |
| C58H116NO8P   | 4 | [M-2H+Na]- | 1006.81710 | 985.84386  | 0.818 |
| C64H104O6     | 1 | [M+K]+     | 1007.74390 | 968.78329  | 2.522 |
| C56H106O13    | 1 | [M+Na]+    | 1009.74810 | 986.76335  | 4.425 |
| C64H106O6     | 1 | [M+K]+     | 1009.76250 | 970.79894  | 0.404 |
| C65H110O6     | 1 | [M+Na]+    | 1009.81520 | 986.83024  | 4.222 |
| C65H112O6     | 1 | [M-2H+Na]- | 1009.82170 | 988.84589  | 1.725 |
| C67H110O6     | 1 | [M-H]-     | 1009.82170 | 1010.83024 | 1.260 |
| C66H125NO5    | 3 | [M-H]-     | 1010.94720 | 1011.95578 | 1.292 |
| C64H124O6     | 1 | [M+Na]+    | 1011.93070 | 988.93979  | 1.667 |
| C65H98O6      | 3 | [M+K]+     | 1013.70150 | 974.73634  | 1.981 |
| C66H128O6     | 1 | [M-H]-     | 1015.96590 | 1016.97109 | 2.045 |
| C65H102O6     | 1 | [M+K]+     | 1017.73220 | 978.76764  | 1.383 |
| C65H120O6     | 1 | [M+Na]+    | 1019.89400 | 996.90849  | 3.641 |
| C57H108NO9P   | 1 | [M+K]+     | 1020.74140 | 981.77617  | 2.035 |
| C67H122O6     | 1 | [M-H]-     | 1021.92020 | 1022.92414 | 3.257 |
| C56H106O14    | 2 | [M-2H+Na]- | 1023.72850 | 1002.75826 | 3.739 |
| C56H106O14    | 2 | [M-2H+Na]- | 1023.73190 | 1002.75826 | 0.418 |
| C65H126O6     | 1 | [M-2H+Na]- | 1023.92620 | 1002.95544 | 3.231 |
| C67H130O6     | 6 | [M-H]-     | 1029.98050 | 1030.98674 | 0.998 |
| C68H120O6     | 1 | [M-H]-     | 1031.90360 | 1032.90849 | 2.304 |
| C66H125NO5    | 3 | [M-2H+Na]- | 1032.92920 | 1011.95578 | 0.622 |
| C66H125NO5    | 3 | [M-2H+Na]- | 1032.93050 | 1011.95578 | 0.637 |
| C65H120O6     | 1 | [M-2H+K]-  | 1033.86070 | 996.90849  | 3.490 |
| C68H126O6     | 3 | [M-H]-     | 1037.95180 | 1038.95544 | 3.495 |
| C68H128O6     | 3 | [M-H]-     | 1039.96510 | 1040.97109 | 1.229 |
| C68H128O6     | 3 | [M-H]-     | 1039.96660 | 1040.97109 | 2.671 |
| C68H130O6     | 1 | [M-H]-     | 1041.97440 | 1042.98674 | 4.868 |
| C58H103NO13   | 1 | [M-2H+Na]- | 1042.71810 | 1021.74295 | 1.043 |
| C69H120O6     | 1 | [M-H]-     | 1043.90600 | 1044.90849 | 4.577 |
| C68H132O6     | 3 | [M-H]-     | 1043.99020 | 1045.00239 | 4.715 |
| C67H108O6     | 1 | [M-2H+K]-  | 1045.76400 | 1008.81459 | 0.773 |
| C67H128O6     | 5 | [M-2H+Na]- | 1049.94100 | 1028.97109 | 3.960 |
| C69H126O6     | 5 | [M-H]-     | 1049.94320 | 1050.95544 | 4.735 |
| C67H128O6     | 5 | [M-2H+Na]- | 1049.94320 | 1028.97109 | 1.865 |
| C69H126O6     | 5 | [M-H]-     | 1049.95310 | 1050.95544 | 4.694 |
| C54H101NO18   | 1 | [M-H]-     | 1050.69740 | 1051.70187 | 2.664 |
| C67H130O6     | 6 | [M-2H+Na]- | 1051.95920 | 1030.98674 | 1.529 |
| C69H128O6     | 5 | [M-H]-     | 1051.95920 | 1052.97109 | 4.394 |
| C67H130O6     | 6 | [M-2H+Na]- | 1051.96250 | 1030.98674 | 1.608 |
| C69H128O6     | 5 | [M-H]-     | 1051.96250 | 1052.97109 | 1.257 |
| C67H130O6     | 6 | [M-2H+Na]- | 1051.96490 | 1030.98674 | 3.890 |
| C69H128O6     | 5 | [M-H]-     | 1051.96490 | 1052.97109 | 1.025 |
| C43H77N3O20P2 | 1 | [M-2H+K]-  | 1054.40540 | 1017.45757 | 0.733 |
| C69H132O6     | 5 | [M-H]-     | 1055.99840 | 1057.00239 | 3.104 |
| C68H108O6     | 1 | [M-2H+K]-  | 1057.76500 | 1020.81459 | 1.709 |
| C69H134O6     | 2 | [M-H]-     | 1058.00720 | 1059.01804 | 3.376 |
| C68H126O6     | 3 | [M-2H+Na]- | 1059.93270 | 1038.95544 | 3.012 |

|                |   |            |            |            |       |
|----------------|---|------------|------------|------------|-------|
| C52H86O22      | 2 | [M-H]-     | 1061.55270 | 1062.56108 | 1.048 |
| C52H86O22      | 2 | [M-H]-     | 1061.55410 | 1062.56108 | 0.271 |
| C69H116O6      | 1 | [M-2H+Na]- | 1061.85040 | 1040.87719 | 0.808 |
| C52H88O22      | 1 | [M-H]-     | 1063.56420 | 1064.57673 | 4.947 |
| C67H128O6      | 5 | [M-2H+K]-  | 1065.92360 | 1028.97109 | 3.666 |
| C67H128O6      | 5 | [M-2H+K]-  | 1065.92380 | 1028.97109 | 3.854 |
| C67H128O6      | 5 | [M-2H+K]-  | 1065.92490 | 1028.97109 | 4.886 |
| C67H130O6      | 6 | [M-2H+K]-  | 1067.93290 | 1030.98674 | 2.287 |
| C67H130O6      | 6 | [M-2H+K]-  | 1067.93380 | 1030.98674 | 1.444 |
| C69H124O6      | 2 | [M-2H+Na]- | 1069.90970 | 1048.93979 | 3.886 |
| C69H124O6      | 2 | [M-2H+Na]- | 1069.91180 | 1048.93979 | 1.924 |
| C51H86O21      | 1 | [M-2H+K]-  | 1071.51790 | 1034.56617 | 2.924 |
| C69H126O6      | 5 | [M-2H+Na]- | 1071.92960 | 1050.95544 | 0.086 |
| C68H126O6      | 3 | [M-2H+K]-  | 1075.90350 | 1038.95544 | 0.504 |
| C68H128O6      | 3 | [M-2H+K]-  | 1077.91550 | 1040.97109 | 3.889 |
| C69H132O6      | 5 | [M-2H+Na]- | 1077.97170 | 1057.00239 | 4.414 |
| C69H132O6      | 5 | [M-2H+Na]- | 1077.97630 | 1057.00239 | 0.147 |
| C69H134O6      | 2 | [M-2H+Na]- | 1079.99030 | 1059.01804 | 1.674 |
| C68H132O6      | 3 | [M-2H+K]-  | 1081.94810 | 1045.00239 | 2.673 |
| C68H132O6      | 3 | [M-2H+K]-  | 1081.95330 | 1045.00239 | 2.133 |
| C69H126O6      | 5 | [M-2H+K]-  | 1087.90680 | 1050.95544 | 2.535 |
| C69H126O6      | 5 | [M-2H+K]-  | 1087.90870 | 1050.95544 | 4.282 |
| C41H64N7O17P3S | 1 | [M-2H+K]-  | 1088.27420 | 1051.32923 | 3.337 |
| C69H128O6      | 5 | [M-2H+K]-  | 1089.91460 | 1052.97109 | 4.672 |
| C69H130O6      | 1 | [M-2H+K]-  | 1091.93730 | 1054.98674 | 1.793 |
| C69H132O6      | 5 | [M-2H+K]-  | 1093.95090 | 1057.00239 | 0.084 |
| C69H132O6      | 5 | [M-2H+K]-  | 1093.95570 | 1057.00239 | 4.304 |
| C45H70N7O17P3S | 1 | [M-H]-     | 1104.37160 | 1105.37618 | 2.434 |
| C80H132O       | 1 | [M-H]-     | 1108.02130 | 1109.02782 | 0.680 |
| C53H86O23      | 1 | [M-2H+Na]- | 1111.52520 | 1090.55600 | 4.375 |
| C54H94O22      | 2 | [M-2H+Na]- | 1115.59290 | 1094.62360 | 4.272 |
| C54H94O22      | 2 | [M-2H+Na]- | 1115.59300 | 1094.62360 | 4.183 |
| C43H68N7O17P3S | 1 | [M-2H+K]-  | 1116.31130 | 1079.36053 | 1.942 |
| C43H76N7O17P3S | 1 | [M-2H+K]-  | 1124.37710 | 1087.42313 | 4.774 |
| C62H115NO18    | 1 | [M-H]-     | 1160.80260 | 1161.81142 | 1.336 |
| C47H86N7O17P3S | 2 | [M-2H+Na]- | 1166.47030 | 1145.50138 | 4.414 |
| C62H116N2O18   | 3 | [M-H]-     | 1175.81170 | 1176.82232 | 2.849 |
| C62H116N2O18   | 3 | [M-H]-     | 1175.81350 | 1176.82232 | 1.318 |
| C62H116N2O18   | 3 | [M-H]-     | 1175.81490 | 1176.82232 | 0.128 |
| C85H140O       | 6 | [M-H]-     | 1176.07750 | 1177.09042 | 4.802 |
| C85H140O       | 6 | [M-H]-     | 1176.08330 | 1177.09042 | 0.130 |
| C85H140O       | 6 | [M-H]-     | 1176.08560 | 1177.09042 | 2.086 |
| C85H140O       | 6 | [M-H]-     | 1176.08640 | 1177.09042 | 2.766 |
| C85H140O       | 6 | [M-2H+Na]- | 1198.06250 | 1177.09042 | 1.655 |
| C85H140O       | 6 | [M-2H+Na]- | 1198.06870 | 1177.09042 | 3.520 |
| C48H80N7O19P3S | 1 | [M-2H+Na]- | 1204.41880 | 1183.44426 | 0.391 |
| C85H140O       | 6 | [M-2H+K]-  | 1214.03420 | 1177.09042 | 3.968 |
| C85H140O       | 6 | [M-2H+K]-  | 1214.03810 | 1177.09042 | 0.755 |
| C61H118O21S    | 1 | [M-H]-     | 1217.78560 | 1218.78864 | 3.474 |

|               |   |            |            |            |       |
|---------------|---|------------|------------|------------|-------|
| C63H112O16P2  | 1 | [M-2H+K]-  | 1223.69240 | 1186.74257 | 1.008 |
| C62H115NO22   | 2 | [M-H]-     | 1224.78770 | 1225.79108 | 3.175 |
| C57H92O27     | 1 | [M-2H+Na]- | 1229.55250 | 1208.58261 | 3.394 |
| C90H148O      | 1 | [M-H]-     | 1244.14380 | 1245.15302 | 1.566 |
| C66H120O17P2  | 1 | [M-H]-     | 1245.79540 | 1246.80008 | 2.077 |
| C62H115NO21   | 1 | [M-2H+K]-  | 1246.74720 | 1209.79617 | 1.952 |
| C62H115NO22   | 2 | [M-2H+K]-  | 1262.74500 | 1225.79108 | 4.212 |
| C65H120N2O21  | 2 | [M-H]-     | 1263.83600 | 1264.83837 | 3.881 |
| C57H96O28     | 1 | [M-2H+K]-  | 1265.55620 | 1228.60882 | 0.966 |
| C82H154O6     | 2 | [M-2H+K]-  | 1272.12390 | 1235.17454 | 0.595 |
| C82H154O6     | 2 | [M-2H+K]-  | 1272.12620 | 1235.17454 | 2.403 |
| C65H121NO21   | 1 | [M-2H+Na]- | 1272.81500 | 1251.84312 | 1.714 |
| C64H119NO22   | 1 | [M-2H+K]-  | 1290.76700 | 1253.82238 | 3.084 |
| C67H124N2O21  | 5 | [M-H]-     | 1291.86020 | 1292.86967 | 1.699 |
| C76H142O15    | 3 | [M-H]-     | 1294.02930 | 1295.03488 | 1.308 |
| C65H120N2O21  | 2 | [M-2H+K]-  | 1301.78060 | 1264.83837 | 4.889 |
| C66H123NO21   | 1 | [M-2H+K]-  | 1302.81160 | 1265.85877 | 3.250 |
| C64H118N2O23  | 1 | [M-2H+Na]- | 1303.78760 | 1282.81255 | 0.759 |
| C66H122N2O23  | 1 | [M-H]-     | 1309.83130 | 1310.84385 | 4.027 |
| C67H122N2O21  | 1 | [M-2H+Na]- | 1311.82260 | 1290.85402 | 4.178 |
| C68H125NO21   | 3 | [M-2H+Na]- | 1312.84530 | 1291.87442 | 2.424 |
| C68H125NO21   | 3 | [M-2H+Na]- | 1312.84920 | 1291.87442 | 0.547 |
| C67H124N2O21  | 5 | [M-2H+Na]- | 1313.83790 | 1292.86967 | 4.438 |
| C67H124N2O21  | 5 | [M-2H+Na]- | 1313.84460 | 1292.86967 | 0.661 |
| C68H127NO21   | 2 | [M-2H+Na]- | 1314.86870 | 1293.89007 | 3.474 |
| C76H142O15    | 3 | [M-2H+Na]- | 1316.00650 | 1295.03488 | 1.857 |
| C68H125NO23   | 2 | [M-H]-     | 1322.85500 | 1323.86425 | 1.494 |
| C68H127NO23   | 1 | [M-H]-     | 1324.87750 | 1325.87990 | 3.679 |
| C68H125NO21   | 3 | [M-2H+K]-  | 1328.81900 | 1291.87442 | 3.022 |
| C67H124N2O21  | 5 | [M-2H+K]-  | 1329.81470 | 1292.86967 | 2.681 |
| C67H124N2O21  | 5 | [M-2H+K]-  | 1329.81640 | 1292.86967 | 1.402 |
| C70H134O17P2  | 3 | [M-2H+Na]- | 1329.88060 | 1308.90963 | 2.330 |
| C64H117NO27   | 2 | [M-H]-     | 1330.77760 | 1331.78131 | 2.678 |
| C68H127NO21   | 2 | [M-2H+K]-  | 1330.84510 | 1293.89007 | 4.835 |
| C76H142O15    | 3 | [M-2H+K]-  | 1331.98090 | 1295.03488 | 1.935 |
| C68H124N2O23  | 1 | [M-H]-     | 1335.85790 | 1336.85950 | 4.248 |
| C68H126N2O23  | 3 | [M-H]-     | 1337.86300 | 1338.87515 | 3.644 |
| C65H118N2O26  | 1 | [M-H]-     | 1341.78380 | 1342.79729 | 4.636 |
| C70H134O17P2  | 3 | [M-2H+K]-  | 1345.85280 | 1308.90963 | 4.036 |
| C70H134O17P2  | 3 | [M-2H+K]-  | 1345.86460 | 1308.90963 | 4.732 |
| C68H129N2O20P | 1 | [M-2H+Na]- | 1345.86460 | 1324.88764 | 2.153 |
| C68H127NO22   | 1 | [M-2H+K]-  | 1346.83990 | 1309.88498 | 4.692 |
| C80H128O14    | 1 | [M-2H+K]-  | 1349.88290 | 1312.93041 | 2.880 |
| C63H114N2O26  | 1 | [M-2H+K]-  | 1351.71350 | 1314.76599 | 0.806 |
| C68H126N2O23  | 3 | [M-2H+Na]- | 1359.84670 | 1338.87515 | 1.847 |
| C68H126N2O23  | 3 | [M-2H+Na]- | 1359.85210 | 1338.87515 | 2.125 |
| C68H125NO23   | 2 | [M-2H+K]-  | 1360.81360 | 1323.86425 | 0.554 |
| C82H132O14    | 1 | [M-2H+Na]- | 1361.93660 | 1340.96171 | 0.604 |
| C64H117NO27   | 2 | [M-2H+K]-  | 1368.73660 | 1331.78131 | 4.891 |

|                |   |            |            |            |       |
|----------------|---|------------|------------|------------|-------|
| C65H117N3O27   | 1 | [M-H]-     | 1370.77360 | 1371.78745 | 4.802 |
| C82H134O14     | 3 | [M-2H+K]-  | 1379.92240 | 1342.97800 | 3.044 |
| C82H134O14     | 3 | [M-2H+K]-  | 1379.92440 | 1342.97800 | 1.594 |
| C82H134O14     | 3 | [M-2H+K]-  | 1379.93150 | 1342.97800 | 3.551 |
| C66H120N2O28   | 1 | [M-H]-     | 1387.79170 | 1388.80277 | 2.738 |
| C95H157O4P     | 2 | [M-H]-     | 1392.17190 | 1393.18195 | 1.997 |
| C66H121NO27    | 1 | [M-2H+K]-  | 1396.75900 | 1359.81261 | 1.579 |
| C66H121NO28    | 2 | [M-2H+Na]- | 1396.77520 | 1375.80752 | 4.573 |
| C66H121NO28    | 2 | [M-2H+Na]- | 1396.77670 | 1375.80752 | 3.499 |
| C69H126N2O26   | 1 | [M-H]-     | 1397.84730 | 1398.85989 | 3.806 |
| C68H124N2O27   | 1 | [M-H]-     | 1399.82540 | 1400.83916 | 4.633 |
| C68H125NO28    | 1 | [M-H]-     | 1402.83410 | 1403.83882 | 1.817 |
| C68H130N2O23P2 | 1 | [M-H]-     | 1403.84640 | 1404.85397 | 0.214 |
| C70H130N2O23   | 1 | [M-2H+K]-  | 1403.85760 | 1366.90645 | 1.820 |
| C77H146O17P2   | 2 | [M-H]-     | 1403.99440 | 1405.00353 | 1.327 |
| C77H146O17P2   | 2 | [M-H]-     | 1403.99870 | 1405.00353 | 1.736 |
| C72H133N3O23   | 4 | [M-H]-     | 1406.92450 | 1407.93299 | 0.870 |
| C72H133N3O23   | 4 | [M-H]-     | 1406.92730 | 1407.93299 | 1.120 |
| C68H124N2O28   | 1 | [M-H]-     | 1415.82930 | 1416.83407 | 1.766 |
| C70H129N3O23   | 2 | [M-2H+K]-  | 1416.84640 | 1379.90169 | 2.748 |
| C70H129N3O23   | 2 | [M-2H+K]-  | 1416.85160 | 1379.90169 | 0.922 |
| C69H125N3O27   | 1 | [M-H]-     | 1426.83860 | 1427.85005 | 2.932 |
| C72H131N3O23   | 2 | [M-2H+Na]- | 1426.89550 | 1405.91734 | 2.867 |
| C72H133N3O23   | 4 | [M-2H+Na]- | 1428.90670 | 1407.93299 | 0.252 |
| C95H157O4P     | 2 | [M-2H+K]-  | 1430.12820 | 1393.18195 | 1.643 |
| C71H129N3O26   | 3 | [M-H]-     | 1438.87720 | 1439.88644 | 1.368 |
| C71H129N3O26   | 3 | [M-H]-     | 1438.88570 | 1439.88644 | 4.540 |
| C72H131NO27    | 2 | [M-H]-     | 1440.87960 | 1441.89086 | 2.766 |
| C72H131N3O23   | 2 | [M-2H+K]-  | 1442.86940 | 1405.91734 | 2.396 |
| C72H133NO27    | 1 | [M-H]-     | 1442.90380 | 1443.90651 | 3.163 |
| C72H133N3O23   | 4 | [M-2H+K]-  | 1444.88570 | 1407.93299 | 2.842 |
| C71H128N2O26   | 2 | [M-2H+Na]- | 1445.85550 | 1424.87554 | 4.076 |
| C69H125N3O26   | 1 | [M-2H+K]-  | 1448.79950 | 1411.85514 | 2.925 |
| C70H128N2O27   | 2 | [M-2H+Na]- | 1449.84390 | 1428.87046 | 0.428 |
| C73H132N2O26   | 4 | [M-H]-     | 1451.90450 | 1452.90684 | 3.396 |
| C72H133NO28    | 1 | [M-H]-     | 1458.89810 | 1459.90142 | 2.707 |
| C71H129N3O26   | 3 | [M-2H+Na]- | 1460.86150 | 1439.88644 | 0.682 |
| C71H128N2O26   | 2 | [M-2H+K]-  | 1461.81740 | 1424.87554 | 4.611 |
| C71H130N2O26   | 1 | [M-2H+K]-  | 1463.83950 | 1426.89119 | 0.198 |
| C70H128N2O27   | 2 | [M-2H+K]-  | 1465.82400 | 1428.87046 | 3.374 |
| C70H128N2O28   | 3 | [M-2H+Na]- | 1465.83810 | 1444.86537 | 0.911 |
| C70H129NO28    | 2 | [M-2H+K]-  | 1468.81240 | 1431.87012 | 4.303 |
| C70H129NO28    | 2 | [M-2H+K]-  | 1468.81620 | 1431.87012 | 1.716 |
| C74H135NO27    | 3 | [M-H]-     | 1468.91440 | 1469.92216 | 0.331 |
| C73H132N2O26   | 4 | [M-2H+Na]- | 1473.87430 | 1452.90684 | 4.482 |
| C73H132N2O26   | 4 | [M-2H+Na]- | 1473.88530 | 1452.90684 | 2.981 |
| C69H124N2O31   | 3 | [M-H]-     | 1475.80420 | 1476.81882 | 4.977 |
| C69H124N2O31   | 3 | [M-H]-     | 1475.80640 | 1476.81882 | 3.486 |
| C72H132N2O27   | 3 | [M-2H+Na]- | 1477.88280 | 1456.90176 | 4.722 |

|              |   |            |            |            |       |
|--------------|---|------------|------------|------------|-------|
| C72H131NO27  | 2 | [M-2H+K]-  | 1478.84190 | 1441.89086 | 1.653 |
| C70H127N3O28 | 1 | [M-2H+Na]- | 1478.84190 | 1457.86062 | 4.880 |
| C70H128N2O28 | 3 | [M-2H+K]-  | 1481.81290 | 1444.86537 | 0.722 |
| C70H128N2O28 | 3 | [M-2H+K]-  | 1481.81860 | 1444.86537 | 3.125 |
| C74H134N2O27 | 3 | [M-H]-     | 1481.90950 | 1482.91741 | 0.429 |
| C73H133N3O27 | 4 | [M-H]-     | 1482.91140 | 1483.91265 | 4.057 |
| C73H133N3O27 | 4 | [M-H]-     | 1482.91190 | 1483.91265 | 4.394 |
| C73H133N3O26 | 1 | [M-2H+Na]- | 1488.89530 | 1467.91774 | 2.347 |
| C73H132N2O26 | 4 | [M-2H+K]-  | 1489.85370 | 1452.90684 | 1.168 |
| C74H135NO27  | 3 | [M-2H+Na]- | 1490.89300 | 1469.92216 | 2.161 |
| C74H135NO27  | 3 | [M-2H+Na]- | 1490.89460 | 1469.92216 | 1.088 |
| C73H134N2O26 | 2 | [M-2H+K]-  | 1491.86900 | 1454.92249 | 1.401 |
| C73H134N2O26 | 2 | [M-2H+K]-  | 1491.87090 | 1454.92249 | 0.127 |
| C71H129N3O27 | 1 | [M-2H+K]-  | 1492.83030 | 1455.88135 | 0.232 |
| C75H135N3O26 | 2 | [M-H]-     | 1492.92570 | 1493.93339 | 0.281 |
| C72H132N2O27 | 3 | [M-2H+K]-  | 1493.85130 | 1456.90176 | 0.633 |
| C72H132N2O27 | 3 | [M-2H+K]-  | 1493.85460 | 1456.90176 | 2.842 |
| C69H124N2O31 | 3 | [M-2H+Na]- | 1497.79430 | 1476.81882 | 0.947 |
| C81H142O19P2 | 2 | [M-2H+Na]- | 1501.93570 | 1480.96206 | 0.286 |
| C81H142O19P2 | 2 | [M-2H+Na]- | 1501.94330 | 1480.96206 | 4.775 |
| C74H135NO28  | 2 | [M-2H+Na]- | 1506.88530 | 1485.91707 | 3.874 |
| C74H135NO28  | 2 | [M-2H+Na]- | 1506.89790 | 1485.91707 | 4.488 |
| C70H125N3O29 | 1 | [M-2H+K]-  | 1508.78100 | 1471.83988 | 4.960 |
| C74H137NO28  | 1 | [M-2H+Na]- | 1508.90700 | 1487.93272 | 0.141 |
| C75H135N3O27 | 2 | [M-H]-     | 1508.92230 | 1509.92830 | 0.839 |
| C76H140N2O27 | 1 | [M-H]-     | 1511.95620 | 1512.96436 | 0.585 |
| C74H135N3O28 | 2 | [M-H]-     | 1512.91120 | 1513.92322 | 3.139 |
| C71H127N3O31 | 2 | [M-H]-     | 1516.84090 | 1517.84536 | 1.851 |
| C74H134N2O27 | 3 | [M-2H+K]-  | 1519.86630 | 1482.91741 | 0.194 |
| C74H134N2O27 | 3 | [M-2H+K]-  | 1519.86850 | 1482.91741 | 1.642 |
| C74H134N2O28 | 3 | [M-2H+Na]- | 1519.88350 | 1498.91232 | 1.899 |
| C74H134N2O28 | 3 | [M-2H+Na]- | 1519.89170 | 1498.91232 | 3.496 |
| C73H133N3O27 | 4 | [M-2H+K]-  | 1520.85810 | 1483.91265 | 2.074 |
| C73H133N3O27 | 4 | [M-2H+K]-  | 1520.86010 | 1483.91265 | 0.759 |
| C74H136N2O27 | 1 | [M-2H+K]-  | 1521.88000 | 1484.93306 | 1.087 |
| C70H127NO33  | 2 | [M-2H+Na]- | 1530.80600 | 1509.82905 | 1.887 |
| C75H135N3O26 | 2 | [M-2H+K]-  | 1530.88610 | 1493.93339 | 2.685 |
| C75H135N3O27 | 2 | [M-2H+Na]- | 1530.90000 | 1509.92830 | 1.548 |
| C74H133N3O27 | 1 | [M-2H+K]-  | 1532.86150 | 1495.91265 | 0.160 |
| C75H137N3O27 | 2 | [M-2H+Na]- | 1532.91300 | 1511.94395 | 3.275 |
| C75H137N3O27 | 2 | [M-2H+Na]- | 1532.92090 | 1511.94395 | 1.879 |
| C81H142O21P2 | 1 | [M-2H+Na]- | 1533.92160 | 1512.95189 | 2.842 |
| C74H134N2O28 | 3 | [M-2H+K]-  | 1535.86660 | 1498.91232 | 3.698 |
| C72H131NO33  | 1 | [M-H]-     | 1536.85760 | 1537.86035 | 2.944 |
| C71H127N3O31 | 2 | [M-2H+Na]- | 1538.82050 | 1517.84536 | 0.696 |
| C76H139N3O28 | 2 | [M-H]-     | 1540.94150 | 1541.95452 | 3.731 |
| C76H139N3O28 | 2 | [M-H]-     | 1540.94400 | 1541.95452 | 2.108 |
| C70H127NO33  | 2 | [M-2H+K]-  | 1546.77700 | 1509.82905 | 0.418 |
| C72H130N2O33 | 1 | [M-H]-     | 1549.84100 | 1550.85560 | 4.726 |

|                |   |            |            |            |       |
|----------------|---|------------|------------|------------|-------|
| C76H140N2O28   | 2 | [M-2H+Na]- | 1549.93160 | 1528.95927 | 1.120 |
| C74H135N3O28   | 2 | [M-2H+K]-  | 1550.87330 | 1513.92322 | 0.955 |
| C76H135N3O29   | 4 | [M-H]-     | 1552.90390 | 1553.91813 | 4.484 |
| C76H135N3O29   | 4 | [M-H]-     | 1552.91430 | 1553.91813 | 2.213 |
| C76H137N3O29   | 4 | [M-H]-     | 1554.92840 | 1555.93378 | 1.213 |
| C76H137N3O29   | 4 | [M-H]-     | 1554.93180 | 1555.93378 | 3.400 |
| C78H148N2O24P2 | 4 | [M-H]-     | 1557.98290 | 1558.98974 | 0.279 |
| C74H134N2O32   | 3 | [M-H]-     | 1561.87990 | 1562.89198 | 3.080 |
| C74H134N2O32   | 3 | [M-H]-     | 1561.88840 | 1562.89198 | 2.363 |
| C76H138N2O28   | 1 | [M-2H+K]-  | 1563.89690 | 1526.94362 | 2.993 |
| C74H133N3O29   | 1 | [M-2H+K]-  | 1564.84480 | 1527.90248 | 4.016 |
| C76H140N2O28   | 2 | [M-2H+K]-  | 1565.90280 | 1528.95927 | 3.238 |
| C78H141N3O28   | 3 | [M-H]-     | 1566.95510 | 1567.97017 | 4.977 |
| C78H143N3O28   | 1 | [M-H]-     | 1568.97450 | 1569.98582 | 2.581 |
| C76H138N2O31   | 2 | [M-H]-     | 1573.91780 | 1574.92837 | 2.093 |
| C74H133N3O32   | 4 | [M-H]-     | 1574.87760 | 1575.88723 | 1.498 |
| C76H137N3O28   | 1 | [M-2H+K]-  | 1576.88830 | 1539.93887 | 0.527 |
| C74H134N2O33   | 2 | [M-H]-     | 1577.87640 | 1578.88690 | 2.044 |
| C74H134N2O33   | 2 | [M-H]-     | 1577.88070 | 1578.88690 | 0.681 |
| C78H148N2O24P2 | 4 | [M-2H+Na]- | 1579.96900 | 1558.98974 | 3.291 |
| C78H139N3O29   | 5 | [M-H]-     | 1580.93890 | 1581.94943 | 2.065 |
| C78H139N3O29   | 5 | [M-H]-     | 1580.94060 | 1581.94943 | 0.989 |
| C78H139N3O29   | 5 | [M-H]-     | 1580.94650 | 1581.94943 | 2.743 |
| C78H139N3O29   | 5 | [M-H]-     | 1580.94920 | 1581.94943 | 4.451 |
| C75H136N2O31   | 2 | [M-2H+Na]- | 1581.89250 | 1560.91272 | 3.615 |
| C73H131N3O31   | 1 | [M-2H+K]-  | 1582.82910 | 1545.87666 | 2.424 |
| C73H131N3O32   | 2 | [M-2H+Na]- | 1582.84810 | 1561.87158 | 1.551 |
| C78H141N3O29   | 3 | [M-H]-     | 1582.95200 | 1583.96508 | 3.673 |
| C78H141N3O29   | 3 | [M-H]-     | 1582.96300 | 1583.96508 | 3.276 |
| C74H134N2O31   | 2 | [M-2H+K]-  | 1583.84630 | 1546.89707 | 0.401 |
| C77H138N2O31   | 3 | [M-H]-     | 1585.91650 | 1586.92837 | 2.897 |
| C78H141N3O28   | 3 | [M-2H+Na]- | 1588.94780 | 1567.97017 | 2.244 |
| C76H138N2O32   | 5 | [M-H]-     | 1589.91990 | 1590.92328 | 2.447 |
| C76H138N2O32   | 5 | [M-H]-     | 1589.92090 | 1590.92328 | 3.076 |
| C76H138N2O32   | 5 | [M-H]-     | 1589.92340 | 1590.92328 | 4.648 |
| C89H166O17P2   | 1 | [M-2H+Na]- | 1590.13430 | 1569.16003 | 0.126 |
| C74H133N3O33   | 4 | [M-H]-     | 1590.86720 | 1591.88214 | 4.824 |
| C76H135N3O29   | 4 | [M-2H+K]-  | 1590.86720 | 1553.91813 | 0.293 |
| C74H133N3O33   | 4 | [M-H]-     | 1590.86880 | 1591.88214 | 3.818 |
| C76H135N3O29   | 4 | [M-2H+K]-  | 1590.86880 | 1553.91813 | 1.299 |
| C76H137N3O29   | 4 | [M-2H+K]-  | 1592.88420 | 1555.93378 | 1.140 |
| C76H137N3O29   | 4 | [M-2H+K]-  | 1592.88910 | 1555.93378 | 4.216 |
| C75H135N3O31   | 3 | [M-2H+Na]- | 1594.88100 | 1573.90796 | 0.646 |
| C76H138N2O31   | 2 | [M-2H+Na]- | 1595.89840 | 1574.92837 | 2.526 |
| C78H148N2O24P2 | 4 | [M-2H+K]-  | 1595.93090 | 1558.98974 | 4.659 |
| C78H148N2O24P2 | 4 | [M-2H+K]-  | 1595.93480 | 1558.98974 | 2.215 |
| C74H133N3O32   | 4 | [M-2H+Na]- | 1596.85690 | 1575.88723 | 2.752 |
| C75H136N2O31   | 2 | [M-2H+K]-  | 1597.86010 | 1560.91272 | 0.760 |
| C73H131N3O32   | 2 | [M-2H+K]-  | 1598.82110 | 1561.87158 | 0.576 |



|              |   |            |            |            |       |
|--------------|---|------------|------------|------------|-------|
| C74H134N2O32 | 3 | [M-2H+K]-  | 1599.84260 | 1562.89198 | 1.263 |
| C77H139N3O31 | 2 | [M-H]-     | 1600.92970 | 1601.93926 | 1.433 |
| C74H135NO33  | 2 | [M-2H+K]-  | 1602.84370 | 1565.89165 | 2.155 |
| C74H135NO33  | 2 | [M-2H+K]-  | 1602.84520 | 1565.89165 | 3.091 |
| C76H137N3O32 | 2 | [M-H]-     | 1602.90870 | 1603.91853 | 1.596 |
| C78H141N3O28 | 3 | [M-2H+K]-  | 1604.91680 | 1567.97017 | 1.227 |
| C78H141N3O29 | 3 | [M-2H+Na]- | 1604.93780 | 1583.96508 | 0.841 |
| C76H138N2O33 | 5 | [M-H]-     | 1605.90810 | 1606.91820 | 1.759 |
| C77H138N2O31 | 3 | [M-2H+Na]- | 1607.89550 | 1586.92837 | 4.311 |
| C75H135N3O31 | 3 | [M-2H+K]-  | 1610.85100 | 1573.90796 | 3.454 |
| C75H135N3O31 | 3 | [M-2H+K]-  | 1610.85720 | 1573.90796 | 0.395 |
| C75H135N3O32 | 4 | [M-2H+Na]- | 1610.87350 | 1589.90288 | 2.139 |
| C75H135N3O32 | 4 | [M-2H+Na]- | 1610.87840 | 1589.90288 | 0.903 |
| C76H138N2O32 | 5 | [M-2H+Na]- | 1611.89600 | 1590.92328 | 0.835 |
| C74H133N3O32 | 4 | [M-2H+K]-  | 1612.82970 | 1575.88723 | 3.800 |
| C74H133N3O32 | 4 | [M-2H+K]-  | 1612.83450 | 1575.88723 | 0.824 |
| C74H133N3O33 | 4 | [M-2H+Na]- | 1612.86100 | 1591.88214 | 2.970 |
| C77H139N3O32 | 2 | [M-H]-     | 1616.92000 | 1617.93418 | 4.273 |
| C76H137N3O33 | 5 | [M-H]-     | 1618.89920 | 1619.91344 | 4.308 |
| C78H139N3O29 | 5 | [M-2H+K]-  | 1618.89920 | 1581.94943 | 0.720 |
| C76H137N3O33 | 5 | [M-H]-     | 1618.90970 | 1619.91344 | 2.178 |
| C78H141NO33  | 2 | [M-H]-     | 1618.92840 | 1619.93860 | 1.807 |
| C78H141NO33  | 2 | [M-H]-     | 1618.93270 | 1619.93860 | 0.849 |
| C78H143NO33  | 1 | [M-H]-     | 1620.94030 | 1621.95425 | 4.119 |
| C77H138N2O31 | 3 | [M-2H+K]-  | 1623.86930 | 1586.92837 | 4.720 |
| C77H140N2O31 | 2 | [M-2H+K]-  | 1625.88810 | 1588.94402 | 2.777 |
| C75H135N3O32 | 4 | [M-2H+K]-  | 1626.84810 | 1589.90288 | 2.077 |
| C75H135N3O32 | 4 | [M-2H+K]-  | 1626.84880 | 1589.90288 | 1.647 |
| C79H141N3O31 | 2 | [M-H]-     | 1626.94240 | 1627.95491 | 3.223 |
| C76H138N2O32 | 5 | [M-2H+K]-  | 1627.86760 | 1590.92328 | 2.629 |
| C76H138N2O33 | 5 | [M-2H+Na]- | 1627.89250 | 1606.91820 | 0.147 |
| C80H144N2O31 | 2 | [M-H]-     | 1627.96120 | 1628.97532 | 4.205 |
| C79H143N3O31 | 5 | [M-H]-     | 1628.95680 | 1629.97056 | 3.987 |
| C79H143N3O31 | 5 | [M-H]-     | 1628.96100 | 1629.97056 | 1.408 |
| C80H146N2O31 | 1 | [M-H]-     | 1629.97760 | 1630.99097 | 3.739 |
| C76H139NO33  | 1 | [M-2H+K]-  | 1630.87690 | 1593.92295 | 3.283 |
| C76H136N4O33 | 4 | [M-H]-     | 1631.89530 | 1632.90869 | 3.751 |
| C76H136N4O33 | 4 | [M-H]-     | 1631.90410 | 1632.90869 | 1.641 |
| C78H142N2O33 | 2 | [M-H]-     | 1633.95020 | 1634.94950 | 4.881 |
| C79H144N2O31 | 1 | [M-2H+Na]- | 1637.94920 | 1616.97532 | 0.111 |
| C77H139N3O31 | 2 | [M-2H+K]-  | 1638.89460 | 1601.93926 | 4.110 |
| C77H139N3O32 | 2 | [M-2H+Na]- | 1638.91490 | 1617.93418 | 4.061 |
| C78H142N2O32 | 2 | [M-2H+Na]- | 1639.92880 | 1618.95458 | 0.094 |
| C76H137N3O32 | 2 | [M-2H+K]-  | 1640.86400 | 1603.91853 | 1.907 |
| C76H137N3O33 | 5 | [M-2H+Na]- | 1640.88090 | 1619.91344 | 4.028 |
| C76H137N3O33 | 5 | [M-2H+Na]- | 1640.88310 | 1619.91344 | 2.688 |
| C79H141N3O32 | 2 | [M-H]-     | 1642.94680 | 1643.94983 | 2.581 |
| C76H138N2O33 | 5 | [M-2H+K]-  | 1643.86240 | 1606.91820 | 2.674 |
| C76H138N2O33 | 5 | [M-2H+K]-  | 1643.86400 | 1606.91820 | 1.700 |

|              |   |            |            |            |       |
|--------------|---|------------|------------|------------|-------|
| C76H138N2O33 | 5 | [M-2H+K]-  | 1643.87320 | 1606.91820 | 3.896 |
| C79H143N3O32 | 3 | [M-H]-     | 1644.96110 | 1645.96548 | 1.757 |
| C79H143N3O32 | 3 | [M-H]-     | 1644.96230 | 1645.96548 | 2.487 |
| C80H145N3O33 | 4 | [M-H]-     | 1646.96800 | 1647.96990 | 3.263 |
| C79H141N3O31 | 2 | [M-2H+Na]- | 1648.92760 | 1627.95491 | 0.837 |
| C80H144N2O31 | 2 | [M-2H+Na]- | 1649.95060 | 1628.97532 | 0.739 |
| C79H143N3O31 | 5 | [M-2H+Na]- | 1650.94370 | 1629.97056 | 0.563 |
| C76H136N4O33 | 4 | [M-2H+Na]- | 1653.88600 | 1632.90869 | 1.960 |
| C81H145N3O31 | 2 | [M-H]-     | 1654.97480 | 1655.98621 | 2.504 |
| C81H145N3O31 | 2 | [M-H]-     | 1654.98330 | 1655.98621 | 2.632 |
| C78H142N2O32 | 2 | [M-2H+K]-  | 1655.89770 | 1618.95458 | 3.309 |
| C76H137N3O33 | 5 | [M-2H+K]-  | 1656.86120 | 1619.91344 | 0.509 |
| C81H147N3O31 | 3 | [M-H]-     | 1656.99410 | 1658.00186 | 0.298 |
| C81H147N3O31 | 3 | [M-H]-     | 1656.99780 | 1658.00186 | 1.935 |
| C80H145N3O32 | 2 | [M-H]-     | 1658.97850 | 1659.98113 | 2.798 |
| C75H134N2O35 | 1 | [M-2H+K]-  | 1659.81870 | 1622.87673 | 3.991 |
| C78H140N4O33 | 3 | [M-H]-     | 1659.92790 | 1660.93999 | 2.905 |
| C78H140N4O33 | 3 | [M-H]-     | 1659.92800 | 1660.93999 | 2.845 |
| C80H144N2O33 | 2 | [M-H]-     | 1659.96310 | 1660.96515 | 3.148 |
| C80H144N2O33 | 2 | [M-H]-     | 1659.96320 | 1660.96515 | 3.208 |
| C77H137N3O35 | 1 | [M-H]-     | 1662.89690 | 1663.90327 | 0.539 |
| C79H141N3O32 | 2 | [M-2H+Na]- | 1664.92570 | 1643.94983 | 1.084 |
| C80H144N2O32 | 2 | [M-2H+Na]- | 1665.94100 | 1644.97023 | 1.978 |
| C79H143N3O31 | 5 | [M-2H+K]-  | 1666.92550 | 1629.97056 | 3.801 |
| C79H143N3O31 | 5 | [M-2H+K]-  | 1666.92630 | 1629.97056 | 4.281 |
| C76H134N4O34 | 2 | [M-2H+Na]- | 1667.86380 | 1646.88796 | 1.065 |
| C80H146N2O32 | 2 | [M-2H+Na]- | 1667.96700 | 1646.98588 | 4.229 |
| C78H141N3O33 | 2 | [M-2H+Na]- | 1668.91810 | 1647.94474 | 0.425 |
| C80H145N3O33 | 4 | [M-2H+Na]- | 1668.93630 | 1647.96990 | 4.591 |
| C76H136N4O33 | 4 | [M-2H+K]-  | 1669.85060 | 1632.90869 | 4.008 |
| C80H147N3O33 | 2 | [M-2H+Na]- | 1670.95890 | 1649.98555 | 0.426 |
| C81H145N3O32 | 4 | [M-H]-     | 1670.97690 | 1671.98113 | 1.820 |
| C81H145N3O32 | 4 | [M-H]-     | 1670.98030 | 1671.98113 | 3.855 |
| C78H142N2O33 | 2 | [M-2H+K]-  | 1671.89680 | 1634.94950 | 0.775 |
| C81H147N3O32 | 6 | [M-H]-     | 1672.98460 | 1673.99678 | 2.934 |
| C81H147N3O32 | 6 | [M-H]-     | 1672.98680 | 1673.99678 | 1.619 |
| C81H147N3O32 | 6 | [M-H]-     | 1672.98720 | 1673.99678 | 1.380 |
| C82H150N2O32 | 3 | [M-H]-     | 1674.00420 | 1675.01718 | 3.411 |
| C80H145N3O33 | 4 | [M-H]-     | 1674.97210 | 1675.97604 | 1.986 |
| C80H145N3O33 | 4 | [M-H]-     | 1674.97470 | 1675.97604 | 3.538 |
| C82H148N2O31 | 3 | [M-2H+Na]- | 1677.97670 | 1657.00662 | 2.372 |
| C82H148N2O31 | 3 | [M-2H+Na]- | 1677.98390 | 1657.00662 | 1.918 |
| C81H147N3O31 | 3 | [M-2H+Na]- | 1678.97510 | 1658.00186 | 0.494 |
| C78H140N2O36 | 3 | [M-H]-     | 1679.90460 | 1680.91859 | 4.000 |
| C78H140N2O36 | 3 | [M-H]-     | 1679.90840 | 1680.91859 | 1.738 |
| C82H150N2O31 | 1 | [M-2H+Na]- | 1680.00230 | 1659.02227 | 3.553 |
| C80H145N3O32 | 2 | [M-2H+Na]- | 1680.95630 | 1659.98113 | 0.657 |
| C80H144N2O32 | 2 | [M-2H+K]-  | 1681.92500 | 1644.97023 | 3.668 |
| C79H143N3O32 | 3 | [M-2H+K]-  | 1682.91840 | 1645.96548 | 2.568 |

|              |   |            |            |            |       |
|--------------|---|------------|------------|------------|-------|
| C76H134N4O34 | 2 | [M-2H+K]-  | 1683.82940 | 1646.88796 | 4.250 |
| C80H146N2O32 | 2 | [M-2H+K]-  | 1683.93080 | 1646.98588 | 2.185 |
| C80H146N2O33 | 2 | [M-2H+Na]- | 1683.96290 | 1662.98080 | 4.774 |
| C78H141N3O33 | 2 | [M-2H+K]-  | 1684.89420 | 1647.94474 | 0.508 |
| C80H145N033  | 4 | [M-2H+K]-  | 1684.91570 | 1647.96990 | 1.659 |
| C80H145N033  | 4 | [M-2H+K]-  | 1684.92660 | 1647.96990 | 4.810 |
| C82H147N3O32 | 4 | [M-H]-     | 1684.98240 | 1685.99678 | 4.219 |
| C82H147N3O32 | 4 | [M-H]-     | 1684.98720 | 1685.99678 | 1.370 |
| C80H147N033  | 2 | [M-2H+K]-  | 1686.93100 | 1649.98555 | 1.865 |
| C82H148N2O33 | 6 | [M-H]-     | 1687.98160 | 1688.99645 | 4.488 |
| C82H148N2O33 | 6 | [M-H]-     | 1687.98240 | 1688.99645 | 4.014 |
| C82H148N2O33 | 6 | [M-H]-     | 1687.98950 | 1688.99645 | 0.193 |
| C95H178O17P2 | 2 | [M-2H+K]-  | 1690.19870 | 1653.25393 | 2.268 |
| C95H178O17P2 | 2 | [M-2H+K]-  | 1690.20430 | 1653.25393 | 1.045 |
| C76H137N038  | 1 | [M-2H+Na]- | 1692.85170 | 1671.88187 | 2.503 |
| C81H145N3O32 | 4 | [M-2H+Na]- | 1692.95080 | 1671.98113 | 2.596 |
| C81H145N3O32 | 4 | [M-2H+Na]- | 1692.96240 | 1671.98113 | 4.256 |
| C82H148N2O31 | 3 | [M-2H+K]-  | 1693.95720 | 1657.00662 | 1.172 |
| C82H148N2O32 | 3 | [M-2H+Na]- | 1693.96950 | 1673.00153 | 3.599 |
| C82H148N2O32 | 3 | [M-2H+Na]- | 1693.96980 | 1673.00153 | 3.422 |
| C82H148N2O32 | 3 | [M-2H+Na]- | 1693.97080 | 1673.00153 | 2.831 |
| C81H147N3O32 | 6 | [M-2H+Na]- | 1694.96870 | 1673.99678 | 1.266 |
| C81H147N3O32 | 6 | [M-2H+Na]- | 1694.97420 | 1673.99678 | 1.979 |
| C80H145N3O33 | 4 | [M-2H+Na]- | 1696.94470 | 1675.97604 | 3.188 |
| C78H140N4O33 | 3 | [M-2H+K]-  | 1697.88570 | 1660.93999 | 1.703 |
| C99H202O13P2 | 2 | [M-2H+K]-  | 1698.40230 | 1661.46207 | 4.930 |
| C99H202O13P2 | 2 | [M-2H+K]-  | 1698.41630 | 1661.46207 | 3.313 |
| C78H141N038  | 3 | [M-H]-     | 1698.90140 | 1699.91317 | 2.649 |
| C80H146N2O33 | 2 | [M-2H+K]-  | 1699.93770 | 1662.98080 | 4.885 |
| C77H137N3O36 | 2 | [M-2H+Na]- | 1700.87400 | 1679.89819 | 1.026 |
| C77H137N3O36 | 2 | [M-2H+Na]- | 1700.87820 | 1679.89819 | 3.495 |
| C82H147N3O33 | 2 | [M-H]-     | 1700.99210 | 1701.99169 | 4.513 |
| C78H140N2O36 | 3 | [M-2H+Na]- | 1701.89020 | 1680.91859 | 1.443 |
| C80H142N4O34 | 4 | [M-H]-     | 1701.94440 | 1702.95056 | 0.654 |
| C80H142N4O34 | 4 | [M-H]-     | 1701.94880 | 1702.95056 | 3.239 |
| C82H149N3O33 | 3 | [M-H]-     | 1702.99410 | 1704.00734 | 3.508 |
| C81H146N2O35 | 6 | [M-H]-     | 1705.95780 | 1706.97063 | 3.256 |
| C81H146N2O35 | 6 | [M-H]-     | 1705.96030 | 1706.97063 | 1.791 |
| C82H147N3O32 | 4 | [M-2H+Na]- | 1706.97430 | 1685.99678 | 2.024 |
| C82H149N3O32 | 3 | [M-2H+Na]- | 1708.99180 | 1688.01243 | 3.104 |
| C82H149N3O32 | 3 | [M-2H+Na]- | 1708.99270 | 1688.01243 | 3.631 |
| C82H148N2O33 | 6 | [M-2H+Na]- | 1709.96670 | 1688.99645 | 2.229 |
| C82H148N2O33 | 6 | [M-2H+Na]- | 1709.97880 | 1688.99645 | 4.847 |
| C81H147N3O32 | 6 | [M-2H+K]-  | 1710.94840 | 1673.99678 | 1.766 |
| C82H150N2O32 | 3 | [M-2H+K]-  | 1711.95890 | 1675.01718 | 4.019 |
| C82H150N2O32 | 3 | [M-2H+K]-  | 1711.96480 | 1675.01718 | 0.572 |
| C80H145N3O33 | 4 | [M-2H+K]-  | 1712.92450 | 1675.97604 | 0.084 |
| C84H151N3O32 | 1 | [M-H]-     | 1713.01650 | 1714.02808 | 2.515 |
| C79H142N2O35 | 1 | [M-2H+K]-  | 1715.89050 | 1678.93933 | 1.501 |

|              |   |            |            |            |       |
|--------------|---|------------|------------|------------|-------|
| C78H140N2O37 | 2 | [M-2H+Na]- | 1717.87960 | 1696.91351 | 4.640 |
| C78H140N2O37 | 2 | [M-2H+Na]- | 1717.89510 | 1696.91351 | 4.383 |
| C80H143N3O36 | 5 | [M-H]-     | 1720.94600 | 1721.94514 | 4.725 |
| C82H147N3O32 | 4 | [M-2H+K]-  | 1722.94100 | 1685.99678 | 2.542 |
| C82H147N3O33 | 2 | [M-2H+Na]- | 1722.96850 | 1701.99169 | 1.590 |
| C80H142N4O34 | 4 | [M-2H+Na]- | 1723.92250 | 1702.95056 | 1.231 |
| C80H144N2O37 | 5 | [M-H]-     | 1723.94050 | 1724.94481 | 1.720 |
| C82H149N3O32 | 3 | [M-2H+K]-  | 1724.95920 | 1688.01243 | 1.060 |
| C82H149N3O33 | 3 | [M-2H+Na]- | 1724.98460 | 1704.00734 | 1.849 |
| C82H149N3O33 | 3 | [M-2H+Na]- | 1724.98740 | 1704.00734 | 3.473 |
| C78H138N2O39 | 2 | [M-H]-     | 1725.88510 | 1726.88769 | 2.715 |
| C80H144N4O33 | 2 | [M-2H+K]-  | 1725.91460 | 1688.97129 | 3.066 |
| C80H144N4O33 | 2 | [M-2H+K]-  | 1725.92590 | 1688.97129 | 3.481 |
| C82H148N2O33 | 6 | [M-2H+K]-  | 1725.94630 | 1688.99645 | 0.727 |
| C82H148N2O33 | 6 | [M-2H+K]-  | 1725.95330 | 1688.99645 | 4.783 |
| C80H145NO38  | 3 | [M-H]-     | 1726.94130 | 1727.94447 | 2.374 |
| C81H146N2O35 | 6 | [M-2H+Na]- | 1727.93990 | 1706.97063 | 2.773 |
| C81H146N2O35 | 6 | [M-2H+Na]- | 1727.94760 | 1706.97063 | 1.684 |
| C82H150N2O33 | 3 | [M-2H+K]-  | 1727.96130 | 1691.01210 | 0.350 |
| C82H150N2O33 | 3 | [M-2H+K]-  | 1727.96870 | 1691.01210 | 4.633 |
| C82H150N2O33 | 3 | [M-2H+K]-  | 1727.96920 | 1691.01210 | 4.922 |
| C84H151N3O33 | 5 | [M-H]-     | 1729.00950 | 1730.02299 | 3.600 |
| C84H151N3O33 | 5 | [M-H]-     | 1729.01020 | 1730.02299 | 3.195 |
| C82H146N4O34 | 5 | [M-H]-     | 1729.96840 | 1730.98186 | 3.577 |
| C82H146N4O34 | 5 | [M-H]-     | 1729.97380 | 1730.98186 | 0.455 |
| C82H146N4O34 | 5 | [M-H]-     | 1729.97550 | 1730.98186 | 0.527 |
| C83H148N2O35 | 5 | [M-H]-     | 1731.97760 | 1732.98628 | 0.811 |
| C83H148N2O35 | 5 | [M-H]-     | 1731.98000 | 1732.98628 | 0.574 |
| C77H137N3O37 | 1 | [M-2H+K]-  | 1732.83590 | 1695.89310 | 3.349 |
| C79H138N4O37 | 3 | [M-H]-     | 1733.89270 | 1734.90400 | 2.325 |
| C79H138N4O37 | 3 | [M-H]-     | 1733.89600 | 1734.90400 | 0.422 |
| C83H150N2O35 | 3 | [M-H]-     | 1733.99350 | 1735.00193 | 0.666 |
| C83H150N2O35 | 3 | [M-H]-     | 1734.00070 | 1735.00193 | 3.486 |
| C81H145N3O36 | 3 | [M-H]-     | 1734.95270 | 1735.96079 | 0.472 |
| C81H145N3O36 | 3 | [M-H]-     | 1734.95780 | 1735.96079 | 2.468 |
| C79H140N4O37 | 3 | [M-H]-     | 1735.90680 | 1736.91965 | 3.216 |
| C78H141NO38  | 3 | [M-2H+K]-  | 1736.85530 | 1699.91317 | 3.726 |
| C78H141NO38  | 3 | [M-2H+K]-  | 1736.86220 | 1699.91317 | 0.247 |
| C84H153N3O32 | 5 | [M-2H+Na]- | 1737.01190 | 1716.04373 | 3.394 |
| C84H153N3O32 | 5 | [M-2H+Na]- | 1737.01600 | 1716.04373 | 1.033 |
| C84H153N3O32 | 5 | [M-2H+Na]- | 1737.01730 | 1716.04373 | 0.285 |
| C84H153N3O32 | 5 | [M-2H+Na]- | 1737.02570 | 1716.04373 | 4.551 |
| C80H142N4O34 | 4 | [M-2H+K]-  | 1739.90090 | 1702.95056 | 1.002 |
| C80H144N2O38 | 3 | [M-H]-     | 1739.92500 | 1740.93972 | 4.282 |
| C81H145N3O35 | 2 | [M-2H+Na]- | 1740.94240 | 1719.96587 | 1.413 |
| C84H150N4O33 | 2 | [M-H]-     | 1742.00320 | 1743.01824 | 4.462 |
| C80H143N3O36 | 5 | [M-2H+Na]- | 1742.91620 | 1721.94514 | 1.724 |
| C80H143N3O36 | 5 | [M-2H+Na]- | 1742.91930 | 1721.94514 | 0.055 |
| C81H146N2O35 | 6 | [M-2H+K]-  | 1743.91540 | 1706.97063 | 2.193 |

|              |   |            |            |            |       |
|--------------|---|------------|------------|------------|-------|
| C81H146N2O35 | 6 | [M-2H+K]-  | 1743.92520 | 1706.97063 | 3.426 |
| C81H146N2O35 | 6 | [M-2H+K]-  | 1743.92530 | 1706.97063 | 3.484 |
| C84H152N4O33 | 5 | [M-H]-     | 1744.02450 | 1745.03389 | 1.217 |
| C79H141N3O36 | 2 | [M-2H+K]-  | 1744.87730 | 1707.92949 | 0.452 |
| C79H141N3O36 | 2 | [M-2H+K]-  | 1744.88610 | 1707.92949 | 4.591 |
| C79H141N3O37 | 1 | [M-2H+Na]- | 1744.90540 | 1723.92440 | 3.972 |
| C80H144N2O36 | 1 | [M-2H+K]-  | 1745.89110 | 1708.94989 | 4.233 |
| C80H144N2O37 | 5 | [M-2H+Na]- | 1745.92010 | 1724.94481 | 0.704 |
| C80H144N2O37 | 5 | [M-2H+Na]- | 1745.92620 | 1724.94481 | 4.198 |
| C80H144N2O37 | 5 | [M-2H+Na]- | 1745.92640 | 1724.94481 | 4.312 |
| C81H144N4O36 | 4 | [M-H]-     | 1747.94720 | 1748.95604 | 0.897 |
| C81H144N4O36 | 4 | [M-H]-     | 1747.95740 | 1748.95604 | 4.938 |
| C82H147N3O36 | 1 | [M-H]-     | 1748.96110 | 1749.97644 | 4.614 |
| C78H140N2O38 | 2 | [M-2H+K]-  | 1749.85660 | 1712.90842 | 0.240 |
| C78H140N2O38 | 2 | [M-2H+K]-  | 1749.85860 | 1712.90842 | 0.903 |
| C81H145N3O37 | 6 | [M-H]-     | 1750.94700 | 1751.95570 | 0.819 |
| C81H145N3O37 | 6 | [M-H]-     | 1750.94740 | 1751.95570 | 0.591 |
| C81H145N3O37 | 6 | [M-H]-     | 1750.95410 | 1751.95570 | 3.236 |
| C84H151N3O33 | 5 | [M-2H+Na]- | 1750.99140 | 1730.02299 | 3.232 |
| C84H151N3O33 | 5 | [M-2H+Na]- | 1750.99880 | 1730.02299 | 0.994 |
| C82H146N4O34 | 5 | [M-2H+Na]- | 1751.94940 | 1730.98186 | 3.724 |
| C82H148N2O37 | 5 | [M-H]-     | 1751.96800 | 1752.97611 | 0.477 |
| C82H148N2O37 | 5 | [M-H]-     | 1751.97510 | 1752.97611 | 3.576 |
| C82H148N2O37 | 5 | [M-H]-     | 1751.97740 | 1752.97611 | 4.889 |
| C84H153N3O32 | 5 | [M-2H+K]-  | 1752.99540 | 1716.04373 | 1.752 |
| C84H153N3O33 | 3 | [M-2H+Na]- | 1753.01360 | 1732.03864 | 0.508 |
| C84H153N3O33 | 3 | [M-2H+Na]- | 1753.01770 | 1732.03864 | 2.847 |
| C80H142N2O39 | 1 | [M-H]-     | 1753.91570 | 1754.91899 | 2.272 |
| C83H148N2O35 | 5 | [M-2H+Na]- | 1753.95360 | 1732.98628 | 3.843 |
| C82H148N4O33 | 1 | [M-2H+K]-  | 1753.95360 | 1717.00259 | 1.372 |
| C83H148N2O35 | 5 | [M-2H+Na]- | 1753.96440 | 1732.98628 | 2.314 |
| C82H149NO38  | 5 | [M-H]-     | 1754.95990 | 1755.97577 | 4.902 |
| C82H149NO38  | 5 | [M-H]-     | 1754.96820 | 1755.97577 | 0.172 |
| C82H149NO38  | 5 | [M-H]-     | 1754.97690 | 1755.97577 | 4.785 |
| C79H138N4O37 | 3 | [M-2H+Na]- | 1755.87640 | 1734.90400 | 0.950 |
| C83H150N2O35 | 3 | [M-2H+Na]- | 1755.97400 | 1735.00193 | 1.134 |
| C81H145N3O35 | 2 | [M-2H+K]-  | 1756.91360 | 1719.96587 | 0.497 |
| C79H140N4O36 | 1 | [M-2H+K]-  | 1757.87620 | 1720.92474 | 1.629 |
| C84H150N4O34 | 5 | [M-H]-     | 1758.00310 | 1759.01316 | 1.586 |
| C80H143N3O36 | 5 | [M-2H+K]-  | 1758.88750 | 1721.94514 | 3.547 |
| C80H143N3O36 | 5 | [M-2H+K]-  | 1758.90060 | 1721.94514 | 3.901 |
| C80H143N3O37 | 3 | [M-2H+Na]- | 1758.91410 | 1737.94005 | 0.011 |
| C80H144N2O37 | 5 | [M-2H+K]-  | 1761.89810 | 1724.94481 | 2.665 |
| C81H142N4O37 | 5 | [M-H]-     | 1761.92300 | 1762.93530 | 2.856 |
| C81H142N4O37 | 5 | [M-H]-     | 1761.92750 | 1762.93530 | 0.302 |
| C81H142N4O37 | 5 | [M-H]-     | 1761.92820 | 1762.93530 | 0.095 |
| C85H154N2O35 | 5 | [M-H]-     | 1762.02250 | 1763.03323 | 1.961 |
| C83H149N3O36 | 4 | [M-H]-     | 1762.98320 | 1763.99209 | 0.918 |
| C83H149N3O36 | 4 | [M-H]-     | 1762.98490 | 1763.99209 | 0.046 |

|              |   |            |            |            |       |
|--------------|---|------------|------------|------------|-------|
| C78H138N2O39 | 2 | [M-2H+K]-  | 1763.83950 | 1726.88769 | 1.823 |
| C84H150N4O33 | 2 | [M-2H+Na]- | 1763.98950 | 1743.01824 | 1.592 |
| C84H152N2O36 | 2 | [M-H]-     | 1764.01180 | 1765.01249 | 3.730 |
| C80H145NO38  | 3 | [M-2H+K]-  | 1764.89110 | 1727.94447 | 1.117 |
| C80H145NO38  | 3 | [M-2H+K]-  | 1764.89440 | 1727.94447 | 0.753 |
| C82H147N3O37 | 3 | [M-H]-     | 1764.96410 | 1765.97135 | 0.009 |
| C82H147N3O37 | 3 | [M-H]-     | 1764.96440 | 1765.97135 | 0.179 |
| C84H152N4O33 | 5 | [M-2H+Na]- | 1766.00450 | 1745.03389 | 1.959 |
| C84H152N4O33 | 5 | [M-2H+Na]- | 1766.01360 | 1745.03389 | 3.194 |
| C84H151N3O33 | 5 | [M-2H+K]-  | 1766.97760 | 1730.02299 | 3.399 |
| C82H146N4O34 | 5 | [M-2H+K]-  | 1767.92660 | 1730.98186 | 2.182 |
| C82H148N2O38 | 4 | [M-H]-     | 1767.95830 | 1768.97102 | 3.083 |
| C82H148N2O38 | 4 | [M-H]-     | 1767.95860 | 1768.97102 | 2.913 |
| C82H148N2O38 | 4 | [M-H]-     | 1767.96700 | 1768.97102 | 1.838 |
| C84H153N3O33 | 3 | [M-2H+K]-  | 1768.99440 | 1732.03864 | 4.045 |
| C83H148N2O35 | 5 | [M-2H+K]-  | 1769.93250 | 1732.98628 | 1.342 |
| C81H144N4O36 | 4 | [M-2H+Na]- | 1769.93250 | 1748.95604 | 1.354 |
| C86H154N4O33 | 4 | [M-H]-     | 1770.04200 | 1771.04954 | 0.154 |
| C98H195O21PS | 3 | [M-H]-     | 1770.36100 | 1771.36493 | 1.887 |
| C86H156N4O33 | 1 | [M-H]-     | 1772.05960 | 1773.06519 | 0.946 |
| C81H145N3O36 | 3 | [M-2H+K]-  | 1772.91160 | 1735.96079 | 1.247 |
| C81H145N3O37 | 6 | [M-2H+Na]- | 1772.93630 | 1751.95570 | 3.683 |
| C85H151N3O35 | 4 | [M-H]-     | 1773.00150 | 1774.01282 | 2.287 |
| C85H151N3O35 | 4 | [M-H]-     | 1773.00270 | 1774.01282 | 1.610 |
| C85H151N3O35 | 4 | [M-H]-     | 1773.00300 | 1774.01282 | 1.440 |
| C79H140N4O37 | 3 | [M-2H+K]-  | 1773.86010 | 1736.91965 | 4.596 |
| C79H140N4O37 | 3 | [M-2H+K]-  | 1773.87340 | 1736.91965 | 2.902 |
| C82H148N2O36 | 2 | [M-2H+K]-  | 1773.92600 | 1736.98119 | 2.136 |
| C82H148N2O37 | 5 | [M-2H+Na]- | 1773.95630 | 1752.97611 | 3.455 |
| C82H148N2O37 | 5 | [M-2H+Na]- | 1773.95850 | 1752.97611 | 4.695 |
| C80H143N3O37 | 3 | [M-2H+K]-  | 1774.88840 | 1737.94005 | 0.143 |
| C80H143N3O37 | 3 | [M-2H+K]-  | 1774.89080 | 1737.94005 | 1.209 |
| C80H143N3O38 | 3 | [M-2H+Na]- | 1774.90460 | 1753.93497 | 2.499 |
| C80H143N3O38 | 3 | [M-2H+Na]- | 1774.91300 | 1753.93497 | 2.234 |
| C85H153N3O35 | 5 | [M-H]-     | 1775.01920 | 1776.02847 | 1.129 |
| C82H149NO38  | 5 | [M-2H+Na]- | 1776.94960 | 1755.97577 | 0.134 |
| C80H144N2O38 | 3 | [M-2H+K]-  | 1777.89520 | 1740.93972 | 3.870 |
| C83H149N3O37 | 2 | [M-H]-     | 1778.97690 | 1779.98700 | 1.593 |
| C83H149N3O37 | 2 | [M-H]-     | 1778.98030 | 1779.98700 | 0.318 |
| C84H150N4O34 | 5 | [M-2H+Na]- | 1779.98360 | 1759.01316 | 2.036 |
| C84H150N4O34 | 5 | [M-2H+Na]- | 1779.99090 | 1759.01316 | 2.065 |
| C82H147N3O38 | 2 | [M-H]-     | 1780.96130 | 1781.96627 | 1.292 |
| C82H146N2O39 | 2 | [M-H]-     | 1781.93850 | 1782.95029 | 2.534 |
| C84H152N4O33 | 5 | [M-2H+K]-  | 1781.97590 | 1745.03389 | 3.700 |
| C84H152N4O33 | 5 | [M-2H+K]-  | 1781.97990 | 1745.03389 | 1.455 |
| C81H142N4O37 | 5 | [M-2H+Na]- | 1783.90960 | 1762.93530 | 0.130 |
| C83H149N3O35 | 1 | [M-2H+K]-  | 1784.95370 | 1747.99717 | 4.440 |
| C83H149N3O36 | 4 | [M-2H+Na]- | 1784.96680 | 1763.99209 | 0.361 |
| C81H144N4O36 | 4 | [M-2H+K]-  | 1785.91180 | 1748.95604 | 4.010 |

|              |   |            |            |            |       |
|--------------|---|------------|------------|------------|-------|
| C84H152N2O36 | 2 | [M-2H+Na]- | 1785.99010 | 1765.01249 | 1.984 |
| C82H147N3O37 | 3 | [M-2H+Na]- | 1786.95190 | 1765.97135 | 3.626 |
| C80H141N3O39 | 1 | [M-2H+Na]- | 1788.89160 | 1767.91423 | 1.845 |
| C81H145N3O37 | 6 | [M-2H+K]-  | 1788.90160 | 1751.95570 | 1.512 |
| C81H145N3O37 | 6 | [M-2H+K]-  | 1788.90680 | 1751.95570 | 1.395 |
| C85H151N3O36 | 1 | [M-H]-     | 1789.00740 | 1790.00774 | 3.874 |
| C82H148N2O38 | 4 | [M-2H+Na]- | 1789.94430 | 1768.97102 | 0.439 |
| C80H143N3O38 | 3 | [M-2H+K]-  | 1790.88970 | 1753.93497 | 3.423 |
| C85H153N3O36 | 2 | [M-H]-     | 1791.00940 | 1792.02339 | 3.752 |
| C85H153N3O36 | 2 | [M-H]-     | 1791.01240 | 1792.02339 | 2.076 |
| C82H144N4O38 | 3 | [M-H]-     | 1791.93800 | 1792.94587 | 0.334 |
| C82H144N4O38 | 3 | [M-H]-     | 1791.94660 | 1792.94587 | 4.466 |
| C86H154N4O33 | 4 | [M-2H+Na]- | 1792.02300 | 1771.04954 | 0.340 |
| C86H154N4O33 | 4 | [M-2H+Na]- | 1792.03250 | 1771.04954 | 4.961 |
| C86H156N2O36 | 3 | [M-H]-     | 1792.03250 | 1793.04379 | 2.243 |
| C82H149NO38  | 5 | [M-2H+K]-  | 1792.92470 | 1755.97577 | 0.183 |
| C84H151N3O37 | 4 | [M-H]-     | 1792.99700 | 1794.00265 | 0.901 |
| C82H145N3O39 | 1 | [M-H]-     | 1794.93570 | 1795.94553 | 1.428 |
| C85H151N3O35 | 4 | [M-2H+Na]- | 1794.98310 | 1774.01282 | 2.111 |
| C84H150N4O34 | 5 | [M-2H+K]-  | 1795.95600 | 1759.01316 | 3.206 |
| C84H150N4O34 | 5 | [M-2H+K]-  | 1795.96410 | 1759.01316 | 1.304 |
| C84H152N2O38 | 2 | [M-H]-     | 1795.99690 | 1797.00232 | 1.030 |
| C85H153N3O35 | 5 | [M-2H+Na]- | 1797.00510 | 1776.02847 | 1.425 |
| C83H148N4O36 | 1 | [M-2H+Na]- | 1797.96630 | 1776.98734 | 2.723 |
| C85H152N2O35 | 1 | [M-2H+K]-  | 1797.96630 | 1761.01758 | 0.070 |
| C81H142N4O37 | 5 | [M-2H+K]-  | 1799.88230 | 1762.93530 | 0.890 |
| C85H154N2O35 | 5 | [M-2H+K]-  | 1799.97330 | 1763.03323 | 4.736 |
| C85H154N2O35 | 5 | [M-2H+K]-  | 1799.97450 | 1763.03323 | 4.069 |
| C85H154N2O35 | 5 | [M-2H+K]-  | 1799.97560 | 1763.03323 | 3.458 |
| C85H154N2O35 | 5 | [M-2H+K]-  | 1799.99000 | 1763.03323 | 4.542 |
| C83H149N3O36 | 4 | [M-2H+K]-  | 1800.94460 | 1763.99209 | 2.172 |
| C87H155N3O35 | 4 | [M-H]-     | 1801.03460 | 1802.04412 | 1.252 |
| C84H151NO38  | 1 | [M-2H+Na]- | 1802.96930 | 1781.99142 | 2.114 |
| C82H146N2O39 | 2 | [M-2H+Na]- | 1803.92910 | 1782.95029 | 2.633 |
| C84H153NO38  | 4 | [M-2H+Na]- | 1804.97760 | 1784.00707 | 1.960 |
| C84H153NO38  | 4 | [M-2H+Na]- | 1804.97910 | 1784.00707 | 1.129 |
| C85H151N3O37 | 4 | [M-H]-     | 1804.99490 | 1806.00265 | 0.268 |
| C86H155N3O36 | 2 | [M-H]-     | 1805.02280 | 1806.03904 | 4.969 |
| C82H144N4O39 | 1 | [M-H]-     | 1807.92980 | 1808.94078 | 2.054 |
| C86H154N4O33 | 4 | [M-2H+K]-  | 1807.99780 | 1771.04954 | 0.190 |
| C98H195O21PS | 3 | [M-2H+K]-  | 1808.31290 | 1771.36493 | 0.348 |
| C98H195O21PS | 3 | [M-2H+K]-  | 1808.32240 | 1771.36493 | 4.906 |
| C84H151N3O38 | 4 | [M-H]-     | 1808.99210 | 1809.99757 | 0.996 |
| C84H151N3O38 | 4 | [M-H]-     | 1808.99620 | 1809.99757 | 3.262 |
| C86H155NO38  | 3 | [M-H]-     | 1809.02060 | 1810.02272 | 2.846 |
| C84H150N2O39 | 3 | [M-H]-     | 1809.97650 | 1810.98159 | 1.207 |
| C86H157NO38  | 4 | [M-H]-     | 1811.02710 | 1812.03837 | 2.210 |
| C86H157NO38  | 4 | [M-H]-     | 1811.03220 | 1812.03837 | 0.606 |
| C83H146N4O37 | 1 | [M-2H+Na]- | 1811.94380 | 1790.96660 | 1.728 |

|                |   |            |            |            |       |
|----------------|---|------------|------------|------------|-------|
| C86H154N2O36   | 1 | [M-2H+Na]- | 1812.00090 | 1791.02814 | 0.721 |
| C85H153N3O35   | 5 | [M-2H+K]-  | 1812.97360 | 1776.02847 | 1.916 |
| C85H153N3O35   | 5 | [M-2H+K]-  | 1812.97630 | 1776.02847 | 0.427 |
| C85H153N3O35   | 5 | [M-2H+K]-  | 1812.98380 | 1776.02847 | 3.710 |
| C81H140N4O38   | 2 | [M-2H+K]-  | 1813.86880 | 1776.91457 | 3.106 |
| C81H140N4O38   | 2 | [M-2H+K]-  | 1813.86890 | 1776.91457 | 3.161 |
| C82H144N4O38   | 3 | [M-2H+Na]- | 1813.92250 | 1792.94587 | 1.415 |
| C86H156N2O36   | 3 | [M-2H+Na]- | 1814.01290 | 1793.04379 | 2.732 |
| C84H151N3O36   | 1 | [M-2H+K]-  | 1814.96310 | 1778.00774 | 3.725 |
| C84H151N3O37   | 4 | [M-2H+Na]- | 1814.96980 | 1794.00265 | 3.813 |
| C84H151N3O37   | 4 | [M-2H+Na]- | 1814.97080 | 1794.00265 | 3.262 |
| C84H151N3O37   | 4 | [M-2H+Na]- | 1814.98360 | 1794.00265 | 3.791 |
| C84H152N2O37   | 1 | [M-2H+K]-  | 1817.95410 | 1781.00741 | 1.048 |
| C88H158N2O36   | 3 | [M-H]-     | 1818.05820 | 1819.05944 | 3.317 |
| C82H147N3O38   | 2 | [M-2H+K]-  | 1818.91350 | 1781.96627 | 0.753 |
| C84H148N4O38   | 1 | [M-H]-     | 1819.97050 | 1820.97717 | 0.331 |
| C88H160N2O36   | 2 | [M-H]-     | 1820.06430 | 1821.07509 | 1.934 |
| C84H153N038    | 4 | [M-2H+K]-  | 1820.95090 | 1784.00707 | 2.621 |
| C84H153N038    | 4 | [M-2H+K]-  | 1820.96180 | 1784.00707 | 3.365 |
| C84H149N3O39   | 1 | [M-H]-     | 1822.96580 | 1823.97683 | 2.065 |
| C87H155N3O35   | 4 | [M-2H+Na]- | 1823.01950 | 1802.04412 | 0.719 |
| C87H155N3O35   | 4 | [M-2H+Na]- | 1823.02620 | 1802.04412 | 4.394 |
| C83H147N3O40   | 1 | [M-H]-     | 1824.95260 | 1825.95610 | 2.066 |
| C85H152N4O36   | 2 | [M-2H+Na]- | 1825.98990 | 1805.01864 | 1.536 |
| C85H152N4O36   | 2 | [M-2H+Na]- | 1825.99870 | 1805.01864 | 3.284 |
| C85H151N3O37   | 4 | [M-2H+Na]- | 1826.97430 | 1806.00265 | 1.325 |
| C85H151N3O37   | 4 | [M-2H+Na]- | 1826.98300 | 1806.00265 | 3.437 |
| C86H155N3O36   | 2 | [M-2H+Na]- | 1827.01690 | 1806.03904 | 2.077 |
| C85H153N3O37   | 2 | [M-2H+Na]- | 1828.98410 | 1808.01830 | 4.522 |
| C85H153N3O37   | 2 | [M-2H+Na]- | 1828.99710 | 1808.01830 | 2.586 |
| C86H156N2O36   | 3 | [M-2H+K]-  | 1829.99730 | 1793.04379 | 2.683 |
| C86H156N2O37   | 2 | [M-2H+Na]- | 1830.01740 | 1809.03871 | 2.529 |
| C87H154N4O36   | 3 | [M-H]-     | 1830.02140 | 1831.03429 | 3.070 |
| C86H156N2O37   | 2 | [M-2H+Na]- | 1830.02140 | 1809.03871 | 4.715 |
| C96H182N2O24P2 | 2 | [M-2H+Na]- | 1830.23850 | 1809.25579 | 4.725 |
| C96H182N2O24P2 | 2 | [M-2H+Na]- | 1830.23880 | 1809.25579 | 4.889 |
| C84H151N3O38   | 4 | [M-2H+Na]- | 1830.97070 | 1809.99757 | 0.511 |
| C84H151N3O38   | 4 | [M-2H+Na]- | 1830.97900 | 1809.99757 | 4.022 |
| C86H155N038    | 3 | [M-2H+Na]- | 1831.00100 | 1810.02272 | 2.300 |
| C88H157N3O36   | 2 | [M-H]-     | 1831.04200 | 1832.05469 | 2.960 |
| C88H157N3O36   | 2 | [M-H]-     | 1831.05310 | 1832.05469 | 3.103 |
| C87H156N4O36   | 3 | [M-H]-     | 1832.04940 | 1833.04994 | 3.675 |
| C86H157N038    | 4 | [M-2H+Na]- | 1833.01230 | 1812.03837 | 0.075 |
| C84H152N2O38   | 2 | [M-2H+K]-  | 1833.95420 | 1797.00232 | 1.788 |
| C88H158N2O37   | 1 | [M-H]-     | 1834.04210 | 1835.05436 | 2.718 |
| C87H157N3O37   | 2 | [M-H]-     | 1835.03570 | 1836.04960 | 3.615 |
| C84H148N4O39   | 2 | [M-H]-     | 1835.95940 | 1836.97208 | 2.948 |
| C84H148N4O39   | 2 | [M-H]-     | 1835.97380 | 1836.97208 | 4.895 |
| C86H152N2O39   | 3 | [M-H]-     | 1835.98850 | 1836.99724 | 0.798 |



|              |   |            |            |            |       |
|--------------|---|------------|------------|------------|-------|
| C88H160N2O37 | 5 | [M-H]-     | 1836.06070 | 1837.07001 | 1.108 |
| C86H154N2O39 | 6 | [M-H]-     | 1837.99930 | 1839.01289 | 3.436 |
| C86H154N2O39 | 6 | [M-H]-     | 1838.00390 | 1839.01289 | 0.933 |
| C86H154N2O39 | 6 | [M-H]-     | 1838.00950 | 1839.01289 | 2.114 |
| C87H155N3O35 | 4 | [M-2H+K]-  | 1839.00140 | 1802.04412 | 4.718 |
| C85H150N4O37 | 4 | [M-2H+Na]- | 1839.97320 | 1818.99790 | 0.669 |
| C87H157N3O35 | 1 | [M-2H+K]-  | 1841.00050 | 1804.05977 | 4.277 |
| C87H157N3O36 | 2 | [M-2H+Na]- | 1841.02750 | 1820.05469 | 0.682 |
| C85H152N4O37 | 1 | [M-2H+Na]- | 1841.99510 | 1821.01355 | 4.061 |
| C88H160N2O36 | 2 | [M-2H+Na]- | 1842.04660 | 1821.07509 | 1.388 |
| C85H151N3O37 | 4 | [M-2H+K]-  | 1842.94670 | 1806.00265 | 2.471 |
| C87H152N4O37 | 2 | [M-H]-     | 1844.00960 | 1845.01355 | 1.799 |
| C86H155NO38  | 3 | [M-2H+K]-  | 1846.97810 | 1810.02272 | 3.670 |
| C84H150N2O39 | 3 | [M-2H+K]-  | 1847.92300 | 1810.98159 | 3.888 |
| C84H150N2O39 | 3 | [M-2H+K]-  | 1847.92380 | 1810.98159 | 3.455 |
| C87H156N4O37 | 3 | [M-H]-     | 1848.02840 | 1849.04485 | 4.969 |
| C87H156N4O37 | 3 | [M-H]-     | 1848.03850 | 1849.04485 | 0.496 |
| C86H157NO38  | 4 | [M-2H+K]-  | 1848.97860 | 1812.03837 | 4.528 |
| C88H159N3O37 | 4 | [M-H]-     | 1849.06380 | 1850.06525 | 3.145 |
| C84H146N4O40 | 1 | [M-H]-     | 1849.93900 | 1850.95135 | 2.745 |
| C86H153N3O39 | 3 | [M-H]-     | 1850.99300 | 1852.00813 | 4.249 |
| C86H153N3O39 | 3 | [M-H]-     | 1850.99710 | 1852.00813 | 2.033 |
| C87H154N4O36 | 3 | [M-2H+Na]- | 1852.01320 | 1831.03429 | 2.617 |
| C88H160N2O38 | 4 | [M-H]-     | 1852.05840 | 1853.06492 | 0.405 |
| C87H155N3O37 | 1 | [M-2H+Na]- | 1855.01630 | 1834.03395 | 4.464 |
| C85H150N4O37 | 4 | [M-2H+K]-  | 1855.94720 | 1818.99790 | 0.376 |
| C85H150N4O37 | 4 | [M-2H+K]-  | 1855.94730 | 1818.99790 | 0.429 |
| C85H150N4O37 | 4 | [M-2H+K]-  | 1855.94960 | 1818.99790 | 1.669 |
| C88H158N2O36 | 3 | [M-2H+K]-  | 1856.00370 | 1819.05944 | 2.338 |
| C88H158N2O36 | 3 | [M-2H+K]-  | 1856.00440 | 1819.05944 | 1.961 |
| C87H157N3O36 | 2 | [M-2H+K]-  | 1857.00870 | 1820.05469 | 2.914 |
| C86H152N2O39 | 3 | [M-2H+Na]- | 1857.97840 | 1836.99724 | 3.821 |
| C88H160N2O37 | 5 | [M-2H+Na]- | 1858.04260 | 1837.07001 | 0.792 |
| C89H158N4O36 | 5 | [M-H]-     | 1858.04910 | 1859.06559 | 4.961 |
| C88H160N2O37 | 5 | [M-2H+Na]- | 1858.04910 | 1837.07001 | 2.707 |
| C89H158N4O36 | 5 | [M-H]-     | 1858.05450 | 1859.06559 | 2.055 |
| C89H158N4O36 | 5 | [M-H]-     | 1858.06080 | 1859.06559 | 1.336 |
| C86H155N3O37 | 1 | [M-2H+K]-  | 1858.97450 | 1822.03395 | 4.332 |
| C86H155N3O38 | 3 | [M-2H+Na]- | 1858.99720 | 1838.02887 | 3.085 |
| C90H161N3O36 | 5 | [M-H]-     | 1859.07990 | 1860.08599 | 0.635 |
| C90H161N3O36 | 5 | [M-H]-     | 1859.08370 | 1860.08599 | 2.679 |
| C86H154N2O38 | 2 | [M-2H+K]-  | 1859.96460 | 1823.01797 | 1.059 |
| C86H154N2O38 | 2 | [M-2H+K]-  | 1859.96950 | 1823.01797 | 1.575 |
| C86H154N2O39 | 6 | [M-2H+Na]- | 1859.97980 | 1839.01289 | 3.845 |
| C86H154N2O39 | 6 | [M-2H+Na]- | 1859.98710 | 1839.01289 | 0.080 |
| C87H152N4O38 | 3 | [M-H]-     | 1860.00900 | 1861.00847 | 4.195 |
| C89H160N4O36 | 3 | [M-H]-     | 1860.07250 | 1861.08124 | 0.789 |
| C89H160N4O36 | 3 | [M-H]-     | 1860.07450 | 1861.08124 | 0.286 |
| C82H144N4O40 | 1 | [M-2H+K]-  | 1861.88070 | 1824.93570 | 1.932 |

|                |   |            |            |            |       |
|----------------|---|------------|------------|------------|-------|
| C86H156N2O38   | 1 | [M-2H+K]-  | 1861.97550 | 1825.03362 | 3.609 |
| C86H152N4O39   | 2 | [M-H]-     | 1864.00100 | 1865.00338 | 2.622 |
| C88H159N3O38   | 1 | [M-H]-     | 1865.04720 | 1866.06017 | 3.056 |
| C85H150N4O40   | 2 | [M-H]-     | 1865.97770 | 1866.98265 | 1.244 |
| C87H152N4O37   | 2 | [M-2H+Na]- | 1865.98910 | 1845.01355 | 0.794 |
| C88H158N2O39   | 4 | [M-H]-     | 1866.02940 | 1867.04419 | 4.027 |
| C88H158N2O39   | 4 | [M-H]-     | 1866.03250 | 1867.04419 | 2.366 |
| C84H148N4O41   | 1 | [M-H]-     | 1867.94680 | 1868.96191 | 4.199 |
| C87H154N4O36   | 3 | [M-2H+K]-  | 1867.98980 | 1831.03429 | 3.700 |
| C87H154N4O37   | 3 | [M-2H+Na]- | 1868.00340 | 1847.02920 | 0.070 |
| C85H148N4O38   | 1 | [M-2H+K]-  | 1869.93120 | 1832.97717 | 2.905 |
| C86H152N4O38   | 4 | [M-2H+Na]- | 1869.97430 | 1849.00847 | 4.403 |
| C86H152N4O38   | 4 | [M-2H+Na]- | 1869.97940 | 1849.00847 | 1.676 |
| C87H156N4O36   | 3 | [M-2H+K]-  | 1869.99420 | 1833.04994 | 2.320 |
| C87H156N4O36   | 3 | [M-2H+K]-  | 1870.00210 | 1833.04994 | 1.905 |
| C87H156N4O37   | 3 | [M-2H+Na]- | 1870.01670 | 1849.04485 | 1.187 |
| C88H159N3O36   | 1 | [M-2H+K]-  | 1871.01910 | 1834.07034 | 0.086 |
| C88H159N3O37   | 4 | [M-2H+Na]- | 1871.03570 | 1850.06525 | 1.935 |
| C89H156N4O37   | 5 | [M-H]-     | 1872.04380 | 1873.04485 | 3.321 |
| C89H156N4O37   | 5 | [M-H]-     | 1872.04640 | 1873.04485 | 4.710 |
| C86H153N3O39   | 3 | [M-2H+Na]- | 1872.98720 | 1852.00813 | 2.670 |
| C87H157N3O37   | 2 | [M-2H+K]-  | 1872.99660 | 1836.04960 | 0.856 |
| C84H150N2O43   | 3 | [M-H]-     | 1873.94540 | 1874.96125 | 4.576 |
| C86H152N2O39   | 3 | [M-2H+K]-  | 1873.94540 | 1836.99724 | 0.232 |
| C84H148N4O40   | 1 | [M-2H+Na]- | 1873.94540 | 1852.96700 | 2.314 |
| C88H160N2O37   | 5 | [M-2H+K]-  | 1874.02080 | 1837.07001 | 1.171 |
| C88H160N2O37   | 5 | [M-2H+K]-  | 1874.02680 | 1837.07001 | 4.373 |
| C88H160N2O38   | 4 | [M-2H+Na]- | 1874.04030 | 1853.06492 | 0.701 |
| C86H155N3O38   | 3 | [M-2H+K]-  | 1874.97580 | 1838.02887 | 0.890 |
| C86H155N3O38   | 3 | [M-2H+K]-  | 1874.97680 | 1838.02887 | 0.357 |
| C90H161N3O37   | 2 | [M-H]-     | 1875.06820 | 1876.08090 | 2.898 |
| C86H154N2O39   | 6 | [M-2H+K]-  | 1875.95790 | 1839.01289 | 1.911 |
| C89H160N4O37   | 2 | [M-H]-     | 1876.05990 | 1877.07615 | 4.788 |
| C88H155N3O39   | 2 | [M-H]-     | 1877.01180 | 1878.02378 | 2.511 |
| C88H155N3O39   | 2 | [M-H]-     | 1877.02440 | 1878.02378 | 4.201 |
| C90H163N3O37   | 3 | [M-H]-     | 1877.09100 | 1878.09655 | 0.914 |
| C88H157N3O39   | 3 | [M-H]-     | 1879.02830 | 1880.03943 | 2.056 |
| C88H157N3O39   | 3 | [M-H]-     | 1879.03740 | 1880.03943 | 2.787 |
| C89H158N4O36   | 5 | [M-2H+Na]- | 1880.03440 | 1859.06559 | 2.795 |
| C89H158N4O36   | 5 | [M-2H+Na]- | 1880.04420 | 1859.06559 | 2.418 |
| C87H155N3O40   | 5 | [M-H]-     | 1881.01450 | 1882.01870 | 1.633 |
| C87H155N3O40   | 5 | [M-H]-     | 1881.01660 | 1882.01870 | 2.749 |
| C90H161N3O36   | 5 | [M-2H+Na]- | 1881.06210 | 1860.08599 | 1.087 |
| C90H161N3O36   | 5 | [M-2H+Na]- | 1881.06290 | 1860.08599 | 1.512 |
| C84H154N2O37P2 | 1 | [M-2H+K]-  | 1881.91230 | 1844.97058 | 3.656 |
| C87H152N4O38   | 3 | [M-2H+Na]- | 1881.98190 | 1861.00847 | 0.337 |
| C87H152N4O38   | 3 | [M-2H+Na]- | 1881.98220 | 1861.00847 | 0.177 |
| C84H151NO43    | 2 | [M-2H+Na]- | 1882.93330 | 1861.96600 | 3.592 |
| C84H151NO43    | 2 | [M-2H+Na]- | 1882.94340 | 1861.96600 | 1.772 |

|              |   |            |            |            |       |
|--------------|---|------------|------------|------------|-------|
| C86H153N3O41 | 3 | [M-H]-     | 1882.99090 | 1883.99796 | 0.109 |
| C90H163N3O36 | 1 | [M-2H+Na]- | 1883.07800 | 1862.10164 | 1.219 |
| C87H154N4O37 | 3 | [M-2H+K]-  | 1883.96880 | 1847.02920 | 4.779 |
| C87H154N4O37 | 3 | [M-2H+K]-  | 1883.98340 | 1847.02920 | 2.971 |
| C88H157N3O37 | 2 | [M-2H+K]-  | 1884.99960 | 1848.04960 | 0.741 |
| C88H157N3O37 | 2 | [M-2H+K]-  | 1885.00380 | 1848.04960 | 2.969 |
| C88H157N3O38 | 4 | [M-2H+Na]- | 1885.01700 | 1864.04452 | 0.841 |
| C86H152N4O38 | 4 | [M-2H+K]-  | 1885.95740 | 1849.00847 | 0.176 |
| C86H152N4O38 | 4 | [M-2H+K]-  | 1885.96400 | 1849.00847 | 3.676 |
| C86H152N4O39 | 2 | [M-2H+Na]- | 1885.97790 | 1865.00338 | 0.239 |
| C88H159N3O37 | 4 | [M-2H+K]-  | 1887.01230 | 1850.06525 | 0.824 |
| C86H154N4O38 | 2 | [M-2H+K]-  | 1887.96970 | 1851.02412 | 1.599 |
| C86H154N4O38 | 2 | [M-2H+K]-  | 1887.97470 | 1851.02412 | 1.050 |
| C89H156N4O38 | 2 | [M-H]-     | 1888.03530 | 1889.03977 | 1.484 |
| C86H155N4O43 | 2 | [M-H]-     | 1888.98290 | 1889.99730 | 3.773 |
| C88H160N2O38 | 4 | [M-2H+K]-  | 1890.00860 | 1853.06492 | 2.603 |
| C88H160N2O38 | 4 | [M-2H+K]-  | 1890.01480 | 1853.06492 | 0.677 |
| C90H161N3O38 | 6 | [M-H]-     | 1891.06330 | 1892.07582 | 2.776 |
| C88H156N4O39 | 2 | [M-H]-     | 1892.02270 | 1893.03468 | 2.491 |
| C90H163N3O38 | 3 | [M-H]-     | 1893.09360 | 1894.09147 | 4.966 |
| C89H156N4O37 | 5 | [M-2H+Na]- | 1894.01180 | 1873.04485 | 3.759 |
| C87H154N4O40 | 2 | [M-H]-     | 1894.01180 | 1895.01395 | 2.704 |
| C89H156N4O37 | 5 | [M-2H+Na]- | 1894.01210 | 1873.04485 | 3.600 |
| C87H154N4O40 | 2 | [M-H]-     | 1894.01210 | 1895.01395 | 2.863 |
| C84H150N2O43 | 3 | [M-2H+Na]- | 1895.93210 | 1874.96125 | 1.694 |
| C89H158N4O37 | 3 | [M-2H+Na]- | 1896.02670 | 1875.06050 | 4.150 |
| C89H158N4O37 | 3 | [M-2H+Na]- | 1896.02960 | 1875.06050 | 2.621 |
| C90H161N3O36 | 5 | [M-2H+K]-  | 1897.03420 | 1860.08599 | 0.205 |
| C90H161N3O37 | 2 | [M-2H+Na]- | 1897.06060 | 1876.08090 | 2.968 |
| C89H160N4O36 | 3 | [M-2H+K]-  | 1898.03910 | 1861.08124 | 4.880 |
| C86H153N3O42 | 4 | [M-H]-     | 1898.97770 | 1899.99288 | 4.165 |
| C90H163N3O37 | 3 | [M-2H+Na]- | 1899.07740 | 1878.09655 | 3.570 |
| C86H150N4O40 | 2 | [M-2H+Na]- | 1899.95530 | 1878.98265 | 0.744 |
| C88H158N4O38 | 3 | [M-2H+Na]- | 1900.02510 | 1879.05542 | 2.307 |
| C88H158N4O38 | 3 | [M-2H+Na]- | 1900.03270 | 1879.05542 | 1.693 |
| C88H157N3O38 | 4 | [M-2H+K]-  | 1900.98830 | 1864.04452 | 2.535 |
| C88H157N3O38 | 4 | [M-2H+K]-  | 1900.99180 | 1864.04452 | 0.694 |
| C88H157N3O38 | 4 | [M-2H+K]-  | 1900.99790 | 1864.04452 | 2.515 |
| C87H155N3O40 | 5 | [M-2H+Na]- | 1902.99230 | 1882.01870 | 0.244 |
| C85H150N4O40 | 2 | [M-2H+K]-  | 1903.92370 | 1866.98265 | 3.964 |
| C88H158N2O39 | 4 | [M-2H+K]-  | 1903.98710 | 1867.04419 | 2.986 |
| C88H158N2O39 | 4 | [M-2H+K]-  | 1903.99770 | 1867.04419 | 2.581 |
| C90H160N4O38 | 2 | [M-H]-     | 1904.06170 | 1905.07107 | 1.102 |
| C86H153N3O41 | 3 | [M-2H+Na]- | 1904.96850 | 1883.99796 | 1.853 |
| C90H159N3O39 | 5 | [M-H]-     | 1905.04740 | 1906.05508 | 0.217 |
| C90H159N3O39 | 5 | [M-H]-     | 1905.05000 | 1906.05508 | 1.147 |
| C88H154N4O40 | 3 | [M-H]-     | 1906.00240 | 1907.01395 | 2.244 |
| C90H162N4O38 | 2 | [M-H]-     | 1906.08250 | 1907.08672 | 1.601 |
| C88H156N4O40 | 3 | [M-H]-     | 1908.02240 | 1909.02960 | 0.038 |

|                |   |            |            |            |       |
|----------------|---|------------|------------|------------|-------|
| C89H159N3O40   | 5 | [M-H]-     | 1909.03510 | 1910.05000 | 3.996 |
| C89H159N3O40   | 5 | [M-H]-     | 1909.03670 | 1910.05000 | 3.158 |
| C89H159N3O40   | 5 | [M-H]-     | 1909.03720 | 1910.05000 | 2.896 |
| C89H156N4O37   | 5 | [M-2H+K]-  | 1909.99470 | 1873.04485 | 0.653 |
| C87H154N4O41   | 4 | [M-H]-     | 1909.99470 | 1911.00886 | 3.609 |
| C86H155N4O43   | 2 | [M-2H+Na]- | 1910.97020 | 1889.99730 | 0.609 |
| C84H150N2O43   | 3 | [M-2H+K]-  | 1911.90310 | 1874.96125 | 3.528 |
| C89H158N4O37   | 3 | [M-2H+K]-  | 1912.00880 | 1875.06050 | 0.158 |
| C90H161N3O38   | 6 | [M-2H+Na]- | 1913.04170 | 1892.07582 | 4.279 |
| C90H161N3O38   | 6 | [M-2H+Na]- | 1913.05640 | 1892.07582 | 3.406 |
| C88H156N4O38   | 1 | [M-2H+K]-  | 1913.99460 | 1877.03977 | 3.256 |
| C88H156N4O39   | 2 | [M-2H+Na]- | 1914.00860 | 1893.03468 | 0.078 |
| C89H160N4O37   | 2 | [M-2H+K]-  | 1914.02180 | 1877.07615 | 1.543 |
| C91H158N4O38   | 3 | [M-H]-     | 1914.04050 | 1915.05542 | 3.996 |
| C90H163N3O37   | 3 | [M-2H+K]-  | 1915.04440 | 1878.09655 | 0.394 |
| C90H163N3O38   | 3 | [M-2H+Na]- | 1915.06890 | 1894.09147 | 1.757 |
| C86H150N4O40   | 2 | [M-2H+K]-  | 1915.93490 | 1878.98265 | 1.906 |
| C88H158N4O38   | 3 | [M-2H+K]-  | 1916.00640 | 1879.05542 | 1.243 |
| C91H160N4O38   | 1 | [M-H]-     | 1916.05580 | 1917.07107 | 4.174 |
| C88H157N3O39   | 3 | [M-2H+K]-  | 1916.98110 | 1880.03943 | 3.617 |
| C88H159N4O43   | 2 | [M-H]-     | 1917.02000 | 1918.02860 | 0.692 |
| C86H152N4O41   | 1 | [M-2H+Na]- | 1917.97380 | 1896.99321 | 3.400 |
| C95H156N8O28P2 | 2 | [M-H]-     | 1918.03810 | 1919.05044 | 2.642 |
| C90H158N4O39   | 2 | [M-H]-     | 1918.03810 | 1919.05033 | 2.588 |
| C87H155N3O40   | 5 | [M-2H+K]-  | 1918.96010 | 1882.01870 | 3.751 |
| C87H155N3O40   | 5 | [M-2H+K]-  | 1918.96490 | 1882.01870 | 1.250 |
| C85H150N4O42   | 2 | [M-2H+Na]- | 1919.93890 | 1898.97248 | 3.981 |
| C86H153N3O41   | 3 | [M-2H+K]-  | 1920.94430 | 1883.99796 | 1.179 |
| C86H153N3O42   | 4 | [M-2H+Na]- | 1920.96490 | 1899.99288 | 1.065 |
| C86H154N2O43   | 3 | [M-2H+Na]- | 1923.96490 | 1902.99255 | 0.889 |
| C89H154N4O38   | 1 | [M-2H+K]-  | 1923.96490 | 1887.02412 | 4.063 |
| C90H158N4O38   | 1 | [M-2H+Na]- | 1924.03230 | 1903.05542 | 1.464 |
| C87H154N4O42   | 6 | [M-H]-     | 1925.98880 | 1927.00378 | 4.002 |
| C89H156N4O38   | 2 | [M-2H+K]-  | 1925.98880 | 1889.03977 | 0.224 |
| C87H154N4O42   | 6 | [M-H]-     | 1926.00250 | 1927.00378 | 3.111 |
| C87H154N4O42   | 6 | [M-H]-     | 1926.00370 | 1927.00378 | 3.734 |
| C87H154N4O42   | 6 | [M-H]-     | 1926.00570 | 1927.00378 | 4.773 |
| C90H160N4O38   | 2 | [M-2H+Na]- | 1926.04190 | 1905.07107 | 1.679 |
| C88H157N3O42   | 4 | [M-H]-     | 1927.00750 | 1928.02418 | 4.883 |
| C88H157N3O42   | 4 | [M-H]-     | 1927.01110 | 1928.02418 | 3.015 |
| C90H159N3O39   | 5 | [M-2H+Na]- | 1927.02660 | 1906.05508 | 1.323 |
| C90H159N3O39   | 5 | [M-2H+Na]- | 1927.02690 | 1906.05508 | 1.168 |
| C90H161N3O38   | 6 | [M-2H+K]-  | 1929.02550 | 1892.07582 | 0.560 |
| C90H161N3O38   | 6 | [M-2H+K]-  | 1929.02850 | 1892.07582 | 2.116 |
| C90H161N3O38   | 6 | [M-2H+K]-  | 1929.03050 | 1892.07582 | 3.152 |
| C90H161N3O39   | 1 | [M-2H+Na]- | 1929.04060 | 1908.07073 | 2.177 |
| C88H156N4O40   | 3 | [M-2H+Na]- | 1929.99990 | 1909.02960 | 1.950 |
| C90H163N3O38   | 3 | [M-2H+K]-  | 1931.04890 | 1894.09147 | 4.573 |
| C87H154N4O41   | 4 | [M-2H+Na]- | 1931.98130 | 1911.00886 | 0.843 |

|                |   |            |            |            |       |
|----------------|---|------------|------------|------------|-------|
| C87H154N4O41   | 4 | [M-2H+Na]- | 1931.98260 | 1911.00886 | 0.170 |
| C87H154N4O41   | 4 | [M-2H+Na]- | 1931.99060 | 1911.00886 | 3.971 |
| C85H150N4O42   | 2 | [M-2H+K]-  | 1935.92260 | 1898.97248 | 0.786 |
| C86H153N3O42   | 4 | [M-2H+K]-  | 1936.94360 | 1899.99288 | 1.095 |
| C86H153N3O42   | 4 | [M-2H+K]-  | 1936.95110 | 1899.99288 | 4.967 |
| C87H151N5O42   | 4 | [M-H]-     | 1936.98200 | 1937.98338 | 3.043 |
| C90H161N3O41   | 3 | [M-H]-     | 1939.05180 | 1940.06056 | 0.770 |
| C86H154N2O43   | 3 | [M-2H+K]-  | 1939.93260 | 1902.99255 | 4.405 |
| C86H154N2O43   | 3 | [M-2H+K]-  | 1939.93730 | 1902.99255 | 1.982 |
| C90H158N4O39   | 2 | [M-2H+Na]- | 1940.02570 | 1919.05033 | 0.671 |
| C95H156N8O28P2 | 2 | [M-2H+Na]- | 1940.02570 | 1919.05044 | 0.617 |
| C90H159N3O39   | 5 | [M-2H+K]-  | 1942.99890 | 1906.05508 | 2.462 |
| C88H154N4O40   | 3 | [M-2H+K]-  | 1943.96640 | 1907.01395 | 1.982 |
| C88H154N4O40   | 3 | [M-2H+K]-  | 1943.96700 | 1907.01395 | 2.290 |
| C90H162N4O38   | 2 | [M-2H+K]-  | 1944.03640 | 1907.08672 | 0.557 |
| C87H153N5O41   | 1 | [M-2H+Na]- | 1944.97510 | 1924.00411 | 1.582 |
| C88H156N4O40   | 3 | [M-2H+K]-  | 1945.97470 | 1909.02960 | 1.798 |
| C88H156N4O41   | 3 | [M-2H+Na]- | 1945.98970 | 1925.02451 | 4.563 |
| C88H156N4O41   | 3 | [M-2H+Na]- | 1946.00060 | 1925.02451 | 1.039 |
| C89H159N3O40   | 5 | [M-2H+K]-  | 1946.99030 | 1910.05000 | 4.262 |
| C89H159N3O40   | 5 | [M-2H+K]-  | 1947.00280 | 1910.05000 | 2.158 |
| C87H154N4O42   | 6 | [M-2H+Na]- | 1947.97700 | 1927.00378 | 0.433 |
| C87H154N4O42   | 6 | [M-2H+Na]- | 1947.97980 | 1927.00378 | 1.004 |
| C92H164N4O39   | 1 | [M-H]-     | 1948.08600 | 1949.09728 | 2.060 |
| C88H157N3O42   | 4 | [M-2H+Na]- | 1948.99340 | 1928.02418 | 2.486 |
| C91H158N4O38   | 3 | [M-2H+K]-  | 1951.99490 | 1915.05542 | 4.671 |
| C88H158N2O43   | 1 | [M-2H+Na]- | 1951.99490 | 1931.02385 | 1.543 |
| C91H158N4O38   | 3 | [M-2H+K]-  | 1952.01340 | 1915.05542 | 4.806 |
| C88H154N4O43   | 3 | [M-H]-     | 1954.00040 | 1954.99869 | 4.594 |
| C88H159N043    | 2 | [M-2H+K]-  | 1954.98600 | 1918.02860 | 4.503 |
| C90H158N4O40   | 1 | [M-2H+Na]- | 1956.02650 | 1935.04525 | 3.674 |
| C90H160N4O39   | 1 | [M-2H+K]-  | 1958.01520 | 1921.06598 | 0.315 |
| C87H151N5O42   | 4 | [M-2H+Na]- | 1958.96620 | 1937.98338 | 4.471 |
| C89H158N4O40   | 1 | [M-2H+K]-  | 1959.99580 | 1923.04525 | 0.996 |
| C89H158N4O41   | 1 | [M-2H+Na]- | 1960.01670 | 1939.04016 | 1.261 |
| C90H161N3O41   | 3 | [M-2H+Na]- | 1961.03300 | 1940.06056 | 0.831 |
| C88H156N4O41   | 3 | [M-2H+K]-  | 1961.97230 | 1925.02451 | 0.414 |
| C88H156N4O42   | 2 | [M-2H+Na]- | 1961.99520 | 1941.01943 | 0.870 |
| C88H156N4O42   | 2 | [M-2H+Na]- | 1961.99570 | 1941.01943 | 1.124 |
| C93H165N3O40   | 1 | [M-H]-     | 1963.08830 | 1964.09695 | 0.702 |
| C92H164N4O40   | 1 | [M-H]-     | 1964.07750 | 1965.09220 | 3.782 |
| C88H157N3O42   | 4 | [M-2H+K]-  | 1964.96930 | 1928.02418 | 1.771 |
| C90H161N043    | 2 | [M-2H+Na]- | 1965.01890 | 1944.04425 | 0.299 |
| C92H167N043    | 1 | [M-H]-     | 1973.08960 | 1974.09120 | 2.875 |
| C90H160N4O40   | 2 | [M-2H+K]-  | 1974.00730 | 1937.06090 | 1.113 |
| C90H160N4O40   | 2 | [M-2H+K]-  | 1974.01270 | 1937.06090 | 1.622 |
| C87H151N5O42   | 4 | [M-2H+K]-  | 1974.92530 | 1937.98338 | 3.380 |
| C87H151N5O42   | 4 | [M-2H+K]-  | 1974.93970 | 1937.98338 | 3.911 |
| C88H154N4O43   | 3 | [M-2H+Na]- | 1975.97400 | 1954.99869 | 0.628 |

|              |   |            |            |            |       |
|--------------|---|------------|------------|------------|-------|
| C90H161N3O41 | 3 | [M-2H+K]-  | 1977.01640 | 1940.06056 | 3.660 |
| C88H156N4O43 | 2 | [M-2H+Na]- | 1977.98060 | 1957.01434 | 3.948 |
| C92H162N4O41 | 2 | [M-H]-     | 1978.06300 | 1979.07146 | 0.603 |
| C92H162N4O41 | 2 | [M-H]-     | 1978.06470 | 1979.07146 | 0.256 |
| C91H161N5O41 | 1 | [M-H]-     | 1979.06010 | 1980.06671 | 0.332 |
| C90H161NO43  | 2 | [M-2H+K]-  | 1980.99400 | 1944.04425 | 0.582 |
| C90H158N4O43 | 1 | [M-H]-     | 1982.01840 | 1983.02999 | 2.181 |
| C91H162N4O42 | 1 | [M-H]-     | 1982.05950 | 1983.06638 | 0.198 |
| C92H166N2O43 | 1 | [M-H]-     | 1986.08280 | 1987.08645 | 1.825 |
| C88H154N4O43 | 3 | [M-2H+K]-  | 1991.93860 | 1954.99869 | 4.364 |
| C93H164N4O41 | 1 | [M-H]-     | 1992.07700 | 1993.08711 | 1.427 |
| C88H156N4O43 | 2 | [M-2H+K]-  | 1993.95420 | 1957.01434 | 4.385 |
| C93H166N4O41 | 1 | [M-H]-     | 1994.09170 | 1995.10276 | 1.902 |
| C94H169N3O41 | 1 | [M-H]-     | 1995.11940 | 1996.12316 | 1.757 |
| C90H158N4O44 | 1 | [M-H]-     | 1998.00780 | 1999.02491 | 4.924 |
| C92H160N4O40 | 1 | [M-2H+K]-  | 1998.00780 | 1961.06090 | 0.850 |

Supplemental Table 4:

Lipids common to all 3 strains - separated by detection mode

| Mode | Chemical formula | MG1655 Batches | DPB635 Batches | DPB636 Batches |
|------|------------------|----------------|----------------|----------------|
|      | C15H22O5         | 3              | 1              | 2              |
|      | C21H35NO         | 1              | 1              | 1              |
|      | C23H39NO         | 2              | 1              | 1              |
|      | C22H43NO2        | 1              | 1              | 1              |
|      | C24H41NO         | 1              | 1              | 1              |
|      | C21H30O4         | 2              | 1              | 2              |
|      | C22H39N3O3       | 2              | 1              | 3              |
|      | C22H45NO2        | 2              | 1              | 2              |
|      | C23H36O4         | 1              | 1              | 1              |
|      | C23H36O4         | 2              | 1              | 1              |
|      | C28H48O4         | 1              | 1              | 2              |
|      | C27H48O5         | 2              | 1              | 1              |
|      | C27H43FO3        | 1              | 1              | 1              |
|      | C27H42O6         | 3              | 1              | 1              |
|      | C20H42NO7P       | 1              | 1              | 1              |
|      | C23H40NO7P       | 1              | 1              | 1              |
|      | C15H29O10P3      | 2              | 1              | 4              |
|      | C27H34F6O2       | 2              | 1              | 1              |
|      | C22H43O9P        | 3              | 1              | 1              |
|      | C25H44O7P2       | 4              | 1              | 3              |
|      | C26H54NO7P       | 1              | 1              | 1              |
|      | C24H48NO9P       | 2              | 1              | 1              |
|      | C26H43NO8S       | 2              | 1              | 2              |
|      | C28H48NO9P       | 1              | 1              | 1              |
|      | C26H50NO9P       | 1              | 1              | 1              |
|      | C29H56NO8P       | 1              | 1              | 1              |
|      | C38H68O2         | 1              | 1              | 1              |
|      | C34H52O8         | 1              | 1              | 1              |
|      | C34H56O8         | 2              | 1              | 2              |
|      | C31H61O8P        | 1              | 1              | 1              |
|      | C29H56NO9P       | 1              | 1              | 1              |
|      | C33H57NO8        | 2              | 1              | 1              |
|      | C27H44O11S       | 1              | 1              | 1              |
|      | C35H60O6         | 1              | 1              | 1              |
|      | C36H67NO3        | 2              | 1              | 1              |
|      | C37H72O4         | 1              | 1              | 1              |
|      | C31H60NO8P       | 1              | 1              | 1              |
|      | C34H68O8         | 2              | 1              | 1              |
|      | C34H56O9         | 1              | 1              | 1              |
|      | C36H56O9         | 2              | 1              | 1              |
|      | C35H69O7P        | 4              | 1              | 2              |
|      | C37H64N2O6       | 4              | 1              | 2              |
|      | C36H69NO8        | 2              | 1              | 1              |
|      | C17H27N3O17P2    | 2              | 1              | 1              |

|             |   |   |   |
|-------------|---|---|---|
| C38H73O7P   | 1 | 1 | 1 |
| C43H70O4    | 1 | 1 | 1 |
| C31H57O12P  | 1 | 1 | 1 |
| C35H67NO8S  | 1 | 1 | 1 |
| C37H58O10   | 1 | 1 | 1 |
| C37H75O7P   | 1 | 1 | 1 |
| C35H70NO7P  | 1 | 1 | 2 |
| C36H65O10P  | 4 | 1 | 1 |
| C42H85NO3   | 2 | 1 | 1 |
| C39H63O8P   | 3 | 1 | 4 |
| C38H66NO8P  | 2 | 1 | 1 |
| C33H63O13P  | 3 | 1 | 1 |
| C35H68NO9P  | 2 | 1 | 2 |
| C36H72NO8P  | 2 | 1 | 4 |
| C39H73O8P   | 1 | 1 | 1 |
| C36H64NO10P | 3 | 1 | 1 |
| C36H73O9P   | 1 | 1 | 1 |
| C40H65O8P   | 1 | 1 | 2 |
| C37H69O10P  | 3 | 1 | 3 |
| C39H74NO6P  | 1 | 1 | 1 |
| C37H73O8PS  | 1 | 1 | 1 |
| C50H72      | 1 | 1 | 1 |
| C38H76NO6P  | 3 | 1 | 1 |
| C34H65O13P  | 2 | 1 | 1 |
| C37H71O9P   | 2 | 1 | 3 |
| C34H62NO10P | 1 | 1 | 1 |
| C36H70NO8P  | 1 | 1 | 1 |
| C37H74NO7P  | 1 | 1 | 2 |
| C37H77N2O6P | 1 | 1 | 1 |
| C37H64O13   | 4 | 1 | 3 |
| C41H65O8P   | 2 | 1 | 2 |
| C41H67O8P   | 1 | 1 | 1 |
| C47H74O5    | 1 | 1 | 1 |
| C40H68O7P2  | 1 | 1 | 2 |
| C39H76N2O7  | 2 | 1 | 1 |
| C41H73NO9   | 1 | 1 | 2 |
| C42H80NO6P  | 2 | 1 | 1 |
| C38H77N2O6P | 1 | 1 | 2 |
| C41H79N2O6P | 1 | 1 | 1 |
| C37H72NO9P  | 1 | 1 | 5 |
| C41H71O7P   | 2 | 1 | 1 |
| C33H57NO15  | 1 | 1 | 2 |
| C39H70NO7P  | 3 | 1 | 3 |
| C43H75O7P   | 2 | 1 | 1 |
| C39H72NO7P  | 2 | 1 | 1 |
| C37H66NO10P | 1 | 1 | 1 |
| C46H68O6    | 2 | 1 | 2 |



|             |   |   |   |
|-------------|---|---|---|
| C40H80NO6P  | 1 | 1 | 2 |
| C43H74O7    | 3 | 1 | 1 |
| C51H74O2    | 1 | 1 | 1 |
| C41H69O7P   | 2 | 1 | 1 |
| C40H68NO8P  | 3 | 1 | 2 |
| C39H80NO7P  | 1 | 1 | 1 |
| C43H69O8P   | 3 | 1 | 2 |
| C42H85N2O6P | 1 | 1 | 1 |
| C42H86NO7P  | 1 | 1 | 1 |
| C40H77O10P  | 1 | 1 | 1 |
| C37H67O13P  | 1 | 1 | 1 |
| C40H76NO8P  | 2 | 1 | 4 |
| C44H84NO6P  | 2 | 1 | 1 |
| C46H86O5    | 1 | 1 | 1 |
| C38H74NO9P  | 4 | 1 | 2 |
| C43H84NO7P  | 2 | 1 | 2 |
| C37H72NO10P | 2 | 1 | 3 |
| C40H66O12   | 1 | 1 | 1 |
| C42H81O9P   | 1 | 1 | 1 |
| C45H79O7P   | 1 | 1 | 1 |
| C47H80O5    | 1 | 1 | 1 |
| C42H81NO8   | 2 | 1 | 1 |
| C41H81N2O6P | 1 | 1 | 1 |
| C42H81O8P   | 1 | 1 | 1 |
| C43H71O8P   | 2 | 1 | 1 |
| C40H75O9P   | 1 | 1 | 1 |
| C45H68O10   | 3 | 1 | 1 |
| C38H73O13P  | 3 | 1 | 1 |
| C43H70O10   | 2 | 1 | 1 |
| C41H79O8P   | 1 | 1 | 1 |
| C42H76NO9P  | 1 | 1 | 1 |
| C43H73O7P   | 1 | 1 | 1 |
| C44H83O8P   | 2 | 1 | 2 |
| C42H78NO9P  | 1 | 1 | 1 |
| C48H68O8    | 1 | 1 | 1 |
| C43H78NO7P  | 2 | 1 | 1 |
| C47H66O9    | 1 | 1 | 1 |
| C42H68NO10P | 3 | 1 | 1 |
| C45H79O8P   | 1 | 1 | 1 |
| C43H81O8P   | 1 | 1 | 1 |
| C41H76NO9P  | 1 | 1 | 1 |
| C45H86NO7P  | 3 | 1 | 1 |
| C44H75O8P   | 1 | 1 | 1 |
| C41H79O9P   | 2 | 1 | 1 |
| C56H80O2    | 2 | 1 | 1 |
| C45H72NO8P  | 3 | 1 | 1 |
| C40H78NO9P  | 1 | 1 | 1 |

|               |   |   |   |
|---------------|---|---|---|
| C39H76NO10P   | 2 | 1 | 2 |
| C40H68O15     | 1 | 1 | 1 |
| C45H89O8P     | 1 | 1 | 1 |
| C43H77O8P     | 2 | 1 | 1 |
| C42H75O9P     | 3 | 1 | 1 |
| C41H77O12S    | 2 | 1 | 1 |
| C43H82NO8P    | 3 | 1 | 1 |
| C45H82NO8P    | 1 | 1 | 1 |
| C44H88NO7P    | 2 | 1 | 2 |
| C46H88NO7P    | 2 | 1 | 1 |
| C47H74O10     | 1 | 1 | 1 |
| C44H75O8P     | 1 | 1 | 1 |
| C44H84NO9P    | 2 | 1 | 1 |
| C47H79O8P     | 1 | 1 | 1 |
| C39H75O12P    | 2 | 1 | 4 |
| C45H70NO8P    | 3 | 1 | 6 |
| C39H62O15     | 1 | 1 | 1 |
| C45H91N2O6P   | 1 | 1 | 1 |
| C29H51N3O18P2 | 1 | 1 | 1 |
| C45H77O8P     | 1 | 1 | 1 |
| C43H74NO10P   | 1 | 1 | 2 |
| C41H64O15     | 1 | 1 | 1 |
| C44H82NO9P    | 1 | 1 | 1 |
| C45H86NO8P    | 2 | 1 | 2 |
| C44H83O10P    | 1 | 1 | 1 |
| C43H82NO10P   | 1 | 1 | 2 |
| C46H80NO7P    | 2 | 1 | 1 |
| C44H76NO10P   | 3 | 1 | 1 |
| C46H80NO8P    | 1 | 1 | 1 |
| C47H83O8P     | 2 | 1 | 1 |
| C20H28O4      | 3 | 2 | 3 |
| C19H37O7P     | 1 | 2 | 1 |
| C18H35O7P     | 2 | 2 | 1 |
| C27H47NO2     | 1 | 2 | 2 |
| C21H42NO7P    | 3 | 2 | 1 |
| C23H46NO7P    | 3 | 2 | 1 |
| C30H52O5      | 2 | 2 | 2 |
| C24H50NO7P    | 3 | 2 | 1 |
| C22H44NO9P    | 3 | 2 | 2 |
| C31H45NO5     | 3 | 2 | 1 |
| C24H50NO8P    | 4 | 2 | 1 |
| C35H60O3      | 4 | 2 | 3 |
| C31H63NO3     | 1 | 2 | 2 |
| C33H67NO3     | 1 | 2 | 1 |
| C38H76O2      | 2 | 2 | 4 |
| C35H68O5      | 3 | 2 | 1 |
| C39H78O2      | 2 | 2 | 2 |

Positive

|             |   |   |   |
|-------------|---|---|---|
| C36H68O5    | 4 | 2 | 1 |
| C33H65O7P   | 2 | 2 | 2 |
| C29H57O11P  | 4 | 2 | 2 |
| C37H68O5    | 2 | 2 | 1 |
| C40H82O2    | 2 | 2 | 3 |
| C35H54O9    | 1 | 2 | 1 |
| C30H58NO10P | 2 | 2 | 3 |
| C42H82O2    | 2 | 2 | 3 |
| C34H67O7P   | 2 | 2 | 1 |
| C33H64NO9P  | 2 | 2 | 1 |
| C35H70N2O8  | 2 | 2 | 1 |
| C34H67O9P   | 3 | 2 | 2 |
| C40H63N5O3  | 1 | 2 | 1 |
| C34H68NO9P  | 3 | 2 | 2 |
| C37H70NO9P  | 3 | 2 | 1 |
| C38H71O8P   | 2 | 2 | 1 |
| C37H72NO7P  | 3 | 2 | 4 |
| C38H75NO8   | 3 | 2 | 4 |
| C47H68O5    | 5 | 2 | 2 |
| C40H73O8P   | 5 | 2 | 3 |
| C36H71O9P   | 5 | 2 | 4 |
| C39H75O9P   | 2 | 2 | 2 |
| C40H79O8P   | 1 | 2 | 1 |
| C40H71O9P   | 1 | 2 | 1 |
| C38H68NO10P | 1 | 2 | 2 |
| C46H66O7    | 5 | 2 | 2 |
| C39H74NO9P  | 3 | 2 | 1 |
| C39H75O10P  | 2 | 2 | 2 |
| C40H75O7P   | 3 | 2 | 2 |
| C38H72NO9P  | 4 | 2 | 1 |
| C37H73O12P  | 2 | 2 | 1 |
| C42H77O8P   | 3 | 2 | 2 |
| C47H74O5    | 1 | 2 | 1 |
| C40H79O8P   | 1 | 2 | 1 |
| C40H72NO9P  | 2 | 2 | 1 |
| C38H74NO9P  | 1 | 2 | 1 |
| C41H76NO8P  | 2 | 2 | 2 |
| C40H81O7P   | 3 | 2 | 1 |
| C37H72NO10P | 2 | 2 | 1 |
| C46H64O8    | 2 | 2 | 1 |
| C38H75O9P   | 4 | 2 | 2 |
| C41H74NO7P  | 2 | 2 | 1 |
| C39H67O10P  | 3 | 2 | 2 |
| C40H66NO10P | 4 | 2 | 2 |
| C39H72NO9P  | 1 | 2 | 2 |
| C40H68NO10P | 1 | 2 | 1 |
| C41H70NO8P  | 3 | 2 | 2 |

|             |   |   |   |
|-------------|---|---|---|
| C42H80NO8P  | 3 | 2 | 1 |
| C41H73NO9   | 3 | 2 | 3 |
| C41H75NO9   | 3 | 2 | 5 |
| C41H76NO8P  | 2 | 2 | 2 |
| C43H72NO7P  | 3 | 2 | 2 |
| C41H80NO8P  | 2 | 2 | 4 |
| C42H72NO8P  | 2 | 2 | 3 |
| C42H88NO6P  | 2 | 2 | 2 |
| C41H77NO10  | 1 | 2 | 1 |
| C41H82NO8P  | 2 | 2 | 1 |
| C12H25NO2   | 2 | 3 | 1 |
| C18H31NO4   | 1 | 3 | 2 |
| C25H49NO4   | 1 | 3 | 1 |
| C21H42NO7P  | 1 | 3 | 1 |
| C23H43NO5   | 1 | 3 | 1 |
| C20H32Br2O2 | 3 | 3 | 4 |
| C23H46NO7P  | 2 | 3 | 1 |
| C36H62O2    | 2 | 3 | 1 |
| C33H66O3    | 2 | 3 | 1 |
| C35H62O3    | 4 | 3 | 4 |
| C36H72O2    | 1 | 3 | 1 |
| C34H69NO4   | 2 | 3 | 1 |
| C28H54NO9P  | 1 | 3 | 1 |
| C38H66O5    | 5 | 3 | 1 |
| C40H80O2    | 3 | 3 | 5 |
| C40H72O4    | 1 | 3 | 1 |
| C32H62NO8P  | 1 | 3 | 2 |
| C29H55O12P  | 2 | 3 | 3 |
| C40H80O3    | 3 | 3 | 3 |
| C33H64NO8P  | 1 | 3 | 1 |
| C42H84O2    | 3 | 3 | 3 |
| C33H64NO8P  | 3 | 3 | 1 |
| C42H84O3    | 2 | 3 | 3 |
| C34H68NO8P  | 4 | 3 | 2 |
| C35H66NO8P  | 5 | 3 | 1 |
| C35H68NO7P  | 3 | 3 | 3 |
| C36H72NO6P  | 2 | 3 | 1 |
| C38H72NO7P  | 3 | 3 | 3 |
| C43H68O4    | 5 | 3 | 3 |
| C36H72O9    | 2 | 3 | 5 |
| C34H67O10P  | 4 | 3 | 1 |
| C39H65O8P   | 1 | 3 | 1 |
| C39H66NO8P  | 3 | 3 | 5 |
| C38H71O7P   | 4 | 3 | 3 |
| C40H69O8P   | 3 | 3 | 1 |
| C45H66O5    | 2 | 3 | 1 |
| C38H73O8P   | 1 | 3 | 1 |

|             |   |   |   |
|-------------|---|---|---|
| C38H76NO7P  | 5 | 3 | 3 |
| C39H79O7P   | 1 | 3 | 2 |
| C36H70NO9P  | 1 | 3 | 1 |
| C39H72NO8P  | 4 | 3 | 6 |
| C40H76NO7P  | 5 | 3 | 1 |
| C40H68NO8P  | 3 | 3 | 1 |
| C44H76O5    | 1 | 3 | 1 |
| C42H81O7P   | 2 | 3 | 1 |
| C42H67O8P   | 4 | 3 | 1 |
| C41H66NO8P  | 3 | 3 | 5 |
| C38H66NO8P  | 3 | 3 | 3 |
| C39H74NO7P  | 3 | 3 | 2 |
| C39H76NO7P  | 1 | 3 | 4 |
| C40H79NO8   | 3 | 3 | 2 |
| C41H73O7P   | 1 | 3 | 1 |
| C41H75O7P   | 4 | 3 | 5 |
| C46H78O5    | 2 | 3 | 1 |
| C39H78NO8P  | 2 | 3 | 2 |
| C4H8O4      | 5 | 4 | 6 |
| C10H10O4    | 5 | 4 | 5 |
| C18H39NO3   | 3 | 4 | 4 |
| C21H40O2    | 4 | 4 | 2 |
| C21H34O5    | 2 | 4 | 2 |
| C24H38O4    | 3 | 4 | 5 |
| C21H37O7P   | 2 | 4 | 1 |
| C19H39O7P   | 4 | 4 | 2 |
| C21H39O6P   | 2 | 4 | 1 |
| C28H41NO3   | 3 | 4 | 1 |
| C28H50O5    | 4 | 4 | 3 |
| C23H40NO7P  | 4 | 4 | 1 |
| C35H60O4    | 4 | 4 | 3 |
| C32H65NO3   | 2 | 4 | 1 |
| C35H62O5    | 4 | 4 | 1 |
| C28H53O9P   | 2 | 4 | 3 |
| C35H66O5    | 6 | 4 | 5 |
| C37H68O5    | 3 | 4 | 1 |
| C40H56O2    | 5 | 4 | 5 |
| C34H56O9    | 2 | 4 | 3 |
| C40H78O2    | 2 | 4 | 4 |
| C39H66O5    | 4 | 4 | 2 |
| C37H70O5    | 5 | 4 | 5 |
| C30H58NO10P | 2 | 4 | 1 |
| C34H66NO9P  | 3 | 4 | 2 |
| C36H66NO8P  | 5 | 4 | 2 |
| C36H67O8P   | 4 | 4 | 1 |
| C40H73N3O4  | 4 | 4 | 2 |
| C36H70O9    | 2 | 4 | 4 |

|             |   |   |   |
|-------------|---|---|---|
| C36H74NO7P  | 3 | 4 | 2 |
| C35H71O9P   | 3 | 4 | 4 |
| C34H59NO13  | 1 | 4 | 1 |
| C36H68NO9P  | 5 | 4 | 4 |
| C38H74O9    | 4 | 4 | 6 |
| C38H78NO7P  | 3 | 4 | 2 |
| C39H71O7P   | 3 | 4 | 1 |
| C39H73O8P   | 3 | 4 | 3 |
| C37H70NO9P  | 2 | 4 | 3 |
| C38H79N2O6P | 3 | 4 | 2 |
| C36H70NO10P | 4 | 4 | 4 |
| C37H74NO9P  | 3 | 4 | 5 |
| C46H80O5    | 1 | 4 | 1 |
| C18H33NO    | 3 | 5 | 1 |
| C18H35NO    | 4 | 5 | 2 |
| C19H37O6P   | 5 | 5 | 3 |
| C26H39NO3   | 4 | 5 | 4 |
| C26H39F3O2  | 5 | 5 | 6 |
| C26H42O4    | 6 | 5 | 6 |
| C21H44NO7P  | 2 | 5 | 1 |
| C23H42NO7P  | 4 | 5 | 1 |
| C29H46O7    | 3 | 5 | 4 |
| C27H48O7    | 1 | 5 | 4 |
| C35H62O4    | 6 | 5 | 6 |
| C35H64O5    | 4 | 5 | 1 |
| C37H64O5    | 6 | 5 | 5 |
| C37H66O5    | 5 | 5 | 1 |
| C30H58NO8P  | 3 | 5 | 4 |
| C35H62NO8P  | 4 | 5 | 2 |
| C35H64NO8P  | 5 | 5 | 4 |
| C41H64O4    | 3 | 5 | 2 |
| C35H68NO8P  | 5 | 5 | 6 |
| C37H63O8P   | 5 | 5 | 4 |
| C35H65O8P   | 5 | 5 | 4 |
| C36H70NO8P  | 4 | 5 | 3 |
| C38H65O8P   | 4 | 5 | 1 |
| C37H64NO8P  | 5 | 5 | 2 |
| C37H74NO8P  | 5 | 5 | 6 |
| C38H70NO8P  | 5 | 5 | 5 |
| C37H65O10P  | 2 | 5 | 1 |
| C37H67O10P  | 3 | 5 | 2 |
| C36H69O10P  | 4 | 5 | 4 |
| C38H76O9    | 3 | 5 | 6 |
| C36H73O9P   | 4 | 5 | 5 |
| C19H36O3    | 6 | 6 | 4 |
| C35H66O4    | 6 | 6 | 6 |
| C36H64O4    | 6 | 6 | 6 |

|              |   |   |   |
|--------------|---|---|---|
| C39H70O4     | 6 | 6 | 6 |
| C39H68O5     | 5 | 6 | 5 |
| C33H66NO8P   | 3 | 6 | 1 |
| C35H61O8P    | 4 | 6 | 3 |
| C33H63O8P    | 5 | 6 | 3 |
| C35H63O8P    | 5 | 6 | 3 |
| C33H65O8P    | 5 | 6 | 3 |
| C35H70NO8P   | 5 | 6 | 3 |
| C37H71NO6    | 5 | 6 | 2 |
| C37H65O8P    | 6 | 6 | 6 |
| C35H67O8P    | 6 | 6 | 6 |
| C37H67O8P    | 5 | 6 | 5 |
| C35H69O8P    | 5 | 6 | 5 |
| C38H67O8P    | 6 | 6 | 6 |
| C43H64O5     | 4 | 6 | 6 |
| C36H69O8P    | 4 | 6 | 6 |
| C37H66NO8P   | 6 | 6 | 6 |
| C37H68NO8P   | 5 | 6 | 6 |
| C37H70NO8P   | 5 | 6 | 6 |
| C37H72NO8P   | 6 | 6 | 6 |
| C34H69O9P    | 5 | 6 | 6 |
| C37H69O8P    | 5 | 6 | 6 |
| C37H71O8P    | 6 | 6 | 6 |
| C35H69O10P   | 5 | 6 | 1 |
| C84H152N2O37 | 1 | 1 | 1 |
| C76H139NO33  | 1 | 1 | 1 |
| C85H151N3O36 | 1 | 1 | 1 |
| C31H60O5     | 1 | 1 | 1 |
| C26H52O3     | 1 | 1 | 1 |
| C25H50O3     | 1 | 1 | 1 |
| C26H52O7     | 1 | 1 | 1 |
| C25H50O7     | 1 | 1 | 1 |
| C30H60O3     | 1 | 1 | 1 |
| C14H30O2     | 1 | 1 | 1 |
| C45H88NO10P  | 1 | 1 | 1 |
| C13H26O3     | 1 | 1 | 1 |
| C23H46N4O3   | 1 | 1 | 1 |
| C57H92O27    | 1 | 1 | 1 |
| C43H82NO10P  | 1 | 1 | 1 |
| C27H45NO4    | 1 | 1 | 1 |
| C25H41NO4    | 1 | 1 | 1 |
| C45H76O5     | 1 | 1 | 1 |
| C18H35NO2    | 1 | 1 | 1 |
| C18H39NO2    | 1 | 1 | 1 |
| C18H35NO3    | 1 | 1 | 1 |
| C24H39NO3    | 1 | 1 | 1 |
| C16H27NO4    | 1 | 1 | 1 |

|           |   |   |   |
|-----------|---|---|---|
| C12H25NO  | 1 | 1 | 1 |
| C19H37NO2 | 1 | 1 | 1 |
| C37H71NO6 | 1 | 1 | 1 |
| C24H45NO3 | 1 | 1 | 1 |
| C21H41NO3 | 1 | 1 | 1 |
| C24H41NO3 | 1 | 1 | 1 |
| C25H41NO3 | 1 | 1 | 1 |
| C17H35NO2 | 1 | 1 | 1 |
| C19H35NO2 | 1 | 1 | 1 |
| C20H43NO2 | 1 | 1 | 1 |
| C25H51NO2 | 1 | 1 | 1 |
| C26H51NO2 | 1 | 1 | 1 |
| C18H31NO4 | 1 | 1 | 1 |
| C24H39NO4 | 1 | 1 | 1 |
| C26H43NO4 | 1 | 1 | 1 |
| C16H33NO2 | 1 | 1 | 1 |
| C17H33NO2 | 1 | 1 | 1 |
| C20H33NO2 | 1 | 1 | 1 |
| C22H45NO2 | 1 | 1 | 1 |
| C25H45NO2 | 1 | 1 | 1 |
| C24H49NO2 | 1 | 1 | 1 |
| C16H33NO3 | 1 | 1 | 1 |
| C16H35NO2 | 1 | 1 | 1 |
| C24H39NO2 | 1 | 1 | 1 |
| C24H47NO2 | 1 | 1 | 1 |
| C26H43NO3 | 1 | 1 | 1 |
| C22H35NO4 | 1 | 1 | 1 |
| C23H39NO4 | 1 | 1 | 1 |
| C20H33NO  | 1 | 1 | 1 |
| C23H43NO5 | 1 | 1 | 1 |
| C18H37NO2 | 1 | 1 | 1 |
| C24H41NO2 | 1 | 1 | 1 |
| C18H29NO3 | 1 | 1 | 1 |
| C23H45NO3 | 1 | 1 | 1 |
| C23H37NO3 | 1 | 1 | 1 |
| C23H37NO4 | 1 | 1 | 1 |
| C20H35NO2 | 1 | 1 | 1 |
| C20H39NO2 | 1 | 1 | 1 |
| C22H35NO2 | 1 | 1 | 1 |
| C23H39NO2 | 1 | 1 | 1 |
| C23H47NO2 | 1 | 1 | 1 |
| C22H35NO3 | 1 | 1 | 1 |
| C21H39NO3 | 1 | 1 | 1 |
| C23H39NO3 | 1 | 1 | 1 |
| C21H44NO2 | 1 | 1 | 1 |
| C26H53NO2 | 1 | 1 | 1 |
| C20H37NO3 | 1 | 1 | 1 |



|              |   |   |   |
|--------------|---|---|---|
| C18H33NO4    | 1 | 1 | 1 |
| C22H37NO4    | 1 | 1 | 1 |
| C16H27NO2    | 1 | 1 | 1 |
| C27H43NO3    | 1 | 1 | 1 |
| C19H37NO3    | 1 | 1 | 1 |
| C69H120O6    | 1 | 1 | 1 |
| C18H29N      | 1 | 1 | 1 |
| C23H49N2O5P  | 1 | 1 | 1 |
| C45H86NO10P  | 1 | 1 | 1 |
| C44H84NO10P  | 1 | 1 | 1 |
| C12H23BrO2   | 1 | 1 | 1 |
| C41H79N2O6P  | 1 | 1 | 1 |
| C82H144N4O39 | 1 | 1 | 1 |
| C38H77O9P    | 1 | 1 | 1 |
| C35H71O9P    | 1 | 1 | 1 |
| C34H68O3     | 1 | 1 | 1 |
| C37H75O9P    | 1 | 1 | 1 |
| C21H46NO6P   | 1 | 1 | 1 |
| C36H73O9P    | 1 | 1 | 1 |
| C38H76NO9P   | 1 | 1 | 1 |
| C22H46NO6P   | 1 | 1 | 1 |
| C69H126N2O26 | 1 | 1 | 1 |
| C48H84NO9P   | 1 | 1 | 1 |
| C17H28O      | 1 | 1 | 1 |
| C46H78NO9P   | 1 | 1 | 1 |
| C43H68O5     | 1 | 1 | 1 |
| C41H66O5     | 1 | 1 | 1 |
| C42H68O5     | 1 | 1 | 1 |
| C28H41NO3    | 1 | 1 | 1 |
| C29H43NO2    | 1 | 1 | 1 |
| C28H41NO2    | 1 | 1 | 1 |
| C48H82NO9P   | 1 | 1 | 1 |
| C18H36O2S    | 1 | 1 | 1 |
| C26H44FNO    | 1 | 1 | 1 |
| C19H30O5S    | 1 | 1 | 1 |
| C27H46FNO    | 1 | 1 | 1 |
| C22H36FNO    | 1 | 1 | 1 |
| C22H34O4S    | 1 | 1 | 1 |
| C23H38FNO    | 1 | 1 | 1 |
| C28H48FNO    | 1 | 1 | 1 |
| C40H76NO7P   | 1 | 1 | 1 |
| C77H137N3O37 | 1 | 1 | 1 |
| C88H158N2O43 | 1 | 1 | 1 |
| C25H49O7P    | 1 | 1 | 1 |
| C37H70NO8P   | 1 | 1 | 1 |
| C26H53O8P    | 1 | 1 | 1 |
| C24H51O8P    | 1 | 1 | 1 |

|             |   |   |   |
|-------------|---|---|---|
| C26H55O8P   | 1 | 1 | 1 |
| C23H47O9P   | 1 | 1 | 1 |
| C50H75O10P  | 1 | 1 | 1 |
| C35H68NO8P  | 1 | 1 | 1 |
| C26H39N3O3  | 1 | 1 | 1 |
| C39H73O10P  | 1 | 1 | 1 |
| C38H71O10P  | 1 | 1 | 1 |
| C27H43N3O   | 1 | 1 | 1 |
| C36H69O10P  | 1 | 1 | 1 |
| C28H39N3O3  | 1 | 1 | 1 |
| C39H73O8P   | 1 | 1 | 1 |
| C37H71O10P  | 1 | 1 | 1 |
| C39H75O10P  | 1 | 1 | 1 |
| C40H75O9P   | 1 | 1 | 1 |
| C39H74NO8P  | 1 | 1 | 1 |
| C36H69O9P   | 1 | 1 | 1 |
| C35H64O5    | 1 | 1 | 1 |
| C36H71O10P  | 1 | 1 | 1 |
| C25H42O6    | 1 | 1 | 1 |
| C22H34O7    | 1 | 1 | 1 |
| C20H38O5    | 1 | 1 | 1 |
| C18H32O2    | 1 | 1 | 1 |
| C40H74NO10P | 1 | 1 | 1 |
| C18H16O3    | 1 | 1 | 1 |
| C25H42O     | 1 | 1 | 1 |
| C12H16O5    | 1 | 1 | 1 |
| C29H36O5    | 1 | 1 | 1 |
| C15H26O2    | 1 | 1 | 1 |
| C17H22O2    | 1 | 1 | 1 |
| C29H54O2    | 1 | 1 | 1 |
| C24H40O6    | 1 | 1 | 1 |
| C27H40O6    | 1 | 1 | 1 |
| C17H22O3    | 1 | 1 | 1 |
| C15H22O4    | 1 | 1 | 1 |
| C16H22O4    | 1 | 1 | 1 |
| C26H42O5    | 1 | 1 | 1 |
| C22H36O2    | 1 | 1 | 1 |
| C34H56O2    | 1 | 1 | 1 |
| C25H40O2    | 1 | 1 | 1 |
| C16H32O3    | 1 | 1 | 1 |
| C17H28O3    | 1 | 1 | 1 |
| C21H32O3    | 1 | 1 | 1 |
| C20H24O4    | 1 | 1 | 1 |
| C18H30O     | 1 | 1 | 1 |
| C18H22O2    | 1 | 1 | 1 |
| C17H34O2    | 1 | 1 | 1 |
| C22H34O2    | 1 | 1 | 1 |

|             |   |   |   |
|-------------|---|---|---|
| C22H42O2    | 1 | 1 | 1 |
| C23H38O2    | 1 | 1 | 1 |
| C38H72NO10P | 1 | 1 | 1 |
| C18H28O6    | 1 | 1 | 1 |
| C17H26O3    | 1 | 1 | 1 |
| C21H30O3    | 1 | 1 | 1 |
| C28H50O3    | 1 | 1 | 1 |
| C27H38O3    | 1 | 1 | 1 |
| C25H32O7    | 1 | 1 | 1 |
| C35H69O8P   | 1 | 1 | 1 |
| C16H30O4    | 1 | 1 | 1 |
| C18H30O4    | 1 | 1 | 1 |
| C17H26O5    | 1 | 1 | 1 |
| C19H22O5    | 1 | 1 | 1 |
| C18H30O5    | 1 | 1 | 1 |
| C28H38O5    | 1 | 1 | 1 |
| C19H28O2    | 1 | 1 | 1 |
| C17H32O2    | 1 | 1 | 1 |
| C22H32O2    | 1 | 1 | 1 |
| C23H36O2    | 1 | 1 | 1 |
| C26H44O2    | 1 | 1 | 1 |
| C23H40O2    | 1 | 1 | 1 |
| C19H26O6    | 1 | 1 | 1 |
| C32H50O6    | 1 | 1 | 1 |
| C20H34O6    | 1 | 1 | 1 |
| C22H30O6    | 1 | 1 | 1 |
| C26H34O6    | 1 | 1 | 1 |
| C17H24O3    | 1 | 1 | 1 |
| C18H20O3    | 1 | 1 | 1 |
| C17H32O3    | 1 | 1 | 1 |
| C20H32O3    | 1 | 1 | 1 |
| C21H28O3    | 1 | 1 | 1 |
| C22H32O3    | 1 | 1 | 1 |
| C23H44O3    | 1 | 1 | 1 |
| C22H30O7    | 1 | 1 | 1 |
| C38H71O8P   | 1 | 1 | 1 |
| C20H28O4    | 1 | 1 | 1 |
| C21H32O4    | 1 | 1 | 1 |
| C25H40O4    | 1 | 1 | 1 |
| C29H40O4    | 1 | 1 | 1 |
| C27H42O     | 1 | 1 | 1 |
| C20H26O8    | 1 | 1 | 1 |
| C15H20O5    | 1 | 1 | 1 |
| C16H28O5    | 1 | 1 | 1 |
| C18H28O5    | 1 | 1 | 1 |
| C18H32O5    | 1 | 1 | 1 |
| C20H32O5    | 1 | 1 | 1 |

|           |   |   |   |
|-----------|---|---|---|
| C19H26O2  | 1 | 1 | 1 |
| C18H30O2  | 1 | 1 | 1 |
| C18H34O2  | 1 | 1 | 1 |
| C19H34O2  | 1 | 1 | 1 |
| C19H38O2  | 1 | 1 | 1 |
| C22H38O2  | 1 | 1 | 1 |
| C24H34O2  | 1 | 1 | 1 |
| C28H50O2  | 1 | 1 | 1 |
| C29H50O2  | 1 | 1 | 1 |
| C23H42O2  | 1 | 1 | 1 |
| C24H46O2  | 1 | 1 | 1 |
| C28H42O2  | 1 | 1 | 1 |
| C29H58O2  | 1 | 1 | 1 |
| C31H46O2  | 1 | 1 | 1 |
| C19H20O6  | 1 | 1 | 1 |
| C20H32O6  | 1 | 1 | 1 |
| C18H22O3  | 1 | 1 | 1 |
| C18H30O3  | 1 | 1 | 1 |
| C20H34O3  | 1 | 1 | 1 |
| C20H38O3  | 1 | 1 | 1 |
| C21H34O3  | 1 | 1 | 1 |
| C23H30O3  | 1 | 1 | 1 |
| C23H34O3  | 1 | 1 | 1 |
| C29H46O3  | 1 | 1 | 1 |
| C36H69O8P | 1 | 1 | 1 |
| C17H22O4  | 1 | 1 | 1 |
| C18H22O4  | 1 | 1 | 1 |
| C20H30O4  | 1 | 1 | 1 |
| C20H34O4  | 1 | 1 | 1 |
| C21H34O4  | 1 | 1 | 1 |
| C25H42O4  | 1 | 1 | 1 |
| C27H38O4  | 1 | 1 | 1 |
| C27H46O4  | 1 | 1 | 1 |
| C16H14O5  | 1 | 1 | 1 |
| C19H30O5  | 1 | 1 | 1 |
| C20H30O5  | 1 | 1 | 1 |
| C18H34O5  | 1 | 1 | 1 |
| C20H34O5  | 1 | 1 | 1 |
| C21H34O5  | 1 | 1 | 1 |
| C24H38O5  | 1 | 1 | 1 |
| C29H38O5  | 1 | 1 | 1 |
| C20H24O2  | 1 | 1 | 1 |
| C20H28O2  | 1 | 1 | 1 |
| C22H28O2  | 1 | 1 | 1 |
| C18H36O2  | 1 | 1 | 1 |
| C20H36O2  | 1 | 1 | 1 |
| C21H36O2  | 1 | 1 | 1 |

|          |   |   |   |
|----------|---|---|---|
| C19H32O2 | 1 | 1 | 1 |
| C20H40O2 | 1 | 1 | 1 |
| C21H40O2 | 1 | 1 | 1 |
| C22H40O2 | 1 | 1 | 1 |
| C22H44O2 | 1 | 1 | 1 |
| C23H44O2 | 1 | 1 | 1 |
| C24H48O2 | 1 | 1 | 1 |
| C27H48O2 | 1 | 1 | 1 |
| C29H44O2 | 1 | 1 | 1 |
| C19H22O6 | 1 | 1 | 1 |
| C23H30O6 | 1 | 1 | 1 |
| C23H34O6 | 1 | 1 | 1 |
| C18H24O3 | 1 | 1 | 1 |
| C19H24O3 | 1 | 1 | 1 |
| C18H28O3 | 1 | 1 | 1 |
| C19H28O3 | 1 | 1 | 1 |
| C20H36O3 | 1 | 1 | 1 |
| C23H32O3 | 1 | 1 | 1 |
| C24H36O3 | 1 | 1 | 1 |
| C26H44O3 | 1 | 1 | 1 |
| C31H44O3 | 1 | 1 | 1 |
| C21H40O3 | 1 | 1 | 1 |
| C23H40O3 | 1 | 1 | 1 |
| C19H24O4 | 1 | 1 | 1 |
| C17H28O4 | 1 | 1 | 1 |
| C19H28O4 | 1 | 1 | 1 |
| C19H32O4 | 1 | 1 | 1 |
| C20H32O4 | 1 | 1 | 1 |
| C20H36O4 | 1 | 1 | 1 |
| C21H28O4 | 1 | 1 | 1 |
| C27H40O4 | 1 | 1 | 1 |
| C27H44O4 | 1 | 1 | 1 |
| C30H44O4 | 1 | 1 | 1 |
| C19H24O5 | 1 | 1 | 1 |
| C20H28O5 | 1 | 1 | 1 |
| C20H36O5 | 1 | 1 | 1 |
| C23H32O5 | 1 | 1 | 1 |
| C24H32O5 | 1 | 1 | 1 |
| C20H26O2 | 1 | 1 | 1 |
| C21H38O2 | 1 | 1 | 1 |
| C26H38O2 | 1 | 1 | 1 |
| C19H30O2 | 1 | 1 | 1 |
| C20H34O2 | 1 | 1 | 1 |
| C21H30O2 | 1 | 1 | 1 |
| C21H42O2 | 1 | 1 | 1 |
| C23H34O2 | 1 | 1 | 1 |
| C23H46O2 | 1 | 1 | 1 |

|              |   |   |   |
|--------------|---|---|---|
| C25H42O2     | 1 | 1 | 1 |
| C27H50O2     | 1 | 1 | 1 |
| C74H133N3O29 | 1 | 1 | 1 |
| C19H24O6     | 1 | 1 | 1 |
| C19H32O6     | 1 | 1 | 1 |
| C23H32O6     | 1 | 1 | 1 |
| C18H26O3     | 1 | 1 | 1 |
| C19H26O3     | 1 | 1 | 1 |
| C17H34O3     | 1 | 1 | 1 |
| C18H34O3     | 1 | 1 | 1 |
| C19H30O3     | 1 | 1 | 1 |
| C22H34O3     | 1 | 1 | 1 |
| C28H46O3     | 1 | 1 | 1 |
| C35H62O3     | 1 | 1 | 1 |
| C22H42O3     | 1 | 1 | 1 |
| C25H42O3     | 1 | 1 | 1 |
| C26H42O3     | 1 | 1 | 1 |
| C27H42O3     | 1 | 1 | 1 |
| C28H42O3     | 1 | 1 | 1 |
| C19H24O7     | 1 | 1 | 1 |
| C19H22O4     | 1 | 1 | 1 |
| C17H30O4     | 1 | 1 | 1 |
| C20H38O4     | 1 | 1 | 1 |
| C21H30O4     | 1 | 1 | 1 |
| C24H30O4     | 1 | 1 | 1 |
| C24H38O4     | 1 | 1 | 1 |
| C26H42O4     | 1 | 1 | 1 |
| C27H42O4     | 1 | 1 | 1 |
| C28H42O4     | 1 | 1 | 1 |
| C18H34O4     | 1 | 1 | 1 |
| C25H40O      | 1 | 1 | 1 |
| C17H22O5     | 1 | 1 | 1 |
| C20H26O5     | 1 | 1 | 1 |
| C23H38O5     | 1 | 1 | 1 |
| C25H42O5     | 1 | 1 | 1 |
| C21H28O2     | 1 | 1 | 1 |
| C24H28O2     | 1 | 1 | 1 |
| C21H32O2     | 1 | 1 | 1 |
| C24H36O2     | 1 | 1 | 1 |
| C28H48O2     | 1 | 1 | 1 |
| C28H52O2     | 1 | 1 | 1 |
| C29H48O2     | 1 | 1 | 1 |
| C29H52O2     | 1 | 1 | 1 |
| C31H48O2     | 1 | 1 | 1 |
| C27H40O2     | 1 | 1 | 1 |
| C29H40O2     | 1 | 1 | 1 |
| C20H30O6     | 1 | 1 | 1 |

|            |   |   |   |
|------------|---|---|---|
| C18H32O3   | 1 | 1 | 1 |
| C19H32O3   | 1 | 1 | 1 |
| C19H36O3   | 1 | 1 | 1 |
| C20H28O3   | 1 | 1 | 1 |
| C20H40O3   | 1 | 1 | 1 |
| C22H44O3   | 1 | 1 | 1 |
| C27H40O3   | 1 | 1 | 1 |
| C27H48O3   | 1 | 1 | 1 |
| C28H44O3   | 1 | 1 | 1 |
| C28H48O3   | 1 | 1 | 1 |
| C32H48O3   | 1 | 1 | 1 |
| C19H22O7   | 1 | 1 | 1 |
| C20H26O7   | 1 | 1 | 1 |
| C28H38O7   | 1 | 1 | 1 |
| C38H72NO8P | 1 | 1 | 1 |
| C18H32O4   | 1 | 1 | 1 |
| C24H28O4   | 1 | 1 | 1 |
| C26H32O4   | 1 | 1 | 1 |
| C26H44O4   | 1 | 1 | 1 |
| C31H44O4   | 1 | 1 | 1 |
| C18H36O4   | 1 | 1 | 1 |
| C21H40O4   | 1 | 1 | 1 |
| C24H40O4   | 1 | 1 | 1 |
| C22H38NO5P | 1 | 1 | 1 |
| C16H34NO5P | 1 | 1 | 1 |
| C37H72NO9P | 1 | 1 | 1 |
| C16H24O5   | 1 | 1 | 1 |
| C22H28O5   | 1 | 1 | 1 |
| C24H36O5   | 1 | 1 | 1 |
| C26H40O5   | 1 | 1 | 1 |
| C19H37O6P  | 1 | 1 | 1 |
| C20H30O2   | 1 | 1 | 1 |
| C20H38O2   | 1 | 1 | 1 |
| C21H34O2   | 1 | 1 | 1 |
| C26H46O2   | 1 | 1 | 1 |
| C27H38O2   | 1 | 1 | 1 |
| C27H46O2   | 1 | 1 | 1 |
| C28H46O2   | 1 | 1 | 1 |
| C27H42O2   | 1 | 1 | 1 |
| C20H28O6   | 1 | 1 | 1 |
| C22H28O6   | 1 | 1 | 1 |
| C25H40O6   | 1 | 1 | 1 |
| C23H46NO7P | 1 | 1 | 1 |
| C20H26O3   | 1 | 1 | 1 |
| C24H38O3   | 1 | 1 | 1 |
| C27H46O3   | 1 | 1 | 1 |
| C28H38O3   | 1 | 1 | 1 |

|            |   |   |   |
|------------|---|---|---|
| C31H46O3   | 1 | 1 | 1 |
| C32H50O3   | 1 | 1 | 1 |
| C19H20O7   | 1 | 1 | 1 |
| C33H66NO8P | 1 | 1 | 1 |
| C33H65O8P  | 1 | 1 | 1 |
| C22H34O4   | 1 | 1 | 1 |
| C23H34O4   | 1 | 1 | 1 |
| C26H44O    | 1 | 1 | 1 |
| C15H22O5   | 1 | 1 | 1 |
| C16H26O5   | 1 | 1 | 1 |
| C23H30O5   | 1 | 1 | 1 |
| C24H30O5   | 1 | 1 | 1 |
| C22H24O2   | 1 | 1 | 1 |
| C20H32O2   | 1 | 1 | 1 |
| C25H32O2   | 1 | 1 | 1 |
| C27H52O2   | 1 | 1 | 1 |
| C30H52O2   | 1 | 1 | 1 |
| C26H40O2   | 1 | 1 | 1 |
| C27H44O2   | 1 | 1 | 1 |
| C28H40O2   | 1 | 1 | 1 |
| C24H38O6   | 1 | 1 | 1 |
| C29H42O6   | 1 | 1 | 1 |
| C18H36O3   | 1 | 1 | 1 |
| C26H48O3   | 1 | 1 | 1 |
| C27H44O3   | 1 | 1 | 1 |
| C39H76NO8P | 1 | 1 | 1 |
| C17H32O4   | 1 | 1 | 1 |
| C26H40O4   | 1 | 1 | 1 |
| C38H72NO9P | 1 | 1 | 1 |
| C30H44O5   | 1 | 1 | 1 |
| C25H36O5   | 1 | 1 | 1 |
| C35H58O4   | 1 | 1 | 1 |
| C39H73O9P  | 1 | 1 | 1 |
| C31H42O5   | 1 | 1 | 1 |
| C26H48O2   | 1 | 1 | 1 |
| C30H42O6   | 1 | 1 | 1 |
| C33H48O3   | 1 | 1 | 1 |
| C35H68NO9P | 1 | 1 | 1 |
| C34H58O2   | 1 | 1 | 1 |
| C30H44O6   | 1 | 1 | 1 |
| C21H42NO7P | 1 | 1 | 1 |
| C35H58O3   | 1 | 1 | 1 |
| C10H18O4   | 1 | 1 | 1 |
| C32H46O4   | 1 | 1 | 1 |
| C36H70NO9P | 1 | 1 | 1 |
| C36H64O2   | 1 | 1 | 1 |
| C36H70O2   | 1 | 1 | 1 |



|              |   |   |   |
|--------------|---|---|---|
| C28H4007     | 1 | 1 | 1 |
| C34H6002     | 1 | 1 | 1 |
| C19H3907P    | 1 | 1 | 1 |
| C35H6003     | 1 | 1 | 1 |
| C35H6004     | 1 | 1 | 1 |
| C39H72N09P   | 1 | 1 | 1 |
| C31H4806     | 1 | 1 | 1 |
| C33H5206     | 1 | 1 | 1 |
| C34H5004     | 1 | 1 | 1 |
| C33H5004     | 1 | 1 | 1 |
| C35H6604     | 1 | 1 | 1 |
| C35H6802     | 1 | 1 | 1 |
| C39H72N08P   | 1 | 1 | 1 |
| C32H4805     | 1 | 1 | 1 |
| C19H3803     | 1 | 1 | 1 |
| C40H74N09P   | 1 | 1 | 1 |
| C39H74N010P  | 1 | 1 | 1 |
| C40H76N08P   | 1 | 1 | 1 |
| C28H43F03    | 1 | 1 | 1 |
| C32H4605     | 1 | 1 | 1 |
| C16H2803     | 1 | 1 | 1 |
| C27H43F03    | 1 | 1 | 1 |
| C23H31F06    | 1 | 1 | 1 |
| C27H41F03    | 1 | 1 | 1 |
| C28H45F03    | 1 | 1 | 1 |
| C24H31F06    | 1 | 1 | 1 |
| C40H75O10P   | 1 | 1 | 1 |
| C45H6605     | 1 | 1 | 1 |
| C43H6405     | 1 | 1 | 1 |
| C46H6806     | 1 | 1 | 1 |
| C66H122N2O23 | 1 | 1 | 1 |
| C84H151N3O36 | 1 | 1 | 1 |
| C16H31O5     | 1 | 1 | 1 |
| C80H128O14   | 2 | 1 | 1 |
| C66H122O6    | 2 | 1 | 1 |
| C37H71O9P    | 2 | 1 | 1 |
| C26H5004     | 2 | 1 | 1 |
| C23H3806     | 2 | 1 | 1 |
| C22H42O4     | 2 | 1 | 1 |
| C22H3606     | 2 | 1 | 1 |
| C22H3803     | 2 | 1 | 1 |
| C19H3006     | 2 | 1 | 1 |
| C17H38N05P   | 2 | 1 | 1 |
| C88H156N4O38 | 2 | 1 | 1 |
| C40H78N08P   | 2 | 1 | 1 |
| C41H78N08P   | 2 | 1 | 1 |
| C20H3003     | 2 | 1 | 1 |

Negative

|                |   |   |   |
|----------------|---|---|---|
| C27H45NO3      | 2 | 1 | 1 |
| C84H151NO38    | 2 | 1 | 1 |
| C19H34O4       | 2 | 1 | 1 |
| C82H150N2O31   | 2 | 1 | 1 |
| C41H80NO10P    | 2 | 1 | 1 |
| C23H38N7O17P3S | 2 | 1 | 1 |
| C86H152N4O41   | 2 | 1 | 1 |
| C83H147N3O40   | 2 | 1 | 1 |
| C30H54O2       | 2 | 1 | 1 |
| C28H46O4       | 2 | 1 | 1 |
| C30H60O2       | 2 | 1 | 1 |
| C31H48O3       | 2 | 1 | 1 |
| C30H50O2       | 2 | 1 | 1 |
| C30H58O2       | 2 | 1 | 1 |
| C27H48O6       | 2 | 1 | 1 |
| C29H50O3       | 2 | 1 | 1 |
| C28H56O2       | 2 | 1 | 1 |
| C28H52O3       | 2 | 1 | 1 |
| C29H44O4       | 2 | 1 | 1 |
| C28H54O2       | 2 | 1 | 1 |
| C29H46O2       | 2 | 1 | 1 |
| C23H36O6       | 2 | 1 | 1 |
| C24H32O6       | 2 | 1 | 1 |
| C29H42O3       | 2 | 1 | 1 |
| C27H42O5       | 2 | 1 | 1 |
| C31H52O2       | 2 | 1 | 1 |
| C28H40O3       | 2 | 1 | 1 |
| C91H160N4O38   | 2 | 1 | 1 |
| C30H48O3       | 2 | 1 | 1 |
| C30H48O4       | 2 | 1 | 1 |
| C30H48O2       | 2 | 1 | 1 |
| C25H30O4       | 2 | 1 | 1 |
| C17H36NO5P     | 2 | 1 | 1 |
| C37H74NO9P     | 2 | 1 | 1 |
| C32H52O2       | 2 | 1 | 1 |
| C32H50O4       | 2 | 1 | 1 |
| C27H42O6       | 2 | 1 | 1 |
| C21H44NO7P     | 2 | 1 | 1 |
| C40H77O10P     | 2 | 1 | 1 |
| C22H30O3       | 2 | 1 | 1 |
| C24H40O5       | 3 | 1 | 1 |
| C86H155N3O37   | 3 | 1 | 1 |
| C71H130N2O26   | 1 | 2 | 1 |
| C83H148N4O36   | 1 | 2 | 1 |
| C23H46O3       | 1 | 2 | 1 |
| C16H36NO5P     | 1 | 2 | 1 |
| C46H89O12P     | 1 | 2 | 1 |

|              |   |   |   |
|--------------|---|---|---|
| C22H37NO3    | 1 | 2 | 1 |
| C47H86NO10P  | 1 | 2 | 1 |
| C68H130O6    | 1 | 2 | 1 |
| C90H160N4O39 | 1 | 2 | 1 |
| C45H86NO9P   | 1 | 2 | 1 |
| C47H83O8P    | 1 | 2 | 1 |
| C72H133NO27  | 1 | 2 | 1 |
| C80H141N3O39 | 1 | 2 | 1 |
| C27H44O7     | 1 | 2 | 1 |
| C43H74NO7P   | 1 | 2 | 1 |
| C88H159N3O36 | 1 | 2 | 1 |
| C48H82NO8P   | 1 | 2 | 1 |
| C82H148N4O33 | 1 | 2 | 1 |
| C45H85O12P   | 1 | 2 | 1 |
| C83H146N4O37 | 1 | 2 | 1 |
| C88H158N2O37 | 1 | 2 | 1 |
| C42H79O10P   | 1 | 2 | 1 |
| C24H41N3O3   | 1 | 2 | 1 |
| C35H67O8P    | 1 | 2 | 1 |
| C19H36O5     | 1 | 2 | 1 |
| C15H22O2     | 1 | 2 | 1 |
| C16H22O2     | 1 | 2 | 1 |
| C24H38O2     | 1 | 2 | 1 |
| C38H75O10P   | 1 | 2 | 1 |
| C17H32O      | 1 | 2 | 1 |
| C24H34O5     | 1 | 2 | 1 |
| C18H30O6     | 1 | 2 | 1 |
| C25H46O2     | 1 | 2 | 1 |
| C21H28O6     | 1 | 2 | 1 |
| C23H38O3     | 1 | 2 | 1 |
| C22H30O4     | 1 | 2 | 1 |
| C23H38O4     | 1 | 2 | 1 |
| C25H38O4     | 1 | 2 | 1 |
| C25H48O2     | 1 | 2 | 1 |
| C21H30O6     | 1 | 2 | 1 |
| C25H40O3     | 1 | 2 | 1 |
| C21H28O5     | 1 | 2 | 1 |
| C21H32O5     | 1 | 2 | 1 |
| C22H32O5     | 1 | 2 | 1 |
| C27H40O5     | 1 | 2 | 1 |
| C26H42O2     | 1 | 2 | 1 |
| C24H42O3     | 1 | 2 | 1 |
| C21H26O5     | 1 | 2 | 1 |
| C21H30O5     | 1 | 2 | 1 |
| C23H34O5     | 1 | 2 | 1 |
| C24H44O2     | 1 | 2 | 1 |
| C26H52O2     | 1 | 2 | 1 |

|              |   |   |   |
|--------------|---|---|---|
| C38H73O10P   | 1 | 2 | 1 |
| C20H26O6     | 1 | 2 | 1 |
| C24H40O3     | 1 | 2 | 1 |
| C24H44O3     | 1 | 2 | 1 |
| C37H71O8P    | 1 | 2 | 1 |
| C22H32O4     | 1 | 2 | 1 |
| C22H36O4     | 1 | 2 | 1 |
| C23H36O4     | 1 | 2 | 1 |
| C25H36O4     | 1 | 2 | 1 |
| C25H50O2     | 1 | 2 | 1 |
| C26H50O2     | 1 | 2 | 1 |
| C24H42O2     | 1 | 2 | 1 |
| C26H38O3     | 1 | 2 | 1 |
| C24H34O4     | 1 | 2 | 1 |
| C25H34O4     | 1 | 2 | 1 |
| C22H30O5     | 1 | 2 | 1 |
| C24H40O2     | 1 | 2 | 1 |
| C25H44O2     | 1 | 2 | 1 |
| C23H36O3     | 1 | 2 | 1 |
| C24H48O3     | 1 | 2 | 1 |
| C26H40O3     | 1 | 2 | 1 |
| C22H36O5     | 1 | 2 | 1 |
| C12H18O3     | 1 | 2 | 1 |
| C15H16O4     | 1 | 2 | 1 |
| C16H24O2     | 1 | 2 | 1 |
| C18H26O2     | 1 | 2 | 1 |
| C20H29FO3    | 1 | 2 | 1 |
| C50H80NO8P   | 1 | 2 | 1 |
| C70H125N3O29 | 1 | 2 | 1 |
| C86H154N2O36 | 1 | 2 | 1 |
| C61H116O6    | 2 | 2 | 1 |
| C24H46O4     | 2 | 2 | 1 |
| C23H44O4     | 2 | 2 | 1 |
| C24H42O4     | 2 | 2 | 1 |
| C28H56O3     | 2 | 2 | 1 |
| C22H34O5     | 2 | 2 | 1 |
| C79H144N2O31 | 2 | 2 | 1 |
| C83H149N3O35 | 2 | 2 | 1 |
| C49H77O13P   | 2 | 2 | 1 |
| C89H166O17P2 | 2 | 2 | 1 |
| C32H56O2     | 2 | 2 | 1 |
| C36H64O4     | 2 | 2 | 1 |
| C28H48O6     | 2 | 2 | 1 |
| C31H50O2     | 2 | 2 | 1 |
| C45H81O12P   | 3 | 2 | 1 |
| C80H142N2O39 | 1 | 3 | 1 |
| C63H114N2O26 | 1 | 3 | 1 |

|              |   |   |   |
|--------------|---|---|---|
| C41H78N07P   | 1 | 3 | 1 |
| C38H74N08P   | 1 | 3 | 1 |
| C43H76N07P   | 1 | 3 | 1 |
| C19H34O5     | 1 | 3 | 1 |
| C23H42O4     | 1 | 3 | 1 |
| C22H38O5     | 2 | 3 | 1 |
| C90H158N4O38 | 1 | 4 | 1 |
| C90H161N3O39 | 1 | 4 | 1 |
| C84H151N3O32 | 2 | 5 | 1 |
| C78H141N033  | 1 | 1 | 2 |
| C84H148N4O39 | 1 | 1 | 2 |
| C26H45N02    | 1 | 1 | 2 |
| C44H86N010P  | 1 | 1 | 2 |
| C16H33ClO    | 1 | 1 | 2 |
| C22H39N04    | 1 | 1 | 2 |
| C20H35NO     | 1 | 1 | 2 |
| C25H43N02    | 1 | 1 | 2 |
| C23H43N03    | 1 | 1 | 2 |
| C22H47N2O5P  | 1 | 1 | 2 |
| C75H136N2O31 | 1 | 1 | 2 |
| C76H139N3O28 | 1 | 1 | 2 |
| C21H44N06P   | 1 | 1 | 2 |
| C85H150N4O40 | 1 | 1 | 2 |
| C45H87O12P   | 1 | 1 | 2 |
| C63H110O6    | 1 | 1 | 2 |
| C85H153N3O36 | 1 | 1 | 2 |
| C46H78N08P   | 1 | 1 | 2 |
| C80H146N2O32 | 1 | 1 | 2 |
| C85H150N4O42 | 1 | 1 | 2 |
| C76H137N3O32 | 1 | 1 | 2 |
| C78H140N2O38 | 1 | 1 | 2 |
| C79H141N3O32 | 1 | 1 | 2 |
| C87H157N3O36 | 1 | 1 | 2 |
| C41H78N09P   | 1 | 1 | 2 |
| C37H72N08P   | 1 | 1 | 2 |
| C18H18O2     | 1 | 1 | 2 |
| C14H24O3     | 1 | 1 | 2 |
| C15H28O4     | 1 | 1 | 2 |
| C17H34O      | 1 | 1 | 2 |
| C15H22O3     | 1 | 1 | 2 |
| C17H30O3     | 1 | 1 | 2 |
| C18H28O2     | 1 | 1 | 2 |
| C25H36O2     | 1 | 1 | 2 |
| C36H72N08P   | 1 | 1 | 2 |
| C20H36O6     | 1 | 1 | 2 |
| C32H54O5     | 1 | 1 | 2 |
| C28H44O2     | 1 | 1 | 2 |

|                |   |   |   |
|----------------|---|---|---|
| C30H44O3       | 1 | 1 | 2 |
| C23H40O5       | 1 | 1 | 2 |
| C27H54O2       | 1 | 1 | 2 |
| C38H74NO9P     | 1 | 1 | 2 |
| C29H42O5       | 1 | 1 | 2 |
| C39H76NO9P     | 1 | 1 | 2 |
| C35H70NO8P     | 1 | 1 | 2 |
| C26H38O5       | 1 | 1 | 2 |
| C16H32O2       | 1 | 1 | 2 |
| C15H20O4       | 1 | 1 | 2 |
| C16H30O3       | 1 | 1 | 2 |
| C15H18O4       | 1 | 1 | 2 |
| C78H142N2O33   | 1 | 1 | 2 |
| C69H134O6      | 1 | 1 | 2 |
| C48H76NO8P     | 1 | 1 | 2 |
| C96H182N2O24P2 | 1 | 1 | 2 |
| C84H150N4O33   | 1 | 1 | 2 |
| C81H145N3O35   | 1 | 1 | 2 |
| C85H153N3O37   | 1 | 1 | 2 |
| C47H70O7       | 1 | 1 | 2 |
| C26H50O3       | 2 | 1 | 2 |
| C26H46O5       | 2 | 1 | 2 |
| C40H76NO9P     | 2 | 1 | 2 |
| C90H160N4O38   | 2 | 1 | 2 |
| C29H46O5       | 2 | 1 | 2 |
| C27H48O5       | 2 | 1 | 2 |
| C28H44O5       | 2 | 1 | 2 |
| C29H44O3       | 2 | 1 | 2 |
| C28H44O4       | 2 | 1 | 2 |
| C29H48O4       | 2 | 1 | 2 |
| C27H44O5       | 2 | 1 | 2 |
| C30H50O3       | 2 | 1 | 2 |
| C29H46O4       | 2 | 1 | 2 |
| C30H50O4       | 2 | 1 | 2 |
| C27H46O5       | 2 | 1 | 2 |
| C29H48O3       | 2 | 1 | 2 |
| C30H52O3       | 2 | 1 | 2 |
| C27H48O4       | 2 | 1 | 2 |
| C28H50O4       | 2 | 1 | 2 |
| C29H42O4       | 2 | 1 | 2 |
| C28H46O5       | 2 | 1 | 2 |
| C29H56O2       | 2 | 1 | 2 |
| C28H48O4       | 2 | 1 | 2 |
| C31H48O4       | 2 | 1 | 2 |
| C32H54O2       | 2 | 1 | 2 |
| C19H40NO5P     | 2 | 1 | 2 |
| C30H46O3       | 2 | 1 | 2 |

|              |   |   |   |
|--------------|---|---|---|
| C88H156N4O39 | 2 | 1 | 2 |
| C86H150N4O40 | 1 | 2 | 2 |
| C18H40NO5P   | 1 | 2 | 2 |
| C78H140N2O37 | 1 | 2 | 2 |
| C78H138N2O39 | 1 | 2 | 2 |
| C18H33NO2    | 1 | 2 | 2 |
| C22H37NO     | 1 | 2 | 2 |
| C27H47NO2    | 1 | 2 | 2 |
| C22H37NO2    | 1 | 2 | 2 |
| C43H82NO9P   | 1 | 2 | 2 |
| C45H82NO10P  | 1 | 2 | 2 |
| C80H144N4O33 | 1 | 2 | 2 |
| C70H128N2O27 | 1 | 2 | 2 |
| C30H52O6     | 1 | 2 | 2 |
| C35H62O5     | 1 | 2 | 2 |
| C32H64O2     | 1 | 2 | 2 |
| C47H73O13P   | 1 | 2 | 2 |
| C87H154N4O40 | 1 | 2 | 2 |
| C40H64O5     | 1 | 2 | 2 |
| C40H66O5     | 1 | 2 | 2 |
| C39H74NO7P   | 1 | 2 | 2 |
| C82H146N2O39 | 1 | 2 | 2 |
| C86H155NO43  | 1 | 2 | 2 |
| C84H152N2O36 | 1 | 2 | 2 |
| C65H110O6    | 1 | 2 | 2 |
| C35H62O4     | 1 | 2 | 2 |
| C39H74NO9P   | 1 | 2 | 2 |
| C17H30O2     | 1 | 2 | 2 |
| C16H22O3     | 1 | 2 | 2 |
| C16H26O3     | 1 | 2 | 2 |
| C18H28O      | 1 | 2 | 2 |
| C16H20O2     | 1 | 2 | 2 |
| C13H20O3     | 1 | 2 | 2 |
| C15H24O3     | 1 | 2 | 2 |
| C11H16O5     | 1 | 2 | 2 |
| C13H22O2     | 1 | 2 | 2 |
| C17H26O2     | 1 | 2 | 2 |
| C14H18O3     | 1 | 2 | 2 |
| C14H22O3     | 1 | 2 | 2 |
| C14H28O      | 1 | 2 | 2 |
| C13H24O2     | 1 | 2 | 2 |
| C18H24O2     | 1 | 2 | 2 |
| C15H18O3     | 1 | 2 | 2 |
| C25H34O3     | 1 | 2 | 2 |
| C16H32O      | 1 | 2 | 2 |
| C34H68O2     | 1 | 2 | 2 |
| C24H32O3     | 1 | 2 | 2 |

|             |   |   |   |
|-------------|---|---|---|
| C21H36O4    | 1 | 2 | 2 |
| C21H36O5    | 1 | 2 | 2 |
| C19H36O2    | 1 | 2 | 2 |
| C29H46O6    | 1 | 2 | 2 |
| C24H32O4    | 1 | 2 | 2 |
| C12H20O3    | 1 | 2 | 2 |
| C13H26O2    | 1 | 2 | 2 |
| C12H22O3    | 1 | 2 | 2 |
| C11H20O4    | 1 | 2 | 2 |
| C12H20O4    | 1 | 2 | 2 |
| C14H26O2    | 1 | 2 | 2 |
| C16H18O2    | 1 | 2 | 2 |
| C12H18O4    | 1 | 2 | 2 |
| C17H24O2    | 1 | 2 | 2 |
| C15H28O2    | 1 | 2 | 2 |
| C13H24O4    | 1 | 2 | 2 |
| C15H30O     | 1 | 2 | 2 |
| C15H30O2    | 1 | 2 | 2 |
| C14H26O3    | 1 | 2 | 2 |
| C14H26O4    | 1 | 2 | 2 |
| C13H18O5    | 1 | 2 | 2 |
| C15H28O3    | 1 | 2 | 2 |
| C18H20O2    | 1 | 2 | 2 |
| C63H114O6   | 1 | 2 | 2 |
| C84H151NO43 | 1 | 2 | 2 |
| C74H135NO28 | 1 | 2 | 2 |
| C24H46O3    | 2 | 2 | 2 |
| C27H43NO2   | 2 | 2 | 2 |
| C21H38O4    | 2 | 2 | 2 |
| C18H33NO    | 2 | 2 | 2 |
| C19H31N     | 2 | 2 | 2 |
| C25H43NO    | 2 | 2 | 2 |
| C26H39NO3   | 2 | 2 | 2 |
| C27H45NO    | 2 | 2 | 2 |
| C19H33NO2   | 2 | 2 | 2 |
| C20H37NO2   | 2 | 2 | 2 |
| C22H29NO2   | 2 | 2 | 2 |
| C23H39NO    | 2 | 2 | 2 |
| C27H43NO    | 2 | 2 | 2 |
| C27H47NO    | 2 | 2 | 2 |
| C26H45NO    | 2 | 2 | 2 |
| C24H37NO2   | 2 | 2 | 2 |
| C27H45NO2   | 2 | 2 | 2 |
| C21H35NO    | 2 | 2 | 2 |
| C22H39NO2   | 2 | 2 | 2 |
| C24H41NO    | 2 | 2 | 2 |
| C22H41NO2   | 2 | 2 | 2 |



|              |   |   |   |
|--------------|---|---|---|
| C30H51NO2    | 2 | 2 | 2 |
| C22H41NO3    | 2 | 2 | 2 |
| C26H43NO     | 2 | 2 | 2 |
| C22H43NO2    | 2 | 2 | 2 |
| C22H44FNO    | 2 | 2 | 2 |
| C87H152N4O37 | 2 | 2 | 2 |
| C86H154N4O38 | 2 | 2 | 2 |
| C86H155N3O36 | 2 | 2 | 2 |
| C31H62O2     | 2 | 2 | 2 |
| C30H58O4     | 2 | 2 | 2 |
| C33H64O2     | 2 | 2 | 2 |
| C27H46O6     | 2 | 2 | 2 |
| C31H52O3     | 2 | 2 | 2 |
| C33H66O2     | 2 | 2 | 2 |
| C30H46O4     | 2 | 2 | 2 |
| C31H50O4     | 2 | 2 | 2 |
| C33H56O4     | 2 | 2 | 2 |
| C28H40O5     | 2 | 2 | 2 |
| C27H44O6     | 2 | 2 | 2 |
| C29H50O4     | 2 | 2 | 2 |
| C30H56O2     | 2 | 2 | 2 |
| C28H48O5     | 2 | 2 | 2 |
| C29H48O5     | 2 | 2 | 2 |
| C31H52O5     | 2 | 2 | 2 |
| C33H58O2     | 2 | 2 | 2 |
| C28H44O6     | 2 | 2 | 2 |
| C31H50O3     | 2 | 2 | 2 |
| C28H50O5     | 2 | 2 | 2 |
| C29H50O5     | 2 | 2 | 2 |
| C31H54O5     | 2 | 2 | 2 |
| C31H60O2     | 2 | 2 | 2 |
| C33H56O3     | 2 | 2 | 2 |
| C34H60O4     | 2 | 2 | 2 |
| C34H66O2     | 2 | 2 | 2 |
| C32H54O4     | 2 | 2 | 2 |
| C32H62O2     | 2 | 2 | 2 |
| C31H54O4     | 2 | 2 | 2 |
| C31H52O4     | 2 | 2 | 2 |
| C30H52O5     | 2 | 2 | 2 |
| C32H54O3     | 2 | 2 | 2 |
| C30H50O5     | 2 | 2 | 2 |
| C30H48O5     | 2 | 2 | 2 |
| C21H29FO5    | 2 | 2 | 2 |
| C25H41FO4    | 2 | 2 | 2 |
| C17H28O2     | 2 | 2 | 2 |
| C24H34O3     | 2 | 2 | 2 |
| C24H36O4     | 2 | 2 | 2 |

|              |   |   |   |
|--------------|---|---|---|
| C22H39N3O3   | 2 | 2 | 2 |
| C24H43N3O3   | 2 | 2 | 2 |
| C88H157N3O36 | 2 | 2 | 2 |
| C28H47NO     | 2 | 2 | 2 |
| C86H154N2O38 | 1 | 3 | 2 |
| C19H32O      | 1 | 3 | 2 |
| C43H84NO10P  | 1 | 3 | 2 |
| C46H80NO9P   | 1 | 3 | 2 |
| C23H40O4     | 1 | 3 | 2 |
| C12H22O4     | 1 | 3 | 2 |
| C14H28O2     | 1 | 3 | 2 |
| C41H72NO7P   | 1 | 3 | 2 |
| C79H141N3O36 | 1 | 3 | 2 |
| C77H146O17P2 | 2 | 3 | 2 |
| C82H148N2O36 | 2 | 3 | 2 |
| C78H141N3O33 | 2 | 3 | 2 |
| C44H85O12P   | 2 | 3 | 2 |
| C87H157N3O37 | 2 | 3 | 2 |
| C16H28O2     | 2 | 3 | 2 |
| C15H20O3     | 2 | 3 | 2 |
| C89H156N4O38 | 2 | 3 | 2 |
| C82H147N3O33 | 1 | 4 | 2 |
| C37H74NO8P   | 3 | 4 | 2 |
| C84H152N2O38 | 1 | 5 | 2 |
| C90H163N3O38 | 1 | 1 | 3 |
| C88H158N2O36 | 1 | 1 | 3 |
| C74H134N2O27 | 1 | 1 | 3 |
| C79H138N4O37 | 1 | 1 | 3 |
| C86H155N3O38 | 1 | 1 | 3 |
| C77H138N2O31 | 1 | 1 | 3 |
| C91H158N4O38 | 1 | 1 | 3 |
| C62H116N2O18 | 1 | 1 | 3 |
| C65H108O6    | 1 | 1 | 3 |
| C87H154N4O37 | 1 | 1 | 3 |
| C86H153N3O39 | 2 | 1 | 3 |
| C80H143N3O38 | 2 | 1 | 3 |
| C80H145NO38  | 2 | 1 | 3 |
| C75H135N3O31 | 2 | 1 | 3 |
| C82H150N2O32 | 2 | 1 | 3 |
| C87H154N4O36 | 2 | 1 | 3 |
| C87H156N4O36 | 2 | 1 | 3 |
| C26H46O6     | 2 | 1 | 3 |
| C82H148N2O32 | 2 | 1 | 3 |
| C80H143N3O37 | 2 | 1 | 3 |
| C82H134O14   | 2 | 1 | 3 |
| C79H140N4O37 | 3 | 1 | 3 |
| C81H145N3O36 | 3 | 1 | 3 |

|                |   |   |   |
|----------------|---|---|---|
| C82H147N3O37   | 1 | 2 | 3 |
| C86H154N2O43   | 1 | 2 | 3 |
| C87H156N4O37   | 1 | 2 | 3 |
| C13H24O3       | 1 | 2 | 3 |
| C16H30O2       | 1 | 2 | 3 |
| C88H157N3O39   | 1 | 2 | 3 |
| C87H152N4O38   | 1 | 2 | 3 |
| C83H150N2O35   | 2 | 2 | 3 |
| C86H153N3O41   | 2 | 2 | 3 |
| C86H156N2O36   | 2 | 2 | 3 |
| C90H163N3O37   | 2 | 2 | 3 |
| C89H160N4O36   | 2 | 2 | 3 |
| C63H112O6      | 2 | 2 | 3 |
| C84H153N3O33   | 2 | 2 | 3 |
| C78H141N3O28   | 2 | 2 | 3 |
| C78H141NO38    | 3 | 2 | 3 |
| C16H30F2O2     | 1 | 3 | 3 |
| C66H125NO5     | 1 | 3 | 3 |
| C98H195O21PS   | 1 | 3 | 3 |
| C20H23O9S      | 1 | 3 | 3 |
| C22H43NO3      | 2 | 3 | 3 |
| C23H41NO3      | 2 | 3 | 3 |
| C17H27N3O17P2  | 2 | 3 | 3 |
| C82H149N3O33   | 2 | 3 | 3 |
| C88H159N3O37   | 2 | 3 | 3 |
| C68H132O6      | 3 | 3 | 3 |
| C82H150N2O33   | 1 | 4 | 3 |
| C74H135NO27    | 1 | 4 | 3 |
| C84H150N2O39   | 1 | 4 | 3 |
| C20H23O10S     | 1 | 4 | 3 |
| C78H141N3O29   | 2 | 4 | 3 |
| C80H144N2O38   | 2 | 5 | 3 |
| C84H151N3O38   | 1 | 1 | 4 |
| C46H78O5       | 1 | 1 | 4 |
| C72H133N3O23   | 1 | 1 | 4 |
| C49H74O4       | 1 | 1 | 4 |
| C58H116NO8P    | 1 | 1 | 4 |
| C88H157N3O38   | 2 | 1 | 4 |
| C81H144N4O36   | 2 | 1 | 4 |
| C44H74O5       | 2 | 1 | 4 |
| C78H148N2O24P2 | 2 | 1 | 4 |
| C85H151N3O35   | 2 | 1 | 4 |
| C75H135N3O32   | 2 | 1 | 4 |
| C61H118O6      | 1 | 2 | 4 |
| C87H155N3O35   | 1 | 2 | 4 |
| C86H152N4O38   | 1 | 2 | 4 |
| C76H136N4O33   | 2 | 2 | 4 |

|              |   |   |   |
|--------------|---|---|---|
| C87H154N4O41 | 3 | 2 | 4 |
| C27H42F2O3   | 1 | 3 | 4 |
| C82H148N2O38 | 1 | 3 | 4 |
| C83H149N3O36 | 1 | 3 | 4 |
| C85H150N4O37 | 1 | 4 | 4 |
| C86H154N4O33 | 2 | 4 | 4 |
| C80H143N3O36 | 1 | 1 | 5 |
| C90H161N3O36 | 2 | 1 | 5 |
| C76H138N2O33 | 1 | 2 | 5 |
| C40H75O7P    | 1 | 2 | 5 |
| C76H137N3O33 | 1 | 2 | 5 |
| C82H149NO38  | 1 | 2 | 5 |
| C79H143N3O31 | 1 | 2 | 5 |
| C80H144N2O37 | 2 | 2 | 5 |
| C82H146N4O34 | 2 | 2 | 5 |
| C84H150N4O34 | 2 | 2 | 5 |
| C81H142N4O37 | 2 | 2 | 5 |
| C83H148N2O35 | 2 | 2 | 5 |
| C76H138N2O32 | 2 | 2 | 5 |
| C84H153N3O32 | 1 | 3 | 5 |
| C85H154N2O35 | 2 | 3 | 5 |
| C85H153N3O35 | 2 | 3 | 5 |
| C84H152N4O33 | 2 | 3 | 5 |
| C78H139N3O29 | 2 | 3 | 5 |
| C88H160N2O37 | 2 | 3 | 5 |
| C69H126O6    | 3 | 3 | 5 |
| C69H128O6    | 3 | 3 | 5 |
| C89H156N4O37 | 1 | 4 | 5 |
| C20H32Br2O2  | 1 | 4 | 5 |
| C20H21O10S   | 1 | 6 | 5 |
| C86H154N2O39 | 2 | 1 | 6 |
| C67H130O6    | 2 | 3 | 6 |
| C85H140O     | 2 | 3 | 6 |
| C18H31NO     | 2 | 5 | 6 |

Supplemental Table 5:

MG1655 25 ng/mL, 30 min. exposure up/downregulated lipids

| Measured m/z | Chemical Formula | Adduct     | Error (ppm) | Up/downreg | Lipid Category            | Absolute(Fold Change) | IS Confirmation | No. of Batches (of 3) |
|--------------|------------------|------------|-------------|------------|---------------------------|-----------------------|-----------------|-----------------------|
| 586.07085    | C25H25O14        | [M-2H+K]-  | 2.809       | ↑          | Fatty Acyls [FA]          | 3.6                   | No              | 2                     |
| 631.59850    | C40H80O3         | [M+Na]+    | 3.190       | ↓*         | Fatty Acyls [FA]          | 4.6                   | No              | 3                     |
| 579.49920    | C36H66O5         | [M+H]+     | 0.602       | ↑          | Glycerolipids [GL]        | 3.8                   | No              | 3                     |
| 985.81860    | C65H108O6        | [M+H]+     | 3.872       | ↓*         | Glycerolipids [GL]        | 3.4                   | No              | 1                     |
| 607.47230    | C33H67O7P        | [M+H]+     | 3.343       | ↑          | Glycerophospholipids [GP] | 3.0                   | Yes             | 1                     |
| 714.54060    | C40H76NO7P       | [M+H]+     | 4.434       | ↑          | Glycerophospholipids [GP] | 3.0                   | Yes             | 2                     |
| 727.45780    | C39H67O10P       | [M+H]+     | 3.830       | ↑          | Glycerophospholipids [GP] | 3.2                   | Yes             | 3                     |
| 814.62970    | C46H88NO8P       | [M+H]+     | 3.539       | ↑          | Glycerophospholipids [GP] | 3.2                   | Yes             | 2                     |
| 744.45950    | C40H68NO8P       | [M+Na]+    | 1.980       | ↑          | Glycerophospholipids [GP] | 3.3                   | Yes             | 2                     |
| 431.21992    | C21H35O7P        | [M+H]+     | 0.122       | ↑          | Glycerophospholipids [GP] | 3.7                   | Yes             | 2                     |
| 874.50220    | C46H78NO10P      | [M+K]+     | 2.464       | ↑          | Glycerophospholipids [GP] | 3.9                   | Yes             | 3                     |
| 748.43219    | C39H68NO8P       | [M+K]+     | 0.302       | ↑          | Glycerophospholipids [GP] | 4.0                   | Yes             | 1                     |
| 934.66960    | C52H98NO8P       | [M+K]+     | 3.087       | ↑          | Glycerophospholipids [GP] | 4.2                   | Yes             | 3                     |
| 933.52140    | C49H83O12P       | [M+K]+     | 4.848       | ↑          | Glycerophospholipids [GP] | 4.3                   | Yes             | 1                     |
| 685.40820    | C34H63O10P       | [M+Na]+    | 3.708       | ↑          | Glycerophospholipids [GP] | 5.3                   | Yes             | 1                     |
| 881.47140    | C48H75O10P       | [M+K]+     | 2.378       | ↑          | Glycerophospholipids [GP] | 6.1                   | Yes             | 1                     |
| 686.45180    | C35H70NO7P       | [M+K]+     | 1.310       | ↓*         | Glycerophospholipids [GP] | 3.4                   | Yes             | 1                     |
| 833.49820    | C41H79O12P       | [M+K]+     | 4.288       | ↓*         | Glycerophospholipids [GP] | 4.0                   | Yes             | 2                     |
| 929.65990    | C50H99O10P       | [M+K]+     | 1.502       | ↓*         | Glycerophospholipids [GP] | 4.0                   | Yes             | 3                     |
| 969.66850    | C52H98O13        | [M+K]+     | 4.173       | ↓*         | Saccharolipids [SL]       | 3.6                   | No              | 2                     |
| 862.51010    | C42H81NO12S      | [M+K]+     | 1.809       | ↑          | Sphingolipids [SP]        | 3.9                   | No              | 1                     |
| 890.64210    | C48H91NO11S      | [M+H]+     | 3.354       | ↑          | Sphingolipids [SP]        | 4.4                   | No              | 2                     |
| 965.85120    | C63H114O6        | [M-H]-     | 2.606       | ↑*         | Sphingolipids [SP]        | 3.0                   | No              | 2                     |
| 983.84130    | C61H118O6        | [M-2H+K]-  | 0.408       | ↑*         | Sphingolipids [SP]        | 3.2                   | No              | 1                     |
| 984.83180    | C58H116NO8P      | [M-H]-     | 4.298       | ↑*         | Sphingolipids [SP]        | 3.3                   | No              | 2                     |
| 983.80076    | C63H110O6        | [M-2H+Na]- | 3.657       | ↑*         | Sphingolipids [SP]        | 7.5                   | No              | 1                     |
| 302.15210    | C16H27NO2        | [M-2H+Na]- | 0.450       | ↓*         | Sphingolipids [SP]        | 3.4                   | No              | 1                     |
| 781.44000    | C41H64O14        | [M+H]+     | 3.281       | ↑          | Sterol Lipids [ST]        | 3.0                   | Yes             | 3                     |
| 441.29791    | C26H39F3O2       | [M+H]+     | 0.293       | ↓*         | Sterol Lipids [ST]        | 20.5                  | Yes             | 2                     |

Supplemental Table 6:

MG1655 50 ng/mL, 30 min. exposure up/downregulated lipids

| Measured m/z | Chemical Formula | Adduct    | Error (ppm) | up/downregulated | Lipid Category            | Absolute(fold change) | IS Confirmation | No. of Batches (of 3) |
|--------------|------------------|-----------|-------------|------------------|---------------------------|-----------------------|-----------------|-----------------------|
| 329.02057    | C18H12O4         | [M-2H+K]- | 3.197       | ↑                | Fatty Acyls [FA]          | 3.3                   | No              | 3                     |
| 353.21220    | C23H30O3         | [M-H]-    | 1.498       | ↓*               | Prenol Lipids [PR]        | 3.1                   | No              | 1                     |
| 363.29040    | C23H40O3         | [M-H]-    | 1.319       | ↓*               | Glycerolipids [GL]        | 3.3                   | No              | 3                     |
| 377.16040    | C20H26O7         | [M-H]-    | 0.978       | ↓*               | Prenol Lipids [PR]        | 3.0                   | No              | 2                     |
| 394.30830    | C25H43NO         | [M-2H+Na] | 0.718       | ↓*               | Fatty Acyls [FA]          | 3.0                   | No              | 3                     |
| 453.30110    | C29H42O4         | [M-H]-    | 1.355       | ↓*               | Prenol Lipids [PR]        | 4.4                   | No              | 3                     |
| 481.36850    | C32H50O3         | [M-H]-    | 0.683       | ↓*               | Sterol Lipids [ST]        | 3.8                   | Yes             | 3                     |
| 485.29060    | C29H42O6         | [M-H]-    | 0.585       | ↓*               | Sterol Lipids [ST]        | 3.7                   | Yes             | 3                     |
| 485.39980    | C32H54O3         | [M-H]-    | 0.678       | ↓*               | Prenol Lipids [PR]        | 3.3                   | No              | 1                     |
| 487.37940    | C31H52O4         | [M-H]-    | 1.362       | ↓*               | Sterol Lipids [ST]        | 3.3                   | Yes             | 3                     |
| 551.23788    | C26H43O9P        | [M-2H+Na] | 1.288       | ↑                | Fatty Acyls [FA]          | 3.1                   | No              | 2                     |
| 551.48190    | C38H62O2         | [M+H]+    | 1.643       | ↑                | Prenol Lipids [PR]        | 3.0                   | No              | 3                     |
| 561.48832    | C36H64O4         | [M+H]+    | 0.054       | ↓*               | Fatty Acyls [FA]          | 9.1                   | No              | 1                     |
| 564.27060    | C24H48NO9P       | [M+K]+    | 0.392       | ↑                | Glycerophospholipids [GP] | 4.5                   | Yes             | 2                     |
| 590.30880    | C26H50NO10P      | [M+Na]+   | 3.039       | ↑                | Glycerophospholipids [GP] | 3.1                   | Yes             | 1                     |
| 613.06110    | C26H24O15        | [M-2H+K]- | 2.470       | ↑                | Fatty Acyls [FA]          | 6.4                   | No              | 2                     |
| 621.42028    | C32H60O11        | [M+H]+    | 1.792       | ↑*               | Saccharolipids [SL]       | 3.3                   | No              | 3                     |
| 667.43248    | C37H63O8P        | [M+H]+    | 2.107       | ↑                | Glycerophospholipids [GP] | 4.3                   | Yes             | 2                     |
| 672.45798    | C36H66NO8P       | [M+H]+    | 3.644       | ↓*               | Glycerophospholipids [GP] | 3.0                   | Yes             | 1                     |
| 691.52935    | C45H70O5         | [M+H]+    | 1.155       | ↑                | Glycerolipids [GL]        | 3.2                   | No              | 3                     |
| 714.54060    | C40H76NO7P       | [M+H]+    | 4.434       | ↑                | Glycerophospholipids [GP] | 3.3                   | Yes             | 2                     |
| 715.52904    | C47H70O5         | [M+H]+    | 1.553       | ↑                | Glycerolipids [GL]        | 3.0                   | No              | 2                     |
| 720.45765    | C38H68NO8P       | [M+Na]+   | 0.528       | ↓*               | Glycerophospholipids [GP] | 3.0                   | Yes             | 3                     |
| 742.50210    | C40H74NO9P       | [M-H]-    | 0.267       | ↓*               | Glycerophospholipids [GP] | 3.0                   | Yes             | 3                     |
| 773.51030    | C45H73O8P        | [M+H]+    | 2.371       | ↑                | Glycerophospholipids [GP] | 3.2                   | Yes             | 2                     |
| 781.44000    | C41H64O14        | [M+H]+    | 3.281       | ↑                | Sterol Lipids [ST]        | 3.0                   | Yes             | 3                     |
| 802.59221    | C44H84NO9P       | [M+H]+    | 4.965       | ↑                | Glycerophospholipids [GP] | 6.3                   | Yes             | 3                     |
| 859.53210    | C45H79O13P       | [M+H]+    | 1.814       | ↑                | Glycerophospholipids [GP] | 3.1                   | Yes             | 1                     |
| 871.56760    | C47H85O12P       | [M-H]-    | 2.804       | ↓*               | Glycerophospholipids [GP] | 4.7                   | Yes             | 1                     |
| 874.50220    | C46H78NO10P      | [M+K]+    | 2.464       | ↑                | Glycerophospholipids [GP] | 6.7                   | Yes             | 1                     |
| 879.49976    | C47H75O13P       | [M+H]+    | 2.949       | ↑                | Glycerophospholipids [GP] | 4.1                   | Yes             | 3                     |
| 881.47140    | C48H75O10P       | [M+K]+    | 2.378       | ↑                | Glycerophospholipids [GP] | 3.3                   | Yes             | 2                     |
| 889.48100    | C46H75O13P       | [M+Na]+   | 3.713       | ↑                | Glycerophospholipids [GP] | 4.0                   | Yes             | 3                     |
| 890.64210    | C48H91NO11S      | [M+H]+    | 3.354       | ↑                | Sphingolipids [SP]        | 6.1                   | No              | 1                     |
| 892.54870    | C47H84NO10P      | [M+K]+    | 1.910       | ↑                | Glycerophospholipids [GP] | 4.5                   | Yes             | 3                     |
| 905.46960    | C50H75O10P       | [M+K]+    | 4.303       | ↓*               | Glycerophospholipids [GP] | 3.2                   | Yes             | 3                     |
| 933.52140    | C49H83O12P       | [M+K]+    | 4.848       | ↑                | Glycerophospholipids [GP] | 4.6                   | Yes             | 2                     |

Supplemental Table 7:

MG1655 25 ng/mL, 60 min. exposure, up/downregulated lipids

| Measured m/z | Chemical Formula | Adduct    | Error (ppm) | up/downregulated | Lipid Category   | Absolute(Fold Change) | IS Confirmation | No. of Batches (of 3) |
|--------------|------------------|-----------|-------------|------------------|------------------|-----------------------|-----------------|-----------------------|
| 453.05919    | C21H20O9         | [M-2H+K]- | 0.889       | ↑                | Fatty Acyls [FA] | 3.1                   | No              | 3                     |
| 539.48140    | C37H62O2         | [M+H]+    | 2.606       | ↓*               | Fatty Acyls [FA] | 3.1                   | No              | 2                     |
| 699.53820    | C38H76O9         | [M+Na]+   | 0.722       | ↓*               | Fatty Acyls [FA] | 3.1                   | No              | 2                     |
| 640.04778    | C27H23O16        | [M-2H+K]- | 1.735       | ↑                | Fatty Acyls [FA] | 3.2                   | No              | 2                     |
| 591.52860    | C40H72           | [M+K]+    | 2.522       | ↑                | Fatty Acyls [FA] | 3.3                   | No              | 1                     |
| 589.53060    | C37H74O2         | [M+K]+    | 3.372       | ↓*               | Fatty Acyls [FA] | 3.3                   | No              | 1                     |
| 687.47830    | C36H72O9         | [M+K]+    | 4.426       | ↓*               | Fatty Acyls [FA] | 3.3                   | No              | 2                     |
| 521.19010    | C25H35ClO8       | [M+Na]+   | 3.296       | ↓*               | Fatty Acyls [FA] | 3.5                   | No              | 1                     |
| 300.29020    | C18H37NO2        | [M+H]+    | 0.180       | ↓*               | Fatty Acyls [FA] | 3.5                   | No              | 3                     |
| 617.61990    | C40H82O2         | [M+Na]+   | 2.186       | ↓*               | Fatty Acyls [FA] | 3.5                   | No              | 1                     |
| 579.06919    | C30H22O10        | [M-2H+K]- | 0.288       | ↑                | Fatty Acyls [FA] | 3.6                   | No              | 3                     |
| 331.24810    | C18H34O5         | [M+H]+    | 1.060       | ↓*               | Fatty Acyls [FA] | 3.6                   | No              | 1                     |
| 541.22090    | C27H37ClO9       | [M+H]+    | 0.852       | ↓*               | Fatty Acyls [FA] | 3.7                   | No              | 2                     |
| 318.27910    | C21H35NO         | [M+H]+    | 1.851       | ↓*               | Fatty Acyls [FA] | 3.7                   | No              | 2                     |
| 587.07984    | C25H26O14        | [M-2H+K]- | 0.809       | ↑                | Fatty Acyls [FA] | 3.8                   | No              | 3                     |
| 370.27110    | C22H37NO2        | [M+Na]+   | 2.965       | ↓*               | Fatty Acyls [FA] | 3.8                   | No              | 3                     |
| 346.31030    | C23H39NO         | [M+H]+    | 1.990       | ↓*               | Fatty Acyls [FA] | 3.8                   | No              | 2                     |
| 391.37080    | C25H52           | [M+K]+    | 0.491       | ↓*               | Fatty Acyls [FA] | 3.9                   | No              | 3                     |
| 591.60860    | C40H78O2         | [M+H]+    | 1.004       | ↓*               | Fatty Acyls [FA] | 3.9                   | No              | 2                     |
| 675.54040    | C38H74O9         | [M+H]+    | 1.052       | ↓*               | Fatty Acyls [FA] | 3.9                   | No              | 1                     |
| 571.04174    | C22H20O16S       | [M-H]-    | 4.120       | ↑                | Fatty Acyls [FA] | 4.0                   | No              | 2                     |
| 491.45980    | C31H64O          | [M+K]+    | 0.767       | ↓*               | Fatty Acyls [FA] | 4.1                   | No              | 3                     |
| 509.52950    | C34H68O2         | [M+H]+    | 0.502       | ↓*               | Fatty Acyls [FA] | 4.2                   | No              | 2                     |
| 431.17215    | C23H26O8         | [M+H]+    | 3.597       | ↑*               | Fatty Acyls [FA] | 4.2                   | No              | 1                     |
| 353.05070    | C15H23BrO2       | [M+K]+    | 3.249       | ↓*               | Fatty Acyls [FA] | 4.2                   | No              | 1                     |
| 561.48860    | C36H64O4         | [M+H]+    | 0.559       | ↓*               | Fatty Acyls [FA] | 4.2                   | No              | 3                     |
| 341.26810    | C20H36O4         | [M+H]+    | 3.182       | ↓*               | Fatty Acyls [FA] | 4.4                   | No              | 2                     |
| 639.19860    | C29H41ClO11      | [M+K]+    | 1.798       | ↓*               | Fatty Acyls [FA] | 4.5                   | No              | 3                     |
| 577.46790    | C32H64O8         | [M+H]+    | 0.080       | ↓*               | Fatty Acyls [FA] | 4.5                   | No              | 2                     |
| 299.25790    | C18H34O3         | [M+H]+    | 2.423       | ↓*               | Fatty Acyls [FA] | 4.5                   | No              | 2                     |
| 613.40980    | C32H62O8         | [M+K]+    | 2.644       | ↓*               | Fatty Acyls [FA] | 4.5                   | No              | 1                     |
| 713.49982    | C38H74O9         | [M+K]+    | 3.967       | ↓*               | Fatty Acyls [FA] | 4.5                   | No              | 3                     |
| 424.32190    | C28H41NO2        | [M+H]+    | 0.815       | ↓*               | Fatty Acyls [FA] | 4.5                   | No              | 1                     |
| 673.61240    | C42H82O4         | [M+Na]+   | 1.960       | ↓*               | Fatty Acyls [FA] | 4.6                   | No              | 3                     |
| 595.17000    | C27H37ClO10      | [M+K]+    | 2.077       | ↓*               | Fatty Acyls [FA] | 4.6                   | No              | 1                     |
| 381.18220    | C21H29ClO4       | [M+H]+    | 2.791       | ↓*               | Fatty Acyls [FA] | 4.6                   | No              | 1                     |
| 420.38240    | C25H51NO2        | [M+Na]+   | 1.549       | ↓*               | Fatty Acyls [FA] | 4.7                   | No              | 3                     |
| 431.27900    | C26H38O5         | [M+H]+    | 1.741       | ↓*               | Fatty Acyls [FA] | 4.8                   | No              | 3                     |
| 467.26130    | C23H40O8         | [M+Na]+   | 1.691       | ↓*               | Fatty Acyls [FA] | 4.8                   | No              | 3                     |
| 418.27210    | C23H41NO3        | [M+K]+    | 0.600       | ↓*               | Fatty Acyls [FA] | 4.9                   | No              | 3                     |
| 697.52030    | C38H74O9         | [M+Na]+   | 3.950       | ↓*               | Fatty Acyls [FA] | 5.0                   | No              | 1                     |
| 495.51190    | C33H66O2         | [M+H]+    | 4.452       | ↓*               | Fatty Acyls [FA] | 5.0                   | No              | 2                     |
| 379.24830    | C22H34O5         | [M+H]+    | 0.398       | ↓*               | Fatty Acyls [FA] | 5.0                   | No              | 1                     |
| 509.28120    | C28H42N2O3S      | [M+Na]+   | 0.363       | ↓*               | Fatty Acyls [FA] | 5.0                   | No              | 1                     |
| 485.31220    | C30H42N2O2       | [M+Na]+   | 4.527       | ↓*               | Fatty Acyls [FA] | 5.0                   | No              | 1                     |
| 479.15950    | C23H33ClO6       | [M+K]+    | 1.619       | ↓*               | Fatty Acyls [FA] | 5.1                   | No              | 1                     |
| 226.96810    | C7H9BrO2         | [M+Na]+   | 1.185       | ↓*               | Fatty Acyls [FA] | 5.1                   | No              | 2                     |
| 405.34950    | C25H50O          | [M+K]+    | 0.920       | ↓*               | Fatty Acyls [FA] | 5.1                   | No              | 2                     |
| 627.49800    | C40H66O5         | [M+H]+    | 1.356       | ↓*               | Fatty Acyls [FA] | 5.1                   | No              | 1                     |
| 539.42210    | C34H60O2         | [M+K]+    | 1.739       | ↓*               | Fatty Acyls [FA] | 5.2                   | No              | 1                     |
| 487.30030    | C28H42N2O3S      | [M+H]+    | 1.763       | ↓*               | Fatty Acyls [FA] | 5.2                   | No              | 1                     |
| 445.24830    | C23H38N2O4       | [M+K]+    | 3.223       | ↓*               | Fatty Acyls [FA] | 5.2                   | No              | 3                     |
| 343.26020    | C21H36O2         | [M+Na]+   | 3.205       | ↓*               | Fatty Acyls [FA] | 5.2                   | No              | 2                     |
| 461.41040    | C29H58O          | [M+K]+    | 4.493       | ↓*               | Fatty Acyls [FA] | 5.2                   | No              | 1                     |
| 323.25810    | C20H34O3         | [M+H]+    | 1.612       | ↓*               | Fatty Acyls [FA] | 5.2                   | No              | 1                     |
| 419.42150    | C27H56O          | [M+Na]+   | 3.302       | ↓*               | Fatty Acyls [FA] | 5.3                   | No              | 1                     |
| 360.22970    | C20H35NO2        | [M+K]+    | 2.182       | ↓*               | Fatty Acyls [FA] | 5.4                   | No              | 3                     |
| 230.21170    | C13H27NO2        | [M+H]+    | 1.412       | ↓*               | Fatty Acyls [FA] | 5.4                   | No              | 3                     |
| 434.23090    | C22H37NO5        | [M+K]+    | 0.044       | ↓*               | Fatty Acyls [FA] | 5.4                   | No              | 2                     |
| 249.00060    | C6H10O8          | [M+K]+    | 2.839       | ↓*               | Fatty Acyls [FA] | 5.4                   | No              | 3                     |
| 337.27070    | C19H38O3         | [M+Na]+   | 3.454       | ↓*               | Fatty Acyls [FA] | 5.5                   | No              | 3                     |
| 205.06240    | C10H14O2         | [M+K]+    | 3.350       | ↓*               | Fatty Acyls [FA] | 5.6                   | No              | 3                     |
| 450.36950    | C26H53NO2        | [M+K]+    | 4.079       | ↓*               | Fatty Acyls [FA] | 5.8                   | No              | 1                     |
| 501.28880    | C30H42N2O2       | [M+K]+    | 0.928       | ↓*               | Fatty Acyls [FA] | 5.8                   | No              | 2                     |
| 627.48060    | C34H68O8         | [M+Na]+   | 0.940       | ↓*               | Fatty Acyls [FA] | 5.8                   | No              | 3                     |
| 635.00136    | C22H20O18S2      | [M-H]-    | 0.116       | ↑                | Fatty Acyls [FA] | 5.9                   | No              | 2                     |
| 221.18860    | C13H26O          | [M+Na]+   | 0.592       | ↓*               | Fatty Acyls [FA] | 5.9                   | No              | 2                     |
| 215.23770    | C14H30O          | [M+H]+    | 0.813       | ↓*               | Fatty Acyls [FA] | 5.9                   | No              | 2                     |
| 443.45770    | C30H60           | [M+Na]+   | 3.540       | ↓*               | Fatty Acyls [FA] | 5.9                   | No              | 3                     |
| 267.26760    | C18H34O          | [M+H]+    | 4.456       | ↓*               | Fatty Acyls [FA] | 6.0                   | No              | 1                     |
| 385.33190    | C23H44O4         | [M+H]+    | 0.296       | ↓*               | Fatty Acyls [FA] | 6.0                   | No              | 1                     |
| 557.53080    | C38H68O2         | [M+H]+    | 1.873       | ↓*               | Fatty Acyls [FA] | 6.0                   | No              | 2                     |
| 247.13030    | C13H20O3         | [M+Na]+   | 2.707       | ↓*               | Fatty Acyls [FA] | 6.0                   | No              | 1                     |
| 203.12830    | C10H18O4         | [M+H]+    | 0.172       | ↓*               | Fatty Acyls [FA] | 6.1                   | No              | 3                     |
| 282.21930    | C18H29N          | [M+Na]+   | 1.658       | ↓*               | Fatty Acyls [FA] | 6.1                   | No              | 1                     |
| 317.18770    | C18H30O2         | [M+K]+    | 1.854       | ↓*               | Fatty Acyls [FA] | 6.2                   | No              | 2                     |
| 376.31860    | C22H43NO2        | [M+Na]+   | 1.456       | ↓*               | Fatty Acyls [FA] | 6.2                   | No              | 1                     |

|           |              |           |       |    |                           |      |     |   |
|-----------|--------------|-----------|-------|----|---------------------------|------|-----|---|
| 507.36020 | C32H52O2     | [M+K]+    | 0.469 | ↓* | Fatty Acyls [FA]          | 6.3  | No  | 2 |
| 304.26120 | C18H35NO     | [M+Na]+   | 1.423 | ↓* | Fatty Acyls [FA]          | 6.3  | No  | 3 |
| 575.44990 | C32H62O8     | [M+H]+    | 4.164 | ↓* | Fatty Acyls [FA]          | 6.3  | No  | 2 |
| 591.27120 | C28H44N2O8S  | [M+Na]+   | 0.693 | ↓* | Fatty Acyls [FA]          | 6.3  | No  | 2 |
| 231.09970 | C12H16O3     | [M+Na]+   | 0.134 | ↓* | Fatty Acyls [FA]          | 6.4  | No  | 3 |
| 418.32820 | C24H45NO3    | [M+Na]+   | 3.617 | ↓* | Fatty Acyls [FA]          | 6.4  | No  | 1 |
| 377.22860 | C20H34O5     | [M+Na]+   | 4.758 | ↓* | Fatty Acyls [FA]          | 6.5  | No  | 1 |
| 404.35210 | C26H45NO2    | [M+H]+    | 1.865 | ↓* | Fatty Acyls [FA]          | 6.5  | No  | 1 |
| 390.29790 | C22H41NO3    | [M+Na]+   | 1.314 | ↓* | Fatty Acyls [FA]          | 6.6  | No  | 1 |
| 238.17866 | C12H25NO2    | [M+Na]+   | 1.530 | ↓* | Fatty Acyls [FA]          | 6.6  | No  | 2 |
| 455.32920 | C28H48O2     | [M+K]+    | 0.136 | ↓* | Fatty Acyls [FA]          | 6.6  | No  | 2 |
| 389.34050 | C26H44O2     | [M+H]+    | 3.740 | ↓* | Fatty Acyls [FA]          | 6.7  | No  | 1 |
| 560.12100 | C26H36BrNO3S | [M+K]+    | 4.703 | ↓* | Fatty Acyls [FA]          | 6.8  | No  | 3 |
| 463.41060 | C28H56O3     | [M+Na]+   | 4.564 | ↓* | Fatty Acyls [FA]          | 6.9  | No  | 1 |
| 481.49940 | C32H64O2     | [M+H]+    | 1.961 | ↓* | Fatty Acyls [FA]          | 6.9  | No  | 2 |
| 255.07800 | C14H16O2     | [M+K]+    | 2.889 | ↓* | Fatty Acyls [FA]          | 6.9  | No  | 3 |
| 567.57120 | C37H74O3     | [M+H]+    | 0.742 | ↓* | Fatty Acyls [FA]          | 6.9  | No  | 3 |
| 281.11800 | C18H16O3     | [M+H]+    | 0.978 | ↓* | Fatty Acyls [FA]          | 7.0  | No  | 1 |
| 666.30100 | C30H49N3O10S | [M+Na]+   | 3.961 | ↓* | Fatty Acyls [FA]          | 7.0  | No  | 3 |
| 353.34130 | C23H44O2     | [M+H]+    | 1.857 | ↓* | Fatty Acyls [FA]          | 7.1  | No  | 3 |
| 249.21860 | C15H30O      | [M+Na]+   | 3.350 | ↓* | Fatty Acyls [FA]          | 7.2  | No  | 3 |
| 380.31770 | C23H41NO3    | [M+H]+    | 3.237 | ↓* | Fatty Acyls [FA]          | 7.2  | No  | 3 |
| 414.30210 | C26H39NO3    | [M+H]+    | 3.092 | ↓* | Fatty Acyls [FA]          | 7.3  | No  | 3 |
| 329.16020 | C16H24O7     | [M+H]+    | 0.516 | ↓* | Fatty Acyls [FA]          | 7.3  | No  | 1 |
| 435.31870 | C23H44N2O4   | [M+Na]+   | 2.704 | ↓* | Fatty Acyls [FA]          | 7.3  | No  | 3 |
| 437.33880 | C28H46O2     | [M+Na]+   | 1.715 | ↓* | Fatty Acyls [FA]          | 7.3  | No  | 1 |
| 317.28050 | C20H38O      | [M+Na]+   | 4.838 | ↓* | Fatty Acyls [FA]          | 7.4  | No  | 3 |
| 239.20040 | C15H26O2     | [M+H]+    | 2.947 | ↓* | Fatty Acyls [FA]          | 7.4  | No  | 2 |
| 433.43920 | C28H58O      | [M+Na]+   | 1.534 | ↓* | Fatty Acyls [FA]          | 7.5  | No  | 1 |
| 402.29830 | C23H41NO3    | [M+Na]+   | 0.281 | ↓* | Fatty Acyls [FA]          | 7.5  | No  | 2 |
| 477.03918 | C18H34Br2O2  | [M-2H+K]- | 2.985 | ↑  | Fatty Acyls [FA]          | 7.7  | No  | 2 |
| 521.39790 | C30H58O4     | [M+K]+    | 1.308 | ↓* | Fatty Acyls [FA]          | 7.8  | No  | 2 |
| 494.26900 | C28H41NO4    | [M+K]+    | 3.508 | ↓* | Fatty Acyls [FA]          | 7.9  | No  | 2 |
| 317.24760 | C21H32O2     | [M+H]+    | 1.437 | ↓* | Fatty Acyls [FA]          | 7.9  | No  | 3 |
| 559.23240 | C27H39ClO10  | [M+H]+    | 2.496 | ↓* | Fatty Acyls [FA]          | 8.2  | No  | 2 |
| 458.29220 | C27H39NO5    | [M+H]+    | 3.384 | ↓* | Fatty Acyls [FA]          | 8.2  | No  | 2 |
| 585.56070 | C38H74O2     | [M+Na]+   | 3.501 | ↓* | Fatty Acyls [FA]          | 8.3  | No  | 2 |
| 637.17960 | C29H39ClO11  | [M+K]+    | 3.454 | ↓* | Fatty Acyls [FA]          | 8.4  | No  | 1 |
| 393.22020 | C24H34O2     | [M+K]+    | 1.556 | ↓* | Fatty Acyls [FA]          | 8.4  | No  | 2 |
| 343.24870 | C19H34O5     | [M+H]+    | 0.725 | ↓* | Fatty Acyls [FA]          | 8.8  | No  | 2 |
| 467.03950 | C21H18O10    | [M-2H+K]- | 3.085 | ↑  | Fatty Acyls [FA]          | 9.0  | No  | 1 |
| 499.36130 | C26H52O7     | [M+Na]+   | 0.451 | ↓* | Fatty Acyls [FA]          | 9.1  | No  | 2 |
| 462.22920 | C23H37NO5S   | [M+Na]+   | 0.398 | ↓* | Fatty Acyls [FA]          | 9.4  | No  | 1 |
| 521.53150 | C35H68O2     | [M+H]+    | 3.344 | ↓* | Fatty Acyls [FA]          | 9.6  | No  | 1 |
| 539.17930 | C25H37ClO8   | [M+K]+    | 3.906 | ↓* | Fatty Acyls [FA]          | 9.7  | No  | 1 |
| 456.24120 | C23H37NO6S   | [M+H]+    | 1.725 | ↓* | Fatty Acyls [FA]          | 9.9  | No  | 1 |
| 403.36860 | C26H46N2O    | [M+H]+    | 0.590 | ↓* | Fatty Acyls [FA]          | 10.3 | No  | 3 |
| 702.54060 | C39H76NO7P   | [M+H]+    | 4.509 | ↑  | Fatty Acyls [FA]          | 13.0 | No  | 3 |
| 423.04900 | C20H18O8     | [M-2H+K]- | 1.822 | ↑  | Fatty Acyls [FA]          | 22.5 | No  | 1 |
| 713.51230 | C47H68O5     | [M+H]+    | 3.085 | ↓* | Glycerolipids [GL]        | 3.0  | No  | 3 |
| 577.49760 | C38H66O2     | [M+Na]+   | 2.684 | ↑  | Glycerolipids [GL]        | 3.2  | No  | 2 |
| 713.61080 | C46H80O5     | [M+H]+    | 3.362 | ↓* | Glycerolipids [GL]        | 3.3  | No  | 1 |
| 647.56080 | C41H74O5     | [M+H]+    | 1.005 | ↓* | Glycerolipids [GL]        | 4.1  | No  | 2 |
| 611.56130 | C38H74O5     | [M+H]+    | 0.247 | ↓* | Glycerolipids [GL]        | 4.4  | No  | 2 |
| 701.59090 | C41H80O8     | [M+H]+    | 3.201 | ↓* | Glycerolipids [GL]        | 4.5  | No  | 3 |
| 659.55850 | C42H74O5     | [M+H]+    | 4.474 | ↓* | Glycerolipids [GL]        | 4.8  | No  | 2 |
| 699.59160 | C45H78O5     | [M+H]+    | 1.645 | ↓* | Glycerolipids [GL]        | 4.8  | No  | 3 |
| 399.24920 | C23H36O4     | [M+Na]+   | 4.834 | ↓* | Glycerolipids [GL]        | 5.3  | No  | 1 |
| 609.54790 | C38H72O5     | [M+H]+    | 3.444 | ↓* | Glycerolipids [GL]        | 5.4  | No  | 3 |
| 667.47070 | C40H68O5     | [M+K]+    | 0.475 | ↓* | Glycerolipids [GL]        | 5.5  | No  | 2 |
| 671.55940 | C43H74O5     | [M+H]+    | 3.054 | ↓* | Glycerolipids [GL]        | 5.7  | No  | 2 |
| 635.54190 | C43H70O3     | [M+H]+    | 2.485 | ↓* | Glycerolipids [GL]        | 5.8  | No  | 2 |
| 655.50870 | C40H72O4     | [M+K]+    | 2.947 | ↓* | Glycerolipids [GL]        | 5.8  | No  | 2 |
| 675.44110 | C41H64O5     | [M+K]+    | 2.986 | ↓* | Glycerolipids [GL]        | 5.8  | No  | 1 |
| 639.55870 | C39H74O6     | [M+H]+    | 3.649 | ↓* | Glycerolipids [GL]        | 6.4  | No  | 1 |
| 689.60820 | C44H80O5     | [M+H]+    | 0.291 | ↓* | Glycerolipids [GL]        | 6.7  | No  | 3 |
| 613.48210 | C39H64O5     | [M+H]+    | 1.795 | ↓* | Glycerolipids [GL]        | 7.1  | No  | 2 |
| 667.53090 | C43H70O5     | [M+H]+    | 1.122 | ↓* | Glycerolipids [GL]        | 9.4  | No  | 1 |
| 708.48220 | C36H70NO10P  | [M+H]+    | 0.901 | ↓* | Glycerophospholipids [GP] | 3.0  | Yes | 2 |
| 695.44200 | C37H69O7P    | [M+K]+    | 0.286 | ↓* | Glycerophospholipids [GP] | 3.0  | Yes | 1 |
| 686.43890 | C34H66NO9P   | [M+Na]+   | 2.344 | ↓* | Glycerophospholipids [GP] | 3.0  | Yes | 3 |
| 636.46060 | C33H66NO8P   | [M+H]+    | 0.264 | ↑  | Glycerophospholipids [GP] | 3.1  | Yes | 1 |
| 678.46770 | C35H68NO9P   | [M+H]+    | 4.859 | ↓* | Glycerophospholipids [GP] | 3.1  | Yes | 3 |
| 703.43090 | C38H65O8P    | [M+Na]+   | 0.822 | ↓* | Glycerophospholipids [GP] | 3.1  | Yes | 1 |
| 686.39890 | C33H62NO10P  | [M+Na]+   | 2.922 | ↓* | Glycerophospholipids [GP] | 3.2  | Yes | 2 |
| 659.49960 | C37H71O7P    | [M+H]+    | 2.986 | ↓* | Glycerophospholipids [GP] | 3.2  | Yes | 3 |
| 520.34020 | C26H50NO7P   | [M+H]+    | 0.225 | ↓* | Glycerophospholipids [GP] | 3.2  | Yes | 2 |
| 687.42170 | C36H63O10P   | [M+H]+    | 2.930 | ↓* | Glycerophospholipids [GP] | 3.3  | Yes | 1 |
| 613.36880 | C29H57O11P   | [M+H]+    | 4.694 | ↓* | Glycerophospholipids [GP] | 3.3  | Yes | 2 |
| 493.29000 | C22H47O8P    | [M+Na]+   | 1.271 | ↓* | Glycerophospholipids [GP] | 3.4  | Yes | 1 |



|           |             |                     |       |    |                           |     |     |   |
|-----------|-------------|---------------------|-------|----|---------------------------|-----|-----|---|
| 393.23870 | C19H37O6P   | [M+H] <sup>+</sup>  | 4.839 | ↓* | Glycerophospholipids [GP] | 3.4 | Yes | 3 |
| 639.40240 | C35H59O8P   | [M+H] <sup>+</sup>  | 0.288 | ↓* | Glycerophospholipids [GP] | 3.5 | Yes | 2 |
| 701.54970 | C40H77O7P   | [M+H] <sup>+</sup>  | 1.683 | ↓* | Glycerophospholipids [GP] | 3.5 | Yes | 2 |
| 699.49840 | C39H71O8P   | [M+H] <sup>+</sup>  | 2.739 | ↓* | Glycerophospholipids [GP] | 3.5 | Yes | 2 |
| 607.47230 | C33H67O7P   | [M+H] <sup>+</sup>  | 3.343 | ↓* | Glycerophospholipids [GP] | 3.6 | Yes | 3 |
| 615.40010 | C33H59O8P   | [M+H] <sup>+</sup>  | 4.036 | ↓* | Glycerophospholipids [GP] | 3.6 | Yes | 1 |
| 703.37060 | C37H61O8P   | [M+K] <sup>+</sup>  | 4.999 | ↓* | Glycerophospholipids [GP] | 3.6 | Yes | 1 |
| 672.45829 | C36H66NO8P  | [M+H] <sup>+</sup>  | 3.187 | ↓* | Glycerophospholipids [GP] | 3.6 | Yes | 1 |
| 664.45810 | C34H66NO9P  | [M+H] <sup>+</sup>  | 4.143 | ↓* | Glycerophospholipids [GP] | 3.6 | Yes | 3 |
| 714.50905 | C39H72NO8P  | [M+H] <sup>+</sup>  | 2.330 | ↓* | Glycerophospholipids [GP] | 3.7 | Yes | 2 |
| 630.41160 | C31H62NO8P  | [M+Na] <sup>+</sup> | 0.831 | ↓* | Glycerophospholipids [GP] | 3.7 | Yes | 3 |
| 502.32890 | C24H50NO6P  | [M+Na] <sup>+</sup> | 3.094 | ↓* | Glycerophospholipids [GP] | 3.7 | Yes | 3 |
| 705.48840 | C41H69O7P   | [M+H] <sup>+</sup>  | 3.517 | ↓* | Glycerophospholipids [GP] | 3.8 | Yes | 3 |
| 387.18067 | C22H26O6    | [M+H] <sup>+</sup>  | 0.243 | ↑* | Glycerophospholipids [GP] | 3.9 | Yes | 1 |
| 673.51970 | C38H73O7P   | [M+H] <sup>+</sup>  | 3.684 | ↓* | Glycerophospholipids [GP] | 3.9 | Yes | 2 |
| 535.24140 | C23H45O9P   | [M+K] <sup>+</sup>  | 4.540 | ↓* | Glycerophospholipids [GP] | 3.9 | Yes | 2 |
| 639.42220 | C32H63O10P  | [M+H] <sup>+</sup>  | 2.368 | ↓* | Glycerophospholipids [GP] | 4.0 | Yes | 1 |
| 483.22900 | C23H41O6P   | [M+K] <sup>+</sup>  | 2.514 | ↓* | Glycerophospholipids [GP] | 4.0 | Yes | 1 |
| 684.52990 | C39H74NO6P  | [M+H] <sup>+</sup>  | 4.825 | ↓* | Glycerophospholipids [GP] | 4.1 | Yes | 1 |
| 667.49040 | C35H71O9P   | [M+H] <sup>+</sup>  | 1.497 | ↓* | Glycerophospholipids [GP] | 4.1 | Yes | 2 |
| 686.45180 | C35H70NO7P  | [M+K] <sup>+</sup>  | 1.310 | ↓* | Glycerophospholipids [GP] | 4.1 | Yes | 3 |
| 446.22800 | C19H38NO7P  | [M+Na] <sup>+</sup> | 0.809 | ↓* | Glycerophospholipids [GP] | 4.3 | Yes | 1 |
| 655.37240 | C33H61O8P   | [M+K] <sup>+</sup>  | 2.618 | ↓* | Glycerophospholipids [GP] | 4.3 | Yes | 2 |
| 712.49000 | C39H70NO8P  | [M+H] <sup>+</sup>  | 2.431 | ↓* | Glycerophospholipids [GP] | 4.3 | Yes | 3 |
| 668.42850 | C34H64NO8P  | [M+Na] <sup>+</sup> | 2.654 | ↓* | Glycerophospholipids [GP] | 4.3 | Yes | 1 |
| 620.42920 | C32H62NO8P  | [M+H] <sup>+</sup>  | 0.110 | ↓* | Glycerophospholipids [GP] | 4.3 | Yes | 1 |
| 425.23040 | C19H37O8P   | [M+H] <sup>+</sup>  | 0.078 | ↓* | Glycerophospholipids [GP] | 4.4 | Yes | 2 |
| 670.47910 | C35H70NO7P  | [M+Na] <sup>+</sup> | 0.506 | ↓* | Glycerophospholipids [GP] | 4.4 | Yes | 3 |
| 491.23810 | C21H41O9P   | [M+Na] <sup>+</sup> | 1.002 | ↓* | Glycerophospholipids [GP] | 4.4 | Yes | 1 |
| 570.28070 | C28H44NO9P  | [M+H] <sup>+</sup>  | 4.379 | ↓* | Glycerophospholipids [GP] | 4.5 | Yes | 1 |
| 673.47970 | C37H69O8P   | [M+H] <sup>+</sup>  | 1.684 | ↓* | Glycerophospholipids [GP] | 4.5 | Yes | 3 |
| 552.43820 | C29H62NO6P  | [M+H] <sup>+</sup>  | 1.995 | ↓* | Glycerophospholipids [GP] | 4.5 | Yes | 3 |
| 691.42980 | C37H65O8P   | [M+Na] <sup>+</sup> | 2.427 | ↓* | Glycerophospholipids [GP] | 4.5 | Yes | 1 |
| 677.45150 | C37H67O7P   | [M+Na] <sup>+</sup> | 1.052 | ↓* | Glycerophospholipids [GP] | 4.5 | Yes | 3 |
| 465.18810 | C18H35O10P  | [M+Na] <sup>+</sup> | 3.317 | ↓* | Glycerophospholipids [GP] | 4.5 | Yes | 1 |
| 515.31230 | C25H49O7P   | [M+Na] <sup>+</sup> | 1.820 | ↓* | Glycerophospholipids [GP] | 4.5 | Yes | 2 |
| 650.43950 | C33H64NO9P  | [M+H] <sup>+</sup>  | 0.303 | ↓* | Glycerophospholipids [GP] | 4.6 | Yes | 2 |
| 695.50020 | C38H73O7P   | [M+Na] <sup>+</sup> | 1.491 | ↓* | Glycerophospholipids [GP] | 4.6 | Yes | 2 |
| 623.32180 | C29H51O12P  | [M+H] <sup>+</sup>  | 3.461 | ↓* | Glycerophospholipids [GP] | 4.6 | Yes | 2 |
| 708.52020 | C37H74NO9P  | [M+H] <sup>+</sup>  | 3.178 | ↓* | Glycerophospholipids [GP] | 4.6 | Yes | 2 |
| 699.41850 | C35H65O10P  | [M+Na] <sup>+</sup> | 4.015 | ↓* | Glycerophospholipids [GP] | 4.6 | Yes | 1 |
| 455.24130 | C20H39O9P   | [M+H] <sup>+</sup>  | 0.663 | ↓* | Glycerophospholipids [GP] | 4.6 | Yes | 2 |
| 703.39200 | C34H65O10P  | [M+K] <sup>+</sup>  | 4.615 | ↓* | Glycerophospholipids [GP] | 4.7 | Yes | 2 |
| 510.31880 | C24H48NO8P  | [M+H] <sup>+</sup>  | 1.532 | ↓* | Glycerophospholipids [GP] | 4.7 | Yes | 1 |
| 608.24140 | C28H44NO9P  | [M+K] <sup>+</sup>  | 3.816 | ↓* | Glycerophospholipids [GP] | 4.9 | Yes | 1 |
| 564.27060 | C24H48NO9P  | [M+K] <sup>+</sup>  | 0.392 | ↓* | Glycerophospholipids [GP] | 4.9 | Yes | 1 |
| 600.40150 | C30H60NO7P  | [M+Na] <sup>+</sup> | 1.647 | ↓* | Glycerophospholipids [GP] | 4.9 | Yes | 2 |
| 618.39160 | C30H62NO7P  | [M+K] <sup>+</sup>  | 2.427 | ↓* | Glycerophospholipids [GP] | 5.0 | Yes | 2 |
| 602.41780 | C30H62NO7P  | [M+Na] <sup>+</sup> | 2.721 | ↓* | Glycerophospholipids [GP] | 5.0 | Yes | 2 |
| 544.33840 | C28H50NO7P  | [M+H] <sup>+</sup>  | 3.522 | ↓* | Glycerophospholipids [GP] | 5.1 | Yes | 1 |
| 678.57910 | C38H80NO6P  | [M+H] <sup>+</sup>  | 1.552 | ↓* | Glycerophospholipids [GP] | 5.1 | Yes | 2 |
| 671.46220 | C37H67O8P   | [M+H] <sup>+</sup>  | 4.444 | ↓* | Glycerophospholipids [GP] | 5.1 | Yes | 3 |
| 592.29890 | C26H52NO9P  | [M+K] <sup>+</sup>  | 4.692 | ↓* | Glycerophospholipids [GP] | 5.1 | Yes | 1 |
| 697.47910 | C39H69O8P   | [M+H] <sup>+</sup>  | 2.486 | ↓* | Glycerophospholipids [GP] | 5.1 | Yes | 2 |
| 558.39120 | C28H58NO6P  | [M+Na] <sup>+</sup> | 2.246 | ↓* | Glycerophospholipids [GP] | 5.2 | Yes | 3 |
| 579.43910 | C31H63O7P   | [M+H] <sup>+</sup>  | 0.226 | ↓* | Glycerophospholipids [GP] | 5.2 | Yes | 3 |
| 669.44770 | C37H65O8P   | [M+H] <sup>+</sup>  | 2.740 | ↓* | Glycerophospholipids [GP] | 5.3 | Yes | 2 |
| 646.37060 | C30H58NO10P | [M+Na] <sup>+</sup> | 1.538 | ↓* | Glycerophospholipids [GP] | 5.3 | Yes | 3 |
| 584.23900 | C26H44NO9P  | [M+K] <sup>+</sup>  | 0.135 | ↓* | Glycerophospholipids [GP] | 5.3 | Yes | 1 |
| 575.31190 | C27H53O8P   | [M+K] <sup>+</sup>  | 0.669 | ↓* | Glycerophospholipids [GP] | 5.3 | Yes | 3 |
| 696.45760 | C38H66NO8P  | [M+H] <sup>+</sup>  | 4.066 | ↓* | Glycerophospholipids [GP] | 5.4 | Yes | 1 |
| 496.37820 | C25H54NO6P  | [M+H] <sup>+</sup>  | 3.018 | ↓* | Glycerophospholipids [GP] | 5.4 | Yes | 3 |
| 536.40760 | C28H58NO6P  | [M+H] <sup>+</sup>  | 0.749 | ↓* | Glycerophospholipids [GP] | 5.4 | Yes | 3 |
| 661.47800 | C36H69O8P   | [M+H] <sup>+</sup>  | 4.284 | ↓* | Glycerophospholipids [GP] | 5.5 | Yes | 1 |
| 635.31830 | C28H53O12P  | [M+Na] <sup>+</sup> | 1.672 | ↓* | Glycerophospholipids [GP] | 5.5 | Yes | 2 |
| 641.36050 | C32H59O8P   | [M+K] <sup>+</sup>  | 3.171 | ↓* | Glycerophospholipids [GP] | 5.5 | Yes | 1 |
| 478.23150 | C20H42NO7P  | [M+K] <sup>+</sup>  | 4.389 | ↓* | Glycerophospholipids [GP] | 5.6 | Yes | 3 |
| 594.37800 | C29H56NO9P  | [M+H] <sup>+</sup>  | 1.519 | ↓* | Glycerophospholipids [GP] | 5.6 | Yes | 2 |
| 619.47060 | C34H67O7P   | [M+H] <sup>+</sup>  | 0.534 | ↓* | Glycerophospholipids [GP] | 5.6 | Yes | 1 |
| 578.38090 | C29H56NO8P  | [M+H] <sup>+</sup>  | 2.217 | ↓* | Glycerophospholipids [GP] | 5.6 | Yes | 3 |
| 709.53770 | C38H77O9P   | [M+H] <sup>+</sup>  | 0.915 | ↓* | Glycerophospholipids [GP] | 5.6 | Yes | 2 |
| 522.26170 | C25H42NO7P  | [M+Na] <sup>+</sup> | 3.904 | ↓* | Glycerophospholipids [GP] | 5.6 | Yes | 1 |
| 617.27100 | C27H47O12P  | [M+Na] <sup>+</sup> | 1.155 | ↓* | Glycerophospholipids [GP] | 5.6 | Yes | 2 |
| 442.22070 | C18H36NO9P  | [M+H] <sup>+</sup>  | 0.233 | ↓* | Glycerophospholipids [GP] | 5.7 | Yes | 2 |
| 518.31970 | C24H50NO7P  | [M+Na] <sup>+</sup> | 4.941 | ↓* | Glycerophospholipids [GP] | 5.7 | Yes | 2 |
| 504.34230 | C24H52NO6P  | [M+Na] <sup>+</sup> | 1.380 | ↓* | Glycerophospholipids [GP] | 5.7 | Yes | 1 |
| 648.49840 | C35H70NO7P  | [M+H] <sup>+</sup>  | 2.441 | ↓* | Glycerophospholipids [GP] | 5.7 | Yes | 1 |
| 405.19980 | C17H35O7P   | [M+Na] <sup>+</sup> | 4.965 | ↓* | Glycerophospholipids [GP] | 5.8 | Yes | 1 |
| 644.37040 | C31H60NO8P  | [M+K] <sup>+</sup>  | 1.608 | ↓* | Glycerophospholipids [GP] | 5.9 | Yes | 3 |
| 585.33950 | C27H53O11P  | [M+H] <sup>+</sup>  | 1.502 | ↓* | Glycerophospholipids [GP] | 6.0 | Yes | 3 |

|           |             |                     |       |    |                           |      |     |   |
|-----------|-------------|---------------------|-------|----|---------------------------|------|-----|---|
| 475.27870 | C22H45O7P   | [M+Na] <sup>+</sup> | 2.866 | ↓* | Glycerophospholipids [GP] | 6.0  | Yes | 2 |
| 651.40240 | C34H61O8P   | [M+Na] <sup>+</sup> | 3.411 | ↓* | Glycerophospholipids [GP] | 6.1  | Yes | 1 |
| 578.34800 | C28H52NO9P  | [M+H] <sup>+</sup>  | 3.809 | ↓* | Glycerophospholipids [GP] | 6.1  | Yes | 2 |
| 443.24170 | C19H39O9P   | [M+H] <sup>+</sup>  | 1.584 | ↓* | Glycerophospholipids [GP] | 6.1  | Yes | 1 |
| 621.30220 | C29H49O12P  | [M+H] <sup>+</sup>  | 2.886 | ↓* | Glycerophospholipids [GP] | 6.2  | Yes | 1 |
| 677.44100 | C35H65O10P  | [M+H] <sup>+</sup>  | 2.415 | ↓* | Glycerophospholipids [GP] | 6.2  | Yes | 2 |
| 690.50820 | C37H72NO8P  | [M+H] <sup>+</sup>  | 1.185 | ↑  | Glycerophospholipids [GP] | 6.2  | Yes | 2 |
| 355.18820 | C15H31O7P   | [M+H] <sup>+</sup>  | 1.036 | ↓* | Glycerophospholipids [GP] | 6.3  | Yes | 2 |
| 507.24810 | C22H45O8P   | [M+K] <sup>+</sup>  | 1.607 | ↓* | Glycerophospholipids [GP] | 6.3  | Yes | 2 |
| 596.31020 | C29H52NO7P  | [M+K] <sup>+</sup>  | 2.765 | ↓* | Glycerophospholipids [GP] | 6.3  | Yes | 3 |
| 642.41170 | C32H62NO8P  | [M+Na] <sup>+</sup> | 0.971 | ↓* | Glycerophospholipids [GP] | 6.4  | Yes | 2 |
| 565.24060 | C23H43O12P  | [M+Na] <sup>+</sup> | 2.854 | ↓* | Glycerophospholipids [GP] | 6.5  | Yes | 1 |
| 580.30060 | C28H48NO8P  | [M+Na] <sup>+</sup> | 1.596 | ↓* | Glycerophospholipids [GP] | 6.5  | Yes | 3 |
| 549.31840 | C25H51O9P   | [M+Na] <sup>+</sup> | 2.836 | ↓* | Glycerophospholipids [GP] | 6.7  | Yes | 3 |
| 562.36210 | C27H58NO6P  | [M+K] <sup>+</sup>  | 3.172 | ↓* | Glycerophospholipids [GP] | 6.7  | Yes | 1 |
| 495.19050 | C23H37O7P   | [M+K] <sup>+</sup>  | 1.817 | ↓* | Glycerophospholipids [GP] | 6.8  | Yes | 1 |
| 653.35780 | C33H59O8P   | [M+K] <sup>+</sup>  | 1.019 | ↓* | Glycerophospholipids [GP] | 6.8  | Yes | 1 |
| 665.41800 | C37H61O8P   | [M+H] <sup>+</sup>  | 0.352 | ↓* | Glycerophospholipids [GP] | 6.8  | Yes | 3 |
| 478.26770 | C21H46NO6P  | [M+K] <sup>+</sup>  | 4.776 | ↓* | Glycerophospholipids [GP] | 6.9  | Yes | 1 |
| 645.30200 | C31H49O12P  | [M+H] <sup>+</sup>  | 3.088 | ↓* | Glycerophospholipids [GP] | 6.9  | Yes | 1 |
| 599.31870 | C27H51O12P  | [M+H] <sup>+</sup>  | 1.573 | ↓* | Glycerophospholipids [GP] | 7.0  | Yes | 2 |
| 583.28960 | C26H47O12P  | [M+H] <sup>+</sup>  | 2.155 | ↓* | Glycerophospholipids [GP] | 7.0  | Yes | 3 |
| 469.23190 | C22H39O7P   | [M+Na] <sup>+</sup> | 2.583 | ↓* | Glycerophospholipids [GP] | 7.0  | Yes | 2 |
| 630.44790 | C32H66NO7P  | [M+Na] <sup>+</sup> | 0.696 | ↓* | Glycerophospholipids [GP] | 7.2  | Yes | 2 |
| 538.29170 | C26H46NO7P  | [M+Na] <sup>+</sup> | 1.373 | ↓* | Glycerophospholipids [GP] | 7.2  | Yes | 1 |
| 709.47890 | C40H69O8P   | [M+H] <sup>+</sup>  | 2.726 | ↓* | Glycerophospholipids [GP] | 7.2  | Yes | 2 |
| 470.24980 | C20H40NO9P  | [M+H] <sup>+</sup>  | 4.459 | ↓* | Glycerophospholipids [GP] | 7.3  | Yes | 3 |
| 522.22190 | C21H42NO9P  | [M+K] <sup>+</sup>  | 2.928 | ↓* | Glycerophospholipids [GP] | 7.5  | Yes | 3 |
| 709.46000 | C38H71O7P   | [M+K] <sup>+</sup>  | 3.593 | ↓* | Glycerophospholipids [GP] | 7.5  | Yes | 3 |
| 453.29970 | C22H45O7P   | [M+H] <sup>+</sup>  | 3.490 | ↓* | Glycerophospholipids [GP] | 7.5  | Yes | 2 |
| 643.47130 | C36H67O7P   | [M+H] <sup>+</sup>  | 1.602 | ↓* | Glycerophospholipids [GP] | 7.6  | Yes | 1 |
| 637.38200 | C33H59O8P   | [M+Na] <sup>+</sup> | 3.966 | ↓* | Glycerophospholipids [GP] | 7.6  | Yes | 1 |
| 595.28760 | C27H47O12P  | [M+H] <sup>+</sup>  | 1.248 | ↓* | Glycerophospholipids [GP] | 7.7  | Yes | 1 |
| 568.27900 | C27H48NO7P  | [M+K] <sup>+</sup>  | 2.726 | ↓* | Glycerophospholipids [GP] | 7.7  | Yes | 3 |
| 675.36140 | C32H61O10P  | [M+K] <sup>+</sup>  | 3.770 | ↓* | Glycerophospholipids [GP] | 7.9  | Yes | 3 |
| 595.23080 | C24H45O12P  | [M+K] <sup>+</sup>  | 3.738 | ↓* | Glycerophospholipids [GP] | 8.0  | Yes | 3 |
| 653.43800 | C33H65O10P  | [M+H] <sup>+</sup>  | 2.087 | ↓* | Glycerophospholipids [GP] | 8.0  | Yes | 1 |
| 441.23790 | C21H39O6P   | [M+Na] <sup>+</sup> | 0.673 | ↓* | Glycerophospholipids [GP] | 8.0  | Yes | 1 |
| 421.27020 | C21H41O6P   | [M+H] <sup>+</sup>  | 4.043 | ↓* | Glycerophospholipids [GP] | 8.1  | Yes | 3 |
| 590.34070 | C27H54NO9P  | [M+Na] <sup>+</sup> | 4.558 | ↓* | Glycerophospholipids [GP] | 8.4  | Yes | 3 |
| 550.21990 | C22H42NO10P | [M+K] <sup>+</sup>  | 2.828 | ↓* | Glycerophospholipids [GP] | 8.5  | Yes | 1 |
| 569.38160 | C28H57O9P   | [M+H] <sup>+</sup>  | 0.437 | ↓* | Glycerophospholipids [GP] | 8.5  | Yes | 1 |
| 467.31170 | C23H47O7P   | [M+H] <sup>+</sup>  | 4.425 | ↓* | Glycerophospholipids [GP] | 8.6  | Yes | 1 |
| 454.25810 | C20H40NO8P  | [M+H] <sup>+</sup>  | 2.461 | ↓* | Glycerophospholipids [GP] | 8.6  | Yes | 3 |
| 560.36930 | C27H56NO7P  | [M+Na] <sup>+</sup> | 0.159 | ↓* | Glycerophospholipids [GP] | 8.7  | Yes | 2 |
| 678.50851 | C36H72NO8P  | [M+H] <sup>+</sup>  | 1.664 | ↑  | Glycerophospholipids [GP] | 8.7  | Yes | 3 |
| 593.26880 | C25H47O12P  | [M+Na] <sup>+</sup> | 2.506 | ↓* | Glycerophospholipids [GP] | 8.9  | Yes | 1 |
| 653.41870 | C36H61O8P   | [M+H] <sup>+</sup>  | 0.713 | ↓* | Glycerophospholipids [GP] | 9.5  | Yes | 3 |
| 577.30910 | C26H51O10P  | [M+Na] <sup>+</sup> | 4.602 | ↓* | Glycerophospholipids [GP] | 9.8  | Yes | 1 |
| 485.28880 | C22H45O9P   | [M+H] <sup>+</sup>  | 1.756 | ↓* | Glycerophospholipids [GP] | 10.3 | Yes | 2 |
| 711.49890 | C40H71O8P   | [M+H] <sup>+</sup>  | 3.396 | ↓* | Glycerophospholipids [GP] | 14.4 | Yes | 2 |
| 629.32930 | C33H50O10   | [M+Na] <sup>+</sup> | 1.382 | ↓* | Polyketides [PK]          | 5.3  | No  | 3 |
| 702.50840 | C38H72NO8P  | [M+H] <sup>+</sup>  | 1.449 | ↑  | Prenol Lipids [PR]        | 3.0  | No  | 2 |
| 459.27160 | C25H40O6    | [M+Na] <sup>+</sup> | 1.437 | ↓* | Prenol Lipids [PR]        | 3.2  | No  | 2 |
| 690.49207 | C38H69NO8   | [M+Na] <sup>+</sup> | 0.028 | ↑* | Prenol Lipids [PR]        | 3.4  | No  | 1 |
| 543.44020 | C35H58O4    | [M+H] <sup>+</sup>  | 2.090 | ↓* | Prenol Lipids [PR]        | 3.4  | No  | 2 |
| 662.47800 | C35H68NO8P  | [M+H] <sup>+</sup>  | 2.895 | ↑  | Prenol Lipids [PR]        | 3.4  | No  | 2 |
| 708.54200 | C41H73NO8   | [M+H] <sup>+</sup>  | 0.783 | ↓* | Prenol Lipids [PR]        | 3.5  | No  | 1 |
| 593.54030 | C40H74      | [M+K] <sup>+</sup>  | 4.141 | ↓* | Prenol Lipids [PR]        | 3.5  | No  | 1 |
| 684.48120 | C40H63N5O3  | [M+Na] <sup>+</sup> | 2.424 | ↓* | Prenol Lipids [PR]        | 3.6  | No  | 1 |
| 607.42900 | C41H60O     | [M+K] <sup>+</sup>  | 1.444 | ↓  | Prenol Lipids [PR]        | 3.8  | No  | 1 |
| 519.20120 | C30H30O8    | [M+H] <sup>+</sup>  | 1.341 | ↓* | Prenol Lipids [PR]        | 4.0  | No  | 3 |
| 607.39180 | C40H56O2    | [M+K] <sup>+</sup>  | 0.102 | ↑  | Prenol Lipids [PR]        | 4.2  | No  | 3 |
| 549.42960 | C35H58O3    | [M+Na] <sup>+</sup> | 2.248 | ↓* | Prenol Lipids [PR]        | 4.4  | No  | 3 |
| 309.21910 | C20H30O     | [M+Na] <sup>+</sup> | 1.083 | ↓* | Prenol Lipids [PR]        | 4.4  | No  | 3 |
| 633.40150 | C36H56O9    | [M+H] <sup>+</sup>  | 1.956 | ↓* | Prenol Lipids [PR]        | 4.8  | No  | 1 |
| 705.38070 | C36H58O12   | [M+Na] <sup>+</sup> | 2.694 | ↓* | Prenol Lipids [PR]        | 4.8  | No  | 3 |
| 503.21870 | C29H36O5    | [M+K] <sup>+</sup>  | 2.550 | ↓* | Prenol Lipids [PR]        | 4.8  | No  | 1 |
| 599.40920 | C40H54O4    | [M+H] <sup>+</sup>  | 1.395 | ↓* | Prenol Lipids [PR]        | 5.1  | No  | 1 |
| 397.31060 | C27H40O2    | [M+H] <sup>+</sup>  | 0.141 | ↓* | Prenol Lipids [PR]        | 5.1  | No  | 2 |
| 659.43040 | C42H58O6    | [M+H] <sup>+</sup>  | 1.162 | ↓* | Prenol Lipids [PR]        | 5.1  | No  | 3 |
| 481.25930 | C29H36O6    | [M+H] <sup>+</sup>  | 0.590 | ↓* | Prenol Lipids [PR]        | 5.2  | No  | 3 |
| 601.46000 | C41H60O3    | [M+H] <sup>+</sup>  | 3.443 | ↓* | Prenol Lipids [PR]        | 5.2  | No  | 3 |
| 539.46200 | C40H58      | [M+H] <sup>+</sup>  | 0.601 | ↓* | Prenol Lipids [PR]        | 5.2  | No  | 3 |
| 639.37850 | C40H56O4    | [M+K] <sup>+</sup>  | 4.798 | ↓* | Prenol Lipids [PR]        | 5.3  | No  | 2 |
| 575.40130 | C40H56      | [M+K] <sup>+</sup>  | 1.057 | ↓* | Prenol Lipids [PR]        | 5.3  | No  | 2 |
| 585.40860 | C38H58O2    | [M+K] <sup>+</sup>  | 2.070 | ↓* | Prenol Lipids [PR]        | 5.4  | No  | 3 |
| 497.34160 | C30H50O3    | [M+K] <sup>+</sup>  | 3.814 | ↓* | Prenol Lipids [PR]        | 5.4  | No  | 1 |
| 568.46890 | C35H63NO3   | [M+Na] <sup>+</sup> | 2.927 | ↓* | Prenol Lipids [PR]        | 5.5  | No  | 1 |
| 563.38970 | C40H50O2    | [M+H] <sup>+</sup>  | 1.409 | ↓* | Prenol Lipids [PR]        | 5.5  | No  | 2 |

|           |             |                     |       |    |                    |      |     |   |
|-----------|-------------|---------------------|-------|----|--------------------|------|-----|---|
| 545.50960 | C40H64      | [M+H] <sup>+</sup>  | 1.785 | ↓* | Prenol Lipids [PR] | 5.5  | No  | 2 |
| 373.30920 | C25H40O2    | [M+H] <sup>+</sup>  | 3.900 | ↓* | Prenol Lipids [PR] | 5.6  | No  | 1 |
| 521.33970 | C35H46O2    | [M+Na] <sup>+</sup> | 0.288 | ↓* | Prenol Lipids [PR] | 5.7  | No  | 1 |
| 561.44220 | C40H58      | [M+Na] <sup>+</sup> | 2.529 | ↓* | Prenol Lipids [PR] | 5.7  | No  | 3 |
| 617.36180 | C40H50O4    | [M+Na] <sup>+</sup> | 1.814 | ↓* | Prenol Lipids [PR] | 5.8  | No  | 2 |
| 605.41050 | C41H58O     | [M+K] <sup>+</sup>  | 3.259 | ↓* | Prenol Lipids [PR] | 5.9  | No  | 3 |
| 425.21910 | C22H32O8    | [M+H] <sup>+</sup>  | 3.655 | ↓* | Prenol Lipids [PR] | 6.0  | No  | 2 |
| 609.42760 | C40H58O3    | [M+Na] <sup>+</sup> | 1.255 | ↓* | Prenol Lipids [PR] | 6.0  | No  | 2 |
| 301.14180 | C16H22O4    | [M+Na] <sup>+</sup> | 0.734 | ↓* | Prenol Lipids [PR] | 6.1  | No  | 2 |
| 295.23920 | C20H32      | [M+Na] <sup>+</sup> | 3.285 | ↓* | Prenol Lipids [PR] | 6.2  | No  | 2 |
| 479.23050 | C20H42O7P2  | [M+Na] <sup>+</sup> | 0.313 | ↓* | Prenol Lipids [PR] | 6.3  | No  | 1 |
| 557.22200 | C26H36O13   | [M+H] <sup>+</sup>  | 2.550 | ↓* | Prenol Lipids [PR] | 6.5  | No  | 1 |
| 625.28020 | C30H52O7P2  | [M+K] <sup>+</sup>  | 3.739 | ↓* | Prenol Lipids [PR] | 6.7  | No  | 1 |
| 447.33880 | C30H48      | [M+K] <sup>+</sup>  | 1.136 | ↓* | Prenol Lipids [PR] | 6.7  | No  | 1 |
| 565.45800 | C36H62O3    | [M+Na] <sup>+</sup> | 2.945 | ↓* | Prenol Lipids [PR] | 6.7  | No  | 2 |
| 481.38110 | C31H54O     | [M+K] <sup>+</sup>  | 0.152 | ↓* | Prenol Lipids [PR] | 6.8  | No  | 1 |
| 357.11820 | C16H20O9    | [M+H] <sup>+</sup>  | 1.008 | ↓* | Prenol Lipids [PR] | 7.3  | No  | 2 |
| 521.28090 | C25H46O7P2  | [M+H] <sup>+</sup>  | 2.291 | ↓* | Prenol Lipids [PR] | 7.3  | No  | 2 |
| 639.38940 | C36H56O8    | [M+Na] <sup>+</sup> | 3.300 | ↓* | Prenol Lipids [PR] | 7.5  | No  | 2 |
| 557.40980 | C40H54      | [M+Na] <sup>+</sup> | 4.521 | ↓* | Prenol Lipids [PR] | 7.7  | No  | 1 |
| 583.45070 | C41H58O2    | [M+H] <sup>+</sup>  | 1.381 | ↓* | Prenol Lipids [PR] | 7.7  | No  | 1 |
| 573.38820 | C40H54      | [M+K] <sup>+</sup>  | 3.387 | ↓* | Prenol Lipids [PR] | 8.0  | No  | 3 |
| 511.31810 | C30H48O4    | [M+K] <sup>+</sup>  | 1.698 | ↓* | Prenol Lipids [PR] | 8.1  | No  | 3 |
| 495.39840 | C32H56O     | [M+K] <sup>+</sup>  | 3.183 | ↓* | Prenol Lipids [PR] | 8.1  | No  | 1 |
| 363.20760 | C23H32O     | [M+K] <sup>+</sup>  | 3.918 | ↓* | Prenol Lipids [PR] | 8.3  | No  | 2 |
| 441.29150 | C30H42      | [M+K] <sup>+</sup>  | 1.944 | ↓* | Prenol Lipids [PR] | 8.6  | No  | 2 |
| 595.33850 | C30H53O8P   | [M+Na] <sup>+</sup> | 1.550 | ↓* | Prenol Lipids [PR] | 8.8  | No  | 2 |
| 489.35890 | C30H48O5    | [M+H] <sup>+</sup>  | 1.837 | ↓* | Prenol Lipids [PR] | 9.0  | No  | 3 |
| 592.52840 | C35H71NO4   | [M+Na] <sup>+</sup> | 0.542 | ↓* | Sphingolipids [SP] | 3.0  | No  | 3 |
| 698.64130 | C44H85NO3   | [M+Na] <sup>+</sup> | 2.024 | ↓* | Sphingolipids [SP] | 3.2  | No  | 1 |
| 536.44210 | C31H63NO3   | [M+K] <sup>+</sup>  | 4.478 | ↓* | Sphingolipids [SP] | 3.5  | No  | 3 |
| 392.34940 | C23H47NO2   | [M+Na] <sup>+</sup> | 2.674 | ↓* | Sphingolipids [SP] | 3.5  | No  | 2 |
| 620.49900 | C34H70NO6P  | [M+H] <sup>+</sup>  | 4.677 | ↓* | Sphingolipids [SP] | 3.7  | No  | 3 |
| 454.27810 | C22H41NO7   | [M+Na] <sup>+</sup> | 0.059 | ↓* | Sphingolipids [SP] | 3.8  | No  | 3 |
| 696.68780 | C44H89NO4   | [M+H] <sup>+</sup>  | 1.170 | ↓* | Sphingolipids [SP] | 4.1  | No  | 2 |
| 418.27870 | C21H39NO7   | [M+H] <sup>+</sup>  | 4.253 | ↓* | Sphingolipids [SP] | 4.3  | No  | 3 |
| 688.60170 | C42H83NO3   | [M+K] <sup>+</sup>  | 1.014 | ↓* | Sphingolipids [SP] | 4.3  | No  | 1 |
| 687.54160 | C38H75N2O6P | [M+H] <sup>+</sup>  | 3.638 | ↓* | Sphingolipids [SP] | 4.4  | No  | 3 |
| 600.38060 | C30H60NO6P  | [M+K] <sup>+</sup>  | 1.776 | ↓* | Sphingolipids [SP] | 4.8  | No  | 2 |
| 636.62840 | C41H81NO3   | [M+H] <sup>+</sup>  | 1.681 | ↓* | Sphingolipids [SP] | 4.8  | No  | 3 |
| 701.55770 | C39H77N2O6P | [M+H] <sup>+</sup>  | 2.923 | ↓* | Sphingolipids [SP] | 4.9  | No  | 2 |
| 317.05040 | C12H23BrO2  | [M+K] <sup>+</sup>  | 4.563 | ↑* | Sphingolipids [SP] | 5.0  | No  | 2 |
| 608.50030 | C35H71NO4   | [M+K] <sup>+</sup>  | 2.822 | ↓* | Sphingolipids [SP] | 5.1  | No  | 2 |
| 562.45820 | C33H65NO3   | [M+K] <sup>+</sup>  | 3.470 | ↓* | Sphingolipids [SP] | 5.2  | No  | 1 |
| 520.46900 | C31H63NO3   | [M+Na] <sup>+</sup> | 3.005 | ↓* | Sphingolipids [SP] | 5.6  | No  | 3 |
| 318.23990 | C18H33NO2   | [M+Na] <sup>+</sup> | 3.136 | ↓* | Sphingolipids [SP] | 5.8  | No  | 2 |
| 663.54130 | C36H75N2O6P | [M+H] <sup>+</sup>  | 4.221 | ↓* | Sphingolipids [SP] | 5.8  | No  | 3 |
| 348.23090 | C19H35NO2   | [M+K] <sup>+</sup>  | 1.189 | ↓* | Sphingolipids [SP] | 5.9  | No  | 1 |
| 714.36850 | C33H57NO14  | [M+Na] <sup>+</sup> | 1.149 | ↓* | Sphingolipids [SP] | 6.0  | No  | 1 |
| 644.54080 | C39H75NO3   | [M+K] <sup>+</sup>  | 3.720 | ↓* | Sphingolipids [SP] | 6.0  | No  | 2 |
| 352.25130 | C17H37NO4S  | [M+H] <sup>+</sup>  | 2.433 | ↓* | Sphingolipids [SP] | 6.1  | No  | 3 |
| 451.33070 | C22H47N2O5P | [M+H] <sup>+</sup>  | 1.360 | ↓* | Sphingolipids [SP] | 6.3  | No  | 3 |
| 645.53180 | C36H73N2O5P | [M+H] <sup>+</sup>  | 2.689 | ↓* | Sphingolipids [SP] | 7.0  | No  | 2 |
| 648.63210 | C42H81NO3   | [M+H] <sup>+</sup>  | 4.055 | ↓* | Sphingolipids [SP] | 7.4  | No  | 1 |
| 504.44080 | C30H59NO3   | [M+Na] <sup>+</sup> | 3.045 | ↓* | Sphingolipids [SP] | 8.4  | No  | 1 |
| 684.64860 | C42H85NO5   | [M+H] <sup>+</sup>  | 2.921 | ↓* | Sphingolipids [SP] | 8.7  | No  | 3 |
| 664.49200 | C35H70NO8P  | [M+H] <sup>+</sup>  | 0.403 | ↑  | Sphingolipids [SP] | 11.4 | No  | 3 |
| 604.50790 | C36H71NO3   | [M+K] <sup>+</sup>  | 1.320 | ↓* | Sphingolipids [SP] | 11.6 | No  | 3 |
| 685.38980 | C37H58O10   | [M+Na] <sup>+</sup> | 4.333 | ↓* | Sterol Lipids [ST] | 3.0  | Yes | 1 |
| 481.30910 | C29H46O3    | [M+K] <sup>+</sup>  | 1.448 | ↓* | Sterol Lipids [ST] | 3.2  | Yes | 3 |
| 699.54880 | C46H76O2    | [M+K] <sup>+</sup>  | 0.803 | ↓* | Sterol Lipids [ST] | 3.2  | Yes | 2 |
| 458.39910 | C30H51NO2   | [M+H] <sup>+</sup>  | 1.538 | ↓* | Sterol Lipids [ST] | 3.3  | Yes | 1 |
| 633.50030 | C41H70O2    | [M+K] <sup>+</sup>  | 1.560 | ↓* | Sterol Lipids [ST] | 3.4  | Yes | 1 |
| 573.26880 | C29H42O10   | [M+Na] <sup>+</sup> | 2.146 | ↓* | Sterol Lipids [ST] | 3.5  | Yes | 1 |
| 663.40910 | C37H58O10   | [M+H] <sup>+</sup>  | 2.602 | ↓* | Sterol Lipids [ST] | 3.5  | Yes | 2 |
| 667.64020 | C46H82O2    | [M+H] <sup>+</sup>  | 1.339 | ↓* | Sterol Lipids [ST] | 3.5  | Yes | 1 |
| 439.29830 | C27H44O2    | [M+K] <sup>+</sup>  | 1.052 | ↓* | Sterol Lipids [ST] | 4.0  | Yes | 3 |
| 489.26050 | C29H38O5    | [M+Na] <sup>+</sup> | 2.442 | ↓* | Sterol Lipids [ST] | 4.1  | Yes | 2 |
| 505.38930 | C31H52O5    | [M+H] <sup>+</sup>  | 0.002 | ↓* | Sterol Lipids [ST] | 4.1  | Yes | 1 |
| 561.34050 | C32H48O8    | [M+H] <sup>+</sup>  | 4.001 | ↓* | Sterol Lipids [ST] | 4.2  | Yes | 1 |
| 501.20920 | C25H34O9    | [M+Na] <sup>+</sup> | 1.706 | ↓* | Sterol Lipids [ST] | 4.4  | Yes | 1 |
| 475.32030 | C32H42O3    | [M+H] <sup>+</sup>  | 1.938 | ↓* | Sterol Lipids [ST] | 4.5  | Yes | 1 |
| 407.32770 | C27H44O     | [M+Na] <sup>+</sup> | 3.155 | ↓* | Sterol Lipids [ST] | 4.5  | Yes | 2 |
| 602.24050 | C26H45NO9S2 | [M+Na] <sup>+</sup> | 4.731 | ↓* | Sterol Lipids [ST] | 4.6  | Yes | 1 |
| 657.34060 | C35H54O9    | [M+K] <sup>+</sup>  | 0.163 | ↓* | Sterol Lipids [ST] | 4.6  | Yes | 2 |
| 551.27230 | C27H45O8P   | [M+Na] <sup>+</sup> | 4.856 | ↓* | Sterol Lipids [ST] | 4.6  | Yes | 3 |
| 599.25200 | C27H44O11S  | [M+Na] <sup>+</sup> | 2.992 | ↓* | Sterol Lipids [ST] | 4.7  | Yes | 3 |
| 489.25060 | C24H40O8S   | [M+H] <sup>+</sup>  | 3.307 | ↓* | Sterol Lipids [ST] | 4.9  | Yes | 1 |
| 691.63910 | C48H82O2    | [M+H] <sup>+</sup>  | 0.298 | ↓* | Sterol Lipids [ST] | 4.9  | Yes | 1 |
| 461.32020 | C30H46O     | [M+K] <sup>+</sup>  | 3.527 | ↓* | Sterol Lipids [ST] | 4.9  | Yes | 3 |

|           |            |         |       |    |                    |      |     |   |
|-----------|------------|---------|-------|----|--------------------|------|-----|---|
| 399.15800 | C21H28O5   | [M+K]+  | 1.546 | ↓* | Sterol Lipids [ST] | 5.2  | Yes | 1 |
| 461.30140 | C29H42O3   | [M+Na]+ | 3.826 | ↓* | Sterol Lipids [ST] | 5.3  | Yes | 1 |
| 457.30980 | C27H43FO3  | [M+Na]+ | 0.890 | ↓* | Sterol Lipids [ST] | 5.3  | Yes | 2 |
| 425.28860 | C24H40O6   | [M+H]+  | 4.035 | ↓* | Sterol Lipids [ST] | 5.4  | Yes | 1 |
| 357.21920 | C21H34O2   | [M+K]+  | 1.086 | ↓* | Sterol Lipids [ST] | 5.6  | Yes | 2 |
| 451.25960 | C27H40O3   | [M+K]+  | 4.106 | ↓* | Sterol Lipids [ST] | 5.6  | Yes | 3 |
| 435.35840 | C29H48O    | [M+Na]+ | 4.330 | ↓* | Sterol Lipids [ST] | 5.7  | Yes | 1 |
| 513.29840 | C29H46O5   | [M+K]+  | 0.325 | ↓* | Sterol Lipids [ST] | 5.8  | Yes | 2 |
| 491.40970 | C31H54O4   | [M+H]+  | 0.684 | ↓* | Sterol Lipids [ST] | 5.8  | Yes | 2 |
| 457.33240 | C29H44O4   | [M+H]+  | 1.343 | ↓* | Sterol Lipids [ST] | 5.8  | Yes | 3 |
| 433.27080 | C27H38O3   | [M+Na]+ | 2.458 | ↓* | Sterol Lipids [ST] | 5.9  | Yes | 2 |
| 599.37780 | C32H54O10  | [M+H]+  | 2.880 | ↓* | Sterol Lipids [ST] | 5.9  | Yes | 2 |
| 653.39030 | C33H58O11  | [M+Na]+ | 4.002 | ↓* | Sterol Lipids [ST] | 5.9  | Yes | 3 |
| 481.30050 | C27H44O5S  | [M+H]+  | 3.588 | ↓* | Sterol Lipids [ST] | 6.0  | Yes | 3 |
| 414.33810 | C27H43NO2  | [M+H]+  | 2.162 | ↓* | Sterol Lipids [ST] | 6.1  | Yes | 2 |
| 599.42890 | C35H60O6   | [M+Na]+ | 0.234 | ↓* | Sterol Lipids [ST] | 6.2  | Yes | 3 |
| 355.29980 | C25H38O    | [M+H]+  | 0.819 | ↓* | Sterol Lipids [ST] | 6.2  | Yes | 1 |
| 559.31760 | C34H48O4   | [M+K]+  | 2.446 | ↓* | Sterol Lipids [ST] | 6.2  | Yes | 3 |
| 513.33820 | C30H50O3S  | [M+Na]+ | 0.707 | ↓* | Sterol Lipids [ST] | 6.3  | Yes | 1 |
| 441.28150 | C26H42O2S  | [M+Na]+ | 2.670 | ↓* | Sterol Lipids [ST] | 6.3  | Yes | 3 |
| 539.29820 | C30H44O7   | [M+Na]+ | 0.510 | ↓* | Sterol Lipids [ST] | 6.3  | Yes | 3 |
| 423.32190 | C27H44O2   | [M+Na]+ | 4.725 | ↓* | Sterol Lipids [ST] | 6.8  | Yes | 2 |
| 493.38870 | C30H52O5   | [M+H]+  | 1.218 | ↓* | Sterol Lipids [ST] | 6.8  | Yes | 1 |
| 664.32930 | C32H51NO12 | [M+Na]+ | 2.407 | ↓* | Sterol Lipids [ST] | 6.9  | Yes | 3 |
| 425.29980 | C27H43F    | [M+K]+  | 2.854 | ↓* | Sterol Lipids [ST] | 6.9  | Yes | 3 |
| 433.33000 | C27H44O4   | [M+H]+  | 4.122 | ↓* | Sterol Lipids [ST] | 6.9  | Yes | 3 |
| 535.34090 | C32H48O5   | [M+Na]+ | 1.784 | ↓* | Sterol Lipids [ST] | 7.1  | Yes | 2 |
| 443.34900 | C27H48O3   | [M+Na]+ | 2.515 | ↓* | Sterol Lipids [ST] | 7.1  | Yes | 1 |
| 477.26010 | C28H38O5   | [M+Na]+ | 3.342 | ↓* | Sterol Lipids [ST] | 7.2  | Yes | 1 |
| 625.35760 | C33H52O11  | [M+H]+  | 1.905 | ↓* | Sterol Lipids [ST] | 7.2  | Yes | 2 |
| 411.29030 | C27H38O3   | [M+H]+  | 0.921 | ↓* | Sterol Lipids [ST] | 7.2  | Yes | 2 |
| 647.57770 | C45H74O2   | [M+H]+  | 1.535 | ↓* | Sterol Lipids [ST] | 7.4  | Yes | 1 |
| 472.30210 | C26H43NO5  | [M+Na]+ | 3.796 | ↓* | Sterol Lipids [ST] | 7.5  | Yes | 3 |
| 527.33030 | C30H52O3Si | [M+K]+  | 3.762 | ↓* | Sterol Lipids [ST] | 7.5  | Yes | 3 |
| 575.26010 | C29H44O9   | [M+K]+  | 3.725 | ↓* | Sterol Lipids [ST] | 7.7  | Yes | 3 |
| 385.27140 | C23H38O3   | [M+Na]+ | 1.207 | ↓* | Sterol Lipids [ST] | 7.9  | Yes | 1 |
| 419.35240 | C27H46O3   | [M+H]+  | 0.289 | ↓* | Sterol Lipids [ST] | 8.0  | Yes | 3 |
| 489.39220 | C31H52O4   | [M+H]+  | 4.467 | ↓* | Sterol Lipids [ST] | 8.0  | Yes | 3 |
| 415.28110 | C24H40O4   | [M+Na]+ | 3.203 | ↓* | Sterol Lipids [ST] | 8.3  | Yes | 3 |
| 387.36240 | C27H46O    | [M+H]+  | 0.751 | ↓* | Sterol Lipids [ST] | 8.3  | Yes | 2 |
| 443.29180 | C29H40O2   | [M+Na]+ | 1.805 | ↓* | Sterol Lipids [ST] | 8.8  | Yes | 1 |
| 615.41000 | C33H58O10  | [M+H]+  | 1.342 | ↓* | Sterol Lipids [ST] | 9.0  | Yes | 3 |
| 529.29180 | C27H45O8P  | [M+H]+  | 2.330 | ↓* | Sterol Lipids [ST] | 9.1  | Yes | 1 |
| 550.14850 | C24H31O11S | [M+Na]+ | 0.033 | ↓* | Sterol Lipids [ST] | 9.2  | Yes | 1 |
| 552.25940 | C26H43NO8S | [M+Na]+ | 2.374 | ↓* | Sterol Lipids [ST] | 9.2  | Yes | 2 |
| 507.25760 | C27H38O9   | [M+H]+  | 3.570 | ↓* | Sterol Lipids [ST] | 9.6  | Yes | 3 |
| 531.22020 | C27H40O6S  | [M+K]+  | 3.633 | ↓* | Sterol Lipids [ST] | 9.7  | Yes | 2 |
| 465.21140 | C24H32O9   | [M+H]+  | 2.281 | ↓* | Sterol Lipids [ST] | 9.8  | Yes | 3 |
| 553.30100 | C29H44O10  | [M+H]+  | 0.499 | ↓* | Sterol Lipids [ST] | 10.9 | Yes | 3 |
| 441.29768 | C26H39F3O2 | [M+H]+  | 0.821 | ↓* | Sterol Lipids [ST] | 47.6 | Yes | 3 |

Supplemental Table 8:

MG1655 50ng/mL, 60 min. exposure, up/downregulated lipids

| Measured m/z | Chemical Formula | Adduct                | Error (ppm) | Up/Downregulated | Lipid Category            | Absolute(Fold Change) | IS Confirmation | No. of Batches (of 3) |
|--------------|------------------|-----------------------|-------------|------------------|---------------------------|-----------------------|-----------------|-----------------------|
| 343.24870    | C19H34O5         | [M+H] <sup>+</sup>    | 0.725       | ↓*               | Fatty Acyls [FA]          | 3.7                   | No              | 2                     |
| 352.25130    | C17H37NO4S       | [M+H] <sup>+</sup>    | 2.433       | ↓*               | Sphingolipids [SP]        | 3.2                   | No              | 2                     |
| 357.11820    | C16H20O9         | [M+H] <sup>+</sup>    | 1.008       | ↓*               | Prenol Lipids [PR]        | 3.2                   | No              | 3                     |
| 367.24930    | C21H34O5         | [M+H] <sup>+</sup>    | 2.312       | ↓*               | Fatty Acyls [FA]          | 4.6                   | No              | 1                     |
| 403.36860    | C26H46N2O        | [M+H] <sup>+</sup>    | 0.590       | ↓*               | Fatty Acyls [FA]          | 3.5                   | No              | 1                     |
| 407.32770    | C24H48O2         | [M+K] <sup>+</sup>    | 3.530       | ↓*               | Fatty Acyls [FA]          | 3.1                   | No              | 3                     |
| 411.29030    | C27H38O3         | [M+H] <sup>+</sup>    | 0.921       | ↓*               | Sterol Lipids [ST]        | 3.1                   | Yes             | 2                     |
| 411.39867    | C30H50           | [M+H] <sup>+</sup>    | 0.986       | ↑*               | Glycerophospholipids [GP] | 7.0                   | Yes             | 2                     |
| 413.19980    | C21H32O6S        | [M+H] <sup>+</sup>    | 0.029       | ↓*               | Sterol Lipids [ST]        | 3.0                   | Yes             | 3                     |
| 431.17204    | C23H26O8         | [M+H] <sup>+</sup>    | 3.354       | ↑*               | Glycerophospholipids [GP] | 10.1                  | Yes             | 3                     |
| 439.29830    | C27H44O2         | [M+K] <sup>+</sup>    | 1.052       | ↓*               | Sterol Lipids [ST]        | 3.1                   | Yes             | 3                     |
| 441.29150    | C30H42           | [M+K] <sup>+</sup>    | 1.944       | ↓                | Prenol Lipids [PR]        | 4.9                   | No              | 1                     |
| 441.29810    | C26H39F3O2       | [M+H] <sup>+</sup>    | 0.134       | ↓*               | Sterol Lipids [ST]        | 41.0                  | Yes             | 2                     |
| 442.22070    | C18H36NO9P       | [M+H] <sup>+</sup>    | 0.233       | ↓*               | Glycerophospholipids [GP] | 3.7                   | Yes             | 2                     |
| 455.24130    | C20H39O9P        | [M+H] <sup>+</sup>    | 0.663       | ↓*               | Glycerophospholipids [GP] | 3.1                   | Yes             | 3                     |
| 463.17230    | C22H32O8         | [M+K] <sup>+</sup>    | 2.435       | ↓*               | Prenol Lipids [PR]        | 3.6                   | No              | 3                     |
| 467.03937    | C21H18O10        | [M-2H+K] <sup>-</sup> | 2.815       | ↑                | Fatty Acyls [FA]          | 5.4                   | No              | 2                     |
| 470.24980    | C20H40NO9P       | [M+H] <sup>+</sup>    | 4.459       | ↓*               | Glycerophospholipids [GP] | 3.1                   | Yes             | 1                     |
| 477.04034    | C18H34Br2O2      | [M-2H+K] <sup>-</sup> | 0.552       | ↑                | Fatty Acyls [FA]          | 6.6                   | No              | 3                     |
| 479.15950    | C23H33ClO6       | [M+K] <sup>+</sup>    | 1.619       | ↓*               | Fatty Acyls [FA]          | 3.7                   | No              | 2                     |
| 481.49940    | C32H64O2         | [M+H] <sup>+</sup>    | 1.961       | ↓*               | Fatty Acyls [FA]          | 3.4                   | No              | 1                     |
| 485.28880    | C22H45O9P        | [M+H] <sup>+</sup>    | 1.756       | ↓*               | Glycerophospholipids [GP] | 3.5                   | Yes             | 2                     |
| 495.07760    | C21H20O14        | [M-H] <sup>-</sup>    | 0.238       | ↑                | Fatty Acyls [FA]          | 3.8                   | No              | 2                     |
| 501.03900    | C20H32Br2O2      | [M+K] <sup>+</sup>    | 3.207       | ↓*               | Prenol Lipids [PR]        | 22.4                  | No              | 3                     |
| 501.05860    | C15H29O10P3      | [M+K] <sup>+</sup>    | 4.930       | ↓*               | Prenol Lipids [PR]        | 4.9                   | No              | 1                     |
| 503.21870    | C29H36O5         | [M+K] <sup>+</sup>    | 2.550       | ↓*               | Prenol Lipids [PR]        | 3.1                   | No              | 3                     |
| 505.38930    | C31H52O5         | [M+H] <sup>+</sup>    | 0.002       | ↓*               | Sterol Lipids [ST]        | 3.2                   | Yes             | 2                     |
| 510.31880    | C24H48NO8P       | [M+H] <sup>+</sup>    | 1.532       | ↓*               | Glycerophospholipids [GP] | 3.2                   | Yes             | 3                     |
| 519.27050    | C27H44O7         | [M+K] <sup>+</sup>    | 3.684       | ↓*               | Sterol Lipids [ST]        | 3.4                   | Yes             | 1                     |
| 520.34020    | C26H50NO7P       | [M+H] <sup>+</sup>    | 0.225       | ↓*               | Glycerophospholipids [GP] | 3.3                   | Yes             | 3                     |
| 521.39790    | C30H58O4         | [M+K] <sup>+</sup>    | 1.308       | ↓*               | Fatty Acyls [FA]          | 3.0                   | No              | 1                     |
| 527.33030    | C30H52O3Si       | [M+K] <sup>+</sup>    | 3.762       | ↓*               | Sterol Lipids [ST]        | 3.2                   | Yes             | 3                     |
| 529.29180    | C27H45O8P        | [M+H] <sup>+</sup>    | 2.330       | ↓*               | Sterol Lipids [ST]        | 3.0                   | Yes             | 1                     |
| 531.22020    | C27H40O6S        | [M+K] <sup>+</sup>    | 3.633       | ↓*               | Sterol Lipids [ST]        | 4.0                   | Yes             | 2                     |
| 535.24140    | C23H45O9P        | [M+K] <sup>+</sup>    | 4.540       | ↓*               | Glycerophospholipids [GP] | 3.0                   | Yes             | 3                     |
| 537.17210    | C24H34O11        | [M+K] <sup>+</sup>    | 3.208       | ↓*               | Prenol Lipids [PR]        | 3.2                   | No              | 1                     |
| 539.17930    | C25H37ClO8       | [M+K] <sup>+</sup>    | 3.906       | ↓*               | Fatty Acyls [FA]          | 3.4                   | No              | 3                     |
| 547.47242    | C35H62O4         | [M+H] <sup>+</sup>    | 0.390       | ↑                | Glycerophospholipids [GP] | 4.5                   | Yes             | 2                     |
| 550.21990    | C22H42NO10P      | [M+K] <sup>+</sup>    | 2.828       | ↓*               | Glycerophospholipids [GP] | 3.2                   | Yes             | 2                     |
| 550.46230    | C32H65NO3        | [M+K] <sup>+</sup>    | 3.902       | ↑                | Fatty Acyls [FA]          | 3.0                   | No              | 1                     |
| 552.43820    | C29H62NO6P       | [M+H] <sup>+</sup>    | 1.995       | ↓*               | Glycerophospholipids [GP] | 3.3                   | Yes             | 1                     |
| 557.53080    | C38H68O2         | [M+H] <sup>+</sup>    | 1.873       | ↓*               | Fatty Acyls [FA]          | 3.3                   | No              | 3                     |
| 559.31760    | C34H48O4         | [M+K] <sup>+</sup>    | 2.446       | ↓*               | Sterol Lipids [ST]        | 4.0                   | Yes             | 1                     |
| 561.48860    | C36H64O4         | [M+H] <sup>+</sup>    | 0.559       | ↓*               | Fatty Acyls [FA]          | 4.2                   | No              | 2                     |
| 562.36210    | C27H58NO6P       | [M+K] <sup>+</sup>    | 3.172       | ↓*               | Glycerophospholipids [GP] | 3.0                   | Yes             | 2                     |
| 562.45820    | C33H65NO3        | [M+K] <sup>+</sup>    | 3.470       | ↓*               | Sphingolipids [SP]        | 3.0                   | No              | 2                     |
| 564.27060    | C24H48NO9P       | [M+K] <sup>+</sup>    | 0.392       | ↑                | Glycerolipids [GL]        | 3.5                   | No              | 2                     |
| 569.38160    | C28H57O9P        | [M+H] <sup>+</sup>    | 0.437       | ↓*               | Glycerophospholipids [GP] | 3.6                   | Yes             | 3                     |
| 571.03750    | C22H20O16S       | [M-H] <sup>-</sup>    | 3.300       | ↑                | Fatty Acyls [FA]          | 3.6                   | No              | 2                     |
| 575.31190    | C27H53O8P        | [M+K] <sup>+</sup>    | 0.669       | ↓*               | Glycerophospholipids [GP] | 3.1                   | Yes             | 2                     |
| 577.46790    | C32H64O8         | [M+H] <sup>+</sup>    | 0.080       | ↓*               | Fatty Acyls [FA]          | 3.0                   | No              | 3                     |
| 579.43910    | C31H63O7P        | [M+H] <sup>+</sup>    | 0.226       | ↓*               | Glycerophospholipids [GP] | 3.8                   | Yes             | 3                     |
| 584.23900    | C26H44NO9P       | [M+K] <sup>+</sup>    | 0.135       | ↓*               | Glycerophospholipids [GP] | 3.5                   | Yes             | 1                     |
| 586.07240    | C25H25O14        | [M-2H+K] <sup>-</sup> | 0.163       | ↑                | Fatty Acyls [FA]          | 3.4                   | No              | 2                     |
| 589.53060    | C37H74O2         | [M+K] <sup>+</sup>    | 3.372       | ↓*               | Fatty Acyls [FA]          | 5.5                   | No              | 3                     |
| 591.52860    | C40H72           | [M+K] <sup>+</sup>    | 2.522       | ↑                | Fatty Acyls [FA]          | 3.0                   | No              | 3                     |
| 591.60860    | C40H78O2         | [M+H] <sup>+</sup>    | 1.004       | ↓*               | Fatty Acyls [FA]          | 3.3                   | No              | 2                     |
| 595.28760    | C27H47O12P       | [M+H] <sup>+</sup>    | 1.248       | ↓*               | Glycerophospholipids [GP] | 3.0                   | Yes             | 3                     |
| 599.37780    | C32H54O10        | [M+H] <sup>+</sup>    | 2.880       | ↓*               | Sterol Lipids [ST]        | 3.3                   | Yes             | 3                     |
| 604.50790    | C36H71NO3        | [M+K] <sup>+</sup>    | 1.320       | ↓*               | Sphingolipids [SP]        | 10.2                  | No              | 2                     |
| 607.47230    | C33H67O7P        | [M+H] <sup>+</sup>    | 3.343       | ↓*               | Glycerophospholipids [GP] | 3.8                   | Yes             | 1                     |
| 608.24140    | C28H44NO9P       | [M+K] <sup>+</sup>    | 3.816       | ↓*               | Glycerophospholipids [GP] | 3.2                   | Yes             | 2                     |
| 608.50030    | C35H71NO4        | [M+K] <sup>+</sup>    | 2.822       | ↓*               | Sphingolipids [SP]        | 4.2                   | No              | 3                     |
| 615.41000    | C33H58O10        | [M+H] <sup>+</sup>    | 1.342       | ↓*               | Sterol Lipids [ST]        | 3.1                   | Yes             | 1                     |
| 619.47060    | C34H67O7P        | [M+H] <sup>+</sup>    | 0.534       | ↓*               | Glycerophospholipids [GP] | 4.1                   | Yes             | 2                     |
| 620.42920    | C32H62NO8P       | [M+H] <sup>+</sup>    | 0.110       | ↓*               | Glycerophospholipids [GP] | 3.3                   | Yes             | 3                     |
| 623.32180    | C29H51O12P       | [M+H] <sup>+</sup>    | 3.461       | ↓*               | Glycerophospholipids [GP] | 3.5                   | Yes             | 1                     |
| 625.28020    | C30H52O7P2       | [M+K] <sup>+</sup>    | 3.739       | ↓*               | Prenol Lipids [PR]        | 3.7                   | No              | 3                     |
| 627.49800    | C40H66O5         | [M+H] <sup>+</sup>    | 1.356       | ↓*               | Fatty Acyls [FA]          | 3.1                   | No              | 3                     |
| 637.17960    | C29H39ClO11      | [M+K] <sup>+</sup>    | 3.454       | ↓*               | Fatty Acyls [FA]          | 3.7                   | No              | 3                     |
| 639.37850    | C40H56O4         | [M+K] <sup>+</sup>    | 4.798       | ↓*               | Prenol Lipids [PR]        | 3.2                   | No              | 3                     |
| 645.30200    | C31H49O12P       | [M+H] <sup>+</sup>    | 3.088       | ↓*               | Glycerophospholipids [GP] | 3.4                   | Yes             | 2                     |
| 647.56080    | C41H74O5         | [M+H] <sup>+</sup>    | 1.005       | ↓*               | Glycerolipids [GL]        | 3.0                   | No              | 2                     |
| 650.43950    | C33H64NO9P       | [M+H] <sup>+</sup>    | 0.303       | ↓*               | Glycerophospholipids [GP] | 3.6                   | Yes             | 2                     |

|           |             |                    |       |    |                           |      |     |   |
|-----------|-------------|--------------------|-------|----|---------------------------|------|-----|---|
| 653.41870 | C36H61O8P   | [M+H] <sup>+</sup> | 0.713 | ↓* | Glycerophospholipids [GP] | 3.5  | Yes | 3 |
| 653.43800 | C33H65O10P  | [M+H] <sup>+</sup> | 2.087 | ↓* | Glycerophospholipids [GP] | 3.4  | Yes | 1 |
| 663.40910 | C37H58O10   | [M+H] <sup>+</sup> | 2.602 | ↓* | Sterol Lipids [ST]        | 3.0  | Yes | 1 |
| 665.41800 | C37H61O8P   | [M+H] <sup>+</sup> | 0.352 | ↓* | Glycerophospholipids [GP] | 5.9  | Yes | 2 |
| 667.47070 | C40H68O5    | [M+K] <sup>+</sup> | 0.475 | ↓* | Glycerolipids [GL]        | 4.9  | No  | 1 |
| 667.53090 | C43H70O5    | [M+H] <sup>+</sup> | 1.122 | ↓* | Glycerolipids [GL]        | 3.7  | No  | 3 |
| 667.64020 | C46H82O2    | [M+H] <sup>+</sup> | 1.339 | ↓* | Sterol Lipids [ST]        | 3.4  | Yes | 1 |
| 669.44770 | C37H65O8P   | [M+H] <sup>+</sup> | 2.740 | ↓* | Glycerophospholipids [GP] | 4.3  | Yes | 3 |
| 671.46220 | C37H67O8P   | [M+H] <sup>+</sup> | 4.444 | ↓* | Glycerophospholipids [GP] | 3.9  | Yes | 2 |
| 673.47970 | C37H69O8P   | [M+H] <sup>+</sup> | 1.684 | ↓* | Glycerophospholipids [GP] | 3.6  | Yes | 3 |
| 678.57910 | C38H80NO6P  | [M+H] <sup>+</sup> | 1.552 | ↓* | Glycerophospholipids [GP] | 4.1  | Yes | 1 |
| 684.64860 | C42H85NO5   | [M+H] <sup>+</sup> | 2.921 | ↓* | Sphingolipids [SP]        | 4.6  | No  | 2 |
| 686.45180 | C35H70NO7P  | [M+K] <sup>+</sup> | 1.310 | ↓* | Glycerophospholipids [GP] | 4.0  | Yes | 2 |
| 691.42980 | C34H69O9P   | [M+K] <sup>+</sup> | 2.648 | ↓* | Glycerophospholipids [GP] | 6.8  | Yes | 1 |
| 693.44950 | C39H65O8P   | [M+H] <sup>+</sup> | 0.049 | ↓* | Glycerophospholipids [GP] | 4.6  | Yes | 1 |
| 695.44200 | C37H69O7P   | [M+K] <sup>+</sup> | 0.286 | ↓* | Glycerophospholipids [GP] | 3.0  | Yes | 2 |
| 695.50020 | C42H72O5    | [M+K] <sup>+</sup> | 2.132 | ↓* | Glycerolipids [GL]        | 3.4  | No  | 2 |
| 701.59090 | C41H80O8    | [M+H] <sup>+</sup> | 3.201 | ↓* | Glycerolipids [GL]        | 3.2  | No  | 2 |
| 703.39200 | C34H65O10P  | [M+K] <sup>+</sup> | 4.615 | ↓* | Glycerophospholipids [GP] | 3.0  | Yes | 2 |
| 705.48840 | C41H69O7P   | [M+H] <sup>+</sup> | 3.517 | ↓* | Glycerophospholipids [GP] | 3.8  | Yes | 2 |
| 709.46000 | C38H71O7P   | [M+K] <sup>+</sup> | 3.593 | ↓* | Glycerophospholipids [GP] | 5.3  | Yes | 2 |
| 709.47890 | C40H69O8P   | [M+H] <sup>+</sup> | 2.726 | ↓* | Glycerophospholipids [GP] | 4.7  | Yes | 2 |
| 711.49890 | C40H71O8P   | [M+H] <sup>+</sup> | 3.396 | ↓* | Glycerophospholipids [GP] | 6.8  | Yes | 2 |
| 718.43900 | C35H70NO9P  | [M+K] <sup>+</sup> | 4.912 | ↓* | Glycerophospholipids [GP] | 3.2  | Yes | 3 |
| 719.46090 | C36H73O9P   | [M+K] <sup>+</sup> | 2.823 | ↓* | Glycerophospholipids [GP] | 4.5  | Yes | 3 |
| 721.35760 | C36H58O12   | [M+K] <sup>+</sup> | 1.472 | ↓* | Prenol Lipids [PR]        | 3.2  | No  | 3 |
| 727.44230 | C35H67O13P  | [M+H] <sup>+</sup> | 3.493 | ↓* | Glycerophospholipids [GP] | 3.7  | Yes | 2 |
| 727.51860 | C38H77N2O6P | [M+K] <sup>+</sup> | 4.078 | ↓* | Sphingolipids [SP]        | 3.9  | No  | 1 |
| 728.51960 | C40H74NO8P  | [M+H] <sup>+</sup> | 4.707 | ↓* | Glycerophospholipids [GP] | 5.2  | Yes | 1 |
| 729.52020 | C39H79O7P   | [M+K] <sup>+</sup> | 0.204 | ↓* | Glycerophospholipids [GP] | 3.4  | Yes | 3 |
| 737.49130 | C40H75O7P   | [M+K] <sup>+</sup> | 3.456 | ↓* | Glycerophospholipids [GP] | 4.4  | Yes | 3 |
| 737.69950 | C47H92O5    | [M+H] <sup>+</sup> | 3.798 | ↓* | Glycerolipids [GL]        | 3.1  | No  | 3 |
| 741.53178 | C39H79N2O6P | [M+K] <sup>+</sup> | 0.676 | ↓* | Sphingolipids [SP]        | 3.5  | No  | 3 |
| 747.48020 | C46H66O8    | [M+H] <sup>+</sup> | 4.543 | ↓* | Prenol Lipids [PR]        | 3.1  | No  | 2 |
| 747.49120 | C38H77O9P   | [M+K] <sup>+</sup> | 4.055 | ↓* | Glycerophospholipids [GP] | 3.0  | Yes | 1 |
| 747.51880 | C40H77O10P  | [M-H] <sup>-</sup> | 1.587 | ↓* | Glycerophospholipids [GP] | 3.7  | Yes | 2 |
| 748.51070 | C39H74NO10P | [M+H] <sup>+</sup> | 2.890 | ↓* | Glycerophospholipids [GP] | 5.5  | Yes | 3 |
| 749.49130 | C41H75O7P   | [M+K] <sup>+</sup> | 3.401 | ↓* | Glycerophospholipids [GP] | 7.7  | Yes | 3 |
| 749.51100 | C43H73O8P   | [M+H] <sup>+</sup> | 1.513 | ↓* | Glycerophospholipids [GP] | 5.2  | Yes | 3 |
| 749.54810 | C46H78O5    | [M+K] <sup>+</sup> | 0.711 | ↓* | Glycerolipids [GL]        | 5.7  | No  | 3 |
| 753.39020 | C41H63O8P   | [M+K] <sup>+</sup> | 0.576 | ↓* | Glycerophospholipids [GP] | 3.0  | Yes | 1 |
| 753.46797 | C41H69O10P  | [M+H] <sup>+</sup> | 3.573 | ↓* | Glycerophospholipids [GP] | 4.2  | Yes | 3 |
| 753.54150 | C43H77O8P   | [M+H] <sup>+</sup> | 2.567 | ↓* | Glycerophospholipids [GP] | 3.3  | Yes | 1 |
| 754.48064 | C39H74NO8P  | [M+K] <sup>+</sup> | 2.290 | ↑  | Prenol Lipids [PR]        | 3.1  | No  | 3 |
| 754.53810 | C42H76NO8P  | [M+H] <sup>+</sup> | 0.773 | ↓* | Glycerophospholipids [GP] | 5.1  | Yes | 3 |
| 754.60870 | C44H84NO6P  | [M+H] <sup>+</sup> | 3.648 | ↑  | Sphingolipids [SP]        | 3.0  | No  | 3 |
| 761.56810 | C42H81O9P   | [M+H] <sup>+</sup> | 2.034 | ↓* | Glycerophospholipids [GP] | 3.4  | Yes | 1 |
| 762.48160 | C41H74NO7P  | [M+K] <sup>+</sup> | 3.148 | ↓* | Glycerophospholipids [GP] | 4.7  | Yes | 1 |
| 762.50976 | C43H72NO8P  | [M+H] <sup>+</sup> | 3.116 | ↓* | Glycerophospholipids [GP] | 5.7  | Yes | 2 |
| 764.50950 | C41H75NO9   | [M+K] <sup>+</sup> | 2.103 | ↓* | Sphingolipids [SP]        | 5.8  | No  | 1 |
| 764.55950 | C44H78NO7P  | [M+H] <sup>+</sup> | 0.107 | ↓* | Glycerophospholipids [GP] | 3.1  | Yes | 2 |
| 766.48050 | C40H74NO8P  | [M+K] <sup>+</sup> | 2.068 | ↓* | Glycerophospholipids [GP] | 7.0  | Yes | 3 |
| 766.49870 | C42H72NO9P  | [M+H] <sup>+</sup> | 4.694 | ↓* | Glycerophospholipids [GP] | 4.1  | Yes | 1 |
| 767.47210 | C45H66O10   | [M+H] <sup>+</sup> | 1.728 | ↓* | Glycerolipids [GL]        | 3.1  | No  | 3 |
| 768.47200 | C43H72NO6P  | [M+K] <sup>+</sup> | 1.866 | ↓* | Glycerophospholipids [GP] | 3.3  | Yes | 3 |
| 775.47120 | C42H73O8P   | [M+K] <sup>+</sup> | 4.106 | ↓* | Glycerophospholipids [GP] | 3.2  | Yes | 1 |
| 777.52000 | C43H79O7P   | [M+K] <sup>+</sup> | 0.066 | ↓* | Glycerophospholipids [GP] | 4.5  | Yes | 1 |
| 777.54980 | C45H76O10   | [M+H] <sup>+</sup> | 2.413 | ↓* | Glycerolipids [GL]        | 3.2  | No  | 2 |
| 778.47817 | C41H74NO8P  | [M+K] <sup>+</sup> | 0.955 | ↓* | Glycerophospholipids [GP] | 3.2  | Yes | 2 |
| 780.46010 | C40H72NO9P  | [M+K] <sup>+</sup> | 2.460 | ↓* | Glycerophospholipids [GP] | 3.4  | Yes | 2 |
| 780.51990 | C43H74NO9P  | [M+H] <sup>+</sup> | 2.501 | ↓* | Glycerophospholipids [GP] | 3.9  | Yes | 3 |
| 781.50000 | C43H73O10P  | [M+H] <sup>+</sup> | 2.513 | ↓* | Glycerophospholipids [GP] | 3.9  | Yes | 1 |
| 782.57170 | C44H80NO8P  | [M+H] <sup>+</sup> | 2.194 | ↓* | Glycerophospholipids [GP] | 3.9  | Yes | 3 |
| 784.54850 | C43H78NO9P  | [M+H] <sup>+</sup> | 0.953 | ↓* | Glycerophospholipids [GP] | 4.0  | Yes | 1 |
| 788.51910 | C45H74NO8P  | [M+H] <sup>+</sup> | 4.988 | ↓* | Glycerophospholipids [GP] | 10.8 | Yes | 2 |
| 792.47820 | C43H70NO10P | [M+H] <sup>+</sup> | 4.242 | ↓* | Glycerophospholipids [GP] | 3.0  | Yes | 3 |
| 793.42910 | C37H71O13P  | [M+K] <sup>+</sup> | 2.721 | ↓* | Glycerophospholipids [GP] | 3.0  | Yes | 2 |
| 793.49860 | C44H73O10P  | [M+H] <sup>+</sup> | 4.239 | ↓* | Glycerophospholipids [GP] | 5.8  | Yes | 3 |
| 795.51860 | C44H75O10P  | [M+H] <sup>+</sup> | 1.239 | ↓* | Glycerophospholipids [GP] | 4.4  | Yes | 2 |
| 797.58120 | C44H87O7P   | [M+K] <sup>+</sup> | 1.819 | ↓* | Glycerophospholipids [GP] | 3.0  | Yes | 1 |
| 799.48870 | C41H77O10P  | [M+K] <sup>+</sup> | 0.558 | ↓* | Glycerophospholipids [GP] | 5.3  | Yes | 3 |
| 800.54030 | C43H78NO10P | [M+H] <sup>+</sup> | 4.825 | ↓* | Glycerophospholipids [GP] | 3.0  | Yes | 1 |
| 801.47990 | C44H75O8P   | [M+K] <sup>+</sup> | 4.699 | ↓* | Glycerophospholipids [GP] | 6.6  | Yes | 3 |
| 802.61040 | C48H84NO6P  | [M+H] <sup>+</sup> | 1.312 | ↓* | Glycerophospholipids [GP] | 3.0  | Yes | 3 |
| 804.55770 | C46H78NO8P  | [M+H] <sup>+</sup> | 4.185 | ↓* | Glycerophospholipids [GP] | 3.3  | Yes | 1 |
| 805.30240 | C38H54O16   | [M+K] <sup>+</sup> | 3.102 | ↓* | Sterol Lipids [ST]        | 3.6  | Yes | 3 |
| 805.48970 | C41H73O13P  | [M+H] <sup>+</sup> | 3.713 | ↓* | Glycerophospholipids [GP] | 3.9  | Yes | 3 |

|           |             |                    |       |    |                           |     |     |   |
|-----------|-------------|--------------------|-------|----|---------------------------|-----|-----|---|
| 805.49880 | C45H73O10P  | [M+H] <sup>+</sup> | 3.928 | ↓* | Glycerophospholipids [GP] | 3.5 | Yes | 1 |
| 805.52190 | C42H77O12P  | [M+H] <sup>+</sup> | 1.482 | ↓* | Glycerophospholipids [GP] | 3.0 | Yes | 2 |
| 805.72900 | C51H96O6    | [M+H] <sup>+</sup> | 0.599 | ↓* | Glycerolipids [GL]        | 3.5 | No  | 3 |
| 807.51880 | C45H75O10P  | [M+H] <sup>+</sup> | 1.469 | ↓* | Glycerophospholipids [GP] | 3.6 | Yes | 2 |
| 807.58820 | C47H83O8P   | [M+H] <sup>+</sup> | 2.704 | ↓* | Glycerophospholipids [GP] | 3.6 | Yes | 1 |
| 810.58030 | C44H86NO7P  | [M+K] <sup>+</sup> | 2.961 | ↓* | Glycerophospholipids [GP] | 3.4 | Yes | 1 |
| 811.55030 | C45H79O10P  | [M+H] <sup>+</sup> | 1.708 | ↓* | Glycerophospholipids [GP] | 3.6 | Yes | 1 |
| 811.56820 | C42H83O12P  | [M+H] <sup>+</sup> | 2.272 | ↓* | Glycerophospholipids [GP] | 4.2 | Yes | 3 |
| 813.54100 | C43H83O9P   | [M+K] <sup>+</sup> | 0.222 | ↑  | Glycerophospholipids [GP] | 3.3 | Yes | 1 |
| 814.62970 | C46H88NO8P  | [M+H] <sup>+</sup> | 3.539 | ↑  | Glycerophospholipids [GP] | 3.0 | Yes | 2 |
| 815.71030 | C52H94O6    | [M+H] <sup>+</sup> | 3.147 | ↓* | Glycerolipids [GL]        | 5.5 | No  | 2 |
| 819.61220 | C45H87O10P  | [M+H] <sup>+</sup> | 0.837 | ↓* | Glycerophospholipids [GP] | 4.3 | Yes | 1 |
| 821.49070 | C40H79O12P  | [M+K] <sup>+</sup> | 4.779 | ↓* | Glycerophospholipids [GP] | 3.5 | Yes | 2 |
| 822.57760 | C45H86NO7P  | [M+K] <sup>+</sup> | 0.365 | ↓* | Glycerophospholipids [GP] | 3.6 | Yes | 2 |
| 822.60200 | C47H84NO8P  | [M+H] <sup>+</sup> | 0.872 | ↓* | Glycerophospholipids [GP] | 4.3 | Yes | 3 |
| 823.54840 | C46H79O10P  | [M+H] <sup>+</sup> | 0.624 | ↓* | Glycerophospholipids [GP] | 3.6 | Yes | 3 |
| 828.65010 | C47H90NO8P  | [M+H] <sup>+</sup> | 2.253 | ↓* | Glycerophospholipids [GP] | 3.0 | Yes | 3 |
| 832.58870 | C48H82NO8P  | [M+H] <sup>+</sup> | 3.684 | ↓* | Glycerophospholipids [GP] | 3.3 | Yes | 3 |
| 833.49820 | C41H79O12P  | [M+K] <sup>+</sup> | 4.288 | ↓* | Glycerophospholipids [GP] | 3.4 | Yes | 2 |
| 834.47760 | C40H77NO12S | [M+K] <sup>+</sup> | 3.307 | ↓* | Sphingolipids [SP]        | 3.4 | No  | 3 |
| 836.52190 | C49H74NO8P  | [M+H] <sup>+</sup> | 1.354 | ↓* | Glycerophospholipids [GP] | 3.3 | Yes | 3 |
| 837.60210 | C48H85O9P   | [M+H] <sup>+</sup> | 1.374 | ↓* | Glycerophospholipids [GP] | 8.8 | Yes | 3 |
| 839.41120 | C41H69O13P  | [M+K] <sup>+</sup> | 0.108 | ↓* | Glycerophospholipids [GP] | 3.8 | Yes | 3 |
| 839.57810 | C47H83O10P  | [M+H] <sup>+</sup> | 2.518 | ↓* | Glycerophospholipids [GP] | 3.0 | Yes | 2 |
| 840.62100 | C46H92NO7P  | [M+K] <sup>+</sup> | 4.580 | ↓* | Glycerophospholipids [GP] | 3.7 | Yes | 2 |
| 841.48840 | C44H73O13P  | [M+H] <sup>+</sup> | 2.010 | ↓* | Glycerophospholipids [GP] | 3.4 | Yes | 2 |
| 841.49840 | C48H73O10P  | [M+H] <sup>+</sup> | 4.235 | ↓* | Glycerophospholipids [GP] | 3.6 | Yes | 3 |
| 841.57170 | C45H87O9P   | [M+K] <sup>+</sup> | 0.928 | ↓* | Glycerophospholipids [GP] | 3.8 | Yes | 2 |
| 845.54800 | C47H83O8P   | [M+K] <sup>+</sup> | 2.051 | ↓* | Glycerophospholipids [GP] | 4.6 | Yes | 1 |

Supplemental Table 9:

DPB635 25 ng/mL 30 min. exposure, up/downregulated lipids

| Measured m/z | Chemical Formula | Adduct     | Error (ppm) | Up/downregulated | Lipid Category            | Absolute(fold change) | IS Confirmation | No. of Batches (of 3) |
|--------------|------------------|------------|-------------|------------------|---------------------------|-----------------------|-----------------|-----------------------|
| 407.21940    | C19H37O7P        | [M-H]-     | 1.149       | ↑                | Fatty Acyls [FA]          | 3.0                   | No              | 2                     |
| 471.34773    | C30H48O4         | [M-H]-     | 0.622       | ↑                | Fatty Acyls [FA]          | 3.0                   | No              | 3                     |
| 451.32174    | C30H44O3         | [M-H]-     | 1.155       | ↑                | Fatty Acyls [FA]          | 3.0                   | No              | 2                     |
| 421.27180    | C21H43O6P        | [M-H]-     | 0.244       | ↑                | Fatty Acyls [FA]          | 3.0                   | No              | 1                     |
| 332.19938    | C18H33NO2        | [M-2H+K]-  | 0.578       | ↑                | Fatty Acyls [FA]          | 3.0                   | No              | 1                     |
| 424.29816    | C26H45NO         | [M-2H+K]-  | 0.014       | ↑                | Fatty Acyls [FA]          | 3.0                   | No              | 3                     |
| 331.19148    | C20H28O4         | [M-H]-     | 1.638       | ↑                | Fatty Acyls [FA]          | 3.0                   | No              | 1                     |
| 399.21762    | C24H32O5         | [M-H]-     | 1.165       | ↑                | Fatty Acyls [FA]          | 3.1                   | No              | 2                     |
| 425.26970    | C27H38O4         | [M-H]-     | 1.204       | ↑                | Fatty Acyls [FA]          | 3.1                   | No              | 1                     |
| 381.24080    | C23H36O3         | [M-2H+Na]- | 0.616       | ↑                | Fatty Acyls [FA]          | 3.1                   | No              | 2                     |
| 469.33193    | C30H46O4         | [M-H]-     | 0.312       | ↑                | Fatty Acyls [FA]          | 3.1                   | No              | 1                     |
| 423.29047    | C28H40O3         | [M-H]-     | 1.302       | ↑                | Fatty Acyls [FA]          | 3.1                   | No              | 2                     |
| 454.30873    | C27H47NO2        | [M-2H+K]-  | 0.007       | ↑                | Fatty Acyls [FA]          | 3.1                   | No              | 3                     |
| 397.23828    | C25H34O4         | [M-H]-     | 0.997       | ↑                | Fatty Acyls [FA]          | 3.1                   | No              | 2                     |
| 408.23053    | C24H37NO2        | [M-2H+K]-  | 0.111       | ↑                | Fatty Acyls [FA]          | 3.2                   | No              | 2                     |
| 397.33217    | C24H46O4         | [M-H]-     | 0.968       | ↑                | Fatty Acyls [FA]          | 3.2                   | No              | 2                     |
| 415.24869    | C25H36O5         | [M-H]-     | 0.576       | ↑                | Fatty Acyls [FA]          | 3.2                   | No              | 3                     |
| 329.16916    | C16H30F2O2       | [M-2H+K]-  | 0.865       | ↑                | Fatty Acyls [FA]          | 3.3                   | No              | 3                     |
| 453.33770    | C30H46O3         | [M-H]-     | 1.829       | ↑                | Fatty Acyls [FA]          | 3.3                   | No              | 3                     |
| 411.29030    | C27H40O3         | [M-H]-     | 0.932       | ↑                | Fatty Acyls [FA]          | 3.5                   | No              | 2                     |
| 423.25020    | C20H41O7P        | [M-H]-     | 2.287       | ↑                | Fatty Acyls [FA]          | 3.5                   | No              | 2                     |
| 714.50860    | C39H74NO8P       | [M-H]-     | 1.703       | ↑                | Glycerolipids [GL]        | 3.0                   | No              | 1                     |
| 754.48093    | C39H76NO8P       | [M-2H+K]-  | 2.670       | ↑                | Glycerolipids [GL]        | 3.3                   | No              | 1                     |
| 447.00110    | C17H14O11S       | [M-2H+Na]- | 2.903       | ↑*               | Fatty Acyls [FA]          | 3.0                   | No              | 3                     |
| 341.02830    | C15H12O8         | [M-2H+Na]- | 2.807       | ↑*               | Fatty Acyls [FA]          | 3.0                   | No              | 1                     |
| 423.21767    | C26H32O5         | [M-H]-     | 1.233       | ↑*               | Fatty Acyls [FA]          | 3.1                   | No              | 1                     |
| 413.04933    | C18H16O10        | [M-2H+Na]- | 2.094       | ↑*               | Fatty Acyls [FA]          | 3.2                   | No              | 3                     |
| 485.06853    | C21H20O12        | [M-2H+Na]- | 2.211       | ↑*               | Fatty Acyls [FA]          | 3.3                   | No              | 1                     |
| 699.09121    | C24H45Cl5O8S2    | [M-H]-     | 1.179       | ↑*               | Fatty Acyls [FA]          | 3.3                   | No              | 3                     |
| 515.02188    | C21H18O13        | [M-2H+K]-  | 1.788       | ↑*               | Fatty Acyls [FA]          | 3.3                   | No              | 2                     |
| 544.06004    | C23H23O13        | [M-2H+K]-  | 3.479       | ↑*               | Fatty Acyls [FA]          | 3.3                   | No              | 3                     |
| 499.05057    | C21H18O13        | [M-2H+Na]- | 3.424       | ↑*               | Fatty Acyls [FA]          | 5.0                   | No              | 2                     |
| 653.05774    | C28H24O16        | [M-2H+K]-  | 4.971       | ↓                | Polyketides [PK]          | 3.4                   | No              | 1                     |
| 282.27920    | C18H35NO         | [M+H]+     | 1.732       | ↓*               | Fatty Acyls [FA]          | 3.3                   | No              | 1                     |
| 659.62870    | C42H84O3         | [M+Na]+    | 4.722       | ↓*               | Fatty Acyls [FA]          | 4.2                   | No              | 3                     |
| 561.48845    | C36H64O4         | [M+H]+     | 0.292       | ↓*               | Fatty Acyls [FA]          | 8.6                   | No              | 1                     |
| 757.60900    | C46H86O5         | [M+K]+     | 2.949       | ↓*               | Glycerolipids [GL]        | 3.1                   | No              | 3                     |
| 591.49777    | C37H66O5         | [M+H]+     | 1.830       | ↓*               | Glycerolipids [GL]        | 3.3                   | No              | 3                     |
| 799.53790    | C47H74O10        | [M+H]+     | 2.344       | ↓*               | Glycerolipids [GL]        | 4.3                   | No              | 2                     |
| 767.47210    | C45H66O10        | [M+H]+     | 1.728       | ↓*               | Glycerolipids [GL]        | 4.9                   | No              | 3                     |
| 726.46930    | C37H70NO9P       | [M+Na]+    | 0.976       | ↓*               | Glycerophospholipids [GP] | 3.0                   | Yes             | 1                     |
| 593.41970    | C31H61O8P        | [M+H]+     | 2.470       | ↓*               | Glycerophospholipids [GP] | 3.0                   | Yes             | 3                     |
| 741.49200    | C37H73O12P       | [M+H]+     | 0.278       | ↓*               | Glycerophospholipids [GP] | 3.0                   | Yes             | 2                     |
| 662.50920    | C36H72NO7P       | [M+H]+     | 4.931       | ↓*               | Glycerophospholipids [GP] | 3.1                   | Yes             | 3                     |
| 772.55970    | C41H84NO7P       | [M+K]+     | 3.301       | ↓*               | Glycerophospholipids [GP] | 3.1                   | Yes             | 3                     |
| 636.45890    | C33H66NO8P       | [M+H]+     | 2.407       | ↓*               | Glycerophospholipids [GP] | 3.2                   | Yes             | 1                     |
| 753.50960    | C42H73O9P        | [M+H]+     | 3.386       | ↓*               | Glycerophospholipids [GP] | 3.2                   | Yes             | 3                     |
| 724.48970    | C40H70NO8P       | [M+H]+     | 2.805       | ↓*               | Glycerophospholipids [GP] | 3.2                   | Yes             | 1                     |
| 742.47973    | C38H74NO8P       | [M+K]+     | 1.098       | ↓*               | Glycerophospholipids [GP] | 3.2                   | Yes             | 3                     |
| 754.47966    | C39H74NO8P       | [M+K]+     | 0.987       | ↓*               | Glycerophospholipids [GP] | 3.2                   | Yes             | 2                     |
| 779.48126    | C41H73O10P       | [M+Na]+    | 3.402       | ↓*               | Glycerophospholipids [GP] | 3.3                   | Yes             | 2                     |
| 700.49070    | C38H70NO8P       | [M+H]+     | 1.473       | ↓*               | Glycerophospholipids [GP] | 3.3                   | Yes             | 2                     |
| 772.50840    | C39H76NO10P      | [M+Na]+    | 2.663       | ↓*               | Glycerophospholipids [GP] | 3.3                   | Yes             | 1                     |
| 709.47950    | C40H69O8P        | [M+H]+     | 1.880       | ↓*               | Glycerophospholipids [GP] | 3.4                   | Yes             | 1                     |
| 740.48760    | C40H70NO9P       | [M+H]+     | 1.287       | ↓*               | Glycerophospholipids [GP] | 3.4                   | Yes             | 1                     |
| 776.51951    | C44H74NO8P       | [M+H]+     | 4.531       | ↓*               | Glycerophospholipids [GP] | 3.4                   | Yes             | 3                     |
| 792.47830    | C43H70NO10P      | [M+H]+     | 4.116       | ↓*               | Glycerophospholipids [GP] | 3.5                   | Yes             | 1                     |
| 792.51880    | C44H74NO9P       | [M+H]+     | 1.075       | ↓*               | Glycerophospholipids [GP] | 3.5                   | Yes             | 2                     |
| 653.36060    | C33H59O8P        | [M+K]+     | 3.266       | ↓*               | Glycerophospholipids [GP] | 3.5                   | Yes             | 3                     |
| 736.48950    | C41H70NO8P       | [M+H]+     | 3.031       | ↓*               | Glycerophospholipids [GP] | 3.6                   | Yes             | 1                     |
| 742.54030    | C41H76NO8P       | [M+H]+     | 2.178       | ↓*               | Glycerophospholipids [GP] | 3.6                   | Yes             | 3                     |
| 522.39200    | C27H56NO6P       | [M+H]+     | 0.674       | ↓*               | Glycerophospholipids [GP] | 3.7                   | Yes             | 3                     |
| 723.49800    | C41H71O8P        | [M+H]+     | 2.095       | ↓*               | Glycerophospholipids [GP] | 3.8                   | Yes             | 3                     |
| 752.52210    | C42H74NO8P       | [M+H]+     | 1.240       | ↓*               | Glycerophospholipids [GP] | 3.9                   | Yes             | 2                     |
| 775.50760    | C43H77O7P        | [M+K]+     | 4.125       | ↓*               | Glycerophospholipids [GP] | 3.9                   | Yes             | 2                     |
| 774.53820    | C43H78NO7P       | [M+Na]+    | 4.082       | ↓*               | Glycerophospholipids [GP] | 3.9                   | Yes             | 2                     |
| 616.35980    | C29H56NO9P       | [M+Na]+    | 1.231       | ↓*               | Glycerophospholipids [GP] | 4.0                   | Yes             | 1                     |
| 757.49871    | C41H73O10P       | [M+H]+     | 4.289       | ↓*               | Glycerophospholipids [GP] | 4.2                   | Yes             | 2                     |
| 656.42800    | C35H62NO8P       | [M+H]+     | 1.724       | ↓*               | Glycerophospholipids [GP] | 4.3                   | Yes             | 3                     |
| 672.45780    | C36H66NO8P       | [M+H]+     | 3.914       | ↓*               | Glycerophospholipids [GP] | 4.4                   | Yes             | 2                     |
| 686.44013    | C34H66NO9P       | [M+Na]+    | 4.129       | ↓*               | Glycerophospholipids [GP] | 4.4                   | Yes             | 1                     |
| 686.50820    | C36H74NO7P       | [M+Na]+    | 2.712       | ↓*               | Glycerophospholipids [GP] | 4.5                   | Yes             | 1                     |
| 669.44770    | C37H65O8P        | [M+H]+     | 2.740       | ↓*               | Glycerophospholipids [GP] | 4.5                   | Yes             | 1                     |
| 786.60170    | C44H84NO8P       | [M+H]+     | 0.530       | ↓*               | Glycerophospholipids [GP] | 4.5                   | Yes             | 2                     |
| 698.47770    | C38H68NO8P       | [M+H]+     | 2.316       | ↓*               | Glycerophospholipids [GP] | 4.5                   | Yes             | 2                     |
| 712.48986    | C39H70NO8P       | [M+H]+     | 2.623       | ↓*               | Glycerophospholipids [GP] | 4.5                   | Yes             | 2                     |
| 760.48800    | C43H70NO8P       | [M+H]+     | 4.907       | ↓*               | Glycerophospholipids [GP] | 4.6                   | Yes             | 2                     |



|           |             |                     |       |    |                           |      |     |   |
|-----------|-------------|---------------------|-------|----|---------------------------|------|-----|---|
| 765.46776 | C42H69O10P  | [M+H] <sup>+</sup>  | 3.800 | ↓* | Glycerophospholipids [GP] | 5.1  | Yes | 1 |
| 746.57000 | C41H80NO8P  | [M+H] <sup>+</sup>  | 0.023 | ↓* | Glycerophospholipids [GP] | 5.1  | Yes | 1 |
| 729.57770 | C42H81O7P   | [M+H] <sup>+</sup>  | 2.904 | ↓* | Glycerophospholipids [GP] | 5.3  | Yes | 1 |
| 787.49016 | C40H77O10P  | [M+K] <sup>+</sup>  | 1.290 | ↓* | Glycerophospholipids [GP] | 5.9  | Yes | 3 |
| 684.45810 | C37H66NO8P  | [M+H] <sup>+</sup>  | 3.407 | ↓* | Glycerophospholipids [GP] | 6.5  | Yes | 2 |
| 688.49220 | C37H70NO8P  | [M+H] <sup>+</sup>  | 0.680 | ↓* | Glycerophospholipids [GP] | 6.5  | Yes | 2 |
| 730.53950 | C40H76NO8P  | [M+H] <sup>+</sup>  | 1.118 | ↓* | Glycerophospholipids [GP] | 7.0  | Yes | 2 |
| 754.53850 | C42H76NO8P  | [M+H] <sup>+</sup>  | 0.243 | ↓* | Glycerophospholipids [GP] | 7.0  | Yes | 3 |
| 702.50790 | C38H72NO8P  | [M+H] <sup>+</sup>  | 0.737 | ↓* | Glycerophospholipids [GP] | 7.1  | Yes | 2 |
| 714.50964 | C39H72NO8P  | [M+H] <sup>+</sup>  | 3.163 | ↓* | Glycerophospholipids [GP] | 7.4  | Yes | 3 |
| 718.53950 | C39H76NO8P  | [M+H] <sup>+</sup>  | 1.137 | ↓* | Glycerophospholipids [GP] | 11.5 | Yes | 3 |
| 690.50820 | C37H72NO8P  | [M+H] <sup>+</sup>  | 1.185 | ↓* | Glycerophospholipids [GP] | 15.6 | Yes | 2 |
| 585.27140 | C32H40O10   | [M+H] <sup>+</sup>  | 2.433 | ↓* | Prenol Lipids [PR]        | 3.0  | No  | 1 |
| 529.46190 | C35H60O3    | [M+H] <sup>+</sup>  | 0.323 | ↓* | Prenol Lipids [PR]        | 3.0  | No  | 3 |
| 499.35780 | C35H46O2    | [M+H] <sup>+</sup>  | 0.388 | ↓* | Prenol Lipids [PR]        | 3.2  | No  | 1 |
| 545.45840 | C35H60O4    | [M+H] <sup>+</sup>  | 2.592 | ↓* | Prenol Lipids [PR]        | 3.6  | No  | 1 |
| 549.42890 | C35H58O3    | [M+Na] <sup>+</sup> | 0.974 | ↓* | Prenol Lipids [PR]        | 3.9  | No  | 2 |
| 712.44000 | C34H66NO12P | [M+H] <sup>+</sup>  | 0.129 | ↓* | Saccharolipids [SL]       | 4.2  | No  | 2 |
| 733.61960 | C41H85N2O6P | [M+H] <sup>+</sup>  | 3.750 | ↓* | Sphingolipids [SP]        | 3.6  | No  | 2 |
| 451.37820 | C28H50O4    | [M+H] <sup>+</sup>  | 1.187 | ↓* | Sterol Lipids [ST]        | 3.0  | Yes | 3 |
| 789.46120 | C40H68O15   | [M+H] <sup>+</sup>  | 3.105 | ↓* | Sterol Lipids [ST]        | 3.4  | Yes | 3 |
| 611.41820 | C34H58O9    | [M+H] <sup>+</sup>  | 3.744 | ↓* | Sterol Lipids [ST]        | 3.4  | Yes | 2 |
| 801.43050 | C40H64O16   | [M+H] <sup>+</sup>  | 4.035 | ↓* | Sterol Lipids [ST]        | 4.1  | Yes | 1 |
| 564.26830 | C26H45NO8S2 | [M+H] <sup>+</sup>  | 3.208 | ↓* | Sterol Lipids [ST]        | 6.9  | Yes | 3 |

Supplemental Table 10:

DPB635 50ng/mL 30 min. exposure, up/downregulated lipids

| Measured m/z | Chemical Formula | Adduct     | Error (ppm) | Up/downregulated | Lipid Category            | Absolute(Fold Change) | IS Confirmation | No. of Batches (of 3) |
|--------------|------------------|------------|-------------|------------------|---------------------------|-----------------------|-----------------|-----------------------|
| 227.20078    | C14H28O2         | [M-H]-     | 1.431       | ↑                | Fatty Acyls [FA]          | 3.2                   | No              | 2                     |
| 269.24867    | C17H34O2         | [M-H]-     | 2.276       | ↑                | Fatty Acyls [FA]          | 4.9                   | No              | 2                     |
| 281.24851    | C18H34O2         | [M-H]-     | 1.601       | ↑                | Fatty Acyls [FA]          | 6.5                   | No              | 2                     |
| 295.22757    | C18H32O3         | [M-H]-     | 0.844       | ↑                | Fatty Acyls [FA]          | 3.2                   | No              | 3                     |
| 297.27979    | C19H38O2         | [M-H]-     | 1.447       | ↑                | Fatty Acyls [FA]          | 4.6                   | No              | 2                     |
| 299.20156    | C20H28O2         | [M-H]-     | 1.528       | ↑                | Fatty Acyls [FA]          | 3.4                   | No              | 1                     |
| 309.27965    | C20H38O2         | [M-H]-     | 0.938       | ↑                | Fatty Acyls [FA]          | 4.9                   | No              | 2                     |
| 311.25904    | C19H36O3         | [M-H]-     | 1.340       | ↑                | Fatty Acyls [FA]          | 3.4                   | No              | 2                     |
| 313.18067    | C20H26O3         | [M-H]-     | 0.953       | ↑                | Fatty Acyls [FA]          | 3.5                   | No              | 2                     |
| 313.23830    | C18H34O4         | [M-H]-     | 1.331       | ↑                | Fatty Acyls [FA]          | 3.1                   | No              | 2                     |
| 317.21216    | C20H30O3         | [M-H]-     | 1.555       | ↑                | Fatty Acyls [FA]          | 4.2                   | No              | 3                     |
| 319.22783    | C20H32O3         | [M-H]-     | 1.602       | ↑                | Fatty Acyls [FA]          | 3.0                   | No              | 2                     |
| 323.25910    | C20H36O3         | [M-H]-     | 1.482       | ↑                | Fatty Acyls [FA]          | 3.2                   | No              | 2                     |
| 329.16980    | C16H27F3O2       | [M-2H+Na]- | 1.929       | ↑                | Fatty Acyls [FA]          | 3.6                   | No              | 3                     |
| 331.19150    | C20H28O4         | [M-H]-     | 1.703       | ↑                | Fatty Acyls [FA]          | 4.1                   | No              | 1                     |
| 349.19962    | C18H32O5         | [M-2H+Na]- | 1.510       | ↑                | Fatty Acyls [FA]          | 3.3                   | No              | 1                     |
| 361.01933    | C16H19BrO2       | [M+K]+     | 3.379       | ↑                | Fatty Acyls [FA]          | 4.3                   | No              | 2                     |
| 419.32205    | C27H31D6FO2      | [M+H]+     | 1.405       | ↑                | Sterol Lipids [ST]        | 3.4                   | Yes             | 2                     |
| 435.18885    | C22H37BrO2       | [M+Na]+    | 3.185       | ↑                | Fatty Acyls [FA]          | 3.3                   | No              | 1                     |
| 436.28176    | C26H39NO3        | [M+Na]+    | 2.297       | ↑                | Fatty Acyls [FA]          | 6.1                   | No              | 3                     |
| 485.06864    | C21H20O12        | [M-2H+Na]- | 1.980       | ↑*               | Fatty Acyls [FA]          | 4.4                   | No              | 3                     |
| 561.48826    | C36H64O4         | [M+H]+     | 0.045       | ↓                | Fatty Acyls [FA]          | 4.3                   | No              | 3                     |
| 564.26830    | C26H45NO8S2      | [M+H]+     | 3.208       | ↓*               | Sterol Lipids [ST]        | 4.9                   | Yes             | 2                     |
| 656.42800    | C35H62NO8P       | [M+H]+     | 1.724       | ↓                | Glycerophospholipids [GP] | 3.1                   | Yes             | 1                     |
| 672.45780    | C36H66NO8P       | [M+H]+     | 3.914       | ↓                | Glycerophospholipids [GP] | 3.4                   | Yes             | 2                     |
| 684.45810    | C37H66NO8P       | [M+H]+     | 3.407       | ↓                | Glycerophospholipids [GP] | 4.7                   | Yes             | 3                     |
| 688.49220    | C37H70NO8P       | [M+H]+     | 0.680       | ↓                | Glycerophospholipids [GP] | 3.4                   | Yes             | 3                     |
| 690.50798    | C37H72NO8P       | [M+H]+     | 0.873       | ↓                | Glycerophospholipids [GP] | 8.2                   | Yes             | 2                     |
| 698.47770    | C38H68NO8P       | [M+H]+     | 2.316       | ↓                | Glycerophospholipids [GP] | 3.4                   | Yes             | 1                     |
| 700.49070    | C38H70NO8P       | [M+H]+     | 1.473       | ↓                | Glycerophospholipids [GP] | 3.1                   | Yes             | 2                     |
| 702.50790    | C38H72NO8P       | [M+H]+     | 0.737       | ↓                | Glycerophospholipids [GP] | 3.9                   | Yes             | 3                     |
| 712.44000    | C34H66NO12P      | [M+H]+     | 0.129       | ↓                | Saccharolipids [SL]       | 3.2                   | No              | 1                     |
| 714.50973    | C39H72NO8P       | [M+H]+     | 3.290       | ↓                | Glycerophospholipids [GP] | 4.9                   | Yes             | 1                     |
| 718.53902    | C39H76NO8P       | [M+H]+     | 0.471       | ↓                | Glycerophospholipids [GP] | 5.5                   | Yes             | 2                     |
| 726.50904    | C40H72NO8P       | [M+H]+     | 2.275       | ↓                | Glycerophospholipids [GP] | 4.8                   | Yes             | 3                     |
| 730.53870    | C40H76NO8P       | [M+H]+     | 0.026       | ↓                | Glycerophospholipids [GP] | 4.9                   | Yes             | 1                     |
| 736.48950    | C41H70NO8P       | [M+H]+     | 3.031       | ↓                | Glycerophospholipids [GP] | 3.3                   | Yes             | 3                     |
| 748.45123    | C37H65NO14       | [M+H]+     | 3.867       | ↑                | Polyketides [PK]          | 3.1                   | No              | 2                     |
| 754.53778    | C42H76NO8P       | [M+H]+     | 1.197       | ↓                | Glycerophospholipids [GP] | 4.6                   | Yes             | 3                     |
| 787.48946    | C40H77O10P       | [M+K]+     | 0.395       | ↓                | Glycerophospholipids [GP] | 3.7                   | Yes             | 1                     |
| 857.54980    | C44H85O12P       | [M-2H+Na]- | 2.551       | ↓*               | Glycerophospholipids [GP] | 3.0                   | Yes             | 3                     |
| 906.63800    | C48H91NO12S      | [M+H]+     | 4.381       | ↓*               | Sphingolipids [SP]        | 3.5                   | No              | 3                     |
| 933.55110    | C51H81O13P       | [M+H]+     | 1.918       | ↓*               | Glycerophospholipids [GP] | 4.0                   | Yes             | 3                     |
| 934.66970    | C52H98NO8P       | [M+K]+     | 3.194       | ↓*               | Glycerophospholipids [GP] | 5.0                   | Yes             | 1                     |
| 967.86998    | C63H116O6        | [M-H]-     | 0.629       | ↑                | Sphingolipids [SP]        | 4.3                   | No              | 2                     |
| 975.83170    | C62H114O6        | [M-2H+Na]- | 4.059       | ↑                | Sphingolipids [SP]        | 3.8                   | No              | 1                     |
| 984.83990    | C58H116NO8P      | [M-H]-     | 3.927       | ↑                | Sphingolipids [SP]        | 4.1                   | No              | 2                     |

Supplemental Table 11:

DPB635 25 ng/mL 60min exposure, up/downregulated lipids

| Measured m/z | Chemical Formula | Adduct     | Error (ppm) | Up/downregulated | Lipid Category            | Absolute(fold change) | IS Confirmation | No. of Batches (of 3) |
|--------------|------------------|------------|-------------|------------------|---------------------------|-----------------------|-----------------|-----------------------|
| 363.29045    | C23H40O3         | [M-H]-     | 1.455       | ↑                | Fatty Acyls [FA]          | 3.0                   | No              | 1                     |
| 363.21771    | C21H32O5         | [M-H]-     | 1.537       | ↑                | Fatty Acyls [FA]          | 3.0                   | No              | 3                     |
| 367.24909    | C21H36O5         | [M-H]-     | 1.734       | ↑                | Fatty Acyls [FA]          | 3.0                   | No              | 3                     |
| 401.26984    | C25H38O4         | [M-H]-     | 1.632       | ↑                | Fatty Acyls [FA]          | 3.0                   | No              | 3                     |
| 327.21783    | C18H32O5         | [M-H]-     | 2.066       | ↑                | Fatty Acyls [FA]          | 3.0                   | No              | 2                     |
| 395.28035    | C23H40O5         | [M-H]-     | 1.506       | ↑                | Fatty Acyls [FA]          | 3.0                   | No              | 3                     |
| 425.34248    | C29H46O2         | [M-H]-     | 1.220       | ↑                | Fatty Acyls [FA]          | 3.0                   | No              | 1                     |
| 419.38943    | C28H52O2         | [M-H]-     | 1.246       | ↑                | Fatty Acyls [FA]          | 3.0                   | No              | 2                     |
| 309.27971    | C20H38O2         | [M-H]-     | 1.133       | ↑                | Fatty Acyls [FA]          | 3.1                   | No              | 1                     |
| 415.32165    | C27H44O3         | [M-H]-     | 1.035       | ↑                | Fatty Acyls [FA]          | 3.1                   | No              | 2                     |
| 440.28883    | C24H41N3O3       | [M-2H+Na]- | 0.176       | ↑                | Fatty Acyls [FA]          | 3.1                   | No              | 2                     |
| 407.38937    | C27H52O2         | [M-H]-     | 1.141       | ↑                | Fatty Acyls [FA]          | 3.1                   | No              | 2                     |
| 401.33913    | C25H48O2         | [M-2H+Na]- | 1.052       | ↑                | Fatty Acyls [FA]          | 3.1                   | No              | 2                     |
| 409.36888    | C26H50O3         | [M-H]-     | 1.721       | ↑                | Fatty Acyls [FA]          | 3.2                   | No              | 1                     |
| 425.26986    | C27H38O4         | [M-H]-     | 1.594       | ↑                | Fatty Acyls [FA]          | 3.2                   | No              | 1                     |
| 413.34241    | C28H46O2         | [M-H]-     | 1.109       | ↑                | Fatty Acyls [FA]          | 3.2                   | No              | 1                     |
| 407.28023    | C24H40O5         | [M-H]-     | 1.188       | ↑                | Fatty Acyls [FA]          | 3.3                   | No              | 1                     |
| 427.35824    | C29H48O2         | [M-H]-     | 1.474       | ↑                | Fatty Acyls [FA]          | 3.4                   | No              | 1                     |
| 416.22059    | C22H37NO4        | [M-2H+K]-  | 0.647       | ↑                | Fatty Acyls [FA]          | 4.1                   | No              | 2                     |
| 441.29756    | C26H42O4         | [M+Na]+    | 1.178       | ↑                | Fatty Acyls [FA]          | 7.6                   | No              | 2                     |
| 690.50784    | C37H74NO8P       | [M-H]-     | 0.659       | ↑                | Glycerolipids [GL]        | 3.9                   | No              | 1                     |
| 503.08095    | C23H20O13        | [M-H]-     | 3.215       | ↑*               | Fatty Acyls [FA]          | 3.0                   | No              | 3                     |
| 499.04895    | C21H18O13        | [M-2H+Na]- | 0.178       | ↑*               | Fatty Acyls [FA]          | 3.2                   | No              | 1                     |
| 699.09144    | C24H45Cl5O8S2    | [M-H]-     | 0.839       | ↑*               | Fatty Acyls [FA]          | 3.8                   | No              | 2                     |
| 413.04945    | C18H16O10        | [M-2H+Na]- | 2.372       | ↑*               | Fatty Acyls [FA]          | 4.0                   | No              | 1                     |
| 423.21794    | C26H32O5         | [M-H]-     | 1.871       | ↑*               | Fatty Acyls [FA]          | 4.5                   | No              | 2                     |
| 493.06106    | C21H18O14        | [M-H]-     | 1.572       | ↑*               | Fatty Acyls [FA]          | 4.6                   | No              | 1                     |
| 331.11872    | C18H20O6         | [M-H]-     | 1.672       | ↑*               | Fatty Acyls [FA]          | 6.5                   | No              | 2                     |
| 313.10814    | C18H18O5         | [M-H]-     | 1.710       | ↑*               | Fatty Acyls [FA]          | 8.7                   | No              | 1                     |
| 773.52224    | C45H72O10        | [M+H]+     | 2.404       | ↓                | Glycerolipids [GL]        | 3.1                   | No              | 2                     |
| 769.49957    | C42H73O10P       | [M+H]+     | 3.108       | ↓                | Glycerophospholipids [GP] | 3.0                   | Yes             | 3                     |
| 793.49830    | C44H73O10P       | [M+H]+     | 4.618       | ↓                | Glycerophospholipids [GP] | 3.1                   | Yes             | 3                     |
| 797.53243    | C44H77O10P       | [M+H]+     | 1.041       | ↓                | Glycerophospholipids [GP] | 3.3                   | Yes             | 1                     |
| 690.50787    | C37H72NO8P       | [M+H]+     | 0.711       | ↓                | Glycerophospholipids [GP] | 3.5                   | Yes             | 3                     |
| 684.45810    | C37H66NO8P       | [M+H]+     | 3.407       | ↓                | Glycerophospholipids [GP] | 3.5                   | Yes             | 2                     |
| 738.50771    | C41H72NO8P       | [M+H]+     | 0.444       | ↓                | Glycerophospholipids [GP] | 4.1                   | Yes             | 3                     |
| 770.51053    | C43H74NO7P       | [M+Na]+    | 0.605       | ↓                | Glycerophospholipids [GP] | 4.2                   | Yes             | 1                     |
| 772.58760    | C43H82NO8P       | [M+H]+     | 2.546       | ↓*               | Glycerophospholipids [GP] | 3.0                   | Yes             | 2                     |
| 957.63970    | C52H93O13P       | [M+H]+     | 3.664       | ↓*               | Glycerophospholipids [GP] | 3.2                   | Yes             | 1                     |
| 881.47230    | C48H75O10P       | [M+K]+     | 1.357       | ↓*               | Glycerophospholipids [GP] | 3.3                   | Yes             | 1                     |
| 925.63190    | C50H95O10P       | [M+K]+     | 2.057       | ↓*               | Glycerophospholipids [GP] | 3.4                   | Yes             | 2                     |
| 794.56960    | C45H80NO8P       | [M+H]+     | 0.482       | ↓*               | Glycerophospholipids [GP] | 3.7                   | Yes             | 1                     |
| 806.47030    | C45H70NO8P       | [M+Na]+    | 4.186       | ↓*               | Glycerophospholipids [GP] | 3.9                   | Yes             | 1                     |
| 756.55230    | C42H78NO8P       | [M+H]+     | 2.687       | ↓*               | Glycerophospholipids [GP] | 4.5                   | Yes             | 1                     |
| 821.59970    | C46H87O8P        | [M+Na]+    | 4.781       | ↓*               | Glycerophospholipids [GP] | 5.4                   | Yes             | 3                     |
| 893.53830    | C52H76O12        | [M+H]+     | 3.588       | ↓*               | Prenol Lipids [PR]        | 4.4                   | No              | 3                     |
| 729.53100    | C38H79N2O6P      | [M+K]+     | 0.388       | ↓*               | Sphingolipids [SP]        | 3.2                   | No              | 1                     |
| 769.55930    | C41H83N2O6P      | [M+K]+     | 4.266       | ↓*               | Sphingolipids [SP]        | 4.3                   | No              | 3                     |
| 809.40970    | C40H66O14        | [M+K]+     | 0.904       | ↓*               | Sterol Lipids [ST]        | 3.3                   | Yes             | 1                     |

Supplemental Table 12:

DPB635 50 ng/mL 60 min. exposure, up/downregulated lipids

| Measured m/z | Chemical Formula | Adduct     | Error (ppm) | Up/downregulated | Lipid Category            | Absolute(fold change) | IS Confirmation | No. of Batches (of 3) |
|--------------|------------------|------------|-------------|------------------|---------------------------|-----------------------|-----------------|-----------------------|
| 397.20173    | C24H30O5         | [M-H]-     | 0.564       | ↑                | Fatty Acyls [FA]          | 3.0                   | No              | 2                     |
| 325.20200    | C18H30O5         | [M-H]-     | 1.542       | ↑                | Fatty Acyls [FA]          | 3.0                   | No              | 3                     |
| 313.23826    | C18H34O4         | [M-H]-     | 1.184       | ↑                | Fatty Acyls [FA]          | 3.0                   | No              | 1                     |
| 364.18897    | C18H33NO4        | [M-2H+K]-  | 0.124       | ↑                | Fatty Acyls [FA]          | 3.0                   | No              | 3                     |
| 412.26163    | C24H41NO2        | [M-2H+K]-  | 0.368       | ↑                | Fatty Acyls [FA]          | 3.0                   | No              | 3                     |
| 409.36860    | C26H50O3         | [M-H]-     | 1.041       | ↑                | Fatty Acyls [FA]          | 3.0                   | No              | 2                     |
| 421.27180    | C21H43O6P        | [M-H]-     | 0.244       | ↑                | Fatty Acyls [FA]          | 3.0                   | No              | 2                     |
| 413.34223    | C28H46O2         | [M-H]-     | 0.675       | ↑                | Fatty Acyls [FA]          | 3.0                   | No              | 1                     |
| 439.27990    | C27H43FO         | [M-2H+K]-  | 4.664       | ↑                | Fatty Acyls [FA]          | 3.1                   | No              | 1                     |
| 571.03793    | C22H20O16S       | [M-H]-     | 2.551       | ↑*               | Fatty Acyls [FA]          | 3.1                   | No              | 3                     |
| 424.29802    | C26H45NO         | [M-2H+K]-  | 0.347       | ↑                | Fatty Acyls [FA]          | 3.1                   | No              | 3                     |
| 395.38924    | C26H52O2         | [M-H]-     | 0.832       | ↑                | Fatty Acyls [FA]          | 3.1                   | No              | 1                     |
| 423.21759    | C26H32O5         | [M-H]-     | 1.048       | ↑*               | Fatty Acyls [FA]          | 3.1                   | No              | 3                     |
| 426.27800    | C25H43NO2        | [M-2H+K]-  | 1.323       | ↑                | Fatty Acyls [FA]          | 3.1                   | No              | 3                     |
| 331.19139    | C20H28O4         | [M-H]-     | 1.378       | ↑                | Fatty Acyls [FA]          | 3.1                   | No              | 1                     |
| 332.19928    | C18H33NO2        | [M-2H+K]-  | 0.278       | ↑                | Fatty Acyls [FA]          | 3.1                   | No              | 1                     |
| 407.21940    | C19H37O7P        | [M-H]-     | 1.149       | ↑                | Fatty Acyls [FA]          | 3.1                   | No              | 3                     |
| 313.18067    | C20H26O3         | [M-H]-     | 0.964       | ↑                | Fatty Acyls [FA]          | 3.1                   | No              | 3                     |
| 454.30850    | C27H47NO2        | [M-2H+K]-  | 0.512       | ↑                | Fatty Acyls [FA]          | 3.1                   | No              | 2                     |
| 447.00093    | C17H14O11S       | [M-2H+Na]- | 2.506       | ↑*               | Fatty Acyls [FA]          | 3.2                   | No              | 2                     |
| 383.22246    | C24H32O4         | [M-H]-     | 0.597       | ↑                | Fatty Acyls [FA]          | 3.2                   | No              | 2                     |
| 415.24862    | C25H36O5         | [M-H]-     | 0.415       | ↑                | Fatty Acyls [FA]          | 3.2                   | No              | 2                     |
| 397.23809    | C25H34O4         | [M-H]-     | 0.514       | ↑                | Fatty Acyls [FA]          | 3.2                   | No              | 3                     |
| 471.34752    | C30H48O4         | [M-H]-     | 0.180       | ↑                | Fatty Acyls [FA]          | 3.2                   | No              | 3                     |
| 408.23028    | C24H37NO2        | [M-2H+K]-  | 0.507       | ↑                | Fatty Acyls [FA]          | 3.2                   | No              | 3                     |
| 399.21780    | C24H32O5         | [M-H]-     | 1.626       | ↑                | Fatty Acyls [FA]          | 3.2                   | No              | 1                     |
| 423.29031    | C28H40O3         | [M-H]-     | 0.917       | ↑                | Fatty Acyls [FA]          | 3.3                   | No              | 1                     |
| 481.36831    | C32H50O3         | [M-H]-     | 0.286       | ↑                | Fatty Acyls [FA]          | 3.3                   | No              | 2                     |
| 455.28005    | C28H40O5         | [M-H]-     | 0.661       | ↑                | Fatty Acyls [FA]          | 3.3                   | No              | 3                     |
| 453.33770    | C30H46O3         | [M-H]-     | 1.829       | ↑                | Fatty Acyls [FA]          | 3.3                   | No              | 3                     |
| 397.33200    | C24H46O4         | [M-H]-     | 0.531       | ↑                | Fatty Acyls [FA]          | 3.3                   | No              | 2                     |
| 329.16969    | C16H27F3O2       | [M-2H+Na]- | 2.267       | ↑                | Fatty Acyls [FA]          | 3.4                   | No              | 1                     |
| 465.33760    | C31H46O3         | [M-H]-     | 1.567       | ↑                | Fatty Acyls [FA]          | 3.4                   | No              | 2                     |
| 425.26956    | C27H38O4         | [M-H]-     | 0.878       | ↑                | Fatty Acyls [FA]          | 3.4                   | No              | 2                     |
| 411.29020    | C27H40O3         | [M-H]-     | 0.688       | ↑                | Fatty Acyls [FA]          | 3.5                   | No              | 3                     |
| 699.09100    | C24H45Cl5O8S2    | [M-H]-     | 1.482       | ↑*               | Fatty Acyls [FA]          | 3.5                   | No              | 3                     |
| 423.25020    | C20H41O7P        | [M-H]-     | 2.287       | ↑                | Fatty Acyls [FA]          | 3.5                   | No              | 3                     |
| 485.06843    | C21H20O12        | [M-2H+Na]- | 2.415       | ↑*               | Fatty Acyls [FA]          | 3.5                   | No              | 3                     |
| 544.05980    | C23H23O13        | [M-2H+K]-  | 3.906       | ↑*               | Fatty Acyls [FA]          | 3.6                   | No              | 1                     |
| 537.00934    | C20H18O13S       | [M+K]+     | 2.192       | ↑                | Fatty Acyls [FA]          | 4.9                   | No              | 1                     |
| 727.48129    | C37H73N2O7P      | [M+K]+     | 2.809       | ↑                | Glycerophospholipids [GP] | 3.0                   | Yes             | 3                     |
| 794.56960    | C45H80NO8P       | [M+H]+     | 0.482       | ↓*               | Glycerophospholipids [GP] | 3.5                   | Yes             | 1                     |
| 776.46236    | C41H72NO8P       | [M+K]+     | 1.165       | ↓                | Glycerophospholipids [GP] | 3.6                   | Yes             | 2                     |
| 756.55230    | C42H78NO8P       | [M+H]+     | 2.687       | ↓*               | Glycerophospholipids [GP] | 4.1                   | Yes             | 1                     |
| 806.47030    | C45H70NO8P       | [M+Na]+    | 4.186       | ↓*               | Glycerophospholipids [GP] | 4.1                   | Yes             | 2                     |
| 893.53830    | C52H76O12        | [M+H]+     | 3.588       | ↓                | Prenol Lipids [PR]        | 3.0                   | No              | 1                     |
| 564.26830    | C26H45NO8S2      | [M+H]+     | 3.208       | ↓*               | Sterol Lipids [ST]        | 3.1                   | Yes             | 2                     |
| 447.04990    | C22H16O8         | [M+K]+     | 3.744       | ↑                | Sterol Lipids [ST]        | 5.0                   | Yes             | 3                     |

Supplemental Table 13:

DPB636 25 ng/mL 30min. Exposure, up/downregulated lipids

| Measured m/z | Chemical Formula | Adduct     | Error (ppm) | Up/downregulated | Lipid Category     | Absolute(fold change) | IS Confirmation | No. of Batches (of 3) |
|--------------|------------------|------------|-------------|------------------|--------------------|-----------------------|-----------------|-----------------------|
| 687.45825    | C35H71O9P        | [M-2H+Na]- | 0.809       | ↑*               | Glycerolipids [GL] | 3.0                   | No              | 1                     |
| 983.83763    | C61H118O6        | [M-2H+K]-  | 3.320       | ↑*               | Sphingolipids [SP] | 3.0                   | No              | 2                     |
| 495.07774    | C21H20O14        | [M-H]-     | 0.524       | ↑*               | Fatty Acyls [FA]   | 3.2                   | No              | 3                     |
| 985.82030    | C65H110O6        | [M-H]-     | 2.147       | ↑*               | Sphingolipids [SP] | 3.4                   | No              | 3                     |
| 673.48017    | C37H71O8P        | [M-H]-     | 0.988       | ↑*               | Glycerolipids [GL] | 4.4                   | No              | 1                     |
| 984.83240    | C58H116NO8P      | [M-H]-     | 3.689       | ↑*               | Sphingolipids [SP] | 4.4                   | No              | 3                     |
| 716.52161    | C39H76NO8P       | [M-H]-     | 1.986       | ↑*               | Glycerolipids [GL] | 4.4                   | No              | 3                     |
| 645.44878    | C35H67O8P        | [M-H]-     | 1.169       | ↑*               | Glycerolipids [GL] | 6.6                   | No              | 3                     |
| 688.49104    | C37H72NO8P       | [M-H]-     | 1.005       | ↑*               | Glycerolipids [GL] | 8.5                   | No              | 2                     |

Supplemental Table 14:

DPB636 50ng/mL 30 min. exposure, up/downregulated lipids

| Measured m/z | Chemical Formula | Adduct     | Error (ppm) | Up/downregulated | Lipid Category            | Absolute(fold change) | IS Confirmation | No. of Batches (of 3) |
|--------------|------------------|------------|-------------|------------------|---------------------------|-----------------------|-----------------|-----------------------|
| 329.16980    | C16H27F3O2       | [M-2H+Na]- | 1.929       | ↑                | Fatty Acyls [FA]          | 3.7                   | No              | 1                     |
| 261.22247    | C18H30O          | [M-H]-     | 2.393       | ↑*               | Fatty Acyls [FA]          | 4.1                   | No              | 3                     |
| 385.30794    | C24H44O2         | [M-2H+Na]- | 0.799       | ↑*               | Fatty Acyls [FA]          | 4.6                   | No              | 1                     |
| 373.30823    | C23H44O2         | [M-2H+Na]- | 0.066       | ↑*               | Fatty Acyls [FA]          | 5.7                   | No              | 2                     |
| 403.32167    | C26H44O3         | [M-H]-     | 1.108       | ↑*               | Fatty Acyls [FA]          | 6.4                   | No              | 2                     |
| 702.47223    | C37H70NO9P       | [M-H]-     | 1.760       | ↑*               | Glycerolipids [GL]        | 3.5                   | No              | 2                     |
| 732.48138    | C38H72NO10P      | [M-H]-     | 0.247       | ↑*               | Glycerolipids [GL]        | 3.7                   | No              | 3                     |
| 872.48099    | C46H78NO10P      | [M-2H+K]-  | 3.904       | ↑*               | Glycerolipids [GL]        | 5.2                   | No              | 2                     |
| 892.54820    | C47H86NO10P      | [M-2H+K]-  | 1.350       | ↓*               | Glycerophospholipids [GP] | 3.0                   | Yes             | 1                     |
| 705.47237    | C37H69O10P       | [M+H]+     | 2.414       | ↓*               | Glycerophospholipids [GP] | 3.2                   | Yes             | 3                     |
| 771.51813    | C42H75O10P       | [M+H]+     | 0.666       | ↓*               | Glycerophospholipids [GP] | 3.3                   | Yes             | 1                     |
| 869.55070    | C47H83O12P       | [M-H]-     | 4.248       | ↓*               | Glycerophospholipids [GP] | 3.3                   | Yes             | 3                     |
| 729.46916    | C39H69O10P       | [M+H]+     | 2.060       | ↑*               | Glycerophospholipids [GP] | 3.4                   | Yes             | 2                     |
| 754.46780    | C40H68NO10P      | [M+H]+     | 2.502       | ↑*               | Glycerophospholipids [GP] | 3.4                   | Yes             | 1                     |
| 755.47080    | C37H71O13P       | [M+H]+     | 0.343       | ↑*               | Glycerophospholipids [GP] | 3.6                   | Yes             | 1                     |
| 714.51980    | C38H80NO6P       | [M-2H+K]-  | 0.819       | ↓*               | Glycerophospholipids [GP] | 3.6                   | Yes             | 3                     |
| 779.47010    | C39H71O13P       | [M+H]+     | 1.230       | ↑*               | Glycerophospholipids [GP] | 3.8                   | Yes             | 2                     |
| 747.51876    | C40H77O10P       | [M-H]-     | 1.531       | ↓*               | Glycerophospholipids [GP] | 3.8                   | Yes             | 3                     |
| 871.56830    | C47H85O12P       | [M-H]-     | 2.001       | ↓                | Glycerophospholipids [GP] | 4.1                   | Yes             | 1                     |
| 856.54830    | C44H86NO10P      | [M-2H+K]-  | 1.524       | ↓*               | Glycerophospholipids [GP] | 4.9                   | Yes             | 2                     |
| 723.52880    | C40H77O7P        | [M+Na]+    | 2.298       | ↑                | Glycerophospholipids [GP] | 6.4                   | Yes             | 2                     |
| 654.06130    | C28H25O16        | [M-2H+K]-  | 1.569       | ↓                | Polyketides [PK]          | 3.0                   | No              | 2                     |
| 984.83990    | C58H116NO8P      | [M-H]-     | 3.927       | ↑*               | Sphingolipids [SP]        | 3.7                   | No              | 3                     |

Supplemental Table 15:

DPB636 25 ng/mL 60 min. exposure, up/downregulated lipids

| Measured m/z | Chemical Formula | Adduct     | Error (ppm) | Up/downregulated | Lipid Category            | Absolute(fold change) | IS Confirmation | No. of Batches (of 3) |
|--------------|------------------|------------|-------------|------------------|---------------------------|-----------------------|-----------------|-----------------------|
| 426.98980    | C18H22Br2O2      | [M-H]-     | 2.411       | ↑*               | Fatty Acyls [FA]          | 3.0                   | No              | 2                     |
| 265.21755    | C17H30O2         | [M-H]-     | 2.993       | ↑                | Fatty Acyls [FA]          | 3.2                   | No              | 2                     |
| 414.24120    | C23H39NO3        | [M-2H+K]-  | 0.360       | ↑*               | Fatty Acyls [FA]          | 3.2                   | No              | 2                     |
| 385.30779    | C24H44O2         | [M-2H+Na]- | 1.184       | ↑*               | Fatty Acyls [FA]          | 3.4                   | No              | 1                     |
| 400.29865    | C22H35D4NO5      | [M-H]-     | 2.625       | ↑*               | Fatty Acyls [FA]          | 3.6                   | No              | 2                     |
| 412.28905    | C23H43NO3S       | [M-H]-     | 1.231       | ↑*               | Fatty Acyls [FA]          | 3.9                   | No              | 3                     |
| 397.30795    | C25H44O2         | [M-2H+Na]- | 0.745       | ↑*               | Fatty Acyls [FA]          | 4.0                   | No              | 2                     |
| 412.26200    | C24H41NO2        | [M-2H+K]-  | 0.519       | ↑*               | Fatty Acyls [FA]          | 4.2                   | No              | 1                     |
| 682.54840    | C40H73N3O4       | [M+Na]+    | 2.162       | ↑                | Glycerophospholipids [GP] | 3.0                   | Yes             | 3                     |
| 407.21872    | C19H37O7P        | [M-H]-     | 2.809       | ↑*               | Glycerophospholipids [GP] | 3.9                   | Yes             | 3                     |
| 743.49830    | C39H77O8P        | [M+K]+     | 1.367       | ↑                | Glycerophospholipids [GP] | 4.2                   | Yes             | 2                     |
| 995.90210    | C65H118O6        | [M+H]+     | 1.439       | ↑                | Prenol Lipids [PR]        | 3.7                   | No              | 1                     |
| 417.33762    | C27H46O3         | [M-H]-     | 1.786       | ↑*               | Sterol Lipids [ST]        | 4.3                   | Yes             | 1                     |
| 429.33762    | C28H46O3         | [M-H]-     | 1.745       | ↑*               | Sterol Lipids [ST]        | 4.6                   | Yes             | 1                     |

Supplemental Table 16:

DPB636 50ng/mL 60 min. exposure, up/downregulated lipids

| Measured m/z | Chemical Formula | Adduct     | Error (ppm) | Up/downregulated | Lipid Category      | Absolute(fold change) | IS Confirmation | No. of Batches (of 3) |
|--------------|------------------|------------|-------------|------------------|---------------------|-----------------------|-----------------|-----------------------|
| 641.09024    | C28H28O15        | [M-2H+K]-  | 1.009       | ↑*               | Fatty Acyls [FA]    | 26.6                  | No              | 2                     |
| 747.51865    | C40H77O10P       | [M-H]-     | 1.389       | ↑*               | Fatty Acyls [FA]    | 6.8                   | No              | 1                     |
| 645.45022    | C35H67O8P        | [M-H]-     | 1.067       | ↑*               | Fatty Acyls [FA]    | 5.6                   | No              | 1                     |
| 714.50817    | C39H74NO8P       | [M-H]-     | 1.108       | ↑*               | Fatty Acyls [FA]    | 5.4                   | No              | 3                     |
| 485.06875    | C21H20O12        | [M-2H+Na]- | 1.747       | ↑*               | Fatty Acyls [FA]    | 4.6                   | No              | 3                     |
| 654.06097    | C28H25O16        | [M-2H+K]-  | 2.069       | ↑*               | Fatty Acyls [FA]    | 4.1                   | No              | 1                     |
| 373.30813    | C23H44O2         | [M-2H+Na]- | 0.327       | ↑*               | Fatty Acyls [FA]    | 4.0                   | No              | 3                     |
| 742.53840    | C41H78NO8P       | [M-H]-     | 0.376       | ↑*               | Fatty Acyls [FA]    | 3.9                   | No              | 3                     |
| 385.30777    | C24H44O2         | [M-2H+Na]- | 1.250       | ↑*               | Fatty Acyls [FA]    | 3.7                   | No              | 1                     |
| 673.48138    | C37H71O8P        | [M-H]-     | 0.815       | ↑*               | Fatty Acyls [FA]    | 3.5                   | No              | 1                     |
| 355.18862    | C20H30O4         | [M-2H+Na]- | 0.249       | ↑*               | Fatty Acyls [FA]    | 3.5                   | No              | 3                     |
| 745.50146    | C40H75O10P       | [M-H]-     | 0.682       | ↑*               | Fatty Acyls [FA]    | 3.2                   | No              | 1                     |
| 768.45788    | C42H70NO8P       | [M-2H+Na]- | 0.190       | ↑*               | Fatty Acyls [FA]    | 3.2                   | No              | 1                     |
| 477.04114    | C18H34Br2O2      | [M-2H+K]-  | 1.115       | ↑*               | Fatty Acyls [FA]    | 3.1                   | No              | 2                     |
| 628.05830    | C17H27N3O17P2    | [M-2H+Na]- | 4.146       | ↑                | Saccharolipids [SL] | 3.1                   | No              | 1                     |
| 687.45971    | C35H71O9P        | [M-2H+Na]- | 2.936       | ↑*               | Fatty Acyls [FA]    | 3.1                   | No              | 2                     |
| 613.06004    | C26H24O15        | [M-2H+K]-  | 0.751       | ↑*               | Fatty Acyls [FA]    | 3.0                   | No              | 2                     |
| 597.45186    | C38H62O5         | [M-H]-     | 0.065       | ↑*               | Fatty Acyls [FA]    | 3.0                   | No              | 2                     |
| 687.47887    | C43H70O4         | [M-2H+K]-  | 4.955       | ↑*               | Fatty Acyls [FA]    | 3.0                   | No              | 2                     |
| 363.28787    | C21H42O3         | [M-2H+Na]- | 0.976       | ↑*               | Fatty Acyls [FA]    | 3.0                   | No              | 2                     |
| 732.51769    | C39H76NO9P       | [M-H]-     | 0.358       | ↑*               | Fatty Acyls [FA]    | 3.0                   | No              | 1                     |
